# Supplementary material for: ATP burst is the dominant driver of antibiotic lethality in Mycobacterium smegmatis
Source: eLife. 2026 Jan 13;13:RP99656. doi: 10.7554/eLife.99656 (PMC12799214; doi:10.7554/eLife.99656)
Supplement: Figure 2—figure supplement 1—source data 1. [file elife-99656-fig2-figsupp1-data1.xlsx]

## Sheet: Norfloxacin 7.5hr protein group
Protein IDs	Majority protein IDs	Peptide counts (all)	Peptide counts (razor+unique)	Peptide counts (unique)	Fasta headers	Number of proteins	Peptides	Razor + unique peptides	Unique peptides	Peptides 1	Peptides 10	Peptides 2	Peptides 3	Peptides 4	Peptides 5	Peptides 6	Peptides 7	Peptides 8	Peptides 9	Razor + unique peptides 1	Razor + unique peptides 10	Razor + unique peptides 2	Razor + unique peptides 3	Razor + unique peptides 4	Razor + unique peptides 5	Razor + unique peptides 6	Razor + unique peptides 7	Razor + unique peptides 8	Razor + unique peptides 9	Unique peptides 1	Unique peptides 10	Unique peptides 2	Unique peptides 3	Unique peptides 4	Unique peptides 5	Unique peptides 6	Unique peptides 7	Unique peptides 8	Unique peptides 9	Sequence coverage [%]	Unique + razor sequence coverage [%]	Unique sequence coverage [%]	Mol. weight [kDa]	Sequence length	Sequence lengths	Q-value	Score	Identification type 1	Identification type 10
MSMEG_0001|dnaN|DNA	MSMEG_0001|dnaN|DNA	17	17	17	MSMEG_0001|dnaN|DNA polymerase III, beta subunit|397 AA	1	17	17	17	12	16	13	15	16	15	14	16	15	14	12	16	13	15	16	15	14	16	15	14	12	16	13	15	16	15	14	16	15	14	58.7	58.7	58.7	41.324	397	397	0	169.29	By MS/MS	By MS/MS
MSMEG_0002|MSMEG_0002|6-phosphogluconate	MSMEG_0002|MSMEG_0002|6-phosphogluconate	8	8	8	MSMEG_0002|MSMEG_0002|6-phosphogluconate dehydrogenase, decarboxylating|297 AA	1	8	8	8	7	7	7	7	7	7	7	8	8	6	7	7	7	7	7	7	7	8	8	6	7	7	7	7	7	7	7	8	8	6	39.4	39.4	39.4	31.536	297	297	0	66.729	By MS/MS	By MS/MS
MSMEG_0004|MSMEG_0004|hypothetical	MSMEG_0004|MSMEG_0004|hypothetical	2	2	2	MSMEG_0004|MSMEG_0004|hypothetical protein|194 AA	1	2	2	2	2	2	2	2	2	1	2	1	1	0	2	2	2	2	2	1	2	1	1	0	2	2	2	2	2	1	2	1	1	0	20.6	20.6	20.6	20.511	194	194	0	6.7854	By MS/MS	By MS/MS
MSMEG_0005|gyrB|DNA;MSMEG_1229|gyrB|DNA	MSMEG_0005|gyrB|DNA;MSMEG_1229|gyrB|DNA	11;7	11;7	11;7	MSMEG_0005|gyrB|DNA gyrase, B subunit|675 AA;MSMEG_1229|gyrB|DNA gyrase, B subunit|639 AA	2	11	11	11	6	9	8	6	10	9	9	10	9	10	6	9	8	6	10	9	9	10	9	10	6	9	8	6	10	9	9	10	9	10	20.1	20.1	20.1	74.511	675	675;639	0	82.814	By MS/MS	By MS/MS
MSMEG_0006|gyrA|DNA	MSMEG_0006|gyrA|DNA	20	20	20	MSMEG_0006|gyrA|DNA gyrase, A subunit|842 AA	1	20	20	20	13	17	18	17	15	14	12	14	16	18	13	17	18	17	15	14	12	14	16	18	13	17	18	17	15	14	12	14	16	18	34.8	34.8	34.8	93.182	842	842	0	161.24	By MS/MS	By MS/MS
MSMEG_0007|MSMEG_0007|conserved	MSMEG_0007|MSMEG_0007|conserved	3	3	3	MSMEG_0007|MSMEG_0007|conserved hypothetical protein|260 AA	1	3	3	3	2	3	2	2	2	2	2	3	2	2	2	3	2	2	2	2	2	3	2	2	2	3	2	2	2	2	2	3	2	2	23.1	23.1	23.1	27.228	260	260	0	79.076	By MS/MS	By MS/MS
MSMEG_0014|MSMEG_0014|Formyl	MSMEG_0014|MSMEG_0014|Formyl	3	3	3	MSMEG_0014|MSMEG_0014|Formyl transferase|322 AA	1	3	3	3	1	0	0	1	1	0	2	0	3	3	1	0	0	1	1	0	2	0	3	3	1	0	0	1	1	0	2	0	3	3	15.5	15.5	15.5	35.617	322	322	0	3.2459	By matching
MSMEG_0020|MSMEG_0020|Periplasmic	MSMEG_0020|MSMEG_0020|Periplasmic	7	7	7	MSMEG_0020|MSMEG_0020|Periplasmic binding protein|315 AA	1	7	7	7	7	5	6	7	7	5	6	6	7	7	7	5	6	7	7	5	6	6	7	7	7	5	6	7	7	5	6	6	7	7	35.2	35.2	35.2	34.008	315	315	0	27.681	By MS/MS	By matching
MSMEG_0023|MSMEG_0023|conserved	MSMEG_0023|MSMEG_0023|conserved	2	2	2	MSMEG_0023|MSMEG_0023|conserved hypothetical protein|136 AA	1	2	2	2	2	2	2	2	2	2	2	2	2	2	2	2	2	2	2	2	2	2	2	2	2	2	2	2	2	2	2	2	2	2	21.3	21.3	21.3	14.401	136	136	0	26.521	By MS/MS	By MS/MS
MSMEG_0024|MSMEG_0024|peptidyl-prolyl	MSMEG_0024|MSMEG_0024|peptidyl-prolyl	10	10	10	MSMEG_0024|MSMEG_0024|peptidyl-prolyl cis-trans isomerase B|175 AA	1	10	10	10	8	9	8	9	8	8	8	8	9	9	8	9	8	9	8	8	8	8	9	9	8	9	8	9	8	8	8	8	9	9	90.3	90.3	90.3	18.726	175	175	0	231.06	By MS/MS	By MS/MS
MSMEG_0028|MSMEG_0028|serine-threonine	MSMEG_0028|MSMEG_0028|serine-threonine	9	9	9	MSMEG_0028|MSMEG_0028|serine-threonine protein kinase|625 AA	1	9	9	9	6	7	6	7	6	6	4	7	7	8	6	7	6	7	6	6	4	7	7	8	6	7	6	7	6	6	4	7	7	8	27.7	27.7	27.7	66.317	625	625	0	96.84	By MS/MS	By MS/MS
MSMEG_0029|MSMEG_0029|anthranilate	MSMEG_0029|MSMEG_0029|anthranilate	1	1	1	MSMEG_0029|MSMEG_0029|anthranilate synthase component 2|224 AA	1	1	1	1	0	1	0	0	1	1	0	1	1	0	0	1	0	0	1	1	0	1	1	0	0	1	0	0	1	1	0	1	1	0	12.5	12.5	12.5	23.578	224	224	0	6.5891		By matching
MSMEG_0033|MSMEG_0033|protein	MSMEG_0033|MSMEG_0033|protein	7	7	7	MSMEG_0033|MSMEG_0033|protein phosphatase 2C|512 AA	1	7	7	7	3	4	2	4	4	5	4	4	3	5	3	4	2	4	4	5	4	4	3	5	3	4	2	4	4	5	4	4	3	5	21.3	21.3	21.3	53.329	512	512	0	43.791	By MS/MS	By MS/MS
MSMEG_0034|MSMEG_0034|FHA	MSMEG_0034|MSMEG_0034|FHA	1	1	1	MSMEG_0034|MSMEG_0034|FHA domain protein|155 AA	1	1	1	1	1	0	1	1	1	1	1	1	1	1	1	0	1	1	1	1	1	1	1	1	1	0	1	1	1	1	1	1	1	1	7.7	7.7	7.7	17.125	155	155	0.0013819	2.6616	By matching
MSMEG_0035|MSMEG_0035|FHA	MSMEG_0035|MSMEG_0035|FHA	14	14	14	MSMEG_0035|MSMEG_0035|FHA domain protein|487 AA	1	14	14	14	10	11	9	10	9	11	12	11	12	10	10	11	9	10	9	11	12	11	12	10	10	11	9	10	9	11	12	11	12	10	55	55	55	52.025	487	487	0	181.03	By MS/MS	By MS/MS
MSMEG_0042|MSMEG_0042|TetR-family	MSMEG_0042|MSMEG_0042|TetR-family	4	4	4	MSMEG_0042|MSMEG_0042|TetR-family protein transcriptional regulator|187 AA	1	4	4	4	3	3	3	3	4	4	4	2	4	4	3	3	3	3	4	4	4	2	4	4	3	3	3	3	4	4	4	2	4	4	28.3	28.3	28.3	21.122	187	187	0	14.391	By matching	By MS/MS
MSMEG_0044|MSMEG_0044|hypothetical	MSMEG_0044|MSMEG_0044|hypothetical	3	3	3	MSMEG_0044|MSMEG_0044|hypothetical protein|692 AA	1	3	3	3	2	2	1	1	1	1	1	0	1	1	2	2	1	1	1	1	1	0	1	1	2	2	1	1	1	1	1	0	1	1	5.8	5.8	5.8	74.977	692	692	0	6.0375	By MS/MS	By MS/MS
MSMEG_0048|MSMEG_0048|pyridoxamine	MSMEG_0048|MSMEG_0048|pyridoxamine	5	5	5	MSMEG_0048|MSMEG_0048|pyridoxamine 5-phosphate oxidase family protein|167 AA	1	5	5	5	2	5	4	4	5	4	4	5	4	3	2	5	4	4	5	4	4	5	4	3	2	5	4	4	5	4	4	5	4	3	46.1	46.1	46.1	18.885	167	167	0	59.131	By MS/MS	By MS/MS
MSMEG_0049|MSMEG_0049|pirin	MSMEG_0049|MSMEG_0049|pirin	1	1	1	MSMEG_0049|MSMEG_0049|pirin domain protein|321 AA	1	1	1	1	0	0	0	1	0	0	0	0	0	0	0	0	0	1	0	0	0	0	0	0	0	0	0	1	0	0	0	0	0	0	5	5	5	34.245	321	321	0	6.9027
MSMEG_0050|MSMEG_0050|conserved	MSMEG_0050|MSMEG_0050|conserved	1	1	1	MSMEG_0050|MSMEG_0050|conserved hypothetical protein|88 AA	1	1	1	1	0	1	1	1	1	0	0	1	1	1	0	1	1	1	1	0	0	1	1	1	0	1	1	1	1	0	0	1	1	1	22.7	22.7	22.7	9.834	88	88	0	12.45		By MS/MS
MSMEG_0052|MSMEG_0052|conserved	MSMEG_0052|MSMEG_0052|conserved	4	4	4	MSMEG_0052|MSMEG_0052|conserved hypothetical protein|259 AA	1	4	4	4	2	2	3	4	3	3	1	3	3	3	2	2	3	4	3	3	1	3	3	3	2	2	3	4	3	3	1	3	3	3	22.8	22.8	22.8	27.243	259	259	0	34.357	By MS/MS	By MS/MS
MSMEG_0057|espG1|conserved	MSMEG_0057|espG1|conserved	4	4	4	MSMEG_0057|espG1|conserved hypothetical protein|282 AA	1	4	4	4	2	3	3	2	3	3	2	2	3	2	2	3	3	2	3	3	2	2	3	2	2	3	3	2	3	3	2	2	3	2	17.7	17.7	17.7	30.581	282	282	0	17.031	By MS/MS	By MS/MS
MSMEG_0058|MSMEG_0058|conserved	MSMEG_0058|MSMEG_0058|conserved	5	5	5	MSMEG_0058|MSMEG_0058|conserved hypothetical protein|175 AA	1	5	5	5	4	5	4	4	3	4	5	4	3	4	4	5	4	4	3	4	5	4	3	4	4	5	4	4	3	4	5	4	3	4	34.3	34.3	34.3	18.859	175	175	0	45.97	By MS/MS	By MS/MS
MSMEG_0059|eccA1|ATPase,	MSMEG_0059|eccA1|ATPase,	6	6	6	MSMEG_0059|eccA1|ATPase, AAA family protein|574 AA	1	6	6	6	4	5	4	5	5	5	5	5	5	5	4	5	4	5	5	5	5	5	5	5	4	5	4	5	5	5	5	5	5	5	16.2	16.2	16.2	62.147	574	574	0	27.876	By MS/MS	By MS/MS
MSMEG_0060|eccB1|conserved	MSMEG_0060|eccB1|conserved	7	7	7	MSMEG_0060|eccB1|conserved hypothetical protein|479 AA	1	7	7	7	3	4	3	5	4	3	5	3	5	6	3	4	3	5	4	3	5	3	5	6	3	4	3	5	4	3	5	3	5	6	27.3	27.3	27.3	51.022	479	479	0	15.377	By MS/MS	By MS/MS
MSMEG_0062|eccC1b|ftsk/spoiiie	MSMEG_0062|eccC1b|ftsk/spoiiie	1	1	1	MSMEG_0062|eccC1b|ftsk/spoiiie family protein|593 AA	1	1	1	1	1	1	1	1	1	1	1	1	1	1	1	1	1	1	1	1	1	1	1	1	1	1	1	1	1	1	1	1	1	1	2.2	2.2	2.2	65.056	593	593	0.0013902	2.7401	By matching	By MS/MS
MSMEG_0063|MSMEG_0063|PE	MSMEG_0063|MSMEG_0063|PE	2	2	2	MSMEG_0063|MSMEG_0063|PE family protein|97 AA	1	2	2	2	2	2	2	2	2	2	2	2	2	2	2	2	2	2	2	2	2	2	2	2	2	2	2	2	2	2	2	2	2	2	47.4	47.4	47.4	9.2853	97	97	0	29.119	By MS/MS	By MS/MS
MSMEG_0064|MSMEG_0064|ppe	MSMEG_0064|MSMEG_0064|ppe	3	3	3	MSMEG_0064|MSMEG_0064|ppe family protein|431 AA	1	3	3	3	3	3	3	3	3	3	2	3	2	2	3	3	3	3	3	3	2	3	2	2	3	3	3	3	3	3	2	3	2	2	16.9	16.9	16.9	43.631	431	431	0	46.912	By MS/MS	By MS/MS
MSMEG_0065|MSMEG_0065|conserved	MSMEG_0065|MSMEG_0065|conserved	3	3	3	MSMEG_0065|MSMEG_0065|conserved hypothetical protein|100 AA	1	3	3	3	3	3	3	3	3	3	3	3	3	3	3	3	3	3	3	3	3	3	3	3	3	3	3	3	3	3	3	3	3	3	79	79	79	10.225	100	100	0	73.799	By MS/MS	By MS/MS
MSMEG_0066|MSMEG_0066|early	MSMEG_0066|MSMEG_0066|early	3	3	3	MSMEG_0066|MSMEG_0066|early secretory antigenic target, 6 kDa|95 AA	1	3	3	3	2	3	3	3	3	2	2	3	2	3	2	3	3	3	3	2	2	3	2	3	2	3	3	3	3	2	2	3	2	3	98.9	98.9	98.9	9.7375	95	95	0	87.113	By MS/MS	By MS/MS
MSMEG_0067|MSMEG_0067|conserved	MSMEG_0067|MSMEG_0067|conserved	10	10	10	MSMEG_0067|MSMEG_0067|conserved hypothetical protein|474 AA	1	10	10	10	8	10	5	9	8	9	7	10	9	9	8	10	5	9	8	9	7	10	9	9	8	10	5	9	8	9	7	10	9	9	42	42	42	50.938	474	474	0	68.882	By MS/MS	By MS/MS
MSMEG_0069|MSMEG_0069|translation	MSMEG_0069|MSMEG_0069|translation	4	4	4	MSMEG_0069|MSMEG_0069|translation initiation factor IF-2 protein|233 AA	1	4	4	4	4	3	4	4	3	4	3	3	3	3	4	3	4	4	3	4	3	3	3	3	4	3	4	4	3	4	3	3	3	3	18.5	18.5	18.5	24.403	233	233	0	40.374	By MS/MS	By MS/MS
MSMEG_0070|MSMEG_0070|hypothetical	MSMEG_0070|MSMEG_0070|hypothetical	3	3	3	MSMEG_0070|MSMEG_0070|hypothetical protein|111 AA	1	3	3	3	1	3	3	2	3	2	2	2	3	3	1	3	3	2	3	2	2	2	3	3	1	3	3	2	3	2	2	2	3	3	46.8	46.8	46.8	11.927	111	111	0	20.003	By matching	By matching
MSMEG_0071|MSMEG_0071|conserved;MSMEG_0075|MSMEG_0075|conserved	MSMEG_0071|MSMEG_0071|conserved	12;2	12;2	12;2	MSMEG_0071|MSMEG_0071|conserved hypothetical protein|755 AA	2	12	12	12	12	12	12	12	12	11	12	12	11	11	12	12	12	12	12	11	12	12	11	11	12	12	12	12	12	11	12	12	11	11	22.9	22.9	22.9	78.244	755	755;118	0	45.764	By MS/MS	By MS/MS
MSMEG_0076|MSMEG_0076|antigen	MSMEG_0076|MSMEG_0076|antigen	8	8	8	MSMEG_0076|MSMEG_0076|antigen MTB48|520 AA	1	8	8	8	7	7	8	7	8	8	7	7	7	7	7	7	8	7	8	8	7	7	7	7	7	7	8	7	8	8	7	7	7	7	19.6	19.6	19.6	52.119	520	520	0	57.606	By MS/MS	By MS/MS
MSMEG_0077|MSMEG_0077|hypothetical	MSMEG_0077|MSMEG_0077|hypothetical	5	5	5	MSMEG_0077|MSMEG_0077|hypothetical protein|105 AA	1	5	5	5	5	5	4	4	4	5	4	5	4	4	5	5	4	4	4	5	4	5	4	4	5	5	4	4	4	5	4	5	4	4	42.9	42.9	42.9	10.717	105	105	0	100.85	By MS/MS	By MS/MS
MSMEG_0078|MSMEG_0078|hypothetical	MSMEG_0078|MSMEG_0078|hypothetical	7	7	7	MSMEG_0078|MSMEG_0078|hypothetical protein|191 AA	1	7	7	7	5	6	6	5	4	5	5	4	5	5	5	6	6	5	4	5	5	4	5	5	5	6	6	5	4	5	5	4	5	5	59.7	59.7	59.7	20.589	191	191	0	149.19	By MS/MS	By MS/MS
MSMEG_0080|MSMEG_0080|conserved	MSMEG_0080|MSMEG_0080|conserved	3	3	3	MSMEG_0080|MSMEG_0080|conserved hypothetical protein|176 AA	1	3	3	3	2	3	3	3	2	3	3	3	3	2	2	3	3	3	2	3	3	3	3	2	2	3	3	3	2	3	3	3	3	2	27.8	27.8	27.8	18.619	176	176	0	6.8431	By matching	By MS/MS
MSMEG_0081|MSMEG_0081|conserved	MSMEG_0081|MSMEG_0081|conserved	4	4	4	MSMEG_0081|MSMEG_0081|conserved hypothetical protein|110 AA	1	4	4	4	3	4	3	3	3	3	4	4	3	4	3	4	3	3	3	3	4	4	3	4	3	4	3	3	3	3	4	4	3	4	48.2	48.2	48.2	12.09	110	110	0	45.297	By MS/MS	By MS/MS
MSMEG_0084|MSMEG_0084|phosphocarrier	MSMEG_0084|MSMEG_0084|phosphocarrier	4	4	4	MSMEG_0084|MSMEG_0084|phosphocarrier protein hpr|85 AA	1	4	4	4	3	4	4	4	4	4	3	4	4	4	3	4	4	4	4	4	3	4	4	4	3	4	4	4	4	4	3	4	4	4	95.3	95.3	95.3	8.3875	85	85	0	30.837	By MS/MS	By MS/MS
MSMEG_0085|MSMEG_0085|PTS	MSMEG_0085|MSMEG_0085|PTS	6	6	6	MSMEG_0085|MSMEG_0085|PTS system, Fru family protein, IIABC components|671 AA	1	6	6	6	6	5	5	5	5	5	5	6	5	5	6	5	5	5	5	5	5	6	5	5	6	5	5	5	5	5	5	6	5	5	14.6	14.6	14.6	67.396	671	671	0	14.467	By MS/MS	By MS/MS
MSMEG_0086|MSMEG_0086|1-phosphofructokinase|327	MSMEG_0086|MSMEG_0086|1-phosphofructokinase|327	5	5	5	MSMEG_0086|MSMEG_0086|1-phosphofructokinase|327 AA	1	5	5	5	4	5	5	5	4	5	3	4	5	4	4	5	5	5	4	5	3	4	5	4	4	5	5	5	4	5	3	4	5	4	24.5	24.5	24.5	32.878	327	327	0	47.532	By MS/MS	By MS/MS
MSMEG_0087|MSMEG_0087|glucitol	MSMEG_0087|MSMEG_0087|glucitol	7	7	7	MSMEG_0087|MSMEG_0087|glucitol operon repressor|255 AA	1	7	7	7	6	5	6	6	5	6	5	6	7	6	6	5	6	6	5	6	5	6	7	6	6	5	6	6	5	6	5	6	7	6	40.4	40.4	40.4	26.855	255	255	0	62.064	By MS/MS	By MS/MS
MSMEG_0088|ptsI|phosphoenolpyruvate-protein	MSMEG_0088|ptsI|phosphoenolpyruvate-protein	13	13	13	MSMEG_0088|ptsI|phosphoenolpyruvate-protein phosphotransferase|544 AA	1	13	13	13	10	9	10	11	9	9	11	11	12	9	10	9	10	11	9	9	11	11	12	9	10	9	10	11	9	9	11	11	12	9	42.1	42.1	42.1	55.471	544	544	0	204.31	By MS/MS	By MS/MS
MSMEG_0089|MSMEG_0089|chromosome	MSMEG_0089|MSMEG_0089|chromosome	2	2	2	MSMEG_0089|MSMEG_0089|chromosome condensation protein|324 AA	1	2	2	2	2	1	2	2	2	2	1	2	2	2	2	1	2	2	2	2	1	2	2	2	2	1	2	2	2	2	1	2	2	2	7.1	7.1	7.1	34.63	324	324	0	5.3225	By MS/MS	By matching
MSMEG_0091|MSMEG_0091|putative	MSMEG_0091|MSMEG_0091|putative	2	2	2	MSMEG_0091|MSMEG_0091|putative transcriptional regulator|197 AA	1	2	2	2	2	2	1	2	2	2	2	2	2	2	2	2	1	2	2	2	2	2	2	2	2	2	1	2	2	2	2	2	2	2	16.2	16.2	16.2	22.077	197	197	0	13.288	By MS/MS	By matching
MSMEG_0092|MSMEG_0092|probable	MSMEG_0092|MSMEG_0092|probable	2	2	2	MSMEG_0092|MSMEG_0092|probable transcriptional regulatory protein|211 AA	1	2	2	2	2	2	0	0	2	1	2	2	1	2	2	2	0	0	2	1	2	2	1	2	2	2	0	0	2	1	2	2	1	2	15.2	15.2	15.2	23.067	211	211	0	17.998	By MS/MS	By matching
MSMEG_0093|MSMEG_0093|methyltransferase|320	MSMEG_0093|MSMEG_0093|methyltransferase|320	4	4	4	MSMEG_0093|MSMEG_0093|methyltransferase|320 AA	1	4	4	4	4	3	3	4	3	3	4	4	4	4	4	3	3	4	3	3	4	4	4	4	4	3	3	4	3	3	4	4	4	4	19.4	19.4	19.4	35.147	320	320	0	24.406	By MS/MS	By MS/MS
MSMEG_0095|MSMEG_0095|methyltransferase|311	MSMEG_0095|MSMEG_0095|methyltransferase|311	7	7	7	MSMEG_0095|MSMEG_0095|methyltransferase|311 AA	1	7	7	7	5	4	7	6	6	6	7	6	7	6	5	4	7	6	6	6	7	6	7	6	5	4	7	6	6	6	7	6	7	6	37.9	37.9	37.9	34.556	311	311	0	39.674	By MS/MS	By MS/MS
MSMEG_0096|MSMEG_0096|peroxisomal	MSMEG_0096|MSMEG_0096|peroxisomal	6	6	6	MSMEG_0096|MSMEG_0096|peroxisomal hydratase-dehydrogenase-epimerase|284 AA	1	6	6	6	5	5	5	6	4	5	6	5	5	5	5	5	5	6	4	5	6	5	5	5	5	5	5	6	4	5	6	5	5	5	29.2	29.2	29.2	29.985	284	284	0	142.39	By MS/MS	By MS/MS
MSMEG_0097|MSMEG_0097|oxidoreductase,	MSMEG_0097|MSMEG_0097|oxidoreductase,	5	5	5	MSMEG_0097|MSMEG_0097|oxidoreductase, zinc-binding dehydrogenase family protein|321 AA	1	5	5	5	4	2	3	4	4	2	3	2	4	4	4	2	3	4	4	2	3	2	4	4	4	2	3	4	4	2	3	2	4	4	25.5	25.5	25.5	32.573	321	321	0	14.897	By MS/MS	By MS/MS
MSMEG_0100|MSMEG_0100|phosphotyrosine	MSMEG_0100|MSMEG_0100|phosphotyrosine	6	6	6	MSMEG_0100|MSMEG_0100|phosphotyrosine protein phosphatase ptpb|268 AA	1	6	6	6	6	5	4	6	6	5	5	5	4	4	6	5	4	6	6	5	5	5	4	4	6	5	4	6	6	5	5	5	4	4	30.2	30.2	30.2	29.272	268	268	0	90.573	By MS/MS	By MS/MS
MSMEG_0102|MSMEG_0102|putative	MSMEG_0102|MSMEG_0102|putative	11	11	11	MSMEG_0102|MSMEG_0102|putative acyl-CoA dehydrogenase|411 AA	1	11	11	11	6	9	6	10	9	9	8	10	11	11	6	9	6	10	9	9	8	10	11	11	6	9	6	10	9	9	8	10	11	11	37.5	37.5	37.5	45.415	411	411	0	65.437	By MS/MS	By MS/MS
MSMEG_0108|MSMEG_0108|acyl-CoA	MSMEG_0108|MSMEG_0108|acyl-CoA	12	12	12	MSMEG_0108|MSMEG_0108|acyl-CoA dehydrogenase|379 AA	1	12	12	12	8	8	9	10	10	9	8	11	11	12	8	8	9	10	10	9	8	11	11	12	8	8	9	10	10	9	8	11	11	12	49.3	49.3	49.3	40.48	379	379	0	129.48	By MS/MS	By MS/MS
MSMEG_0110|pntA|NAD(P);MSMEG_4109|pntA|NAD(P)	MSMEG_0110|pntA|NAD(P);MSMEG_4109|pntA|NAD(P)	7;4	7;4	7;4	MSMEG_0110|pntA|NAD(P) transhydrogenase, alpha subunit|513 AA;MSMEG_4109|pntA|NAD(P) transhydrogenase, alpha subunit|515 AA	2	7	7	7	6	6	6	6	6	6	7	5	6	6	6	6	6	6	6	6	7	5	6	6	6	6	6	6	6	6	7	5	6	6	18.9	18.9	18.9	52.706	513	513;515	0	26.347	By MS/MS	By MS/MS
MSMEG_0114|MSMEG_0114|extracellular	MSMEG_0114|MSMEG_0114|extracellular	6	6	6	MSMEG_0114|MSMEG_0114|extracellular solute-binding protein, family protein 3|342 AA	1	6	6	6	4	5	5	6	5	5	5	5	6	5	4	5	5	6	5	5	5	5	6	5	4	5	5	6	5	5	5	5	6	5	27.8	27.8	27.8	35.982	342	342	0	34.717	By MS/MS	By MS/MS
MSMEG_0118|MSMEG_0118|conserved	MSMEG_0118|MSMEG_0118|conserved	3	3	3	MSMEG_0118|MSMEG_0118|conserved hypothetical protein|166 AA	1	3	3	3	1	1	1	1	0	0	1	0	2	1	1	1	1	1	0	0	1	0	2	1	1	1	1	1	0	0	1	0	2	1	27.7	27.7	27.7	18.685	166	166	0	5.2599	By MS/MS	By MS/MS
MSMEG_0119|MSMEG_0119|conserved;MSMEG_0519|MSMEG_0519|conserved	MSMEG_0119|MSMEG_0119|conserved;MSMEG_0519|MSMEG_0519|conserved	1;1	1;1	1;1	MSMEG_0119|MSMEG_0119|conserved hypothetical protein|36 AA;MSMEG_0519|MSMEG_0519|conserved hypothetical protein|38 AA	2	1	1	1	1	1	1	1	1	1	1	1	1	1	1	1	1	1	1	1	1	1	1	1	1	1	1	1	1	1	1	1	1	1	30.6	30.6	30.6	4.1996	36	36;38	0	5.6252	By MS/MS	By MS/MS
MSMEG_0120|MSMEG_0120|probable	MSMEG_0120|MSMEG_0120|probable	2	2	2	MSMEG_0120|MSMEG_0120|probable transcriptional regulatory protein|219 AA	1	2	2	2	0	0	0	0	0	0	0	2	2	1	0	0	0	0	0	0	0	2	2	1	0	0	0	0	0	0	0	2	2	1	13.2	13.2	13.2	24.759	219	219	0	4.1436
MSMEG_0127|MSMEG_0127|oxidoreductase,	MSMEG_0127|MSMEG_0127|oxidoreductase,	11	11	11	MSMEG_0127|MSMEG_0127|oxidoreductase, zinc-binding dehydrogenase family protein|363 AA	1	11	11	11	7	10	9	10	10	8	9	10	11	11	7	10	9	10	10	8	9	10	11	11	7	10	9	10	10	8	9	10	11	11	55.1	55.1	55.1	37.357	363	363	0	118.93	By MS/MS	By MS/MS
MSMEG_0131|MSMEG_0131|AMP-binding	MSMEG_0131|MSMEG_0131|AMP-binding	10	10	10	MSMEG_0131|MSMEG_0131|AMP-binding enzyme, putative|544 AA	1	10	10	10	8	9	7	10	9	8	8	9	9	9	8	9	7	10	9	8	8	9	9	9	8	9	7	10	9	8	8	9	9	9	32	32	32	58.443	544	544	0	110.19	By MS/MS	By MS/MS
MSMEG_0134|MSMEG_0134|virulence	MSMEG_0134|MSMEG_0134|virulence	4	4	2	MSMEG_0134|MSMEG_0134|virulence factor Mce family protein|409 AA	1	4	4	2	1	1	2	1	1	2	1	2	1	3	1	1	2	1	1	2	1	2	1	3	0	1	1	1	1	1	1	2	1	2	17.6	17.6	9.5	43.91	409	409	0	16.889	By matching	By MS/MS
MSMEG_0135|MSMEG_0135|virulence	MSMEG_0135|MSMEG_0135|virulence	2	2	2	MSMEG_0135|MSMEG_0135|virulence factor Mce family protein|343 AA	1	2	2	2	1	2	2	1	2	2	1	1	1	2	1	2	2	1	2	2	1	1	1	2	1	2	2	1	2	2	1	1	1	2	7.3	7.3	7.3	37.431	343	343	0	4.3884	By matching	By matching
MSMEG_0137|MSMEG_0137|virulence	MSMEG_0137|MSMEG_0137|virulence	3	3	3	MSMEG_0137|MSMEG_0137|virulence factor mce family protein|547 AA	1	3	3	3	0	1	2	2	1	2	1	1	1	2	0	1	2	2	1	2	1	1	1	2	0	1	2	2	1	2	1	1	1	2	6.9	6.9	6.9	58.012	547	547	0	3.2606		By matching
MSMEG_0139|MSMEG_0139|mce-family	MSMEG_0139|MSMEG_0139|mce-family	1	1	1	MSMEG_0139|MSMEG_0139|mce-family protein mce1f|518 AA	1	1	1	1	0	1	0	0	0	0	0	0	0	0	0	1	0	0	0	0	0	0	0	0	0	1	0	0	0	0	0	0	0	0	2.9	2.9	2.9	54.304	518	518	0	7.2962		By MS/MS
MSMEG_0143|MSMEG_0143|probable	MSMEG_0143|MSMEG_0143|probable	2	2	2	MSMEG_0143|MSMEG_0143|probable conserved mce associated membrane protein|296 AA	1	2	2	2	1	1	1	1	1	1	1	2	1	1	1	1	1	1	1	1	1	2	1	1	1	1	1	1	1	1	1	2	1	1	17.6	17.6	17.6	32.036	296	296	0	25.651	By MS/MS	By MS/MS
MSMEG_0146|MSMEG_0146|mosc	MSMEG_0146|MSMEG_0146|mosc	9	9	9	MSMEG_0146|MSMEG_0146|mosc domain protein|272 AA	1	9	9	9	7	9	9	8	8	6	8	9	7	8	7	9	9	8	8	6	8	9	7	8	7	9	9	8	8	6	8	9	7	8	48.5	48.5	48.5	29.787	272	272	0	61.441	By MS/MS	By MS/MS
MSMEG_0152|MSMEG_0152|Alanine	MSMEG_0152|MSMEG_0152|Alanine	1	1	1	MSMEG_0152|MSMEG_0152|Alanine dehydrogenase/pyridine nucleotide transhydrogenase|360 AA	1	1	1	1	0	0	0	0	0	0	1	0	0	0	0	0	0	0	0	0	1	0	0	0	0	0	0	0	0	0	1	0	0	0	3.6	3.6	3.6	37.307	360	360	0	4.4446
MSMEG_0154|pyk|pyruvate	MSMEG_0154|pyk|pyruvate	2	2	2	MSMEG_0154|pyk|pyruvate kinase|477 AA	1	2	2	2	2	0	2	2	2	2	2	2	2	2	2	0	2	2	2	2	2	2	2	2	2	0	2	2	2	2	2	2	2	2	4.8	4.8	4.8	50.24	477	477	0.00093371	2.8445	By MS/MS
MSMEG_0155|MSMEG_0155|transcriptional	MSMEG_0155|MSMEG_0155|transcriptional	2	2	2	MSMEG_0155|MSMEG_0155|transcriptional regulator|156 AA	1	2	2	2	2	2	2	2	2	2	2	2	2	2	2	2	2	2	2	2	2	2	2	2	2	2	2	2	2	2	2	2	2	2	16	16	16	16.93	156	156	0	6.9912	By MS/MS	By matching
MSMEG_0158|MSMEG_0158|formyl-coenzyme	MSMEG_0158|MSMEG_0158|formyl-coenzyme	11	11	11	MSMEG_0158|MSMEG_0158|formyl-coenzyme A transferase|420 AA	1	11	11	11	9	9	8	9	9	10	10	11	11	10	9	9	8	9	9	10	10	11	11	10	9	9	8	9	9	10	10	11	11	10	32.6	32.6	32.6	46.087	420	420	0	43.752	By MS/MS	By MS/MS
MSMEG_0166|MSMEG_0166|GntR-family	MSMEG_0166|MSMEG_0166|GntR-family	2	2	2	MSMEG_0166|MSMEG_0166|GntR-family protein transcriptional regulator|242 AA	1	2	2	2	2	2	2	2	2	2	2	2	2	2	2	2	2	2	2	2	2	2	2	2	2	2	2	2	2	2	2	2	2	2	12	12	12	27.054	242	242	0	32.53	By MS/MS	By MS/MS
MSMEG_0179|MSMEG_0179|transcriptional	MSMEG_0179|MSMEG_0179|transcriptional	3	3	3	MSMEG_0179|MSMEG_0179|transcriptional regulator, GntR family protein|223 AA	1	3	3	3	3	3	3	3	2	3	3	2	3	1	3	3	3	3	2	3	3	2	3	1	3	3	3	3	2	3	3	2	3	1	13	13	13	24.52	223	223	0	3.0808	By MS/MS	By MS/MS
MSMEG_0187|MSMEG_0187|acetyltransferase|158	MSMEG_0187|MSMEG_0187|acetyltransferase|158	7	7	7	MSMEG_0187|MSMEG_0187|acetyltransferase|158 AA	1	7	7	7	5	5	6	7	7	4	7	7	7	7	5	5	6	7	7	4	7	7	7	7	5	5	6	7	7	4	7	7	7	7	43	43	43	17.742	158	158	0	15.727	By MS/MS	By MS/MS
MSMEG_0194|MSMEG_0194|serine	MSMEG_0194|MSMEG_0194|serine	7	7	7	MSMEG_0194|MSMEG_0194|serine esterase, cutinase family protein|232 AA	1	7	7	7	6	7	6	6	6	6	6	7	7	7	6	7	6	6	6	6	6	7	7	7	6	7	6	6	6	6	6	7	7	7	58.2	58.2	58.2	24.061	232	232	0	73.181	By MS/MS	By MS/MS
MSMEG_6698|MSMEG_6698|IS1096,;MSMEG_2338|MSMEG_2338|IS1096,;MSMEG_1058|MSMEG_1058|IS1096,;MSMEG_6463|MSMEG_6463|IS1096,;MSMEG_6162|MSMEG_6162|IS1096,;MSMEG_6156|MSMEG_6156|IS1096,;MSMEG_6149|MSMEG_6149|IS1096,;MSMEG_5379|MSMEG_5379|IS1096,;MSMEG_5093|MSMEG_5093|IS1096,;MSMEG_4946|MSMEG_4946|IS1096,;MSMEG_4927|MSMEG_4927|IS1096,;MSMEG_4791|MSMEG_4791|IS1096,;MSMEG_4402|MSMEG_4402|IS1096,;MSMEG_369…	MSMEG_6698|MSMEG_6698|IS1096,;MSMEG_2338|MSMEG_2338|IS1096,;MSMEG_1058|MSMEG_1058|IS1096,;MSMEG_6463|MSMEG_6463|IS1096,;MSMEG_6162|MSMEG_6162|IS1096,;MSMEG_6156|MSMEG_6156|IS1096,;MSMEG_6149|MSMEG_6149|IS1096,;MSMEG_5379|MSMEG_5379|IS1096,;MSMEG_5093|MSMEG_5093|IS1096,;MSMEG_4946|MSMEG_4946|IS1096,;MSMEG_4927|MSMEG_4927|IS1096,;MSMEG_4791|MSMEG_4791|IS1096,;MSMEG_4402|MSMEG_4402|IS1096,;MSMEG_369…	2;2;2;2;2;2;2;2;2;2;2;2;2;2;2;2;2;2;2;2;2;2;2;2	2;2;2;2;2;2;2;2;2;2;2;2;2;2;2;2;2;2;2;2;2;2;2;2	2;2;2;2;2;2;2;2;2;2;2;2;2;2;2;2;2;2;2;2;2;2;2;2	MSMEG_6698|MSMEG_6698|IS1096, tnpR protein|208 AA;MSMEG_2338|MSMEG_2338|IS1096, tnpR protein|208 AA;MSMEG_1058|MSMEG_1058|IS1096, tnpR protein|208 AA;MSMEG_6463|MSMEG_6463|IS1096, tnpR protein|233 AA;MSMEG_6162|MSMEG_6162|IS1096, tnpR protein|233 AA;MSMEG_	24	2	2	2	2	2	2	1	2	2	1	2	2	2	2	2	2	1	2	2	1	2	2	2	2	2	2	1	2	2	1	2	2	2	13.5	13.5	13.5	23.396	208	208;208;208;233;233;233;233;233;233;233;233;233;233;233;233;233;233;233;233;233;233;233;233;233	0	25.886	By matching	By MS/MS
MSMEG_0209|MSMEG_0209|ribonuclease	MSMEG_0209|MSMEG_0209|ribonuclease	2	2	2	MSMEG_0209|MSMEG_0209|ribonuclease inhibitor|92 AA	1	2	2	2	0	0	1	2	1	1	1	1	2	2	0	0	1	2	1	1	1	1	2	2	0	0	1	2	1	1	1	1	2	2	35.9	35.9	35.9	9.976	92	92	0	10.668
MSMEG_0212|MSMEG_0212|lyase|139	MSMEG_0212|MSMEG_0212|lyase|139	5	5	5	MSMEG_0212|MSMEG_0212|lyase|139 AA	1	5	5	5	3	5	4	4	4	5	4	5	5	4	3	5	4	4	4	5	4	5	5	4	3	5	4	4	4	5	4	5	5	4	65.5	65.5	65.5	15.3	139	139	0	148.55	By MS/MS	By MS/MS
MSMEG_0215|MSMEG_0215|YhhW	MSMEG_0215|MSMEG_0215|YhhW	4	4	4	MSMEG_0215|MSMEG_0215|YhhW family protein|238 AA	1	4	4	4	3	3	3	4	3	4	3	4	4	4	3	3	3	4	3	4	3	4	4	4	3	3	3	4	3	4	3	4	4	4	30.7	30.7	30.7	25.529	238	238	0	8.282	By matching	By MS/MS
MSMEG_0216|MSMEG_0216|3-hydroxyacyl-CoA	MSMEG_0216|MSMEG_0216|3-hydroxyacyl-CoA	11	11	11	MSMEG_0216|MSMEG_0216|3-hydroxyacyl-CoA dehydrogenase|264 AA	1	11	11	11	9	11	11	11	11	11	10	11	11	11	9	11	11	11	11	11	10	11	11	11	9	11	11	11	11	11	10	11	11	11	57.6	57.6	57.6	27.026	264	264	0	232.69	By MS/MS	By MS/MS
MSMEG_0219|MSMEG_0219|RNA	MSMEG_0219|MSMEG_0219|RNA	2	2	2	MSMEG_0219|MSMEG_0219|RNA polymerase sigma-70 factor, family protein|340 AA	1	2	2	2	2	2	1	1	2	2	0	0	0	2	2	2	1	1	2	2	0	0	0	2	2	2	1	1	2	2	0	0	0	2	9.1	9.1	9.1	37.811	340	340	0	5.4403	By MS/MS	By MS/MS
MSMEG_0221|MSMEG_0221|secreted	MSMEG_0221|MSMEG_0221|secreted	4	4	4	MSMEG_0221|MSMEG_0221|secreted protein|319 AA	1	4	4	4	3	2	4	3	4	3	3	3	4	3	3	2	4	3	4	3	3	3	4	3	3	2	4	3	4	3	3	3	4	3	21.6	21.6	21.6	33.584	319	319	0	15.815	By MS/MS	By MS/MS
MSMEG_0224|MSMEG_0224|O-methyltransferase	MSMEG_0224|MSMEG_0224|O-methyltransferase	8	8	8	MSMEG_0224|MSMEG_0224|O-methyltransferase MdmC|218 AA	1	8	8	8	7	8	8	6	6	7	8	8	7	8	7	8	8	6	6	7	8	8	7	8	7	8	8	6	6	7	8	8	7	8	51.4	51.4	51.4	23.136	218	218	0	72.38	By MS/MS	By MS/MS
MSMEG_0225|MSMEG_0225|MmpL4	MSMEG_0225|MSMEG_0225|MmpL4	1	1	1	MSMEG_0225|MSMEG_0225|MmpL4 protein|965 AA	1	1	1	1	0	0	0	1	1	1	0	0	0	0	0	0	0	1	1	1	0	0	0	0	0	0	0	1	1	1	0	0	0	0	1	1	1	105.53	965	965	0.0018273	2.4713
MSMEG_0226|MSMEG_0226|MmpS5	MSMEG_0226|MSMEG_0226|MmpS5	2	1	1	MSMEG_0226|MSMEG_0226|MmpS5 protein|142 AA	1	2	1	1	1	2	2	2	1	1	0	1	2	1	0	1	1	1	0	0	0	0	1	0	0	1	1	1	0	0	0	0	1	0	29.6	19	19	15.409	142	142	0	3.4087	By matching	By MS/MS
MSMEG_0229|ilvD|dihydroxy-acid	MSMEG_0229|ilvD|dihydroxy-acid	26	26	26	MSMEG_0229|ilvD|dihydroxy-acid dehydratase|571 AA	1	26	26	26	20	23	20	23	22	19	23	25	26	25	20	23	20	23	22	19	23	25	26	25	20	23	20	23	22	19	23	25	26	25	66.2	66.2	66.2	59.949	571	571	0	323.31	By MS/MS	By MS/MS
MSMEG_0230|MSMEG_0230|conserved	MSMEG_0230|MSMEG_0230|conserved	1	1	1	MSMEG_0230|MSMEG_0230|conserved hypothetical protein|101 AA	1	1	1	1	1	1	1	1	1	1	1	1	1	1	1	1	1	1	1	1	1	1	1	1	1	1	1	1	1	1	1	1	1	1	15.8	15.8	15.8	10.798	101	101	0	24.649	By MS/MS	By MS/MS
MSMEG_0231|MSMEG_0231|conserved	MSMEG_0231|MSMEG_0231|conserved	1	1	1	MSMEG_0231|MSMEG_0231|conserved hypothetical protein|99 AA	1	1	1	1	1	1	1	1	1	1	1	1	1	1	1	1	1	1	1	1	1	1	1	1	1	1	1	1	1	1	1	1	1	1	11.1	11.1	11.1	10.432	99	99	0	3.2631	By matching	By MS/MS
MSMEG_0233|MSMEG_0233|lipoprotein	MSMEG_0233|MSMEG_0233|lipoprotein	13	13	13	MSMEG_0233|MSMEG_0233|lipoprotein Lpps|346 AA	1	13	13	13	11	13	12	12	12	11	13	13	12	12	11	13	12	12	12	11	13	13	12	12	11	13	12	12	12	11	13	13	12	12	51.4	51.4	51.4	37.233	346	346	0	256.6	By MS/MS	By MS/MS
MSMEG_0234|MSMEG_0234|metallopeptidase|666	MSMEG_0234|MSMEG_0234|metallopeptidase|666	31	31	31	MSMEG_0234|MSMEG_0234|metallopeptidase|666 AA	1	31	31	31	20	27	24	29	26	24	25	27	30	30	20	27	24	29	26	24	25	27	30	30	20	27	24	29	26	24	25	27	30	30	61.4	61.4	61.4	74.129	666	666	0	323.31	By MS/MS	By MS/MS
MSMEG_0238|MSMEG_0238|O-acetylhomoserine/O-acetylserine	MSMEG_0238|MSMEG_0238|O-acetylhomoserine/O-acetylserine	7	7	7	MSMEG_0238|MSMEG_0238|O-acetylhomoserine/O-acetylserine sulfhydrylase|156 AA	1	7	7	7	4	6	5	7	7	7	5	6	6	6	4	6	5	7	7	7	5	6	6	6	4	6	5	7	7	7	5	6	6	6	66	66	66	17.43	156	156	0	93.613	By MS/MS	By MS/MS
MSMEG_0239|MSMEG_0239|O-acetylhomoserine/O-acetylserine	MSMEG_0239|MSMEG_0239|O-acetylhomoserine/O-acetylserine	12	12	12	MSMEG_0239|MSMEG_0239|O-acetylhomoserine/O-acetylserine sulfhydrylase|431 AA	1	12	12	12	8	12	10	11	10	11	10	10	10	12	8	12	10	11	10	11	10	10	10	12	8	12	10	11	10	11	10	10	10	12	49.2	49.2	49.2	45.383	431	431	0	119.85	By MS/MS	By MS/MS
MSMEG_0240|MSMEG_0240|conserved	MSMEG_0240|MSMEG_0240|conserved	4	4	4	MSMEG_0240|MSMEG_0240|conserved hypothetical protein|202 AA	1	4	4	4	3	1	3	2	3	3	1	3	3	3	3	1	3	2	3	3	1	3	3	3	3	1	3	2	3	3	1	3	3	3	25.7	25.7	25.7	22.663	202	202	0	61.433	By MS/MS	By matching
MSMEG_0242|MSMEG_0242|conserved	MSMEG_0242|MSMEG_0242|conserved	4	4	4	MSMEG_0242|MSMEG_0242|conserved hypothetical protein|193 AA	1	4	4	4	4	4	4	4	4	4	4	4	4	4	4	4	4	4	4	4	4	4	4	4	4	4	4	4	4	4	4	4	4	4	35.2	35.2	35.2	19.122	193	193	0	72.707	By MS/MS	By MS/MS
MSMEG_0243|MSMEG_0243|conserved	MSMEG_0243|MSMEG_0243|conserved	5	5	5	MSMEG_0243|MSMEG_0243|conserved hypothetical protein|116 AA	1	5	5	5	5	5	5	5	5	5	5	5	5	5	5	5	5	5	5	5	5	5	5	5	5	5	5	5	5	5	5	5	5	5	31	31	31	11.67	116	116	0	47.904	By MS/MS	By MS/MS
MSMEG_0250|MSMEG_0250|membrane	MSMEG_0250|MSMEG_0250|membrane	12	12	12	MSMEG_0250|MSMEG_0250|membrane protein, MmpL family protein|1013 AA	1	12	12	12	11	10	11	10	11	10	9	10	9	9	11	10	11	10	11	10	9	10	9	9	11	10	11	10	11	10	9	10	9	9	19.4	19.4	19.4	109.4	1013	1013	0	111.45	By MS/MS	By MS/MS
MSMEG_0251|MSMEG_0251|conserved	MSMEG_0251|MSMEG_0251|conserved	4	4	4	MSMEG_0251|MSMEG_0251|conserved hypothetical protein|232 AA	1	4	4	4	3	4	3	3	3	4	4	2	3	3	3	4	3	3	3	4	4	2	3	3	3	4	3	3	3	4	4	2	3	3	23.3	23.3	23.3	25.249	232	232	0	26.404	By MS/MS	By MS/MS
MSMEG_0252|trmB|tRNA	MSMEG_0252|trmB|tRNA	8	8	8	MSMEG_0252|trmB|tRNA (guanine-N(7)-)-methyltransferase|240 AA	1	8	8	8	7	8	8	6	7	8	8	7	7	7	7	8	8	6	7	8	8	7	7	7	7	8	8	6	7	8	8	7	7	7	52.9	52.9	52.9	26.532	240	240	0	153.63	By MS/MS	By MS/MS
MSMEG_0255|MSMEG_0255|phosphoenolpyruvate	MSMEG_0255|MSMEG_0255|phosphoenolpyruvate	31	31	31	MSMEG_0255|MSMEG_0255|phosphoenolpyruvate carboxykinase|608 AA	1	31	31	31	27	30	30	30	30	30	30	30	31	30	27	30	30	30	30	30	30	30	31	30	27	30	30	30	30	30	30	30	31	30	72.2	72.2	72.2	67.296	608	608	0	323.31	By MS/MS	By MS/MS
MSMEG_0257|MSMEG_0257|acyl-CoA	MSMEG_0257|MSMEG_0257|acyl-CoA	4	4	4	MSMEG_0257|MSMEG_0257|acyl-CoA synthase|504 AA	1	4	4	4	0	1	1	3	1	1	1	0	3	2	0	1	1	3	1	1	1	0	3	2	0	1	1	3	1	1	1	0	3	2	21	21	21	55.585	504	504	0	8.3058		By MS/MS
MSMEG_0261|MSMEG_0261|p40	MSMEG_0261|MSMEG_0261|p40	6	6	6	MSMEG_0261|MSMEG_0261|p40 protein|330 AA	1	6	6	6	4	4	4	5	6	6	3	5	6	5	4	4	4	5	6	6	3	5	6	5	4	4	4	5	6	6	3	5	6	5	21.5	21.5	21.5	35.043	330	330	0	20.742	By MS/MS	By matching
MSMEG_0269|MSMEG_0269|3-oxoacyl-[acyl-carrier-protein]	MSMEG_0269|MSMEG_0269|3-oxoacyl-[acyl-carrier-protein]	3	3	3	MSMEG_0269|MSMEG_0269|3-oxoacyl-[acyl-carrier-protein] reductase|259 AA	1	3	3	3	1	3	1	1	1	1	1	3	2	2	1	3	1	1	1	1	1	3	2	2	1	3	1	1	1	1	1	3	2	2	17	17	17	26.785	259	259	0	14.413	By matching	By MS/MS
MSMEG_0272|MSMEG_0272|propanediol	MSMEG_0272|MSMEG_0272|propanediol	4	4	4	MSMEG_0272|MSMEG_0272|propanediol utilization protein PduA|93 AA	1	4	4	4	2	2	3	3	2	2	3	2	2	2	2	2	3	3	2	2	3	2	2	2	2	2	3	3	2	2	3	2	2	2	62.4	62.4	62.4	9.2984	93	93	0	8.7598	By MS/MS	By MS/MS
MSMEG_0282|MSMEG_0282|conserved	MSMEG_0282|MSMEG_0282|conserved	4	4	4	MSMEG_0282|MSMEG_0282|conserved hypothetical protein|106 AA	1	4	4	4	3	3	4	2	3	3	3	3	4	3	3	3	4	2	3	3	3	3	4	3	3	3	4	2	3	3	3	3	4	3	73.6	73.6	73.6	11.567	106	106	0	23.061	By MS/MS	By MS/MS
MSMEG_0284|MSMEG_0284|ribosyldihydronicotinamide	MSMEG_0284|MSMEG_0284|ribosyldihydronicotinamide	4	4	4	MSMEG_0284|MSMEG_0284|ribosyldihydronicotinamide dehydrogenase (quinone)|264 AA	1	4	4	4	3	4	3	4	4	4	3	4	4	3	3	4	3	4	4	4	3	4	4	3	3	4	3	4	4	4	3	4	4	3	19.7	19.7	19.7	29.176	264	264	0	27.969	By MS/MS	By MS/MS
MSMEG_0291|MSMEG_0291|dioxygenase,	MSMEG_0291|MSMEG_0291|dioxygenase,	1	1	1	MSMEG_0291|MSMEG_0291|dioxygenase, TauD/TfdA family protein|281 AA	1	1	1	1	0	1	0	1	1	1	1	0	1	1	0	1	0	1	1	1	1	0	1	1	0	1	0	1	1	1	1	0	1	1	3.2	3.2	3.2	31.03	281	281	0.0013793	2.6549		By MS/MS
MSMEG_0301|MSMEG_0301|oxidoreductase,	MSMEG_0301|MSMEG_0301|oxidoreductase,	9	7	7	MSMEG_0301|MSMEG_0301|oxidoreductase, FAD-binding|455 AA	1	9	7	7	5	7	5	9	7	6	8	8	9	8	4	5	4	7	5	5	6	6	7	6	4	5	4	7	5	5	6	6	7	6	28.6	26.2	26.2	47.138	455	455	0	158.16	By MS/MS	By MS/MS
MSMEG_0306|MSMEG_0306|arylamine	MSMEG_0306|MSMEG_0306|arylamine	2	2	2	MSMEG_0306|MSMEG_0306|arylamine N-acetyltransferase|278 AA	1	2	2	2	0	0	0	1	0	0	1	1	1	2	0	0	0	1	0	0	1	1	1	2	0	0	0	1	0	0	1	1	1	2	18	18	18	30.433	278	278	0	5.2948
MSMEG_0309|MSMEG_0309|aldehyde	MSMEG_0309|MSMEG_0309|aldehyde	8	8	8	MSMEG_0309|MSMEG_0309|aldehyde dehydrogenase family protein|497 AA	1	8	8	8	6	5	5	5	7	7	7	5	5	6	6	5	5	5	7	7	7	5	5	6	6	5	5	5	7	7	7	5	5	6	29.2	29.2	29.2	52.36	497	497	0	42.3	By MS/MS	By MS/MS
MSMEG_0312|eda|2-dehydro-3-deoxyphosphogluconate	MSMEG_0312|eda|2-dehydro-3-deoxyphosphogluconate	9	9	9	MSMEG_0312|eda|2-dehydro-3-deoxyphosphogluconate aldolase/4-hydroxy-2-oxoglutarate aldolase|209 AA	1	9	9	9	6	7	7	6	7	6	7	5	8	8	6	7	7	6	7	6	7	5	8	8	6	7	7	6	7	6	7	5	8	8	85.2	85.2	85.2	21.495	209	209	0	42.661	By MS/MS	By MS/MS
MSMEG_0313|edd|phosphogluconate	MSMEG_0313|edd|phosphogluconate	12	12	12	MSMEG_0313|edd|phosphogluconate dehydratase|609 AA	1	12	12	12	8	8	10	11	7	7	8	10	8	9	8	8	10	11	7	7	8	10	8	9	8	8	10	11	7	7	8	10	8	9	23.3	23.3	23.3	63.314	609	609	0	125.76	By MS/MS	By MS/MS
MSMEG_0314|zwf|glucose-6-phosphate	MSMEG_0314|zwf|glucose-6-phosphate	11	10	10	MSMEG_0314|zwf|glucose-6-phosphate 1-dehydrogenase|495 AA	1	11	10	10	10	8	11	11	9	9	10	11	10	9	9	7	10	10	8	8	9	10	9	8	9	7	10	10	8	8	9	10	9	8	31.3	29.5	29.5	54.621	495	495	0	127.48	By MS/MS	By MS/MS
MSMEG_0317|MSMEG_0317|conserved	MSMEG_0317|MSMEG_0317|conserved	12	12	12	MSMEG_0317|MSMEG_0317|conserved hypothetical protein|398 AA	1	12	12	12	9	9	7	10	8	5	10	9	10	12	9	9	7	10	8	5	10	9	10	12	9	9	7	10	8	5	10	9	10	12	48.2	48.2	48.2	43.259	398	398	0	272.13	By MS/MS	By MS/MS
MSMEG_0320|MSMEG_0320|putative	MSMEG_0320|MSMEG_0320|putative	3	3	3	MSMEG_0320|MSMEG_0320|putative phosphotriesterase|325 AA	1	3	3	3	0	3	0	1	0	2	1	1	2	2	0	3	0	1	0	2	1	1	2	2	0	3	0	1	0	2	1	1	2	2	13.2	13.2	13.2	35.806	325	325	0	11.127		By MS/MS
MSMEG_0338|MSMEG_0338|acyl-CoA	MSMEG_0338|MSMEG_0338|acyl-CoA	2	2	2	MSMEG_0338|MSMEG_0338|acyl-CoA dehydrogenase fadE12|378 AA	1	2	2	2	2	2	2	2	1	2	1	1	2	2	2	2	2	2	1	2	1	1	2	2	2	2	2	2	1	2	1	1	2	2	6.3	6.3	6.3	40.629	378	378	0	3.0569	By matching	By MS/MS
MSMEG_0356|MSMEG_0356|acetyltransferase|98	MSMEG_0356|MSMEG_0356|acetyltransferase|98	3	3	3	MSMEG_0356|MSMEG_0356|acetyltransferase|98 AA	1	3	3	3	2	3	3	3	3	2	3	3	3	2	2	3	3	3	3	2	3	3	3	2	2	3	3	3	3	2	3	3	3	2	45.9	45.9	45.9	10.369	98	98	0	43.191	By MS/MS	By MS/MS
MSMEG_0358|MSMEG_0358|ribonucleoside-diphosphate	MSMEG_0358|MSMEG_0358|ribonucleoside-diphosphate	1	1	1	MSMEG_0358|MSMEG_0358|ribonucleoside-diphosphate reductase, beta subunit|320 AA	1	1	1	1	1	1	1	1	1	1	1	1	1	1	1	1	1	1	1	1	1	1	1	1	1	1	1	1	1	1	1	1	1	1	3.8	3.8	3.8	35.999	320	320	0.0004697	2.9215	By matching	By MS/MS
MSMEG_0361|MSMEG_0361|Glycosyl	MSMEG_0361|MSMEG_0361|Glycosyl	13	13	13	MSMEG_0361|MSMEG_0361|Glycosyl hydrolase family protein 3|387 AA	1	13	13	13	10	12	12	11	12	12	11	13	13	13	10	12	12	11	12	12	11	13	13	13	10	12	12	11	12	12	11	13	13	13	55.3	55.3	55.3	39.155	387	387	0	323.31	By MS/MS	By MS/MS
MSMEG_0362|MSMEG_0362|amidohydrolase	MSMEG_0362|MSMEG_0362|amidohydrolase	2	2	2	MSMEG_0362|MSMEG_0362|amidohydrolase 2|387 AA	1	2	2	2	1	1	1	2	0	1	2	2	1	1	1	1	1	2	0	1	2	2	1	1	1	1	1	2	0	1	2	2	1	1	8.8	8.8	8.8	41.775	387	387	0	5.054	By MS/MS	By MS/MS
MSMEG_0363|MSMEG_0363|TetR-family	MSMEG_0363|MSMEG_0363|TetR-family	2	2	2	MSMEG_0363|MSMEG_0363|TetR-family protein regulatory protein|212 AA	1	2	2	2	1	2	1	1	2	0	2	2	2	2	1	2	1	1	2	0	2	2	2	2	1	2	1	1	2	0	2	2	2	2	11.3	11.3	11.3	23.106	212	212	0	4.6378	By MS/MS	By MS/MS
MSMEG_0365|MSMEG_0365|conserved	MSMEG_0365|MSMEG_0365|conserved	9	9	9	MSMEG_0365|MSMEG_0365|conserved hypothetical protein|626 AA	1	9	9	9	8	9	7	6	6	6	9	6	6	5	8	9	7	6	6	6	9	6	6	5	8	9	7	6	6	6	9	6	6	5	22.4	22.4	22.4	66.276	626	626	0	32.105	By MS/MS	By MS/MS
MSMEG_0366|MSMEG_0366|hypothetical	MSMEG_0366|MSMEG_0366|hypothetical	7	7	7	MSMEG_0366|MSMEG_0366|hypothetical protein|175 AA	1	7	7	7	6	6	6	6	6	6	7	6	6	6	6	6	6	6	6	6	7	6	6	6	6	6	6	6	6	6	7	6	6	6	68	68	68	18.588	175	175	0	61.655	By MS/MS	By MS/MS
MSMEG_0368|MSMEG_0368|hypothetical	MSMEG_0368|MSMEG_0368|hypothetical	1	1	1	MSMEG_0368|MSMEG_0368|hypothetical protein|488 AA	1	1	1	1	1	0	0	1	1	1	1	1	1	1	1	0	0	1	1	1	1	1	1	1	1	0	0	1	1	1	1	1	1	1	3.1	3.1	3.1	53.711	488	488	0.0070734	1.9468	By matching
MSMEG_0369|MSMEG_0369|hypothetical	MSMEG_0369|MSMEG_0369|hypothetical	7	7	7	MSMEG_0369|MSMEG_0369|hypothetical protein|240 AA	1	7	7	7	4	5	4	4	5	4	6	5	5	6	4	5	4	4	5	4	6	5	5	6	4	5	4	4	5	4	6	5	5	6	44.2	44.2	44.2	27.673	240	240	0	58.51	By MS/MS	By MS/MS
MSMEG_0370|MSMEG_0370|conserved	MSMEG_0370|MSMEG_0370|conserved	2	2	2	MSMEG_0370|MSMEG_0370|conserved hypothetical protein|1118 AA	1	2	2	2	2	2	2	2	2	2	1	2	2	1	2	2	2	2	2	2	1	2	2	1	2	2	2	2	2	2	1	2	2	1	1.3	1.3	1.3	124.47	1118	1118	0.001829	2.5046	By MS/MS	By MS/MS
MSMEG_0371|MSMEG_0371|MaoC	MSMEG_0371|MSMEG_0371|MaoC	5	5	5	MSMEG_0371|MSMEG_0371|MaoC like domain protein|285 AA	1	5	5	5	4	4	5	3	5	4	5	3	3	4	4	4	5	3	5	4	5	3	3	4	4	4	5	3	5	4	5	3	3	4	22.8	22.8	22.8	30.825	285	285	0	9.3908	By MS/MS	By MS/MS
MSMEG_0372|MSMEG_0372|oxidoreductase,;MSMEG_4004|MSMEG_4004|3-oxoacyl-[acyl-carrier-protein]	MSMEG_0372|MSMEG_0372|oxidoreductase,	18;1	18;1	18;1	MSMEG_0372|MSMEG_0372|oxidoreductase, short chain dehydrogenase/reductase family protein|450 AA	2	18	18	18	14	16	12	16	14	15	17	15	16	16	14	16	12	16	14	15	17	15	16	16	14	16	12	16	14	15	17	15	16	16	66.2	66.2	66.2	46.498	450	450;249	0	323.31	By MS/MS	By MS/MS
MSMEG_0373|MSMEG_0373|3-ketoacyl-CoA	MSMEG_0373|MSMEG_0373|3-ketoacyl-CoA	11	11	11	MSMEG_0373|MSMEG_0373|3-ketoacyl-CoA thiolase|432 AA	1	11	11	11	5	8	6	8	8	6	5	8	9	9	5	8	6	8	8	6	5	8	9	9	5	8	6	8	8	6	5	8	9	9	55.3	55.3	55.3	45.233	432	432	0	128.82	By MS/MS	By MS/MS
MSMEG_0380|MSMEG_0380|MmpS4	MSMEG_0380|MSMEG_0380|MmpS4	5	5	5	MSMEG_0380|MSMEG_0380|MmpS4 protein|139 AA	1	5	5	5	3	4	3	4	4	4	4	5	4	5	3	4	3	4	4	4	4	5	4	5	3	4	3	4	4	4	4	5	4	5	59.7	59.7	59.7	15.18	139	139	0	111.98	By MS/MS	By MS/MS
MSMEG_0381|mmpl4a|Mmp14a	MSMEG_0381|mmpl4a|Mmp14a	6	6	6	MSMEG_0381|mmpl4a|Mmp14a protein|960 AA	1	6	6	6	3	4	4	4	4	5	4	5	4	5	3	4	4	4	4	5	4	5	4	5	3	4	4	4	4	5	4	5	4	5	10	10	10	104.36	960	960	0	19.85	By MS/MS	By MS/MS
MSMEG_0382|mmpL4b|putative	MSMEG_0382|mmpL4b|putative	4	4	4	MSMEG_0382|mmpL4b|putative transport protein|994 AA	1	4	4	4	1	2	2	2	2	1	2	0	2	2	1	2	2	2	2	1	2	0	2	2	1	2	2	2	2	1	2	0	2	2	6.6	6.6	6.6	107.59	994	994	0	8.6829	By matching	By matching
MSMEG_0383|MSMEG_0383|conserved	MSMEG_0383|MSMEG_0383|conserved	4	4	4	MSMEG_0383|MSMEG_0383|conserved hypothetical protein|112 AA	1	4	4	4	3	4	4	4	3	3	3	4	4	3	3	4	4	4	3	3	3	4	4	3	3	4	4	4	3	3	3	4	4	3	42.9	42.9	42.9	12.086	112	112	0	6.7441	By MS/MS	By MS/MS
MSMEG_0384|rfbA|glucose-1-phosphate;MSMEG_5983|rfbA|glucose-1-phosphate	MSMEG_0384|rfbA|glucose-1-phosphate	3;1	3;1	3;1	MSMEG_0384|rfbA|glucose-1-phosphate thymidylyltransferase|288 AA	2	3	3	3	2	2	1	3	1	1	2	1	2	1	2	2	1	3	1	1	2	1	2	1	2	2	1	3	1	1	2	1	2	1	12.2	12.2	12.2	31.353	288	288;292	0	5.849	By MS/MS	By matching
MSMEG_0386|MSMEG_0386|NAD	MSMEG_0386|MSMEG_0386|NAD	16	16	16	MSMEG_0386|MSMEG_0386|NAD dependent epimerase/dehydratase family protein|377 AA	1	16	16	16	11	15	12	11	13	12	14	14	12	14	11	15	12	11	13	12	14	14	12	14	11	15	12	11	13	12	14	14	12	14	65.5	65.5	65.5	41.085	377	377	0	172.07	By MS/MS	By MS/MS
MSMEG_0387|MSMEG_0387|Rmt2	MSMEG_0387|MSMEG_0387|Rmt2	1	1	1	MSMEG_0387|MSMEG_0387|Rmt2 protein|244 AA	1	1	1	1	1	0	0	0	0	0	0	0	0	0	1	0	0	0	0	0	0	0	0	0	1	0	0	0	0	0	0	0	0	0	7.4	7.4	7.4	28.048	244	244	0	3.4369	By MS/MS
MSMEG_0388|tylF|Macrocin-O-methyltransferase|240	MSMEG_0388|tylF|Macrocin-O-methyltransferase|240	5	5	5	MSMEG_0388|tylF|Macrocin-O-methyltransferase|240 AA	1	5	5	5	3	5	3	4	5	4	4	3	4	4	3	5	3	4	5	4	4	3	4	4	3	5	3	4	5	4	4	3	4	4	30	30	30	26.99	240	240	0	44.457	By MS/MS	By MS/MS
MSMEG_0391|MSMEG_0391|Rmt3	MSMEG_0391|MSMEG_0391|Rmt3	3	3	3	MSMEG_0391|MSMEG_0391|Rmt3 protein|262 AA	1	3	3	3	1	1	2	3	3	3	1	3	3	3	1	1	2	3	3	3	1	3	3	3	1	1	2	3	3	3	1	3	3	3	11.1	11.1	11.1	29.474	262	262	0	10.018	By MS/MS	By matching
MSMEG_0394|MSMEG_0394|hypothetical	MSMEG_0394|MSMEG_0394|hypothetical	4	4	4	MSMEG_0394|MSMEG_0394|hypothetical protein|84 AA	1	4	4	4	3	4	2	4	3	4	3	3	4	3	3	4	2	4	3	4	3	3	4	3	3	4	2	4	3	4	3	3	4	3	57.1	57.1	57.1	9.1947	84	84	0	18.686	By MS/MS	By MS/MS
MSMEG_0399|MSMEG_0399|conserved	MSMEG_0399|MSMEG_0399|conserved	2	2	2	MSMEG_0399|MSMEG_0399|conserved domain protein|76 AA	1	2	2	2	1	2	2	2	2	2	2	2	2	2	1	2	2	2	2	2	2	2	2	2	1	2	2	2	2	2	2	2	2	2	32.9	32.9	32.9	8.5713	76	76	0	3.4416	By MS/MS	By matching
MSMEG_0400|MSMEG_0400|peptide	MSMEG_0400|MSMEG_0400|peptide	46	46	44	MSMEG_0400|MSMEG_0400|peptide synthetase|2429 AA	1	46	46	44	28	37	33	40	37	34	31	38	41	36	28	37	33	40	37	34	31	38	41	36	27	36	32	38	35	32	30	36	39	34	32.6	32.6	31.6	261.02	2429	2429	0	210.55	By MS/MS	By MS/MS
MSMEG_0401|MSMEG_0401|putative	MSMEG_0401|MSMEG_0401|putative	15	15	15	MSMEG_0401|MSMEG_0401|putative non-ribosomal peptide synthase|1001 AA	1	15	15	15	12	14	13	14	14	14	13	14	15	14	12	14	13	14	14	14	13	14	15	14	12	14	13	14	14	14	13	14	15	14	22.8	22.8	22.8	108.31	1001	1001	0	165.89	By MS/MS	By MS/MS
MSMEG_0402|MSMEG_0402|linear	MSMEG_0402|MSMEG_0402|linear	37	36	36	MSMEG_0402|MSMEG_0402|linear gramicidin synthetase subunit D|2559 AA	1	37	36	36	20	20	20	31	23	25	21	27	28	27	19	19	19	30	22	24	20	26	27	26	19	19	19	30	22	24	20	26	27	26	24.9	24.4	24.4	276.82	2559	2559	0	199.76	By MS/MS	By MS/MS
MSMEG_0404|MSMEG_0404|sigma	MSMEG_0404|MSMEG_0404|sigma	4	4	4	MSMEG_0404|MSMEG_0404|sigma associated protein|136 AA	1	4	4	4	2	3	3	3	2	1	4	3	4	3	2	3	3	3	2	1	4	3	4	3	2	3	3	3	2	1	4	3	4	3	60.3	60.3	60.3	14.762	136	136	0	13.646	By matching	By MS/MS
MSMEG_0406|MSMEG_0406|acyl-coA-dehydrogenase|611	MSMEG_0406|MSMEG_0406|acyl-coA-dehydrogenase|611	28	28	28	MSMEG_0406|MSMEG_0406|acyl-coA-dehydrogenase|611 AA	1	28	28	28	20	27	23	25	22	24	24	27	27	27	20	27	23	25	22	24	24	27	27	27	20	27	23	25	22	24	24	27	27	27	57.6	57.6	57.6	66.531	611	611	0	323.31	By MS/MS	By MS/MS
MSMEG_0408|MSMEG_0408|type	MSMEG_0408|MSMEG_0408|type	6	6	6	MSMEG_0408|MSMEG_0408|type I modular polyketide synthase|3652 AA	1	6	6	6	2	0	1	2	1	1	2	0	2	5	2	0	1	2	1	1	2	0	2	5	2	0	1	2	1	1	2	0	2	5	2.7	2.7	2.7	389.86	3652	3652	0	13.671	By matching
MSMEG_0409|MSMEG_0409|Condensation	MSMEG_0409|MSMEG_0409|Condensation	3	3	3	MSMEG_0409|MSMEG_0409|Condensation domain protein|473 AA	1	3	3	3	3	2	2	2	3	2	2	2	3	2	3	2	2	2	3	2	2	2	3	2	3	2	2	2	3	2	2	2	3	2	7.4	7.4	7.4	51.736	473	473	0	4.6887	By MS/MS	By MS/MS
MSMEG_0410|MSMEG_0410|MmpL	MSMEG_0410|MSMEG_0410|MmpL	1	1	1	MSMEG_0410|MSMEG_0410|MmpL protein|1002 AA	1	1	1	1	1	1	1	1	1	1	0	1	1	1	1	1	1	1	1	1	0	1	1	1	1	1	1	1	1	1	0	1	1	1	1.1	1.1	1.1	106.43	1002	1002	0.0036166	2.2936	By matching	By MS/MS
MSMEG_0412|MSMEG_0412|conserved	MSMEG_0412|MSMEG_0412|conserved	6	6	6	MSMEG_0412|MSMEG_0412|conserved hypothetical protein|383 AA	1	6	6	6	4	5	4	4	2	4	3	2	3	3	4	5	4	4	2	4	3	2	3	3	4	5	4	4	2	4	3	2	3	3	29.2	29.2	29.2	40.192	383	383	0	18.682	By MS/MS	By MS/MS
MSMEG_0415|MSMEG_0415|NADH-fmn	MSMEG_0415|MSMEG_0415|NADH-fmn	3	3	3	MSMEG_0415|MSMEG_0415|NADH-fmn oxidoreductase|161 AA	1	3	3	3	3	3	3	3	2	3	3	3	3	3	3	3	3	3	2	3	3	3	3	3	3	3	3	3	2	3	3	3	3	3	23	23	23	16.892	161	161	0	6.813	By MS/MS	By MS/MS
MSMEG_0416|MSMEG_0416|hypothetical	MSMEG_0416|MSMEG_0416|hypothetical	1	1	1	MSMEG_0416|MSMEG_0416|hypothetical protein|53 AA	1	1	1	1	1	1	1	1	1	1	1	1	1	1	1	1	1	1	1	1	1	1	1	1	1	1	1	1	1	1	1	1	1	1	18.9	18.9	18.9	6.0798	53	53	0	33.353	By MS/MS	By MS/MS
MSMEG_0418|MSMEG_0418|succinate	MSMEG_0418|MSMEG_0418|succinate	5	5	5	MSMEG_0418|MSMEG_0418|succinate dehydrogenase flavoprotein subunit|635 AA	1	5	5	5	3	5	3	4	5	5	3	2	4	5	3	5	3	4	5	5	3	2	4	5	3	5	3	4	5	5	3	2	4	5	7.4	7.4	7.4	70.055	635	635	0	16.862	By matching	By MS/MS
MSMEG_0422|MSMEG_0422|transferase|255	MSMEG_0422|MSMEG_0422|transferase|255	10	10	10	MSMEG_0422|MSMEG_0422|transferase|255 AA	1	10	10	10	7	9	8	9	9	8	8	9	9	10	7	9	8	9	9	8	8	9	9	10	7	9	8	9	9	8	8	9	9	10	61.6	61.6	61.6	26.693	255	255	0	86.119	By MS/MS	By MS/MS
MSMEG_0423|MSMEG_0423|conserved	MSMEG_0423|MSMEG_0423|conserved	2	2	2	MSMEG_0423|MSMEG_0423|conserved hypothetical protein|166 AA	1	2	2	2	2	2	2	1	1	1	2	1	1	1	2	2	2	1	1	1	2	1	1	1	2	2	2	1	1	1	2	1	1	1	18.7	18.7	18.7	16.94	166	166	0	15.498	By MS/MS	By MS/MS
MSMEG_0435|MSMEG_0435|allophanate	MSMEG_0435|MSMEG_0435|allophanate	4	4	4	MSMEG_0435|MSMEG_0435|allophanate hydrolase subunit 2|294 AA	1	4	4	4	3	4	2	4	3	3	2	3	3	3	3	4	2	4	3	3	2	3	3	3	3	4	2	4	3	3	2	3	3	3	13.9	13.9	13.9	31.247	294	294	0	8.7854	By matching	By MS/MS
MSMEG_0436|MSMEG_0436|allophanate	MSMEG_0436|MSMEG_0436|allophanate	3	3	3	MSMEG_0436|MSMEG_0436|allophanate hydrolase subunit 1|210 AA	1	3	3	3	0	2	0	3	2	2	2	1	3	2	0	2	0	3	2	2	2	1	3	2	0	2	0	3	2	2	2	1	3	2	25.7	25.7	25.7	22.636	210	210	0	18.362		By MS/MS
MSMEG_0441|MSMEG_0441|conserved	MSMEG_0441|MSMEG_0441|conserved	9	9	9	MSMEG_0441|MSMEG_0441|conserved hypothetical protein, putative|242 AA	1	9	9	9	4	9	8	8	8	8	4	9	9	7	4	9	8	8	8	8	4	9	9	7	4	9	8	8	8	8	4	9	9	7	65.3	65.3	65.3	26.511	242	242	0	46.958	By MS/MS	By MS/MS
MSMEG_0443|MSMEG_0443|hydrolase,	MSMEG_0443|MSMEG_0443|hydrolase,	2	2	2	MSMEG_0443|MSMEG_0443|hydrolase, carbon-nitrogen family protein|330 AA	1	2	2	2	2	2	1	2	1	2	2	2	2	2	2	2	1	2	1	2	2	2	2	2	2	2	1	2	1	2	2	2	2	2	11.2	11.2	11.2	35.523	330	330	0	5.953	By MS/MS	By matching
MSMEG_0445|MSMEG_0445|amidohydrolase	MSMEG_0445|MSMEG_0445|amidohydrolase	9	9	9	MSMEG_0445|MSMEG_0445|amidohydrolase family protein|545 AA	1	9	9	9	4	5	4	8	6	4	6	7	7	6	4	5	4	8	6	4	6	7	7	6	4	5	4	8	6	4	6	7	7	6	29.9	29.9	29.9	58.294	545	545	0	62.427	By MS/MS	By MS/MS
MSMEG_0447|MSMEG_0447|conserved	MSMEG_0447|MSMEG_0447|conserved	4	4	4	MSMEG_0447|MSMEG_0447|conserved hypothetical protein|139 AA	1	4	4	4	3	3	4	4	3	4	3	4	4	4	3	3	4	4	3	4	3	4	4	4	3	3	4	4	3	4	3	4	4	4	52.5	52.5	52.5	14.408	139	139	0	94.13	By MS/MS	By MS/MS
MSMEG_0451|MSMEG_0451|oxidoreductase,	MSMEG_0451|MSMEG_0451|oxidoreductase,	5	5	5	MSMEG_0451|MSMEG_0451|oxidoreductase, FAD-linked|82 AA	1	5	5	5	4	5	5	5	5	5	5	5	5	5	4	5	5	5	5	5	5	5	5	5	4	5	5	5	5	5	5	5	5	5	82.9	82.9	82.9	8.7304	82	82	0	96.439	By MS/MS	By MS/MS
MSMEG_0454|MSMEG_0454|GntR-family	MSMEG_0454|MSMEG_0454|GntR-family	1	1	1	MSMEG_0454|MSMEG_0454|GntR-family protein transcriptional regulator|244 AA	1	1	1	1	1	1	1	1	1	1	1	1	1	1	1	1	1	1	1	1	1	1	1	1	1	1	1	1	1	1	1	1	1	1	5.3	5.3	5.3	26.028	244	244	0	4.1141	By MS/MS	By matching
MSMEG_0455|MSMEG_0455|aldehyde	MSMEG_0455|MSMEG_0455|aldehyde	5	5	5	MSMEG_0455|MSMEG_0455|aldehyde dehydrogenase|475 AA	1	5	5	5	4	4	5	4	3	4	4	3	3	2	4	4	5	4	3	4	4	3	3	2	4	4	5	4	3	4	4	3	3	2	15.8	15.8	15.8	50.105	475	475	0	77.34	By MS/MS	By MS/MS
MSMEG_0456|MSMEG_0456|DNA	MSMEG_0456|MSMEG_0456|DNA	6	6	6	MSMEG_0456|MSMEG_0456|DNA gyrase subunit A|713 AA	1	6	6	6	3	4	5	5	4	4	3	4	5	6	3	4	5	5	4	4	3	4	5	6	3	4	5	5	4	4	3	4	5	6	14.3	14.3	14.3	77.224	713	713	0	44.096	By MS/MS	By MS/MS
MSMEG_0457|MSMEG_0457|DNA	MSMEG_0457|MSMEG_0457|DNA	8	8	8	MSMEG_0457|MSMEG_0457|DNA topoisomerase IV subunit B|677 AA	1	8	8	8	7	5	5	5	6	5	5	7	6	7	7	5	5	5	6	5	5	7	6	7	7	5	5	5	6	5	5	7	6	7	18.2	18.2	18.2	72.089	677	677	0	52.533	By MS/MS	By MS/MS
MSMEG_0464|MSMEG_0464|phosphomethylpyrimidine	MSMEG_0464|MSMEG_0464|phosphomethylpyrimidine	15	15	15	MSMEG_0464|MSMEG_0464|phosphomethylpyrimidine kinase|268 AA	1	15	15	15	12	14	15	14	15	13	13	15	14	15	12	14	15	14	15	13	13	15	14	15	12	14	15	14	15	13	13	15	14	15	76.9	76.9	76.9	27.975	268	268	0	169.55	By MS/MS	By MS/MS
MSMEG_0466|MSMEG_0466|hypothetical	MSMEG_0466|MSMEG_0466|hypothetical	2	2	2	MSMEG_0466|MSMEG_0466|hypothetical protein|282 AA	1	2	2	2	0	0	1	1	1	1	0	0	2	1	0	0	1	1	1	1	0	0	2	1	0	0	1	1	1	1	0	0	2	1	11	11	11	31.133	282	282	0	6.919
MSMEG_0472|MSMEG_0472|putative	MSMEG_0472|MSMEG_0472|putative	2	2	2	MSMEG_0472|MSMEG_0472|putative lipoprotein|261 AA	1	2	2	2	2	2	2	2	1	2	1	2	2	2	2	2	2	2	1	2	1	2	2	2	2	2	2	2	1	2	1	2	2	2	13.8	13.8	13.8	25.694	261	261	0	32.725	By MS/MS	By MS/MS
MSMEG_0480|MSMEG_0480|transcriptional	MSMEG_0480|MSMEG_0480|transcriptional	5	5	5	MSMEG_0480|MSMEG_0480|transcriptional regulator, GntR family protein|219 AA	1	5	5	5	3	2	2	2	3	3	4	4	3	2	3	2	2	2	3	3	4	4	3	2	3	2	2	2	3	3	4	4	3	2	25.1	25.1	25.1	24.164	219	219	0	8.2243	By MS/MS	By MS/MS
MSMEG_0484|MSMEG_0484|formamidase|369	MSMEG_0484|MSMEG_0484|formamidase|369	5	5	5	MSMEG_0484|MSMEG_0484|formamidase|369 AA	1	5	5	5	2	2	2	4	3	3	3	2	3	4	2	2	2	4	3	3	3	2	3	4	2	2	2	4	3	3	3	2	3	4	20.3	20.3	20.3	39.217	369	369	0	7.0405	By matching	By MS/MS
MSMEG_0491|MSMEG_0491|transcriptional	MSMEG_0491|MSMEG_0491|transcriptional	1	1	1	MSMEG_0491|MSMEG_0491|transcriptional regulator, LacI family protein|342 AA	1	1	1	1	1	1	1	1	1	1	1	1	1	1	1	1	1	1	1	1	1	1	1	1	1	1	1	1	1	1	1	1	1	1	5	5	5	35.759	342	342	0	11.179	By MS/MS	By MS/MS
MSMEG_0501|MSMEG_0501|glucosamine-6-phosphate	MSMEG_0501|MSMEG_0501|glucosamine-6-phosphate	2	2	2	MSMEG_0501|MSMEG_0501|glucosamine-6-phosphate deaminase 1|248 AA	1	2	2	2	0	0	1	1	2	0	1	1	2	1	0	0	1	1	2	0	1	1	2	1	0	0	1	1	2	0	1	1	2	1	10.1	10.1	10.1	26.32	248	248	0	3.2201
MSMEG_0502|MSMEG_0502|glucosidase|458	MSMEG_0502|MSMEG_0502|glucosidase|458	1	1	1	MSMEG_0502|MSMEG_0502|glucosidase|458 AA	1	1	1	1	1	0	1	1	1	1	1	1	1	1	1	0	1	1	1	1	1	1	1	1	1	0	1	1	1	1	1	1	1	1	3.1	3.1	3.1	49.735	458	458	0	8.4183	By matching
MSMEG_0505|MSMEG_0505|probable	MSMEG_0505|MSMEG_0505|probable	3	3	3	MSMEG_0505|MSMEG_0505|probable sugar ABC transporter, substrate-binding protein, putative|456 AA	1	3	3	3	3	3	2	3	2	3	2	3	3	3	3	3	2	3	2	3	2	3	3	3	3	3	2	3	2	3	2	3	3	3	10.7	10.7	10.7	48.11	456	456	0	16.848	By MS/MS	By matching
MSMEG_0965|MSMEG_0965|porin|211;MSMEG_5483|MSMEG_5483|porin|215;MSMEG_0520|MSMEG_0520|porin|215	MSMEG_0965|MSMEG_0965|porin|211;MSMEG_5483|MSMEG_5483|porin|215;MSMEG_0520|MSMEG_0520|porin|215	3;3;3	3;3;3	1;1;1	MSMEG_0965|MSMEG_0965|porin|211 AA;MSMEG_5483|MSMEG_5483|porin|215 AA;MSMEG_0520|MSMEG_0520|porin|215 AA	3	3	3	1	2	3	3	3	3	3	3	3	3	3	2	3	3	3	3	3	3	3	3	3	0	1	1	1	1	1	1	1	1	1	21.3	21.3	9	22.118	211	211;215;215	0	134.16	By MS/MS	By MS/MS
MSMEG_0530|MSMEG_0530|short	MSMEG_0530|MSMEG_0530|short	2	2	2	MSMEG_0530|MSMEG_0530|short chain dehydrogenase|233 AA	1	2	2	2	2	2	2	2	2	1	1	2	1	1	2	2	2	2	2	1	1	2	1	1	2	2	2	2	2	1	1	2	1	1	13.3	13.3	13.3	24.857	233	233	0	4.0142	By matching	By MS/MS
MSMEG_0531|MSMEG_0531|putative	MSMEG_0531|MSMEG_0531|putative	17	17	17	MSMEG_0531|MSMEG_0531|putative acyl-CoA dehydrogenase|403 AA	1	17	17	17	9	16	14	14	15	12	14	15	15	16	9	16	14	14	15	12	14	15	15	16	9	16	14	14	15	12	14	15	15	16	59.6	59.6	59.6	43.892	403	403	0	225.27	By MS/MS	By MS/MS
MSMEG_0532|MSMEG_0532|transcriptional	MSMEG_0532|MSMEG_0532|transcriptional	5	5	5	MSMEG_0532|MSMEG_0532|transcriptional regulator, TetR family protein|205 AA	1	5	5	5	4	4	5	4	3	3	5	4	4	4	4	4	5	4	3	3	5	4	4	4	4	4	5	4	3	3	5	4	4	4	36.6	36.6	36.6	22.532	205	205	0	24.874	By MS/MS	By MS/MS
MSMEG_0535|MSMEG_0535|GntR-family	MSMEG_0535|MSMEG_0535|GntR-family	3	3	3	MSMEG_0535|MSMEG_0535|GntR-family protein transcriptional regulator|212 AA	1	3	3	3	1	1	0	2	1	2	2	1	3	2	1	1	0	2	1	2	2	1	3	2	1	1	0	2	1	2	2	1	3	2	19.3	19.3	19.3	23.531	212	212	0	5.2809	By MS/MS	By matching
MSMEG_0536|MSMEG_0536|intracellular	MSMEG_0536|MSMEG_0536|intracellular	12	12	12	MSMEG_0536|MSMEG_0536|intracellular protease, PfpI family protein|188 AA	1	12	12	12	8	12	8	10	10	11	10	11	11	11	8	12	8	10	10	11	10	11	11	11	8	12	8	10	10	11	10	11	11	11	68.1	68.1	68.1	20.037	188	188	0	157.02	By MS/MS	By MS/MS
MSMEG_0539|MSMEG_0539|transcriptional	MSMEG_0539|MSMEG_0539|transcriptional	2	2	2	MSMEG_0539|MSMEG_0539|transcriptional regulator, Crp/Fnr family protein|224 AA	1	2	2	2	2	2	2	2	2	2	2	2	2	2	2	2	2	2	2	2	2	2	2	2	2	2	2	2	2	2	2	2	2	2	18.8	18.8	18.8	24.858	224	224	0	16.316	By MS/MS	By MS/MS
MSMEG_0542|MSMEG_0542|antar	MSMEG_0542|MSMEG_0542|antar	2	2	2	MSMEG_0542|MSMEG_0542|antar domain protein|234 AA	1	2	2	2	1	0	1	1	1	1	1	2	1	1	1	0	1	1	1	1	1	2	1	1	1	0	1	1	1	1	1	2	1	1	10.7	10.7	10.7	26.099	234	234	0	13.133	By MS/MS
MSMEG_0550|MSMEG_0550|sulfonate	MSMEG_0550|MSMEG_0550|sulfonate	13	13	13	MSMEG_0550|MSMEG_0550|sulfonate binding protein|322 AA	1	13	13	13	13	13	13	13	13	13	13	13	13	13	13	13	13	13	13	13	13	13	13	13	13	13	13	13	13	13	13	13	13	13	63.7	63.7	63.7	34.503	322	322	0	323.31	By MS/MS	By MS/MS
MSMEG_0551|MSMEG_0551|ABC	MSMEG_0551|MSMEG_0551|ABC	4	4	4	MSMEG_0551|MSMEG_0551|ABC nitrate/sulfonate/bicarbonate transporter, ATPase subunit|260 AA	1	4	4	4	1	1	1	4	2	1	1	3	4	4	1	1	1	4	2	1	1	3	4	4	1	1	1	4	2	1	1	3	4	4	26.9	26.9	26.9	28.225	260	260	0	21.041	By MS/MS	By MS/MS
MSMEG_0552|MSMEG_0552|conserved	MSMEG_0552|MSMEG_0552|conserved	2	2	2	MSMEG_0552|MSMEG_0552|conserved hypothetical protein|164 AA	1	2	2	2	0	1	0	1	1	1	1	2	1	1	0	1	0	1	1	1	1	2	1	1	0	1	0	1	1	1	1	2	1	1	18.9	18.9	18.9	17.737	164	164	0	3.5371		By matching
MSMEG_0557|MSMEG_0557|hypothetical	MSMEG_0557|MSMEG_0557|hypothetical	2	2	2	MSMEG_0557|MSMEG_0557|hypothetical protein|45 AA	1	2	2	2	1	1	1	1	1	1	1	2	1	2	1	1	1	1	1	1	1	2	1	2	1	1	1	1	1	1	1	2	1	2	66.7	66.7	66.7	5.1847	45	45	0.0066726	2.0185	By MS/MS	By MS/MS
MSMEG_0559|MSMEG_0559|conserved	MSMEG_0559|MSMEG_0559|conserved	3	3	3	MSMEG_0559|MSMEG_0559|conserved domain protein|67 AA	1	3	3	3	3	3	3	3	3	3	3	3	3	3	3	3	3	3	3	3	3	3	3	3	3	3	3	3	3	3	3	3	3	3	70.1	70.1	70.1	7.1048	67	67	0	12.74	By MS/MS	By MS/MS
MSMEG_0561|MSMEG_0561|putative	MSMEG_0561|MSMEG_0561|putative	1	1	1	MSMEG_0561|MSMEG_0561|putative TetR family protein receptor protein|226 AA	1	1	1	1	1	1	1	1	1	1	1	1	1	1	1	1	1	1	1	1	1	1	1	1	1	1	1	1	1	1	1	1	1	1	4.9	4.9	4.9	24.181	226	226	0.0009324	2.8237	By MS/MS	By MS/MS
MSMEG_0576|MSMEG_0576|MmpL4	MSMEG_0576|MSMEG_0576|MmpL4	1	1	1	MSMEG_0576|MSMEG_0576|MmpL4 protein|963 AA	1	1	1	1	0	0	1	0	0	0	1	1	1	0	0	0	1	0	0	0	1	1	1	0	0	0	1	0	0	0	1	1	1	0	1.6	1.6	1.6	104.33	963	963	0.0013755	2.6242
MSMEG_0580|MSMEG_0580|conserved	MSMEG_0580|MSMEG_0580|conserved	2	2	2	MSMEG_0580|MSMEG_0580|conserved hypothetical protein|264 AA	1	2	2	2	1	1	1	2	2	1	2	2	2	2	1	1	1	2	2	1	2	2	2	2	1	1	1	2	2	1	2	2	2	2	22.3	22.3	22.3	28.622	264	264	0	44.607	By MS/MS	By MS/MS
MSMEG_0581|gabT|4-aminobutyrate	MSMEG_0581|gabT|4-aminobutyrate	3	2	2	MSMEG_0581|gabT|4-aminobutyrate transaminase|448 AA	1	3	2	2	2	2	3	3	2	2	2	2	2	2	1	1	2	2	1	1	1	1	1	1	1	1	2	2	1	1	1	1	1	1	6.7	3.6	3.6	46.489	448	448	0.002726	2.3723	By matching	By matching
MSMEG_0586|MSMEG_0586|stas	MSMEG_0586|MSMEG_0586|stas	2	2	2	MSMEG_0586|MSMEG_0586|stas domain, putative|129 AA	1	2	2	2	2	1	1	2	1	2	2	1	1	1	2	1	1	2	1	2	2	1	1	1	2	1	1	2	1	2	2	1	1	1	17.8	17.8	17.8	13.638	129	129	0	17.783	By MS/MS	By MS/MS
MSMEG_0590|rhaD|rhamnulose-1-phosphate	MSMEG_0590|rhaD|rhamnulose-1-phosphate	3	3	3	MSMEG_0590|rhaD|rhamnulose-1-phosphate aldolase/alcohol dehydrogenase|684 AA	1	3	3	3	0	0	0	1	0	1	1	1	1	2	0	0	0	1	0	1	1	1	1	2	0	0	0	1	0	1	1	1	1	2	7.7	7.7	7.7	72.34	684	684	0	12.343
MSMEG_0592|MSMEG_0592|putative	MSMEG_0592|MSMEG_0592|putative	1	1	1	MSMEG_0592|MSMEG_0592|putative rhamnose catabolism operon transcriptional regulator|333 AA	1	1	1	1	1	1	1	1	1	0	1	1	1	1	1	1	1	1	1	0	1	1	1	1	1	1	1	1	1	0	1	1	1	1	4.5	4.5	4.5	35.149	333	333	0	3.9501	By matching	By MS/MS
MSMEG_0593|MSMEG_0593|conserved	MSMEG_0593|MSMEG_0593|conserved	5	5	5	MSMEG_0593|MSMEG_0593|conserved hypothetical protein|215 AA	1	5	5	5	4	3	3	4	3	4	3	3	4	5	4	3	3	4	3	4	3	3	4	5	4	3	3	4	3	4	3	3	4	5	45.6	45.6	45.6	22.652	215	215	0	5.2764	By MS/MS	By matching
MSMEG_0594|MSMEG_0594|iron-sulfur	MSMEG_0594|MSMEG_0594|iron-sulfur	2	2	2	MSMEG_0594|MSMEG_0594|iron-sulfur cluster binding protein|489 AA	1	2	2	2	1	0	1	2	1	2	1	1	1	1	1	0	1	2	1	2	1	1	1	1	1	0	1	2	1	2	1	1	1	1	5.5	5.5	5.5	53.026	489	489	0.0092186	1.8672	By matching
MSMEG_0599|MSMEG_0599|acyl-CoA	MSMEG_0599|MSMEG_0599|acyl-CoA	2	2	2	MSMEG_0599|MSMEG_0599|acyl-CoA synthase|548 AA	1	2	2	2	2	2	2	2	2	2	2	1	2	2	2	2	2	2	2	2	2	1	2	2	2	2	2	2	2	2	2	1	2	2	3.6	3.6	3.6	59.206	548	548	0	12.338	By MS/MS	By MS/MS
MSMEG_0600|MSMEG_0600|dehydrogenase|260	MSMEG_0600|MSMEG_0600|dehydrogenase|260	8	8	8	MSMEG_0600|MSMEG_0600|dehydrogenase|260 AA	1	8	8	8	3	7	6	8	6	6	4	8	8	8	3	7	6	8	6	6	4	8	8	8	3	7	6	8	6	6	4	8	8	8	68.5	68.5	68.5	27.638	260	260	0	73.201	By MS/MS	By MS/MS
MSMEG_0603|MSMEG_0603|putative	MSMEG_0603|MSMEG_0603|putative	9	9	9	MSMEG_0603|MSMEG_0603|putative acyl-CoA dehydrogenase|734 AA	1	9	9	9	6	6	1	8	8	5	7	5	9	6	6	6	1	8	8	5	7	5	9	6	6	6	1	8	8	5	7	5	9	6	19.3	19.3	19.3	78.753	734	734	0	31.657	By MS/MS	By MS/MS
MSMEG_0604|MSMEG_0604|glyoxylate	MSMEG_0604|MSMEG_0604|glyoxylate	2	2	2	MSMEG_0604|MSMEG_0604|glyoxylate reductase|322 AA	1	2	2	2	0	2	1	1	1	0	0	2	1	1	0	2	1	1	1	0	0	2	1	1	0	2	1	1	1	0	0	2	1	1	15.8	15.8	15.8	34.73	322	322	0	4.075		By MS/MS
MSMEG_0607|MSMEG_0607|methyltransferase,	MSMEG_0607|MSMEG_0607|methyltransferase,	2	2	2	MSMEG_0607|MSMEG_0607|methyltransferase, putative, family protein|280 AA	1	2	2	2	0	1	0	2	1	0	1	1	0	0	0	1	0	2	1	0	1	1	0	0	0	1	0	2	1	0	1	1	0	0	7.1	7.1	7.1	30.214	280	280	0	5.0876		By MS/MS
MSMEG_0624|mycP3|subtilase	MSMEG_0624|mycP3|subtilase	1	1	1	MSMEG_0624|mycP3|subtilase family protein|459 AA	1	1	1	1	0	0	1	0	1	0	0	0	1	0	0	0	1	0	1	0	0	0	1	0	0	0	1	0	1	0	0	0	1	0	3.9	3.9	3.9	46.432	459	459	0	11.245
MSMEG_0628|MSMEG_0628|amidohydrolase	MSMEG_0628|MSMEG_0628|amidohydrolase	5	5	5	MSMEG_0628|MSMEG_0628|amidohydrolase family protein|295 AA	1	5	5	5	4	4	5	5	4	5	4	5	5	5	4	4	5	5	4	5	4	5	5	5	4	4	5	5	4	5	4	5	5	5	24.7	24.7	24.7	33.427	295	295	0	42.121	By MS/MS	By MS/MS
MSMEG_0629|MSMEG_0629|trans-aconitate	MSMEG_0629|MSMEG_0629|trans-aconitate	5	5	5	MSMEG_0629|MSMEG_0629|trans-aconitate 2-methyltransferase|254 AA	1	5	5	5	3	4	4	5	4	4	3	4	4	3	3	4	4	5	4	4	3	4	4	3	3	4	4	5	4	4	3	4	4	3	31.5	31.5	31.5	28.504	254	254	0	84.011	By MS/MS	By MS/MS
MSMEG_0636|MSMEG_0636|conserved	MSMEG_0636|MSMEG_0636|conserved	7	7	7	MSMEG_0636|MSMEG_0636|conserved hypothetical protein|161 AA	1	7	7	7	7	6	6	6	6	5	5	7	6	6	7	6	6	6	6	5	5	7	6	6	7	6	6	6	6	5	5	7	6	6	49.7	49.7	49.7	18.485	161	161	0	153.04	By MS/MS	By MS/MS
MSMEG_0637|MSMEG_0637|iron-sulfur	MSMEG_0637|MSMEG_0637|iron-sulfur	5	5	5	MSMEG_0637|MSMEG_0637|iron-sulfur binding oxidoreductase|522 AA	1	5	5	5	2	3	2	3	4	3	3	4	4	4	2	3	2	3	4	3	3	4	4	4	2	3	2	3	4	3	3	4	4	4	15.7	15.7	15.7	55.779	522	522	0	14.603	By MS/MS	By MS/MS
MSMEG_0638|MSMEG_0638|conserved	MSMEG_0638|MSMEG_0638|conserved	4	4	4	MSMEG_0638|MSMEG_0638|conserved hypothetical proline and threonine rich protein|643 AA	1	4	4	4	4	4	3	4	4	4	2	3	4	3	4	4	3	4	4	4	2	3	4	3	4	4	3	4	4	4	2	3	4	3	9.3	9.3	9.3	65.696	643	643	0	14.79	By MS/MS	By MS/MS
MSMEG_0639|MSMEG_0639|oligopeptide	MSMEG_0639|MSMEG_0639|oligopeptide	4	4	4	MSMEG_0639|MSMEG_0639|oligopeptide transport ATP-binding protein AppF|336 AA	1	4	4	4	4	4	4	4	4	4	4	4	4	4	4	4	4	4	4	4	4	4	4	4	4	4	4	4	4	4	4	4	4	4	17.6	17.6	17.6	36.981	336	336	0	30.282	By MS/MS	By MS/MS
MSMEG_0640|MSMEG_0640|oligopeptide	MSMEG_0640|MSMEG_0640|oligopeptide	9	9	9	MSMEG_0640|MSMEG_0640|oligopeptide transport ATP-binding protein OppD|328 AA	1	9	9	9	8	8	7	9	8	8	8	6	8	8	8	8	7	9	8	8	8	6	8	8	8	8	7	9	8	8	8	6	8	8	34.1	34.1	34.1	36.058	328	328	0	54.832	By MS/MS	By MS/MS
MSMEG_0643|MSMEG_0643|extracellular	MSMEG_0643|MSMEG_0643|extracellular	19	19	19	MSMEG_0643|MSMEG_0643|extracellular solute-binding protein, family protein 5, putative|551 AA	1	19	19	19	13	18	17	16	16	14	16	16	16	17	13	18	17	16	16	14	16	16	16	17	13	18	17	16	16	14	16	16	16	17	49.2	49.2	49.2	60.56	551	551	0	323.31	By MS/MS	By MS/MS
MSMEG_0645|MSMEG_0645|putative	MSMEG_0645|MSMEG_0645|putative	6	6	6	MSMEG_0645|MSMEG_0645|putative beta-1,3-glucanase|280 AA	1	6	6	6	6	6	6	6	6	6	6	6	6	6	6	6	6	6	6	6	6	6	6	6	6	6	6	6	6	6	6	6	6	6	30.4	30.4	30.4	30.651	280	280	0	77.683	By MS/MS	By MS/MS
MSMEG_0655|MSMEG_0655|glucose	MSMEG_0655|MSMEG_0655|glucose	3	3	3	MSMEG_0655|MSMEG_0655|glucose 1-dehydrogenase, putative|259 AA	1	3	3	3	2	1	1	0	1	1	2	0	2	1	2	1	1	0	1	1	2	0	2	1	2	1	1	0	1	1	2	0	2	1	14.3	14.3	14.3	26.563	259	259	0	6.8736	By MS/MS	By matching
MSMEG_0665|MSMEG_0665|sarcosine	MSMEG_0665|MSMEG_0665|sarcosine	3	3	3	MSMEG_0665|MSMEG_0665|sarcosine oxidase subunit beta, putative|403 AA	1	3	3	3	2	0	2	3	2	1	2	2	2	2	2	0	2	3	2	1	2	2	2	2	2	0	2	3	2	1	2	2	2	2	13.6	13.6	13.6	42.445	403	403	0	11.225	By MS/MS
MSMEG_0670|MSMEG_0670|FAD	MSMEG_0670|MSMEG_0670|FAD	7	7	7	MSMEG_0670|MSMEG_0670|FAD dependent oxidoreductase|313 AA	1	7	7	7	4	6	6	6	5	4	4	5	6	6	4	6	6	6	5	4	4	5	6	6	4	6	6	6	5	4	4	5	6	6	45.7	45.7	45.7	32.978	313	313	0	128.51	By MS/MS	By MS/MS
MSMEG_0672|MSMEG_0672|conserved	MSMEG_0672|MSMEG_0672|conserved	2	2	2	MSMEG_0672|MSMEG_0672|conserved hypothetical protein|217 AA	1	2	2	2	2	2	1	1	1	2	2	2	1	1	2	2	1	1	1	2	2	2	1	1	2	2	1	1	1	2	2	2	1	1	8.3	8.3	8.3	23.244	217	217	0	4.1794	By matching	By matching
MSMEG_0673|MSMEG_0673|hypothetical	MSMEG_0673|MSMEG_0673|hypothetical	1	1	1	MSMEG_0673|MSMEG_0673|hypothetical protein|180 AA	1	1	1	1	1	0	1	1	1	1	0	1	1	1	1	0	1	1	1	1	0	1	1	1	1	0	1	1	1	1	0	1	1	1	13.3	13.3	13.3	16.356	180	180	0	3.5122	By MS/MS
MSMEG_0674|MSMEG_0674|ErfK/YbiS/YcfS/YnhG	MSMEG_0674|MSMEG_0674|ErfK/YbiS/YcfS/YnhG	2	2	2	MSMEG_0674|MSMEG_0674|ErfK/YbiS/YcfS/YnhG family protein|336 AA	1	2	2	2	2	0	1	1	1	0	1	1	2	1	2	0	1	1	1	0	1	1	2	1	2	0	1	1	1	0	1	1	2	1	13.1	13.1	13.1	35.532	336	336	0	4.0838	By matching
MSMEG_0678|dcd|deoxycytidine	MSMEG_0678|dcd|deoxycytidine	3	3	3	MSMEG_0678|dcd|deoxycytidine triphosphate deaminase|189 AA	1	3	3	3	2	2	3	3	2	2	2	3	2	3	2	2	3	3	2	2	2	3	2	3	2	2	3	3	2	2	2	3	2	3	23.3	23.3	23.3	20.638	189	189	0	17.597	By MS/MS	By MS/MS
MSMEG_0679|MSMEG_0679|conserved	MSMEG_0679|MSMEG_0679|conserved	3	3	3	MSMEG_0679|MSMEG_0679|conserved hypothetical protein|562 AA	1	3	3	3	2	3	3	3	3	2	3	2	3	3	2	3	3	3	3	2	3	2	3	3	2	3	3	3	3	2	3	2	3	3	8.4	8.4	8.4	56.364	562	562	0	32.395	By MS/MS	By MS/MS
MSMEG_0682|MSMEG_0682|conserved	MSMEG_0682|MSMEG_0682|conserved	4	4	4	MSMEG_0682|MSMEG_0682|conserved hypothetical protein, putative|250 AA	1	4	4	4	3	3	3	4	3	4	3	3	3	3	3	3	3	4	3	4	3	3	3	3	3	3	3	4	3	4	3	3	3	3	13.6	13.6	13.6	27.343	250	250	0	8.7704	By MS/MS	By MS/MS
MSMEG_0683|MSMEG_0683|conserved	MSMEG_0683|MSMEG_0683|conserved	4	4	4	MSMEG_0683|MSMEG_0683|conserved hypothetical protein|122 AA	1	4	4	4	3	4	3	3	3	3	4	3	4	4	3	4	3	3	3	3	4	3	4	4	3	4	3	3	3	3	4	3	4	4	57.4	57.4	57.4	12.744	122	122	0	64.422	By MS/MS	By MS/MS
MSMEG_0684|MSMEG_0684|aldehyde	MSMEG_0684|MSMEG_0684|aldehyde	3	3	3	MSMEG_0684|MSMEG_0684|aldehyde oxidase and xanthine dehydrogenase, molybdopterin binding|704 AA	1	3	3	3	0	2	0	3	2	3	1	0	3	2	0	2	0	3	2	3	1	0	3	2	0	2	0	3	2	3	1	0	3	2	7.2	7.2	7.2	74.773	704	704	0	24.481		By MS/MS
MSMEG_0685|MSMEG_0685|oxidoreductase,	MSMEG_0685|MSMEG_0685|oxidoreductase,	3	3	3	MSMEG_0685|MSMEG_0685|oxidoreductase, molybdopterin-binding subunit|331 AA	1	3	3	3	2	2	2	2	2	2	3	3	3	3	2	2	2	2	2	2	3	3	3	3	2	2	2	2	2	2	3	3	3	3	11.8	11.8	11.8	35.251	331	331	0	9.0519	By MS/MS	By MS/MS
MSMEG_0686|MSMEG_0686|oxidoreductase|173	MSMEG_0686|MSMEG_0686|oxidoreductase|173	3	3	3	MSMEG_0686|MSMEG_0686|oxidoreductase|173 AA	1	3	3	3	2	3	2	3	3	3	3	3	3	3	2	3	2	3	3	3	3	3	3	3	2	3	2	3	3	3	3	3	3	3	24.9	24.9	24.9	18.441	173	173	0	24.829	By MS/MS	By MS/MS
MSMEG_0690|MSMEG_0690|iron-sulfur	MSMEG_0690|MSMEG_0690|iron-sulfur	16	16	16	MSMEG_0690|MSMEG_0690|iron-sulfur cluster-binding protein|1042 AA	1	16	16	16	14	16	14	15	14	12	14	15	13	16	14	16	14	15	14	12	14	15	13	16	14	16	14	15	14	12	14	15	13	16	26.8	26.8	26.8	110.9	1042	1042	0	323.31	By MS/MS	By MS/MS
MSMEG_0692|MSMEG_0692|conserved	MSMEG_0692|MSMEG_0692|conserved	14	14	14	MSMEG_0692|MSMEG_0692|conserved hypothetical protein|595 AA	1	14	14	14	10	12	11	13	11	10	11	12	14	12	10	12	11	13	11	10	11	12	14	12	10	12	11	13	11	10	11	12	14	12	55	55	55	59.553	595	595	0	107.91	By MS/MS	By MS/MS
MSMEG_0695|MSMEG_0695|isoniazid	MSMEG_0695|MSMEG_0695|isoniazid	3	3	3	MSMEG_0695|MSMEG_0695|isoniazid inductible protein IniA|602 AA	1	3	3	3	3	1	3	3	2	1	2	3	3	2	3	1	3	3	2	1	2	3	3	2	3	1	3	3	2	1	2	3	3	2	7.1	7.1	7.1	65.894	602	602	0	21.293	By MS/MS	By matching
MSMEG_0696|MSMEG_0696|alanine-rich	MSMEG_0696|MSMEG_0696|alanine-rich	2	2	2	MSMEG_0696|MSMEG_0696|alanine-rich protein|113 AA	1	2	2	2	1	2	1	1	1	1	1	1	2	1	1	2	1	1	1	1	1	1	2	1	1	2	1	1	1	1	1	1	2	1	40.7	40.7	40.7	12.084	113	113	0	5.8154	By matching	By MS/MS
MSMEG_0702|MSMEG_0702|monooxygenase|310	MSMEG_0702|MSMEG_0702|monooxygenase|310	12	12	12	MSMEG_0702|MSMEG_0702|monooxygenase|310 AA	1	12	12	12	9	11	10	11	10	10	9	10	10	12	9	11	10	11	10	10	9	10	10	12	9	11	10	11	10	10	9	10	10	12	65.5	65.5	65.5	33.464	310	310	0	161.64	By MS/MS	By MS/MS
MSMEG_0703|MSMEG_0703|conserved	MSMEG_0703|MSMEG_0703|conserved	10	10	10	MSMEG_0703|MSMEG_0703|conserved hypothetical protein|207 AA	1	10	10	10	7	10	9	8	9	8	8	10	9	9	7	10	9	8	9	8	8	10	9	9	7	10	9	8	9	8	8	10	9	9	61.4	61.4	61.4	22.433	207	207	0	108.8	By MS/MS	By MS/MS
MSMEG_0709|dnaK|chaperone	MSMEG_0709|dnaK|chaperone	36	36	36	MSMEG_0709|dnaK|chaperone protein DnaK|622 AA	1	36	36	36	28	32	31	30	31	30	32	34	33	32	28	32	31	30	31	30	32	34	33	32	28	32	31	30	31	30	32	34	33	32	63.7	63.7	63.7	66.646	622	622	0	323.31	By MS/MS	By MS/MS
MSMEG_0710|grpE|co-chaperone	MSMEG_0710|grpE|co-chaperone	14	14	14	MSMEG_0710|grpE|co-chaperone GrpE|216 AA	1	14	14	14	12	13	13	12	13	10	13	13	13	14	12	13	13	12	13	10	13	13	13	14	12	13	13	12	13	10	13	13	13	14	66.2	66.2	66.2	23.005	216	216	0	270.19	By MS/MS	By MS/MS
MSMEG_0711|dnaJ|chaperone	MSMEG_0711|dnaJ|chaperone	7	7	7	MSMEG_0711|dnaJ|chaperone protein DnaJ|390 AA	1	7	7	7	4	5	5	5	7	5	5	5	3	5	4	5	5	5	7	5	5	5	3	5	4	5	5	5	7	5	5	5	3	5	26.4	26.4	26.4	41.107	390	390	0	75.597	By MS/MS	By MS/MS
MSMEG_0717|MSMEG_0717|aldose	MSMEG_0717|MSMEG_0717|aldose	8	8	8	MSMEG_0717|MSMEG_0717|aldose 1-epimerase subfamily protein|300 AA	1	8	8	8	4	3	4	7	5	4	6	7	5	5	4	3	4	7	5	4	6	7	5	5	4	3	4	7	5	4	6	7	5	5	46.3	46.3	46.3	31.817	300	300	0	31.546	By MS/MS	By MS/MS
MSMEG_0732|MSMEG_0732|chaperone	MSMEG_0732|MSMEG_0732|chaperone	26	24	24	MSMEG_0732|MSMEG_0732|chaperone ClpB|848 AA	1	26	24	24	23	22	21	25	22	25	24	21	24	25	21	20	19	23	20	23	22	19	22	23	21	20	19	23	20	23	22	19	22	23	36.6	34.2	34.2	92.896	848	848	0	107.46	By MS/MS	By MS/MS
MSMEG_0733|dapB|dihydrodipicolinate	MSMEG_0733|dapB|dihydrodipicolinate	2	2	2	MSMEG_0733|dapB|dihydrodipicolinate reductase, N-terminus domain protein|359 AA	1	2	2	2	1	0	1	1	1	1	2	1	1	1	1	0	1	1	1	1	2	1	1	1	1	0	1	1	1	1	2	1	1	1	7.2	7.2	7.2	38.83	359	359	0	4.1402	By matching
MSMEG_0734|MSMEG_0734|Rieske	MSMEG_0734|MSMEG_0734|Rieske	1	1	1	MSMEG_0734|MSMEG_0734|Rieske [2Fe-2S] domain protein|359 AA	1	1	1	1	0	0	0	0	1	1	0	1	1	0	0	0	0	0	1	1	0	1	1	0	0	0	0	0	1	1	0	1	1	0	4.5	4.5	4.5	40.165	359	359	0	10.382
MSMEG_0740|MSMEG_0740|glycosyl	MSMEG_0740|MSMEG_0740|glycosyl	2	2	2	MSMEG_0740|MSMEG_0740|glycosyl hydrolase family protein 76|393 AA	1	2	2	2	1	2	2	2	2	1	2	2	1	2	1	2	2	2	2	1	2	2	1	2	1	2	2	2	2	1	2	2	1	2	9.4	9.4	9.4	43.457	393	393	0	36.219	By matching	By matching
MSMEG_0741|MSMEG_0741|conserved	MSMEG_0741|MSMEG_0741|conserved	4	4	4	MSMEG_0741|MSMEG_0741|conserved hypothetical protein|302 AA	1	4	4	4	4	4	4	4	4	4	4	4	4	4	4	4	4	4	4	4	4	4	4	4	4	4	4	4	4	4	4	4	4	4	13.2	13.2	13.2	32.435	302	302	0	11.997	By MS/MS	By MS/MS
MSMEG_0743|MSMEG_0743|xanthine	MSMEG_0743|MSMEG_0743|xanthine	2	2	2	MSMEG_0743|MSMEG_0743|xanthine dehydrogenase|386 AA	1	2	2	2	0	0	1	1	0	0	1	1	2	1	0	0	1	1	0	0	1	1	2	1	0	0	1	1	0	0	1	1	2	1	6.7	6.7	6.7	40.503	386	386	0.00046926	2.908
MSMEG_0752|fbaA|fructose-bisphosphate	MSMEG_0752|fbaA|fructose-bisphosphate	3	3	3	MSMEG_0752|fbaA|fructose-bisphosphate aldolase, class II|345 AA	1	3	3	3	3	3	3	3	3	3	3	3	3	3	3	3	3	3	3	3	3	3	3	3	3	3	3	3	3	3	3	3	3	3	9.9	9.9	9.9	36.595	345	345	0	21.252	By MS/MS	By MS/MS
MSMEG_0753|MSMEG_0753|conserved	MSMEG_0753|MSMEG_0753|conserved	4	4	4	MSMEG_0753|MSMEG_0753|conserved hypothetical protein|266 AA	1	4	4	4	3	4	4	4	4	4	4	4	3	4	3	4	4	4	4	4	4	4	3	4	3	4	4	4	4	4	4	4	3	4	27.1	27.1	27.1	28.976	266	266	0	20.785	By MS/MS	By MS/MS
MSMEG_0754|MSMEG_0754|conserved	MSMEG_0754|MSMEG_0754|conserved	7	7	7	MSMEG_0754|MSMEG_0754|conserved hypothetical protein|135 AA	1	7	7	7	6	7	7	6	6	6	7	7	7	7	6	7	7	6	6	6	7	7	7	7	6	7	7	6	6	6	7	7	7	7	83.7	83.7	83.7	14.397	135	135	0	114.87	By MS/MS	By MS/MS
MSMEG_0759|purA|adenylosuccinate	MSMEG_0759|purA|adenylosuccinate	14	14	14	MSMEG_0759|purA|adenylosuccinate synthetase|431 AA	1	14	14	14	9	12	12	12	13	11	11	12	12	12	9	12	12	12	13	11	11	12	12	12	9	12	12	12	13	11	11	12	12	12	42.9	42.9	42.9	46.338	431	431	0	139.59	By MS/MS	By MS/MS
MSMEG_0763|MSMEG_0763|antibiotic	MSMEG_0763|MSMEG_0763|antibiotic	1	1	1	MSMEG_0763|MSMEG_0763|antibiotic transporter|664 AA	1	1	1	1	0	1	0	1	0	0	0	0	0	1	0	1	0	1	0	0	0	0	0	1	0	1	0	1	0	0	0	0	0	1	2.7	2.7	2.7	68.045	664	664	0	7.1715		By MS/MS
MSMEG_0766|purT|phosphoribosylglycinamide	MSMEG_0766|purT|phosphoribosylglycinamide	9	9	9	MSMEG_0766|purT|phosphoribosylglycinamide formyltransferase 2|466 AA	1	9	9	9	7	9	5	7	7	7	7	9	8	8	7	9	5	7	7	7	7	9	8	8	7	9	5	7	7	7	7	9	8	8	33.9	33.9	33.9	49.033	466	466	0	73.286	By MS/MS	By MS/MS
MSMEG_0767|MSMEG_0767|hypothetical	MSMEG_0767|MSMEG_0767|hypothetical	2	2	2	MSMEG_0767|MSMEG_0767|hypothetical protein|161 AA	1	2	2	2	1	1	1	2	2	1	1	2	2	2	1	1	1	2	2	1	1	2	2	2	1	1	1	2	2	1	1	2	2	2	14.9	14.9	14.9	17.575	161	161	0	5.8547	By matching	By matching
MSMEG_0768|MSMEG_0768|conserved	MSMEG_0768|MSMEG_0768|conserved	8	8	8	MSMEG_0768|MSMEG_0768|conserved hypothetical protein|136 AA	1	8	8	8	5	8	8	8	8	8	8	8	8	8	5	8	8	8	8	8	8	8	8	8	5	8	8	8	8	8	8	8	8	8	84.6	84.6	84.6	14.766	136	136	0	103.97	By MS/MS	By MS/MS
MSMEG_0769|metZ|O-succinylhomoserine	MSMEG_0769|metZ|O-succinylhomoserine	18	18	18	MSMEG_0769|metZ|O-succinylhomoserine sulfhydrylase|405 AA	1	18	18	18	13	15	16	18	17	16	15	16	17	18	13	15	16	18	17	16	15	16	17	18	13	15	16	18	17	16	15	16	17	18	66.2	66.2	66.2	43.266	405	405	0	153.41	By MS/MS	By MS/MS
MSMEG_0775|MSMEG_0775|metallo-beta-lactamase	MSMEG_0775|MSMEG_0775|metallo-beta-lactamase	2	2	2	MSMEG_0775|MSMEG_0775|metallo-beta-lactamase superfamily protein|248 AA	1	2	2	2	1	1	1	1	1	1	1	2	2	2	1	1	1	1	1	1	1	2	2	2	1	1	1	1	1	1	1	2	2	2	14.9	14.9	14.9	26.647	248	248	0	36.927	By MS/MS	By MS/MS
MSMEG_0777|MSMEG_0777|F420-dependent	MSMEG_0777|MSMEG_0777|F420-dependent	18	18	18	MSMEG_0777|MSMEG_0777|F420-dependent glucose-6-phosphate dehydrogenase|337 AA	1	18	18	18	13	16	14	16	15	14	14	17	15	15	13	16	14	16	15	14	14	17	15	15	13	16	14	16	15	14	14	17	15	15	70	70	70	37.275	337	337	0	189.85	By MS/MS	By MS/MS
MSMEG_0779|MSMEG_0779|short-chain	MSMEG_0779|MSMEG_0779|short-chain	5	5	5	MSMEG_0779|MSMEG_0779|short-chain dehydrogenase/reductase SDR|258 AA	1	5	5	5	4	3	3	5	3	2	4	4	4	3	4	3	3	5	3	2	4	4	4	3	4	3	3	5	3	2	4	4	4	3	34.1	34.1	34.1	26.111	258	258	0	9.1748	By matching	By MS/MS
MSMEG_0782|MSMEG_0782|aminotransferase	MSMEG_0782|MSMEG_0782|aminotransferase	1	1	1	MSMEG_0782|MSMEG_0782|aminotransferase class-III|440 AA	1	1	1	1	1	1	1	1	1	1	1	1	1	1	1	1	1	1	1	1	1	1	1	1	1	1	1	1	1	1	1	1	1	1	3.9	3.9	3.9	47.273	440	440	0	6.7772	By MS/MS	By MS/MS
MSMEG_0783|pta|phosphate	MSMEG_0783|pta|phosphate	14	14	14	MSMEG_0783|pta|phosphate acetyltransferase|692 AA	1	14	14	14	12	10	10	12	13	13	13	12	13	14	12	10	10	12	13	13	13	12	13	14	12	10	10	12	13	13	13	12	13	14	33.2	33.2	33.2	73.32	692	692	0	127.99	By MS/MS	By MS/MS
MSMEG_0784|ackA|acetate	MSMEG_0784|ackA|acetate	5	5	5	MSMEG_0784|ackA|acetate kinase|376 AA	1	5	5	5	2	3	4	5	5	4	5	4	5	5	2	3	4	5	5	4	5	4	5	5	2	3	4	5	5	4	5	4	5	5	23.9	23.9	23.9	40.115	376	376	0	48.08	By matching	By matching
MSMEG_0789|thiE|thiamine-phosphate	MSMEG_0789|thiE|thiamine-phosphate	9	9	9	MSMEG_0789|thiE|thiamine-phosphate pyrophosphorylase|227 AA	1	9	9	9	3	9	5	6	7	6	6	7	7	9	3	9	5	6	7	6	6	7	7	9	3	9	5	6	7	6	6	7	7	9	48.9	48.9	48.9	23.939	227	227	0	75.631	By MS/MS	By MS/MS
MSMEG_0791|thiO|glycine	MSMEG_0791|thiO|glycine	10	10	10	MSMEG_0791|thiO|glycine oxidase ThiO|334 AA	1	10	10	10	4	5	7	8	6	5	6	6	6	7	4	5	7	8	6	5	6	6	6	7	4	5	7	8	6	5	6	6	6	7	39.5	39.5	39.5	35.837	334	334	0	23.949	By matching	By MS/MS
MSMEG_0792|thiS|thiamine	MSMEG_0792|thiS|thiamine	2	2	2	MSMEG_0792|thiS|thiamine biosynthesis protein ThiS|66 AA	1	2	2	2	2	1	1	1	2	2	2	2	2	1	2	1	1	1	2	2	2	2	2	1	2	1	1	1	2	2	2	2	2	1	33.3	33.3	33.3	7.226	66	66	0	32.951	By MS/MS	By matching
MSMEG_0793|thiG|thiazole	MSMEG_0793|thiG|thiazole	10	10	10	MSMEG_0793|thiG|thiazole biosynthesis protein ThiG|252 AA	1	10	10	10	5	10	9	8	9	8	8	9	9	9	5	10	9	8	9	8	8	9	9	9	5	10	9	8	9	8	8	9	9	9	57.5	57.5	57.5	25.644	252	252	0	102.46	By MS/MS	By MS/MS
MSMEG_0806|MSMEG_0806|hydrolase|503	MSMEG_0806|MSMEG_0806|hydrolase|503	5	5	5	MSMEG_0806|MSMEG_0806|hydrolase|503 AA	1	5	5	5	5	5	5	5	4	5	4	4	4	5	5	5	5	5	4	5	4	4	4	5	5	5	5	5	4	5	4	4	4	5	14.9	14.9	14.9	52.898	503	503	0	26.06	By MS/MS	By MS/MS
MSMEG_0814|MSMEG_0814|membrane	MSMEG_0814|MSMEG_0814|membrane	2	2	2	MSMEG_0814|MSMEG_0814|membrane protein|90 AA	1	2	2	2	1	2	1	1	2	2	2	2	1	2	1	2	1	1	2	2	2	2	1	2	1	2	1	1	2	2	2	2	1	2	38.9	38.9	38.9	9.4819	90	90	0	15.397	By matching	By matching
MSMEG_0819|MSMEG_0819|N-carbamoyl-L-amino	MSMEG_0819|MSMEG_0819|N-carbamoyl-L-amino	5	5	5	MSMEG_0819|MSMEG_0819|N-carbamoyl-L-amino acid amidohydrolase|419 AA	1	5	5	5	4	3	5	5	5	5	5	4	4	5	4	3	5	5	5	5	5	4	4	5	4	3	5	5	5	5	5	4	4	5	15.8	15.8	15.8	45.164	419	419	0	14.917	By MS/MS	By matching
MSMEG_0821|MSMEG_0821|glutamyl-tRNA(Gln)	MSMEG_0821|MSMEG_0821|glutamyl-tRNA(Gln)	2	2	2	MSMEG_0821|MSMEG_0821|glutamyl-tRNA(Gln) amidotransferase subunit A|487 AA	1	2	2	2	1	0	2	2	2	2	1	0	1	1	1	0	2	2	2	2	1	0	1	1	1	0	2	2	2	2	1	0	1	1	7.2	7.2	7.2	51.02	487	487	0	3.751	By matching
MSMEG_0823|MSMEG_0823|conserved	MSMEG_0823|MSMEG_0823|conserved	1	1	1	MSMEG_0823|MSMEG_0823|conserved hypothetical protein|184 AA	1	1	1	1	1	1	1	1	1	1	1	1	1	1	1	1	1	1	1	1	1	1	1	1	1	1	1	1	1	1	1	1	1	1	6.5	6.5	6.5	19.489	184	184	0	12.01	By matching	By matching
MSMEG_0824|MSMEG_0824|conserved	MSMEG_0824|MSMEG_0824|conserved	4	4	4	MSMEG_0824|MSMEG_0824|conserved hypothetical protein|215 AA	1	4	4	4	3	3	3	3	3	3	4	3	3	3	3	3	3	3	3	3	4	3	3	3	3	3	3	3	3	3	4	3	3	3	26	26	26	22.502	215	215	0	26.744	By MS/MS	By MS/MS
MSMEG_0825|thiD|phosphomethylpyrimidine	MSMEG_0825|thiD|phosphomethylpyrimidine	7	7	7	MSMEG_0825|thiD|phosphomethylpyrimidine kinase|278 AA	1	7	7	7	5	6	5	5	5	5	6	6	6	6	5	6	5	5	5	5	6	6	6	6	5	6	5	5	5	5	6	6	6	6	47.5	47.5	47.5	28.732	278	278	0	234.92	By MS/MS	By MS/MS
MSMEG_0826|thiC|thiamine	MSMEG_0826|thiC|thiamine	18	18	18	MSMEG_0826|thiC|thiamine biosynthesis protein ThiC|524 AA	1	18	18	18	8	14	13	13	13	12	13	12	14	12	8	14	13	13	13	12	13	12	14	12	8	14	13	13	13	12	13	12	14	12	50.6	50.6	50.6	57.514	524	524	0	162.94	By MS/MS	By MS/MS
MSMEG_0828|MSMEG_0828|immunogenic	MSMEG_0828|MSMEG_0828|immunogenic	5	5	5	MSMEG_0828|MSMEG_0828|immunogenic protein MPT63|356 AA	1	5	5	5	4	5	5	5	5	5	4	5	5	5	4	5	5	5	5	5	4	5	5	5	4	5	5	5	5	5	4	5	5	5	20.2	20.2	20.2	34.476	356	356	0	178.14	By MS/MS	By MS/MS
MSMEG_0829|xth|exodeoxyribonuclease	MSMEG_0829|xth|exodeoxyribonuclease	2	2	2	MSMEG_0829|xth|exodeoxyribonuclease III|260 AA	1	2	2	2	1	1	1	1	0	0	2	1	0	1	1	1	1	1	0	0	2	1	0	1	1	1	1	1	0	0	2	1	0	1	8.1	8.1	8.1	29.108	260	260	0	2.9395	By matching	By MS/MS
MSMEG_0832|def|peptide	MSMEG_0832|def|peptide	4	4	4	MSMEG_0832|def|peptide deformylase|197 AA	1	4	4	4	3	4	4	3	3	3	3	3	3	3	3	4	4	3	3	3	3	3	3	3	3	4	4	3	3	3	3	3	3	3	36	36	36	21.208	197	197	0	80.494	By MS/MS	By MS/MS
MSMEG_0833|MSMEG_0833|conserved	MSMEG_0833|MSMEG_0833|conserved	3	3	3	MSMEG_0833|MSMEG_0833|conserved hypothetical protein|103 AA	1	3	3	3	3	3	2	3	3	3	3	3	3	3	3	3	2	3	3	3	3	3	3	3	3	3	2	3	3	3	3	3	3	3	31.1	31.1	31.1	11.861	103	103	0	90.173	By MS/MS	By MS/MS
MSMEG_0834|MSMEG_0834|tuberculin	MSMEG_0834|MSMEG_0834|tuberculin	3	3	3	MSMEG_0834|MSMEG_0834|tuberculin related peptide|158 AA	1	3	3	3	3	3	3	3	3	3	3	3	3	3	3	3	3	3	3	3	3	3	3	3	3	3	3	3	3	3	3	3	3	3	27.2	27.2	27.2	16.85	158	158	0	110.05	By MS/MS	By MS/MS
MSMEG_0835|sodC|copper/zinc	MSMEG_0835|sodC|copper/zinc	3	3	3	MSMEG_0835|sodC|copper/zinc superoxide dismutase|236 AA	1	3	3	3	3	3	3	3	3	3	3	3	3	3	3	3	3	3	3	3	3	3	3	3	3	3	3	3	3	3	3	3	3	3	22	22	22	23.213	236	236	0	84.136	By MS/MS	By MS/MS
MSMEG_0839|MSMEG_0839|ATP-dependent	MSMEG_0839|MSMEG_0839|ATP-dependent	3	3	3	MSMEG_0839|MSMEG_0839|ATP-dependent protease La (LON) domain subfamily protein|208 AA	1	3	3	3	3	2	3	3	3	3	3	3	3	3	3	2	3	3	3	3	3	3	3	3	3	2	3	3	3	3	3	3	3	3	16.8	16.8	16.8	22.494	208	208	0	4.968	By MS/MS	By MS/MS
MSMEG_0842|MSMEG_0842|hypothetical	MSMEG_0842|MSMEG_0842|hypothetical	2	2	2	MSMEG_0842|MSMEG_0842|hypothetical protein|94 AA	1	2	2	2	2	2	2	2	2	2	2	2	2	2	2	2	2	2	2	2	2	2	2	2	2	2	2	2	2	2	2	2	2	2	25.5	25.5	25.5	9.8647	94	94	0	5.6836	By matching	By MS/MS
MSMEG_0858|MSMEG_0858|cell	MSMEG_0858|MSMEG_0858|cell	8	7	7	MSMEG_0858|MSMEG_0858|cell division control protein Cdc48|745 AA	1	8	7	7	4	2	6	5	5	6	4	5	3	4	4	2	6	4	4	6	3	4	3	3	4	2	6	4	4	6	3	4	3	3	17.2	15.6	15.6	78.12	745	745	0	23.494	By MS/MS	By MS/MS
MSMEG_0859|MSMEG_0859|transcriptional	MSMEG_0859|MSMEG_0859|transcriptional	9	9	9	MSMEG_0859|MSMEG_0859|transcriptional regulator, TetR family protein|337 AA	1	9	9	9	5	7	6	6	6	6	7	6	6	8	5	7	6	6	6	6	7	6	6	8	5	7	6	6	6	6	7	6	6	8	32.3	32.3	32.3	37.055	337	337	0	151.96	By MS/MS	By MS/MS
MSMEG_0861|psd|phosphatidylserine	MSMEG_0861|psd|phosphatidylserine	2	2	2	MSMEG_0861|psd|phosphatidylserine decarboxylase|232 AA	1	2	2	2	2	2	1	2	2	2	2	2	2	2	2	2	1	2	2	2	2	2	2	2	2	2	1	2	2	2	2	2	2	2	9.5	9.5	9.5	24.816	232	232	0.0013889	2.7363	By matching	By matching
MSMEG_0862|MSMEG_0862|molybdopterin	MSMEG_0862|MSMEG_0862|molybdopterin	6	6	6	MSMEG_0862|MSMEG_0862|molybdopterin biosynthesis protein MoeA|398 AA	1	6	6	6	5	5	6	5	6	5	5	5	6	5	5	5	6	5	6	5	5	5	6	5	5	5	6	5	6	5	5	5	6	5	27.4	27.4	27.4	41.194	398	398	0	11.158	By MS/MS	By MS/MS
MSMEG_0863|MSMEG_0863|short	MSMEG_0863|MSMEG_0863|short	3	3	3	MSMEG_0863|MSMEG_0863|short chain dehydrogenase|307 AA	1	3	3	3	3	3	3	3	3	3	3	3	3	3	3	3	3	3	3	3	3	3	3	3	3	3	3	3	3	3	3	3	3	3	13.7	13.7	13.7	33.209	307	307	0	132.97	By MS/MS	By MS/MS
MSMEG_0866|MSMEG_0866|DNA	MSMEG_0866|MSMEG_0866|DNA	2	2	2	MSMEG_0866|MSMEG_0866|DNA or RNA helicase of superfamily protein II|568 AA	1	2	2	2	2	1	1	1	2	2	2	1	1	2	2	1	1	1	2	2	2	1	1	2	2	1	1	1	2	2	2	1	1	2	5.8	5.8	5.8	62.484	568	568	0	36.416	By MS/MS	By matching
MSMEG_0867|MSMEG_0867|hydrolase|271	MSMEG_0867|MSMEG_0867|hydrolase|271	7	7	7	MSMEG_0867|MSMEG_0867|hydrolase|271 AA	1	7	7	7	3	2	3	7	5	1	4	5	5	6	3	2	3	7	5	1	4	5	5	6	3	2	3	7	5	1	4	5	5	6	52.4	52.4	52.4	29.022	271	271	0	32.822	By MS/MS	By MS/MS
MSMEG_0876|MSMEG_0876|short	MSMEG_0876|MSMEG_0876|short	6	6	6	MSMEG_0876|MSMEG_0876|short chain dehydrogenase|305 AA	1	6	6	6	4	4	5	5	5	4	3	5	5	5	4	4	5	5	5	4	3	5	5	5	4	4	5	5	5	4	3	5	5	5	32.5	32.5	32.5	32.561	305	305	0	120.75	By MS/MS	By MS/MS
MSMEG_0877|MSMEG_0877|dihydrodipicolinate	MSMEG_0877|MSMEG_0877|dihydrodipicolinate	10	10	10	MSMEG_0877|MSMEG_0877|dihydrodipicolinate synthase|310 AA	1	10	10	10	8	9	8	9	9	9	9	8	9	8	8	9	8	9	9	9	9	8	9	8	8	9	8	9	9	9	9	8	9	8	57.4	57.4	57.4	31.959	310	310	0	82.49	By MS/MS	By MS/MS
MSMEG_0880|groL1|chaperonin	MSMEG_0880|groL1|chaperonin	38	38	37	MSMEG_0880|groL1|chaperonin GroL|541 AA	1	38	38	37	30	36	33	33	36	34	33	36	35	35	30	36	33	33	36	34	33	36	35	35	29	35	32	32	35	33	32	35	34	34	82.8	82.8	81.1	56.487	541	541	0	323.31	By MS/MS	By MS/MS
MSMEG_0882|MSMEG_0882|conserved	MSMEG_0882|MSMEG_0882|conserved	4	4	4	MSMEG_0882|MSMEG_0882|conserved hypothetical protein|127 AA	1	4	4	4	3	4	4	3	4	4	4	4	4	3	3	4	4	3	4	4	4	4	4	3	3	4	4	3	4	4	4	4	4	3	49.6	49.6	49.6	13.637	127	127	0	49.897	By MS/MS	By MS/MS
MSMEG_0883|MSMEG_0883|amidohydrolase	MSMEG_0883|MSMEG_0883|amidohydrolase	3	3	3	MSMEG_0883|MSMEG_0883|amidohydrolase family protein|580 AA	1	3	3	3	0	2	2	3	3	2	3	2	3	3	0	2	2	3	3	2	3	2	3	3	0	2	2	3	3	2	3	2	3	3	8.3	8.3	8.3	61.829	580	580	0	26.334		By MS/MS
MSMEG_0884|MSMEG_0884|glyoxalase	MSMEG_0884|MSMEG_0884|glyoxalase	4	4	4	MSMEG_0884|MSMEG_0884|glyoxalase family protein|126 AA	1	4	4	4	3	4	4	4	4	4	4	4	4	4	3	4	4	4	4	4	4	4	4	4	3	4	4	4	4	4	4	4	4	4	50.8	50.8	50.8	13.681	126	126	0	44.445	By matching	By MS/MS
MSMEG_0887|MSMEG_0887|conserved	MSMEG_0887|MSMEG_0887|conserved	2	2	2	MSMEG_0887|MSMEG_0887|conserved hypothetical protein|185 AA	1	2	2	2	2	2	2	2	2	2	2	2	1	2	2	2	2	2	2	2	2	2	1	2	2	2	2	2	2	2	2	2	1	2	16.8	16.8	16.8	20.514	185	185	0	4.7795	By MS/MS	By MS/MS
MSMEG_0889|MSMEG_0889|succinic	MSMEG_0889|MSMEG_0889|succinic	1	1	1	MSMEG_0889|MSMEG_0889|succinic semialdehyde dehydrogenase|509 AA	1	1	1	1	0	0	0	1	0	1	1	1	1	1	0	0	0	1	0	1	1	1	1	1	0	0	0	1	0	1	1	1	1	1	2	2	2	54.505	509	509	0.0070922	1.9652
MSMEG_0890|MSMEG_0890|HD	MSMEG_0890|MSMEG_0890|HD	3	3	3	MSMEG_0890|MSMEG_0890|HD domain protein|199 AA	1	3	3	3	2	1	1	2	2	2	2	2	2	3	2	1	1	2	2	2	2	2	2	3	2	1	1	2	2	2	2	2	2	3	22.6	22.6	22.6	21.842	199	199	0	8.5872	By MS/MS	By matching
MSMEG_0894|MSMEG_0894|dihydrodipicolinate	MSMEG_0894|MSMEG_0894|dihydrodipicolinate	3	3	3	MSMEG_0894|MSMEG_0894|dihydrodipicolinate reductase|454 AA	1	3	3	3	3	2	3	3	3	2	2	2	2	2	3	2	3	3	3	2	2	2	2	2	3	2	3	3	3	2	2	2	2	2	7.3	7.3	7.3	48.94	454	454	0	12.076	By MS/MS	By MS/MS
MSMEG_0897|MSMEG_0897|conserved	MSMEG_0897|MSMEG_0897|conserved	2	2	2	MSMEG_0897|MSMEG_0897|conserved hypothetical protein|425 AA	1	2	2	2	2	0	2	2	2	2	2	2	2	2	2	0	2	2	2	2	2	2	2	2	2	0	2	2	2	2	2	2	2	2	7.8	7.8	7.8	44.314	425	425	0	49.222	By MS/MS
MSMEG_0899|MSMEG_0899|prolyl	MSMEG_0899|MSMEG_0899|prolyl	20	20	20	MSMEG_0899|MSMEG_0899|prolyl oligopeptidase family protein|671 AA	1	20	20	20	12	16	16	17	18	14	15	20	17	19	12	16	16	17	18	14	15	20	17	19	12	16	16	17	18	14	15	20	17	19	47.1	47.1	47.1	74.921	671	671	0	150.47	By MS/MS	By MS/MS
MSMEG_0901|MSMEG_0901|conserved	MSMEG_0901|MSMEG_0901|conserved	5	5	5	MSMEG_0901|MSMEG_0901|conserved hypothetical protein|158 AA	1	5	5	5	3	5	5	5	4	4	4	5	5	5	3	5	5	5	4	4	4	5	5	5	3	5	5	5	4	4	4	5	5	5	62.7	62.7	62.7	16.541	158	158	0	87.318	By MS/MS	By MS/MS
MSMEG_0903|lpdA|dihydrolipoamide	MSMEG_0903|lpdA|dihydrolipoamide	20	20	20	MSMEG_0903|lpdA|dihydrolipoamide dehydrogenase|464 AA	1	20	20	20	14	19	18	19	20	19	18	18	19	19	14	19	18	19	20	19	18	18	19	19	14	19	18	19	20	19	18	18	19	19	58	58	58	49.469	464	464	0	205.21	By MS/MS	By MS/MS
MSMEG_0909|MSMEG_0909|acyl-ACP	MSMEG_0909|MSMEG_0909|acyl-ACP	4	4	4	MSMEG_0909|MSMEG_0909|acyl-ACP thioesterase superfamily protein|282 AA	1	4	4	4	3	1	4	4	4	3	4	4	3	3	3	1	4	4	4	3	4	4	3	3	3	1	4	4	4	3	4	4	3	3	16.3	16.3	16.3	32.196	282	282	0	79.894	By MS/MS	By MS/MS
MSMEG_0911|aceA|isocitrate	MSMEG_0911|aceA|isocitrate	25	25	25	MSMEG_0911|aceA|isocitrate lyase|428 AA	1	25	25	25	19	24	24	24	23	23	22	23	22	24	19	24	24	24	23	23	22	23	22	24	19	24	24	24	23	23	22	23	22	24	78.7	78.7	78.7	47.089	428	428	0	323.31	By MS/MS	By MS/MS
MSMEG_0912|MSMEG_0912|3-hydroxybutyryl-CoA	MSMEG_0912|MSMEG_0912|3-hydroxybutyryl-CoA	13	13	13	MSMEG_0912|MSMEG_0912|3-hydroxybutyryl-CoA dehydrogenase|286 AA	1	13	13	13	9	13	12	12	12	13	13	12	12	12	9	13	12	12	12	13	13	12	12	12	9	13	12	12	12	13	13	12	12	12	57.7	57.7	57.7	30.681	286	286	0	142.43	By MS/MS	By MS/MS
MSMEG_0913|MSMEG_0913|methoxy	MSMEG_0913|MSMEG_0913|methoxy	13	13	12	MSMEG_0913|MSMEG_0913|methoxy mycolic acid synthase 1|290 AA	1	13	13	12	9	11	10	10	11	10	10	10	10	12	9	11	10	10	11	10	10	10	10	12	8	10	9	9	10	9	9	9	9	11	51.4	51.4	49	33.068	290	290	0	129.55	By MS/MS	By MS/MS
MSMEG_0915|MSMEG_0915|polyphosphate	MSMEG_0915|MSMEG_0915|polyphosphate	3	3	3	MSMEG_0915|MSMEG_0915|polyphosphate kinase 2 superfamily protein|295 AA	1	3	3	3	3	3	3	3	2	3	3	3	3	3	3	3	3	3	2	3	3	3	3	3	3	3	3	3	2	3	3	3	3	3	11.9	11.9	11.9	33.85	295	295	0	7.3968	By matching	By MS/MS
MSMEG_0918|MSMEG_0918|transcriptional	MSMEG_0918|MSMEG_0918|transcriptional	7	7	7	MSMEG_0918|MSMEG_0918|transcriptional regulator, XRE family protein|142 AA	1	7	7	7	3	7	5	4	6	5	5	7	6	6	3	7	5	4	6	5	5	7	6	6	3	7	5	4	6	5	5	7	6	6	58.5	58.5	58.5	15.328	142	142	0	48.065	By MS/MS	By MS/MS
MSMEG_0919|MSMEG_0919|heparin-binding	MSMEG_0919|MSMEG_0919|heparin-binding	10	10	10	MSMEG_0919|MSMEG_0919|heparin-binding hemagglutinin|232 AA	1	10	10	10	9	10	9	10	9	9	9	10	9	9	9	10	9	10	9	9	9	10	9	9	9	10	9	10	9	9	9	10	9	9	43.1	43.1	43.1	24.561	232	232	0	259.15	By MS/MS	By MS/MS
MSMEG_0922|deoC|deoxyribose-phosphate	MSMEG_0922|deoC|deoxyribose-phosphate	4	4	4	MSMEG_0922|deoC|deoxyribose-phosphate aldolase|227 AA	1	4	4	4	3	4	2	3	4	3	3	4	4	4	3	4	2	3	4	3	3	4	4	4	3	4	2	3	4	3	3	4	4	4	29.1	29.1	29.1	22.434	227	227	0	68.567	By matching	By MS/MS
MSMEG_0924|MSMEG_0924|hydrolase,	MSMEG_0924|MSMEG_0924|hydrolase,	2	2	2	MSMEG_0924|MSMEG_0924|hydrolase, carbon-nitrogen family protein|266 AA	1	2	2	2	2	0	1	2	1	1	0	1	1	1	2	0	1	2	1	1	0	1	1	1	2	0	1	2	1	1	0	1	1	1	12.4	12.4	12.4	27.749	266	266	0	7.4166	By MS/MS
MSMEG_0927|MSMEG_0927|conserved	MSMEG_0927|MSMEG_0927|conserved	2	2	2	MSMEG_0927|MSMEG_0927|conserved hypothetical protein|168 AA	1	2	2	2	0	0	1	2	1	0	0	0	1	2	0	0	1	2	1	0	0	0	1	2	0	0	1	2	1	0	0	0	1	2	28.6	28.6	28.6	18.158	168	168	0	21.982
MSMEG_0928|murB|UDP-N-acetylenolpyruvoylglucosamine	MSMEG_0928|murB|UDP-N-acetylenolpyruvoylglucosamine	4	4	4	MSMEG_0928|murB|UDP-N-acetylenolpyruvoylglucosamine reductase|363 AA	1	4	4	4	3	4	2	4	4	3	3	3	3	4	3	4	2	4	4	3	3	3	3	4	3	4	2	4	4	3	3	3	3	4	19	19	19	38.238	363	363	0	20.223	By MS/MS	By MS/MS
MSMEG_0930|MSMEG_0930|serine	MSMEG_0930|MSMEG_0930|serine	11	11	11	MSMEG_0930|MSMEG_0930|serine 3-dehydrogenase|249 AA	1	11	11	11	5	8	4	8	8	6	4	7	7	9	5	8	4	8	8	6	4	7	7	9	5	8	4	8	8	6	4	7	7	9	68.7	68.7	68.7	26.439	249	249	0	95.544	By MS/MS	By MS/MS
MSMEG_0933|MSMEG_0933|conserved	MSMEG_0933|MSMEG_0933|conserved	2	2	2	MSMEG_0933|MSMEG_0933|conserved hypothetical protein|434 AA	1	2	2	2	1	1	2	2	0	2	0	0	1	1	1	1	2	2	0	2	0	0	1	1	1	1	2	2	0	2	0	0	1	1	6.5	6.5	6.5	45.935	434	434	0	5.1501	By matching	By matching
MSMEG_0935|MSMEG_0935|2,3-bisphosphoglycerate-dependent	MSMEG_0935|MSMEG_0935|2,3-bisphosphoglycerate-dependent	16	16	16	MSMEG_0935|MSMEG_0935|2,3-bisphosphoglycerate-dependent phosphoglycerate mutase|247 AA	1	16	16	16	12	15	13	14	15	15	15	16	15	16	12	15	13	14	15	15	15	16	15	16	12	15	13	14	15	15	15	16	15	16	79.8	79.8	79.8	27.3	247	247	0	222.46	By MS/MS	By MS/MS
MSMEG_0937|regX3|DNA-binding	MSMEG_0937|regX3|DNA-binding	5	5	5	MSMEG_0937|regX3|DNA-binding response regulator RegX3|225 AA	1	5	5	5	4	4	4	4	4	4	4	5	4	4	4	4	4	4	4	4	4	5	4	4	4	4	4	4	4	4	4	5	4	4	30.2	30.2	30.2	24.624	225	225	0	126.54	By MS/MS	By MS/MS
MSMEG_0938|MSMEG_0938|conserved	MSMEG_0938|MSMEG_0938|conserved	2	2	2	MSMEG_0938|MSMEG_0938|conserved hypothetical protein|266 AA	1	2	2	2	1	1	1	2	2	2	2	2	2	2	1	1	1	2	2	2	2	2	2	2	1	1	1	2	2	2	2	2	2	2	8.6	8.6	8.6	29.869	266	266	0	5.6915	By matching	By MS/MS
MSMEG_0940|MSMEG_0940|conserved	MSMEG_0940|MSMEG_0940|conserved	12	12	12	MSMEG_0940|MSMEG_0940|conserved hypothetical protein|356 AA	1	12	12	12	9	10	11	10	8	9	10	8	11	10	9	10	11	10	8	9	10	8	11	10	9	10	11	10	8	9	10	8	11	10	51.7	51.7	51.7	38.015	356	356	0	144.75	By MS/MS	By MS/MS
MSMEG_0943|proC|pyrroline-5-carboxylate	MSMEG_0943|proC|pyrroline-5-carboxylate	13	13	13	MSMEG_0943|proC|pyrroline-5-carboxylate reductase|286 AA	1	13	13	13	9	12	11	13	12	10	11	12	13	13	9	12	11	13	12	10	11	12	13	13	9	12	11	13	12	10	11	12	13	13	69.2	69.2	69.2	28.989	286	286	0	174.84	By MS/MS	By MS/MS
MSMEG_0944|MSMEG_0944|DNA	MSMEG_0944|MSMEG_0944|DNA	3	3	3	MSMEG_0944|MSMEG_0944|DNA binding domain, excisionase family protein|72 AA	1	3	3	3	2	3	3	3	3	3	3	3	3	3	2	3	3	3	3	3	3	3	3	3	2	3	3	3	3	3	3	3	3	3	54.2	54.2	54.2	7.8559	72	72	0	40.319	By MS/MS	By MS/MS
MSMEG_0948|MSMEG_0948|conserved	MSMEG_0948|MSMEG_0948|conserved	7	7	7	MSMEG_0948|MSMEG_0948|conserved hypothetical protein|177 AA	1	7	7	7	2	4	4	5	4	3	3	5	5	6	2	4	4	5	4	3	3	5	5	6	2	4	4	5	4	3	3	5	5	6	65	65	65	19.568	177	177	0	26.252	By MS/MS	By MS/MS
MSMEG_0951|MSMEG_0951|glutaredoxin	MSMEG_0951|MSMEG_0951|glutaredoxin	1	1	1	MSMEG_0951|MSMEG_0951|glutaredoxin 2|80 AA	1	1	1	1	0	0	1	1	1	0	1	1	1	1	0	0	1	1	1	0	1	1	1	1	0	0	1	1	1	0	1	1	1	1	30	30	30	8.6846	80	80	0	5.3772
MSMEG_0952|hemA|glutamyl-tRNA	MSMEG_0952|hemA|glutamyl-tRNA	2	2	2	MSMEG_0952|hemA|glutamyl-tRNA reductase|451 AA	1	2	2	2	2	0	2	1	1	1	1	2	2	1	2	0	2	1	1	1	1	2	2	1	2	0	2	1	1	1	1	2	2	1	6	6	6	47.444	451	451	0.0013768	2.6409	By MS/MS
MSMEG_0953|hemC|porphobilinogen	MSMEG_0953|hemC|porphobilinogen	9	9	9	MSMEG_0953|hemC|porphobilinogen deaminase|318 AA	1	9	9	9	7	9	8	8	8	7	8	9	8	8	7	9	8	8	8	7	8	9	8	8	7	9	8	8	8	7	8	9	8	8	44	44	44	33.259	318	318	0	125.07	By MS/MS	By MS/MS
MSMEG_0954|hemD|uroporphyrinogen-III	MSMEG_0954|hemD|uroporphyrinogen-III	9	9	9	MSMEG_0954|hemD|uroporphyrinogen-III synthase|610 AA	1	9	9	9	6	7	8	8	6	6	6	8	8	8	6	7	8	8	6	6	6	8	8	8	6	7	8	8	6	6	6	8	8	8	31.1	31.1	31.1	63.821	610	610	0	78.595	By MS/MS	By MS/MS
MSMEG_0956|hemB|delta-aminolevulinic	MSMEG_0956|hemB|delta-aminolevulinic	5	5	5	MSMEG_0956|hemB|delta-aminolevulinic acid dehydratase|326 AA	1	5	5	5	3	4	2	3	1	2	2	4	3	2	3	4	2	3	1	2	2	4	3	2	3	4	2	3	1	2	2	4	3	2	24.2	24.2	24.2	34.638	326	326	0	31.107	By MS/MS	By MS/MS
MSMEG_0963|MSMEG_0963|hypothetical	MSMEG_0963|MSMEG_0963|hypothetical	2	2	2	MSMEG_0963|MSMEG_0963|hypothetical protein|80 AA	1	2	2	2	1	2	1	1	0	0	0	1	1	0	1	2	1	1	0	0	0	1	1	0	1	2	1	1	0	0	0	1	1	0	53.8	53.8	53.8	8.6733	80	80	0	9.1479	By MS/MS	By MS/MS
MSMEG_0964|MSMEG_0964|pyridoxamine	MSMEG_0964|MSMEG_0964|pyridoxamine	1	1	1	MSMEG_0964|MSMEG_0964|pyridoxamine 5-phosphate oxidase family protein|160 AA	1	1	1	1	1	0	0	0	1	1	0	1	0	0	1	0	0	0	1	1	0	1	0	0	1	0	0	0	1	1	0	1	0	0	7.5	7.5	7.5	17.906	160	160	0.0027298	2.3843	By MS/MS
MSMEG_0969|hemL|glutamate-1-semialdehyde-2,1-aminomutase|451	MSMEG_0969|hemL|glutamate-1-semialdehyde-2,1-aminomutase|451	13	13	13	MSMEG_0969|hemL|glutamate-1-semialdehyde-2,1-aminomutase|451 AA	1	13	13	13	12	13	13	13	13	12	12	13	13	13	12	13	13	13	13	12	12	13	13	13	12	13	13	13	13	12	12	13	13	13	51.2	51.2	51.2	46.771	451	451	0	237.5	By MS/MS	By MS/MS
MSMEG_0970|MSMEG_0970|phosphoglycerate	MSMEG_0970|MSMEG_0970|phosphoglycerate	4	4	4	MSMEG_0970|MSMEG_0970|phosphoglycerate mutase family protein|202 AA	1	4	4	4	2	2	2	3	2	1	2	2	4	3	2	2	2	3	2	1	2	2	4	3	2	2	2	3	2	1	2	2	4	3	34.7	34.7	34.7	22.681	202	202	0	14.435	By MS/MS	By MS/MS
MSMEG_0971|MSMEG_0971|conserved	MSMEG_0971|MSMEG_0971|conserved	2	2	2	MSMEG_0971|MSMEG_0971|conserved hypothetical protein|217 AA	1	2	2	2	2	2	2	1	2	2	2	2	1	2	2	2	2	1	2	2	2	2	1	2	2	2	2	1	2	2	2	2	1	2	12.9	12.9	12.9	23.333	217	217	0	3.6407	By matching	By MS/MS
MSMEG_0975|MSMEG_0975|conserved	MSMEG_0975|MSMEG_0975|conserved	1	1	1	MSMEG_0975|MSMEG_0975|conserved hypothetical protein|442 AA	1	1	1	1	1	1	1	0	0	0	0	1	1	0	1	1	1	0	0	0	0	1	1	0	1	1	1	0	0	0	0	1	1	0	8.6	8.6	8.6	46.785	442	442	0	8.0938	By MS/MS	By MS/MS
MSMEG_0977|MSMEG_0977|conserved	MSMEG_0977|MSMEG_0977|conserved	1	1	1	MSMEG_0977|MSMEG_0977|conserved hypothetical protein|90 AA	1	1	1	1	0	0	0	0	0	1	0	0	0	1	0	0	0	0	0	1	0	0	0	1	0	0	0	0	0	1	0	0	0	1	12.2	12.2	12.2	9.9648	90	90	0.0018248	2.4569
MSMEG_0978|MSMEG_0978|aminotransferase,	MSMEG_0978|MSMEG_0978|aminotransferase,	5	5	5	MSMEG_0978|MSMEG_0978|aminotransferase, class V superfamily protein|346 AA	1	5	5	5	1	2	2	4	4	2	2	2	3	5	1	2	2	4	4	2	2	2	3	5	1	2	2	4	4	2	2	2	3	5	35.8	35.8	35.8	36.554	346	346	0	46.309	By MS/MS	By MS/MS
MSMEG_0982|MSMEG_0982|immunogenic	MSMEG_0982|MSMEG_0982|immunogenic	2	2	2	MSMEG_0982|MSMEG_0982|immunogenic protein|349 AA	1	2	2	2	1	1	0	1	1	1	1	1	1	2	1	1	0	1	1	1	1	1	1	2	1	1	0	1	1	1	1	1	1	2	11.7	11.7	11.7	36.237	349	349	0	5.5185	By MS/MS	By matching
MSMEG_0983|MSMEG_0983|two-component	MSMEG_0983|MSMEG_0983|two-component	8	8	8	MSMEG_0983|MSMEG_0983|two-component system response regulator|217 AA	1	8	8	8	6	6	7	6	4	6	8	6	7	6	6	6	7	6	4	6	8	6	7	6	6	6	7	6	4	6	8	6	7	6	49.3	49.3	49.3	23.586	217	217	0	47.401	By MS/MS	By MS/MS
MSMEG_0986|MSMEG_0986|RemM	MSMEG_0986|MSMEG_0986|RemM	2	2	2	MSMEG_0986|MSMEG_0986|RemM protein|242 AA	1	2	2	2	1	2	1	1	1	1	1	1	1	1	1	2	1	1	1	1	1	1	1	1	1	2	1	1	1	1	1	1	1	1	16.9	16.9	16.9	25.904	242	242	0	5.3485	By matching	By MS/MS
MSMEG_0987|MSMEG_0987|hypothetical	MSMEG_0987|MSMEG_0987|hypothetical	2	2	2	MSMEG_0987|MSMEG_0987|hypothetical protein|123 AA	1	2	2	2	1	2	1	2	2	1	1	2	2	2	1	2	1	2	2	1	1	2	2	2	1	2	1	2	2	1	1	2	2	2	35	35	35	13.038	123	123	0	22.985	By MS/MS	By MS/MS
MSMEG_0989|MSMEG_0989|conserved	MSMEG_0989|MSMEG_0989|conserved	4	4	4	MSMEG_0989|MSMEG_0989|conserved hypothetical protein|81 AA	1	4	4	4	2	3	4	4	3	3	3	3	4	3	2	3	4	4	3	3	3	3	4	3	2	3	4	4	3	3	3	3	4	3	95.1	95.1	95.1	8.1889	81	81	0	121.56	By MS/MS	By MS/MS
MSMEG_0990|mtaP|methylthioadenosine	MSMEG_0990|mtaP|methylthioadenosine	4	4	4	MSMEG_0990|mtaP|methylthioadenosine phosphorylase|259 AA	1	4	4	4	2	3	3	4	3	3	3	4	4	4	2	3	3	4	3	3	3	4	4	4	2	3	3	4	3	3	3	4	4	4	25.9	25.9	25.9	27.722	259	259	0	22.904	By MS/MS	By matching
MSMEG_0991|MSMEG_0991|NAD-dependent	MSMEG_0991|MSMEG_0991|NAD-dependent	3	3	3	MSMEG_0991|MSMEG_0991|NAD-dependent epimerase/dehydratase|346 AA	1	3	3	3	2	3	3	3	3	3	3	2	3	3	2	3	3	3	3	3	3	2	3	3	2	3	3	3	3	3	3	2	3	3	11	11	11	36.615	346	346	0	6.5963	By MS/MS	By MS/MS
MSMEG_0992|MSMEG_0992|2-nitropropane	MSMEG_0992|MSMEG_0992|2-nitropropane	1	1	1	MSMEG_0992|MSMEG_0992|2-nitropropane dioxygenase, NPD|375 AA	1	1	1	1	1	1	1	1	1	1	1	1	1	1	1	1	1	1	1	1	1	1	1	1	1	1	1	1	1	1	1	1	1	1	3.2	3.2	3.2	39.535	375	375	0.0027335	2.4221	By MS/MS	By matching
MSMEG_1001|MSMEG_1001|acetyltransferase,	MSMEG_1001|MSMEG_1001|acetyltransferase,	6	6	6	MSMEG_1001|MSMEG_1001|acetyltransferase, gnat family protein, putative|285 AA	1	6	6	6	5	2	4	6	2	4	3	3	2	4	5	2	4	6	2	4	3	3	2	4	5	2	4	6	2	4	3	3	2	4	36.5	36.5	36.5	29.796	285	285	0	24.543	By MS/MS	By MS/MS
MSMEG_2285|MSMEG_2285|methyltransferase;MSMEG_1005|MSMEG_1005|methyltransferase	MSMEG_2285|MSMEG_2285|methyltransferase;MSMEG_1005|MSMEG_1005|methyltransferase	1;1	1;1	1;1	MSMEG_2285|MSMEG_2285|methyltransferase type 11|271 AA;MSMEG_1005|MSMEG_1005|methyltransferase type 11|271 AA	2	1	1	1	0	1	1	0	1	1	1	1	1	1	0	1	1	0	1	1	1	1	1	1	0	1	1	0	1	1	1	1	1	1	5.2	5.2	5.2	28.806	271	271;271	0	3.7516		By matching
MSMEG_2286|MSMEG_2286|aminoglycoside;MSMEG_1006|MSMEG_1006|aminoglycoside	MSMEG_2286|MSMEG_2286|aminoglycoside;MSMEG_1006|MSMEG_1006|aminoglycoside	1;1	1;1	1;1	MSMEG_2286|MSMEG_2286|aminoglycoside phosphotransferase|353 AA;MSMEG_1006|MSMEG_1006|aminoglycoside phosphotransferase|353 AA	2	1	1	1	1	0	0	0	1	0	1	0	0	0	1	0	0	0	1	0	1	0	0	0	1	0	0	0	1	0	1	0	0	0	5.9	5.9	5.9	38.398	353	353;353	0	46.598	By MS/MS
MSMEG_2290|MSMEG_2290|transcriptional;MSMEG_1010|MSMEG_1010|transcriptional	MSMEG_2290|MSMEG_2290|transcriptional;MSMEG_1010|MSMEG_1010|transcriptional	11;11	11;11	11;11	MSMEG_2290|MSMEG_2290|transcriptional regulator, TetR family protein|219 AA;MSMEG_1010|MSMEG_1010|transcriptional regulator, TetR family protein|219 AA	2	11	11	11	8	10	8	10	10	9	8	10	9	10	8	10	8	10	10	9	8	10	9	10	8	10	8	10	10	9	8	10	9	10	75.3	75.3	75.3	23.342	219	219;219	0	123.47	By MS/MS	By MS/MS
MSMEG_2291|MSMEG_2291|short;MSMEG_1011|MSMEG_1011|short	MSMEG_2291|MSMEG_2291|short;MSMEG_1011|MSMEG_1011|short	2;2	2;2	2;2	MSMEG_2291|MSMEG_2291|short chain dehydrogenase|287 AA;MSMEG_1011|MSMEG_1011|short chain dehydrogenase|287 AA	2	2	2	2	1	0	1	0	1	1	1	1	0	2	1	0	1	0	1	1	1	1	0	2	1	0	1	0	1	1	1	1	0	2	8	8	8	31.01	287	287;287	0	6.7559	By MS/MS
MSMEG_2295|MSMEG_2295|transcriptional;MSMEG_1015|MSMEG_1015|transcriptional	MSMEG_2295|MSMEG_2295|transcriptional;MSMEG_1015|MSMEG_1015|transcriptional	2;2	2;2	2;2	MSMEG_2295|MSMEG_2295|transcriptional regulator, TetR family protein|204 AA;MSMEG_1015|MSMEG_1015|transcriptional regulator, TetR family protein|204 AA	2	2	2	2	1	2	2	1	2	2	2	2	1	2	1	2	2	1	2	2	2	2	1	2	1	2	2	1	2	2	2	2	1	2	15.7	15.7	15.7	22.047	204	204;204	0	16.141	By matching	By MS/MS
MSMEG_2296|MSMEG_2296|secreted;MSMEG_1016|MSMEG_1016|secreted	MSMEG_2296|MSMEG_2296|secreted;MSMEG_1016|MSMEG_1016|secreted	4;4	4;4	4;4	MSMEG_2296|MSMEG_2296|secreted protein|187 AA;MSMEG_1016|MSMEG_1016|secreted protein|187 AA	2	4	4	4	2	2	3	4	1	1	3	3	4	2	2	2	3	4	1	1	3	3	4	2	2	2	3	4	1	1	3	3	4	2	37.4	37.4	37.4	19.473	187	187;187	0	11.927	By MS/MS	By matching
MSMEG_2297|MSMEG_2297|glutaredoxin|79;MSMEG_1017|MSMEG_1017|glutaredoxin|79	MSMEG_2297|MSMEG_2297|glutaredoxin|79;MSMEG_1017|MSMEG_1017|glutaredoxin|79	1;1	1;1	1;1	MSMEG_2297|MSMEG_2297|glutaredoxin|79 AA;MSMEG_1017|MSMEG_1017|glutaredoxin|79 AA	2	1	1	1	0	0	1	1	0	1	0	1	1	0	0	0	1	1	0	1	0	1	1	0	0	0	1	1	0	1	0	1	1	0	21.5	21.5	21.5	8.5407	79	79;79	0.001385	2.7019
MSMEG_2299|MSMEG_2299|ribonucleoside-diphosphate;MSMEG_1019|MSMEG_1019|ribonucleoside-diphosphate	MSMEG_2299|MSMEG_2299|ribonucleoside-diphosphate;MSMEG_1019|MSMEG_1019|ribonucleoside-diphosphate	14;14	14;14	14;14	MSMEG_2299|MSMEG_2299|ribonucleoside-diphosphate reductase, alpha subunit|706 AA;MSMEG_1019|MSMEG_1019|ribonucleoside-diphosphate reductase, alpha subunit|706 AA	2	14	14	14	9	8	7	12	9	8	11	12	11	13	9	8	7	12	9	8	11	12	11	13	9	8	7	12	9	8	11	12	11	13	26.1	26.1	26.1	80.545	706	706;706	0	57.545	By MS/MS	By MS/MS
MSMEG_2301|MSMEG_2301|glyoxalase/bleomycin;MSMEG_1021|MSMEG_1021|glyoxalase/bleomycin	MSMEG_2301|MSMEG_2301|glyoxalase/bleomycin;MSMEG_1021|MSMEG_1021|glyoxalase/bleomycin	3;3	3;3	3;3	MSMEG_2301|MSMEG_2301|glyoxalase/bleomycin resistance protein/dioxygenase|139 AA;MSMEG_1021|MSMEG_1021|glyoxalase/bleomycin resistance protein/dioxygenase|139 AA	2	3	3	3	2	2	2	2	2	2	2	2	2	3	2	2	2	2	2	2	2	2	2	3	2	2	2	2	2	2	2	2	2	3	36	36	36	15.036	139	139;139	0	19.259	By MS/MS	By matching
MSMEG_2307|MSMEG_2307|conserved;MSMEG_1027|MSMEG_1027|conserved	MSMEG_2307|MSMEG_2307|conserved;MSMEG_1027|MSMEG_1027|conserved	1;1	1;1	1;1	MSMEG_2307|MSMEG_2307|conserved hypothetical protein|292 AA;MSMEG_1027|MSMEG_1027|conserved hypothetical protein|292 AA	2	1	1	1	1	1	1	1	1	1	1	1	1	1	1	1	1	1	1	1	1	1	1	1	1	1	1	1	1	1	1	1	1	1	5.1	5.1	5.1	32.015	292	292;292	0	45.244	By matching	By matching
MSMEG_2308|MSMEG_2308|geranylgeranyl;MSMEG_1028|MSMEG_1028|geranylgeranyl	MSMEG_2308|MSMEG_2308|geranylgeranyl;MSMEG_1028|MSMEG_1028|geranylgeranyl	13;13	13;13	13;13	MSMEG_2308|MSMEG_2308|geranylgeranyl reductase|395 AA;MSMEG_1028|MSMEG_1028|geranylgeranyl reductase|395 AA	2	13	13	13	12	10	12	10	10	9	9	11	10	13	12	10	12	10	10	9	9	11	10	13	12	10	12	10	10	9	9	11	10	13	45.1	45.1	45.1	43.095	395	395;395	0	83.069	By MS/MS	By MS/MS
MSMEG_2310|MSMEG_2310|monooxygenase|499;MSMEG_1030|MSMEG_1030|monooxygenase|499	MSMEG_2310|MSMEG_2310|monooxygenase|499;MSMEG_1030|MSMEG_1030|monooxygenase|499	10;10	10;10	10;10	MSMEG_2310|MSMEG_2310|monooxygenase|499 AA;MSMEG_1030|MSMEG_1030|monooxygenase|499 AA	2	10	10	10	10	7	8	9	9	8	10	9	9	7	10	7	8	9	9	8	10	9	9	7	10	7	8	9	9	8	10	9	9	7	22.4	22.4	22.4	56.177	499	499;499	0	41.642	By MS/MS	By MS/MS
MSMEG_2313|MSMEG_2313|ribonucleoside-diphosphate;MSMEG_1033|MSMEG_1033|ribonucleoside-diphosphate	MSMEG_2313|MSMEG_2313|ribonucleoside-diphosphate;MSMEG_1033|MSMEG_1033|ribonucleoside-diphosphate	11;11	11;11	11;11	MSMEG_2313|MSMEG_2313|ribonucleoside-diphosphate reductase, beta subunit|324 AA;MSMEG_1033|MSMEG_1033|ribonucleoside-diphosphate reductase, beta subunit|324 AA	2	11	11	11	10	10	10	10	10	10	11	10	10	10	10	10	10	10	10	10	11	10	10	10	10	10	10	10	10	10	11	10	10	10	46.3	46.3	46.3	37.196	324	324;324	0	149.89	By MS/MS	By MS/MS
MSMEG_2317|MSMEG_2317|alcohol;MSMEG_1037|MSMEG_1037|alcohol	MSMEG_2317|MSMEG_2317|alcohol;MSMEG_1037|MSMEG_1037|alcohol	12;12	12;12	12;12	MSMEG_2317|MSMEG_2317|alcohol dehydrogenase, zinc-containing|349 AA;MSMEG_1037|MSMEG_1037|alcohol dehydrogenase, zinc-containing|349 AA	2	12	12	12	9	10	11	12	11	10	12	12	11	11	9	10	11	12	11	10	12	12	11	11	9	10	11	12	11	10	12	12	11	11	59.3	59.3	59.3	37.2	349	349;349	0	272.55	By MS/MS	By MS/MS
MSMEG_2318|MSMEG_2318|GTP;MSMEG_1038|MSMEG_1038|GTP	MSMEG_2318|MSMEG_2318|GTP;MSMEG_1038|MSMEG_1038|GTP	3;3	3;3	3;3	MSMEG_2318|MSMEG_2318|GTP cyclohydrolase II|91 AA;MSMEG_1038|MSMEG_1038|GTP cyclohydrolase II|91 AA	2	3	3	3	1	2	3	3	3	3	2	3	2	3	1	2	3	3	3	3	2	3	2	3	1	2	3	3	3	3	2	3	2	3	67	67	67	9.7819	91	91;91	0	27.512	By MS/MS	By MS/MS
MSMEG_2319|MSMEG_2319|Periplasmic;MSMEG_1039|MSMEG_1039|Periplasmic	MSMEG_2319|MSMEG_2319|Periplasmic;MSMEG_1039|MSMEG_1039|Periplasmic	8;8	8;8	8;8	MSMEG_2319|MSMEG_2319|Periplasmic binding protein|357 AA;MSMEG_1039|MSMEG_1039|Periplasmic binding protein|357 AA	2	8	8	8	5	5	5	7	7	7	6	6	7	8	5	5	5	7	7	7	6	6	7	8	5	5	5	7	7	7	6	6	7	8	48.5	48.5	48.5	36.903	357	357;357	0	266.99	By MS/MS	By MS/MS
MSMEG_2321|serB|phosphoserine;MSMEG_1041|serB|phosphoserine	MSMEG_2321|serB|phosphoserine;MSMEG_1041|serB|phosphoserine	5;5	5;5	5;5	MSMEG_2321|serB|phosphoserine phosphatase|413 AA;MSMEG_1041|serB|phosphoserine phosphatase|413 AA	2	5	5	5	2	2	3	3	3	2	3	3	3	5	2	2	3	3	3	2	3	3	3	5	2	2	3	3	3	2	3	3	3	5	23.2	23.2	23.2	43.837	413	413;413	0	12.891	By MS/MS	By MS/MS
MSMEG_2322|MSMEG_2322|hypothetical;MSMEG_1042|MSMEG_1042|hypothetical	MSMEG_2322|MSMEG_2322|hypothetical;MSMEG_1042|MSMEG_1042|hypothetical	4;4	4;4	4;4	MSMEG_2322|MSMEG_2322|hypothetical protein|97 AA;MSMEG_1042|MSMEG_1042|hypothetical protein|97 AA	2	4	4	4	3	4	3	3	3	3	4	3	3	3	3	4	3	3	3	3	4	3	3	3	3	4	3	3	3	3	4	3	3	3	67	67	67	9.5141	97	97;97	0	26.997	By MS/MS	By MS/MS
MSMEG_2326|MSMEG_2326|ABC-type;MSMEG_1046|MSMEG_1046|ABC-type	MSMEG_2326|MSMEG_2326|ABC-type;MSMEG_1046|MSMEG_1046|ABC-type	9;9	9;9	9;9	MSMEG_2326|MSMEG_2326|ABC-type molybdenum transport system, ATPase component|282 AA;MSMEG_1046|MSMEG_1046|ABC-type molybdenum transport system, ATPase component|282 AA	2	9	9	9	6	8	9	8	7	7	7	9	8	9	6	8	9	8	7	7	7	9	8	9	6	8	9	8	7	7	7	9	8	9	52.1	52.1	52.1	30.657	282	282;282	0	170.94	By MS/MS	By MS/MS
MSMEG_2327|MSMEG_2327|nudix;MSMEG_1047|MSMEG_1047|nudix	MSMEG_2327|MSMEG_2327|nudix;MSMEG_1047|MSMEG_1047|nudix	8;8	8;8	8;8	MSMEG_2327|MSMEG_2327|nudix hydrolase|273 AA;MSMEG_1047|MSMEG_1047|nudix hydrolase|273 AA	2	8	8	8	4	6	6	8	7	7	8	7	8	7	4	6	6	8	7	7	8	7	8	7	4	6	6	8	7	7	8	7	8	7	44	44	44	30.286	273	273;273	0	57.722	By MS/MS	By MS/MS
MSMEG_2328|MSMEG_2328|probable;MSMEG_1048|MSMEG_1048|probable	MSMEG_2328|MSMEG_2328|probable;MSMEG_1048|MSMEG_1048|probable	5;5	5;5	5;5	MSMEG_2328|MSMEG_2328|probable enoyl-CoA hydratase|235 AA;MSMEG_1048|MSMEG_1048|probable enoyl-CoA hydratase|235 AA	2	5	5	5	5	5	5	5	5	5	5	5	4	5	5	5	5	5	5	5	5	5	4	5	5	5	5	5	5	5	5	5	4	5	26.8	26.8	26.8	24.771	235	235;235	0	21.629	By MS/MS	By matching
MSMEG_2329|MSMEG_2329|methyltransferase,;MSMEG_1049|MSMEG_1049|methyltransferase,	MSMEG_2329|MSMEG_2329|methyltransferase,;MSMEG_1049|MSMEG_1049|methyltransferase,	10;10	10;10	10;10	MSMEG_2329|MSMEG_2329|methyltransferase, UbiE/COQ5 family protein|326 AA;MSMEG_1049|MSMEG_1049|methyltransferase, UbiE/COQ5 family protein|326 AA	2	10	10	10	3	4	4	8	6	3	5	7	6	8	3	4	4	8	6	3	5	7	6	8	3	4	4	8	6	3	5	7	6	8	39.9	39.9	39.9	36.275	326	326;326	0	33.932	By MS/MS	By MS/MS
MSMEG_2331|MSMEG_2331|immunogenic;MSMEG_1051|MSMEG_1051|immunogenic	MSMEG_2331|MSMEG_2331|immunogenic;MSMEG_1051|MSMEG_1051|immunogenic	8;8	8;8	8;8	MSMEG_2331|MSMEG_2331|immunogenic protein MPB64/MPT64|233 AA;MSMEG_1051|MSMEG_1051|immunogenic protein MPB64/MPT64|233 AA	2	8	8	8	6	8	7	8	8	8	8	8	8	8	6	8	7	8	8	8	8	8	8	8	6	8	7	8	8	8	8	8	8	8	46.8	46.8	46.8	24.738	233	233;233	0	84.248	By MS/MS	By MS/MS
MSMEG_2333|MSMEG_2333|conserved;MSMEG_1053|MSMEG_1053|conserved	MSMEG_2333|MSMEG_2333|conserved;MSMEG_1053|MSMEG_1053|conserved	8;8	8;8	8;8	MSMEG_2333|MSMEG_2333|conserved hypothetical protein|427 AA;MSMEG_1053|MSMEG_1053|conserved hypothetical protein|427 AA	2	8	8	8	6	5	6	7	5	6	6	5	6	6	6	5	6	7	5	6	6	5	6	6	6	5	6	7	5	6	6	5	6	6	30.9	30.9	30.9	44.643	427	427;427	0	85.919	By MS/MS	By MS/MS
MSMEG_2335|MSMEG_2335|hexapeptide;MSMEG_1055|MSMEG_1055|hexapeptide	MSMEG_2335|MSMEG_2335|hexapeptide;MSMEG_1055|MSMEG_1055|hexapeptide	4;4	4;4	4;4	MSMEG_2335|MSMEG_2335|hexapeptide transferase family protein|247 AA;MSMEG_1055|MSMEG_1055|hexapeptide transferase family protein|247 AA	2	4	4	4	1	1	2	4	1	1	2	2	2	2	1	1	2	4	1	1	2	2	2	2	1	1	2	4	1	1	2	2	2	2	18.6	18.6	18.6	27.786	247	247;247	0	21.578	By MS/MS	By matching
MSMEG_1060|MSMEG_1060|putative	MSMEG_1060|MSMEG_1060|putative	4	4	4	MSMEG_1060|MSMEG_1060|putative Lsr2 protein|134 AA	1	4	4	4	3	4	4	4	4	4	3	4	4	4	3	4	4	4	4	4	3	4	4	4	3	4	4	4	4	4	3	4	4	4	29.1	29.1	29.1	14.361	134	134	0	84.392	By MS/MS	By MS/MS
MSMEG_1061|MSMEG_1061|phosphohydrolase|204	MSMEG_1061|MSMEG_1061|phosphohydrolase|204	2	2	2	MSMEG_1061|MSMEG_1061|phosphohydrolase|204 AA	1	2	2	2	2	2	2	2	2	1	2	2	2	2	2	2	2	2	2	1	2	2	2	2	2	2	2	2	2	1	2	2	2	2	20.1	20.1	20.1	22.735	204	204	0.001373	2.5558	By MS/MS	By matching
MSMEG_1063|MSMEG_1063|conserved	MSMEG_1063|MSMEG_1063|conserved	2	2	2	MSMEG_1063|MSMEG_1063|conserved hypothetical protein|107 AA	1	2	2	2	2	2	2	2	2	2	2	2	2	2	2	2	2	2	2	2	2	2	2	2	2	2	2	2	2	2	2	2	2	2	25.2	25.2	25.2	12.02	107	107	0	19.253	By MS/MS	By MS/MS
MSMEG_1066|MSMEG_1066|conserved	MSMEG_1066|MSMEG_1066|conserved	4	4	4	MSMEG_1066|MSMEG_1066|conserved hypothetical protein|103 AA	1	4	4	4	2	4	3	3	3	3	3	4	3	3	2	4	3	3	3	3	3	4	3	3	2	4	3	3	3	3	3	4	3	3	57.3	57.3	57.3	11.385	103	103	0	71.868	By MS/MS	By MS/MS
MSMEG_1072|speB|agmatinase|323	MSMEG_1072|speB|agmatinase|323	2	2	2	MSMEG_1072|speB|agmatinase|323 AA	1	2	2	2	2	2	2	2	1	2	2	1	1	1	2	2	2	2	1	2	2	1	1	1	2	2	2	2	1	2	2	1	1	1	6.2	6.2	6.2	34.536	323	323	0	3.8896	By matching	By MS/MS
MSMEG_1073|MSMEG_1073|oxidoreductase,	MSMEG_1073|MSMEG_1073|oxidoreductase,	1	1	1	MSMEG_1073|MSMEG_1073|oxidoreductase, short-chain dehydrogenase/reductase family protein|304 AA	1	1	1	1	1	1	1	1	1	1	0	1	1	1	1	1	1	1	1	1	0	1	1	1	1	1	1	1	1	1	0	1	1	1	5.3	5.3	5.3	32.474	304	304	0	10.919	By matching	By matching
MSMEG_1074|MSMEG_1074|polysaccharide	MSMEG_1074|MSMEG_1074|polysaccharide	1	1	1	MSMEG_1074|MSMEG_1074|polysaccharide deacetylase|287 AA	1	1	1	1	0	0	0	1	0	0	1	1	0	1	0	0	0	1	0	0	1	1	0	1	0	0	0	1	0	0	1	1	0	1	3.8	3.8	3.8	31.528	287	287	0.001824	2.4569
MSMEG_1075|menB|naphthoate	MSMEG_1075|menB|naphthoate	13	13	13	MSMEG_1075|menB|naphthoate synthase|309 AA	1	13	13	13	9	12	12	12	12	12	12	12	13	12	9	12	12	12	12	12	12	12	13	12	9	12	12	12	12	12	12	12	13	12	62.8	62.8	62.8	34.303	309	309	0	323.31	By MS/MS	By MS/MS
MSMEG_1076|MSMEG_1076|conserved	MSMEG_1076|MSMEG_1076|conserved	2	2	2	MSMEG_1076|MSMEG_1076|conserved hypothetical protein|91 AA	1	2	2	2	2	2	2	2	2	2	2	2	2	2	2	2	2	2	2	2	2	2	2	2	2	2	2	2	2	2	2	2	2	2	27.5	27.5	27.5	9.5498	91	91	0	90.169	By MS/MS	By MS/MS
MSMEG_1077|MSMEG_1077|conserved	MSMEG_1077|MSMEG_1077|conserved	3	3	3	MSMEG_1077|MSMEG_1077|conserved hypothetical protein|149 AA	1	3	3	3	2	2	3	3	2	3	3	3	3	3	2	2	3	3	2	3	3	3	3	3	2	2	3	3	2	3	3	3	3	3	32.9	32.9	32.9	16.291	149	149	0	5.5262	By MS/MS	By matching
MSMEG_1078|MSMEG_1078|hydrolase|229	MSMEG_1078|MSMEG_1078|hydrolase|229	3	3	3	MSMEG_1078|MSMEG_1078|hydrolase|229 AA	1	3	3	3	2	2	2	3	3	3	1	3	3	3	2	2	2	3	3	3	1	3	3	3	2	2	2	3	3	3	1	3	3	3	20.1	20.1	20.1	24.864	229	229	0	50.103	By MS/MS	By matching
MSMEG_1089|MSMEG_1089|hypothetical	MSMEG_1089|MSMEG_1089|hypothetical	4	4	4	MSMEG_1089|MSMEG_1089|hypothetical protein|63 AA	1	4	4	4	3	4	3	3	3	2	3	4	3	3	3	4	3	3	3	2	3	4	3	3	3	4	3	3	3	2	3	4	3	3	92.1	92.1	92.1	6.8186	63	63	0	22.712	By MS/MS	By MS/MS
MSMEG_1090|MSMEG_1090|amidase|468	MSMEG_1090|MSMEG_1090|amidase|468	10	10	10	MSMEG_1090|MSMEG_1090|amidase|468 AA	1	10	10	10	8	6	7	8	8	5	10	7	9	9	8	6	7	8	8	5	10	7	9	9	8	6	7	8	8	5	10	7	9	9	36.5	36.5	36.5	49.193	468	468	0	55.294	By MS/MS	By MS/MS
MSMEG_1097|MSMEG_1097|glycosyl	MSMEG_1097|MSMEG_1097|glycosyl	5	5	5	MSMEG_1097|MSMEG_1097|glycosyl transferase, group 2 family protein|227 AA	1	5	5	5	4	4	5	5	5	4	4	4	5	5	4	4	5	5	5	4	4	4	5	5	4	4	5	5	5	4	4	4	5	5	22.5	22.5	22.5	24	227	227	0	11.06	By MS/MS	By MS/MS
MSMEG_1098|MSMEG_1098|acyl-CoA	MSMEG_1098|MSMEG_1098|acyl-CoA	7	7	7	MSMEG_1098|MSMEG_1098|acyl-CoA synthase|539 AA	1	7	7	7	3	1	4	3	5	4	5	4	5	5	3	1	4	3	5	4	5	4	5	5	3	1	4	3	5	4	5	4	5	5	22.6	22.6	22.6	58.201	539	539	0	12.457	By MS/MS	By MS/MS
MSMEG_1108|MSMEG_1108|hydrolase,	MSMEG_1108|MSMEG_1108|hydrolase,	5	5	5	MSMEG_1108|MSMEG_1108|hydrolase, alpha/beta fold family protein|292 AA	1	5	5	5	4	4	4	5	4	4	4	5	5	4	4	4	4	5	4	4	4	5	5	4	4	4	4	5	4	4	4	5	5	4	24.7	24.7	24.7	32.15	292	292	0	14.164	By MS/MS	By MS/MS
MSMEG_1109|MSMEG_1109|2-oxoglutarate	MSMEG_1109|MSMEG_1109|2-oxoglutarate	6	6	6	MSMEG_1109|MSMEG_1109|2-oxoglutarate decarboxylase|547 AA	1	6	6	6	4	4	6	5	4	4	4	5	5	6	4	4	6	5	4	4	4	5	5	6	4	4	6	5	4	4	4	5	5	6	18.6	18.6	18.6	56.991	547	547	0	31.513	By MS/MS	By MS/MS
MSMEG_1112|MSMEG_1112|aconitate	MSMEG_1112|MSMEG_1112|aconitate	6	6	6	MSMEG_1112|MSMEG_1112|aconitate hydratase, putative|654 AA	1	6	6	6	3	4	4	6	3	4	3	4	6	5	3	4	4	6	3	4	3	4	6	5	3	4	4	6	3	4	3	4	6	5	16.5	16.5	16.5	70.768	654	654	0	24.063	By matching	By MS/MS
MSMEG_1114|MSMEG_1114|short	MSMEG_1114|MSMEG_1114|short	5	5	5	MSMEG_1114|MSMEG_1114|short chain dehydrogenase|274 AA	1	5	5	5	3	1	4	4	2	2	3	4	2	2	3	1	4	4	2	2	3	4	2	2	3	1	4	4	2	2	3	4	2	2	28.1	28.1	28.1	29.756	274	274	0	5.9934	By matching	By MS/MS
MSMEG_1120|MSMEG_1120|nitrilase/cyanide	MSMEG_1120|MSMEG_1120|nitrilase/cyanide	2	2	2	MSMEG_1120|MSMEG_1120|nitrilase/cyanide hydratase and apolipoprotein N-acyltransferase|325 AA	1	2	2	2	1	1	1	1	1	1	1	1	2	2	1	1	1	1	1	1	1	1	2	2	1	1	1	1	1	1	1	1	2	2	7.7	7.7	7.7	35.395	325	325	0	8.9241	By matching	By matching
MSMEG_1124|FdxA|putative	MSMEG_1124|FdxA|putative	2	2	2	MSMEG_1124|FdxA|putative ferredoxin FdxA|114 AA	1	2	2	2	2	2	2	2	2	2	2	2	2	2	2	2	2	2	2	2	2	2	2	2	2	2	2	2	2	2	2	2	2	2	21.9	21.9	21.9	12.382	114	114	0	75.107	By MS/MS	By MS/MS
MSMEG_1131|MSMEG_1131|tryptophan-rich	MSMEG_1131|MSMEG_1131|tryptophan-rich	1	1	1	MSMEG_1131|MSMEG_1131|tryptophan-rich sensory protein|161 AA	1	1	1	1	0	0	0	0	0	0	1	0	0	1	0	0	0	0	0	0	1	0	0	1	0	0	0	0	0	0	1	0	0	1	12.4	12.4	12.4	17.323	161	161	0.0013812	2.6606
MSMEG_1133|MSMEG_1133|bifunctional	MSMEG_1133|MSMEG_1133|bifunctional	9	9	9	MSMEG_1133|MSMEG_1133|bifunctional short chain isoprenyl diphosphate synthase|329 AA	1	9	9	9	3	5	5	7	6	5	6	5	7	7	3	5	5	7	6	5	6	5	7	7	3	5	5	7	6	5	6	5	7	7	36.5	36.5	36.5	35.41	329	329	0	30.134	By MS/MS	By MS/MS
MSMEG_1136|MSMEG_1136|conserved	MSMEG_1136|MSMEG_1136|conserved	4	4	4	MSMEG_1136|MSMEG_1136|conserved hypothetical protein|174 AA	1	4	4	4	3	3	2	4	2	3	2	3	3	4	3	3	2	4	2	3	2	3	3	4	3	3	2	4	2	3	2	3	3	4	69	69	69	17.56	174	174	0	73.772	By MS/MS	By MS/MS
MSMEG_1138|MSMEG_1138|alcohol	MSMEG_1138|MSMEG_1138|alcohol	1	1	1	MSMEG_1138|MSMEG_1138|alcohol dehydrogenase 1|378 AA	1	1	1	1	1	1	1	1	1	1	1	1	1	1	1	1	1	1	1	1	1	1	1	1	1	1	1	1	1	1	1	1	1	1	4.2	4.2	4.2	38.502	378	378	0	3.5268	By matching	By MS/MS
MSMEG_1154|MSMEG_1154|formyl-coenzyme	MSMEG_1154|MSMEG_1154|formyl-coenzyme	3	3	3	MSMEG_1154|MSMEG_1154|formyl-coenzyme A transferase|393 AA	1	3	3	3	1	1	2	3	3	1	2	2	3	3	1	1	2	3	3	1	2	2	3	3	1	1	2	3	3	1	2	2	3	3	12.5	12.5	12.5	43.592	393	393	0	13.349	By MS/MS	By MS/MS
MSMEG_1156|MSMEG_1156|dihydrodipicolinate	MSMEG_1156|MSMEG_1156|dihydrodipicolinate	1	1	1	MSMEG_1156|MSMEG_1156|dihydrodipicolinate synthetase|295 AA	1	1	1	1	0	1	0	0	0	1	0	1	0	1	0	1	0	0	0	1	0	1	0	1	0	1	0	0	0	1	0	1	0	1	4.4	4.4	4.4	30.766	295	295	0.0075088	1.9266		By MS/MS
MSMEG_1157|MSMEG_1157|short	MSMEG_1157|MSMEG_1157|short	5	5	5	MSMEG_1157|MSMEG_1157|short chain dehydrogenase|257 AA	1	5	5	5	3	2	3	2	4	2	2	2	2	3	3	2	3	2	4	2	2	2	2	3	3	2	3	2	4	2	2	2	2	3	30	30	30	26.247	257	257	0	12.961	By MS/MS	By MS/MS
MSMEG_1165|MSMEG_1165|conserved	MSMEG_1165|MSMEG_1165|conserved	11	11	11	MSMEG_1165|MSMEG_1165|conserved hypothetical protein|163 AA	1	11	11	11	9	11	10	10	9	9	9	10	10	10	9	11	10	10	9	9	9	10	10	10	9	11	10	10	9	9	9	10	10	10	63.2	63.2	63.2	18.092	163	163	0	152.81	By MS/MS	By MS/MS
MSMEG_1174|MSMEG_1174|cadmium	MSMEG_1174|MSMEG_1174|cadmium	1	1	1	MSMEG_1174|MSMEG_1174|cadmium inducible protein cadi|154 AA	1	1	1	1	1	1	1	1	1	1	1	1	1	1	1	1	1	1	1	1	1	1	1	1	1	1	1	1	1	1	1	1	1	1	5.8	5.8	5.8	16.343	154	154	0.0066756	2.0227	By matching	By MS/MS
MSMEG_1179|hutU|urocanate	MSMEG_1179|hutU|urocanate	6	6	6	MSMEG_1179|hutU|urocanate hydratase|552 AA	1	6	6	6	2	4	4	6	5	5	5	3	4	5	2	4	4	6	5	5	5	3	4	5	2	4	4	6	5	5	5	3	4	5	15.2	15.2	15.2	60.117	552	552	0	14.665	By matching	By MS/MS
MSMEG_1180|MSMEG_1180|N-carbamoyl-L-amino	MSMEG_1180|MSMEG_1180|N-carbamoyl-L-amino	4	4	4	MSMEG_1180|MSMEG_1180|N-carbamoyl-L-amino acid hydrolase|404 AA	1	4	4	4	3	1	2	4	3	2	3	3	4	3	3	1	2	4	3	2	3	3	4	3	3	1	2	4	3	2	3	3	4	3	16.6	16.6	16.6	42.532	404	404	0	18.54	By MS/MS	By MS/MS
MSMEG_1181|hutF|formiminoglutamate	MSMEG_1181|hutF|formiminoglutamate	2	2	2	MSMEG_1181|hutF|formiminoglutamate deiminase|443 AA	1	2	2	2	0	0	0	1	1	0	0	0	1	0	0	0	0	1	1	0	0	0	1	0	0	0	0	1	1	0	0	0	1	0	8.8	8.8	8.8	46.616	443	443	0	4.969
MSMEG_1182|hutI|imidazolonepropionase|396	MSMEG_1182|hutI|imidazolonepropionase|396	4	4	4	MSMEG_1182|hutI|imidazolonepropionase|396 AA	1	4	4	4	3	3	3	2	3	2	3	3	4	4	3	3	3	2	3	2	3	3	4	4	3	3	3	2	3	2	3	3	4	4	14.1	14.1	14.1	41.33	396	396	0	7.0962	By matching	By matching
MSMEG_1183|hutH|histidine	MSMEG_1183|hutH|histidine	8	8	8	MSMEG_1183|hutH|histidine ammonia-lyase|514 AA	1	8	8	8	5	5	6	5	6	5	3	6	6	7	5	5	6	5	6	5	3	6	6	7	5	5	6	5	6	5	3	6	6	7	31.3	31.3	31.3	53.388	514	514	0	36.643	By MS/MS	By MS/MS
MSMEG_1184|MSMEG_1184|serine	MSMEG_1184|MSMEG_1184|serine	4	4	4	MSMEG_1184|MSMEG_1184|serine esterase, cutinase family protein|292 AA	1	4	4	4	0	2	1	0	1	4	0	1	1	2	0	2	1	0	1	4	0	1	1	2	0	2	1	0	1	4	0	1	1	2	27.7	27.7	27.7	29.633	292	292	0	35.104		By MS/MS
MSMEG_1188|MSMEG_1188|conserved	MSMEG_1188|MSMEG_1188|conserved	2	2	2	MSMEG_1188|MSMEG_1188|conserved hypothetical protein|635 AA	1	2	2	2	2	2	2	2	2	2	2	2	2	2	2	2	2	2	2	2	2	2	2	2	2	2	2	2	2	2	2	2	2	2	5.7	5.7	5.7	63.183	635	635	0	11.714	By matching	By MS/MS
MSMEG_1191|MSMEG_1191|hypothetical	MSMEG_1191|MSMEG_1191|hypothetical	2	2	2	MSMEG_1191|MSMEG_1191|hypothetical protein|73 AA	1	2	2	2	2	2	2	2	2	2	2	2	2	2	2	2	2	2	2	2	2	2	2	2	2	2	2	2	2	2	2	2	2	2	31.5	31.5	31.5	7.6679	73	73	0	5.2238	By matching	By matching
MSMEG_1200|MSMEG_1200|serine/threonine-protein	MSMEG_1200|MSMEG_1200|serine/threonine-protein	3	3	3	MSMEG_1200|MSMEG_1200|serine/threonine-protein kinase PknD|608 AA	1	3	3	3	0	1	2	2	1	1	2	2	1	1	0	1	2	2	1	1	2	2	1	1	0	1	2	2	1	1	2	2	1	1	8.2	8.2	8.2	64.918	608	608	0	3.9282		By matching
MSMEG_1204|MSMEG_1204|3-oxoacyl-[acyl-carrier-protein]	MSMEG_1204|MSMEG_1204|3-oxoacyl-[acyl-carrier-protein]	2	2	2	MSMEG_1204|MSMEG_1204|3-oxoacyl-[acyl-carrier-protein] synthase 2|416 AA	1	2	2	2	0	1	1	1	1	0	0	1	2	1	0	1	1	1	1	0	0	1	2	1	0	1	1	1	1	0	0	1	2	1	8.9	8.9	8.9	43.883	416	416	0	8.2582		By matching
MSMEG_1215|MSMEG_1215|serine/threonine-protein	MSMEG_1215|MSMEG_1215|serine/threonine-protein	7	7	7	MSMEG_1215|MSMEG_1215|serine/threonine-protein kinase PknE, putative|212 AA	1	7	7	7	4	5	5	6	5	5	5	7	7	5	4	5	5	6	5	5	5	7	7	5	4	5	5	6	5	5	5	7	7	5	44.3	44.3	44.3	22.678	212	212	0	49.322	By MS/MS	By MS/MS
MSMEG_1216|MSMEG_1216|ABC-type	MSMEG_1216|MSMEG_1216|ABC-type	4	4	4	MSMEG_1216|MSMEG_1216|ABC-type transport system periplasmic substrate-binding protein|431 AA	1	4	4	4	3	3	4	4	4	4	4	3	4	3	3	3	4	4	4	4	4	3	4	3	3	3	4	4	4	4	4	3	4	3	13.7	13.7	13.7	44.535	431	431	0	13.201	By MS/MS	By MS/MS
MSMEG_1221|MSMEG_1221|rifampin	MSMEG_1221|MSMEG_1221|rifampin	1	1	1	MSMEG_1221|MSMEG_1221|rifampin ADP-ribosyl transferase|142 AA	1	1	1	1	0	1	1	0	1	0	1	1	1	1	0	1	1	0	1	0	1	1	1	1	0	1	1	0	1	0	1	1	1	1	13.4	13.4	13.4	15.758	142	142	0	8.307		By MS/MS
MSMEG_1226|MSMEG_1226|sulfatase-modifying;MSMEG_1452|MSMEG_1452|sulfatase-modifying	MSMEG_1226|MSMEG_1226|sulfatase-modifying	3;1	3;1	3;1	MSMEG_1226|MSMEG_1226|sulfatase-modifying factor 1|291 AA	2	3	3	3	2	1	0	1	0	0	3	0	0	2	2	1	0	1	0	0	3	0	0	2	2	1	0	1	0	0	3	0	0	2	23.4	23.4	23.4	31.71	291	291;296	0	5.8695	By matching	By matching
MSMEG_1236|MSMEG_1236|Mpr	MSMEG_1236|MSMEG_1236|Mpr	4	4	4	MSMEG_1236|MSMEG_1236|Mpr protein|215 AA	1	4	4	4	3	2	2	3	2	2	2	4	2	2	3	2	2	3	2	2	2	4	2	2	3	2	2	3	2	2	2	4	2	2	22.3	22.3	22.3	22.959	215	215	0	63.248	By MS/MS	By MS/MS
MSMEG_1237|MSMEG_1237|hypothetical	MSMEG_1237|MSMEG_1237|hypothetical	2	2	2	MSMEG_1237|MSMEG_1237|hypothetical protein|105 AA	1	2	2	2	2	0	0	0	0	0	1	2	1	2	2	0	0	0	0	0	1	2	1	2	2	0	0	0	0	0	1	2	1	2	26.7	26.7	26.7	11.052	105	105	0	3.6472	By matching
MSMEG_1238|MSMEG_1238|type	MSMEG_1238|MSMEG_1238|type	1	1	1	MSMEG_1238|MSMEG_1238|type III restriction enzyme, res subunit|566 AA	1	1	1	1	1	0	1	1	0	0	0	1	1	0	1	0	1	1	0	0	0	1	1	0	1	0	1	1	0	0	0	1	1	0	2.5	2.5	2.5	63.486	566	566	0	4.9705	By matching
MSMEG_1242|iscS|cysteine	MSMEG_1242|iscS|cysteine	9	9	9	MSMEG_1242|iscS|cysteine desulfurase IscS|386 AA	1	9	9	9	8	8	8	7	7	7	6	9	8	7	8	8	8	7	7	7	6	9	8	7	8	8	8	7	7	7	6	9	8	7	27.7	27.7	27.7	39.345	386	386	0	129.72	By MS/MS	By MS/MS
MSMEG_1244|MSMEG_1244|conserved	MSMEG_1244|MSMEG_1244|conserved	3	3	3	MSMEG_1244|MSMEG_1244|conserved hypothetical protein|1152 AA	1	3	3	3	1	3	1	2	1	1	1	2	1	2	1	3	1	2	1	1	1	2	1	2	1	3	1	2	1	1	1	2	1	2	3.2	3.2	3.2	126.16	1152	1152	0	2.9947	By MS/MS	By matching
MSMEG_1245|MSMEG_1245|phosphoadenosine	MSMEG_1245|MSMEG_1245|phosphoadenosine	2	2	2	MSMEG_1245|MSMEG_1245|phosphoadenosine phosphosulfate reductase|282 AA	1	2	2	2	2	2	2	2	2	2	2	2	2	2	2	2	2	2	2	2	2	2	2	2	2	2	2	2	2	2	2	2	2	2	6	6	6	32.053	282	282	0	5.3097	By matching	By matching
MSMEG_1252|MSMEG_1252|conserved	MSMEG_1252|MSMEG_1252|conserved	5	5	5	MSMEG_1252|MSMEG_1252|conserved hypothetical protein|2058 AA	1	5	5	5	2	2	2	2	1	1	2	1	2	3	2	2	2	2	1	1	2	1	2	3	2	2	2	2	1	1	2	1	2	3	3.4	3.4	3.4	224.58	2058	2058	0	6.5524	By matching	By MS/MS
MSMEG_1255|MSMEG_1255|UvrD/Rep	MSMEG_1255|MSMEG_1255|UvrD/Rep	6	6	6	MSMEG_1255|MSMEG_1255|UvrD/Rep helicase|737 AA	1	6	6	6	4	4	4	3	5	4	6	4	4	5	4	4	4	3	5	4	6	4	4	5	4	4	4	3	5	4	6	4	4	5	10.3	10.3	10.3	80.802	737	737	0	49.879	By MS/MS	By matching
MSMEG_1260|MSMEG_1260|hypothetical	MSMEG_1260|MSMEG_1260|hypothetical	5	5	5	MSMEG_1260|MSMEG_1260|hypothetical protein|455 AA	1	5	5	5	3	3	5	3	2	2	1	3	3	3	3	3	5	3	2	2	1	3	3	3	3	3	5	3	2	2	1	3	3	3	13.4	13.4	13.4	49.682	455	455	0	17.757	By MS/MS	By MS/MS
MSMEG_1261|MSMEG_1261|hypothetical	MSMEG_1261|MSMEG_1261|hypothetical	2	2	2	MSMEG_1261|MSMEG_1261|hypothetical protein|360 AA	1	2	2	2	2	2	2	2	2	1	2	2	2	1	2	2	2	2	2	1	2	2	2	1	2	2	2	2	2	1	2	2	2	1	5.6	5.6	5.6	38.613	360	360	0	23.449	By matching	By MS/MS
MSMEG_1264|MSMEG_1264|prophage	MSMEG_1264|MSMEG_1264|prophage	2	2	2	MSMEG_1264|MSMEG_1264|prophage Lp1 protein 5|132 AA	1	2	2	2	1	2	2	2	2	2	2	2	2	2	1	2	2	2	2	2	2	2	2	2	1	2	2	2	2	2	2	2	2	2	29.5	29.5	29.5	14.274	132	132	0	44.436	By matching	By MS/MS
MSMEG_1265|MSMEG_1265|conserved	MSMEG_1265|MSMEG_1265|conserved	15	15	15	MSMEG_1265|MSMEG_1265|conserved hypothetical protein|512 AA	1	15	15	15	10	7	11	12	12	10	11	12	12	12	10	7	11	12	12	10	11	12	12	12	10	7	11	12	12	10	11	12	12	12	38.1	38.1	38.1	56.797	512	512	0	49.632	By MS/MS	By MS/MS
MSMEG_1277|MSMEG_1277|hypothetical	MSMEG_1277|MSMEG_1277|hypothetical	1	1	1	MSMEG_1277|MSMEG_1277|hypothetical protein|65 AA	1	1	1	1	0	1	1	1	1	1	1	1	1	1	0	1	1	1	1	1	1	1	1	1	0	1	1	1	1	1	1	1	1	1	24.6	24.6	24.6	7.2762	65	65	0	34.397		By MS/MS
MSMEG_1278|MSMEG_1278|death-on-curing	MSMEG_1278|MSMEG_1278|death-on-curing	2	2	2	MSMEG_1278|MSMEG_1278|death-on-curing protein|130 AA	1	2	2	2	0	0	0	0	0	0	0	0	1	2	0	0	0	0	0	0	0	0	1	2	0	0	0	0	0	0	0	0	1	2	23.8	23.8	23.8	13.971	130	130	0.00093284	2.8375
MSMEG_1279|MSMEG_1279|conserved	MSMEG_1279|MSMEG_1279|conserved	1	1	1	MSMEG_1279|MSMEG_1279|conserved hypothetical protein|476 AA	1	1	1	1	0	1	0	1	1	0	1	1	1	1	0	1	0	1	1	0	1	1	1	1	0	1	0	1	1	0	1	1	1	1	1.5	1.5	1.5	53.431	476	476	0.0096534	1.8649		By matching
MSMEG_1283|MSMEG_1283|probable	MSMEG_1283|MSMEG_1283|probable	1	1	1	MSMEG_1283|MSMEG_1283|probable ribbon-helix-helix transcription factor, family protein|84 AA	1	1	1	1	1	1	1	1	1	1	1	1	1	0	1	1	1	1	1	1	1	1	1	0	1	1	1	1	1	1	1	1	1	0	13.1	13.1	13.1	9.2796	84	84	0	7.0401	By matching	By matching
MSMEG_1285|MSMEG_1285|tetratricopeptide	MSMEG_1285|MSMEG_1285|tetratricopeptide	16	16	16	MSMEG_1285|MSMEG_1285|tetratricopeptide repeat family protein|801 AA	1	16	16	16	11	13	11	14	12	14	13	14	13	15	11	13	11	14	12	14	13	14	13	15	11	13	11	14	12	14	13	14	13	15	36.5	36.5	36.5	88	801	801	0	150.01	By MS/MS	By MS/MS
MSMEG_1286|MSMEG_1286|sulfatase	MSMEG_1286|MSMEG_1286|sulfatase	2	2	2	MSMEG_1286|MSMEG_1286|sulfatase family protein|586 AA	1	2	2	2	2	2	2	2	1	2	2	0	2	1	2	2	2	2	1	2	2	0	2	1	2	2	2	2	1	2	2	0	2	1	4.9	4.9	4.9	65.298	586	586	0.0018265	2.4642	By matching	By matching
MSMEG_1291|MSMEG_1291|putative	MSMEG_1291|MSMEG_1291|putative	9	9	9	MSMEG_1291|MSMEG_1291|putative oxidoreductase|893 AA	1	9	9	9	3	4	4	4	4	3	4	5	6	8	3	4	4	4	4	3	4	5	6	8	3	4	4	4	4	3	4	5	6	8	15.3	15.3	15.3	95.099	893	893	0	56.717	By matching	By MS/MS
MSMEG_1294|MSMEG_1294|allantoicase|168	MSMEG_1294|MSMEG_1294|allantoicase|168	3	3	3	MSMEG_1294|MSMEG_1294|allantoicase|168 AA	1	3	3	3	2	2	2	2	3	3	2	2	2	3	2	2	2	2	3	3	2	2	2	3	2	2	2	2	3	3	2	2	2	3	22	22	22	18.798	168	168	0	17.429	By matching	By MS/MS
MSMEG_1296|MSMEG_1296|uricase|299	MSMEG_1296|MSMEG_1296|uricase|299	7	7	7	MSMEG_1296|MSMEG_1296|uricase|299 AA	1	7	7	7	2	3	4	4	5	2	5	6	6	6	2	3	4	4	5	2	5	6	6	6	2	3	4	4	5	2	5	6	6	6	30.4	30.4	30.4	33.499	299	299	0	41.421	By matching	By MS/MS
MSMEG_1322|MSMEG_1322|ErfK/YbiS/YcfS/YnhG	MSMEG_1322|MSMEG_1322|ErfK/YbiS/YcfS/YnhG	1	1	1	MSMEG_1322|MSMEG_1322|ErfK/YbiS/YcfS/YnhG family protein|420 AA	1	1	1	1	1	0	0	1	1	1	0	0	0	1	1	0	0	1	1	1	0	0	0	1	1	0	0	1	1	1	0	0	0	1	6	6	6	45.095	420	420	0.0031689	2.3054	By matching
MSMEG_1325|recD|exodeoxyribonuclease	MSMEG_1325|recD|exodeoxyribonuclease	2	2	2	MSMEG_1325|recD|exodeoxyribonuclease V, alpha subunit|554 AA	1	2	2	2	0	1	1	1	1	1	1	1	2	1	0	1	1	1	1	1	1	1	2	1	0	1	1	1	1	1	1	1	2	1	4.9	4.9	4.9	59.515	554	554	0	5.8858		By matching
MSMEG_1327|recB|exodeoxyribonuclease	MSMEG_1327|recB|exodeoxyribonuclease	3	3	3	MSMEG_1327|recB|exodeoxyribonuclease V, beta subunit|1083 AA	1	3	3	3	0	0	0	3	2	0	2	2	3	2	0	0	0	3	2	0	2	2	3	2	0	0	0	3	2	0	2	2	3	2	2.9	2.9	2.9	117.44	1083	1083	0	4.6087
MSMEG_1328|recC|exodeoxyribonuclease	MSMEG_1328|recC|exodeoxyribonuclease	6	6	6	MSMEG_1328|recC|exodeoxyribonuclease V, gamma subunit|1087 AA	1	6	6	6	3	4	2	5	4	3	4	5	5	5	3	4	2	5	4	3	4	5	5	5	3	4	2	5	4	3	4	5	5	5	7.1	7.1	7.1	120.57	1087	1087	0	12.027	By matching	By matching
MSMEG_1331|MSMEG_1331|enoyl-CoA	MSMEG_1331|MSMEG_1331|enoyl-CoA	4	4	4	MSMEG_1331|MSMEG_1331|enoyl-CoA hydratase|235 AA	1	4	4	4	2	3	3	3	3	3	2	4	3	3	2	3	3	3	3	3	2	4	3	3	2	3	3	3	3	3	2	4	3	3	29.8	29.8	29.8	23.876	235	235	0	67.29	By MS/MS	By MS/MS
MSMEG_1334|MSMEG_1334|metallo-beta-lactamase	MSMEG_1334|MSMEG_1334|metallo-beta-lactamase	7	7	7	MSMEG_1334|MSMEG_1334|metallo-beta-lactamase family protein|245 AA	1	7	7	7	4	6	5	5	4	5	6	5	6	7	4	6	5	5	4	5	6	5	6	7	4	6	5	5	4	5	6	5	6	7	35.5	35.5	35.5	26.602	245	245	0	32.113	By MS/MS	By MS/MS
MSMEG_1339|rpmG|ribosomal	MSMEG_1339|rpmG|ribosomal	2	2	2	MSMEG_1339|rpmG|ribosomal protein L33|55 AA	1	2	2	2	2	2	2	2	2	2	2	2	2	2	2	2	2	2	2	2	2	2	2	2	2	2	2	2	2	2	2	2	2	2	32.7	32.7	32.7	6.4524	55	55	0	4.3034	By MS/MS	By MS/MS
MSMEG_1340|MSMEG_1340|conserved	MSMEG_1340|MSMEG_1340|conserved	5	5	5	MSMEG_1340|MSMEG_1340|conserved hypothetical protein|158 AA	1	5	5	5	3	5	4	4	3	4	5	4	4	4	3	5	4	4	3	4	5	4	4	4	3	5	4	4	3	4	5	4	4	4	38	38	38	17.583	158	158	0	64.822	By MS/MS	By MS/MS
MSMEG_1341|MSMEG_1341|MaoC	MSMEG_1341|MSMEG_1341|MaoC	4	4	4	MSMEG_1341|MSMEG_1341|MaoC family protein|142 AA	1	4	4	4	3	3	4	4	4	3	3	4	4	4	3	3	4	4	4	3	3	4	4	4	3	3	4	4	4	3	3	4	4	4	46.5	46.5	46.5	14.858	142	142	0	26.272	By MS/MS	By MS/MS
MSMEG_1342|MSMEG_1342|conserved	MSMEG_1342|MSMEG_1342|conserved	3	3	3	MSMEG_1342|MSMEG_1342|conserved hypothetical protein|169 AA	1	3	3	3	3	2	3	2	3	2	1	3	3	3	3	2	3	2	3	2	1	3	3	3	3	2	3	2	3	2	1	3	3	3	16.6	16.6	16.6	18.801	169	169	0	6.5149	By MS/MS	By MS/MS
MSMEG_1344|MSMEG_1344|translocase|144	MSMEG_1344|MSMEG_1344|translocase|144	3	3	3	MSMEG_1344|MSMEG_1344|translocase|144 AA	1	3	3	3	2	3	3	3	3	3	3	3	1	3	2	3	3	3	3	3	3	3	1	3	2	3	3	3	3	3	3	3	1	3	22.2	22.2	22.2	15.286	144	144	0	32.288	By matching	By MS/MS
MSMEG_1345|MSMEG_1345|transcription	MSMEG_1345|MSMEG_1345|transcription	10	10	10	MSMEG_1345|MSMEG_1345|transcription antitermination protein NusG|280 AA	1	10	10	10	9	8	8	9	10	10	9	9	8	10	9	8	8	9	10	10	9	9	8	10	9	8	8	9	10	10	9	9	8	10	36.1	36.1	36.1	29.839	280	280	0	55.996	By MS/MS	By MS/MS
MSMEG_1346|rplK|ribosomal	MSMEG_1346|rplK|ribosomal	6	6	6	MSMEG_1346|rplK|ribosomal protein L11|142 AA	1	6	6	6	6	6	6	6	6	6	6	6	6	6	6	6	6	6	6	6	6	6	6	6	6	6	6	6	6	6	6	6	6	6	34.5	34.5	34.5	15.002	142	142	0	61.307	By MS/MS	By MS/MS
MSMEG_1347|rplA|ribosomal	MSMEG_1347|rplA|ribosomal	13	13	13	MSMEG_1347|rplA|ribosomal protein L1|235 AA	1	13	13	13	12	13	12	12	12	12	13	12	12	12	12	13	12	12	12	12	13	12	12	12	12	13	12	12	12	12	13	12	12	12	60	60	60	25.019	235	235	0	244.97	By MS/MS	By MS/MS
MSMEG_1349|MSMEG_1349|dgpf	MSMEG_1349|MSMEG_1349|dgpf	3	3	3	MSMEG_1349|MSMEG_1349|dgpf domain family protein|231 AA	1	3	3	3	3	3	3	3	3	2	3	3	3	3	3	3	3	3	3	2	3	3	3	3	3	3	3	3	3	2	3	3	3	3	16	16	16	24.447	231	231	0	5.2828	By MS/MS	By matching
MSMEG_1350|MSMEG_1350|cyclopropane-fatty-acyl-phospholipid	MSMEG_1350|MSMEG_1350|cyclopropane-fatty-acyl-phospholipid	5	4	4	MSMEG_1350|MSMEG_1350|cyclopropane-fatty-acyl-phospholipid synthase 1|286 AA	1	5	4	4	3	3	3	4	3	3	4	5	4	4	2	2	2	3	2	2	3	4	3	3	2	2	2	3	2	2	3	4	3	3	22.4	19.9	19.9	32.591	286	286	0	24.513	By MS/MS	By MS/MS
MSMEG_1353|MSMEG_1353|ABC1	MSMEG_1353|MSMEG_1353|ABC1	5	5	5	MSMEG_1353|MSMEG_1353|ABC1 family protein|473 AA	1	5	5	5	2	1	2	3	1	1	0	2	3	4	2	1	2	3	1	1	0	2	3	4	2	1	2	3	1	1	0	2	3	4	18	18	18	52.347	473	473	0	7.2642	By MS/MS	By matching
MSMEG_1356|MSMEG_1356|conserved	MSMEG_1356|MSMEG_1356|conserved	4	4	4	MSMEG_1356|MSMEG_1356|conserved hypothetical protein|203 AA	1	4	4	4	3	3	4	4	4	4	4	3	4	4	3	3	4	4	4	4	4	3	4	4	3	3	4	4	4	4	4	3	4	4	25.1	25.1	25.1	22.842	203	203	0	18.978	By MS/MS	By MS/MS
MSMEG_1363|MSMEG_1363|glucokinase|301	MSMEG_1363|MSMEG_1363|glucokinase|301	4	4	4	MSMEG_1363|MSMEG_1363|glucokinase|301 AA	1	4	4	4	1	1	1	4	1	1	2	1	2	3	1	1	1	4	1	1	2	1	2	3	1	1	1	4	1	1	2	1	2	3	25.6	25.6	25.6	30.175	301	301	0	14.842	By matching	By matching
MSMEG_1364|MSMEG_1364|50S	MSMEG_1364|MSMEG_1364|50S	12	12	12	MSMEG_1364|MSMEG_1364|50S ribosomal protein L10|175 AA	1	12	12	12	11	12	12	11	12	12	11	12	11	11	11	12	12	11	12	12	11	12	11	11	11	12	12	11	12	12	11	12	11	11	62.9	62.9	62.9	18.011	175	175	0	180.09	By MS/MS	By MS/MS
MSMEG_1365|rplL|ribosomal	MSMEG_1365|rplL|ribosomal	10	10	10	MSMEG_1365|rplL|ribosomal protein L7/L12|130 AA	1	10	10	10	7	9	9	9	9	9	8	10	10	9	7	9	9	9	9	9	8	10	10	9	7	9	9	9	9	9	8	10	10	9	82.3	82.3	82.3	13.458	130	130	0	137.61	By MS/MS	By MS/MS
MSMEG_1366|MSMEG_1366|ABC	MSMEG_1366|MSMEG_1366|ABC	4	4	4	MSMEG_1366|MSMEG_1366|ABC transporter, ATP-binding protein|360 AA	1	4	4	4	2	2	1	2	1	3	1	1	2	2	2	2	1	2	1	3	1	1	2	2	2	2	1	2	1	3	1	1	2	2	21.7	21.7	21.7	38.965	360	360	0	29.754	By matching	By matching
MSMEG_1367|rpoB|DNA-directed	MSMEG_1367|rpoB|DNA-directed	43	43	43	MSMEG_1367|rpoB|DNA-directed RNA polymerase, beta subunit|1169 AA	1	43	43	43	30	31	37	39	36	35	35	39	42	35	30	31	37	39	36	35	35	39	42	35	30	31	37	39	36	35	35	39	42	35	51.4	51.4	51.4	128.53	1169	1169	0	323.31	By MS/MS	By MS/MS
MSMEG_1368|rpoC|DNA-directed	MSMEG_1368|rpoC|DNA-directed	44	44	44	MSMEG_1368|rpoC|DNA-directed RNA polymerase, beta subunit|1317 AA	1	44	44	44	36	38	39	39	38	36	36	39	37	36	36	38	39	39	38	36	36	39	37	36	36	38	39	39	38	36	36	39	37	36	46.1	46.1	46.1	146.51	1317	1317	0	323.31	By MS/MS	By MS/MS
MSMEG_1370|MSMEG_1370|2-deoxy-scyllo-inosamine	MSMEG_1370|MSMEG_1370|2-deoxy-scyllo-inosamine	1	1	1	MSMEG_1370|MSMEG_1370|2-deoxy-scyllo-inosamine dehydrogenase|341 AA	1	1	1	1	0	1	0	0	0	0	0	0	0	0	0	1	0	0	0	0	0	0	0	0	0	1	0	0	0	0	0	0	0	0	3.2	3.2	3.2	35.598	341	341	0.004065	2.2642		By MS/MS
MSMEG_1371|MSMEG_1371|conserved	MSMEG_1371|MSMEG_1371|conserved	4	4	4	MSMEG_1371|MSMEG_1371|conserved hypothetical protein|333 AA	1	4	4	4	3	3	1	2	3	2	3	0	3	4	3	3	1	2	3	2	3	0	3	4	3	3	1	2	3	2	3	0	3	4	20.1	20.1	20.1	35.163	333	333	0	13.24	By matching	By MS/MS
MSMEG_1374|MSMEG_1374|ribose	MSMEG_1374|MSMEG_1374|ribose	7	7	7	MSMEG_1374|MSMEG_1374|ribose ABC transporter, periplasmic binding protein|348 AA	1	7	7	7	5	7	6	7	6	7	6	6	7	6	5	7	6	7	6	7	6	6	7	6	5	7	6	7	6	7	6	6	7	6	41.4	41.4	41.4	35.638	348	348	0	131.59	By MS/MS	By MS/MS
MSMEG_1375|MSMEG_1375|tagatose-1,6-bisphosphate	MSMEG_1375|MSMEG_1375|tagatose-1,6-bisphosphate	2	2	2	MSMEG_1375|MSMEG_1375|tagatose-1,6-bisphosphate aldolase GatY|280 AA	1	2	2	2	1	0	1	1	1	1	2	1	2	1	1	0	1	1	1	1	2	1	2	1	1	0	1	1	1	1	2	1	2	1	9.3	9.3	9.3	28.284	280	280	0	4.0581	By matching
MSMEG_1376|MSMEG_1376|putative	MSMEG_1376|MSMEG_1376|putative	7	7	7	MSMEG_1376|MSMEG_1376|putative xylulose kinase|415 AA	1	7	7	7	6	4	6	5	7	3	6	7	6	4	6	4	6	5	7	3	6	7	6	4	6	4	6	5	7	3	6	7	6	4	28.9	28.9	28.9	42.914	415	415	0	55.106	By MS/MS	By MS/MS
MSMEG_1378|MSMEG_1378|1-phosphofructokinase|305	MSMEG_1378|MSMEG_1378|1-phosphofructokinase|305	2	2	2	MSMEG_1378|MSMEG_1378|1-phosphofructokinase|305 AA	1	2	2	2	2	1	2	2	2	2	2	2	1	2	2	1	2	2	2	2	2	2	1	2	2	1	2	2	2	2	2	2	1	2	7.2	7.2	7.2	30.258	305	305	0	3.726	By MS/MS	By matching
MSMEG_1383|MSMEG_1383|endonuclease	MSMEG_1383|MSMEG_1383|endonuclease	5	5	5	MSMEG_1383|MSMEG_1383|endonuclease IV|250 AA	1	5	5	5	4	5	5	5	4	4	5	5	5	4	4	5	5	5	4	4	5	5	5	4	4	5	5	5	4	4	5	5	5	4	30.4	30.4	30.4	26.589	250	250	0	44.832	By MS/MS	By MS/MS
MSMEG_1384|MSMEG_1384|conserved	MSMEG_1384|MSMEG_1384|conserved	1	1	1	MSMEG_1384|MSMEG_1384|conserved hypothetical protein|133 AA	1	1	1	1	1	1	1	1	1	1	1	1	1	1	1	1	1	1	1	1	1	1	1	1	1	1	1	1	1	1	1	1	1	1	10.5	10.5	10.5	14.106	133	133	0	18.094	By MS/MS	By MS/MS
MSMEG_1387|MSMEG_1387|putative	MSMEG_1387|MSMEG_1387|putative	10	10	10	MSMEG_1387|MSMEG_1387|putative acyl-CoA dehydrogenase|551 AA	1	10	10	10	8	7	8	7	8	7	8	6	9	9	8	7	8	7	8	7	8	6	9	9	8	7	8	7	8	7	8	6	9	9	24.5	24.5	24.5	59.82	551	551	0	66.938	By MS/MS	By MS/MS
MSMEG_1393|MSMEG_1393|conserved	MSMEG_1393|MSMEG_1393|conserved	3	3	3	MSMEG_1393|MSMEG_1393|conserved hypothetical protein|136 AA	1	3	3	3	3	3	3	3	3	3	3	2	3	3	3	3	3	3	3	3	3	2	3	3	3	3	3	3	3	3	3	2	3	3	30.9	30.9	30.9	13.599	136	136	0	67.19	By MS/MS	By MS/MS
MSMEG_1397|MSMEG_1397|transcriptional	MSMEG_1397|MSMEG_1397|transcriptional	2	2	2	MSMEG_1397|MSMEG_1397|transcriptional regulator, TetR family protein|191 AA	1	2	2	2	1	2	1	1	2	2	1	2	2	2	1	2	1	1	2	2	1	2	2	2	1	2	1	1	2	2	1	2	2	2	11	11	11	21.216	191	191	0	5.8257	By matching	By matching
MSMEG_1398|rpsL|ribosomal	MSMEG_1398|rpsL|ribosomal	1	1	1	MSMEG_1398|rpsL|ribosomal protein S12|124 AA	1	1	1	1	1	1	1	1	1	1	1	1	1	1	1	1	1	1	1	1	1	1	1	1	1	1	1	1	1	1	1	1	1	1	6.5	6.5	6.5	13.863	124	124	0	5.2576	By MS/MS	By MS/MS
MSMEG_1399|rpsG|ribosomal	MSMEG_1399|rpsG|ribosomal	9	9	9	MSMEG_1399|rpsG|ribosomal protein S7|156 AA	1	9	9	9	8	9	8	8	8	8	9	9	8	9	8	9	8	8	8	8	9	9	8	9	8	9	8	8	8	8	9	9	8	9	61.5	61.5	61.5	17.628	156	156	0	113.26	By MS/MS	By MS/MS
MSMEG_1401|tuf|translation	MSMEG_1401|tuf|translation	26	26	26	MSMEG_1401|tuf|translation elongation factor Tu|396 AA	1	26	26	26	22	25	21	23	24	22	24	24	24	25	22	25	21	23	24	22	24	24	24	25	22	25	21	23	24	22	24	24	24	25	74.5	74.5	74.5	43.735	396	396	0	323.31	By MS/MS	By MS/MS
MSMEG_1402|MSMEG_1402|hypothetical	MSMEG_1402|MSMEG_1402|hypothetical	1	1	1	MSMEG_1402|MSMEG_1402|hypothetical protein|305 AA	1	1	1	1	1	0	1	0	0	0	0	0	0	0	1	0	1	0	0	0	0	0	0	0	1	0	1	0	0	0	0	0	0	0	6.2	6.2	6.2	30.535	305	305	0	3.4621	By matching
MSMEG_1403|MSMEG_1403|cutinase	MSMEG_1403|MSMEG_1403|cutinase	5	5	5	MSMEG_1403|MSMEG_1403|cutinase superfamily protein|305 AA	1	5	5	5	5	5	5	5	5	5	5	5	5	4	5	5	5	5	5	5	5	5	5	4	5	5	5	5	5	5	5	5	5	4	27.2	27.2	27.2	31.273	305	305	0	16.496	By MS/MS	By MS/MS
MSMEG_1410|MSMEG_1410|carveol	MSMEG_1410|MSMEG_1410|carveol	4	4	4	MSMEG_1410|MSMEG_1410|carveol dehydrogenase|283 AA	1	4	4	4	1	2	2	2	2	2	2	2	2	4	1	2	2	2	2	2	2	2	2	4	1	2	2	2	2	2	2	2	2	4	35.7	35.7	35.7	29.74	283	283	0	98.771	By MS/MS	By MS/MS
MSMEG_1415|MSMEG_1415|AsnC-family	MSMEG_1415|MSMEG_1415|AsnC-family	1	1	1	MSMEG_1415|MSMEG_1415|AsnC-family protein transcriptional regulator|148 AA	1	1	1	1	0	1	0	1	1	1	1	0	0	0	0	1	0	1	1	1	1	0	0	0	0	1	0	1	1	1	1	0	0	0	6.8	6.8	6.8	16.217	148	148	0.0096491	1.8563		By MS/MS
MSMEG_1416|MSMEG_1416|Pyridine	MSMEG_1416|MSMEG_1416|Pyridine	17	17	17	MSMEG_1416|MSMEG_1416|Pyridine nucleotide-disulphide oxidoreductase|395 AA	1	17	17	17	13	16	13	16	13	14	14	16	16	17	13	16	13	16	13	14	14	16	16	17	13	16	13	16	13	14	14	16	16	17	71.1	71.1	71.1	41.922	395	395	0	303.52	By MS/MS	By MS/MS
MSMEG_1417|MSMEG_1417|glyoxalase	MSMEG_1417|MSMEG_1417|glyoxalase	7	7	7	MSMEG_1417|MSMEG_1417|glyoxalase family protein|427 AA	1	7	7	7	4	5	7	7	7	6	7	7	7	7	4	5	7	7	7	6	7	7	7	7	4	5	7	7	7	6	7	7	7	7	23.9	23.9	23.9	45.124	427	427	0	41.996	By MS/MS	By MS/MS
MSMEG_1419|MSMEG_1419|conserved	MSMEG_1419|MSMEG_1419|conserved	5	5	5	MSMEG_1419|MSMEG_1419|conserved hypothetical protein|236 AA	1	5	5	5	2	1	1	4	1	2	2	4	4	2	2	1	1	4	1	2	2	4	4	2	2	1	1	4	1	2	2	4	4	2	39.4	39.4	39.4	25.69	236	236	0	14.564	By MS/MS	By matching
MSMEG_1422|MSMEG_1422|conserved	MSMEG_1422|MSMEG_1422|conserved	3	3	3	MSMEG_1422|MSMEG_1422|conserved hypothetical protein|102 AA	1	3	3	3	2	3	3	3	3	3	2	3	2	3	2	3	3	3	3	3	2	3	2	3	2	3	3	3	3	3	2	3	2	3	69.6	69.6	69.6	11.133	102	102	0	43.599	By MS/MS	By MS/MS
MSMEG_1423|MSMEG_1423|radical	MSMEG_1423|MSMEG_1423|radical	7	7	7	MSMEG_1423|MSMEG_1423|radical SAM domain protein|392 AA	1	7	7	7	5	4	6	6	4	6	5	7	7	5	5	4	6	6	4	6	5	7	7	5	5	4	6	6	4	6	5	7	7	5	27	27	27	42.378	392	392	0	35.941	By MS/MS	By MS/MS
MSMEG_1424|MSMEG_1424|FMN-dependent	MSMEG_1424|MSMEG_1424|FMN-dependent	10	10	10	MSMEG_1424|MSMEG_1424|FMN-dependent dehydrogenase|399 AA	1	10	10	10	7	9	10	7	8	9	9	10	8	10	7	9	10	7	8	9	9	10	8	10	7	9	10	7	8	9	9	10	8	10	43.4	43.4	43.4	42.774	399	399	0	78.501	By MS/MS	By MS/MS
MSMEG_1428|MSMEG_1428|glucose-methanol-choline	MSMEG_1428|MSMEG_1428|glucose-methanol-choline	4	4	4	MSMEG_1428|MSMEG_1428|glucose-methanol-choline oxidoreductase|468 AA	1	4	4	4	2	2	1	4	3	3	4	3	4	2	2	2	1	4	3	3	4	3	4	2	2	2	1	4	3	3	4	3	4	2	17.1	17.1	17.1	48.468	468	468	0	21.19	By MS/MS	By MS/MS
MSMEG_1429|MSMEG_1429|cytochrome	MSMEG_1429|MSMEG_1429|cytochrome	1	1	1	MSMEG_1429|MSMEG_1429|cytochrome P450-terp|416 AA	1	1	1	1	1	1	1	1	1	1	1	1	1	1	1	1	1	1	1	1	1	1	1	1	1	1	1	1	1	1	1	1	1	1	3.1	3.1	3.1	46.387	416	416	0.0009311	2.8043	By matching	By MS/MS
MSMEG_1430|MSMEG_1430|transcriptional	MSMEG_1430|MSMEG_1430|transcriptional	2	2	2	MSMEG_1430|MSMEG_1430|transcriptional regulator, TetR family protein|211 AA	1	2	2	2	1	2	1	2	2	2	2	1	2	2	1	2	1	2	2	2	2	1	2	2	1	2	1	2	2	2	2	1	2	2	13.7	13.7	13.7	22.267	211	211	0	5.274	By MS/MS	By MS/MS
MSMEG_1435|rpsJ|ribosomal	MSMEG_1435|rpsJ|ribosomal	7	7	7	MSMEG_1435|rpsJ|ribosomal protein S10|101 AA	1	7	7	7	7	7	7	7	7	7	7	7	7	7	7	7	7	7	7	7	7	7	7	7	7	7	7	7	7	7	7	7	7	7	63.4	63.4	63.4	11.433	101	101	0	36.685	By MS/MS	By MS/MS
MSMEG_1436|rplC|ribosomal	MSMEG_1436|rplC|ribosomal	11	11	11	MSMEG_1436|rplC|ribosomal protein L3|217 AA	1	11	11	11	6	8	9	7	7	7	8	9	7	7	6	8	9	7	7	7	8	9	7	7	6	8	9	7	7	7	8	9	7	7	56.2	56.2	56.2	22.972	217	217	0	144.53	By MS/MS	By MS/MS
MSMEG_1437|rplD|ribosomal	MSMEG_1437|rplD|ribosomal	8	8	8	MSMEG_1437|rplD|ribosomal protein L4/L1 family protein|215 AA	1	8	8	8	6	7	6	7	7	7	5	7	6	6	6	7	6	7	7	7	5	7	6	6	6	7	6	7	7	7	5	7	6	6	59.1	59.1	59.1	22.885	215	215	0	87.358	By MS/MS	By MS/MS
MSMEG_1438|rplW|ribosomal	MSMEG_1438|rplW|ribosomal	4	4	4	MSMEG_1438|rplW|ribosomal protein L23|100 AA	1	4	4	4	4	4	4	4	4	4	4	4	4	4	4	4	4	4	4	4	4	4	4	4	4	4	4	4	4	4	4	4	4	4	46	46	46	11.028	100	100	0	14.374	By MS/MS	By MS/MS
MSMEG_1439|rplB|ribosomal	MSMEG_1439|rplB|ribosomal	16	16	16	MSMEG_1439|rplB|ribosomal protein L2|278 AA	1	16	16	16	10	15	12	10	13	12	15	14	12	12	10	15	12	10	13	12	15	14	12	12	10	15	12	10	13	12	15	14	12	12	58.3	58.3	58.3	30.357	278	278	0	164.65	By MS/MS	By MS/MS
MSMEG_1440|rpsS|ribosomal	MSMEG_1440|rpsS|ribosomal	3	3	3	MSMEG_1440|rpsS|ribosomal protein S19|93 AA	1	3	3	3	2	3	2	2	2	3	3	3	2	3	2	3	2	2	2	3	3	3	2	3	2	3	2	2	2	3	3	3	2	3	38.7	38.7	38.7	10.773	93	93	0	7.902	By MS/MS	By MS/MS
MSMEG_1441|MSMEG_1441|50S	MSMEG_1441|MSMEG_1441|50S	4	4	4	MSMEG_1441|MSMEG_1441|50S ribosomal protein L22|153 AA	1	4	4	4	4	4	4	4	4	4	4	4	4	4	4	4	4	4	4	4	4	4	4	4	4	4	4	4	4	4	4	4	4	4	44.4	44.4	44.4	16.323	153	153	0	48.468	By MS/MS	By MS/MS
MSMEG_1442|rpsC|ribosomal	MSMEG_1442|rpsC|ribosomal	9	9	9	MSMEG_1442|rpsC|ribosomal protein S3|275 AA	1	9	9	9	8	8	8	8	8	7	9	8	8	8	8	8	8	8	8	7	9	8	8	8	8	8	8	8	8	7	9	8	8	8	39.6	39.6	39.6	30.139	275	275	0	251.55	By MS/MS	By MS/MS
MSMEG_1443|rplP|ribosomal	MSMEG_1443|rplP|ribosomal	3	3	3	MSMEG_1443|rplP|ribosomal protein L16|138 AA	1	3	3	3	3	3	3	3	3	2	2	3	3	3	3	3	3	3	3	2	2	3	3	3	3	3	3	3	3	2	2	3	3	3	23.9	23.9	23.9	15.742	138	138	0	37.724	By MS/MS	By MS/MS
MSMEG_1444|rpmC|ribosomal	MSMEG_1444|rpmC|ribosomal	10	10	10	MSMEG_1444|rpmC|ribosomal protein L29|77 AA	1	10	10	10	8	10	9	9	9	9	9	10	10	9	8	10	9	9	9	9	9	10	10	9	8	10	9	9	9	9	9	10	10	9	77.9	77.9	77.9	8.7778	77	77	0	151.33	By MS/MS	By MS/MS
MSMEG_1445|MSMEG_1445|30S	MSMEG_1445|MSMEG_1445|30S	7	7	7	MSMEG_1445|MSMEG_1445|30S ribosomal protein S17|98 AA	1	7	7	7	6	7	6	7	7	7	7	7	7	6	6	7	6	7	7	7	7	7	7	6	6	7	6	7	7	7	7	7	7	6	54.1	54.1	54.1	11.102	98	98	0	30.337	By MS/MS	By MS/MS
MSMEG_1451|MSMEG_1451|arylsulfatase|783	MSMEG_1451|MSMEG_1451|arylsulfatase|783	5	5	5	MSMEG_1451|MSMEG_1451|arylsulfatase|783 AA	1	5	5	5	2	2	2	5	3	3	2	4	3	3	2	2	2	5	3	3	2	4	3	3	2	2	2	5	3	3	2	4	3	3	13.3	13.3	13.3	86.13	783	783	0	16.091	By MS/MS	By matching
MSMEG_1465|rplN|ribosomal	MSMEG_1465|rplN|ribosomal	4	4	4	MSMEG_1465|rplN|ribosomal protein L14|122 AA	1	4	4	4	4	4	4	4	4	4	4	4	4	4	4	4	4	4	4	4	4	4	4	4	4	4	4	4	4	4	4	4	4	4	32	32	32	13.376	122	122	0	28.359	By MS/MS	By MS/MS
MSMEG_1466|rplX|ribosomal	MSMEG_1466|rplX|ribosomal	6	6	6	MSMEG_1466|rplX|ribosomal protein L24|105 AA	1	6	6	6	5	5	5	5	5	5	5	6	5	5	5	5	5	5	5	5	5	6	5	5	5	5	5	5	5	5	5	6	5	5	56.2	56.2	56.2	11.206	105	105	0	25.155	By MS/MS	By MS/MS
MSMEG_1467|MSMEG_1467|50S	MSMEG_1467|MSMEG_1467|50S	8	8	8	MSMEG_1467|MSMEG_1467|50S ribosomal protein L5|187 AA	1	8	8	8	8	8	8	8	8	8	8	7	8	8	8	8	8	8	8	8	8	7	8	8	8	8	8	8	8	8	8	7	8	8	49.7	49.7	49.7	21.122	187	187	0	165.76	By MS/MS	By MS/MS
MSMEG_1468|rpsZ|ribosomal	MSMEG_1468|rpsZ|ribosomal	1	1	1	MSMEG_1468|rpsZ|ribosomal protein S14p/S29e|61 AA	1	1	1	1	1	1	1	1	1	1	1	1	1	1	1	1	1	1	1	1	1	1	1	1	1	1	1	1	1	1	1	1	1	1	21.3	21.3	21.3	6.9583	61	61	0	8.6747	By MS/MS	By MS/MS
MSMEG_1469|rpsH|ribosomal	MSMEG_1469|rpsH|ribosomal	8	8	8	MSMEG_1469|rpsH|ribosomal protein S8|132 AA	1	8	8	8	4	7	8	8	7	7	6	7	8	7	4	7	8	8	7	7	6	7	8	7	4	7	8	8	7	7	6	7	8	7	63.6	63.6	63.6	14.47	132	132	0	23.055	By MS/MS	By MS/MS
MSMEG_1470|MSMEG_1470|50S	MSMEG_1470|MSMEG_1470|50S	10	10	10	MSMEG_1470|MSMEG_1470|50S ribosomal protein L6|179 AA	1	10	10	10	9	10	10	10	10	9	9	10	10	10	9	10	10	10	10	9	9	10	10	10	9	10	10	10	10	9	9	10	10	10	67	67	67	19.453	179	179	0	159.53	By MS/MS	By MS/MS
MSMEG_1471|rplR|ribosomal	MSMEG_1471|rplR|ribosomal	5	5	5	MSMEG_1471|rplR|ribosomal protein L18|127 AA	1	5	5	5	5	5	5	5	5	5	5	5	5	5	5	5	5	5	5	5	5	5	5	5	5	5	5	5	5	5	5	5	5	5	37	37	37	13.684	127	127	0	26.683	By MS/MS	By MS/MS
MSMEG_1472|rpsE|ribosomal	MSMEG_1472|rpsE|ribosomal	10	10	10	MSMEG_1472|rpsE|ribosomal protein S5|214 AA	1	10	10	10	10	9	10	10	10	9	9	10	10	10	10	9	10	10	10	9	9	10	10	10	10	9	10	10	10	9	9	10	10	10	48.1	48.1	48.1	21.911	214	214	0	45.723	By MS/MS	By MS/MS
MSMEG_1473|rpmD|ribosomal	MSMEG_1473|rpmD|ribosomal	1	1	1	MSMEG_1473|rpmD|ribosomal protein L30|61 AA	1	1	1	1	0	1	0	0	0	0	0	1	0	1	0	1	0	0	0	0	0	1	0	1	0	1	0	0	0	0	0	1	0	1	27.9	27.9	27.9	7.008	61	61	0	3.6827		By MS/MS
MSMEG_1474|rplO|ribosomal	MSMEG_1474|rplO|ribosomal	5	5	5	MSMEG_1474|rplO|ribosomal protein L15|147 AA	1	5	5	5	5	5	5	5	5	5	5	5	5	5	5	5	5	5	5	5	5	5	5	5	5	5	5	5	5	5	5	5	5	5	40.8	40.8	40.8	15.571	147	147	0	84.787	By MS/MS	By MS/MS
MSMEG_1475|MSMEG_1475|conserved	MSMEG_1475|MSMEG_1475|conserved	6	6	6	MSMEG_1475|MSMEG_1475|conserved hypothetical protein|326 AA	1	6	6	6	5	5	5	6	6	6	5	6	6	6	5	5	5	6	6	6	5	6	6	6	5	5	5	6	6	6	5	6	6	6	28.2	28.2	28.2	35.258	326	326	0	21.738	By MS/MS	By MS/MS
MSMEG_1476|sppA|signal	MSMEG_1476|sppA|signal	13	13	13	MSMEG_1476|sppA|signal peptide peptidase SppA, 67K type|594 AA	1	13	13	13	11	11	11	9	10	11	10	12	11	12	11	11	11	9	10	11	10	12	11	12	11	11	11	9	10	11	10	12	11	12	30	30	30	62.714	594	594	0	133.33	By MS/MS	By MS/MS
MSMEG_1479|MSMEG_1479|methyltransferase,;MSMEG_0614|MSMEG_0614|methyltransferase|297;MSMEG_1481|MSMEG_1481|methyltransferase|304	MSMEG_1479|MSMEG_1479|methyltransferase,	14;1;1	14;1;1	13;0;0	MSMEG_1479|MSMEG_1479|methyltransferase, putative, family protein|303 AA	3	14	14	13	10	12	12	12	13	13	12	14	13	14	10	12	12	12	13	13	12	14	13	14	9	11	11	11	12	12	11	13	12	13	73.6	73.6	71	32.948	303	303;297;304	0	115.95	By MS/MS	By MS/MS
MSMEG_1480|MSMEG_1480|methyltransferase|298	MSMEG_1480|MSMEG_1480|methyltransferase|298	7	6	6	MSMEG_1480|MSMEG_1480|methyltransferase|298 AA	1	7	6	6	4	6	6	6	5	5	4	7	7	7	3	5	5	5	4	4	3	6	6	6	3	5	5	5	4	4	3	6	6	6	38.3	35.6	35.6	32.377	298	298	0	44.334	By MS/MS	By MS/MS
MSMEG_1482|MSMEG_1482|methyltransferase|304	MSMEG_1482|MSMEG_1482|methyltransferase|304	9	9	9	MSMEG_1482|MSMEG_1482|methyltransferase|304 AA	1	9	9	9	7	8	8	8	7	7	8	8	9	8	7	8	8	8	7	7	8	8	9	8	7	8	8	8	7	7	8	8	9	8	41.8	41.8	41.8	33.122	304	304	0	156.63	By MS/MS	By MS/MS
MSMEG_1483|MSMEG_1483|preprotein	MSMEG_1483|MSMEG_1483|preprotein	1	1	1	MSMEG_1483|MSMEG_1483|preprotein translocase, SecY subunit|441 AA	1	1	1	1	1	0	0	0	0	0	0	0	0	1	1	0	0	0	0	0	0	0	0	1	1	0	0	0	0	0	0	0	0	1	2.7	2.7	2.7	47.581	441	441	0.0075122	1.9269	By matching
MSMEG_1484|MSMEG_1484|adenylate	MSMEG_1484|MSMEG_1484|adenylate	17	17	17	MSMEG_1484|MSMEG_1484|adenylate kinase|181 AA	1	17	17	17	14	17	16	17	17	17	15	17	17	17	14	17	16	17	17	17	15	17	17	17	14	17	16	17	17	17	15	17	17	17	83.4	83.4	83.4	19.871	181	181	0	211.31	By MS/MS	By MS/MS
MSMEG_1485|map|methionine	MSMEG_1485|map|methionine	7	7	7	MSMEG_1485|map|methionine aminopeptidase, type I|265 AA	1	7	7	7	4	7	6	7	5	6	7	5	5	5	4	7	6	7	5	6	7	5	5	5	4	7	6	7	5	6	7	5	5	5	40.4	40.4	40.4	27.581	265	265	0	42.828	By matching	By MS/MS
MSMEG_1496|mmsB|3-hydroxyisobutyrate	MSMEG_1496|mmsB|3-hydroxyisobutyrate	6	6	6	MSMEG_1496|mmsB|3-hydroxyisobutyrate dehydrogenase|290 AA	1	6	6	6	5	6	5	2	4	4	3	5	3	4	5	6	5	2	4	4	3	5	3	4	5	6	5	2	4	4	3	5	3	4	47.9	47.9	47.9	29.368	290	290	0	32.379	By MS/MS	By MS/MS
MSMEG_1498|mmsA|methylmalonate-semialdehyde	MSMEG_1498|mmsA|methylmalonate-semialdehyde	9	9	9	MSMEG_1498|mmsA|methylmalonate-semialdehyde dehydrogenase|506 AA	1	9	9	9	6	6	7	8	8	7	6	8	9	8	6	6	7	8	8	7	6	8	9	8	6	6	7	8	8	7	6	8	9	8	32.2	32.2	32.2	54.303	506	506	0	117.6	By MS/MS	By MS/MS
MSMEG_1510|MSMEG_1510|dTDP-4-dehydrorhamnose	MSMEG_1510|MSMEG_1510|dTDP-4-dehydrorhamnose	2	2	2	MSMEG_1510|MSMEG_1510|dTDP-4-dehydrorhamnose 3,5-epimerase|201 AA	1	2	2	2	1	1	2	2	2	1	1	2	2	2	1	1	2	2	2	1	1	2	2	2	1	1	2	2	2	1	1	2	2	2	22.4	22.4	22.4	22.241	201	201	0	17.545	By MS/MS	By matching
MSMEG_1511|MSMEG_1511|putative	MSMEG_1511|MSMEG_1511|putative	1	1	1	MSMEG_1511|MSMEG_1511|putative oxidoreductase|232 AA	1	1	1	1	0	1	1	1	1	1	0	1	1	1	0	1	1	1	1	1	0	1	1	1	0	1	1	1	1	1	0	1	1	1	8.6	8.6	8.6	26.002	232	232	0.0027347	2.4261		By matching
MSMEG_1512|rfbB|dTDP-glucose	MSMEG_1512|rfbB|dTDP-glucose	10	10	10	MSMEG_1512|rfbB|dTDP-glucose 4,6-dehydratase|331 AA	1	10	10	10	8	10	7	9	9	10	8	8	9	9	8	10	7	9	9	10	8	8	9	9	8	10	7	9	9	10	8	8	9	9	38.7	38.7	38.7	36.967	331	331	0	90.64	By MS/MS	By MS/MS
MSMEG_1513|MSMEG_1513|conserved	MSMEG_1513|MSMEG_1513|conserved	9	9	9	MSMEG_1513|MSMEG_1513|conserved hypothetical protein|283 AA	1	9	9	9	7	7	6	7	7	6	8	8	9	8	7	7	6	7	7	6	8	8	9	8	7	7	6	7	7	6	8	8	9	8	37.8	37.8	37.8	30.183	283	283	0	49.712	By MS/MS	By MS/MS
MSMEG_1514|MSMEG_1514|conserved	MSMEG_1514|MSMEG_1514|conserved	3	3	3	MSMEG_1514|MSMEG_1514|conserved hypothetical protein|298 AA	1	3	3	3	2	1	2	2	2	2	2	2	3	2	2	1	2	2	2	2	2	2	3	2	2	1	2	2	2	2	2	2	3	2	14.4	14.4	14.4	31.436	298	298	0	11.003	By MS/MS	By matching
MSMEG_1516|MSMEG_1516|thioredoxin	MSMEG_1516|MSMEG_1516|thioredoxin	4	4	4	MSMEG_1516|MSMEG_1516|thioredoxin reductase|552 AA	1	4	4	4	3	1	2	2	1	2	2	2	3	3	3	1	2	2	1	2	2	2	3	3	3	1	2	2	1	2	2	2	3	3	11.2	11.2	11.2	59.71	552	552	0	21.133	By MS/MS	By matching
MSMEG_1517|MSMEG_1517|spfh	MSMEG_1517|MSMEG_1517|spfh	14	14	14	MSMEG_1517|MSMEG_1517|spfh domain/band 7 family protein, putative|526 AA	1	14	14	14	9	12	10	9	10	9	8	9	8	9	9	12	10	9	10	9	8	9	8	9	9	12	10	9	10	9	8	9	8	9	39.7	39.7	39.7	54.604	526	526	0	166.02	By MS/MS	By MS/MS
MSMEG_1519|infA|translation	MSMEG_1519|infA|translation	3	3	3	MSMEG_1519|infA|translation initiation factor IF-1|73 AA	1	3	3	3	3	2	3	2	2	3	3	2	2	2	3	2	3	2	2	3	3	2	2	2	3	2	3	2	2	3	3	2	2	2	43.8	43.8	43.8	8.5029	73	73	0	9.1764	By MS/MS	By MS/MS
MSMEG_1520|rpmJ|ribosomal	MSMEG_1520|rpmJ|ribosomal	1	1	1	MSMEG_1520|rpmJ|ribosomal protein L36|37 AA	1	1	1	1	1	1	1	1	1	1	1	0	1	1	1	1	1	1	1	1	1	0	1	1	1	1	1	1	1	1	1	0	1	1	24.3	24.3	24.3	4.3292	37	37	0.0040504	2.2143	By MS/MS	By matching
MSMEG_1521|rpsM|ribosomal	MSMEG_1521|rpsM|ribosomal	10	10	10	MSMEG_1521|rpsM|ribosomal protein S13p/S18e|124 AA	1	10	10	10	8	10	10	9	9	9	9	8	9	9	8	10	10	9	9	9	9	8	9	9	8	10	10	9	9	9	9	8	9	9	61.3	61.3	61.3	14.217	124	124	0	95.958	By MS/MS	By MS/MS
MSMEG_1522|rpsK|ribosomal	MSMEG_1522|rpsK|ribosomal	3	3	3	MSMEG_1522|rpsK|ribosomal protein S11|138 AA	1	3	3	3	3	2	3	3	2	3	3	3	3	3	3	2	3	3	2	3	3	3	3	3	3	2	3	3	2	3	3	3	3	3	16.7	16.7	16.7	14.641	138	138	0	30.292	By MS/MS	By MS/MS
MSMEG_1523|rpsD|ribosomal	MSMEG_1523|rpsD|ribosomal	10	10	10	MSMEG_1523|rpsD|ribosomal protein S4|201 AA	1	10	10	10	7	9	8	9	8	9	7	9	9	10	7	9	8	9	8	9	7	9	9	10	7	9	8	9	8	9	7	9	9	10	51.2	51.2	51.2	23.375	201	201	0	69.717	By MS/MS	By MS/MS
MSMEG_1524|rpoA|DNA-directed	MSMEG_1524|rpoA|DNA-directed	22	22	22	MSMEG_1524|rpoA|DNA-directed RNA polymerase, alpha subunit|350 AA	1	22	22	22	16	20	19	21	21	20	18	21	21	22	16	20	19	21	21	20	18	21	21	22	16	20	19	21	21	20	18	21	21	22	84.6	84.6	84.6	37.919	350	350	0	323.31	By MS/MS	By MS/MS
MSMEG_1525|MSMEG_1525|50S	MSMEG_1525|MSMEG_1525|50S	5	5	5	MSMEG_1525|MSMEG_1525|50S ribosomal protein L17|199 AA	1	5	5	5	2	5	3	3	3	3	3	3	4	3	2	5	3	3	3	3	3	3	4	3	2	5	3	3	3	3	3	3	4	3	28.6	28.6	28.6	21.854	199	199	0	47.862	By MS/MS	By MS/MS
MSMEG_1526|MSMEG_1526|probable	MSMEG_1526|MSMEG_1526|probable	2	2	2	MSMEG_1526|MSMEG_1526|probable cutinase|230 AA	1	2	2	2	1	2	1	1	2	1	2	2	0	1	1	2	1	1	2	1	2	2	0	1	1	2	1	1	2	1	2	2	0	1	15.2	15.2	15.2	24.052	230	230	0	18.381	By matching	By MS/MS
MSMEG_1528|MSMEG_1528|cutinase|224	MSMEG_1528|MSMEG_1528|cutinase|224	4	4	4	MSMEG_1528|MSMEG_1528|cutinase|224 AA	1	4	4	4	4	4	4	4	4	4	4	4	4	4	4	4	4	4	4	4	4	4	4	4	4	4	4	4	4	4	4	4	4	4	28.6	28.6	28.6	22.43	224	224	0	52.214	By MS/MS	By MS/MS
MSMEG_1529|MSMEG_1529|serine	MSMEG_1529|MSMEG_1529|serine	6	6	6	MSMEG_1529|MSMEG_1529|serine esterase, cutinase family protein|211 AA	1	6	6	6	5	6	6	6	6	6	5	6	6	6	5	6	6	6	6	6	5	6	6	6	5	6	6	6	6	6	5	6	6	6	57.3	57.3	57.3	21.138	211	211	0	76.803	By MS/MS	By MS/MS
MSMEG_1543|MSMEG_1543|eptc-inducible;MSMEG_0900|MSMEG_0900|eptc-inducible	MSMEG_1543|MSMEG_1543|eptc-inducible;MSMEG_0900|MSMEG_0900|eptc-inducible	15;9	15;9	15;9	MSMEG_1543|MSMEG_1543|eptc-inducible aldehyde dehydrogenase|514 AA;MSMEG_0900|MSMEG_0900|eptc-inducible aldehyde dehydrogenase|507 AA	2	15	15	15	13	15	14	14	14	14	13	14	14	15	13	15	14	14	14	14	13	14	14	15	13	15	14	14	14	14	13	14	14	15	47.5	47.5	47.5	55.979	514	514;507	0	323.31	By MS/MS	By MS/MS
MSMEG_1544|MSMEG_1544|PduO	MSMEG_1544|MSMEG_1544|PduO	5	5	5	MSMEG_1544|MSMEG_1544|PduO protein|132 AA	1	5	5	5	5	5	5	4	5	5	5	5	3	5	5	5	5	4	5	5	5	5	3	5	5	5	5	4	5	5	5	5	3	5	53	53	53	13.344	132	132	0	171.68	By MS/MS	By MS/MS
MSMEG_1546|MSMEG_1546|coenzyme	MSMEG_1546|MSMEG_1546|coenzyme	11	11	11	MSMEG_1546|MSMEG_1546|coenzyme B12-dependent glycerol dehydrogenase small subunit|142 AA	1	11	11	11	10	10	9	9	10	10	9	11	9	9	10	10	9	9	10	10	9	11	9	9	10	10	9	9	10	10	9	11	9	9	88.7	88.7	88.7	15.428	142	142	0	99.645	By MS/MS	By MS/MS
MSMEG_1547|MSMEG_1547|glycerol	MSMEG_1547|MSMEG_1547|glycerol	26	26	26	MSMEG_1547|MSMEG_1547|glycerol dehydratase large subunit|570 AA	1	26	26	26	18	24	24	26	25	23	21	24	24	25	18	24	24	26	25	23	21	24	24	25	18	24	24	26	25	23	21	24	24	25	66.5	66.5	66.5	61.558	570	570	0	323.31	By MS/MS	By MS/MS
MSMEG_1548|MSMEG_1548|propanediol	MSMEG_1548|MSMEG_1548|propanediol	10	10	10	MSMEG_1548|MSMEG_1548|propanediol utilization: dehydratase, medium subunit|200 AA	1	10	10	10	8	10	9	9	9	9	10	10	9	9	8	10	9	9	9	9	10	10	9	9	8	10	9	9	9	9	10	10	9	9	57	57	57	21.571	200	200	0	51.97	By MS/MS	By MS/MS
MSMEG_1550|MSMEG_1550|PduH	MSMEG_1550|MSMEG_1550|PduH	2	2	2	MSMEG_1550|MSMEG_1550|PduH protein|113 AA	1	2	2	2	2	2	2	2	2	2	2	2	2	2	2	2	2	2	2	2	2	2	2	2	2	2	2	2	2	2	2	2	2	2	34.5	34.5	34.5	11.466	113	113	0	11.128	By MS/MS	By MS/MS
MSMEG_1554|eutC|ethanolamine	MSMEG_1554|eutC|ethanolamine	4	4	4	MSMEG_1554|eutC|ethanolamine ammonia-lyase, light chain|258 AA	1	4	4	4	3	4	4	3	3	4	3	3	2	3	3	4	4	3	3	4	3	3	2	3	3	4	4	3	3	4	3	3	2	3	22.1	22.1	22.1	27.129	258	258	0	21.986	By MS/MS	By MS/MS
MSMEG_1556|rplM|ribosomal	MSMEG_1556|rplM|ribosomal	5	5	5	MSMEG_1556|rplM|ribosomal protein L13|147 AA	1	5	5	5	3	5	4	5	4	5	5	5	5	5	3	5	4	5	4	5	5	5	5	5	3	5	4	5	4	5	5	5	5	5	44.9	44.9	44.9	16.118	147	147	0	85.294	By MS/MS	By MS/MS
MSMEG_1557|rpsI|ribosomal	MSMEG_1557|rpsI|ribosomal	10	10	10	MSMEG_1557|rpsI|ribosomal protein S9|150 AA	1	10	10	10	10	9	8	9	9	9	9	8	8	8	10	9	8	9	9	9	9	8	8	8	10	9	8	9	9	9	9	8	8	8	64.7	64.7	64.7	16.765	150	150	0	114.77	By MS/MS	By MS/MS
MSMEG_1559|glmM|phosphoglucosamine	MSMEG_1559|glmM|phosphoglucosamine	8	8	8	MSMEG_1559|glmM|phosphoglucosamine mutase|453 AA	1	8	8	8	5	7	6	7	5	4	4	7	6	6	5	7	6	7	5	4	4	7	6	6	5	7	6	7	5	4	4	7	6	6	29.1	29.1	29.1	46.554	453	453	0	53.278	By MS/MS	By MS/MS
MSMEG_1563|MSMEG_1563|short-chain	MSMEG_1563|MSMEG_1563|short-chain	2	2	2	MSMEG_1563|MSMEG_1563|short-chain dehydrogenase/reductase SDR|265 AA	1	2	2	2	1	1	0	1	1	2	1	0	0	1	1	1	0	1	1	2	1	0	0	1	1	1	0	1	1	2	1	0	0	1	9.4	9.4	9.4	26.991	265	265	0	9.6881	By MS/MS	By MS/MS
MSMEG_1565|MSMEG_1565|transcriptional	MSMEG_1565|MSMEG_1565|transcriptional	3	3	3	MSMEG_1565|MSMEG_1565|transcriptional regulator, TetR family protein|207 AA	1	3	3	3	2	2	2	2	2	2	1	3	2	2	2	2	2	2	2	2	1	3	2	2	2	2	2	2	2	2	1	3	2	2	18.4	18.4	18.4	22.089	207	207	0	13.032	By MS/MS	By matching
MSMEG_1566|MSMEG_1566|oxidoreductase|347	MSMEG_1566|MSMEG_1566|oxidoreductase|347	4	3	3	MSMEG_1566|MSMEG_1566|oxidoreductase|347 AA	1	4	3	3	2	1	2	3	2	2	2	2	2	3	1	1	1	2	1	1	1	1	1	2	1	1	1	2	1	1	1	1	1	2	15.3	13.3	13.3	37.551	347	347	0	4.5572	By matching	By matching
MSMEG_1567|MSMEG_1567|conserved	MSMEG_1567|MSMEG_1567|conserved	4	4	4	MSMEG_1567|MSMEG_1567|conserved hypothetical protein|283 AA	1	4	4	4	3	4	4	3	4	4	3	4	3	2	3	4	4	3	4	4	3	4	3	2	3	4	4	3	4	4	3	4	3	2	21.2	21.2	21.2	29.289	283	283	0	18.193	By MS/MS	By MS/MS
MSMEG_1573|MSMEG_1573|carbohydrate	MSMEG_1573|MSMEG_1573|carbohydrate	5	5	5	MSMEG_1573|MSMEG_1573|carbohydrate kinase family protein|470 AA	1	5	5	5	1	1	1	5	4	4	4	4	4	4	1	1	1	5	4	4	4	4	4	4	1	1	1	5	4	4	4	4	4	4	19.8	19.8	19.8	47.069	470	470	0	14.322	By matching	By MS/MS
MSMEG_1574|MSMEG_1574|glutamate	MSMEG_1574|MSMEG_1574|glutamate	19	19	19	MSMEG_1574|MSMEG_1574|glutamate decarboxylase|459 AA	1	19	19	19	14	17	16	18	17	14	18	17	18	17	14	17	16	18	17	14	18	17	18	17	14	17	16	18	17	14	18	17	18	17	56.9	56.9	56.9	50.767	459	459	0	323.31	By MS/MS	By MS/MS
MSMEG_1575|alr|alanine	MSMEG_1575|alr|alanine	6	6	6	MSMEG_1575|alr|alanine racemase|389 AA	1	6	6	6	3	4	4	5	4	4	5	6	6	4	3	4	4	5	4	4	5	6	6	4	3	4	4	5	4	4	5	6	6	4	28.8	28.8	28.8	41.055	389	389	0	24.444	By MS/MS	By MS/MS
MSMEG_1577|MSMEG_1577|conserved	MSMEG_1577|MSMEG_1577|conserved	2	2	2	MSMEG_1577|MSMEG_1577|conserved hypothetical protein|155 AA	1	2	2	2	2	2	2	2	2	2	2	2	2	2	2	2	2	2	2	2	2	2	2	2	2	2	2	2	2	2	2	2	2	2	23.2	23.2	23.2	16.667	155	155	0	12.226	By MS/MS	By matching
MSMEG_1578|MSMEG_1578|peptidase	MSMEG_1578|MSMEG_1578|peptidase	3	3	3	MSMEG_1578|MSMEG_1578|peptidase M22, glycoprotease|214 AA	1	3	3	3	3	3	3	3	3	3	3	3	3	3	3	3	3	3	3	3	3	3	3	3	3	3	3	3	3	3	3	3	3	3	19.2	19.2	19.2	21.772	214	214	0	34.837	By MS/MS	By MS/MS
MSMEG_1580|MSMEG_1580|O-sialoglycoprotein	MSMEG_1580|MSMEG_1580|O-sialoglycoprotein	6	6	6	MSMEG_1580|MSMEG_1580|O-sialoglycoprotein endopeptidase|340 AA	1	6	6	6	4	5	6	6	5	5	5	6	6	6	4	5	6	6	5	5	5	6	6	6	4	5	6	6	5	5	5	6	6	6	23.8	23.8	23.8	34.718	340	340	0	36.676	By MS/MS	By MS/MS
MSMEG_1582|groS|chaperonin	MSMEG_1582|groS|chaperonin	11	11	11	MSMEG_1582|groS|chaperonin GroS|100 AA	1	11	11	11	8	10	11	10	10	11	10	10	11	10	8	10	11	10	10	11	10	10	11	10	8	10	11	10	10	11	10	10	11	10	99	99	99	10.763	100	100	0	198.95	By MS/MS	By MS/MS
MSMEG_1583|groL2|chaperonin	MSMEG_1583|groL2|chaperonin	27	26	26	MSMEG_1583|groL2|chaperonin GroL|540 AA	1	27	26	26	24	25	25	26	24	26	25	25	24	25	23	24	24	25	23	25	24	24	23	24	23	24	24	25	23	25	24	24	23	24	58.1	56.5	56.5	56.152	540	540	0	323.31	By MS/MS	By MS/MS
MSMEG_1598|MSMEG_1598|conserved	MSMEG_1598|MSMEG_1598|conserved	3	3	3	MSMEG_1598|MSMEG_1598|conserved hypothetical protein|268 AA	1	3	3	3	2	2	1	3	2	3	3	3	3	3	2	2	1	3	2	3	3	3	3	3	2	2	1	3	2	3	3	3	3	3	19	19	19	28.084	268	268	0	12.724	By matching	By MS/MS
MSMEG_1599|MSMEG_1599|RNA	MSMEG_1599|MSMEG_1599|RNA	1	1	1	MSMEG_1599|MSMEG_1599|RNA polymerase sigma-70 factor|192 AA	1	1	1	1	1	1	0	0	0	1	0	1	0	1	1	1	0	0	0	1	0	1	0	1	1	1	0	0	0	1	0	1	0	1	9.9	9.9	9.9	20.625	192	192	0	33.425	By MS/MS	By matching
MSMEG_1600|MSMEG_1600|conserved	MSMEG_1600|MSMEG_1600|conserved	5	5	5	MSMEG_1600|MSMEG_1600|conserved hypothetical protein|399 AA	1	5	5	5	3	4	3	4	3	3	4	4	4	4	3	4	3	4	3	3	4	4	4	4	3	4	3	4	3	3	4	4	4	4	21.8	21.8	21.8	41.054	399	399	0	143.52	By MS/MS	By MS/MS
MSMEG_1602|guaB|inosine-5'-monophosphate	MSMEG_1602|guaB|inosine-5'-monophosphate	17	17	17	MSMEG_1602|guaB|inosine-5-monophosphate dehydrogenase|513 AA	1	17	17	17	15	16	17	16	15	15	15	17	17	16	15	16	17	16	15	15	15	17	17	16	15	16	17	16	15	15	15	17	17	16	46	46	46	53.332	513	513	0	130.67	By MS/MS	By MS/MS
MSMEG_1603|MSMEG_1603|IMP	MSMEG_1603|MSMEG_1603|IMP	17	17	17	MSMEG_1603|MSMEG_1603|IMP dehydrogenase family protein|375 AA	1	17	17	17	12	15	13	17	16	15	14	16	16	17	12	15	13	17	16	15	14	16	16	17	12	15	13	17	16	15	14	16	16	17	75.7	75.7	75.7	39.006	375	375	0	126.96	By MS/MS	By MS/MS
MSMEG_1604|MSMEG_1604|FAD	MSMEG_1604|MSMEG_1604|FAD	2	2	2	MSMEG_1604|MSMEG_1604|FAD dependent oxidoreductase|578 AA	1	2	2	2	2	2	2	2	2	2	2	2	2	2	2	2	2	2	2	2	2	2	2	2	2	2	2	2	2	2	2	2	2	2	6.1	6.1	6.1	62.879	578	578	0.0096449	1.8558	By matching	By matching
MSMEG_1608|MSMEG_1608|glycosyl	MSMEG_1608|MSMEG_1608|glycosyl	2	2	2	MSMEG_1608|MSMEG_1608|glycosyl transferase|787 AA	1	2	2	2	0	0	0	1	1	1	1	1	2	1	0	0	0	1	1	1	1	1	2	1	0	0	0	1	1	1	1	1	2	1	3.6	3.6	3.6	87.265	787	787	0	4.9074
MSMEG_1610|MSMEG_1610|glutamine-hydrolyzing	MSMEG_1610|MSMEG_1610|glutamine-hydrolyzing	16	16	16	MSMEG_1610|MSMEG_1610|glutamine-hydrolyzing GMP synthase|520 AA	1	16	16	16	11	12	13	16	13	13	14	16	16	16	11	12	13	16	13	13	14	16	16	16	11	12	13	16	13	13	14	16	16	16	44.8	44.8	44.8	55.814	520	520	0	131.79	By MS/MS	By MS/MS
MSMEG_1618|MSMEG_1618|hypothetical	MSMEG_1618|MSMEG_1618|hypothetical	2	2	2	MSMEG_1618|MSMEG_1618|hypothetical protein|96 AA	1	2	2	2	2	2	2	2	2	2	2	2	2	1	2	2	2	2	2	2	2	2	2	1	2	2	2	2	2	2	2	2	2	1	28.1	28.1	28.1	9.7208	96	96	0	5.5252	By MS/MS	By matching
MSMEG_1621|MSMEG_1621|pyrimidine-specific	MSMEG_1621|MSMEG_1621|pyrimidine-specific	5	5	5	MSMEG_1621|MSMEG_1621|pyrimidine-specific ribonucleoside hydrolase RihA|350 AA	1	5	5	5	3	3	1	4	4	2	4	5	5	4	3	3	1	4	4	2	4	5	5	4	3	3	1	4	4	2	4	5	5	4	23.4	23.4	23.4	37.201	350	350	0	9.733	By MS/MS	By MS/MS
MSMEG_1629|MSMEG_1629|hypothetical	MSMEG_1629|MSMEG_1629|hypothetical	2	2	2	MSMEG_1629|MSMEG_1629|hypothetical protein|389 AA	1	2	2	2	2	2	2	2	1	2	2	2	2	1	2	2	2	2	1	2	2	2	2	1	2	2	2	2	1	2	2	2	2	1	8.5	8.5	8.5	39.782	389	389	0	7.6171	By MS/MS	By MS/MS
MSMEG_1634|MSMEG_1634|probable	MSMEG_1634|MSMEG_1634|probable	11	11	11	MSMEG_1634|MSMEG_1634|probable forkhead-associated protein|199 AA	1	11	11	11	10	10	9	10	10	9	9	10	11	11	10	10	9	10	10	9	9	10	11	11	10	10	9	10	10	9	9	10	11	11	91	91	91	20.447	199	199	0	96.554	By MS/MS	By MS/MS
MSMEG_1635|MSMEG_1635|nitroreductase	MSMEG_1635|MSMEG_1635|nitroreductase	11	11	11	MSMEG_1635|MSMEG_1635|nitroreductase family protein|213 AA	1	11	11	11	5	11	8	8	11	9	10	10	10	10	5	11	8	8	11	9	10	10	10	10	5	11	8	8	11	9	10	10	10	10	58.2	58.2	58.2	23.77	213	213	0	73.125	By MS/MS	By MS/MS
MSMEG_1637|MSMEG_1637|periplasmic	MSMEG_1637|MSMEG_1637|periplasmic	5	5	5	MSMEG_1637|MSMEG_1637|periplasmic sensor signal transduction histidine kinase|927 AA	1	5	5	5	5	5	4	5	4	5	4	4	4	5	5	5	4	5	4	5	4	4	4	5	5	5	4	5	4	5	4	4	4	5	8.3	8.3	8.3	97.236	927	927	0	22.405	By MS/MS	By MS/MS
MSMEG_1638|MSMEG_1638|Roadblock/LC7	MSMEG_1638|MSMEG_1638|Roadblock/LC7	2	2	2	MSMEG_1638|MSMEG_1638|Roadblock/LC7 domain protein|135 AA	1	2	2	2	1	1	1	1	1	1	1	1	1	2	1	1	1	1	1	1	1	1	1	2	1	1	1	1	1	1	1	1	1	2	16.3	16.3	16.3	14.168	135	135	0	18.229	By MS/MS	By MS/MS
MSMEG_1639|MSMEG_1639|conserved	MSMEG_1639|MSMEG_1639|conserved	2	2	2	MSMEG_1639|MSMEG_1639|conserved hypothetical protein|121 AA	1	2	2	2	2	2	2	2	2	2	2	2	2	2	2	2	2	2	2	2	2	2	2	2	2	2	2	2	2	2	2	2	2	2	35.5	35.5	35.5	13.205	121	121	0	8.0367	By MS/MS	By MS/MS
MSMEG_1642|MSMEG_1642|ABC	MSMEG_1642|MSMEG_1642|ABC	7	7	7	MSMEG_1642|MSMEG_1642|ABC transporter, ATP-binding protein|899 AA	1	7	7	7	6	6	6	5	5	5	5	6	4	7	6	6	6	5	5	5	5	6	4	7	6	6	6	5	5	5	5	6	4	7	13.5	13.5	13.5	95.528	899	899	0	22.889	By matching	By MS/MS
MSMEG_1647|MSMEG_1647|tetrahydrofolate	MSMEG_1647|MSMEG_1647|tetrahydrofolate	17	17	17	MSMEG_1647|MSMEG_1647|tetrahydrofolate dehydrogenase/cyclohydrolase FolD|283 AA	1	17	17	17	13	16	14	14	15	12	16	16	14	16	13	16	14	14	15	12	16	16	14	16	13	16	14	14	15	12	16	16	14	16	70.7	70.7	70.7	29.693	283	283	0	191.28	By MS/MS	By MS/MS
MSMEG_1650|MSMEG_1650|methyltransferase	MSMEG_1650|MSMEG_1650|methyltransferase	1	1	1	MSMEG_1650|MSMEG_1650|methyltransferase type 11|245 AA	1	1	1	1	1	1	1	1	1	1	1	1	1	1	1	1	1	1	1	1	1	1	1	1	1	1	1	1	1	1	1	1	1	1	5.3	5.3	5.3	26.862	245	245	0	5.206	By MS/MS	By MS/MS
MSMEG_1651|metX|homoserine	MSMEG_1651|metX|homoserine	11	11	11	MSMEG_1651|metX|homoserine O-acetyltransferase|380 AA	1	11	11	11	8	8	8	11	10	9	10	9	8	9	8	8	8	11	10	9	10	9	8	9	8	8	8	11	10	9	10	9	8	9	34.2	34.2	34.2	39.953	380	380	0	216.42	By MS/MS	By MS/MS
MSMEG_1652|MSMEG_1652|O-acetylhomoserine	MSMEG_1652|MSMEG_1652|O-acetylhomoserine	15	15	15	MSMEG_1652|MSMEG_1652|O-acetylhomoserine sulfhydrylase|443 AA	1	15	15	15	7	13	12	14	13	10	10	13	14	13	7	13	12	14	13	10	10	13	14	13	7	13	12	14	13	10	10	13	14	13	68.4	68.4	68.4	46.823	443	443	0	203.24	By MS/MS	By MS/MS
MSMEG_1654|MSMEG_1654|isocitrate	MSMEG_1654|MSMEG_1654|isocitrate	33	33	33	MSMEG_1654|MSMEG_1654|isocitrate dehydrogenase, NADP-dependent|743 AA	1	33	33	33	25	32	30	30	30	28	27	30	30	31	25	32	30	30	30	28	27	30	30	31	25	32	30	30	30	28	27	30	30	31	63.4	63.4	63.4	82.603	743	743	0	323.31	By MS/MS	By MS/MS
MSMEG_1655|MSMEG_1655|hydrolase,	MSMEG_1655|MSMEG_1655|hydrolase,	3	3	3	MSMEG_1655|MSMEG_1655|hydrolase, alpha/beta fold family protein, putative|279 AA	1	3	3	3	1	1	1	1	1	1	2	2	1	3	1	1	1	1	1	1	2	2	1	3	1	1	1	1	1	1	2	2	1	3	20.1	20.1	20.1	30.897	279	279	0	6.1302	By MS/MS	By matching
MSMEG_1656|xth|exodeoxyribonuclease	MSMEG_1656|xth|exodeoxyribonuclease	3	3	3	MSMEG_1656|xth|exodeoxyribonuclease III|273 AA	1	3	3	3	3	3	2	2	2	2	2	2	3	3	3	3	2	2	2	2	2	2	3	3	3	3	2	2	2	2	2	2	3	3	15.4	15.4	15.4	30.137	273	273	0	10.929	By MS/MS	By MS/MS
MSMEG_1657|trpS|tryptophanyl-tRNA	MSMEG_1657|trpS|tryptophanyl-tRNA	10	10	10	MSMEG_1657|trpS|tryptophanyl-tRNA synthetase|338 AA	1	10	10	10	9	10	9	9	10	9	9	10	9	9	9	10	9	9	10	9	9	10	9	9	9	10	9	9	10	9	9	10	9	9	37	37	37	36.809	338	338	0	75.492	By MS/MS	By MS/MS
MSMEG_1661|MSMEG_1661|D-alanyl-D-alanine	MSMEG_1661|MSMEG_1661|D-alanyl-D-alanine	4	4	4	MSMEG_1661|MSMEG_1661|D-alanyl-D-alanine carboxypeptidase|397 AA	1	4	4	4	2	3	3	4	3	3	4	3	4	3	2	3	3	4	3	3	4	3	4	3	2	3	3	4	3	3	4	3	4	3	17.1	17.1	17.1	41.083	397	397	0	81.653	By MS/MS	By MS/MS
MSMEG_1662|MSMEG_1662|taurine-pyruvate	MSMEG_1662|MSMEG_1662|taurine-pyruvate	16	16	16	MSMEG_1662|MSMEG_1662|taurine-pyruvate aminotransferase|461 AA	1	16	16	16	14	15	13	15	16	15	15	16	15	16	14	15	13	15	16	15	15	16	15	16	14	15	13	15	16	15	15	16	15	16	53.8	53.8	53.8	50.067	461	461	0	229.96	By MS/MS	By MS/MS
MSMEG_1665|MSMEG_1665|aldehyde	MSMEG_1665|MSMEG_1665|aldehyde	15	15	15	MSMEG_1665|MSMEG_1665|aldehyde dehydrogenase (NAD) family protein|493 AA	1	15	15	15	10	14	13	14	13	12	12	13	15	14	10	14	13	14	13	12	12	13	15	14	10	14	13	14	13	12	12	13	15	14	58.8	58.8	58.8	51.916	493	493	0	169.86	By MS/MS	By MS/MS
MSMEG_1669|sdhB|succinate	MSMEG_1669|sdhB|succinate	14	14	14	MSMEG_1669|sdhB|succinate dehydrogenase, iron-sulfur protein|261 AA	1	14	14	14	11	14	12	12	13	12	12	13	13	13	11	14	12	12	13	12	12	13	13	13	11	14	12	12	13	12	12	13	13	13	70.1	70.1	70.1	29.21	261	261	0	143.28	By MS/MS	By MS/MS
MSMEG_1670|sdhA|succinate	MSMEG_1670|sdhA|succinate	21	21	21	MSMEG_1670|sdhA|succinate dehydrogenase, flavoprotein subunit|584 AA	1	21	21	21	19	21	20	20	20	19	21	21	20	21	19	21	20	20	20	19	21	21	20	21	19	21	20	20	20	19	21	21	20	21	46.6	46.6	46.6	64.393	584	584	0	237.22	By MS/MS	By MS/MS
MSMEG_1672|sdhC|succinate	MSMEG_1672|sdhC|succinate	2	2	2	MSMEG_1672|sdhC|succinate dehydrogenase, cytochrome b556 subunit|138 AA	1	2	2	2	1	2	2	2	2	2	2	2	2	2	1	2	2	2	2	2	2	2	2	2	1	2	2	2	2	2	2	2	2	2	18.8	18.8	18.8	15.626	138	138	0	12.908	By matching	By MS/MS
MSMEG_1673|cdd|cytidine	MSMEG_1673|cdd|cytidine	1	1	1	MSMEG_1673|cdd|cytidine deaminase|128 AA	1	1	1	1	1	1	1	1	1	1	1	1	1	1	1	1	1	1	1	1	1	1	1	1	1	1	1	1	1	1	1	1	1	1	14.8	14.8	14.8	13.346	128	128	0	25.691	By MS/MS	By MS/MS
MSMEG_1675|MSMEG_1675|pyrimidine-nucleoside	MSMEG_1675|MSMEG_1675|pyrimidine-nucleoside	9	9	9	MSMEG_1675|MSMEG_1675|pyrimidine-nucleoside phosphorylase|413 AA	1	9	9	9	9	7	8	9	6	8	8	8	9	9	9	7	8	9	6	8	8	8	9	9	9	7	8	9	6	8	8	8	9	9	33.9	33.9	33.9	42.986	413	413	0	27.787	By MS/MS	By MS/MS
MSMEG_1676|add|adenosine	MSMEG_1676|add|adenosine	8	8	8	MSMEG_1676|add|adenosine deaminase|366 AA	1	8	8	8	6	7	7	8	7	8	8	8	8	7	6	7	7	8	7	8	8	8	8	7	6	7	7	8	7	8	8	8	8	7	26.5	26.5	26.5	39.973	366	366	0	60.747	By MS/MS	By MS/MS
MSMEG_1679|MSMEG_1679|AmiB|385	MSMEG_1679|MSMEG_1679|AmiB|385	8	8	8	MSMEG_1679|MSMEG_1679|AmiB|385 AA	1	8	8	8	6	7	5	7	7	5	7	7	7	7	6	7	5	7	7	5	7	7	7	7	6	7	5	7	7	5	7	7	7	7	28.8	28.8	28.8	40.728	385	385	0	98.114	By MS/MS	By MS/MS
MSMEG_1680|MSMEG_1680|conserved	MSMEG_1680|MSMEG_1680|conserved	7	7	7	MSMEG_1680|MSMEG_1680|conserved hypothetical protein|224 AA	1	7	7	7	5	7	7	7	7	7	5	7	7	7	5	7	7	7	7	7	5	7	7	7	5	7	7	7	7	7	5	7	7	7	48.7	48.7	48.7	23.544	224	224	0	68.645	By MS/MS	By MS/MS
MSMEG_1681|MSMEG_1681|endoribonuclease	MSMEG_1681|MSMEG_1681|endoribonuclease	5	5	5	MSMEG_1681|MSMEG_1681|endoribonuclease L-PSP superfamily protein|147 AA	1	5	5	5	5	5	5	5	5	5	5	5	5	5	5	5	5	5	5	5	5	5	5	5	5	5	5	5	5	5	5	5	5	5	51	51	51	16.217	147	147	0	83.126	By MS/MS	By MS/MS
MSMEG_1682|MSMEG_1682|flavin-containing	MSMEG_1682|MSMEG_1682|flavin-containing	9	9	9	MSMEG_1682|MSMEG_1682|flavin-containing monooxygenase FMO|421 AA	1	9	9	9	5	8	8	9	9	8	7	9	9	9	5	8	8	9	9	8	7	9	9	9	5	8	8	9	9	8	7	9	9	9	31.8	31.8	31.8	46.213	421	421	0	59.873	By MS/MS	By MS/MS
MSMEG_1683|MSMEG_1683|cytosine/purine/uracil/thiamine/allantoin	MSMEG_1683|MSMEG_1683|cytosine/purine/uracil/thiamine/allantoin	2	2	2	MSMEG_1683|MSMEG_1683|cytosine/purine/uracil/thiamine/allantoin permease family protein|483 AA	1	2	2	2	0	0	0	0	0	0	0	0	0	2	0	0	0	0	0	0	0	0	0	2	0	0	0	0	0	0	0	0	0	2	5.6	5.6	5.6	51.015	483	483	0	5.4741
MSMEG_1684|MSMEG_1684|conserved	MSMEG_1684|MSMEG_1684|conserved	19	19	19	MSMEG_1684|MSMEG_1684|conserved hypothetical protein|431 AA	1	19	19	19	12	19	17	19	17	14	14	18	19	19	12	19	17	19	17	14	14	18	19	19	12	19	17	19	17	14	14	18	19	19	66.6	66.6	66.6	47.199	431	431	0	182.11	By MS/MS	By MS/MS
MSMEG_1694|upp|uracil	MSMEG_1694|upp|uracil	9	9	9	MSMEG_1694|upp|uracil phosphoribosyltransferase|207 AA	1	9	9	9	4	8	9	8	9	7	6	9	9	8	4	8	9	8	9	7	6	9	9	8	4	8	9	8	9	7	6	9	9	8	81.6	81.6	81.6	21.949	207	207	0	49.441	By MS/MS	By MS/MS
MSMEG_1695|MSMEG_1695|phosphoglucomutase/phosphomannomutase|538	MSMEG_1695|MSMEG_1695|phosphoglucomutase/phosphomannomutase|538	9	9	9	MSMEG_1695|MSMEG_1695|phosphoglucomutase/phosphomannomutase|538 AA	1	9	9	9	4	8	6	8	7	8	7	9	9	8	4	8	6	8	7	8	7	9	9	8	4	8	6	8	7	8	7	9	9	8	27.9	27.9	27.9	57.309	538	538	0	31.368	By MS/MS	By MS/MS
MSMEG_1701|MSMEG_1701|purine	MSMEG_1701|MSMEG_1701|purine	7	7	7	MSMEG_1701|MSMEG_1701|purine nucleotide phosphorylase|264 AA	1	7	7	7	5	5	6	7	5	6	5	6	7	6	5	5	6	7	5	6	5	6	7	6	5	5	6	7	5	6	5	6	7	6	37.5	37.5	37.5	27.239	264	264	0	63.251	By MS/MS	By MS/MS
MSMEG_1702|MSMEG_1702|amidohydrolase|394	MSMEG_1702|MSMEG_1702|amidohydrolase|394	1	1	1	MSMEG_1702|MSMEG_1702|amidohydrolase|394 AA	1	1	1	1	0	1	1	1	1	1	0	1	1	1	0	1	1	1	1	1	0	1	1	1	0	1	1	1	1	1	0	1	1	1	2.8	2.8	2.8	40.395	394	394	0.0013863	2.711		By MS/MS
MSMEG_1703|MSMEG_1703|amidohydrolase|390	MSMEG_1703|MSMEG_1703|amidohydrolase|390	7	7	7	MSMEG_1703|MSMEG_1703|amidohydrolase|390 AA	1	7	7	7	5	6	6	7	6	6	6	6	7	6	5	6	6	7	6	6	6	6	7	6	5	6	6	7	6	6	6	6	7	6	28.5	28.5	28.5	41.25	390	390	0	20.84	By MS/MS	By MS/MS
MSMEG_1704|MSMEG_1704|ABC	MSMEG_1704|MSMEG_1704|ABC	2	2	2	MSMEG_1704|MSMEG_1704|ABC transporter|365 AA	1	2	2	2	1	1	0	1	0	1	0	2	1	0	1	1	0	1	0	1	0	2	1	0	1	1	0	1	0	1	0	2	1	0	6	6	6	38.767	365	365	0.00093327	2.841	By matching	By matching
MSMEG_1712|MSMEG_1712|ABC	MSMEG_1712|MSMEG_1712|ABC	4	4	4	MSMEG_1712|MSMEG_1712|ABC transporter periplasmic-binding protein YtfQ|328 AA	1	4	4	4	0	2	1	1	1	4	0	1	2	3	0	2	1	1	1	4	0	1	2	3	0	2	1	1	1	4	0	1	2	3	13.7	13.7	13.7	34.234	328	328	0	5.5774		By MS/MS
MSMEG_2675|MSMEG_2675|ISMsm8,;MSMEG_1717|MSMEG_1717|ISMsm8,	MSMEG_2675|MSMEG_2675|ISMsm8,;MSMEG_1717|MSMEG_1717|ISMsm8,	1;1	1;1	1;1	MSMEG_2675|MSMEG_2675|ISMsm8, transposase|466 AA;MSMEG_1717|MSMEG_1717|ISMsm8, transposase|466 AA	2	1	1	1	0	0	0	0	0	0	1	0	1	0	0	0	0	0	0	0	1	0	1	0	0	0	0	0	0	0	1	0	1	0	3.4	3.4	3.4	52.056	466	466;466	0.0066875	2.0298
MSMEG_4132|MSMEG_4132|putative;MSMEG_1863|MSMEG_1863|putative;MSMEG_1725|MSMEG_1725|putative	MSMEG_4132|MSMEG_4132|putative;MSMEG_1863|MSMEG_1863|putative;MSMEG_1725|MSMEG_1725|putative	1;1;1	1;1;1	1;1;1	MSMEG_4132|MSMEG_4132|putative transposase|129 AA;MSMEG_1863|MSMEG_1863|putative transposase|129 AA;MSMEG_1725|MSMEG_1725|putative transposase|129 AA	3	1	1	1	1	1	1	1	1	0	0	1	1	0	1	1	1	1	1	0	0	1	1	0	1	1	1	1	1	0	0	1	1	0	10.1	10.1	10.1	13.998	129	129;129;129	0	3.7189	By matching	By MS/MS
MSMEG_1734|MSMEG_1734|conserved	MSMEG_1734|MSMEG_1734|conserved	5	5	5	MSMEG_1734|MSMEG_1734|conserved hypothetical protein|155 AA	1	5	5	5	2	3	4	4	4	3	3	5	5	5	2	3	4	4	4	3	3	5	5	5	2	3	4	4	4	3	3	5	5	5	66.5	66.5	66.5	17.192	155	155	0	34.597	By MS/MS	By MS/MS
MSMEG_1735|MSMEG_1735|dihydrolipoamide	MSMEG_1735|MSMEG_1735|dihydrolipoamide	16	16	16	MSMEG_1735|MSMEG_1735|dihydrolipoamide dehydrogenase|471 AA	1	16	16	16	13	14	14	14	14	15	14	14	15	14	13	14	14	14	14	15	14	14	15	14	13	14	14	14	14	15	14	14	15	14	56.3	56.3	56.3	49.067	471	471	0	69.367	By MS/MS	By MS/MS
MSMEG_1736|MSMEG_1736|glycerol-3-phosphate	MSMEG_1736|MSMEG_1736|glycerol-3-phosphate	3	3	3	MSMEG_1736|MSMEG_1736|glycerol-3-phosphate dehydrogenase 2|581 AA	1	3	3	3	2	2	2	2	2	2	2	2	3	3	2	2	2	2	2	2	2	2	3	3	2	2	2	2	2	2	2	2	3	3	7.1	7.1	7.1	63.052	581	581	0	12.827	By MS/MS	By MS/MS
MSMEG_1739|MSMEG_1739|enoyl-CoA;MSMEG_5620|MSMEG_5620|enoyl-CoA	MSMEG_1739|MSMEG_1739|enoyl-CoA	3;1	3;1	3;1	MSMEG_1739|MSMEG_1739|enoyl-CoA hydratase/isomerase family protein|262 AA	2	3	3	3	1	1	1	1	2	2	3	1	1	1	1	1	1	1	2	2	3	1	1	1	1	1	1	1	2	2	3	1	1	1	16	16	16	27.788	262	262;259	0.0067024	2.0428	By matching	By matching
MSMEG_1743|MSMEG_1743|Fatty	MSMEG_1743|MSMEG_1743|Fatty	1	1	1	MSMEG_1743|MSMEG_1743|Fatty acid desaturase|382 AA	1	1	1	1	1	0	1	0	1	0	0	1	0	0	1	0	1	0	1	0	0	1	0	0	1	0	1	0	1	0	0	1	0	0	4.5	4.5	4.5	43.379	382	382	0	3.4395	By matching
MSMEG_1745|MSMEG_1745|transcriptional	MSMEG_1745|MSMEG_1745|transcriptional	1	1	1	MSMEG_1745|MSMEG_1745|transcriptional regulator|204 AA	1	1	1	1	1	1	1	1	1	1	1	0	1	1	1	1	1	1	1	1	1	0	1	1	1	1	1	1	1	1	1	0	1	1	7.4	7.4	7.4	22.655	204	204	0	3.3875	By MS/MS	By MS/MS
MSMEG_1758|MSMEG_1758|hypothetical	MSMEG_1758|MSMEG_1758|hypothetical	2	2	2	MSMEG_1758|MSMEG_1758|hypothetical protein|57 AA	1	2	2	2	2	2	2	2	2	2	2	2	2	2	2	2	2	2	2	2	2	2	2	2	2	2	2	2	2	2	2	2	2	2	73.7	73.7	73.7	6.0741	57	57	0	116.27	By MS/MS	By MS/MS
MSMEG_1760|MSMEG_1760|short-chain	MSMEG_1760|MSMEG_1760|short-chain	2	2	2	MSMEG_1760|MSMEG_1760|short-chain dehydrogenase/reductase SDR|271 AA	1	2	2	2	0	1	1	2	0	0	2	1	1	0	0	1	1	2	0	0	2	1	1	0	0	1	1	2	0	0	2	1	1	0	7	7	7	27.736	271	271	0.0013838	2.691		By matching
MSMEG_1762|MSMEG_1762|piperideine-6-carboxylic	MSMEG_1762|MSMEG_1762|piperideine-6-carboxylic	11	11	11	MSMEG_1762|MSMEG_1762|piperideine-6-carboxylic acid dehydrogenase|527 AA	1	11	11	11	7	7	6	10	7	8	8	10	10	9	7	7	6	10	7	8	8	10	10	9	7	7	6	10	7	8	8	10	10	9	37.8	37.8	37.8	54.871	527	527	0	75.992	By MS/MS	By MS/MS
MSMEG_1763|MSMEG_1763|leucine-responsive	MSMEG_1763|MSMEG_1763|leucine-responsive	2	2	2	MSMEG_1763|MSMEG_1763|leucine-responsive regulatory protein|157 AA	1	2	2	2	1	1	2	2	2	2	1	2	2	2	1	1	2	2	2	2	1	2	2	2	1	1	2	2	2	2	1	2	2	2	24.2	24.2	24.2	17.004	157	157	0	18.728	By matching	By matching
MSMEG_1768|MSMEG_1768|conserved	MSMEG_1768|MSMEG_1768|conserved	2	2	2	MSMEG_1768|MSMEG_1768|conserved hypothetical protein|205 AA	1	2	2	2	0	2	0	2	0	2	2	0	2	1	0	2	0	2	0	2	2	0	2	1	0	2	0	2	0	2	2	0	2	1	16.1	16.1	16.1	21.531	205	205	0	5.4795		By MS/MS
MSMEG_1770|MSMEG_1770|conserved	MSMEG_1770|MSMEG_1770|conserved	3	3	3	MSMEG_1770|MSMEG_1770|conserved hypothetical protein|80 AA	1	3	3	3	3	3	3	3	2	2	3	2	3	2	3	3	3	3	2	2	3	2	3	2	3	3	3	3	2	2	3	2	3	2	20	20	20	8.4242	80	80	0	8.5701	By MS/MS	By MS/MS
MSMEG_1771|MSMEG_1771|methylase,	MSMEG_1771|MSMEG_1771|methylase,	2	2	2	MSMEG_1771|MSMEG_1771|methylase, putative|222 AA	1	2	2	2	1	1	1	1	0	0	1	1	2	1	1	1	1	1	0	0	1	1	2	1	1	1	1	1	0	0	1	1	2	1	19.8	19.8	19.8	23.426	222	222	0	48.273	By MS/MS	By matching
MSMEG_1772|MSMEG_1772|conserved	MSMEG_1772|MSMEG_1772|conserved	1	1	1	MSMEG_1772|MSMEG_1772|conserved hypothetical protein|71 AA	1	1	1	1	1	1	1	0	1	1	1	1	1	1	1	1	1	0	1	1	1	1	1	1	1	1	1	0	1	1	1	1	1	1	25.4	25.4	25.4	8.0193	71	71	0.0013908	2.7444	By matching	By MS/MS
MSMEG_1773|MSMEG_1773|conserved	MSMEG_1773|MSMEG_1773|conserved	3	3	3	MSMEG_1773|MSMEG_1773|conserved hypothetical protein|340 AA	1	3	3	3	2	3	0	2	1	2	1	1	2	2	2	3	0	2	1	2	1	1	2	2	2	3	0	2	1	2	1	1	2	2	11.2	11.2	11.2	37.896	340	340	0	9.1031	By MS/MS	By MS/MS
MSMEG_1782|MSMEG_1782|oxidoreductase,	MSMEG_1782|MSMEG_1782|oxidoreductase,	9	9	9	MSMEG_1782|MSMEG_1782|oxidoreductase, short chain dehydrogenase/reductase family protein|295 AA	1	9	9	9	6	9	7	8	9	9	7	8	8	9	6	9	7	8	9	9	7	8	8	9	6	9	7	8	9	9	7	8	8	9	54.2	54.2	54.2	31.818	295	295	0	52.151	By MS/MS	By MS/MS
MSMEG_1783|MSMEG_1783|hypothetical	MSMEG_1783|MSMEG_1783|hypothetical	1	1	1	MSMEG_1783|MSMEG_1783|hypothetical protein|76 AA	1	1	1	1	1	1	1	1	1	1	1	1	1	1	1	1	1	1	1	1	1	1	1	1	1	1	1	1	1	1	1	1	1	1	17.1	17.1	17.1	8.3217	76	76	0	25.655	By MS/MS	By MS/MS
MSMEG_1786|MSMEG_1786|stas	MSMEG_1786|MSMEG_1786|stas	1	1	1	MSMEG_1786|MSMEG_1786|stas domain, putative|142 AA	1	1	1	1	0	0	1	1	1	0	0	0	0	0	0	0	1	1	1	0	0	0	0	0	0	0	1	1	1	0	0	0	0	0	14.1	14.1	14.1	15.022	142	142	0	19.134
MSMEG_1790|MSMEG_1790|conserved	MSMEG_1790|MSMEG_1790|conserved	2	2	2	MSMEG_1790|MSMEG_1790|conserved hypothetical protein|85 AA	1	2	2	2	1	2	2	1	2	2	2	2	2	2	1	2	2	1	2	2	2	2	2	2	1	2	2	1	2	2	2	2	2	2	14.1	14.1	14.1	9.4014	85	85	0.0027248	2.3586	By matching	By MS/MS
MSMEG_1794|MSMEG_1794|dehydrogenase|335	MSMEG_1794|MSMEG_1794|dehydrogenase|335	3	3	3	MSMEG_1794|MSMEG_1794|dehydrogenase|335 AA	1	3	3	3	2	2	3	3	2	2	2	2	2	2	2	2	3	3	2	2	2	2	2	2	2	2	3	3	2	2	2	2	2	2	15.5	15.5	15.5	36.208	335	335	0	15.417	By MS/MS	By MS/MS
MSMEG_1803|MSMEG_1803|RsbW	MSMEG_1803|MSMEG_1803|RsbW	2	2	2	MSMEG_1803|MSMEG_1803|RsbW protein|138 AA	1	2	2	2	2	2	2	2	2	2	2	2	2	2	2	2	2	2	2	2	2	2	2	2	2	2	2	2	2	2	2	2	2	2	16.7	16.7	16.7	14.677	138	138	0	6.6849	By MS/MS	By MS/MS
MSMEG_1804|MSMEG_1804|RNA	MSMEG_1804|MSMEG_1804|RNA	8	8	8	MSMEG_1804|MSMEG_1804|RNA polymerase sigma-F factor|250 AA	1	8	8	8	5	7	6	7	7	7	6	7	7	8	5	7	6	7	7	7	6	7	7	8	5	7	6	7	7	7	6	7	7	8	36.8	36.8	36.8	27.884	250	250	0	130.96	By MS/MS	By MS/MS
MSMEG_1805|MSMEG_1805|conserved	MSMEG_1805|MSMEG_1805|conserved	4	4	4	MSMEG_1805|MSMEG_1805|conserved hypothetical protein|118 AA	1	4	4	4	3	4	4	4	4	3	4	4	4	4	3	4	4	4	4	3	4	4	4	4	3	4	4	4	4	3	4	4	4	4	50	50	50	12.699	118	118	0	30.005	By MS/MS	By MS/MS
MSMEG_1807|MSMEG_1807|acetyl-/propionyl-coenzyme	MSMEG_1807|MSMEG_1807|acetyl-/propionyl-coenzyme	29	29	29	MSMEG_1807|MSMEG_1807|acetyl-/propionyl-coenzyme A carboxylase alpha chain|598 AA	1	29	29	29	25	28	28	29	29	29	26	29	29	29	25	28	28	29	29	29	26	29	29	29	25	28	28	29	29	29	26	29	29	29	67.1	67.1	67.1	63.137	598	598	0	323.31	By MS/MS	By MS/MS
MSMEG_1809|MSMEG_1809|putative	MSMEG_1809|MSMEG_1809|putative	17	17	17	MSMEG_1809|MSMEG_1809|putative thiosulfate sulfurtransferase|295 AA	1	17	17	17	14	17	16	17	16	16	16	15	16	14	14	17	16	17	16	16	16	15	16	14	14	17	16	17	16	16	16	15	16	14	68.5	68.5	68.5	32.85	295	295	0	247.33	By MS/MS	By MS/MS
MSMEG_1811|maf|septum	MSMEG_1811|maf|septum	4	4	4	MSMEG_1811|maf|septum formation protein Maf|211 AA	1	4	4	4	1	3	3	3	3	1	3	2	3	3	1	3	3	3	3	1	3	2	3	3	1	3	3	3	3	1	3	2	3	3	37.4	37.4	37.4	21.89	211	211	0	11.3	By matching	By MS/MS
MSMEG_1812|MSMEG_1812|conserved	MSMEG_1812|MSMEG_1812|conserved	4	4	4	MSMEG_1812|MSMEG_1812|conserved hypothetical protein|94 AA	1	4	4	4	3	4	4	4	4	4	3	4	4	3	3	4	4	4	4	4	3	4	4	3	3	4	4	4	4	4	3	4	4	3	71.3	71.3	71.3	10.342	94	94	0	57.095	By MS/MS	By MS/MS
MSMEG_1813|MSMEG_1813|propionyl-CoA	MSMEG_1813|MSMEG_1813|propionyl-CoA	26	26	26	MSMEG_1813|MSMEG_1813|propionyl-CoA carboxylase beta chain|542 AA	1	26	26	26	17	24	23	24	24	22	21	25	25	25	17	24	23	24	24	22	21	25	25	25	17	24	23	24	24	22	21	25	25	25	64.6	64.6	64.6	58.427	542	542	0	323.31	By MS/MS	By MS/MS
MSMEG_1819|purK|phosphoribosylaminoimidazole	MSMEG_1819|purK|phosphoribosylaminoimidazole	13	13	13	MSMEG_1819|purK|phosphoribosylaminoimidazole carboxylase, ATPase subunit|408 AA	1	13	13	13	9	13	12	13	13	13	12	11	13	12	9	13	12	13	13	13	12	11	13	12	9	13	12	13	13	13	12	11	13	12	58.6	58.6	58.6	43.803	408	408	0	122.41	By MS/MS	By MS/MS
MSMEG_1820|purE|phosphoribosylaminoimidazole	MSMEG_1820|purE|phosphoribosylaminoimidazole	4	4	4	MSMEG_1820|purE|phosphoribosylaminoimidazole carboxylase, catalytic subunit|159 AA	1	4	4	4	2	4	4	4	4	4	3	4	4	4	2	4	4	4	4	4	3	4	4	4	2	4	4	4	4	4	3	4	4	4	36.5	36.5	36.5	16.293	159	159	0	23.287	By MS/MS	By MS/MS
MSMEG_1821|MSMEG_1821|acyl-CoA	MSMEG_1821|MSMEG_1821|acyl-CoA	12	12	12	MSMEG_1821|MSMEG_1821|acyl-CoA dehydrogenase|389 AA	1	12	12	12	10	11	11	12	10	10	8	12	11	10	10	11	11	12	10	10	8	12	11	10	10	11	11	12	10	10	8	12	11	10	44.7	44.7	44.7	41.641	389	389	0	138.38	By MS/MS	By MS/MS
MSMEG_1822|MSMEG_1822|biotin-[acetyl-CoA-carboxylase]	MSMEG_1822|MSMEG_1822|biotin-[acetyl-CoA-carboxylase]	7	7	7	MSMEG_1822|MSMEG_1822|biotin-[acetyl-CoA-carboxylase] ligase|270 AA	1	7	7	7	6	7	7	7	7	7	7	7	7	7	6	7	7	7	7	7	7	7	7	7	6	7	7	7	7	7	7	7	7	7	35.2	35.2	35.2	28.106	270	270	0	108.79	By MS/MS	By MS/MS
MSMEG_1823|MSMEG_1823|conserved	MSMEG_1823|MSMEG_1823|conserved	6	6	6	MSMEG_1823|MSMEG_1823|conserved hypothetical protein|234 AA	1	6	6	6	4	4	4	6	5	6	5	5	6	5	4	4	4	6	5	6	5	5	6	5	4	4	4	6	5	6	5	5	6	5	32.5	32.5	32.5	24.321	234	234	0	45.9	By MS/MS	By MS/MS
MSMEG_1824|MSMEG_1824|transcriptional	MSMEG_1824|MSMEG_1824|transcriptional	7	7	7	MSMEG_1824|MSMEG_1824|transcriptional regulator, LytR family protein|493 AA	1	7	7	7	7	6	6	5	4	6	6	5	5	5	7	6	6	5	4	6	6	5	5	5	7	6	6	5	4	6	6	5	5	5	30	30	30	51.203	493	493	0	64.55	By MS/MS	By MS/MS
MSMEG_1825|rfbD|dTDP-4-dehydrorhamnose	MSMEG_1825|rfbD|dTDP-4-dehydrorhamnose	10	10	10	MSMEG_1825|rfbD|dTDP-4-dehydrorhamnose reductase|327 AA	1	10	10	10	8	9	8	7	8	8	9	8	9	8	8	9	8	7	8	8	9	8	9	8	8	9	8	7	8	8	9	8	9	8	45.9	45.9	45.9	34.254	327	327	0	144.87	By MS/MS	By MS/MS
MSMEG_1827|MSMEG_1827|hydrolase,	MSMEG_1827|MSMEG_1827|hydrolase,	3	3	3	MSMEG_1827|MSMEG_1827|hydrolase, nudix family protein, putative|182 AA	1	3	3	3	1	2	2	3	2	2	2	2	3	2	1	2	2	3	2	2	2	2	3	2	1	2	2	3	2	2	2	2	3	2	36.8	36.8	36.8	19.751	182	182	0	28.429	By MS/MS	By matching
MSMEG_1830|cofD|lppg:fo	MSMEG_1830|cofD|lppg:fo	2	2	1	MSMEG_1830|cofD|lppg:fo 2-phospho-l-lactate transferase|327 AA	1	2	2	1	0	1	1	1	0	1	1	0	1	1	0	1	1	1	0	1	1	0	1	1	0	1	1	1	0	1	1	0	1	1	9.8	9.8	5.5	34.753	327	327	0	3.6143		By matching
MSMEG_1831|MSMEG_1831|Transcription	MSMEG_1831|MSMEG_1831|Transcription	4	4	4	MSMEG_1831|MSMEG_1831|Transcription factor WhiB|129 AA	1	4	4	4	4	4	4	4	4	4	4	4	4	4	4	4	4	4	4	4	4	4	4	4	4	4	4	4	4	4	4	4	4	4	36.4	36.4	36.4	14.396	129	129	0	33.613	By MS/MS	By MS/MS
MSMEG_1832|MSMEG_1832|conserved	MSMEG_1832|MSMEG_1832|conserved	1	1	1	MSMEG_1832|MSMEG_1832|conserved hypothetical protein|154 AA	1	1	1	1	1	1	1	1	1	1	1	1	1	1	1	1	1	1	1	1	1	1	1	1	1	1	1	1	1	1	1	1	1	1	8.4	8.4	8.4	17.331	154	154	0	4.6559	By MS/MS	By matching
MSMEG_1834|MSMEG_1834|phosphomannomutase/phosphoglucomutase|472	MSMEG_1834|MSMEG_1834|phosphomannomutase/phosphoglucomutase|472	7	7	7	MSMEG_1834|MSMEG_1834|phosphomannomutase/phosphoglucomutase|472 AA	1	7	7	7	3	4	3	4	4	5	4	6	6	6	3	4	3	4	4	5	4	6	6	6	3	4	3	4	4	5	4	6	6	6	26.7	26.7	26.7	49.504	472	472	0	29.535	By MS/MS	By MS/MS
MSMEG_1836|manA|mannose-6-phosphate	MSMEG_1836|manA|mannose-6-phosphate	13	13	13	MSMEG_1836|manA|mannose-6-phosphate isomerase, class I|379 AA	1	13	13	13	10	8	11	13	11	11	12	11	13	13	10	8	11	13	11	11	12	11	13	13	10	8	11	13	11	11	12	11	13	13	50.1	50.1	50.1	41.084	379	379	0	196.17	By MS/MS	By MS/MS
MSMEG_1840|MSMEG_1840|rubredoxin|57	MSMEG_1840|MSMEG_1840|rubredoxin|57	1	1	1	MSMEG_1840|MSMEG_1840|rubredoxin|57 AA	1	1	1	1	1	1	1	1	1	1	1	1	1	1	1	1	1	1	1	1	1	1	1	1	1	1	1	1	1	1	1	1	1	1	21.1	21.1	21.1	6.4531	57	57	0.0070828	1.9612	By MS/MS	By matching
MSMEG_1841|MSMEG_1841|rubredoxin|60	MSMEG_1841|MSMEG_1841|rubredoxin|60	1	1	1	MSMEG_1841|MSMEG_1841|rubredoxin|60 AA	1	1	1	1	0	1	1	1	1	1	1	1	1	1	0	1	1	1	1	1	1	1	1	1	0	1	1	1	1	1	1	1	1	1	28.3	28.3	28.3	6.8305	60	60	0	5.8348		By MS/MS
MSMEG_1850|selA|L-seryl-tRNA	MSMEG_1850|selA|L-seryl-tRNA	5	5	5	MSMEG_1850|selA|L-seryl-tRNA selenium transferase|426 AA	1	5	5	5	3	4	4	5	3	3	5	4	4	2	3	4	4	5	3	3	5	4	4	2	3	4	4	5	3	3	5	4	4	2	17.6	17.6	17.6	43.968	426	426	0	12.442	By MS/MS	By MS/MS
MSMEG_1852|selD|selenide,	MSMEG_1852|selD|selenide,	4	4	4	MSMEG_1852|selD|selenide, water dikinase|330 AA	1	4	4	4	4	4	4	4	4	4	4	4	4	4	4	4	4	4	4	4	4	4	4	4	4	4	4	4	4	4	4	4	4	4	14.8	14.8	14.8	33.955	330	330	0	15.043	By MS/MS	By MS/MS
MSMEG_1868|MSMEG_1868|hypothetical	MSMEG_1868|MSMEG_1868|hypothetical	2	2	2	MSMEG_1868|MSMEG_1868|hypothetical protein|97 AA	1	2	2	2	2	2	2	2	2	2	2	2	2	2	2	2	2	2	2	2	2	2	2	2	2	2	2	2	2	2	2	2	2	2	33	33	33	11.001	97	97	0	188.77	By MS/MS	By MS/MS
MSMEG_1870|MSMEG_1870|conserved	MSMEG_1870|MSMEG_1870|conserved	1	1	1	MSMEG_1870|MSMEG_1870|conserved hypothetical protein|1265 AA	1	1	1	1	0	0	0	0	0	0	1	0	0	0	0	0	0	0	0	0	1	0	0	0	0	0	0	0	0	0	1	0	0	0	1.4	1.4	1.4	132.42	1265	1265	0	6.1549
MSMEG_1871|MSMEG_1871|conserved	MSMEG_1871|MSMEG_1871|conserved	1	1	1	MSMEG_1871|MSMEG_1871|conserved hypothetical protein|92 AA	1	1	1	1	1	1	1	1	1	1	1	1	1	1	1	1	1	1	1	1	1	1	1	1	1	1	1	1	1	1	1	1	1	1	12	12	12	10.452	92	92	0	3.1123	By MS/MS	By MS/MS
MSMEG_1872|MSMEG_1872|conserved	MSMEG_1872|MSMEG_1872|conserved	2	2	2	MSMEG_1872|MSMEG_1872|conserved hypothetical protein|289 AA	1	2	2	2	1	2	2	2	1	1	1	0	1	1	1	2	2	2	1	1	1	0	1	1	1	2	2	2	1	1	1	0	1	1	11.4	11.4	11.4	28.298	289	289	0	4.1354	By MS/MS	By MS/MS
MSMEG_1873|MSMEG_1873|thymidylate	MSMEG_1873|MSMEG_1873|thymidylate	3	3	3	MSMEG_1873|MSMEG_1873|thymidylate kinase|210 AA	1	3	3	3	3	3	3	3	3	3	3	3	3	3	3	3	3	3	3	3	3	3	3	3	3	3	3	3	3	3	3	3	3	3	19.5	19.5	19.5	22.683	210	210	0	24.295	By MS/MS	By MS/MS
MSMEG_1874|mtrA|DNA-binding	MSMEG_1874|mtrA|DNA-binding	4	4	4	MSMEG_1874|mtrA|DNA-binding response regulator MtrA|228 AA	1	4	4	4	3	3	3	4	3	3	3	3	3	4	3	3	3	4	3	3	3	3	3	4	3	3	3	4	3	3	3	3	3	4	27.6	27.6	27.6	25.318	228	228	0	53.256	By MS/MS	By MS/MS
MSMEG_1876|MSMEG_1876|LpqB	MSMEG_1876|MSMEG_1876|LpqB	2	2	2	MSMEG_1876|MSMEG_1876|LpqB protein|585 AA	1	2	2	2	1	2	1	2	1	1	2	1	1	1	1	2	1	2	1	1	2	1	1	1	1	2	1	2	1	1	2	1	1	1	7.5	7.5	7.5	61.397	585	585	0	4.371	By MS/MS	By matching
MSMEG_1878|MSMEG_1878|S30AE	MSMEG_1878|MSMEG_1878|S30AE	2	2	2	MSMEG_1878|MSMEG_1878|S30AE family protein|230 AA	1	2	2	2	2	1	1	1	2	2	1	0	1	1	2	1	1	1	2	2	1	0	1	1	2	1	1	1	2	2	1	0	1	1	9.1	9.1	9.1	26.398	230	230	0	4.0543	By matching	By matching
MSMEG_1881|secA|preprotein	MSMEG_1881|secA|preprotein	29	29	29	MSMEG_1881|secA|preprotein translocase, SecA subunit|953 AA	1	29	29	29	21	26	26	25	24	24	24	27	25	25	21	26	26	25	24	24	24	27	25	25	21	26	26	25	24	24	24	27	25	25	41.4	41.4	41.4	106.49	953	953	0	316.21	By MS/MS	By MS/MS
MSMEG_1883|MSMEG_1883|glycine	MSMEG_1883|MSMEG_1883|glycine	2	2	2	MSMEG_1883|MSMEG_1883|glycine betaine transporter OpuD|618 AA	1	2	2	2	1	1	1	1	1	0	1	2	2	0	1	1	1	1	1	0	1	2	2	0	1	1	1	1	1	0	1	2	2	0	6.6	6.6	6.6	65.982	618	618	0	15.214	By MS/MS	By matching
MSMEG_1884|MSMEG_1884|conserved	MSMEG_1884|MSMEG_1884|conserved	7	7	7	MSMEG_1884|MSMEG_1884|conserved hypothetical protein|165 AA	1	7	7	7	6	5	7	7	7	7	5	6	6	5	6	5	7	7	7	7	5	6	6	5	6	5	7	7	7	7	5	6	6	5	69.1	69.1	69.1	17.486	165	165	0	129.1	By MS/MS	By MS/MS
MSMEG_1887|MSMEG_1887|hypothetical	MSMEG_1887|MSMEG_1887|hypothetical	3	3	3	MSMEG_1887|MSMEG_1887|hypothetical protein|142 AA	1	3	3	3	3	3	3	3	3	3	3	3	3	3	3	3	3	3	3	3	3	3	3	3	3	3	3	3	3	3	3	3	3	3	43	43	43	14.35	142	142	0	138.94	By MS/MS	By MS/MS
MSMEG_1888|MSMEG_1888|methyltransferase|310	MSMEG_1888|MSMEG_1888|methyltransferase|310	3	2	2	MSMEG_1888|MSMEG_1888|methyltransferase|310 AA	1	3	2	2	2	3	2	2	2	3	3	2	2	2	1	2	1	1	1	2	2	1	1	1	1	2	1	1	1	2	2	1	1	1	10.3	7.7	7.7	33.14	310	310	0	5.6209	By MS/MS	By MS/MS
MSMEG_1890|aroA|3-phosphoshikimate	MSMEG_1890|aroA|3-phosphoshikimate	13	13	13	MSMEG_1890|aroA|3-phosphoshikimate 1-carboxyvinyltransferase|443 AA	1	13	13	13	6	10	12	10	13	6	8	13	11	11	6	10	12	10	13	6	8	13	11	11	6	10	12	10	13	6	8	13	11	11	49.4	49.4	49.4	45.836	443	443	0	117.38	By MS/MS	By MS/MS
MSMEG_1891|MSMEG_1891|conserved	MSMEG_1891|MSMEG_1891|conserved	5	5	5	MSMEG_1891|MSMEG_1891|conserved hypothetical protein|262 AA	1	5	5	5	4	4	3	3	3	4	4	4	5	5	4	4	3	3	3	4	4	4	5	5	4	4	3	3	3	4	4	4	5	5	32.4	32.4	32.4	28.682	262	262	0	16.475	By MS/MS	By MS/MS
MSMEG_1892|MSMEG_1892|transferase|499	MSMEG_1892|MSMEG_1892|transferase|499	2	2	2	MSMEG_1892|MSMEG_1892|transferase|499 AA	1	2	2	2	0	1	0	2	2	1	1	2	2	1	0	1	0	2	2	1	1	2	2	1	0	1	0	2	2	1	1	2	2	1	4.2	4.2	4.2	52.966	499	499	0	3.2179		By matching
MSMEG_1893|MSMEG_1893|UbiE/COQ5	MSMEG_1893|MSMEG_1893|UbiE/COQ5	1	1	1	MSMEG_1893|MSMEG_1893|UbiE/COQ5 methyltransferase|268 AA	1	1	1	1	1	1	1	1	1	0	1	1	1	1	1	1	1	1	1	0	1	1	1	1	1	1	1	1	1	0	1	1	1	1	5.2	5.2	5.2	28.152	268	268	0.00092851	2.758	By matching	By MS/MS
MSMEG_1894|MSMEG_1894|short	MSMEG_1894|MSMEG_1894|short	3	3	3	MSMEG_1894|MSMEG_1894|short chain dehydrogenase|288 AA	1	3	3	3	1	1	1	3	2	2	2	2	2	2	1	1	1	3	2	2	2	2	2	2	1	1	1	3	2	2	2	2	2	2	18.1	18.1	18.1	30.419	288	288	0	7.8752	By matching	By matching
MSMEG_1900|MSMEG_1900|D-alanyl-D-alanine	MSMEG_1900|MSMEG_1900|D-alanyl-D-alanine	1	1	1	MSMEG_1900|MSMEG_1900|D-alanyl-D-alanine carboxypeptidase family protein|185 AA	1	1	1	1	0	1	0	1	1	1	1	1	1	1	0	1	0	1	1	1	1	1	1	1	0	1	0	1	1	1	1	1	1	1	12.4	12.4	12.4	18.877	185	185	0	12.423		By matching
MSMEG_1903|MSMEG_1903|caib/baif	MSMEG_1903|MSMEG_1903|caib/baif	2	2	2	MSMEG_1903|MSMEG_1903|caib/baif family protein|799 AA	1	2	2	2	0	0	0	2	1	0	1	1	1	0	0	0	0	2	1	0	1	1	1	0	0	0	0	2	1	0	1	1	1	0	3.3	3.3	3.3	85.462	799	799	0	2.999
MSMEG_1905|MSMEG_1905|acyl-CoA	MSMEG_1905|MSMEG_1905|acyl-CoA	1	1	1	MSMEG_1905|MSMEG_1905|acyl-CoA dehydrogenase protein|371 AA	1	1	1	1	0	0	0	1	0	0	1	0	0	0	0	0	0	1	0	0	1	0	0	0	0	0	0	1	0	0	1	0	0	0	3.5	3.5	3.5	38.625	371	371	0.00046904	2.902
MSMEG_1913|ybaK|YbaK/ebsC	MSMEG_1913|ybaK|YbaK/ebsC	3	3	3	MSMEG_1913|ybaK|YbaK/ebsC protein|163 AA	1	3	3	3	3	2	3	3	3	3	3	3	2	3	3	2	3	3	3	3	3	3	2	3	3	2	3	3	3	3	3	3	2	3	24.5	24.5	24.5	16.554	163	163	0	7.5464	By matching	By MS/MS
MSMEG_1914|MSMEG_1914|RNA	MSMEG_1914|MSMEG_1914|RNA	12	12	12	MSMEG_1914|MSMEG_1914|RNA polymerase sigma-70 factor, family protein|219 AA	1	12	12	12	10	10	10	7	7	9	10	11	10	9	10	10	10	7	7	9	10	11	10	9	10	10	10	7	7	9	10	11	10	9	74.9	74.9	74.9	24.977	219	219	0	211.9	By MS/MS	By MS/MS
MSMEG_1915|MSMEG_1915|anti-sigma	MSMEG_1915|MSMEG_1915|anti-sigma	2	2	2	MSMEG_1915|MSMEG_1915|anti-sigma factor, family protein|101 AA	1	2	2	2	0	2	0	1	0	0	1	2	1	1	0	2	0	1	0	0	1	2	1	1	0	2	0	1	0	0	1	2	1	1	45.5	45.5	45.5	11.606	101	101	0	3.2404		By MS/MS
MSMEG_1917|MSMEG_1917|conserved	MSMEG_1917|MSMEG_1917|conserved	2	2	2	MSMEG_1917|MSMEG_1917|conserved domain protein|73 AA	1	2	2	2	2	2	2	2	2	2	2	2	2	2	2	2	2	2	2	2	2	2	2	2	2	2	2	2	2	2	2	2	2	2	46.6	46.6	46.6	7.6968	73	73	0	5.5117	By MS/MS	By MS/MS
MSMEG_1919|MSMEG_1919|Transcription	MSMEG_1919|MSMEG_1919|Transcription	2	2	2	MSMEG_1919|MSMEG_1919|Transcription factor WhiB|84 AA	1	2	2	2	2	2	2	2	2	2	2	2	2	1	2	2	2	2	2	2	2	2	2	1	2	2	2	2	2	2	2	2	2	1	33.3	33.3	33.3	9.3034	84	84	0	27.36	By MS/MS	By MS/MS
MSMEG_1921|MSMEG_1921|SEC-C	MSMEG_1921|MSMEG_1921|SEC-C	2	2	2	MSMEG_1921|MSMEG_1921|SEC-C motif domain protein|129 AA	1	2	2	2	0	0	1	0	2	1	0	1	1	1	0	0	1	0	2	1	0	1	1	1	0	0	1	0	2	1	0	1	1	1	16.3	16.3	16.3	14.288	129	129	0	4.1088
MSMEG_1922|aroQ|3-dehydroquinate	MSMEG_1922|aroQ|3-dehydroquinate	3	3	3	MSMEG_1922|aroQ|3-dehydroquinate dehydratase, type II|145 AA	1	3	3	3	3	3	3	3	3	3	3	2	3	3	3	3	3	3	3	3	3	2	3	3	3	3	3	3	3	3	3	2	3	3	33.1	33.1	33.1	15.59	145	145	0	49.021	By MS/MS	By MS/MS
MSMEG_1925|MSMEG_1925|isochorismate	MSMEG_1925|MSMEG_1925|isochorismate	1	1	1	MSMEG_1925|MSMEG_1925|isochorismate synthase DhbC|363 AA	1	1	1	1	1	0	1	1	1	1	1	1	1	1	1	0	1	1	1	1	1	1	1	1	1	0	1	1	1	1	1	1	1	1	4.7	4.7	4.7	37.644	363	363	0.0092267	1.8681	By MS/MS
MSMEG_1926|MSMEG_1926|phosphoglycerate	MSMEG_1926|MSMEG_1926|phosphoglycerate	8	8	8	MSMEG_1926|MSMEG_1926|phosphoglycerate mutase family protein|203 AA	1	8	8	8	8	8	6	8	7	7	8	8	8	8	8	8	6	8	7	7	8	8	8	8	8	8	6	8	7	7	8	8	8	8	43.3	43.3	43.3	22.365	203	203	0	31.656	By MS/MS	By MS/MS
MSMEG_1927|MSMEG_1927|cobyrinic	MSMEG_1927|MSMEG_1927|cobyrinic	3	3	3	MSMEG_1927|MSMEG_1927|cobyrinic Acid a,c-diamide synthase|265 AA	1	3	3	3	1	2	2	1	2	2	3	1	1	1	1	2	2	1	2	2	3	1	1	1	1	2	2	1	2	2	3	1	1	1	14.7	14.7	14.7	28.345	265	265	0	9.8694	By matching	By MS/MS
MSMEG_1928|MSMEG_1928|regulatory	MSMEG_1928|MSMEG_1928|regulatory	1	1	1	MSMEG_1928|MSMEG_1928|regulatory protein|233 AA	1	1	1	1	1	0	1	1	1	1	0	1	1	1	1	0	1	1	1	1	0	1	1	1	1	0	1	1	1	1	0	1	1	1	6.9	6.9	6.9	24.198	233	233	0	4.2942	By MS/MS
MSMEG_1930|MSMEG_1930|DEAD/DEAH	MSMEG_1930|MSMEG_1930|DEAD/DEAH	12	12	12	MSMEG_1930|MSMEG_1930|DEAD/DEAH box helicase|502 AA	1	12	12	12	6	9	8	8	9	7	9	9	9	9	6	9	8	8	9	7	9	9	9	9	6	9	8	8	9	7	9	9	9	9	37.6	37.6	37.6	54.716	502	502	0	89.566	By MS/MS	By MS/MS
MSMEG_1932|MSMEG_1932|MmpS3	MSMEG_1932|MSMEG_1932|MmpS3	3	3	3	MSMEG_1932|MSMEG_1932|MmpS3 protein|274 AA	1	3	3	3	3	3	2	3	3	3	3	3	3	3	3	3	2	3	3	3	3	3	3	3	3	3	2	3	3	3	3	3	3	3	14.6	14.6	14.6	28.398	274	274	0	40.74	By MS/MS	By MS/MS
MSMEG_1934|MSMEG_1934|ATP-binding	MSMEG_1934|MSMEG_1934|ATP-binding	8	8	8	MSMEG_1934|MSMEG_1934|ATP-binding protein|79 AA	1	8	8	8	7	8	8	7	8	7	7	8	8	7	7	8	8	7	8	7	7	8	8	7	7	8	8	7	8	7	7	8	8	7	93.7	93.7	93.7	8.4474	79	79	0	53.826	By MS/MS	By MS/MS
MSMEG_1935|MSMEG_1935|TetR-family	MSMEG_1935|MSMEG_1935|TetR-family	2	2	2	MSMEG_1935|MSMEG_1935|TetR-family protein transcriptional regulator|219 AA	1	2	2	2	2	1	1	2	1	0	2	2	2	2	2	1	1	2	1	0	2	2	2	2	2	1	1	2	1	0	2	2	2	2	15.5	15.5	15.5	24.41	219	219	0	50.306	By MS/MS	By MS/MS
MSMEG_1936|MSMEG_1936|conserved	MSMEG_1936|MSMEG_1936|conserved	6	6	6	MSMEG_1936|MSMEG_1936|conserved hypothetical protein|344 AA	1	6	6	6	6	6	5	5	4	5	6	5	6	5	6	6	5	5	4	5	6	5	6	5	6	6	5	5	4	5	6	5	6	5	23.5	23.5	23.5	37.341	344	344	0	18.239	By MS/MS	By matching
MSMEG_1937|MSMEG_1937|molybdopterin	MSMEG_1937|MSMEG_1937|molybdopterin	2	2	2	MSMEG_1937|MSMEG_1937|molybdopterin biosynthesis protein MoeB|396 AA	1	2	2	2	2	2	2	2	2	2	2	2	2	2	2	2	2	2	2	2	2	2	2	2	2	2	2	2	2	2	2	2	2	2	8.1	8.1	8.1	42.89	396	396	0	4.6687	By matching	By MS/MS
MSMEG_1940|MSMEG_1940|hydrolase,	MSMEG_1940|MSMEG_1940|hydrolase,	3	3	3	MSMEG_1940|MSMEG_1940|hydrolase, alpha/beta fold family protein|253 AA	1	3	3	3	1	0	1	3	2	0	2	2	2	1	1	0	1	3	2	0	2	2	2	1	1	0	1	3	2	0	2	2	2	1	15.8	15.8	15.8	27.464	253	253	0	5.5184	By matching
MSMEG_1943|MSMEG_1943|ATP-dependent	MSMEG_1943|MSMEG_1943|ATP-dependent	2	2	2	MSMEG_1943|MSMEG_1943|ATP-dependent DNA helicase|1087 AA	1	2	2	2	1	1	1	1	1	1	1	2	1	1	1	1	1	1	1	1	1	2	1	1	1	1	1	1	1	1	1	2	1	1	3.3	3.3	3.3	117.21	1087	1087	0	3.5069	By matching	By MS/MS
MSMEG_1945|MSMEG_1945|ion	MSMEG_1945|MSMEG_1945|ion	5	5	5	MSMEG_1945|MSMEG_1945|ion channel membrane protein|364 AA	1	5	5	5	3	4	5	5	3	3	3	5	4	4	3	4	5	5	3	3	3	5	4	4	3	4	5	5	3	3	3	5	4	4	29.7	29.7	29.7	39.147	364	364	0	58.169	By MS/MS	By MS/MS
MSMEG_1946|MSMEG_1946|NADH	MSMEG_1946|MSMEG_1946|NADH	7	7	7	MSMEG_1946|MSMEG_1946|NADH pyrophosphatase|311 AA	1	7	7	7	5	6	5	7	5	6	6	6	7	7	5	6	5	7	5	6	6	6	7	7	5	6	5	7	5	6	6	6	7	7	32.2	32.2	32.2	34.139	311	311	0	100.17	By MS/MS	By MS/MS
MSMEG_1947|MSMEG_1947|conserved	MSMEG_1947|MSMEG_1947|conserved	3	3	3	MSMEG_1947|MSMEG_1947|conserved hypothetical protein|82 AA	1	3	3	3	3	3	3	3	3	3	3	3	3	3	3	3	3	3	3	3	3	3	3	3	3	3	3	3	3	3	3	3	3	3	82.9	82.9	82.9	8.6538	82	82	0	118.39	By MS/MS	By MS/MS
MSMEG_1950|MSMEG_1950|conserved	MSMEG_1950|MSMEG_1950|conserved	8	8	8	MSMEG_1950|MSMEG_1950|conserved hypothetical protein|189 AA	1	8	8	8	8	8	8	8	8	8	8	8	8	8	8	8	8	8	8	8	8	8	8	8	8	8	8	8	8	8	8	8	8	8	38.1	38.1	38.1	20.246	189	189	0	290.55	By MS/MS	By MS/MS
MSMEG_1951|MSMEG_1951|conserved	MSMEG_1951|MSMEG_1951|conserved	10	10	10	MSMEG_1951|MSMEG_1951|conserved domain protein|220 AA	1	10	10	10	9	10	9	6	9	10	9	9	9	10	9	10	9	6	9	10	9	9	9	10	9	10	9	6	9	10	9	9	9	10	44.1	44.1	44.1	24.748	220	220	0	170.59	By MS/MS	By MS/MS
MSMEG_1954|MSMEG_1954|ABC1	MSMEG_1954|MSMEG_1954|ABC1	4	4	4	MSMEG_1954|MSMEG_1954|ABC1 family protein|439 AA	1	4	4	4	2	3	3	2	3	2	2	3	2	3	2	3	3	2	3	2	2	3	2	3	2	3	3	2	3	2	2	3	2	3	12.3	12.3	12.3	47.854	439	439	0	14.803	By MS/MS	By MS/MS
MSMEG_1957|MSMEG_1957|conserved	MSMEG_1957|MSMEG_1957|conserved	17	17	17	MSMEG_1957|MSMEG_1957|conserved hypothetical protein|469 AA	1	17	17	17	12	15	14	14	14	16	16	14	13	13	12	15	14	14	14	16	16	14	13	13	12	15	14	14	14	16	16	14	13	13	54.4	54.4	54.4	49.397	469	469	0	151.33	By MS/MS	By MS/MS
MSMEG_1958|MSMEG_1958|PDZ	MSMEG_1958|MSMEG_1958|PDZ	4	4	4	MSMEG_1958|MSMEG_1958|PDZ domain family protein|345 AA	1	4	4	4	4	3	3	4	4	4	4	4	3	3	4	3	3	4	4	4	4	4	3	3	4	3	3	4	4	4	4	4	3	3	13.6	13.6	13.6	36.182	345	345	0	13.125	By MS/MS	By MS/MS
MSMEG_1959|MSMEG_1959|putative	MSMEG_1959|MSMEG_1959|putative	10	10	10	MSMEG_1959|MSMEG_1959|putative membrane protein|1003 AA	1	10	10	10	6	6	6	9	7	7	6	4	9	8	6	6	6	9	7	7	6	4	9	8	6	6	6	9	7	7	6	4	9	8	20.6	20.6	20.6	109.09	1003	1003	0	149.57	By MS/MS	By MS/MS
MSMEG_1961|MSMEG_1961|conserved	MSMEG_1961|MSMEG_1961|conserved	4	4	4	MSMEG_1961|MSMEG_1961|conserved hypothetical protein|391 AA	1	4	4	4	2	2	3	2	2	4	4	3	3	3	2	2	3	2	2	4	4	3	3	3	2	2	3	2	2	4	4	3	3	3	15.3	15.3	15.3	41.638	391	391	0	3.8019	By matching	By MS/MS
MSMEG_1977|MSMEG_1977|alcohol	MSMEG_1977|MSMEG_1977|alcohol	7	7	7	MSMEG_1977|MSMEG_1977|alcohol dehydrogenase|341 AA	1	7	7	7	3	5	4	5	4	4	4	4	5	5	3	5	4	5	4	4	4	4	5	5	3	5	4	5	4	4	4	4	5	5	43.7	43.7	43.7	35.861	341	341	0	23.756	By MS/MS	By MS/MS
MSMEG_1979|MSMEG_1979|antibiotic	MSMEG_1979|MSMEG_1979|antibiotic	1	1	1	MSMEG_1979|MSMEG_1979|antibiotic biosynthesis monooxygenase|113 AA	1	1	1	1	1	1	0	1	1	1	1	1	1	0	1	1	0	1	1	1	1	1	1	0	1	1	0	1	1	1	1	1	1	0	13.3	13.3	13.3	12.851	113	113	0	25.183	By matching	By MS/MS
MSMEG_1981|MSMEG_1981|conserved	MSMEG_1981|MSMEG_1981|conserved	1	1	1	MSMEG_1981|MSMEG_1981|conserved hypothetical protein|162 AA	1	1	1	1	0	0	0	1	0	0	0	0	0	1	0	0	0	1	0	0	0	0	0	1	0	0	0	1	0	0	0	0	0	1	12.3	12.3	12.3	18.176	162	162	0	5.9253
MSMEG_1982|MSMEG_1982|acyl-CoA	MSMEG_1982|MSMEG_1982|acyl-CoA	3	3	3	MSMEG_1982|MSMEG_1982|acyl-CoA synthase|515 AA	1	3	3	3	1	2	2	1	1	2	2	1	1	1	1	2	2	1	1	2	2	1	1	1	1	2	2	1	1	2	2	1	1	1	8.5	8.5	8.5	56.002	515	515	0	3.9831	By matching	By MS/MS
MSMEG_1996|MSMEG_1996|N5,N10-	MSMEG_1996|MSMEG_1996|N5,N10-	8	8	8	MSMEG_1996|MSMEG_1996|N5,N10- methylenetetrahydromethanopterin reductase-related protein|287 AA	1	8	8	8	5	6	6	8	6	5	6	8	8	8	5	6	6	8	6	5	6	8	8	8	5	6	6	8	6	5	6	8	8	8	38	38	38	31.608	287	287	0	86.641	By MS/MS	By MS/MS
MSMEG_2007|MSMEG_2007|putative	MSMEG_2007|MSMEG_2007|putative	6	6	6	MSMEG_2007|MSMEG_2007|putative HpcE protein|287 AA	1	6	6	6	4	3	3	3	2	2	2	5	4	4	4	3	3	3	2	2	2	5	4	4	4	3	3	3	2	2	2	5	4	4	26.1	26.1	26.1	30.826	287	287	0	10.004	By MS/MS	By MS/MS
MSMEG_2010|MSMEG_2010|stress	MSMEG_2010|MSMEG_2010|stress	3	3	3	MSMEG_2010|MSMEG_2010|stress responsive A/B Barrel Domain superfamily protein|105 AA	1	3	3	3	3	3	3	3	3	3	3	3	3	3	3	3	3	3	3	3	3	3	3	3	3	3	3	3	3	3	3	3	3	3	53.3	53.3	53.3	11.541	105	105	0	24.402	By MS/MS	By MS/MS
MSMEG_2016|modA|molybdate	MSMEG_2016|modA|molybdate	1	1	1	MSMEG_2016|modA|molybdate ABC transporter, periplasmic molybdate-binding protein|247 AA	1	1	1	1	1	1	1	1	0	1	0	1	1	1	1	1	1	1	0	1	0	1	1	1	1	1	1	1	0	1	0	1	1	1	6.9	6.9	6.9	24.954	247	247	0	4.1681	By MS/MS	By MS/MS
MSMEG_2019|MSMEG_2019|short-chain	MSMEG_2019|MSMEG_2019|short-chain	4	4	4	MSMEG_2019|MSMEG_2019|short-chain dehydrogenase/reductase SDR|248 AA	1	4	4	4	2	3	3	4	3	2	3	4	4	4	2	3	3	4	3	2	3	4	4	4	2	3	3	4	3	2	3	4	4	4	25.4	25.4	25.4	26.113	248	248	0	10.019	By matching	By matching
MSMEG_2026|MSMEG_2026|short	MSMEG_2026|MSMEG_2026|short	11	11	11	MSMEG_2026|MSMEG_2026|short chain dehydrogenase|276 AA	1	11	11	11	11	9	11	10	9	10	10	10	10	9	11	9	11	10	9	10	10	10	10	9	11	9	11	10	9	10	10	10	10	9	65.2	65.2	65.2	28.711	276	276	0	171.41	By MS/MS	By MS/MS
MSMEG_2027|MSMEG_2027|conserved	MSMEG_2027|MSMEG_2027|conserved	7	7	7	MSMEG_2027|MSMEG_2027|conserved hypothetical protein TIGR00026|140 AA	1	7	7	7	5	7	6	6	6	4	6	7	6	6	5	7	6	6	6	4	6	7	6	6	5	7	6	6	6	4	6	7	6	6	62.1	62.1	62.1	16.006	140	140	0	33.464	By MS/MS	By MS/MS
MSMEG_2029|MSMEG_2029|3-ketoacyl-ACP/CoA	MSMEG_2029|MSMEG_2029|3-ketoacyl-ACP/CoA	5	5	5	MSMEG_2029|MSMEG_2029|3-ketoacyl-ACP/CoA redutase|253 AA	1	5	5	5	2	2	4	2	4	4	3	2	4	4	2	2	4	2	4	4	3	2	4	4	2	2	4	2	4	4	3	2	4	4	36.4	36.4	36.4	26.602	253	253	0	31.359	By MS/MS	By MS/MS
MSMEG_2033|MSMEG_2033|oxidoreductase,	MSMEG_2033|MSMEG_2033|oxidoreductase,	8	8	8	MSMEG_2033|MSMEG_2033|oxidoreductase, zinc-binding dehydrogenase family protein|323 AA	1	8	8	8	6	6	7	7	7	7	7	8	6	7	6	6	7	7	7	7	7	8	6	7	6	6	7	7	7	7	7	8	6	7	48	48	48	33.454	323	323	0	65.055	By MS/MS	By MS/MS
MSMEG_2038|MSMEG_2038|monooxygenase,	MSMEG_2038|MSMEG_2038|monooxygenase,	1	1	1	MSMEG_2038|MSMEG_2038|monooxygenase, flavin-binding family protein|519 AA	1	1	1	1	1	1	1	1	1	1	1	1	1	1	1	1	1	1	1	1	1	1	1	1	1	1	1	1	1	1	1	1	1	1	4	4	4	58.158	519	519	0	7.8999	By matching	By MS/MS
MSMEG_2042|MSMEG_2042|phosphotransferase	MSMEG_2042|MSMEG_2042|phosphotransferase	2	2	2	MSMEG_2042|MSMEG_2042|phosphotransferase enzyme family protein|378 AA	1	2	2	2	0	1	1	0	1	2	0	1	1	2	0	1	1	0	1	2	0	1	1	2	0	1	1	0	1	2	0	1	1	2	9.5	9.5	9.5	42.146	378	378	0	2.954		By matching
MSMEG_2045|MSMEG_2045|monoxygenase|454	MSMEG_2045|MSMEG_2045|monoxygenase|454	5	5	5	MSMEG_2045|MSMEG_2045|monoxygenase|454 AA	1	5	5	5	4	3	5	4	3	4	3	3	5	4	4	3	5	4	3	4	3	3	5	4	4	3	5	4	3	4	3	3	5	4	16.1	16.1	16.1	49.542	454	454	0	54.047	By MS/MS	By MS/MS
MSMEG_2048|MSMEG_2048|alcohol	MSMEG_2048|MSMEG_2048|alcohol	3	3	3	MSMEG_2048|MSMEG_2048|alcohol dehydrogenase|344 AA	1	3	3	3	2	1	1	3	3	1	3	2	3	2	2	1	1	3	3	1	3	2	3	2	2	1	1	3	3	1	3	2	3	2	18.3	18.3	18.3	35.35	344	344	0	14.194	By MS/MS	By matching
MSMEG_2064|MSMEG_2064|two-component	MSMEG_2064|MSMEG_2064|two-component	4	4	4	MSMEG_2064|MSMEG_2064|two-component system response regulator|132 AA	1	4	4	4	1	2	2	2	1	1	4	2	2	4	1	2	2	2	1	1	4	2	2	4	1	2	2	2	1	1	4	2	2	4	31.1	31.1	31.1	14.104	132	132	0	12.162	By MS/MS	By MS/MS
MSMEG_2066|MSMEG_2066|conserved	MSMEG_2066|MSMEG_2066|conserved	5	5	5	MSMEG_2066|MSMEG_2066|conserved hypothetical protein|133 AA	1	5	5	5	4	5	5	5	5	4	4	4	3	4	4	5	5	5	5	4	4	4	3	4	4	5	5	5	5	4	4	4	3	4	44.4	44.4	44.4	14.998	133	133	0	12.208	By MS/MS	By MS/MS
MSMEG_2067|MSMEG_2067|methyltransferase	MSMEG_2067|MSMEG_2067|methyltransferase	4	4	4	MSMEG_2067|MSMEG_2067|methyltransferase type 12|211 AA	1	4	4	4	4	2	3	4	3	3	4	4	4	4	4	2	3	4	3	3	4	4	4	4	4	2	3	4	3	3	4	4	4	4	34.1	34.1	34.1	22.69	211	211	0	12.744	By MS/MS	By matching
MSMEG_2068|MSMEG_2068|hypothetical	MSMEG_2068|MSMEG_2068|hypothetical	3	3	3	MSMEG_2068|MSMEG_2068|hypothetical protein|118 AA	1	3	3	3	2	2	2	3	3	2	2	2	3	3	2	2	2	3	3	2	2	2	3	3	2	2	2	3	3	2	2	2	3	3	41.5	41.5	41.5	12.438	118	118	0	17.135	By MS/MS	By MS/MS
MSMEG_2070|MSMEG_2070|acyl-CoA	MSMEG_2070|MSMEG_2070|acyl-CoA	11	11	11	MSMEG_2070|MSMEG_2070|acyl-CoA dehydrogenase family protein|414 AA	1	11	11	11	6	9	7	8	9	8	9	8	9	10	6	9	7	8	9	8	9	8	9	10	6	9	7	8	9	8	9	8	9	10	30.9	30.9	30.9	47.292	414	414	0	61.031	By MS/MS	By MS/MS
MSMEG_2072|MSMEG_2072|3-hydroxy-3-methylglutaryl-CoA	MSMEG_2072|MSMEG_2072|3-hydroxy-3-methylglutaryl-CoA	8	8	8	MSMEG_2072|MSMEG_2072|3-hydroxy-3-methylglutaryl-CoA lyase|300 AA	1	8	8	8	5	5	7	6	7	6	5	6	7	6	5	5	7	6	7	6	5	6	7	6	5	5	7	6	7	6	5	6	7	6	41.3	41.3	41.3	31.079	300	300	0	31.055	By MS/MS	By MS/MS
MSMEG_2073|MSMEG_2073|CAIB/BAIF	MSMEG_2073|MSMEG_2073|CAIB/BAIF	9	9	9	MSMEG_2073|MSMEG_2073|CAIB/BAIF family protein|400 AA	1	9	9	9	4	6	7	8	7	7	6	7	8	9	4	6	7	8	7	7	6	7	8	9	4	6	7	8	7	7	6	7	8	9	34	34	34	42.847	400	400	0	21.62	By MS/MS	By MS/MS
MSMEG_2074|MSMEG_2074|conserved	MSMEG_2074|MSMEG_2074|conserved	8	8	8	MSMEG_2074|MSMEG_2074|conserved hypothetical protein|409 AA	1	8	8	8	4	6	5	7	6	6	6	6	6	8	4	6	5	7	6	6	6	6	6	8	4	6	5	7	6	6	6	6	6	8	31.3	31.3	31.3	44.867	409	409	0	104.77	By MS/MS	By MS/MS
MSMEG_2078|MSMEG_2078|antigen	MSMEG_2078|MSMEG_2078|antigen	11	11	11	MSMEG_2078|MSMEG_2078|antigen 85-C|325 AA	1	11	11	11	5	10	7	9	8	8	10	8	9	8	5	10	7	9	8	8	10	8	9	8	5	10	7	9	8	8	10	8	9	8	54.5	54.5	54.5	35.189	325	325	0	203.4	By MS/MS	By MS/MS
MSMEG_2079|MSMEG_2079|alcohol	MSMEG_2079|MSMEG_2079|alcohol	8	8	8	MSMEG_2079|MSMEG_2079|alcohol dehydrogenase|332 AA	1	8	8	8	6	7	7	7	7	7	7	7	7	7	6	7	7	7	7	7	7	7	7	7	6	7	7	7	7	7	7	7	7	7	44.6	44.6	44.6	33.873	332	332	0	60.853	By MS/MS	By MS/MS
MSMEG_2080|MSMEG_2080|putative	MSMEG_2080|MSMEG_2080|putative	13	13	13	MSMEG_2080|MSMEG_2080|putative acyl-CoA dehydrogenase|406 AA	1	13	13	13	9	11	9	10	8	9	9	9	11	10	9	11	9	10	8	9	9	9	11	10	9	11	9	10	8	9	9	9	11	10	39.4	39.4	39.4	43.507	406	406	0	228.4	By MS/MS	By MS/MS
MSMEG_2081|MSMEG_2081|putative	MSMEG_2081|MSMEG_2081|putative	9	9	9	MSMEG_2081|MSMEG_2081|putative acyl-CoA dehydrogenase|442 AA	1	9	9	9	6	9	9	7	8	8	8	8	9	8	6	9	9	7	8	8	8	8	9	8	6	9	9	7	8	8	8	8	9	8	40.3	40.3	40.3	47.078	442	442	0	111.69	By MS/MS	By MS/MS
MSMEG_2083|MSMEG_2083|inositol	MSMEG_2083|MSMEG_2083|inositol	5	5	5	MSMEG_2083|MSMEG_2083|inositol monophosphatase|260 AA	1	5	5	5	3	4	3	4	4	4	3	4	4	5	3	4	3	4	4	4	3	4	4	5	3	4	3	4	4	4	3	4	4	5	26.2	26.2	26.2	27.719	260	260	0	19.132	By MS/MS	By MS/MS
MSMEG_2086|prfB|peptide	MSMEG_2086|prfB|peptide	17	17	17	MSMEG_2086|prfB|peptide chain release factor 2|368 AA	1	17	17	17	12	15	14	16	15	13	13	16	16	15	12	15	14	16	15	13	13	16	16	15	12	15	14	16	15	13	13	16	16	15	68.5	68.5	68.5	41.242	368	368	0	158.12	By MS/MS	By MS/MS
MSMEG_2089|ftsE|cell	MSMEG_2089|ftsE|cell	3	3	3	MSMEG_2089|ftsE|cell division ATP-binding protein FtsE|229 AA	1	3	3	3	3	3	3	2	3	3	2	3	2	2	3	3	3	2	3	3	2	3	2	2	3	3	3	2	3	3	2	3	2	2	14.8	14.8	14.8	25.455	229	229	0	5.5077	By MS/MS	By matching
MSMEG_2092|MSMEG_2092|D-aminopeptidase|367	MSMEG_2092|MSMEG_2092|D-aminopeptidase|367	5	5	5	MSMEG_2092|MSMEG_2092|D-aminopeptidase|367 AA	1	5	5	5	4	4	4	5	5	5	4	5	5	4	4	4	4	5	5	5	4	5	5	4	4	4	4	5	5	5	4	5	5	4	18.8	18.8	18.8	38.243	367	367	0	37.428	By MS/MS	By MS/MS
MSMEG_2095|MSMEG_2095|serine	MSMEG_2095|MSMEG_2095|serine	2	2	2	MSMEG_2095|MSMEG_2095|serine esterase, cutinase family protein|307 AA	1	2	2	2	2	0	2	2	2	2	2	2	1	2	2	0	2	2	2	2	2	2	1	2	2	0	2	2	2	2	2	2	1	2	6.5	6.5	6.5	30.875	307	307	0	3.9502	By MS/MS
MSMEG_2111|MSMEG_2111|chorismate	MSMEG_2111|MSMEG_2111|chorismate	7	7	7	MSMEG_2111|MSMEG_2111|chorismate mutase|181 AA	1	7	7	7	6	7	6	6	6	6	6	6	6	6	6	7	6	6	6	6	6	6	6	6	6	7	6	6	6	6	6	6	6	6	49.2	49.2	49.2	19.49	181	181	0	35.09	By MS/MS	By MS/MS
MSMEG_2112|MSMEG_2112|secreted	MSMEG_2112|MSMEG_2112|secreted	4	4	4	MSMEG_2112|MSMEG_2112|secreted protein|194 AA	1	4	4	4	2	2	2	3	3	4	2	3	3	4	2	2	2	3	3	4	2	3	3	4	2	2	2	3	3	4	2	3	3	4	21.6	21.6	21.6	21.997	194	194	0	10.191	By matching	By MS/MS
MSMEG_2115|MSMEG_2115|conserved	MSMEG_2115|MSMEG_2115|conserved	5	5	5	MSMEG_2115|MSMEG_2115|conserved hypothetical protein|177 AA	1	5	5	5	3	5	4	4	3	3	3	4	4	4	3	5	4	4	3	3	3	4	4	4	3	5	4	4	3	3	3	4	4	4	32.2	32.2	32.2	18.976	177	177	0	221.08	By MS/MS	By MS/MS
MSMEG_2116|MSMEG_2116|PTS	MSMEG_2116|MSMEG_2116|PTS	2	2	2	MSMEG_2116|MSMEG_2116|PTS system, glucose-specific IIBC component|527 AA	1	2	2	2	1	1	1	2	1	1	1	1	1	1	1	1	1	2	1	1	1	1	1	1	1	1	1	2	1	1	1	1	1	1	5.1	5.1	5.1	55.663	527	527	0	7.9936	By matching	By MS/MS
MSMEG_2117|MSMEG_2117|beta-glucoside-specific	MSMEG_2117|MSMEG_2117|beta-glucoside-specific	6	6	6	MSMEG_2117|MSMEG_2117|beta-glucoside-specific EII permease|156 AA	1	6	6	6	5	5	5	5	6	6	5	6	5	5	5	5	5	5	6	6	5	6	5	5	5	5	5	5	6	6	5	6	5	5	59.6	59.6	59.6	15.8	156	156	0	60.661	By MS/MS	By MS/MS
MSMEG_2118|nagB|glucosamine-6-phosphate	MSMEG_2118|nagB|glucosamine-6-phosphate	8	8	8	MSMEG_2118|nagB|glucosamine-6-phosphate isomerase|261 AA	1	8	8	8	4	6	6	7	7	5	5	7	8	6	4	6	6	7	7	5	5	7	8	6	4	6	6	7	7	5	5	7	8	6	55.9	55.9	55.9	28.038	261	261	0	46.723	By MS/MS	By MS/MS
MSMEG_2119|nagA|N-acetylglucosamine-6-phosphate	MSMEG_2119|nagA|N-acetylglucosamine-6-phosphate	7	7	7	MSMEG_2119|nagA|N-acetylglucosamine-6-phosphate deacetylase|385 AA	1	7	7	7	4	4	5	5	4	4	5	6	7	6	4	4	5	5	4	4	5	6	7	6	4	4	5	5	4	4	5	6	7	6	24.2	24.2	24.2	39.466	385	385	0	27.559	By MS/MS	By MS/MS
MSMEG_2122|MSMEG_2122|dihydroxyacetone	MSMEG_2122|MSMEG_2122|dihydroxyacetone	7	7	7	MSMEG_2122|MSMEG_2122|dihydroxyacetone kinase, L subunit|210 AA	1	7	7	7	4	5	6	6	5	4	4	5	3	5	4	5	6	6	5	4	4	5	3	5	4	5	6	6	5	4	4	5	3	5	69.5	69.5	69.5	21.395	210	210	0	34.931	By MS/MS	By MS/MS
MSMEG_2123|dhaK|dihydroxyacetone	MSMEG_2123|dhaK|dihydroxyacetone	7	7	7	MSMEG_2123|dhaK|dihydroxyacetone kinase, DhaK subunit|332 AA	1	7	7	7	4	3	5	6	6	6	4	7	7	7	4	3	5	6	6	6	4	7	7	7	4	3	5	6	6	6	4	7	7	7	29.2	29.2	29.2	34.58	332	332	0	55.182	By MS/MS	By MS/MS
MSMEG_2127|MSMEG_2127|conserved	MSMEG_2127|MSMEG_2127|conserved	2	2	2	MSMEG_2127|MSMEG_2127|conserved hypothetical protein|119 AA	1	2	2	2	2	2	2	2	2	2	2	2	2	2	2	2	2	2	2	2	2	2	2	2	2	2	2	2	2	2	2	2	2	2	21	21	21	13.418	119	119	0	46.16	By MS/MS	By matching
MSMEG_2128|MSMEG_2128|malonyl	MSMEG_2128|MSMEG_2128|malonyl	1	1	1	MSMEG_2128|MSMEG_2128|malonyl CoA decarboxylase|215 AA	1	1	1	1	1	0	1	1	1	1	1	1	0	1	1	0	1	1	1	1	1	1	0	1	1	0	1	1	1	1	1	1	0	1	7.9	7.9	7.9	24.46	215	215	0	11.689	By MS/MS
MSMEG_2130|MSMEG_2130|putative	MSMEG_2130|MSMEG_2130|putative	4	4	4	MSMEG_2130|MSMEG_2130|putative acyl-CoA dehydrogenase|394 AA	1	4	4	4	1	2	2	2	2	1	2	2	3	3	1	2	2	2	2	1	2	2	3	3	1	2	2	2	2	1	2	2	3	3	18.3	18.3	18.3	42.653	394	394	0	8.1773	By matching	By MS/MS
MSMEG_2132|MSMEG_2132|acyl	MSMEG_2132|MSMEG_2132|acyl	3	3	3	MSMEG_2132|MSMEG_2132|acyl carrier protein Acp|89 AA	1	3	3	3	2	2	2	3	2	2	2	3	2	2	2	2	2	3	2	2	2	3	2	2	2	2	2	3	2	2	2	3	2	2	58.4	58.4	58.4	9.4896	89	89	0	26.371	By MS/MS	By matching
MSMEG_2136|pgm|phosphoglucomutase,	MSMEG_2136|pgm|phosphoglucomutase,	20	20	20	MSMEG_2136|pgm|phosphoglucomutase, alpha-D-glucose phosphate-specific|544 AA	1	20	20	20	14	17	14	19	17	13	15	17	18	18	14	17	14	19	17	13	15	17	18	18	14	17	14	19	17	13	15	17	18	18	58.1	58.1	58.1	57.9	544	544	0	139.66	By MS/MS	By MS/MS
MSMEG_2163|MSMEG_2163|aldehyde	MSMEG_2163|MSMEG_2163|aldehyde	7	7	7	MSMEG_2163|MSMEG_2163|aldehyde dehydrogenase|480 AA	1	7	7	7	5	6	5	6	6	5	5	7	7	6	5	6	5	6	6	5	5	7	7	6	5	6	5	6	6	5	5	7	7	6	19.6	19.6	19.6	50.326	480	480	0	14.431	By MS/MS	By MS/MS
MSMEG_2173|MSMEG_2173|GntR-family	MSMEG_2173|MSMEG_2173|GntR-family	2	2	2	MSMEG_2173|MSMEG_2173|GntR-family protein transcriptional regulator|230 AA	1	2	2	2	0	1	1	1	1	1	2	2	2	2	0	1	1	1	1	1	2	2	2	2	0	1	1	1	1	1	2	2	2	2	11.3	11.3	11.3	25.285	230	230	0.0066964	2.0358		By MS/MS
MSMEG_2174|MSMEG_2174|superfamily	MSMEG_2174|MSMEG_2174|superfamily	4	4	4	MSMEG_2174|MSMEG_2174|superfamily protein I DNA or RNA helicase|736 AA	1	4	4	4	3	3	3	4	3	3	3	3	4	4	3	3	3	4	3	3	3	3	4	4	3	3	3	4	3	3	3	3	4	4	10.2	10.2	10.2	81.198	736	736	0	32.215	By MS/MS	By matching
MSMEG_2176|MSMEG_2176|conserved	MSMEG_2176|MSMEG_2176|conserved	2	2	2	MSMEG_2176|MSMEG_2176|conserved hypothetical protein|108 AA	1	2	2	2	2	2	2	2	2	2	2	2	2	2	2	2	2	2	2	2	2	2	2	2	2	2	2	2	2	2	2	2	2	2	27.8	27.8	27.8	11.59	108	108	0	24.109	By MS/MS	By MS/MS
MSMEG_2189|atzF|allophanate	MSMEG_2189|atzF|allophanate	9	9	9	MSMEG_2189|atzF|allophanate hydrolase|556 AA	1	9	9	9	7	6	7	9	8	6	7	9	8	8	7	6	7	9	8	6	7	9	8	8	7	6	7	9	8	6	7	9	8	8	31.7	31.7	31.7	57.456	556	556	0	91.402	By MS/MS	By MS/MS
MSMEG_2192|MSMEG_2192|conserved	MSMEG_2192|MSMEG_2192|conserved	3	3	3	MSMEG_2192|MSMEG_2192|conserved hypothetical protein|133 AA	1	3	3	3	1	2	2	3	3	3	3	3	3	3	1	2	2	3	3	3	3	3	3	3	1	2	2	3	3	3	3	3	3	3	41.4	41.4	41.4	14.677	133	133	0	16.297	By MS/MS	By matching
MSMEG_2194|MSMEG_2194|MerR-family	MSMEG_2194|MSMEG_2194|MerR-family	3	3	3	MSMEG_2194|MSMEG_2194|MerR-family protein transcriptional regulator|257 AA	1	3	3	3	1	1	0	2	2	1	1	1	1	1	1	1	0	2	2	1	1	1	1	1	1	1	0	2	2	1	1	1	1	1	13.2	13.2	13.2	29.145	257	257	0	3.1196	By matching	By matching
MSMEG_2197|MSMEG_2197|hypothetical	MSMEG_2197|MSMEG_2197|hypothetical	3	3	3	MSMEG_2197|MSMEG_2197|hypothetical protein|275 AA	1	3	3	3	2	2	2	2	2	2	3	2	2	2	2	2	2	2	2	2	3	2	2	2	2	2	2	2	2	2	3	2	2	2	13.5	13.5	13.5	29.302	275	275	0	19.519	By MS/MS	By MS/MS
MSMEG_2201|MSMEG_2201|ZbpA	MSMEG_2201|MSMEG_2201|ZbpA	3	3	3	MSMEG_2201|MSMEG_2201|ZbpA protein|150 AA	1	3	3	3	3	3	3	3	3	3	3	3	3	3	3	3	3	3	3	3	3	3	3	3	3	3	3	3	3	3	3	3	3	3	41.3	41.3	41.3	16.314	150	150	0	126.71	By MS/MS	By MS/MS
MSMEG_2205|MSMEG_2205|putative	MSMEG_2205|MSMEG_2205|putative	5	5	5	MSMEG_2205|MSMEG_2205|putative acyl-CoA dehydrogenase|397 AA	1	5	5	5	3	4	2	5	3	3	3	5	5	5	3	4	2	5	3	3	3	5	5	5	3	4	2	5	3	3	3	5	5	5	20.2	20.2	20.2	41.984	397	397	0	18.596	By MS/MS	By matching
MSMEG_2206|fabG|3-oxoacyl-(acyl-carrier-protein)	MSMEG_2206|fabG|3-oxoacyl-(acyl-carrier-protein)	4	4	4	MSMEG_2206|fabG|3-oxoacyl-(acyl-carrier-protein) reductase|244 AA	1	4	4	4	4	3	3	3	4	3	4	3	3	4	4	3	3	3	4	3	4	3	3	4	4	3	3	3	4	3	4	3	3	4	27	27	27	25.375	244	244	0	16.513	By MS/MS	By MS/MS
MSMEG_2207|MSMEG_2207|beta-ketothiolase|407	MSMEG_2207|MSMEG_2207|beta-ketothiolase|407	8	8	8	MSMEG_2207|MSMEG_2207|beta-ketothiolase|407 AA	1	8	8	8	5	5	4	7	6	4	6	7	6	6	5	5	4	7	6	4	6	7	6	6	5	5	4	7	6	4	6	7	6	6	34.4	34.4	34.4	42.957	407	407	0	24.316	By MS/MS	By MS/MS
MSMEG_2224|MSMEG_2224|acetyl-CoA	MSMEG_2224|MSMEG_2224|acetyl-CoA	5	5	5	MSMEG_2224|MSMEG_2224|acetyl-CoA C-acyltransferase|394 AA	1	5	5	5	2	3	2	5	4	3	3	3	5	3	2	3	2	5	4	3	3	3	5	3	2	3	2	5	4	3	3	3	5	3	25.1	25.1	25.1	41.046	394	394	0	10.597	By MS/MS	By MS/MS
MSMEG_2249|MSMEG_2249|conserved	MSMEG_2249|MSMEG_2249|conserved	8	8	8	MSMEG_2249|MSMEG_2249|conserved hypothetical protein|376 AA	1	8	8	8	4	4	3	6	6	5	6	5	7	5	4	4	3	6	6	5	6	5	7	5	4	4	3	6	6	5	6	5	7	5	42.3	42.3	42.3	41.17	376	376	0	29.307	By MS/MS	By MS/MS
MSMEG_2252|MSMEG_2252|flavin-type	MSMEG_2252|MSMEG_2252|flavin-type	1	1	1	MSMEG_2252|MSMEG_2252|flavin-type hydroxylase|494 AA	1	1	1	1	0	0	1	1	0	0	0	1	1	0	0	0	1	1	0	0	0	1	1	0	0	0	1	1	0	0	0	1	1	0	3.2	3.2	3.2	53.24	494	494	0	4.181
MSMEG_2261|MSMEG_2261|hypothetical	MSMEG_2261|MSMEG_2261|hypothetical	7	7	7	MSMEG_2261|MSMEG_2261|hypothetical protein|189 AA	1	7	7	7	5	7	6	6	6	6	5	7	7	6	5	7	6	6	6	6	5	7	7	6	5	7	6	6	6	6	5	7	7	6	54	54	54	19.386	189	189	0	111.86	By MS/MS	By MS/MS
MSMEG_2263|hybC|hydrogenase-2,	MSMEG_2263|hybC|hydrogenase-2,	8	8	8	MSMEG_2263|hybC|hydrogenase-2, large subunit|535 AA	1	8	8	8	7	5	6	7	5	8	6	7	6	6	7	5	6	7	5	8	6	7	6	6	7	5	6	7	5	8	6	7	6	6	20	20	20	59.617	535	535	0	55.197	By MS/MS	By MS/MS
MSMEG_2271|hypB|hydrogenase	MSMEG_2271|hypB|hydrogenase	3	3	3	MSMEG_2271|hypB|hydrogenase accessory protein HypB|259 AA	1	3	3	3	0	0	0	2	2	0	1	1	2	2	0	0	0	2	2	0	1	1	2	2	0	0	0	2	2	0	1	1	2	2	18.9	18.9	18.9	28.389	259	259	0	10.528
MSMEG_2274|hypC|hydrogenase	MSMEG_2274|hypC|hydrogenase	3	3	3	MSMEG_2274|hypC|hydrogenase assembly chaperone HypC/HupF|86 AA	1	3	3	3	3	3	3	3	2	2	3	3	3	3	3	3	3	3	2	2	3	3	3	3	3	3	3	3	2	2	3	3	3	3	44.2	44.2	44.2	9.2555	86	86	0	33.386	By MS/MS	By MS/MS
MSMEG_2276|hypE|hydrogenase	MSMEG_2276|hypE|hydrogenase	5	5	5	MSMEG_2276|hypE|hydrogenase expression/formation protein HypE|357 AA	1	5	5	5	5	4	5	5	4	5	4	4	4	4	5	4	5	5	4	5	4	4	4	4	5	4	5	5	4	5	4	4	4	4	19.3	19.3	19.3	36.536	357	357	0	27.837	By MS/MS	By MS/MS
MSMEG_2279|MSMEG_2279|3-hydroxyacyl-CoA	MSMEG_2279|MSMEG_2279|3-hydroxyacyl-CoA	2	2	2	MSMEG_2279|MSMEG_2279|3-hydroxyacyl-CoA dehydrogenase type-2|255 AA	1	2	2	2	1	1	0	2	0	1	1	0	1	1	1	1	0	2	0	1	1	0	1	1	1	1	0	2	0	1	1	0	1	1	15.7	15.7	15.7	26.484	255	255	0	11.149	By matching	By matching
MSMEG_2280|MSMEG_2280|pyruvate	MSMEG_2280|MSMEG_2280|pyruvate	13	13	1	MSMEG_2280|MSMEG_2280|pyruvate dehydrogenase|576 AA	1	13	13	1	7	12	7	10	10	9	10	12	11	11	7	12	7	10	10	9	10	12	11	11	0	1	0	1	1	0	1	1	1	1	31.6	31.6	2.3	62.042	576	576	0	86.591	By MS/MS	By MS/MS
MSMEG_2346|MSMEG_2346|phytoene	MSMEG_2346|MSMEG_2346|phytoene	1	1	1	MSMEG_2346|MSMEG_2346|phytoene synthase|315 AA	1	1	1	1	0	0	0	0	0	1	1	0	0	0	0	0	0	0	0	1	1	0	0	0	0	0	0	0	0	1	1	0	0	0	5.7	5.7	5.7	35.25	315	315	0	4.1486
MSMEG_2349|MSMEG_2349|glycosyl	MSMEG_2349|MSMEG_2349|glycosyl	1	1	1	MSMEG_2349|MSMEG_2349|glycosyl hydrolase, family protein 57|514 AA	1	1	1	1	0	0	0	1	0	0	0	1	1	0	0	0	0	1	0	0	0	1	1	0	0	0	0	1	0	0	0	1	1	0	4.1	4.1	4.1	56.846	514	514	0	7.8315
MSMEG_2350|MSMEG_2350|conserved	MSMEG_2350|MSMEG_2350|conserved	5	5	5	MSMEG_2350|MSMEG_2350|conserved hypothetical protein|257 AA	1	5	5	5	5	5	5	5	5	5	5	5	5	5	5	5	5	5	5	5	5	5	5	5	5	5	5	5	5	5	5	5	5	5	31.1	31.1	31.1	28.181	257	257	0	42.949	By MS/MS	By MS/MS
MSMEG_2351|etfB|electron	MSMEG_2351|etfB|electron	17	17	17	MSMEG_2351|etfB|electron transfer flavoprotein, beta subunit|263 AA	1	17	17	17	13	14	15	14	14	14	14	15	16	16	13	14	15	14	14	14	14	15	16	16	13	14	15	14	14	14	14	15	16	16	76.4	76.4	76.4	27.787	263	263	0	286.43	By MS/MS	By MS/MS
MSMEG_2352|etfA|electron	MSMEG_2352|etfA|electron	17	17	17	MSMEG_2352|etfA|electron transfer flavoprotein, alpha subunit|313 AA	1	17	17	17	13	16	17	17	16	15	15	16	17	16	13	16	17	17	16	15	15	16	17	16	13	16	17	17	16	15	15	16	17	16	77.6	77.6	77.6	31.557	313	313	0	314.55	By MS/MS	By MS/MS
MSMEG_2353|MSMEG_2353|secreted	MSMEG_2353|MSMEG_2353|secreted	6	6	6	MSMEG_2353|MSMEG_2353|secreted protein|247 AA	1	6	6	6	3	4	4	6	4	5	5	5	6	6	3	4	4	6	4	5	5	5	6	6	3	4	4	6	4	5	5	5	6	6	31.2	31.2	31.2	25.461	247	247	0	16.015	By MS/MS	By MS/MS
MSMEG_2357|MSMEG_2357|cysteine	MSMEG_2357|MSMEG_2357|cysteine	6	6	6	MSMEG_2357|MSMEG_2357|cysteine desulfurase|402 AA	1	6	6	6	2	4	6	5	5	4	4	6	5	5	2	4	6	5	5	4	4	6	5	5	2	4	6	5	5	4	4	6	5	5	26.6	26.6	26.6	41.32	402	402	0	38.148	By matching	By matching
MSMEG_2358|mnmA|tRNA	MSMEG_2358|mnmA|tRNA	1	1	1	MSMEG_2358|mnmA|tRNA (5-methylaminomethyl-2-thiouridylate)-methyltransferase|356 AA	1	1	1	1	1	1	1	1	1	1	1	1	1	1	1	1	1	1	1	1	1	1	1	1	1	1	1	1	1	1	1	1	1	1	3.7	3.7	3.7	37.66	356	356	0	8.3548	By MS/MS	By MS/MS
MSMEG_2360|MSMEG_2360|4-coumarate:CoA	MSMEG_2360|MSMEG_2360|4-coumarate:CoA	9	9	9	MSMEG_2360|MSMEG_2360|4-coumarate:CoA ligase|524 AA	1	9	9	9	8	7	8	9	9	9	8	9	9	8	8	7	8	9	9	9	8	9	9	8	8	7	8	9	9	9	8	9	9	8	27.3	27.3	27.3	55.365	524	524	0	63.264	By MS/MS	By MS/MS
MSMEG_2361|MSMEG_2361|phosphoribosylglycinamide	MSMEG_2361|MSMEG_2361|phosphoribosylglycinamide	1	1	1	MSMEG_2361|MSMEG_2361|phosphoribosylglycinamide formyltransferase|138 AA	1	1	1	1	1	1	1	1	1	1	1	1	1	1	1	1	1	1	1	1	1	1	1	1	1	1	1	1	1	1	1	1	1	1	8.7	8.7	8.7	15.315	138	138	0.00093023	2.7799	By MS/MS	By matching
MSMEG_2362|ligA|DNA	MSMEG_2362|ligA|DNA	13	13	13	MSMEG_2362|ligA|DNA ligase, NAD-dependent|701 AA	1	13	13	13	11	10	11	12	11	10	11	12	12	11	11	10	11	12	11	10	11	12	12	11	11	10	11	12	11	10	11	12	12	11	25.1	25.1	25.1	76.268	701	701	0	49.445	By MS/MS	By MS/MS
MSMEG_2363|MSMEG_2363|amino	MSMEG_2363|MSMEG_2363|amino	3	3	3	MSMEG_2363|MSMEG_2363|amino acid-binding ACT|219 AA	1	3	3	3	2	1	2	2	1	2	2	2	2	3	2	1	2	2	1	2	2	2	2	3	2	1	2	2	1	2	2	2	2	3	14.6	14.6	14.6	23.037	219	219	0	5.0508	By MS/MS	By matching
MSMEG_2364|gatC|glutamyl-tRNA(Gln)	MSMEG_2364|gatC|glutamyl-tRNA(Gln)	4	4	4	MSMEG_2364|gatC|glutamyl-tRNA(Gln) amidotransferase, C subunit|99 AA	1	4	4	4	2	3	4	4	4	2	3	4	4	3	2	3	4	4	4	2	3	4	4	3	2	3	4	4	4	2	3	4	4	3	79.8	79.8	79.8	10.557	99	99	0	18.022	By MS/MS	By MS/MS
MSMEG_2365|MSMEG_2365|glutamyl-tRNA(Gln)	MSMEG_2365|MSMEG_2365|glutamyl-tRNA(Gln)	13	13	13	MSMEG_2365|MSMEG_2365|glutamyl-tRNA(Gln) amidotransferase subunit A|494 AA	1	13	13	13	11	13	12	12	11	12	13	13	13	13	11	13	12	12	11	12	13	13	13	13	11	13	12	12	11	12	13	13	13	13	47	47	47	51.272	494	494	0	249.56	By MS/MS	By MS/MS
MSMEG_2367|MSMEG_2367|aspartyl/glutamyl-tRNA(Asn/Gln)	MSMEG_2367|MSMEG_2367|aspartyl/glutamyl-tRNA(Asn/Gln)	22	22	22	MSMEG_2367|MSMEG_2367|aspartyl/glutamyl-tRNA(Asn/Gln) amidotransferase subunit B|503 AA	1	22	22	22	19	20	19	19	20	20	20	21	20	21	19	20	19	19	20	20	20	21	20	21	19	20	19	19	20	20	20	21	20	21	68.6	68.6	68.6	54.399	503	503	0	323.31	By MS/MS	By MS/MS
MSMEG_2369|MSMEG_2369|LppZ	MSMEG_2369|MSMEG_2369|LppZ	6	6	6	MSMEG_2369|MSMEG_2369|LppZ protein|364 AA	1	6	6	6	5	6	5	3	4	4	4	5	5	5	5	6	5	3	4	4	4	5	5	5	5	6	5	3	4	4	4	5	5	5	27.7	27.7	27.7	37.713	364	364	0	6.3047	By MS/MS	By MS/MS
MSMEG_2372|ilvB|acetolactate	MSMEG_2372|ilvB|acetolactate	13	13	13	MSMEG_2372|ilvB|acetolactate synthase, large subunit, biosynthetic type|618 AA	1	13	13	13	9	10	9	12	10	9	10	12	13	12	9	10	9	12	10	9	10	12	13	12	9	10	9	12	10	9	10	12	13	12	34.3	34.3	34.3	66.003	618	618	0	85.619	By MS/MS	By MS/MS
MSMEG_2373|ilvN|acetolactate	MSMEG_2373|ilvN|acetolactate	6	6	6	MSMEG_2373|ilvN|acetolactate synthase, small subunit|170 AA	1	6	6	6	4	4	3	5	5	4	4	6	5	6	4	4	3	5	5	4	4	6	5	6	4	4	3	5	5	4	4	6	5	6	50	50	50	18.395	170	170	0	48.857	By MS/MS	By MS/MS
MSMEG_2374|ilvC|ketol-acid	MSMEG_2374|ilvC|ketol-acid	16	16	16	MSMEG_2374|ilvC|ketol-acid reductoisomerase|337 AA	1	16	16	16	10	14	11	12	12	11	11	11	15	11	10	14	11	12	12	11	11	11	15	11	10	14	11	12	12	11	11	11	15	11	58.5	58.5	58.5	36.421	337	337	0	177.82	By MS/MS	By MS/MS
MSMEG_2375|wrbA|NAD(P)H:quinone	MSMEG_2375|wrbA|NAD(P)H:quinone	6	6	6	MSMEG_2375|wrbA|NAD(P)H:quinone oxidoreductase, type IV|203 AA	1	6	6	6	5	5	4	5	4	5	5	6	6	4	5	5	4	5	4	5	5	6	6	4	5	5	4	5	4	5	5	6	6	4	45.8	45.8	45.8	21.52	203	203	0	45.004	By MS/MS	By MS/MS
MSMEG_2376|MSMEG_2376|conserved	MSMEG_2376|MSMEG_2376|conserved	4	4	4	MSMEG_2376|MSMEG_2376|conserved hypothetical protein|153 AA	1	4	4	4	2	3	2	3	2	3	2	4	4	4	2	3	2	3	2	3	2	4	4	4	2	3	2	3	2	3	2	4	4	4	34	34	34	17.551	153	153	0	27.17	By MS/MS	By MS/MS
MSMEG_2377|MSMEG_2377|P49	MSMEG_2377|MSMEG_2377|P49	1	1	1	MSMEG_2377|MSMEG_2377|P49 protein|474 AA	1	1	1	1	0	1	0	0	0	0	0	0	0	0	0	1	0	0	0	0	0	0	0	0	0	1	0	0	0	0	0	0	0	0	2.7	2.7	2.7	49.664	474	474	0.0053908	2.15		By MS/MS
MSMEG_2378|serA|D-3-phosphoglycerate	MSMEG_2378|serA|D-3-phosphoglycerate	16	16	16	MSMEG_2378|serA|D-3-phosphoglycerate dehydrogenase|528 AA	1	16	16	16	10	13	10	12	12	9	11	15	13	14	10	13	10	12	12	9	11	15	13	14	10	13	10	12	12	9	11	15	13	14	53	53	53	54.357	528	528	0	104.45	By MS/MS	By MS/MS
MSMEG_2379|leuB|3-isopropylmalate	MSMEG_2379|leuB|3-isopropylmalate	9	9	9	MSMEG_2379|leuB|3-isopropylmalate dehydrogenase|340 AA	1	9	9	9	6	8	7	8	8	7	7	8	8	9	6	8	7	8	8	7	7	8	8	9	6	8	7	8	8	7	7	8	8	9	56.8	56.8	56.8	35.858	340	340	0	105.5	By MS/MS	By MS/MS
MSMEG_2381|MSMEG_2381|conserved	MSMEG_2381|MSMEG_2381|conserved	11	11	11	MSMEG_2381|MSMEG_2381|conserved hypothetical protein|393 AA	1	11	11	11	9	10	9	11	8	10	10	10	10	10	9	10	9	11	8	10	10	10	10	10	9	10	9	11	8	10	10	10	10	10	55	55	55	41.14	393	393	0	52.815	By MS/MS	By MS/MS
MSMEG_2382|MSMEG_2382|5-carboxymethyl-2-hydroxymuconate	MSMEG_2382|MSMEG_2382|5-carboxymethyl-2-hydroxymuconate	7	7	7	MSMEG_2382|MSMEG_2382|5-carboxymethyl-2-hydroxymuconate delta-isomerase|259 AA	1	7	7	7	5	6	6	6	7	5	6	6	7	7	5	6	6	6	7	5	6	6	7	7	5	6	6	6	7	5	6	6	7	7	40.5	40.5	40.5	27.649	259	259	0	83.479	By MS/MS	By MS/MS
MSMEG_2383|gltX|glutamyl-tRNA	MSMEG_2383|gltX|glutamyl-tRNA	16	16	16	MSMEG_2383|gltX|glutamyl-tRNA synthetase|486 AA	1	16	16	16	11	14	14	15	13	13	12	13	16	14	11	14	14	15	13	13	12	13	16	14	11	14	14	15	13	13	12	13	16	14	47.3	47.3	47.3	54.018	486	486	0	175.94	By MS/MS	By MS/MS
MSMEG_2387|leuC|3-isopropylmalate	MSMEG_2387|leuC|3-isopropylmalate	13	13	13	MSMEG_2387|leuC|3-isopropylmalate dehydratase, large subunit|484 AA	1	13	13	13	12	12	12	13	12	12	13	13	13	13	12	12	12	13	12	12	13	13	13	13	12	12	12	13	12	12	13	13	13	13	37.6	37.6	37.6	51.469	484	484	0	237.24	By MS/MS	By MS/MS
MSMEG_2388|leuD|3-isopropylmalate	MSMEG_2388|leuD|3-isopropylmalate	10	10	10	MSMEG_2388|leuD|3-isopropylmalate dehydratase, small subunit|197 AA	1	10	10	10	8	8	9	9	9	9	9	9	9	10	8	8	9	9	9	9	9	9	9	10	8	8	9	9	9	9	9	9	9	10	73.1	73.1	73.1	21.876	197	197	0	215.32	By MS/MS	By MS/MS
MSMEG_2389|hup|DNA-binding	MSMEG_2389|hup|DNA-binding	6	6	6	MSMEG_2389|hup|DNA-binding protein HU|208 AA	1	6	6	6	5	6	6	5	6	6	6	6	5	6	5	6	6	5	6	6	6	6	5	6	5	6	6	5	6	6	6	6	5	6	25.5	25.5	25.5	21.23	208	208	0	137.03	By MS/MS	By MS/MS
MSMEG_2390|MSMEG_2390|hydrolase,	MSMEG_2390|MSMEG_2390|hydrolase,	3	3	3	MSMEG_2390|MSMEG_2390|hydrolase, NUDIX family protein|322 AA	1	3	3	3	1	1	1	2	1	1	2	1	2	1	1	1	1	2	1	1	2	1	2	1	1	1	1	2	1	1	2	1	2	1	10.6	10.6	10.6	35.922	322	322	0	10.896	By MS/MS	By MS/MS
MSMEG_2391|ppk|polyphosphate	MSMEG_2391|ppk|polyphosphate	15	15	15	MSMEG_2391|ppk|polyphosphate kinase|736 AA	1	15	15	15	10	13	15	13	13	12	14	15	13	13	10	13	15	13	13	12	14	15	13	13	10	13	15	13	13	12	14	15	13	13	28.4	28.4	28.4	82.056	736	736	0	96.885	By MS/MS	By MS/MS
MSMEG_2392|MSMEG_2392|conserved	MSMEG_2392|MSMEG_2392|conserved	2	2	2	MSMEG_2392|MSMEG_2392|conserved hypothetical protein|221 AA	1	2	2	2	2	2	2	0	2	2	1	1	1	2	2	2	2	0	2	2	1	1	1	2	2	2	2	0	2	2	1	1	1	2	13.1	13.1	13.1	22.749	221	221	0	13.675	By matching	By matching
MSMEG_2393|gpsA|NAD-dependent	MSMEG_2393|gpsA|NAD-dependent	8	8	8	MSMEG_2393|gpsA|NAD-dependent glycerol-3-phosphate dehydrogenase|331 AA	1	8	8	8	4	5	5	7	6	6	4	6	6	7	4	5	5	7	6	6	4	6	6	7	4	5	5	7	6	6	4	6	6	7	42.6	42.6	42.6	33.96	331	331	0	89.394	By MS/MS	By MS/MS
MSMEG_2394|MSMEG_2394|putative	MSMEG_2394|MSMEG_2394|putative	8	8	8	MSMEG_2394|MSMEG_2394|putative cystathionine gamma-synthase|369 AA	1	8	8	8	5	6	6	7	4	6	5	6	7	7	5	6	6	7	4	6	5	6	7	7	5	6	6	7	4	6	5	6	7	7	40.1	40.1	40.1	38.959	369	369	0	70.755	By MS/MS	By MS/MS
MSMEG_2395|MSMEG_2395|D-alanine--D-alanine	MSMEG_2395|MSMEG_2395|D-alanine--D-alanine	10	10	10	MSMEG_2395|MSMEG_2395|D-alanine--D-alanine ligase|373 AA	1	10	10	10	10	7	9	10	8	9	9	10	9	10	10	7	9	10	8	9	9	10	9	10	10	7	9	10	8	9	9	10	9	10	36.5	36.5	36.5	39.231	373	373	0	36.524	By MS/MS	By MS/MS
MSMEG_2396|MSMEG_2396|conserved	MSMEG_2396|MSMEG_2396|conserved	1	1	1	MSMEG_2396|MSMEG_2396|conserved hypothetical protein|195 AA	1	1	1	1	1	1	1	0	1	0	1	1	1	0	1	1	1	0	1	0	1	1	1	0	1	1	1	0	1	0	1	1	1	0	10.8	10.8	10.8	20.362	195	195	0	36.67	By MS/MS	By MS/MS
MSMEG_2397|MSMEG_2397|transcriptional	MSMEG_2397|MSMEG_2397|transcriptional	4	4	4	MSMEG_2397|MSMEG_2397|transcriptional regulatory protein, AsnC family protein|78 AA	1	4	4	4	3	4	4	4	3	4	3	4	4	4	3	4	4	4	3	4	3	4	4	4	3	4	4	4	3	4	3	4	4	4	74.4	74.4	74.4	8.1183	78	78	0	29.216	By MS/MS	By MS/MS
MSMEG_2398|thiL|thiamine-monophosphate	MSMEG_2398|thiL|thiamine-monophosphate	3	3	3	MSMEG_2398|thiL|thiamine-monophosphate kinase|337 AA	1	3	3	3	3	0	3	3	2	2	3	2	2	0	3	0	3	3	2	2	3	2	2	0	3	0	3	3	2	2	3	2	2	0	14.5	14.5	14.5	34.208	337	337	0	4.7632	By MS/MS
MSMEG_2399|ung|uracil-DNA	MSMEG_2399|ung|uracil-DNA	6	6	6	MSMEG_2399|ung|uracil-DNA glycosylase|227 AA	1	6	6	6	3	4	3	5	4	4	4	4	4	4	3	4	3	5	4	4	4	4	4	4	3	4	3	5	4	4	4	4	4	4	35.7	35.7	35.7	24.967	227	227	0	17.944	By matching	By matching
MSMEG_2400|rpmB|ribosomal	MSMEG_2400|rpmB|ribosomal	3	3	3	MSMEG_2400|rpmB|ribosomal protein L28|64 AA	1	3	3	3	2	1	2	3	2	2	1	3	3	2	2	1	2	3	2	2	1	3	3	2	2	1	2	3	2	2	1	3	3	2	42.2	42.2	42.2	6.8759	64	64	0	6.5503	By MS/MS	By MS/MS
MSMEG_2407|MSMEG_2407|morphine	MSMEG_2407|MSMEG_2407|morphine	15	15	15	MSMEG_2407|MSMEG_2407|morphine 6-dehydrogenase|283 AA	1	15	15	15	10	15	14	15	15	13	13	15	15	15	10	15	14	15	15	13	13	15	15	15	10	15	14	15	15	13	13	15	15	15	78.8	78.8	78.8	29.949	283	283	0	269.85	By MS/MS	By MS/MS
MSMEG_2408|MSMEG_2408|2,5-diketo-D-gluconic	MSMEG_2408|MSMEG_2408|2,5-diketo-D-gluconic	10	10	10	MSMEG_2408|MSMEG_2408|2,5-diketo-D-gluconic acid reductase A|275 AA	1	10	10	10	4	8	7	8	8	6	8	9	7	8	4	8	7	8	8	6	8	9	7	8	4	8	7	8	8	6	8	9	7	8	62.2	62.2	62.2	30.221	275	275	0	128.27	By MS/MS	By MS/MS
MSMEG_2410|MSMEG_2410|putative	MSMEG_2410|MSMEG_2410|putative	10	10	10	MSMEG_2410|MSMEG_2410|putative serine-threonine protein kinase|242 AA	1	10	10	10	8	8	8	8	9	8	7	8	8	8	8	8	8	8	9	8	7	8	8	8	8	8	8	8	9	8	7	8	8	8	57.4	57.4	57.4	25.57	242	242	0	119.33	By MS/MS	By MS/MS
MSMEG_2412|pyc|pyruvate	MSMEG_2412|pyc|pyruvate	37	37	31	MSMEG_2412|pyc|pyruvate carboxylase|1127 AA	1	37	37	31	26	31	31	36	29	29	27	34	35	34	26	31	31	36	29	29	27	34	35	34	21	25	26	30	23	25	21	28	29	29	53.7	53.7	46.9	120.78	1127	1127	0	323.31	By MS/MS	By MS/MS
MSMEG_2413|MSMEG_2413|putative	MSMEG_2413|MSMEG_2413|putative	1	1	1	MSMEG_2413|MSMEG_2413|putative methyltransferase|169 AA	1	1	1	1	0	1	1	1	1	1	0	1	1	1	0	1	1	1	1	1	0	1	1	1	0	1	1	1	1	1	0	1	1	1	7.7	7.7	7.7	17.628	169	169	0	2.9602		By matching
MSMEG_2414|coaD|pantetheine-phosphate	MSMEG_2414|coaD|pantetheine-phosphate	8	8	8	MSMEG_2414|coaD|pantetheine-phosphate adenylyltransferase|158 AA	1	8	8	8	7	8	7	8	7	7	8	8	8	7	7	8	7	8	7	7	8	8	8	7	7	8	7	8	7	7	8	8	8	7	79.1	79.1	79.1	17.059	158	158	0	187.77	By MS/MS	By MS/MS
MSMEG_2415|MSMEG_2415|hemerythrin	MSMEG_2415|MSMEG_2415|hemerythrin	11	11	11	MSMEG_2415|MSMEG_2415|hemerythrin HHE cation binding region|192 AA	1	11	11	11	7	11	9	9	9	10	9	9	8	8	7	11	9	9	9	10	9	9	8	8	7	11	9	9	9	10	9	9	8	8	65.1	65.1	65.1	21.261	192	192	0	101.42	By MS/MS	By MS/MS
MSMEG_2416|MSMEG_2416|conserved	MSMEG_2416|MSMEG_2416|conserved	10	10	10	MSMEG_2416|MSMEG_2416|conserved hypothetical protein|245 AA	1	10	10	10	8	10	9	8	9	9	9	9	9	10	8	10	9	8	9	9	9	9	9	10	8	10	9	8	9	9	9	9	9	10	52.7	52.7	52.7	26.813	245	245	0	195.96	By MS/MS	By MS/MS
MSMEG_2417|MSMEG_2417|conserved	MSMEG_2417|MSMEG_2417|conserved	2	2	2	MSMEG_2417|MSMEG_2417|conserved hypothetical protein|203 AA	1	2	2	2	1	1	1	2	1	1	1	1	1	1	1	1	1	2	1	1	1	1	1	1	1	1	1	2	1	1	1	1	1	1	10.3	10.3	10.3	21.515	203	203	0	3.3961	By MS/MS	By matching
MSMEG_2418|rnc|ribonuclease	MSMEG_2418|rnc|ribonuclease	5	5	5	MSMEG_2418|rnc|ribonuclease III|230 AA	1	5	5	5	4	4	5	5	4	5	5	5	5	4	4	4	5	5	4	5	5	5	5	4	4	4	5	5	4	5	5	5	5	4	31.3	31.3	31.3	24.205	230	230	0	133.88	By MS/MS	By MS/MS
MSMEG_2421|MSMEG_2421|conserved	MSMEG_2421|MSMEG_2421|conserved	11	11	11	MSMEG_2421|MSMEG_2421|conserved hypothetical protein|139 AA	1	11	11	11	8	11	9	9	10	9	9	10	10	10	8	11	9	9	10	9	9	10	10	10	8	11	9	9	10	9	9	10	10	10	82	82	82	15.154	139	139	0	301.21	By MS/MS	By MS/MS
MSMEG_2422|MSMEG_2422|acylphosphatase|98	MSMEG_2422|MSMEG_2422|acylphosphatase|98	1	1	1	MSMEG_2422|MSMEG_2422|acylphosphatase|98 AA	1	1	1	1	1	0	0	1	0	0	0	0	0	0	1	0	0	1	0	0	0	0	0	0	1	0	0	1	0	0	0	0	0	0	18.4	18.4	18.4	10.756	98	98	0	43.988	By MS/MS
MSMEG_2423|smc|chromosome	MSMEG_2423|smc|chromosome	1	1	1	MSMEG_2423|smc|chromosome segregation protein SMC|1195 AA	1	1	1	1	0	0	0	0	0	0	0	0	1	0	0	0	0	0	0	0	0	0	1	0	0	0	0	0	0	0	0	0	1	0	1.7	1.7	1.7	129.79	1195	1195	0.0031674	2.3015
MSMEG_2424|ftsY|signal	MSMEG_2424|ftsY|signal	6	6	6	MSMEG_2424|ftsY|signal recognition particle-docking protein FtsY|491 AA	1	6	6	6	4	4	3	4	3	4	2	3	5	6	4	4	3	4	3	4	2	3	5	6	4	4	3	4	3	4	2	3	5	6	16.3	16.3	16.3	50.683	491	491	0	11.501	By MS/MS	By MS/MS
MSMEG_2426|MSMEG_2426|nitrogen	MSMEG_2426|MSMEG_2426|nitrogen	7	7	7	MSMEG_2426|MSMEG_2426|nitrogen regulatory protein P-II|112 AA	1	7	7	7	6	7	7	7	7	6	6	7	7	7	6	7	7	7	7	6	6	7	7	7	6	7	7	7	7	6	6	7	7	7	71.4	71.4	71.4	12.116	112	112	0	116.06	By MS/MS	By MS/MS
MSMEG_2430|ffh|signal	MSMEG_2430|ffh|signal	15	15	15	MSMEG_2430|ffh|signal recognition particle protein|522 AA	1	15	15	15	11	15	13	13	12	12	11	13	11	13	11	15	13	13	12	12	11	13	11	13	11	15	13	13	12	12	11	13	11	13	47.7	47.7	47.7	54.765	522	522	0	83.432	By MS/MS	By MS/MS
MSMEG_2431|MSMEG_2431|amidohydrolase	MSMEG_2431|MSMEG_2431|amidohydrolase	2	2	2	MSMEG_2431|MSMEG_2431|amidohydrolase 3|358 AA	1	2	2	2	2	1	2	2	2	2	2	2	2	2	2	1	2	2	2	2	2	2	2	2	2	1	2	2	2	2	2	2	2	2	8.9	8.9	8.9	37.614	358	358	0	7.6048	By matching	By MS/MS
MSMEG_2433|MSMEG_2433|D-alanyl-D-alanine	MSMEG_2433|MSMEG_2433|D-alanyl-D-alanine	6	6	6	MSMEG_2433|MSMEG_2433|D-alanyl-D-alanine carboxypeptidase|296 AA	1	6	6	6	2	3	2	4	4	2	4	3	4	4	2	3	2	4	4	2	4	3	4	4	2	3	2	4	4	2	4	3	4	4	42.9	42.9	42.9	30.974	296	296	0	13.637	By matching	By MS/MS
MSMEG_2434|MSMEG_2434|conserved	MSMEG_2434|MSMEG_2434|conserved	3	3	3	MSMEG_2434|MSMEG_2434|conserved hypothetical protein|144 AA	1	3	3	3	2	2	3	3	3	3	3	3	3	3	2	2	3	3	3	3	3	3	3	3	2	2	3	3	3	3	3	3	3	3	29.2	29.2	29.2	16.525	144	144	0	51.675	By MS/MS	By MS/MS
MSMEG_2435|MSMEG_2435|30S	MSMEG_2435|MSMEG_2435|30S	12	12	12	MSMEG_2435|MSMEG_2435|30S ribosomal protein S16|156 AA	1	12	12	12	8	9	11	10	9	10	9	8	9	9	8	9	11	10	9	10	9	8	9	9	8	9	11	10	9	10	9	8	9	9	76.9	76.9	76.9	16.768	156	156	0	173.05	By MS/MS	By MS/MS
MSMEG_2436|MSMEG_2436|conserved	MSMEG_2436|MSMEG_2436|conserved	7	7	7	MSMEG_2436|MSMEG_2436|conserved hypothetical protein|76 AA	1	7	7	7	6	7	6	5	6	6	6	7	6	7	6	7	6	5	6	6	6	7	6	7	6	7	6	5	6	6	6	7	6	7	75	75	75	8.1952	76	76	0	31.496	By MS/MS	By MS/MS
MSMEG_2437|rimM|16S	MSMEG_2437|rimM|16S	4	4	4	MSMEG_2437|rimM|16S rRNA processing protein RimM|173 AA	1	4	4	4	4	4	4	4	4	4	4	4	4	3	4	4	4	4	4	4	4	4	4	3	4	4	4	4	4	4	4	4	4	3	29.5	29.5	29.5	18.367	173	173	0	17.812	By MS/MS	By MS/MS
MSMEG_2440|rplS|ribosomal	MSMEG_2440|rplS|ribosomal	8	8	8	MSMEG_2440|rplS|ribosomal protein L19|113 AA	1	8	8	8	5	8	7	7	8	7	8	7	7	7	5	8	7	7	8	7	8	7	7	7	5	8	7	7	8	7	8	7	7	7	61.1	61.1	61.1	12.868	113	113	0	128.19	By MS/MS	By MS/MS
MSMEG_2441|lepB|signal	MSMEG_2441|lepB|signal	4	4	4	MSMEG_2441|lepB|signal peptidase I|289 AA	1	4	4	4	2	3	2	2	4	3	4	2	4	3	2	3	2	2	4	3	4	2	4	3	2	3	2	2	4	3	4	2	4	3	19.4	19.4	19.4	31.178	289	289	0	26.776	By MS/MS	By MS/MS
MSMEG_2443|MSMEG_2443|conserved	MSMEG_2443|MSMEG_2443|conserved	1	1	1	MSMEG_2443|MSMEG_2443|conserved hypothetical protein|101 AA	1	1	1	1	0	0	1	1	1	1	1	1	1	1	0	0	1	1	1	1	1	1	1	1	0	0	1	1	1	1	1	1	1	1	11.9	11.9	11.9	12.206	101	101	0	5.3498
MSMEG_2446|MSMEG_2446|conserved	MSMEG_2446|MSMEG_2446|conserved	3	3	3	MSMEG_2446|MSMEG_2446|conserved hypothetical protein|140 AA	1	3	3	3	3	3	3	3	3	3	3	3	3	3	3	3	3	3	3	3	3	3	3	3	3	3	3	3	3	3	3	3	3	3	26.4	26.4	26.4	15.25	140	140	0	24.52	By MS/MS	By MS/MS
MSMEG_2449|mmsA|methylmalonate-semialdehyde	MSMEG_2449|mmsA|methylmalonate-semialdehyde	13	13	13	MSMEG_2449|mmsA|methylmalonate-semialdehyde dehydrogenase|497 AA	1	13	13	13	10	11	11	12	12	13	10	11	13	12	10	11	11	12	12	13	10	11	13	12	10	11	11	12	12	13	10	11	13	12	37	37	37	52.259	497	497	0	118.24	By MS/MS	By MS/MS
MSMEG_2450|MSMEG_2450|adenosylmethionine--8-amino-7-oxononanoate	MSMEG_2450|MSMEG_2450|adenosylmethionine--8-amino-7-oxononanoate	16	16	16	MSMEG_2450|MSMEG_2450|adenosylmethionine--8-amino-7-oxononanoate transaminase|461 AA	1	16	16	16	13	14	11	13	13	13	13	15	15	15	13	14	11	13	13	13	13	15	15	15	13	14	11	13	13	13	13	15	15	15	60.1	60.1	60.1	49.413	461	461	0	285.94	By MS/MS	By MS/MS
MSMEG_2451|MSMEG_2451|HAD-superfamily	MSMEG_2451|MSMEG_2451|HAD-superfamily	7	7	7	MSMEG_2451|MSMEG_2451|HAD-superfamily protein hydrolase, subfamily protein IIA|258 AA	1	7	7	7	6	6	6	6	5	7	6	7	7	7	6	6	6	6	5	7	6	7	7	7	6	6	6	6	5	7	6	7	7	7	40.7	40.7	40.7	27.644	258	258	0	56.295	By MS/MS	By MS/MS
MSMEG_2458|MSMEG_2458|hypothetical	MSMEG_2458|MSMEG_2458|hypothetical	4	4	4	MSMEG_2458|MSMEG_2458|hypothetical protein|326 AA	1	4	4	4	2	3	3	4	4	3	3	3	4	4	2	3	3	4	4	3	3	3	4	4	2	3	3	4	4	3	3	3	4	4	25.5	25.5	25.5	34.324	326	326	0	24.344	By matching	By MS/MS
MSMEG_2465|MSMEG_2465|adenine	MSMEG_2465|MSMEG_2465|adenine	1	1	1	MSMEG_2465|MSMEG_2465|adenine deaminase|406 AA	1	1	1	1	0	1	0	1	0	1	1	0	1	1	0	1	0	1	0	1	1	0	1	1	0	1	0	1	0	1	1	0	1	1	3.9	3.9	3.9	42.243	406	406	0	4.4434		By MS/MS
MSMEG_2467|MSMEG_2467|transketolase,	MSMEG_2467|MSMEG_2467|transketolase,	3	3	3	MSMEG_2467|MSMEG_2467|transketolase, central region|719 AA	1	3	3	3	1	2	2	2	2	2	1	2	2	2	1	2	2	2	2	2	1	2	2	2	1	2	2	2	2	2	1	2	2	2	8.2	8.2	8.2	76.532	719	719	0.0027322	2.4177	By matching	By MS/MS
MSMEG_2468|MSMEG_2468|L-carnitine	MSMEG_2468|MSMEG_2468|L-carnitine	10	10	10	MSMEG_2468|MSMEG_2468|L-carnitine dehydratase/bile acid-inducible protein F|411 AA	1	10	10	10	7	9	8	8	8	7	7	9	9	8	7	9	8	8	8	7	7	9	9	8	7	9	8	8	8	7	7	9	9	8	47	47	47	43.305	411	411	0	158.63	By MS/MS	By MS/MS
MSMEG_2476|MSMEG_2476|MarR	MSMEG_2476|MSMEG_2476|MarR	2	2	2	MSMEG_2476|MSMEG_2476|MarR family protein transcriptional regulatory protein|143 AA	1	2	2	2	2	1	1	2	1	2	2	2	2	2	2	1	1	2	1	2	2	2	2	2	2	1	1	2	1	2	2	2	2	2	19.6	19.6	19.6	15.429	143	143	0	36.71	By MS/MS	By MS/MS
MSMEG_2480|MSMEG_2480|transcriptional	MSMEG_2480|MSMEG_2480|transcriptional	1	1	1	MSMEG_2480|MSMEG_2480|transcriptional regulator, GntR family protein, putative|246 AA	1	1	1	1	0	1	1	0	1	0	1	1	1	0	0	1	1	0	1	0	1	1	1	0	0	1	1	0	1	0	1	1	1	0	6.1	6.1	6.1	27.414	246	246	0	5.0673		By MS/MS
MSMEG_2487|MSMEG_2487|4-aminobutyrate	MSMEG_2487|MSMEG_2487|4-aminobutyrate	5	5	5	MSMEG_2487|MSMEG_2487|4-aminobutyrate aminotransferase|417 AA	1	5	5	5	3	2	2	4	2	4	4	5	3	3	3	2	2	4	2	4	4	5	3	3	3	2	2	4	2	4	4	5	3	3	17.7	17.7	17.7	43.921	417	417	0	12.744	By matching	By matching
MSMEG_2488|MSMEG_2488|[NADP+]	MSMEG_2488|MSMEG_2488|[NADP+]	6	6	6	MSMEG_2488|MSMEG_2488|[NADP+] succinate-semialdehyde dehydrogenase|486 AA	1	6	6	6	4	3	3	6	6	2	2	4	5	4	4	3	3	6	6	2	2	4	5	4	4	3	3	6	6	2	2	4	5	4	25.7	25.7	25.7	51.245	486	486	0	33.535	By MS/MS	By MS/MS
MSMEG_2489|MSMEG_2489|transcriptional	MSMEG_2489|MSMEG_2489|transcriptional	2	2	2	MSMEG_2489|MSMEG_2489|transcriptional regulator, GntR family protein, putative|240 AA	1	2	2	2	2	1	1	1	1	2	0	2	1	2	2	1	1	1	1	2	0	2	1	2	2	1	1	1	1	2	0	2	1	2	14.6	14.6	14.6	26.254	240	240	0	5.9937	By MS/MS	By MS/MS
MSMEG_2497|MSMEG_2497|amidase	MSMEG_2497|MSMEG_2497|amidase	10	10	10	MSMEG_2497|MSMEG_2497|amidase family protein|467 AA	1	10	10	10	7	6	6	7	10	7	9	7	8	8	7	6	6	7	10	7	9	7	8	8	7	6	6	7	10	7	9	7	8	8	33.8	33.8	33.8	49.292	467	467	0	83.96	By MS/MS	By MS/MS
MSMEG_2498|MSMEG_2498|conserved	MSMEG_2498|MSMEG_2498|conserved	2	2	2	MSMEG_2498|MSMEG_2498|conserved hypothetical protein|166 AA	1	2	2	2	2	1	1	1	1	1	2	1	1	1	2	1	1	1	1	1	2	1	1	1	2	1	1	1	1	1	2	1	1	1	16.3	16.3	16.3	17.987	166	166	0	4.981	By MS/MS	By MS/MS
MSMEG_2500|MSMEG_2500|conserved	MSMEG_2500|MSMEG_2500|conserved	5	5	5	MSMEG_2500|MSMEG_2500|conserved hypothetical protein|407 AA	1	5	5	5	1	3	3	5	4	2	1	4	3	2	1	3	3	5	4	2	1	4	3	2	1	3	3	5	4	2	1	4	3	2	14.7	14.7	14.7	43.927	407	407	0	13.283	By MS/MS	By MS/MS
MSMEG_2502|MSMEG_2502|transporter	MSMEG_2502|MSMEG_2502|transporter	2	2	2	MSMEG_2502|MSMEG_2502|transporter ATPase|264 AA	1	2	2	2	0	1	0	1	0	0	0	1	0	0	0	1	0	1	0	0	0	1	0	0	0	1	0	1	0	0	0	1	0	0	13.6	13.6	13.6	28.932	264	264	0.0066845	2.0263		By matching
MSMEG_2506|MSMEG_2506|carboxyvinyl-carboxyphosphonate	MSMEG_2506|MSMEG_2506|carboxyvinyl-carboxyphosphonate	1	1	1	MSMEG_2506|MSMEG_2506|carboxyvinyl-carboxyphosphonate phosphorylmutase|289 AA	1	1	1	1	1	0	0	0	0	1	0	0	0	0	1	0	0	0	0	1	0	0	0	0	1	0	0	0	0	1	0	0	0	0	5.9	5.9	5.9	30.573	289	289	0	6.8979	By MS/MS
MSMEG_2511|MSMEG_2511|siderophore	MSMEG_2511|MSMEG_2511|siderophore	5	5	5	MSMEG_2511|MSMEG_2511|siderophore utilization protein|290 AA	1	5	5	5	3	4	4	4	4	4	4	4	3	4	3	4	4	4	4	4	4	4	3	4	3	4	4	4	4	4	4	4	3	4	21.7	21.7	21.7	31.285	290	290	0	14.343	By MS/MS	By MS/MS
MSMEG_2512|MSMEG_2512|lactate	MSMEG_2512|MSMEG_2512|lactate	4	4	4	MSMEG_2512|MSMEG_2512|lactate 2-monooxygenase|387 AA	1	4	4	4	2	1	1	3	2	1	2	2	3	4	2	1	1	3	2	1	2	2	3	4	2	1	1	3	2	1	2	2	3	4	16.3	16.3	16.3	41.433	387	387	0	7.5951	By MS/MS	By MS/MS
MSMEG_2516|MSMEG_2516|putative	MSMEG_2516|MSMEG_2516|putative	9	9	9	MSMEG_2516|MSMEG_2516|putative oxidoreductase|309 AA	1	9	9	9	5	8	5	5	9	6	8	7	8	9	5	8	5	5	9	6	8	7	8	9	5	8	5	5	9	6	8	7	8	9	42.7	42.7	42.7	32.408	309	309	0	35.761	By MS/MS	By MS/MS
MSMEG_2519|rpsB|ribosomal	MSMEG_2519|rpsB|ribosomal	12	12	12	MSMEG_2519|rpsB|ribosomal protein S2|291 AA	1	12	12	12	11	11	11	11	11	11	11	12	11	12	11	11	11	11	11	11	11	12	11	12	11	11	11	11	11	11	11	12	11	12	58.8	58.8	58.8	31.761	291	291	0	125.69	By MS/MS	By MS/MS
MSMEG_2520|tsf|translation	MSMEG_2520|tsf|translation	20	20	20	MSMEG_2520|tsf|translation elongation factor Ts|275 AA	1	20	20	20	20	19	20	20	19	20	20	19	19	20	20	19	20	20	19	20	20	19	19	20	20	19	20	20	19	20	20	19	19	20	77.8	77.8	77.8	29.405	275	275	0	323.31	By MS/MS	By MS/MS
MSMEG_2521|MSMEG_2521|amidase|486	MSMEG_2521|MSMEG_2521|amidase|486	1	1	1	MSMEG_2521|MSMEG_2521|amidase|486 AA	1	1	1	1	1	1	1	1	1	1	1	1	1	1	1	1	1	1	1	1	1	1	1	1	1	1	1	1	1	1	1	1	1	1	2.7	2.7	2.7	52.776	486	486	0	12.275	By matching	By MS/MS
MSMEG_2528|MSMEG_2528|glycerate	MSMEG_2528|MSMEG_2528|glycerate	13	13	13	MSMEG_2528|MSMEG_2528|glycerate kinase|374 AA	1	13	13	13	11	13	13	13	12	12	11	13	13	13	11	13	13	13	12	12	11	13	13	13	11	13	13	13	12	12	11	13	13	13	50.5	50.5	50.5	37.698	374	374	0	56.859	By MS/MS	By MS/MS
MSMEG_2529|MSMEG_2529|glyoxylate	MSMEG_2529|MSMEG_2529|glyoxylate	5	5	5	MSMEG_2529|MSMEG_2529|glyoxylate reductase|317 AA	1	5	5	5	4	5	4	4	4	4	4	4	4	5	4	5	4	4	4	4	4	4	4	5	4	5	4	4	4	4	4	4	4	5	27.4	27.4	27.4	33.045	317	317	0	10.436	By MS/MS	By MS/MS
MSMEG_2536|MSMEG_2536|3-oxoacyl-[acyl-carrier-protein]	MSMEG_2536|MSMEG_2536|3-oxoacyl-[acyl-carrier-protein]	1	1	1	MSMEG_2536|MSMEG_2536|3-oxoacyl-[acyl-carrier-protein] reductase|251 AA	1	1	1	1	0	1	0	0	0	0	0	1	0	1	0	1	0	0	0	0	0	1	0	1	0	1	0	0	0	0	0	1	0	1	5.6	5.6	5.6	26.852	251	251	0	4.537		By matching
MSMEG_2539|MSMEG_2539|thiopurine	MSMEG_2539|MSMEG_2539|thiopurine	7	7	7	MSMEG_2539|MSMEG_2539|thiopurine S-methyltransferase (tpmt) superfamily protein|226 AA	1	7	7	7	3	6	5	4	4	3	6	6	7	7	3	6	5	4	4	3	6	6	7	7	3	6	5	4	4	3	6	6	7	7	50.9	50.9	50.9	24.183	226	226	0	76.61	By MS/MS	By MS/MS
MSMEG_2540|pyrH|uridylate	MSMEG_2540|pyrH|uridylate	7	7	7	MSMEG_2540|pyrH|uridylate kinase|248 AA	1	7	7	7	4	5	6	7	7	6	4	6	6	7	4	5	6	7	7	6	4	6	6	7	4	5	6	7	7	6	4	6	6	7	44.8	44.8	44.8	26.363	248	248	0	140.18	By MS/MS	By MS/MS
MSMEG_2541|frr|ribosome	MSMEG_2541|frr|ribosome	13	13	13	MSMEG_2541|frr|ribosome recycling factor|185 AA	1	13	13	13	12	12	12	12	12	11	12	11	11	12	12	12	12	12	12	11	12	11	11	12	12	12	12	12	12	11	12	11	11	12	74.6	74.6	74.6	20.824	185	185	0	227.99	By MS/MS	By MS/MS
MSMEG_2546|MSMEG_2546|transcriptional	MSMEG_2546|MSMEG_2546|transcriptional	2	2	2	MSMEG_2546|MSMEG_2546|transcriptional Regulator, GntR family protein|233 AA	1	2	2	2	1	2	1	1	1	1	1	1	2	1	1	2	1	1	1	1	1	1	2	1	1	2	1	1	1	1	1	1	2	1	12.9	12.9	12.9	25.737	233	233	0	20.095	By matching	By matching
MSMEG_2556|MSMEG_2556|beta-glucosidase|749	MSMEG_2556|MSMEG_2556|beta-glucosidase|749	1	1	1	MSMEG_2556|MSMEG_2556|beta-glucosidase|749 AA	1	1	1	1	1	1	1	1	1	1	1	1	1	1	1	1	1	1	1	1	1	1	1	1	1	1	1	1	1	1	1	1	1	1	1.3	1.3	1.3	79.449	749	749	0	4.7703	By MS/MS	By matching
MSMEG_2571|MSMEG_2571|cupin	MSMEG_2571|MSMEG_2571|cupin	4	4	4	MSMEG_2571|MSMEG_2571|cupin 2, conserved barrel|98 AA	1	4	4	4	2	4	0	1	2	2	3	1	1	1	2	4	0	1	2	2	3	1	1	1	2	4	0	1	2	2	3	1	1	1	72.4	72.4	72.4	10.948	98	98	0	7.7563	By MS/MS	By MS/MS
MSMEG_2578|dxr|1-deoxy-D-xylulose	MSMEG_2578|dxr|1-deoxy-D-xylulose	10	10	10	MSMEG_2578|dxr|1-deoxy-D-xylulose 5-phosphate reductoisomerase|398 AA	1	10	10	10	9	8	9	10	9	9	9	10	10	9	9	8	9	10	9	9	9	10	10	9	9	8	9	10	9	9	9	10	10	9	44.5	44.5	44.5	41.064	398	398	0	78.304	By MS/MS	By MS/MS
MSMEG_2580|ispG|4-hydroxy-3-methylbut-2-en-1-yl	MSMEG_2580|ispG|4-hydroxy-3-methylbut-2-en-1-yl	14	14	14	MSMEG_2580|ispG|4-hydroxy-3-methylbut-2-en-1-yl diphosphate synthase|388 AA	1	14	14	14	8	9	11	12	12	10	10	12	10	10	8	9	11	12	12	10	10	12	10	10	8	9	11	12	12	10	10	12	10	10	55.2	55.2	55.2	40.481	388	388	0	69.897	By MS/MS	By MS/MS
MSMEG_2587|map|methionine	MSMEG_2587|map|methionine	4	4	4	MSMEG_2587|map|methionine aminopeptidase, type I|285 AA	1	4	4	4	2	0	2	4	3	2	2	4	4	2	2	0	2	4	3	2	2	4	4	2	2	0	2	4	3	2	2	4	4	2	13.7	13.7	13.7	31.039	285	285	0	7.998	By MS/MS
MSMEG_2593|MSMEG_2593|gnat-family	MSMEG_2593|MSMEG_2593|gnat-family	10	10	10	MSMEG_2593|MSMEG_2593|gnat-family protein acetyltransferase|609 AA	1	10	10	10	10	5	10	10	8	10	8	8	10	9	10	5	10	10	8	10	8	8	10	9	10	5	10	10	8	10	8	8	10	9	20.5	20.5	20.5	65.926	609	609	0	46.118	By MS/MS	By MS/MS
MSMEG_2594|asnB|asparagine	MSMEG_2594|asnB|asparagine	2	2	2	MSMEG_2594|asnB|asparagine synthase (glutamine-hydrolyzing)|601 AA	1	2	2	2	2	2	2	2	2	2	2	2	2	2	2	2	2	2	2	2	2	2	2	2	2	2	2	2	2	2	2	2	2	2	6.5	6.5	6.5	65.293	601	601	0	4.3941	By MS/MS	By MS/MS
MSMEG_2595|MSMEG_2595|gamma-glutamylisopropylamide	MSMEG_2595|MSMEG_2595|gamma-glutamylisopropylamide	4	4	4	MSMEG_2595|MSMEG_2595|gamma-glutamylisopropylamide synthetase|457 AA	1	4	4	4	2	3	0	4	3	3	3	2	3	4	2	3	0	4	3	3	3	2	3	4	2	3	0	4	3	3	3	2	3	4	12.7	12.7	12.7	50.428	457	457	0	18.314	By MS/MS	By MS/MS
MSMEG_2597|MSMEG_2597|aldehyde	MSMEG_2597|MSMEG_2597|aldehyde	6	6	6	MSMEG_2597|MSMEG_2597|aldehyde dehydrogenase|451 AA	1	6	6	6	5	6	6	5	6	6	6	6	5	5	5	6	6	5	6	6	6	6	5	5	5	6	6	5	6	6	6	6	5	5	22.4	22.4	22.4	47.9	451	451	0	33.186	By MS/MS	By MS/MS
MSMEG_2598|MSMEG_2598|short	MSMEG_2598|MSMEG_2598|short	5	5	5	MSMEG_2598|MSMEG_2598|short chain dehydrogenase|257 AA	1	5	5	5	4	5	5	5	5	5	3	5	5	5	4	5	5	5	5	5	3	5	5	5	4	5	5	5	5	5	3	5	5	5	40.5	40.5	40.5	26.859	257	257	0	42.779	By MS/MS	By MS/MS
MSMEG_2604|pcaC|4-carboxymuconolactone	MSMEG_2604|pcaC|4-carboxymuconolactone	1	1	1	MSMEG_2604|pcaC|4-carboxymuconolactone decarboxylase|134 AA	1	1	1	1	1	1	1	1	1	0	1	1	1	1	1	1	1	1	1	0	1	1	1	1	1	1	1	1	1	0	1	1	1	1	12.7	12.7	12.7	14.79	134	134	0	4.0907	By matching	By matching
MSMEG_2611|MSMEG_2611|pyridine	MSMEG_2611|MSMEG_2611|pyridine	19	19	19	MSMEG_2611|MSMEG_2611|pyridine nucleotide-disulphide oxidoreductase family protein|461 AA	1	19	19	19	13	16	16	18	15	11	16	18	18	17	13	16	16	18	15	11	16	18	18	17	13	16	16	18	15	11	16	18	18	17	58.4	58.4	58.4	49.94	461	461	0	258.24	By MS/MS	By MS/MS
MSMEG_2612|MSMEG_2612|conserved	MSMEG_2612|MSMEG_2612|conserved	1	1	1	MSMEG_2612|MSMEG_2612|conserved hypothetical protein|343 AA	1	1	1	1	1	0	1	1	0	0	1	0	1	1	1	0	1	1	0	0	1	0	1	1	1	0	1	1	0	0	1	0	1	1	5.8	5.8	5.8	38.582	343	343	0	5.1681	By matching
MSMEG_2613|mqo|malate:quinone-oxidoreductase|510	MSMEG_2613|mqo|malate:quinone-oxidoreductase|510	8	8	8	MSMEG_2613|mqo|malate:quinone-oxidoreductase|510 AA	1	8	8	8	6	4	7	7	6	6	6	7	8	8	6	4	7	7	6	6	6	7	8	8	6	4	7	7	6	6	6	7	8	8	22.9	22.9	22.9	54.913	510	510	0	94.452	By matching	By matching
MSMEG_2614|MSMEG_2614|ElaA	MSMEG_2614|MSMEG_2614|ElaA	5	5	5	MSMEG_2614|MSMEG_2614|ElaA protein|157 AA	1	5	5	5	2	4	5	4	3	2	3	4	5	5	2	4	5	4	3	2	3	4	5	5	2	4	5	4	3	2	3	4	5	5	47.1	47.1	47.1	17.772	157	157	0	26.561	By MS/MS	By MS/MS
MSMEG_2616|cobO|cob(I)alamin	MSMEG_2616|cobO|cob(I)alamin	2	2	2	MSMEG_2616|cobO|cob(I)alamin adenosyltransferase|197 AA	1	2	2	2	1	1	1	1	1	1	1	1	2	2	1	1	1	1	1	1	1	1	2	2	1	1	1	1	1	1	1	1	2	2	13.2	13.2	13.2	21.891	197	197	0	26.359	By MS/MS	By MS/MS
MSMEG_2618|cobA|uroporphyrin-III	MSMEG_2618|cobA|uroporphyrin-III	4	4	4	MSMEG_2618|cobA|uroporphyrin-III C-methyltransferase|402 AA	1	4	4	4	3	2	3	3	3	1	2	4	3	3	3	2	3	3	3	1	2	4	3	3	3	2	3	3	3	1	2	4	3	3	13.9	13.9	13.9	42.097	402	402	0	8.7422	By MS/MS	By matching
MSMEG_2620|MSMEG_2620|hypothetical	MSMEG_2620|MSMEG_2620|hypothetical	1	1	1	MSMEG_2620|MSMEG_2620|hypothetical protein|234 AA	1	1	1	1	0	1	1	1	1	0	1	1	1	1	0	1	1	1	1	0	1	1	1	1	0	1	1	1	1	0	1	1	1	1	6.4	6.4	6.4	25.051	234	234	0	4.7569		By matching
MSMEG_2621|proS|prolyl-tRNA	MSMEG_2621|proS|prolyl-tRNA	23	23	23	MSMEG_2621|proS|prolyl-tRNA synthetase|585 AA	1	23	23	23	15	19	18	21	21	17	18	18	20	21	15	19	18	21	21	17	18	18	20	21	15	19	18	21	21	17	18	18	20	21	60.3	60.3	60.3	63.843	585	585	0	187.86	By MS/MS	By MS/MS
MSMEG_2622|MSMEG_2622|conserved	MSMEG_2622|MSMEG_2622|conserved	7	7	7	MSMEG_2622|MSMEG_2622|conserved hypothetical alanine rich protein|157 AA	1	7	7	7	7	6	6	7	7	7	7	7	7	7	7	6	6	7	7	7	7	7	7	7	7	6	6	7	7	7	7	7	7	7	59.2	59.2	59.2	16.519	157	157	0	79.37	By MS/MS	By MS/MS
MSMEG_2623|MSMEG_2623|Tat	MSMEG_2623|MSMEG_2623|Tat	3	3	3	MSMEG_2623|MSMEG_2623|Tat (twin-arginine translocation) pathway signal sequence domain protein|182 AA	1	3	3	3	3	3	3	3	3	3	3	3	3	3	3	3	3	3	3	3	3	3	3	3	3	3	3	3	3	3	3	3	3	3	25.3	25.3	25.3	17.804	182	182	0	41.645	By MS/MS	By MS/MS
MSMEG_2624|MSMEG_2624|conserved	MSMEG_2624|MSMEG_2624|conserved	11	11	11	MSMEG_2624|MSMEG_2624|conserved hypothetical protein|181 AA	1	11	11	11	8	10	10	11	10	8	10	10	10	11	8	10	10	11	10	8	10	10	10	11	8	10	10	11	10	8	10	10	10	11	74	74	74	19.344	181	181	0	119.35	By MS/MS	By MS/MS
MSMEG_2625|nusA|transcription	MSMEG_2625|nusA|transcription	5	5	5	MSMEG_2625|nusA|transcription termination factor NusA|343 AA	1	5	5	5	2	2	3	4	3	2	2	4	3	4	2	2	3	4	3	2	2	4	3	4	2	2	3	4	3	2	2	4	3	4	19.5	19.5	19.5	36.729	343	343	0	7.1569	By MS/MS	By MS/MS
MSMEG_2628|infB|translation	MSMEG_2628|infB|translation	13	13	13	MSMEG_2628|infB|translation initiation factor IF-2|610 AA	1	13	13	13	9	10	10	10	8	10	9	12	9	12	9	10	10	10	8	10	9	12	9	12	9	10	10	10	8	10	9	12	9	12	34.8	34.8	34.8	65.926	610	610	0	231.15	By MS/MS	By MS/MS
MSMEG_2629|rbfA|ribosome-binding	MSMEG_2629|rbfA|ribosome-binding	5	5	5	MSMEG_2629|rbfA|ribosome-binding factor A|156 AA	1	5	5	5	4	5	5	4	5	5	5	5	5	5	4	5	5	4	5	5	5	5	5	5	4	5	5	4	5	5	5	5	5	5	48.7	48.7	48.7	16.594	156	156	0	35.392	By MS/MS	By MS/MS
MSMEG_2630|MSMEG_2630|DHH	MSMEG_2630|MSMEG_2630|DHH	4	4	4	MSMEG_2630|MSMEG_2630|DHH family protein|340 AA	1	4	4	4	3	2	2	4	3	2	2	3	3	3	3	2	2	4	3	2	2	3	3	3	3	2	2	4	3	2	2	3	3	3	18.8	18.8	18.8	35.536	340	340	0.0013831	2.6881	By MS/MS	By matching
MSMEG_2634|MSMEG_2634|conserved	MSMEG_2634|MSMEG_2634|conserved	1	1	1	MSMEG_2634|MSMEG_2634|conserved hypothetical protein|347 AA	1	1	1	1	1	1	0	1	1	1	1	0	1	1	1	1	0	1	1	1	1	0	1	1	1	1	0	1	1	1	1	0	1	1	5.2	5.2	5.2	36.076	347	347	0	7.7048	By MS/MS	By MS/MS
MSMEG_2641|MSMEG_2641|enoyl-CoA	MSMEG_2641|MSMEG_2641|enoyl-CoA	10	10	10	MSMEG_2641|MSMEG_2641|enoyl-CoA hydratase|252 AA	1	10	10	10	5	8	6	9	7	6	7	9	8	9	5	8	6	9	7	6	7	9	8	9	5	8	6	9	7	6	7	9	8	9	55.6	55.6	55.6	26.978	252	252	0	168.64	By MS/MS	By MS/MS
MSMEG_2642|MSMEG_2642|conserved	MSMEG_2642|MSMEG_2642|conserved	2	2	2	MSMEG_2642|MSMEG_2642|conserved hypothetical protein|91 AA	1	2	2	2	1	2	1	2	2	1	1	1	1	1	1	2	1	2	2	1	1	1	1	1	1	2	1	2	2	1	1	1	1	1	26.4	26.4	26.4	9.8993	91	91	0.0066815	2.0245	By MS/MS	By matching
MSMEG_2647|MSMEG_2647|metallophosphoesterase|321	MSMEG_2647|MSMEG_2647|metallophosphoesterase|321	1	1	1	MSMEG_2647|MSMEG_2647|metallophosphoesterase|321 AA	1	1	1	1	0	0	0	1	1	0	0	0	1	0	0	0	0	1	1	0	0	0	1	0	0	0	0	1	1	0	0	0	1	0	5.6	5.6	5.6	37.44	321	321	0	11.172
MSMEG_2648|MSMEG_2648|Sfp-type	MSMEG_2648|MSMEG_2648|Sfp-type	4	4	4	MSMEG_2648|MSMEG_2648|Sfp-type phosphopantetheinyl transferase|221 AA	1	4	4	4	2	2	1	4	2	2	3	2	2	3	2	2	1	4	2	2	3	2	2	3	2	2	1	4	2	2	3	2	2	3	31.7	31.7	31.7	23.949	221	221	0	21.606	By MS/MS	By MS/MS
MSMEG_2649|truB|tRNA	MSMEG_2649|truB|tRNA	6	6	6	MSMEG_2649|truB|tRNA pseudouridine synthase B|303 AA	1	6	6	6	6	5	5	5	5	5	6	6	4	5	6	5	5	5	5	5	6	6	4	5	6	5	5	5	5	5	6	6	4	5	23.1	23.1	23.1	32.43	303	303	0	21.188	By MS/MS	By MS/MS
MSMEG_2652|MSMEG_2652|iron	MSMEG_2652|MSMEG_2652|iron	5	5	5	MSMEG_2652|MSMEG_2652|iron repressor protein|236 AA	1	5	5	5	4	3	3	4	3	4	3	3	3	3	4	3	3	4	3	4	3	3	3	3	4	3	3	4	3	4	3	3	3	3	25	25	25	25.624	236	236	0	23.938	By MS/MS	By MS/MS
MSMEG_2654|rpsO|ribosomal	MSMEG_2654|rpsO|ribosomal	7	7	7	MSMEG_2654|rpsO|ribosomal protein S15|89 AA	1	7	7	7	4	7	5	6	6	6	6	7	7	7	4	7	5	6	6	6	6	7	7	7	4	7	5	6	6	6	6	7	7	7	60.7	60.7	60.7	10.344	89	89	0	52.182	By MS/MS	By MS/MS
MSMEG_2656|gpsI|guanosine	MSMEG_2656|gpsI|guanosine	39	39	39	MSMEG_2656|gpsI|guanosine pentaphosphate synthetase I/polyribonucleotide nucleotidyltransferase|763 AA	1	39	39	39	30	36	34	36	35	34	34	38	36	35	30	36	34	36	35	34	34	38	36	35	30	36	34	36	35	34	34	38	36	35	64	64	64	81.026	763	763	0	323.31	By MS/MS	By MS/MS
MSMEG_2657|MSMEG_2657|peptidase,	MSMEG_2657|MSMEG_2657|peptidase,	2	2	2	MSMEG_2657|MSMEG_2657|peptidase, M16 family protein|434 AA	1	2	2	2	0	1	1	2	0	1	1	2	1	0	0	1	1	2	0	1	1	2	1	0	0	1	1	2	0	1	1	2	1	0	8.1	8.1	8.1	47.494	434	434	0	4.5152		By MS/MS
MSMEG_2658|MSMEG_2658|beta-lactamase|293	MSMEG_2658|MSMEG_2658|beta-lactamase|293	16	16	16	MSMEG_2658|MSMEG_2658|beta-lactamase|293 AA	1	16	16	16	11	13	14	13	14	13	14	14	16	15	11	13	14	13	14	13	14	14	16	15	11	13	14	13	14	13	14	14	16	15	71	71	71	31.095	293	293	0	214.49	By MS/MS	By MS/MS
MSMEG_2659|ald|alanine	MSMEG_2659|ald|alanine	4	4	4	MSMEG_2659|ald|alanine dehydrogenase|371 AA	1	4	4	4	1	3	3	3	4	3	2	3	3	4	1	3	3	3	4	3	2	3	3	4	1	3	3	3	4	3	2	3	3	4	15.9	15.9	15.9	38.955	371	371	0	7.5763	By matching	By MS/MS
MSMEG_2661|MSMEG_2661|domain	MSMEG_2661|MSMEG_2661|domain	3	3	3	MSMEG_2661|MSMEG_2661|domain of unknown function (306) family protein|253 AA	1	3	3	3	3	2	3	2	2	3	2	1	3	1	3	2	3	2	2	3	2	1	3	1	3	2	3	2	2	3	2	1	3	1	16.2	16.2	16.2	26.639	253	253	0	22.6	By MS/MS	By MS/MS
MSMEG_2664|dapB|dihydrodipicolinate	MSMEG_2664|dapB|dihydrodipicolinate	10	10	10	MSMEG_2664|dapB|dihydrodipicolinate reductase|245 AA	1	10	10	10	5	8	8	9	7	7	6	8	10	9	5	8	8	9	7	7	6	8	10	9	5	8	8	9	7	7	6	8	10	9	59.2	59.2	59.2	25.71	245	245	0	37.155	By MS/MS	By MS/MS
MSMEG_2666|MSMEG_2666|multimeric	MSMEG_2666|MSMEG_2666|multimeric	2	2	2	MSMEG_2666|MSMEG_2666|multimeric flavodoxin WrbA|151 AA	1	2	2	2	2	2	2	2	2	2	2	1	2	2	2	2	2	2	2	2	2	1	2	2	2	2	2	2	2	2	2	1	2	2	17.9	17.9	17.9	15.848	151	151	0	3.612	By matching	By MS/MS
MSMEG_2667|MSMEG_2667|HpcH/HpaI	MSMEG_2667|MSMEG_2667|HpcH/HpaI	2	2	2	MSMEG_2667|MSMEG_2667|HpcH/HpaI aldolase/citrate lyase family protein, putative|306 AA	1	2	2	2	1	0	0	0	0	0	1	0	0	1	1	0	0	0	0	0	1	0	0	1	1	0	0	0	0	0	1	0	0	1	7.8	7.8	7.8	33.266	306	306	0	3.6924	By MS/MS
MSMEG_2669|MSMEG_2669|hydrolase|249	MSMEG_2669|MSMEG_2669|hydrolase|249	7	7	7	MSMEG_2669|MSMEG_2669|hydrolase|249 AA	1	7	7	7	7	7	5	6	7	7	7	6	6	7	7	7	5	6	7	7	7	6	6	7	7	7	5	6	7	7	7	6	6	7	40.6	40.6	40.6	26.668	249	249	0	121.57	By MS/MS	By MS/MS
MSMEG_2670|thyA|thymidylate	MSMEG_2670|thyA|thymidylate	4	4	4	MSMEG_2670|thyA|thymidylate synthase|266 AA	1	4	4	4	3	4	3	4	3	3	4	4	4	4	3	4	3	4	3	3	4	4	4	4	3	4	3	4	3	3	4	4	4	4	20.7	20.7	20.7	30.056	266	266	0	17.949	By MS/MS	By MS/MS
MSMEG_2682|MSMEG_2682|transcriptional	MSMEG_2682|MSMEG_2682|transcriptional	1	1	1	MSMEG_2682|MSMEG_2682|transcriptional regulator|265 AA	1	1	1	1	0	0	0	1	0	0	0	0	0	0	0	0	0	1	0	0	0	0	0	0	0	0	0	1	0	0	0	0	0	0	5.7	5.7	5.7	28.42	265	265	0	3.46
MSMEG_2684|dapA|dihydrodipicolinate	MSMEG_2684|dapA|dihydrodipicolinate	10	10	10	MSMEG_2684|dapA|dihydrodipicolinate synthase|300 AA	1	10	10	10	10	10	9	10	10	9	10	9	9	10	10	10	9	10	10	9	10	9	9	10	10	10	9	10	10	9	10	9	9	10	42.7	42.7	42.7	30.883	300	300	0	166.62	By MS/MS	By MS/MS
MSMEG_2685|MSMEG_2685|metallo-beta-lactamase	MSMEG_2685|MSMEG_2685|metallo-beta-lactamase	13	13	13	MSMEG_2685|MSMEG_2685|metallo-beta-lactamase superfamily protein|558 AA	1	13	13	13	9	8	9	13	11	8	12	12	11	12	9	8	9	13	11	8	12	12	11	12	9	8	9	13	11	8	12	12	11	12	36.6	36.6	36.6	59.617	558	558	0	152.05	By MS/MS	By MS/MS
MSMEG_2687|MSMEG_2687|carveol	MSMEG_2687|MSMEG_2687|carveol	5	4	4	MSMEG_2687|MSMEG_2687|carveol dehydrogenase|275 AA	1	5	4	4	4	4	3	4	5	4	4	4	4	4	3	3	2	3	4	3	3	3	3	3	3	3	2	3	4	3	3	3	3	3	23.3	20	20	28.311	275	275	0	10.893	By MS/MS	By MS/MS
MSMEG_2688|MSMEG_2688|antibiotic	MSMEG_2688|MSMEG_2688|antibiotic	3	3	3	MSMEG_2688|MSMEG_2688|antibiotic biosynthesis monooxygenase domain protein|104 AA	1	3	3	3	2	3	2	2	2	2	2	3	3	3	2	3	2	2	2	2	2	3	3	3	2	3	2	2	2	2	2	3	3	3	45.2	45.2	45.2	10.814	104	104	0	5.9734	By MS/MS	By MS/MS
MSMEG_2690|MSMEG_2690|DNA	MSMEG_2690|MSMEG_2690|DNA	1	1	1	MSMEG_2690|MSMEG_2690|DNA translocase FtsK|926 AA	1	1	1	1	0	0	0	1	0	0	0	0	0	0	0	0	0	1	0	0	0	0	0	0	0	0	0	1	0	0	0	0	0	0	1.4	1.4	1.4	99.228	926	926	0	4.6635
MSMEG_2695|35kd_ag|35	MSMEG_2695|35kd_ag|35	17	17	17	MSMEG_2695|35kd_ag|35 kDa protein|279 AA	1	17	17	17	15	16	15	15	15	15	15	16	16	16	15	16	15	15	15	15	15	16	16	16	15	16	15	15	15	15	15	16	16	16	83.5	83.5	83.5	30.338	279	279	0	249.72	By MS/MS	By MS/MS
MSMEG_2698|MSMEG_2698|conserved	MSMEG_2698|MSMEG_2698|conserved	4	4	4	MSMEG_2698|MSMEG_2698|conserved hypothetical protein|136 AA	1	4	4	4	2	1	2	3	3	2	2	2	4	4	2	1	2	3	3	2	2	2	4	4	2	1	2	3	3	2	2	2	4	4	31.6	31.6	31.6	15.415	136	136	0	9.0878	By matching	By matching
MSMEG_2700|MSMEG_2700|conserved	MSMEG_2700|MSMEG_2700|conserved	4	4	4	MSMEG_2700|MSMEG_2700|conserved hypothetical protein|64 AA	1	4	4	4	4	4	4	4	4	4	4	4	4	4	4	4	4	4	4	4	4	4	4	4	4	4	4	4	4	4	4	4	4	4	82.8	82.8	82.8	7.252	64	64	0	35.597	By MS/MS	By MS/MS
MSMEG_2723|recA|protein	MSMEG_2723|recA|protein	15	15	15	MSMEG_2723|recA|protein RecA|349 AA	1	15	15	15	7	15	9	12	10	9	10	14	14	14	7	15	9	12	10	9	10	14	14	14	7	15	9	12	10	9	10	14	14	14	53.9	53.9	53.9	37.3	349	349	0	115.61	By MS/MS	By MS/MS
MSMEG_2724|MSMEG_2724|regulatory	MSMEG_2724|MSMEG_2724|regulatory	2	2	2	MSMEG_2724|MSMEG_2724|regulatory protein RecX|188 AA	1	2	2	2	0	2	0	1	1	2	2	2	1	2	0	2	0	1	1	2	2	2	1	2	0	2	0	1	1	2	2	2	1	2	9	9	9	21.463	188	188	0.0013743	2.5696		By MS/MS
MSMEG_2727|MSMEG_2727|glutamate	MSMEG_2727|MSMEG_2727|glutamate	15	15	15	MSMEG_2727|MSMEG_2727|glutamate binding protein|273 AA	1	15	15	15	15	15	15	15	15	15	15	15	15	15	15	15	15	15	15	15	15	15	15	15	15	15	15	15	15	15	15	15	15	15	73.6	73.6	73.6	29.036	273	273	0	323.31	By MS/MS	By MS/MS
MSMEG_2728|MSMEG_2728|glutamate	MSMEG_2728|MSMEG_2728|glutamate	5	5	5	MSMEG_2728|MSMEG_2728|glutamate transport ATP-binding protein GluA|261 AA	1	5	5	5	5	4	3	3	3	3	4	4	4	4	5	4	3	3	3	3	4	4	4	4	5	4	3	3	3	3	4	4	4	4	32.2	32.2	32.2	28.269	261	261	0	19.842	By MS/MS	By MS/MS
MSMEG_2729|miaB|tRNA-I(6)A37	MSMEG_2729|miaB|tRNA-I(6)A37	4	4	4	MSMEG_2729|miaB|tRNA-I(6)A37 thiotransferase enzyme MiaB|512 AA	1	4	4	4	1	3	1	3	2	2	2	3	2	3	1	3	1	3	2	2	2	3	2	3	1	3	1	3	2	2	2	3	2	3	10.7	10.7	10.7	55.516	512	512	0	5.3729	By matching	By matching
MSMEG_2731|MSMEG_2731|ATPase	MSMEG_2731|MSMEG_2731|ATPase	18	18	18	MSMEG_2731|MSMEG_2731|ATPase involved in DNA repair|454 AA	1	18	18	18	17	16	18	18	17	18	18	18	17	16	17	16	18	18	17	18	18	18	17	16	17	16	18	18	17	18	18	18	17	16	49.3	49.3	49.3	49.735	454	454	0	323.31	By MS/MS	By MS/MS
MSMEG_2733|MSMEG_2733|conserved	MSMEG_2733|MSMEG_2733|conserved	3	3	3	MSMEG_2733|MSMEG_2733|conserved hypothetical protein|228 AA	1	3	3	3	2	2	1	1	1	1	1	2	2	1	2	2	1	1	1	1	1	2	2	1	2	2	1	1	1	1	1	2	2	1	18	18	18	22.641	228	228	0	8.8989	By MS/MS	By MS/MS
MSMEG_2735|dapF|diaminopimelate	MSMEG_2735|dapF|diaminopimelate	3	3	3	MSMEG_2735|dapF|diaminopimelate epimerase|291 AA	1	3	3	3	1	2	2	2	1	2	1	2	2	2	1	2	2	2	1	2	1	2	2	2	1	2	2	2	1	2	1	2	2	2	24.4	24.4	24.4	29.791	291	291	0	6.1961	By matching	By MS/MS
MSMEG_2736|MSMEG_2736|GTP-binding	MSMEG_2736|MSMEG_2736|GTP-binding	1	1	1	MSMEG_2736|MSMEG_2736|GTP-binding protein|470 AA	1	1	1	1	0	1	1	0	1	0	1	1	1	1	0	1	1	0	1	0	1	1	1	1	0	1	1	0	1	0	1	1	1	1	3.6	3.6	3.6	50.572	470	470	0	23.397		By MS/MS
MSMEG_2738|MSMEG_2738|biotin	MSMEG_2738|MSMEG_2738|biotin	7	7	7	MSMEG_2738|MSMEG_2738|biotin sulfoxide reductase|763 AA	1	7	7	7	2	3	3	6	3	3	4	6	6	6	2	3	3	6	3	3	4	6	6	6	2	3	3	6	3	3	4	6	6	6	11.3	11.3	11.3	83.302	763	763	0	17.483	By MS/MS	By matching
MSMEG_2739|MSMEG_2739|conserved	MSMEG_2739|MSMEG_2739|conserved	14	14	14	MSMEG_2739|MSMEG_2739|conserved hypothetical protein|811 AA	1	14	14	14	10	12	11	13	12	11	13	12	13	13	10	12	11	13	12	11	13	12	13	13	10	12	11	13	12	11	13	12	13	13	31.4	31.4	31.4	86.19	811	811	0	133.48	By MS/MS	By MS/MS
MSMEG_2740|lexA|LexA	MSMEG_2740|lexA|LexA	10	10	10	MSMEG_2740|lexA|LexA repressor|243 AA	1	10	10	10	7	8	7	7	8	8	7	9	7	8	7	8	7	7	8	8	7	9	7	8	7	8	7	7	8	8	7	9	7	8	69.5	69.5	69.5	25.778	243	243	0	143.05	By MS/MS	By MS/MS
MSMEG_2743|nrdR|transcriptional	MSMEG_2743|nrdR|transcriptional	1	1	1	MSMEG_2743|nrdR|transcriptional regulator, NrdR family protein|150 AA	1	1	1	1	1	1	1	1	1	1	1	1	1	1	1	1	1	1	1	1	1	1	1	1	1	1	1	1	1	1	1	1	1	1	8.7	8.7	8.7	16.822	150	150	0	5.4747	By MS/MS	By MS/MS
MSMEG_2744|MSMEG_2744|thymidylate	MSMEG_2744|MSMEG_2744|thymidylate	5	5	5	MSMEG_2744|MSMEG_2744|thymidylate synthase|229 AA	1	5	5	5	4	5	5	5	5	5	5	5	5	5	4	5	5	5	5	5	5	5	5	5	4	5	5	5	5	5	5	5	5	5	30.6	30.6	30.6	25.206	229	229	0	44.948	By MS/MS	By MS/MS
MSMEG_2746|MSMEG_2746|conserved	MSMEG_2746|MSMEG_2746|conserved	8	8	8	MSMEG_2746|MSMEG_2746|conserved hypothetical alanine and leucine rich protein|348 AA	1	8	8	8	6	7	6	7	8	6	7	8	6	8	6	7	6	7	8	6	7	8	6	8	6	7	6	7	8	6	7	8	6	8	41.4	41.4	41.4	38.286	348	348	0	152.02	By MS/MS	By MS/MS
MSMEG_2750|MSMEG_2750|iron-dependent	MSMEG_2750|MSMEG_2750|iron-dependent	12	12	12	MSMEG_2750|MSMEG_2750|iron-dependent repressor IdeR|230 AA	1	12	12	12	9	11	11	11	11	10	11	12	10	11	9	11	11	11	11	10	11	12	10	11	9	11	11	11	11	10	11	12	10	11	72.2	72.2	72.2	25.416	230	230	0	218.24	By MS/MS	By MS/MS
MSMEG_2752|MSMEG_2752|sigma	MSMEG_2752|MSMEG_2752|sigma	8	8	8	MSMEG_2752|MSMEG_2752|sigma factor SigB|319 AA	1	8	8	8	4	7	5	5	6	7	8	8	6	6	4	7	5	5	6	7	8	8	6	6	4	7	5	5	6	7	8	8	6	6	28.2	28.2	28.2	36.069	319	319	0	55.22	By MS/MS	By MS/MS
MSMEG_2754|MSMEG_2754|conserved	MSMEG_2754|MSMEG_2754|conserved	2	2	2	MSMEG_2754|MSMEG_2754|conserved hypothetical protein|78 AA	1	2	2	2	2	2	2	2	2	2	2	2	2	2	2	2	2	2	2	2	2	2	2	2	2	2	2	2	2	2	2	2	2	2	51.3	51.3	51.3	8.6898	78	78	0	14.38	By MS/MS	By MS/MS
MSMEG_2756|MSMEG_2756|conserved	MSMEG_2756|MSMEG_2756|conserved	4	4	4	MSMEG_2756|MSMEG_2756|conserved hypothetical protein|63 AA	1	4	4	4	2	3	3	3	3	3	3	3	3	3	2	3	3	3	3	3	3	3	3	3	2	3	3	3	3	3	3	3	3	3	52.4	52.4	52.4	6.7987	63	63	0	19.469	By MS/MS	By MS/MS
MSMEG_2758|MSMEG_2758|sigma	MSMEG_2758|MSMEG_2758|sigma	15	15	15	MSMEG_2758|MSMEG_2758|sigma factor MysA|466 AA	1	15	15	15	14	14	15	15	14	14	15	14	14	14	14	14	15	15	14	14	15	14	14	14	14	14	15	15	14	14	15	14	14	14	30.3	30.3	30.3	51.503	466	466	0	260.3	By MS/MS	By MS/MS
MSMEG_2760|MSMEG_2760|polyphosphate	MSMEG_2760|MSMEG_2760|polyphosphate	6	6	6	MSMEG_2760|MSMEG_2760|polyphosphate glucokinase|272 AA	1	6	6	6	5	5	4	4	4	5	6	4	6	5	5	5	4	4	4	5	6	4	6	5	5	5	4	4	4	5	6	4	6	5	34.6	34.6	34.6	28.13	272	272	0	120.24	By MS/MS	By MS/MS
MSMEG_2761|MSMEG_2761|putative	MSMEG_2761|MSMEG_2761|putative	2	2	2	MSMEG_2761|MSMEG_2761|putative secreted alanine rich protein|216 AA	1	2	2	2	2	2	2	2	1	2	1	1	2	1	2	2	2	2	1	2	1	1	2	1	2	2	2	2	1	2	1	1	2	1	17.6	17.6	17.6	22.852	216	216	0	97.12	By MS/MS	By MS/MS
MSMEG_2762|MSMEG_2762|inositol-1-monophosphatase|283	MSMEG_2762|MSMEG_2762|inositol-1-monophosphatase|283	4	4	4	MSMEG_2762|MSMEG_2762|inositol-1-monophosphatase|283 AA	1	4	4	4	4	3	4	4	4	4	4	3	4	4	4	3	4	4	4	4	4	3	4	4	4	3	4	4	4	4	4	3	4	4	22.6	22.6	22.6	29.227	283	283	0	78.899	By MS/MS	By MS/MS
MSMEG_2763|MSMEG_2763|conserved	MSMEG_2763|MSMEG_2763|conserved	7	7	7	MSMEG_2763|MSMEG_2763|conserved hypothetical protein|100 AA	1	7	7	7	6	6	6	6	7	7	6	7	7	7	6	6	6	6	7	7	6	7	7	7	6	6	6	6	7	7	6	7	7	7	80	80	80	10.954	100	100	0	249.87	By MS/MS	By MS/MS
MSMEG_2765|MSMEG_2765|deoxyuridine	MSMEG_2765|MSMEG_2765|deoxyuridine	6	6	6	MSMEG_2765|MSMEG_2765|deoxyuridine 5-triphosphate nucleotidohydrolase|154 AA	1	6	6	6	5	6	6	6	6	5	6	6	6	6	5	6	6	6	6	5	6	6	6	6	5	6	6	6	6	5	6	6	6	6	61	61	61	15.935	154	154	0	171.8	By MS/MS	By MS/MS
MSMEG_2766|MSMEG_2766|conserved	MSMEG_2766|MSMEG_2766|conserved	9	9	9	MSMEG_2766|MSMEG_2766|conserved hypothetical protein|264 AA	1	9	9	9	9	9	8	9	9	9	8	8	8	9	9	9	8	9	9	9	8	8	8	9	9	9	8	9	9	9	8	8	8	9	58.7	58.7	58.7	27.67	264	264	0	66.238	By MS/MS	By MS/MS
MSMEG_2768|MSMEG_2768|OB-fold	MSMEG_2768|MSMEG_2768|OB-fold	3	3	3	MSMEG_2768|MSMEG_2768|OB-fold nucleic acid binding domain protein|123 AA	1	3	3	3	3	1	3	3	2	3	3	3	2	3	3	1	3	3	2	3	3	3	2	3	3	1	3	3	2	3	3	3	2	3	29.3	29.3	29.3	13.697	123	123	0	17.51	By MS/MS	By matching
MSMEG_2769|MSMEG_2769|TrkB	MSMEG_2769|MSMEG_2769|TrkB	6	6	6	MSMEG_2769|MSMEG_2769|TrkB protein|222 AA	1	6	6	6	3	4	4	5	5	5	4	5	6	5	3	4	4	5	5	5	4	5	6	5	3	4	4	5	5	5	4	5	6	5	36	36	36	24.412	222	222	0	45.881	By matching	By MS/MS
MSMEG_2771|MSMEG_2771|TrkA	MSMEG_2771|MSMEG_2771|TrkA	5	5	5	MSMEG_2771|MSMEG_2771|TrkA protein|224 AA	1	5	5	5	3	4	4	4	4	4	4	5	5	5	3	4	4	4	4	4	4	5	5	5	3	4	4	4	4	4	4	5	5	5	28.1	28.1	28.1	23.945	224	224	0	68.099	By MS/MS	By MS/MS
MSMEG_2773|MSMEG_2773|putative	MSMEG_2773|MSMEG_2773|putative	9	9	9	MSMEG_2773|MSMEG_2773|putative RNA methyltransferase|397 AA	1	9	9	9	4	5	5	8	6	7	6	7	9	6	4	5	5	8	6	7	6	7	9	6	4	5	5	8	6	7	6	7	9	6	31.5	31.5	31.5	42.534	397	397	0	61.116	By MS/MS	By MS/MS
MSMEG_2776|dxs|1-deoxy-D-xylulose-5-phosphate	MSMEG_2776|dxs|1-deoxy-D-xylulose-5-phosphate	3	3	3	MSMEG_2776|dxs|1-deoxy-D-xylulose-5-phosphate synthase|638 AA	1	3	3	3	0	0	1	2	3	2	1	2	2	3	0	0	1	2	3	2	1	2	2	3	0	0	1	2	3	2	1	2	2	3	4.7	4.7	4.7	68.034	638	638	0	4.0004
MSMEG_2778|MSMEG_2778|ribonuclease	MSMEG_2778|MSMEG_2778|ribonuclease	4	4	4	MSMEG_2778|MSMEG_2778|ribonuclease D|415 AA	1	4	4	4	3	4	2	3	3	3	2	2	2	2	3	4	2	3	3	3	2	2	2	2	3	4	2	3	3	3	2	2	2	2	12.3	12.3	12.3	45.263	415	415	0	4.8902	By MS/MS	By MS/MS
MSMEG_2779|MSMEG_2779|conserved	MSMEG_2779|MSMEG_2779|conserved	1	1	1	MSMEG_2779|MSMEG_2779|conserved hypothetical protein|193 AA	1	1	1	1	1	1	1	1	1	1	1	1	1	1	1	1	1	1	1	1	1	1	1	1	1	1	1	1	1	1	1	1	1	1	6.7	6.7	6.7	20.601	193	193	0	3.5437	By matching	By MS/MS
MSMEG_2780|hemE|uroporphyrinogen	MSMEG_2780|hemE|uroporphyrinogen	8	8	8	MSMEG_2780|hemE|uroporphyrinogen decarboxylase|353 AA	1	8	8	8	6	8	8	8	8	7	6	7	8	8	6	8	8	8	8	7	6	7	8	8	6	8	8	8	8	7	6	7	8	8	41.1	41.1	41.1	37.41	353	353	0	63.119	By MS/MS	By MS/MS
MSMEG_2782|MSMEG_2782|conserved	MSMEG_2782|MSMEG_2782|conserved	10	10	10	MSMEG_2782|MSMEG_2782|conserved hypothetical protein|231 AA	1	10	10	10	6	10	6	7	7	6	6	9	6	9	6	10	6	7	7	6	6	9	6	9	6	10	6	7	7	6	6	9	6	9	56.7	56.7	56.7	26.304	231	231	0	54.16	By MS/MS	By MS/MS
MSMEG_2784|msrB|methionine-R-sulfoxide	MSMEG_2784|msrB|methionine-R-sulfoxide	7	7	7	MSMEG_2784|msrB|methionine-R-sulfoxide reductase|137 AA	1	7	7	7	6	7	5	5	6	5	7	7	7	7	6	7	5	5	6	5	7	7	7	7	6	7	5	5	6	5	7	7	7	7	44.5	44.5	44.5	15.458	137	137	0	29.136	By MS/MS	By MS/MS
MSMEG_2786|MSMEG_2786|hydrolase,	MSMEG_2786|MSMEG_2786|hydrolase,	7	7	7	MSMEG_2786|MSMEG_2786|hydrolase, alpha/beta fold family protein|529 AA	1	7	7	7	3	3	5	5	6	4	4	4	5	7	3	3	5	5	6	4	4	4	5	7	3	3	5	5	6	4	4	4	5	7	27	27	27	54.607	529	529	0	35.466	By MS/MS	By MS/MS
MSMEG_2787|MSMEG_2787|putative	MSMEG_2787|MSMEG_2787|putative	7	7	7	MSMEG_2787|MSMEG_2787|putative riboflavin biosynthesis protein RibD|260 AA	1	7	7	7	4	4	4	5	4	4	5	4	4	4	4	4	4	5	4	4	5	4	4	4	4	4	4	5	4	4	5	4	4	4	33.5	33.5	33.5	27.927	260	260	0	15.431	By MS/MS	By MS/MS
MSMEG_2788|MSMEG_2788|ATP/GTP-binding	MSMEG_2788|MSMEG_2788|ATP/GTP-binding	3	3	3	MSMEG_2788|MSMEG_2788|ATP/GTP-binding integral membrane protein|345 AA	1	3	3	3	2	2	2	3	2	3	2	3	2	3	2	2	2	3	2	3	2	3	2	3	2	2	2	3	2	3	2	3	2	3	8.7	8.7	8.7	37.149	345	345	0	4.3126	By MS/MS	By matching
MSMEG_2789|MSMEG_2789|acetyltransferase,	MSMEG_2789|MSMEG_2789|acetyltransferase,	3	3	3	MSMEG_2789|MSMEG_2789|acetyltransferase, GNAT family protein|176 AA	1	3	3	3	2	3	1	3	3	3	3	3	3	3	2	3	1	3	3	3	3	3	3	3	2	3	1	3	3	3	3	3	3	3	21.6	21.6	21.6	19.036	176	176	0	15.006	By MS/MS	By MS/MS
MSMEG_2792|MSMEG_2792|Clp	MSMEG_2792|MSMEG_2792|Clp	3	3	3	MSMEG_2792|MSMEG_2792|Clp amino terminal domain protein|244 AA	1	3	3	3	0	2	0	1	0	1	1	0	1	0	0	2	0	1	0	1	1	0	1	0	0	2	0	1	0	1	1	0	1	0	15.2	15.2	15.2	26.242	244	244	0	5.7717		By MS/MS
MSMEG_2794|MSMEG_2794|transcriptional	MSMEG_2794|MSMEG_2794|transcriptional	1	1	1	MSMEG_2794|MSMEG_2794|transcriptional regulator, GntR family protein|220 AA	1	1	1	1	1	0	1	1	0	0	1	0	0	1	1	0	1	1	0	0	1	0	0	1	1	0	1	1	0	0	1	0	0	1	8.2	8.2	8.2	23.535	220	220	0.0004686	2.8919	By MS/MS
MSMEG_2799|MSMEG_2799|phospho-2-dehydro-3-deoxyheptonate	MSMEG_2799|MSMEG_2799|phospho-2-dehydro-3-deoxyheptonate	2	2	2	MSMEG_2799|MSMEG_2799|phospho-2-dehydro-3-deoxyheptonate aldolase|350 AA	1	2	2	2	1	2	1	2	2	1	2	2	2	2	1	2	1	2	2	1	2	2	2	2	1	2	1	2	2	1	2	2	2	2	9.1	9.1	9.1	37.351	350	350	0	25.458	By MS/MS	By matching
MSMEG_2800|MSMEG_2800|NADPH-dependent	MSMEG_2800|MSMEG_2800|NADPH-dependent	5	5	5	MSMEG_2800|MSMEG_2800|NADPH-dependent fmn reductase|160 AA	1	5	5	5	2	3	3	4	4	3	4	4	4	4	2	3	3	4	4	3	4	4	4	4	2	3	3	4	4	3	4	4	4	4	38.8	38.8	38.8	16.862	160	160	0	11.486	By MS/MS	By MS/MS
MSMEG_2809|MSMEG_2809|conserved	MSMEG_2809|MSMEG_2809|conserved	2	2	2	MSMEG_2809|MSMEG_2809|conserved hypothetical protein|148 AA	1	2	2	2	0	0	0	2	1	0	1	1	1	1	0	0	0	2	1	0	1	1	1	1	0	0	0	2	1	0	1	1	1	1	25	25	25	16.309	148	148	0.0075022	1.9157
MSMEG_2820|MSMEG_2820|hypothetical	MSMEG_2820|MSMEG_2820|hypothetical	2	2	2	MSMEG_2820|MSMEG_2820|hypothetical protein|389 AA	1	2	2	2	2	1	1	2	2	1	2	2	1	2	2	1	1	2	2	1	2	2	1	2	2	1	1	2	2	1	2	2	1	2	6.9	6.9	6.9	41.078	389	389	0	6.2685	By MS/MS	By matching
MSMEG_2826|MSMEG_2826|hypothetical	MSMEG_2826|MSMEG_2826|hypothetical	6	6	6	MSMEG_2826|MSMEG_2826|hypothetical protein|407 AA	1	6	6	6	2	2	2	4	3	3	3	6	4	4	2	2	2	4	3	3	3	6	4	4	2	2	2	4	3	3	3	6	4	4	20.4	20.4	20.4	46.85	407	407	0	9.9159	By matching	By MS/MS
MSMEG_2839|MSMEG_2839|transcriptional	MSMEG_2839|MSMEG_2839|transcriptional	23	23	23	MSMEG_2839|MSMEG_2839|transcriptional accessory protein|796 AA	1	23	23	23	20	22	20	21	21	20	19	21	22	20	20	22	20	21	21	20	19	21	22	20	20	22	20	21	21	20	19	21	22	20	40.3	40.3	40.3	85.418	796	796	0	172.64	By MS/MS	By MS/MS
MSMEG_2850|MSMEG_2850|mycobacterial	MSMEG_2850|MSMEG_2850|mycobacterial	6	6	6	MSMEG_2850|MSMEG_2850|mycobacterial family protein 11 protein|140 AA	1	6	6	6	4	5	5	5	5	5	6	5	6	5	4	5	5	5	5	5	6	5	6	5	4	5	5	5	5	5	6	5	6	5	49.3	49.3	49.3	15.442	140	140	0	54.539	By MS/MS	By MS/MS
MSMEG_2868|MSMEG_2868|transcriptional	MSMEG_2868|MSMEG_2868|transcriptional	2	2	2	MSMEG_2868|MSMEG_2868|transcriptional regulator, PadR family protein|231 AA	1	2	2	2	1	2	1	2	1	1	2	1	2	2	1	2	1	2	1	1	2	1	2	2	1	2	1	2	1	1	2	1	2	2	16.9	16.9	16.9	26.147	231	231	0	56.744	By MS/MS	By MS/MS
MSMEG_2881|MSMEG_2881|aldehyde	MSMEG_2881|MSMEG_2881|aldehyde	3	3	3	MSMEG_2881|MSMEG_2881|aldehyde dehydrogenase|473 AA	1	3	3	3	1	1	0	2	2	1	1	3	1	1	1	1	0	2	2	1	1	3	1	1	1	1	0	2	2	1	1	3	1	1	9.5	9.5	9.5	50.132	473	473	0	38.011	By matching	By matching
MSMEG_2897|MSMEG_2897|conserved	MSMEG_2897|MSMEG_2897|conserved	2	2	2	MSMEG_2897|MSMEG_2897|conserved hypothetical protein|106 AA	1	2	2	2	2	2	2	2	2	2	2	2	2	2	2	2	2	2	2	2	2	2	2	2	2	2	2	2	2	2	2	2	2	2	22.6	22.6	22.6	11.199	106	106	0	3.5556	By MS/MS	By matching
MSMEG_2900|MSMEG_2900|2-hydroxy-6-oxo-6-phenylhexa-2,4-dienoate	MSMEG_2900|MSMEG_2900|2-hydroxy-6-oxo-6-phenylhexa-2,4-dienoate	10	10	10	MSMEG_2900|MSMEG_2900|2-hydroxy-6-oxo-6-phenylhexa-2,4-dienoate hydrolase|286 AA	1	10	10	10	8	6	7	9	8	6	9	9	10	9	8	6	7	9	8	6	9	9	10	9	8	6	7	9	8	6	9	9	10	9	43	43	43	31.665	286	286	0	56.079	By MS/MS	By MS/MS
MSMEG_2902|MSMEG_2902|hydrolase,	MSMEG_2902|MSMEG_2902|hydrolase,	2	2	2	MSMEG_2902|MSMEG_2902|hydrolase, putative|247 AA	1	2	2	2	2	2	2	2	1	1	2	1	1	0	2	2	2	2	1	1	2	1	1	0	2	2	2	2	1	1	2	1	1	0	12.1	12.1	12.1	25.452	247	247	0	12.731	By MS/MS	By matching
MSMEG_2913|MSMEG_2913|hydrolase|287	MSMEG_2913|MSMEG_2913|hydrolase|287	4	4	4	MSMEG_2913|MSMEG_2913|hydrolase|287 AA	1	4	4	4	1	3	0	3	1	3	1	1	4	2	1	3	0	3	1	3	1	1	4	2	1	3	0	3	1	3	1	1	4	2	24	24	24	32.234	287	287	0	29.305	By MS/MS	By MS/MS
MSMEG_2924|MSMEG_2924|permease	MSMEG_2924|MSMEG_2924|permease	2	2	2	MSMEG_2924|MSMEG_2924|permease binding-protein component|317 AA	1	2	2	2	1	1	1	2	1	1	1	0	0	1	1	1	1	2	1	1	1	0	0	1	1	1	1	2	1	1	1	0	0	1	8.5	8.5	8.5	34.068	317	317	0	4.8599	By matching	By MS/MS
MSMEG_2926|MSMEG_2926|glycine	MSMEG_2926|MSMEG_2926|glycine	5	5	5	MSMEG_2926|MSMEG_2926|glycine betaine/carnitine/choline transport ATP-binding protein opuCA|394 AA	1	5	5	5	2	5	3	4	4	5	5	3	2	3	2	5	3	4	4	5	5	3	2	3	2	5	3	4	4	5	5	3	2	3	19.8	19.8	19.8	43.397	394	394	0	34.686	By MS/MS	By MS/MS
MSMEG_2929|MSMEG_2929|thioesterase	MSMEG_2929|MSMEG_2929|thioesterase	2	2	2	MSMEG_2929|MSMEG_2929|thioesterase family protein|209 AA	1	2	2	2	1	1	1	1	2	0	2	1	2	1	1	1	1	1	2	0	2	1	2	1	1	1	1	1	2	0	2	1	2	1	17.7	17.7	17.7	22.631	209	209	0	4.8413	By MS/MS	By matching
MSMEG_2931|thrS|threonyl-tRNA	MSMEG_2931|thrS|threonyl-tRNA	18	18	18	MSMEG_2931|thrS|threonyl-tRNA synthetase|684 AA	1	18	18	18	14	15	13	18	15	15	16	16	17	15	14	15	13	18	15	15	16	16	17	15	14	15	13	18	15	15	16	16	17	15	38.6	38.6	38.6	77.01	684	684	0	156.32	By MS/MS	By MS/MS
MSMEG_2932|MSMEG_2932|HIT	MSMEG_2932|MSMEG_2932|HIT	2	2	2	MSMEG_2932|MSMEG_2932|HIT family protein hydrolase|205 AA	1	2	2	2	1	1	1	2	2	2	2	2	2	2	1	1	1	2	2	2	2	2	2	2	1	1	1	2	2	2	2	2	2	2	17.6	17.6	17.6	22.524	205	205	0	29.549	By MS/MS	By MS/MS
MSMEG_2937|MSMEG_2937|pyridoxine	MSMEG_2937|MSMEG_2937|pyridoxine	13	13	13	MSMEG_2937|MSMEG_2937|pyridoxine biosynthesis protein|303 AA	1	13	13	13	10	11	11	12	10	10	11	11	11	11	10	11	11	12	10	10	11	11	11	11	10	11	11	12	10	10	11	11	11	11	64.7	64.7	64.7	32.102	303	303	0	156.69	By MS/MS	By MS/MS
MSMEG_2938|tesB|acyl-CoA	MSMEG_2938|tesB|acyl-CoA	5	5	5	MSMEG_2938|tesB|acyl-CoA thioesterase II|283 AA	1	5	5	5	1	2	1	4	3	2	4	3	5	3	1	2	1	4	3	2	4	3	5	3	1	2	1	4	3	2	4	3	5	3	26.9	26.9	26.9	31.78	283	283	0	110.65	By matching	By MS/MS
MSMEG_2939|MSMEG_2939|glutamine	MSMEG_2939|MSMEG_2939|glutamine	3	3	3	MSMEG_2939|MSMEG_2939|glutamine amidotransferase subunit PdxT|193 AA	1	3	3	3	1	2	1	1	1	1	2	2	1	1	1	2	1	1	1	1	2	2	1	1	1	2	1	1	1	1	2	2	1	1	22.3	22.3	22.3	20.725	193	193	0	5.6132	By matching	By MS/MS
MSMEG_2940|MSMEG_2940|conserved	MSMEG_2940|MSMEG_2940|conserved	7	7	7	MSMEG_2940|MSMEG_2940|conserved hypothetical protein|251 AA	1	7	7	7	6	7	7	7	7	6	6	7	7	7	6	7	7	7	7	6	6	7	7	7	6	7	7	7	7	6	6	7	7	7	57	57	57	26.765	251	251	0	130.78	By MS/MS	By MS/MS
MSMEG_2941|MSMEG_2941|NAD	MSMEG_2941|MSMEG_2941|NAD	10	10	10	MSMEG_2941|MSMEG_2941|NAD dependent epimerase/dehydratase family protein|216 AA	1	10	10	10	10	10	10	10	10	10	10	10	10	10	10	10	10	10	10	10	10	10	10	10	10	10	10	10	10	10	10	10	10	10	63	63	63	22.193	216	216	0	95.806	By MS/MS	By MS/MS
MSMEG_2942|MSMEG_2942|glyoxalase/bleomycin	MSMEG_2942|MSMEG_2942|glyoxalase/bleomycin	2	2	2	MSMEG_2942|MSMEG_2942|glyoxalase/bleomycin resistance protein/dioxygenase superfamily protein|143 AA	1	2	2	2	2	2	2	2	2	2	2	2	2	2	2	2	2	2	2	2	2	2	2	2	2	2	2	2	2	2	2	2	2	2	14	14	14	15.95	143	143	0	4.5096	By MS/MS	By matching
MSMEG_2944|ruvA|holliday	MSMEG_2944|ruvA|holliday	4	4	4	MSMEG_2944|ruvA|holliday junction DNA helicase RuvA|195 AA	1	4	4	4	1	4	3	2	3	3	3	3	3	3	1	4	3	2	3	3	3	3	3	3	1	4	3	2	3	3	3	3	3	3	28.7	28.7	28.7	20.019	195	195	0	9.6755	By MS/MS	By MS/MS
MSMEG_2945|ruvB|holliday	MSMEG_2945|ruvB|holliday	3	3	3	MSMEG_2945|ruvB|holliday junction DNA helicase RuvB|351 AA	1	3	3	3	3	3	3	2	2	3	3	2	2	2	3	3	3	2	2	3	3	2	2	2	3	3	3	2	2	3	3	2	2	2	12.8	12.8	12.8	37.497	351	351	0	4.9899	By MS/MS	By MS/MS
MSMEG_2947|MSMEG_2947|polyketide	MSMEG_2947|MSMEG_2947|polyketide	1	1	1	MSMEG_2947|MSMEG_2947|polyketide cyclase|262 AA	1	1	1	1	0	0	0	1	1	0	1	0	1	1	0	0	0	1	1	0	1	0	1	1	0	0	0	1	1	0	1	0	1	1	5.7	5.7	5.7	29.444	262	262	0	3.8363
MSMEG_2951|MSMEG_2951|[2Fe-2S]	MSMEG_2951|MSMEG_2951|[2Fe-2S]	1	1	1	MSMEG_2951|MSMEG_2951|[2Fe-2S] binding domain protein|161 AA	1	1	1	1	0	0	0	0	0	0	1	0	0	0	0	0	0	0	0	0	1	0	0	0	0	0	0	0	0	0	1	0	0	0	8.7	8.7	8.7	17.099	161	161	0.0027285	2.3757
MSMEG_2953|MSMEG_2953|ethyl	MSMEG_2953|MSMEG_2953|ethyl	3	3	3	MSMEG_2953|MSMEG_2953|ethyl tert-butyl ether degradation EthD|106 AA	1	3	3	3	1	3	2	1	3	2	3	3	2	3	1	3	2	1	3	2	3	3	2	3	1	3	2	1	3	2	3	3	2	3	48.1	48.1	48.1	11.672	106	106	0	16.36	By MS/MS	By MS/MS
MSMEG_2956|MSMEG_2956|NAD	MSMEG_2956|MSMEG_2956|NAD	2	2	2	MSMEG_2956|MSMEG_2956|NAD dependent epimerase/dehydratase family protein|1168 AA	1	2	2	2	1	0	2	2	2	1	2	1	2	2	1	0	2	2	2	1	2	1	2	2	1	0	2	2	2	1	2	1	2	2	1.8	1.8	1.8	127.95	1168	1168	0.0018282	2.4801	By matching
MSMEG_2959|gabT|4-aminobutyrate	MSMEG_2959|gabT|4-aminobutyrate	7	7	6	MSMEG_2959|gabT|4-aminobutyrate transaminase|446 AA	1	7	7	6	6	4	7	6	7	7	6	7	7	7	6	4	7	6	7	7	6	7	7	7	5	3	6	5	6	6	5	6	6	6	21.1	21.1	17.9	46.925	446	446	0	73.031	By MS/MS	By MS/MS
MSMEG_2960|yajC|preprotein	MSMEG_2960|yajC|preprotein	3	3	3	MSMEG_2960|yajC|preprotein translocase, YajC subunit|107 AA	1	3	3	3	2	2	3	3	3	2	1	2	3	3	2	2	3	3	3	2	1	2	3	3	2	2	3	3	3	2	1	2	3	3	48.6	48.6	48.6	11.9	107	107	0	29.127	By MS/MS	By MS/MS
MSMEG_2961|secD|protein-export	MSMEG_2961|secD|protein-export	4	4	4	MSMEG_2961|secD|protein-export membrane protein SecD|620 AA	1	4	4	4	3	2	2	2	2	1	1	2	3	3	3	2	2	2	2	1	1	2	3	3	3	2	2	2	2	1	1	2	3	3	13.5	13.5	13.5	63.646	620	620	0	28.853	By MS/MS	By MS/MS
MSMEG_2962|MSMEG_2962|protein-export	MSMEG_2962|MSMEG_2962|protein-export	2	2	2	MSMEG_2962|MSMEG_2962|protein-export membrane protein SecF|422 AA	1	2	2	2	0	0	0	2	1	0	0	0	1	1	0	0	0	2	1	0	0	0	1	1	0	0	0	2	1	0	0	0	1	1	9.5	9.5	9.5	45.007	422	422	0	5.1136
MSMEG_2963|MSMEG_2963|bacterial	MSMEG_2963|MSMEG_2963|bacterial	2	2	2	MSMEG_2963|MSMEG_2963|bacterial extracellular solute-binding protein, family protein 5|555 AA	1	2	2	2	2	2	2	2	2	2	2	2	2	2	2	2	2	2	2	2	2	2	2	2	2	2	2	2	2	2	2	2	2	2	5.4	5.4	5.4	58.2	555	555	0	76.065	By MS/MS	By MS/MS
MSMEG_2964|MSMEG_2964|adenine	MSMEG_2964|MSMEG_2964|adenine	5	5	5	MSMEG_2964|MSMEG_2964|adenine phosphoribosyltransferase|180 AA	1	5	5	5	3	2	4	5	4	4	3	4	4	4	3	2	4	5	4	4	3	4	4	4	3	2	4	5	4	4	3	4	4	4	37.8	37.8	37.8	18.385	180	180	0	12.117	By MS/MS	By MS/MS
MSMEG_2974|MSMEG_2974|peptidyl-prolyl	MSMEG_2974|MSMEG_2974|peptidyl-prolyl	7	7	7	MSMEG_2974|MSMEG_2974|peptidyl-prolyl cis-trans isomerase, cyclophilin-type|287 AA	1	7	7	7	4	6	6	7	5	6	5	6	6	7	4	6	6	7	5	6	5	6	6	7	4	6	6	7	5	6	5	6	6	7	42.5	42.5	42.5	29.656	287	287	0	93.323	By MS/MS	By MS/MS
MSMEG_2976|hisS|histidyl-tRNA	MSMEG_2976|hisS|histidyl-tRNA	11	11	11	MSMEG_2976|hisS|histidyl-tRNA synthetase|426 AA	1	11	11	11	10	10	9	9	10	9	11	7	8	8	10	10	9	9	10	9	11	7	8	8	10	10	9	9	10	9	11	7	8	8	34.5	34.5	34.5	45.663	426	426	0	63.142	By MS/MS	By MS/MS
MSMEG_2982|MSMEG_2982|putative	MSMEG_2982|MSMEG_2982|putative	7	7	7	MSMEG_2982|MSMEG_2982|putative periplasmic binding protein|422 AA	1	7	7	7	1	1	3	5	3	0	4	5	5	6	1	1	3	5	3	0	4	5	5	6	1	1	3	5	3	0	4	5	5	6	31.3	31.3	31.3	45.299	422	422	0	176.58	By MS/MS	By matching
MSMEG_2983|MSMEG_2983|conserved	MSMEG_2983|MSMEG_2983|conserved	4	4	4	MSMEG_2983|MSMEG_2983|conserved hypothetical protein|143 AA	1	4	4	4	3	4	4	4	3	4	3	3	4	4	3	4	4	4	3	4	3	3	4	4	3	4	4	4	3	4	3	3	4	4	67.8	67.8	67.8	15.382	143	143	0	54.897	By MS/MS	By MS/MS
MSMEG_2988|MSMEG_2988|carbon-nitrogen	MSMEG_2988|MSMEG_2988|carbon-nitrogen	3	3	3	MSMEG_2988|MSMEG_2988|carbon-nitrogen hydrolase family protein|299 AA	1	3	3	3	2	1	1	3	3	3	2	2	2	2	2	1	1	3	3	3	2	2	2	2	2	1	1	3	3	3	2	2	2	2	18.1	18.1	18.1	32.876	299	299	0	18.784	By MS/MS	By MS/MS
MSMEG_2998|MSMEG_2998|conserved	MSMEG_2998|MSMEG_2998|conserved	1	1	1	MSMEG_2998|MSMEG_2998|conserved hypothetical protein|178 AA	1	1	1	1	1	1	1	1	1	1	1	1	1	1	1	1	1	1	1	1	1	1	1	1	1	1	1	1	1	1	1	1	1	1	6.7	6.7	6.7	20.089	178	178	0.0031703	2.3171	By matching	By matching
MSMEG_2999|MSMEG_2999|conserved	MSMEG_2999|MSMEG_2999|conserved	8	8	8	MSMEG_2999|MSMEG_2999|conserved protein|541 AA	1	8	8	8	5	4	5	7	6	5	6	4	8	6	5	4	5	7	6	5	6	4	8	6	5	4	5	7	6	5	6	4	8	6	23.8	23.8	23.8	59.974	541	541	0	43.156	By MS/MS	By MS/MS
MSMEG_3000|MSMEG_3000|metallopeptidase,	MSMEG_3000|MSMEG_3000|metallopeptidase,	8	8	8	MSMEG_3000|MSMEG_3000|metallopeptidase, zinc binding|297 AA	1	8	8	8	7	7	8	8	8	7	7	8	8	8	7	7	8	8	8	7	7	8	8	8	7	7	8	8	8	7	7	8	8	8	48.5	48.5	48.5	31.421	297	297	0	84.37	By MS/MS	By MS/MS
MSMEG_3003|aspS|aspartyl-tRNA	MSMEG_3003|aspS|aspartyl-tRNA	4	4	4	MSMEG_3003|aspS|aspartyl-tRNA synthetase|598 AA	1	4	4	4	3	3	3	3	4	3	4	3	4	4	3	3	3	3	4	3	4	3	4	4	3	3	3	3	4	3	4	3	4	4	9.7	9.7	9.7	65.169	598	598	0	28.521	By MS/MS	By MS/MS
MSMEG_3004|MSMEG_3004|conserved	MSMEG_3004|MSMEG_3004|conserved	8	8	8	MSMEG_3004|MSMEG_3004|conserved hypothetical protein TIGR00026|151 AA	1	8	8	8	7	8	8	8	8	8	8	8	8	8	7	8	8	8	8	8	8	8	8	8	7	8	8	8	8	8	8	8	8	8	76.2	76.2	76.2	16.489	151	151	0	140.25	By MS/MS	By MS/MS
MSMEG_3013|MSMEG_3013|putative	MSMEG_3013|MSMEG_3013|putative	1	1	1	MSMEG_3013|MSMEG_3013|putative transcriptional regulator family protein|156 AA	1	1	1	1	1	0	1	1	1	1	1	1	1	1	1	0	1	1	1	1	1	1	1	1	1	0	1	1	1	1	1	1	1	1	7.7	7.7	7.7	17.461	156	156	0.001387	2.7161	By matching
MSMEG_3014|MSMEG_3014|conserved	MSMEG_3014|MSMEG_3014|conserved	2	2	2	MSMEG_3014|MSMEG_3014|conserved hypothetical protein|126 AA	1	2	2	2	0	0	1	2	1	1	0	1	1	1	0	0	1	2	1	1	0	1	1	1	0	0	1	2	1	1	0	1	1	1	33.3	33.3	33.3	13.997	126	126	0	4.1058
MSMEG_3019|MSMEG_3019|conserved	MSMEG_3019|MSMEG_3019|conserved	12	12	12	MSMEG_3019|MSMEG_3019|conserved hypothetical protein|342 AA	1	12	12	12	9	11	9	10	9	9	10	9	11	10	9	11	9	10	9	9	10	9	11	10	9	11	9	10	9	9	10	9	11	10	48.5	48.5	48.5	38.239	342	342	0	160.65	By MS/MS	By MS/MS
MSMEG_3020|MSMEG_3020|conserved	MSMEG_3020|MSMEG_3020|conserved	1	1	1	MSMEG_3020|MSMEG_3020|conserved hypothetical protein|277 AA	1	1	1	1	1	1	1	1	1	1	1	1	1	1	1	1	1	1	1	1	1	1	1	1	1	1	1	1	1	1	1	1	1	1	4.3	4.3	4.3	30.403	277	277	0	3.306	By matching	By matching
MSMEG_3021|MSMEG_3021|AAA	MSMEG_3021|MSMEG_3021|AAA	2	2	2	MSMEG_3021|MSMEG_3021|AAA ATPase, central region|447 AA	1	2	2	2	1	0	0	0	0	0	1	0	0	2	1	0	0	0	0	0	1	0	0	2	1	0	0	0	0	0	1	0	0	2	10.1	10.1	10.1	47.331	447	447	0	4.0153	By MS/MS
MSMEG_3024|MSMEG_3024|conserved	MSMEG_3024|MSMEG_3024|conserved	1	1	1	MSMEG_3024|MSMEG_3024|conserved hypothetical protein|129 AA	1	1	1	1	0	0	0	1	1	1	0	0	0	1	0	0	0	1	1	1	0	0	0	1	0	0	0	1	1	1	0	0	0	1	7	7	7	14.071	129	129	0.0058218	2.0941
MSMEG_3025|alaS|alanyl-tRNA	MSMEG_3025|alaS|alanyl-tRNA	22	22	22	MSMEG_3025|alaS|alanyl-tRNA synthetase|896 AA	1	22	22	22	13	14	16	19	14	15	12	21	15	18	13	14	16	19	14	15	12	21	15	18	13	14	16	19	14	15	12	21	15	18	40.6	40.6	40.6	96.782	896	896	0	153.04	By MS/MS	By MS/MS
MSMEG_3026|MSMEG_3026|conserved	MSMEG_3026|MSMEG_3026|conserved	2	2	2	MSMEG_3026|MSMEG_3026|conserved hypothetical protein|170 AA	1	2	2	2	2	2	2	2	2	2	2	2	2	2	2	2	2	2	2	2	2	2	2	2	2	2	2	2	2	2	2	2	2	2	17.6	17.6	17.6	18.138	170	170	0	28.623	By MS/MS	By MS/MS
MSMEG_3027|MSMEG_3027|conserved	MSMEG_3027|MSMEG_3027|conserved	2	2	2	MSMEG_3027|MSMEG_3027|conserved hypothetical protein|414 AA	1	2	2	2	2	2	2	2	2	2	2	2	2	2	2	2	2	2	2	2	2	2	2	2	2	2	2	2	2	2	2	2	2	2	7.2	7.2	7.2	44.543	414	414	0	4.2374	By MS/MS	By MS/MS
MSMEG_3028|aroE|shikimate-5-dehydrogenase|276	MSMEG_3028|aroE|shikimate-5-dehydrogenase|276	2	2	2	MSMEG_3028|aroE|shikimate-5-dehydrogenase|276 AA	1	2	2	2	2	2	2	2	2	2	2	2	2	2	2	2	2	2	2	2	2	2	2	2	2	2	2	2	2	2	2	2	2	2	8	8	8	28.138	276	276	0	4.1449	By MS/MS	By matching
MSMEG_3030|aroC|chorismate	MSMEG_3030|aroC|chorismate	11	11	11	MSMEG_3030|aroC|chorismate synthase|399 AA	1	11	11	11	7	5	9	7	7	6	5	8	8	10	7	5	9	7	7	6	5	8	8	10	7	5	9	7	7	6	5	8	8	10	51.4	51.4	51.4	41.943	399	399	0	104.07	By MS/MS	By MS/MS
MSMEG_3031|MSMEG_3031|shikimate	MSMEG_3031|MSMEG_3031|shikimate	1	1	1	MSMEG_3031|MSMEG_3031|shikimate kinase|244 AA	1	1	1	1	1	1	1	1	1	1	1	1	1	1	1	1	1	1	1	1	1	1	1	1	1	1	1	1	1	1	1	1	1	1	7	7	7	26.077	244	244	0	59.114	By MS/MS	By MS/MS
MSMEG_3033|aroB|3-dehydroquinate	MSMEG_3033|aroB|3-dehydroquinate	5	5	5	MSMEG_3033|aroB|3-dehydroquinate synthase|373 AA	1	5	5	5	3	3	2	3	2	2	4	3	3	4	3	3	2	3	2	2	4	3	3	4	3	3	2	3	2	2	4	3	3	4	25.5	25.5	25.5	39.316	373	373	0	9.9112	By matching	By MS/MS
MSMEG_3034|MSMEG_3034|metallopeptidase,	MSMEG_3034|MSMEG_3034|metallopeptidase,	9	9	9	MSMEG_3034|MSMEG_3034|metallopeptidase, M24 family protein|378 AA	1	9	9	9	7	7	7	8	7	8	7	9	9	7	7	7	7	8	7	8	7	9	9	7	7	7	7	8	7	8	7	9	9	7	34.4	34.4	34.4	39.791	378	378	0	102.65	By MS/MS	By MS/MS
MSMEG_3035|efp|translation	MSMEG_3035|efp|translation	3	3	3	MSMEG_3035|efp|translation elongation factor P|187 AA	1	3	3	3	3	3	3	3	3	3	3	3	3	3	3	3	3	3	3	3	3	3	3	3	3	3	3	3	3	3	3	3	3	3	31.6	31.6	31.6	20.553	187	187	0	14.007	By MS/MS	By MS/MS
MSMEG_3036|nusB|transcription	MSMEG_3036|nusB|transcription	5	5	5	MSMEG_3036|nusB|transcription antitermination factor NusB|160 AA	1	5	5	5	4	5	5	5	5	5	4	5	5	5	4	5	5	5	5	5	4	5	5	5	4	5	5	5	5	5	4	5	5	5	60	60	60	17.193	160	160	0	31.721	By MS/MS	By MS/MS
MSMEG_3040|MSMEG_3040|beta-lactamase|400	MSMEG_3040|MSMEG_3040|beta-lactamase|400	2	2	2	MSMEG_3040|MSMEG_3040|beta-lactamase|400 AA	1	2	2	2	1	1	1	1	0	1	1	1	2	1	1	1	1	1	0	1	1	1	2	1	1	1	1	1	0	1	1	1	2	1	7.2	7.2	7.2	43.354	400	400	0.0070765	1.9482	By matching	By matching
MSMEG_3041|MSMEG_3041|thiopurine	MSMEG_3041|MSMEG_3041|thiopurine	6	6	6	MSMEG_3041|MSMEG_3041|thiopurine S-methyltransferase (tpmt) superfamily protein|225 AA	1	6	6	6	5	6	6	6	6	6	6	6	6	6	5	6	6	6	6	6	6	6	6	6	5	6	6	6	6	6	6	6	6	6	54.7	54.7	54.7	23.739	225	225	0	109.02	By MS/MS	By MS/MS
MSMEG_3042|MSMEG_3042|PyrR	MSMEG_3042|MSMEG_3042|PyrR	2	2	2	MSMEG_3042|MSMEG_3042|PyrR bifunctional protein|185 AA	1	2	2	2	2	2	2	2	2	2	2	2	2	2	2	2	2	2	2	2	2	2	2	2	2	2	2	2	2	2	2	2	2	2	9.7	9.7	9.7	20.069	185	185	0.0049483	2.185	By MS/MS	By matching
MSMEG_3043|pyrB|aspartate	MSMEG_3043|pyrB|aspartate	10	10	10	MSMEG_3043|pyrB|aspartate carbamoyltransferase|318 AA	1	10	10	10	8	7	8	9	9	7	8	10	10	9	8	7	8	9	9	7	8	10	10	9	8	7	8	9	9	7	8	10	10	9	41.2	41.2	41.2	34.349	318	318	0	26.452	By MS/MS	By MS/MS
MSMEG_3044|MSMEG_3044|dihydroorotase|444	MSMEG_3044|MSMEG_3044|dihydroorotase|444	12	12	12	MSMEG_3044|MSMEG_3044|dihydroorotase|444 AA	1	12	12	12	8	11	9	10	11	9	9	10	9	10	8	11	9	10	11	9	9	10	9	10	8	11	9	10	11	9	9	10	9	10	37.6	37.6	37.6	46.572	444	444	0	171.31	By MS/MS	By MS/MS
MSMEG_3045|MSMEG_3045|integral	MSMEG_3045|MSMEG_3045|integral	1	1	1	MSMEG_3045|MSMEG_3045|integral membrane protein|166 AA	1	1	1	1	0	0	0	0	0	0	0	0	0	1	0	0	0	0	0	0	0	0	0	1	0	0	0	0	0	0	0	0	0	1	6.6	6.6	6.6	18.195	166	166	0.0079365	1.9021
MSMEG_3046|carA|carbamoyl-phosphate	MSMEG_3046|carA|carbamoyl-phosphate	5	5	5	MSMEG_3046|carA|carbamoyl-phosphate synthase, small subunit|382 AA	1	5	5	5	4	5	4	5	4	5	3	5	5	5	4	5	4	5	4	5	3	5	5	5	4	5	4	5	4	5	3	5	5	5	18.1	18.1	18.1	40.62	382	382	0	25.759	By matching	By MS/MS
MSMEG_3047|carB|carbamoyl-phosphate	MSMEG_3047|carB|carbamoyl-phosphate	10	10	10	MSMEG_3047|carB|carbamoyl-phosphate synthase, large subunit|1115 AA	1	10	10	10	9	8	9	9	8	9	10	8	8	10	9	8	9	9	8	9	10	8	8	10	9	8	9	9	8	9	10	8	8	10	12.3	12.3	12.3	119.53	1115	1115	0	115.22	By MS/MS	By MS/MS
MSMEG_3048|pyrF|orotidine	MSMEG_3048|pyrF|orotidine	3	3	3	MSMEG_3048|pyrF|orotidine 5-phosphate decarboxylase|276 AA	1	3	3	3	3	3	3	3	3	2	3	3	3	3	3	3	3	3	3	2	3	3	3	3	3	3	3	3	3	2	3	3	3	3	17.4	17.4	17.4	27.815	276	276	0	96.133	By MS/MS	By MS/MS
MSMEG_3050|MSMEG_3050|integration	MSMEG_3050|MSMEG_3050|integration	7	7	7	MSMEG_3050|MSMEG_3050|integration host factor|105 AA	1	7	7	7	5	7	5	5	6	6	6	6	5	6	5	7	5	5	6	6	6	6	5	6	5	7	5	5	6	6	6	6	5	6	50.5	50.5	50.5	11.635	105	105	0	115.99	By MS/MS	By MS/MS
MSMEG_3051|MSMEG_3051|guanylate	MSMEG_3051|MSMEG_3051|guanylate	2	2	2	MSMEG_3051|MSMEG_3051|guanylate kinase|200 AA	1	2	2	2	2	2	2	2	2	2	2	2	2	2	2	2	2	2	2	2	2	2	2	2	2	2	2	2	2	2	2	2	2	2	11.5	11.5	11.5	21.588	200	200	0	8.8125	By MS/MS	By matching
MSMEG_3053|rpoZ|DNA-directed	MSMEG_3053|rpoZ|DNA-directed	6	6	6	MSMEG_3053|rpoZ|DNA-directed RNA polymerase, omega subunit|107 AA	1	6	6	6	4	5	6	6	5	4	4	5	6	6	4	5	6	6	5	4	4	5	6	6	4	5	6	6	5	4	4	5	6	6	92.5	92.5	92.5	11.535	107	107	0	72.798	By MS/MS	By MS/MS
MSMEG_3054|coaBC|phosphopantothenoylcysteine	MSMEG_3054|coaBC|phosphopantothenoylcysteine	4	4	4	MSMEG_3054|coaBC|phosphopantothenoylcysteine decarboxylase/phosphopantothenate--cysteine ligase|414 AA	1	4	4	4	3	2	3	2	2	1	2	3	3	4	3	2	3	2	2	1	2	3	3	4	3	2	3	2	2	1	2	3	3	4	12.3	12.3	12.3	43.152	414	414	0	15.015	By MS/MS	By MS/MS
MSMEG_3055|metK|S-adenosylmethionine	MSMEG_3055|metK|S-adenosylmethionine	25	25	25	MSMEG_3055|metK|S-adenosylmethionine synthetase|399 AA	1	25	25	25	19	25	21	23	21	21	22	24	22	23	19	25	21	23	21	21	22	24	22	23	19	25	21	23	21	21	22	24	22	23	86	86	86	42.59	399	399	0	323.31	By MS/MS	By MS/MS
MSMEG_3056|MSMEG_3056|ABC	MSMEG_3056|MSMEG_3056|ABC	5	5	5	MSMEG_3056|MSMEG_3056|ABC transporter ATP-binding protein|331 AA	1	5	5	5	4	5	3	5	3	3	4	2	5	4	4	5	3	5	3	3	4	2	5	4	4	5	3	5	3	3	4	2	5	4	19.3	19.3	19.3	35.699	331	331	0	13.228	By MS/MS	By MS/MS
MSMEG_3058|MSMEG_3058|lipoprotein,	MSMEG_3058|MSMEG_3058|lipoprotein,	13	13	13	MSMEG_3058|MSMEG_3058|lipoprotein, nlpa family protein|279 AA	1	13	13	13	11	13	12	13	12	13	12	13	13	13	11	13	12	13	12	13	12	13	13	13	11	13	12	13	12	13	12	13	13	13	63.4	63.4	63.4	30.577	279	279	0	91.228	By MS/MS	By MS/MS
MSMEG_3059|MSMEG_3059|esterase|295	MSMEG_3059|MSMEG_3059|esterase|295	7	7	7	MSMEG_3059|MSMEG_3059|esterase|295 AA	1	7	7	7	4	6	7	6	7	6	5	6	7	7	4	6	7	6	7	6	5	6	7	7	4	6	7	6	7	6	5	6	7	7	41.4	41.4	41.4	30.968	295	295	0	153.31	By MS/MS	By MS/MS
MSMEG_3064|fmt|methionyl-tRNA	MSMEG_3064|fmt|methionyl-tRNA	6	6	6	MSMEG_3064|fmt|methionyl-tRNA formyltransferase|312 AA	1	6	6	6	6	6	6	6	5	6	6	6	6	6	6	6	6	6	5	6	6	6	6	6	6	6	6	6	5	6	6	6	6	6	32.1	32.1	32.1	33.007	312	312	0	53.443	By MS/MS	By MS/MS
MSMEG_3065|sun|ribosomal	MSMEG_3065|sun|ribosomal	6	6	6	MSMEG_3065|sun|ribosomal RNA small subunit methyltransferase B|464 AA	1	6	6	6	5	5	5	3	2	3	4	5	3	4	5	5	5	3	2	3	4	5	3	4	5	5	5	3	2	3	4	5	3	4	16.4	16.4	16.4	49.579	464	464	0	123.85	By MS/MS	By MS/MS
MSMEG_3066|rpe|ribulose-phosphate	MSMEG_3066|rpe|ribulose-phosphate	4	4	4	MSMEG_3066|rpe|ribulose-phosphate 3-epimerase|225 AA	1	4	4	4	3	4	3	3	3	3	4	4	4	2	3	4	3	3	3	3	4	4	4	2	3	4	3	3	3	3	4	4	4	2	36	36	36	23.7	225	225	0	21.896	By MS/MS	By MS/MS
MSMEG_3067|ribD|riboflavin	MSMEG_3067|ribD|riboflavin	2	2	2	MSMEG_3067|ribD|riboflavin biosynthesis protein RibD|335 AA	1	2	2	2	1	2	1	2	1	0	1	1	2	1	1	2	1	2	1	0	1	1	2	1	1	2	1	2	1	0	1	1	2	1	10.1	10.1	10.1	34.814	335	335	0	4.9926	By MS/MS	By MS/MS
MSMEG_3070|MSMEG_3070|LprG	MSMEG_3070|MSMEG_3070|LprG	5	5	5	MSMEG_3070|MSMEG_3070|LprG protein|236 AA	1	5	5	5	3	4	3	3	4	3	3	3	4	2	3	4	3	3	4	3	3	3	4	2	3	4	3	3	4	3	3	3	4	2	41.1	41.1	41.1	24.108	236	236	0	26.925	By MS/MS	By MS/MS
MSMEG_3071|ribE|riboflavin	MSMEG_3071|ribE|riboflavin	5	5	5	MSMEG_3071|ribE|riboflavin synthase, alpha subunit|199 AA	1	5	5	5	2	3	2	4	3	2	2	5	5	4	2	3	2	4	3	2	2	5	5	4	2	3	2	4	3	2	2	5	5	4	31.2	31.2	31.2	20.809	199	199	0	11.932	By MS/MS	By MS/MS
MSMEG_3072|MSMEG_3072|riboflavin	MSMEG_3072|MSMEG_3072|riboflavin	15	15	15	MSMEG_3072|MSMEG_3072|riboflavin biosynthesis protein ribAB|439 AA	1	15	15	15	10	12	12	13	12	12	13	14	13	12	10	12	12	13	12	12	13	14	13	12	10	12	12	13	12	12	13	14	13	12	51.5	51.5	51.5	47.881	439	439	0	168.5	By MS/MS	By MS/MS
MSMEG_3073|ribE|6,7-dimethyl-8-ribityllumazine	MSMEG_3073|ribE|6,7-dimethyl-8-ribityllumazine	6	6	6	MSMEG_3073|ribE|6,7-dimethyl-8-ribityllumazine synthase|158 AA	1	6	6	6	6	6	6	6	6	6	6	6	6	6	6	6	6	6	6	6	6	6	6	6	6	6	6	6	6	6	6	6	6	6	50.6	50.6	50.6	16.187	158	158	0	175.02	By MS/MS	By MS/MS
MSMEG_3081|MSMEG_3081|conserved	MSMEG_3081|MSMEG_3081|conserved	7	7	7	MSMEG_3081|MSMEG_3081|conserved hypothetical protein|321 AA	1	7	7	7	5	4	6	5	6	5	5	6	6	5	5	4	6	5	6	5	5	6	6	5	5	4	6	5	6	5	5	6	6	5	26.8	26.8	26.8	34.463	321	321	0	37.476	By MS/MS	By MS/MS
MSMEG_3084|gap|glyceraldehyde-3-phosphate	MSMEG_3084|gap|glyceraldehyde-3-phosphate	18	18	18	MSMEG_3084|gap|glyceraldehyde-3-phosphate dehydrogenase, type I|340 AA	1	18	18	18	14	17	17	17	17	16	16	17	18	18	14	17	17	17	17	16	16	17	18	18	14	17	17	17	17	16	16	17	18	18	80.6	80.6	80.6	35.947	340	340	0	289.75	By MS/MS	By MS/MS
MSMEG_3085|pgk|phosphoglycerate	MSMEG_3085|pgk|phosphoglycerate	21	21	21	MSMEG_3085|pgk|phosphoglycerate kinase|408 AA	1	21	21	21	19	19	19	20	21	20	21	20	20	21	19	19	19	20	21	20	21	20	20	21	19	19	19	20	21	20	21	20	20	21	80.1	80.1	80.1	42.094	408	408	0	285.57	By MS/MS	By MS/MS
MSMEG_3086|tpiA|triosephosphate	MSMEG_3086|tpiA|triosephosphate	14	14	14	MSMEG_3086|tpiA|triosephosphate isomerase|261 AA	1	14	14	14	9	12	10	10	12	12	10	12	13	11	9	12	10	10	12	12	10	12	13	11	9	12	10	10	12	12	10	12	13	11	84.7	84.7	84.7	27.377	261	261	0	100.73	By MS/MS	By MS/MS
MSMEG_3094|MSMEG_3094|oxidoreductase,	MSMEG_3094|MSMEG_3094|oxidoreductase,	3	3	3	MSMEG_3094|MSMEG_3094|oxidoreductase, zinc-binding dehydrogenase family protein|363 AA	1	3	3	3	3	3	3	3	3	3	3	3	3	3	3	3	3	3	3	3	3	3	3	3	3	3	3	3	3	3	3	3	3	3	9.9	9.9	9.9	38.493	363	363	0	17.715	By MS/MS	By MS/MS
MSMEG_3095|MSMEG_3095|D-ribose-binding	MSMEG_3095|MSMEG_3095|D-ribose-binding	12	12	12	MSMEG_3095|MSMEG_3095|D-ribose-binding periplasmic protein|311 AA	1	12	12	12	11	11	8	9	9	10	11	10	10	9	11	11	8	9	9	10	11	10	10	9	11	11	8	9	9	10	11	10	10	9	62.7	62.7	62.7	32.053	311	311	0	100.94	By MS/MS	By MS/MS
MSMEG_3097|ppc|phosphoenolpyruvate	MSMEG_3097|ppc|phosphoenolpyruvate	3	3	3	MSMEG_3097|ppc|phosphoenolpyruvate carboxylase|933 AA	1	3	3	3	0	2	2	2	2	2	3	2	2	3	0	2	2	2	2	2	3	2	2	3	0	2	2	2	2	2	3	2	2	3	3.4	3.4	3.4	103.35	933	933	0	3.9304		By MS/MS
MSMEG_3099|pgl|6-phosphogluconolactonase|244	MSMEG_3099|pgl|6-phosphogluconolactonase|244	10	10	10	MSMEG_3099|pgl|6-phosphogluconolactonase|244 AA	1	10	10	10	8	10	10	9	10	10	10	10	9	10	8	10	10	9	10	10	10	10	9	10	8	10	10	9	10	10	10	10	9	10	48	48	48	25.586	244	244	0	132.05	By MS/MS	By MS/MS
MSMEG_3100|opcA|OpcA	MSMEG_3100|opcA|OpcA	15	15	15	MSMEG_3100|opcA|OpcA protein|303 AA	1	15	15	15	9	8	10	12	13	11	10	11	11	12	9	8	10	12	13	11	10	11	11	12	9	8	10	12	13	11	10	11	11	12	66.3	66.3	66.3	32.518	303	303	0	62.569	By MS/MS	By MS/MS
MSMEG_3101|zwf|glucose-6-phosphate	MSMEG_3101|zwf|glucose-6-phosphate	18	18	17	MSMEG_3101|zwf|glucose-6-phosphate 1-dehydrogenase|516 AA	1	18	18	17	12	15	14	15	15	15	16	15	17	16	12	15	14	15	15	15	16	15	17	16	11	14	13	14	14	14	15	14	16	15	49.4	49.4	47.7	57.94	516	516	0	270.43	By MS/MS	By MS/MS
MSMEG_3102|tal|transaldolase|371;MSMEG_4415|tal|transaldolase|370	MSMEG_3102|tal|transaldolase|371	25;2	25;2	25;2	MSMEG_3102|tal|transaldolase|371 AA	2	25	25	25	23	25	24	24	25	25	24	25	24	25	23	25	24	24	25	25	24	25	24	25	23	25	24	24	25	25	24	25	24	25	78.2	78.2	78.2	39.935	371	371;370	0	323.31	By MS/MS	By MS/MS
MSMEG_3103|tkt|transketolase|696	MSMEG_3103|tkt|transketolase|696	35	35	35	MSMEG_3103|tkt|transketolase|696 AA	1	35	35	35	25	34	26	31	31	29	30	33	33	33	25	34	26	31	31	29	30	33	33	33	25	34	26	31	31	29	30	33	33	33	68.7	68.7	68.7	75.154	696	696	0	323.31	By MS/MS	By MS/MS
MSMEG_3106|MSMEG_3106|quinone	MSMEG_3106|MSMEG_3106|quinone	12	12	12	MSMEG_3106|MSMEG_3106|quinone oxidoreductase|342 AA	1	12	12	12	9	12	12	12	12	11	10	12	12	12	9	12	12	12	12	11	10	12	12	12	9	12	12	12	12	11	10	12	12	12	70.5	70.5	70.5	35.542	342	342	0	236.95	By MS/MS	By MS/MS
MSMEG_3107|MSMEG_3107|conserved	MSMEG_3107|MSMEG_3107|conserved	3	3	3	MSMEG_3107|MSMEG_3107|conserved hypothetical protein|312 AA	1	3	3	3	1	0	3	2	3	2	1	3	1	1	1	0	3	2	3	2	1	3	1	1	1	0	3	2	3	2	1	3	1	1	14.7	14.7	14.7	33.885	312	312	0	4.2667	By matching
MSMEG_3108|MSMEG_3108|ABC	MSMEG_3108|MSMEG_3108|ABC	2	2	2	MSMEG_3108|MSMEG_3108|ABC transporter, ATPase subunit|355 AA	1	2	2	2	0	0	2	2	0	1	1	1	1	1	0	0	2	2	0	1	1	1	1	1	0	0	2	2	0	1	1	1	1	1	11	11	11	38.108	355	355	0	6.2887
MSMEG_3111|MSMEG_3111|extracellular	MSMEG_3111|MSMEG_3111|extracellular	8	8	8	MSMEG_3111|MSMEG_3111|extracellular solute-binding protein, family protein 1|442 AA	1	8	8	8	5	6	4	5	5	5	7	3	6	7	5	6	4	5	5	5	7	3	6	7	5	6	4	5	5	5	7	3	6	7	26.2	26.2	26.2	47.284	442	442	0	26.381	By MS/MS	By MS/MS
MSMEG_3112|MSMEG_3112|estradiol	MSMEG_3112|MSMEG_3112|estradiol	6	6	6	MSMEG_3112|MSMEG_3112|estradiol 17-beta-dehydrogenase 8|264 AA	1	6	6	6	4	4	5	6	5	6	4	5	5	5	4	4	5	6	5	6	4	5	5	5	4	4	5	6	5	6	4	5	5	5	37.9	37.9	37.9	27.231	264	264	0	55.567	By MS/MS	By MS/MS
MSMEG_3114|MSMEG_3114|conserved	MSMEG_3114|MSMEG_3114|conserved	2	2	2	MSMEG_3114|MSMEG_3114|conserved hypothetical protein|271 AA	1	2	2	2	1	2	2	2	2	2	2	1	1	2	1	2	2	2	2	2	2	1	1	2	1	2	2	2	2	2	2	1	1	2	8.9	8.9	8.9	28.753	271	271	0	3.953	By MS/MS	By MS/MS
MSMEG_3119|MSMEG_3119|ABC	MSMEG_3119|MSMEG_3119|ABC	5	5	5	MSMEG_3119|MSMEG_3119|ABC transporter, ATP-binding subunit|322 AA	1	5	5	5	3	3	2	4	2	3	1	2	2	2	3	3	2	4	2	3	1	2	2	2	3	3	2	4	2	3	1	2	2	2	20.5	20.5	20.5	34.494	322	322	0	8.5033	By MS/MS	By MS/MS
MSMEG_3121|MSMEG_3121|DNA-binding	MSMEG_3121|MSMEG_3121|DNA-binding	2	2	2	MSMEG_3121|MSMEG_3121|DNA-binding protein|281 AA	1	2	2	2	2	2	2	2	2	2	2	2	2	2	2	2	2	2	2	2	2	2	2	2	2	2	2	2	2	2	2	2	2	2	10.7	10.7	10.7	29.535	281	281	0	6.4944	By MS/MS	By MS/MS
MSMEG_3122|sufB|FeS	MSMEG_3122|sufB|FeS	14	14	14	MSMEG_3122|sufB|FeS assembly protein SufB|477 AA	1	14	14	14	10	9	12	11	11	10	11	11	12	11	10	9	12	11	11	10	11	11	12	11	10	9	12	11	11	10	11	11	12	11	37.7	37.7	37.7	52.735	477	477	0	135.85	By MS/MS	By MS/MS
MSMEG_3123|sufD|FeS	MSMEG_3123|sufD|FeS	10	10	10	MSMEG_3123|sufD|FeS assembly protein SufD|403 AA	1	10	10	10	7	8	10	9	9	10	10	9	10	10	7	8	10	9	9	10	10	9	10	10	7	8	10	9	9	10	10	9	10	10	38.2	38.2	38.2	43.146	403	403	0	77.531	By MS/MS	By MS/MS
MSMEG_3124|sufC|FeS	MSMEG_3124|sufC|FeS	8	8	8	MSMEG_3124|sufC|FeS assembly ATPase SufC|257 AA	1	8	8	8	6	7	6	6	7	6	7	6	6	7	6	7	6	6	7	6	7	6	6	7	6	7	6	6	7	6	7	6	6	7	54.1	54.1	54.1	27.561	257	257	0	219.51	By MS/MS	By MS/MS
MSMEG_3125|MSMEG_3125|cysteine	MSMEG_3125|MSMEG_3125|cysteine	11	11	11	MSMEG_3125|MSMEG_3125|cysteine desulfurase|414 AA	1	11	11	11	7	10	10	11	11	11	11	10	9	10	7	10	10	11	11	11	11	10	9	10	7	10	10	11	11	11	11	10	9	10	39.4	39.4	39.4	43.943	414	414	0	267.85	By MS/MS	By MS/MS
MSMEG_3126|MSMEG_3126|SUF	MSMEG_3126|MSMEG_3126|SUF	4	4	4	MSMEG_3126|MSMEG_3126|SUF system FeS assembly protein, NifU family protein|164 AA	1	4	4	4	3	3	4	4	4	3	4	3	2	3	3	3	4	4	4	3	4	3	2	3	3	3	4	4	4	3	4	3	2	3	33.5	33.5	33.5	17.742	164	164	0	24.369	By MS/MS	By MS/MS
MSMEG_3127|MSMEG_3127|conserved	MSMEG_3127|MSMEG_3127|conserved	5	5	5	MSMEG_3127|MSMEG_3127|conserved protein, DUF59|113 AA	1	5	5	5	4	5	5	5	5	5	4	5	5	5	4	5	5	5	5	5	4	5	5	5	4	5	5	5	5	5	4	5	5	5	85	85	85	12.33	113	113	0	87.579	By MS/MS	By MS/MS
MSMEG_3136|MSMEG_3136|heme	MSMEG_3136|MSMEG_3136|heme	2	2	2	MSMEG_3136|MSMEG_3136|heme peroxidase superfamily protein|239 AA	1	2	2	2	1	2	1	1	1	1	2	2	2	2	1	2	1	1	1	1	2	2	2	2	1	2	1	1	1	1	2	2	2	2	11.7	11.7	11.7	25.383	239	239	0	4.3502	By MS/MS	By MS/MS
MSMEG_3137|MSMEG_3137|oxidoreductase|369	MSMEG_3137|MSMEG_3137|oxidoreductase|369	2	2	2	MSMEG_3137|MSMEG_3137|oxidoreductase|369 AA	1	2	2	2	1	1	1	2	0	0	1	1	2	1	1	1	1	2	0	0	1	1	2	1	1	1	1	2	0	0	1	1	2	1	6.5	6.5	6.5	39.043	369	369	0	3.2668	By MS/MS	By matching
MSMEG_3138|trx|thioredoxin|124	MSMEG_3138|trx|thioredoxin|124	7	7	7	MSMEG_3138|trx|thioredoxin|124 AA	1	7	7	7	7	6	7	7	7	7	7	7	7	7	7	6	7	7	7	7	7	7	7	7	7	6	7	7	7	7	7	7	7	7	63.7	63.7	63.7	13.305	124	124	0	73.226	By MS/MS	By MS/MS
MSMEG_3140|MSMEG_3140|ABC	MSMEG_3140|MSMEG_3140|ABC	6	6	6	MSMEG_3140|MSMEG_3140|ABC transporter ATP-binding protein, possibly in EF-3 subfamily protein|542 AA	1	6	6	6	6	5	4	4	3	3	5	5	6	5	6	5	4	4	3	3	5	5	6	5	6	5	4	4	3	3	5	5	6	5	16.8	16.8	16.8	58.47	542	542	0	14.598	By MS/MS	By MS/MS
MSMEG_3141|MSMEG_3141|conserved	MSMEG_3141|MSMEG_3141|conserved	3	3	3	MSMEG_3141|MSMEG_3141|conserved domain protein|65 AA	1	3	3	3	1	3	1	2	1	2	2	2	2	2	1	3	1	2	1	2	2	2	2	2	1	3	1	2	1	2	2	2	2	2	52.3	52.3	52.3	7.3411	65	65	0	6.0045	By matching	By MS/MS
MSMEG_3142|MSMEG_3142|HTH-type	MSMEG_3142|MSMEG_3142|HTH-type	3	3	3	MSMEG_3142|MSMEG_3142|HTH-type transcriptional repressor AcnR|204 AA	1	3	3	3	2	3	3	3	2	2	2	2	3	2	2	3	3	3	2	2	2	2	3	2	2	3	3	3	2	2	2	2	3	2	19.6	19.6	19.6	23.095	204	204	0	11.129	By MS/MS	By matching
MSMEG_3143|acnA|aconitate	MSMEG_3143|acnA|aconitate	47	47	47	MSMEG_3143|acnA|aconitate hydratase 1|943 AA	1	47	47	47	43	44	43	44	45	43	44	46	46	46	43	44	43	44	45	43	44	46	46	46	43	44	43	44	45	43	44	46	46	46	66.8	66.8	66.8	102.17	943	943	0	323.31	By MS/MS	By MS/MS
MSMEG_3144|MSMEG_3144|putative	MSMEG_3144|MSMEG_3144|putative	4	4	4	MSMEG_3144|MSMEG_3144|putative membrane protein|200 AA	1	4	4	4	4	3	3	4	4	4	4	4	4	4	4	3	3	4	4	4	4	4	4	4	4	3	3	4	4	4	4	4	4	4	34.5	34.5	34.5	20.759	200	200	0	45.098	By MS/MS	By MS/MS
MSMEG_3145|MSMEG_3145|secreted	MSMEG_3145|MSMEG_3145|secreted	3	3	3	MSMEG_3145|MSMEG_3145|secreted cell wall-associated hydrolase|497 AA	1	3	3	3	3	2	3	2	2	3	2	2	1	1	3	2	3	2	2	3	2	2	1	1	3	2	3	2	2	3	2	2	1	1	7.8	7.8	7.8	51.316	497	497	0	9.2245	By MS/MS	By MS/MS
MSMEG_3147|moxR|ATPase,	MSMEG_3147|moxR|ATPase,	13	13	12	MSMEG_3147|moxR|ATPase, MoxR family protein|348 AA	1	13	13	12	7	8	8	9	11	7	9	10	10	11	7	8	8	9	11	7	9	10	10	11	7	8	8	9	10	7	9	10	10	10	52.3	52.3	48.6	38.051	348	348	0	47.495	By MS/MS	By MS/MS
MSMEG_3148|MSMEG_3148|conserved	MSMEG_3148|MSMEG_3148|conserved	1	1	1	MSMEG_3148|MSMEG_3148|conserved hypothetical protein|315 AA	1	1	1	1	1	1	1	1	1	1	1	1	1	1	1	1	1	1	1	1	1	1	1	1	1	1	1	1	1	1	1	1	1	1	6.7	6.7	6.7	34.625	315	315	0.0092227	1.8673	By MS/MS	By matching
MSMEG_3149|MSMEG_3149|conserved	MSMEG_3149|MSMEG_3149|conserved	1	1	1	MSMEG_3149|MSMEG_3149|conserved hypothetical protein|327 AA	1	1	1	1	0	0	0	0	0	0	0	0	0	1	0	0	0	0	0	0	0	0	0	1	0	0	0	0	0	0	0	0	0	1	9.5	9.5	9.5	34.948	327	327	0	3.3374
MSMEG_3150|fabG|3-oxoacyl-(acyl-carrier-protein)	MSMEG_3150|fabG|3-oxoacyl-(acyl-carrier-protein)	12	12	12	MSMEG_3150|fabG|3-oxoacyl-(acyl-carrier-protein) reductase|255 AA	1	12	12	12	10	9	9	11	10	10	10	10	10	11	10	9	9	11	10	10	10	10	10	11	10	9	9	11	10	10	10	10	10	11	68.2	68.2	68.2	26.641	255	255	0	186.52	By MS/MS	By MS/MS
MSMEG_3151|MSMEG_3151|[NADH]	MSMEG_3151|MSMEG_3151|[NADH]	2	2	2	MSMEG_3151|MSMEG_3151|[NADH] enoyl-[acyl-carrier-protein] reductase|269 AA	1	2	2	2	1	1	1	2	1	2	2	1	2	2	1	1	1	2	1	2	2	1	2	2	1	1	1	2	1	2	2	1	2	2	11.5	11.5	11.5	28.527	269	269	0	6.0427	By MS/MS	By matching
MSMEG_3152|hemH|ferrochelatase|340	MSMEG_3152|hemH|ferrochelatase|340	6	6	6	MSMEG_3152|hemH|ferrochelatase|340 AA	1	6	6	6	4	4	4	5	5	5	5	5	6	5	4	4	4	5	5	5	5	5	6	5	4	4	4	5	5	5	5	5	6	5	25.9	25.9	25.9	36.976	340	340	0	25.965	By MS/MS	By MS/MS
MSMEG_3155|MSMEG_3155|band	MSMEG_3155|MSMEG_3155|band	6	6	6	MSMEG_3155|MSMEG_3155|band 7 protein|408 AA	1	6	6	6	6	5	6	5	5	6	5	6	6	6	6	5	6	5	5	6	5	6	6	6	6	5	6	5	5	6	5	6	6	6	24.3	24.3	24.3	43.982	408	408	0	17.216	By MS/MS	By MS/MS
MSMEG_3158|mutA|methylmalonyl-CoA	MSMEG_3158|mutA|methylmalonyl-CoA	22	22	22	MSMEG_3158|mutA|methylmalonyl-CoA mutase, small subunit|623 AA	1	22	22	22	17	17	17	21	18	19	18	19	20	18	17	17	17	21	18	19	18	19	20	18	17	17	17	21	18	19	18	19	20	18	57	57	57	64.865	623	623	0	207.02	By MS/MS	By MS/MS
MSMEG_3159|MSMEG_3159|methylmalonyl-CoA	MSMEG_3159|MSMEG_3159|methylmalonyl-CoA	18	18	18	MSMEG_3159|MSMEG_3159|methylmalonyl-CoA mutase large subunit|751 AA	1	18	18	18	15	16	16	16	18	16	18	17	16	18	15	16	16	16	18	16	18	17	16	18	15	16	16	16	18	16	18	17	16	18	36.4	36.4	36.4	80.583	751	751	0	323.31	By MS/MS	By MS/MS
MSMEG_3160|MSMEG_3160|LAO/AO	MSMEG_3160|MSMEG_3160|LAO/AO	4	4	4	MSMEG_3160|MSMEG_3160|LAO/AO transport system ATPase|325 AA	1	4	4	4	3	1	3	3	3	3	1	3	2	3	3	1	3	3	3	3	1	3	2	3	3	1	3	3	3	3	1	3	2	3	16	16	16	35.182	325	325	0	21.266	By matching	By MS/MS
MSMEG_3161|MSMEG_3161|conserved	MSMEG_3161|MSMEG_3161|conserved	1	1	1	MSMEG_3161|MSMEG_3161|conserved hypothetical protein|116 AA	1	1	1	1	1	1	1	1	1	1	1	1	1	1	1	1	1	1	1	1	1	1	1	1	1	1	1	1	1	1	1	1	1	1	14.7	14.7	14.7	11.831	116	116	0	34.241	By matching	By MS/MS
MSMEG_3169|ileS|isoleucyl-tRNA	MSMEG_3169|ileS|isoleucyl-tRNA	32	32	32	MSMEG_3169|ileS|isoleucyl-tRNA synthetase|1040 AA	1	32	32	32	20	26	25	27	25	21	26	29	27	26	20	26	25	27	25	21	26	29	27	26	20	26	25	27	25	21	26	29	27	26	45.6	45.6	45.6	117.32	1040	1040	0	224.47	By MS/MS	By MS/MS
MSMEG_3170|MSMEG_3170|conserved	MSMEG_3170|MSMEG_3170|conserved	1	1	1	MSMEG_3170|MSMEG_3170|conserved domain protein|72 AA	1	1	1	1	1	1	1	1	1	1	1	1	1	1	1	1	1	1	1	1	1	1	1	1	1	1	1	1	1	1	1	1	1	1	16.7	16.7	16.7	7.7346	72	72	0	6.0507	By MS/MS	By MS/MS
MSMEG_3171|MSMEG_3171|conserved	MSMEG_3171|MSMEG_3171|conserved	3	3	3	MSMEG_3171|MSMEG_3171|conserved hypothetical protein|162 AA	1	3	3	3	2	3	2	2	3	2	3	2	3	3	2	3	2	2	3	2	3	2	3	3	2	3	2	2	3	2	3	2	3	3	23.5	23.5	23.5	16.678	162	162	0	28.267	By MS/MS	By MS/MS
MSMEG_3173|MSMEG_3173|L-asparaginase|320	MSMEG_3173|MSMEG_3173|L-asparaginase|320	3	3	3	MSMEG_3173|MSMEG_3173|L-asparaginase|320 AA	1	3	3	3	1	2	3	2	3	2	3	3	2	2	1	2	3	2	3	2	3	3	2	2	1	2	3	2	3	2	3	3	2	2	20.3	20.3	20.3	32.351	320	320	0	4.8806	By matching	By MS/MS
MSMEG_3183|ilvA|threonine	MSMEG_3183|ilvA|threonine	6	6	6	MSMEG_3183|ilvA|threonine dehydratase|430 AA	1	6	6	6	3	4	3	5	6	4	4	5	6	6	3	4	3	5	6	4	4	5	6	6	3	4	3	5	6	4	4	5	6	6	22.3	22.3	22.3	45.361	430	430	0	43.245	By MS/MS	By MS/MS
MSMEG_3184|treZ|malto-oligosyltrehalose	MSMEG_3184|treZ|malto-oligosyltrehalose	9	9	9	MSMEG_3184|treZ|malto-oligosyltrehalose trehalohydrolase|583 AA	1	9	9	9	5	6	4	6	5	5	6	6	7	7	5	6	4	6	5	5	6	6	7	7	5	6	4	6	5	5	6	6	7	7	21.4	21.4	21.4	64.617	583	583	0	22.849	By matching	By MS/MS
MSMEG_3186|glgX|glycogen	MSMEG_3186|glgX|glycogen	12	10	10	MSMEG_3186|glgX|glycogen debranching enzyme GlgX|718 AA	1	12	10	10	8	7	6	9	7	8	7	7	11	9	6	5	4	7	5	6	5	5	9	7	6	5	4	7	5	6	5	5	9	7	24.8	22.3	22.3	80.248	718	718	0	39.832	By MS/MS	By MS/MS
MSMEG_3188|bioA|adenosylmethionine-8-amino-7-oxononanoate	MSMEG_3188|bioA|adenosylmethionine-8-amino-7-oxononanoate	8	8	8	MSMEG_3188|bioA|adenosylmethionine-8-amino-7-oxononanoate transaminase|432 AA	1	8	8	8	3	5	4	6	5	4	5	5	7	7	3	5	4	6	5	4	5	5	7	7	3	5	4	6	5	4	5	5	7	7	31.5	31.5	31.5	45.59	432	432	0	21.074	By MS/MS	By MS/MS
MSMEG_3195|MSMEG_3195|conserved	MSMEG_3195|MSMEG_3195|conserved	1	1	1	MSMEG_3195|MSMEG_3195|conserved hypothetical protein|80 AA	1	1	1	1	0	1	0	0	0	0	1	1	1	1	0	1	0	0	0	0	1	1	1	1	0	1	0	0	0	0	1	1	1	1	20	20	20	8.6468	80	80	0.009628	1.841		By MS/MS
MSMEG_3199|nadA|quinolinate	MSMEG_3199|nadA|quinolinate	14	14	14	MSMEG_3199|nadA|quinolinate synthetase complex, A subunit|347 AA	1	14	14	14	10	12	10	11	10	11	12	11	12	12	10	12	10	11	10	11	12	11	12	12	10	12	10	11	10	11	12	11	12	12	70.9	70.9	70.9	36.859	347	347	0	77.405	By MS/MS	By MS/MS
MSMEG_3201|nadC|nicotinate-nucleotide	MSMEG_3201|nadC|nicotinate-nucleotide	7	7	7	MSMEG_3201|nadC|nicotinate-nucleotide pyrophosphorylase|288 AA	1	7	7	7	6	6	4	6	5	5	6	5	6	6	6	6	4	6	5	5	6	5	6	6	6	6	4	6	5	5	6	5	6	6	43.4	43.4	43.4	30.319	288	288	0	43.76	By MS/MS	By MS/MS
MSMEG_3205|hisD|histidinol	MSMEG_3205|hisD|histidinol	10	10	10	MSMEG_3205|hisD|histidinol dehydrogenase|445 AA	1	10	10	10	6	9	8	9	8	9	9	9	9	10	6	9	8	9	8	9	9	9	9	10	6	9	8	9	8	9	9	9	9	10	32.1	32.1	32.1	46.702	445	445	0	109.35	By MS/MS	By MS/MS
MSMEG_3206|hisC|histidinol-phosphate	MSMEG_3206|hisC|histidinol-phosphate	14	14	14	MSMEG_3206|hisC|histidinol-phosphate aminotransferase|379 AA	1	14	14	14	7	10	9	11	12	11	9	12	13	14	7	10	9	11	12	11	9	12	13	14	7	10	9	11	12	11	9	12	13	14	58	58	58	40.226	379	379	0	63.643	By MS/MS	By MS/MS
MSMEG_3208|hisH|imidazole	MSMEG_3208|hisH|imidazole	3	3	3	MSMEG_3208|hisH|imidazole glycerol phosphate synthase, glutamine amidotransferase subunit|205 AA	1	3	3	3	3	3	3	2	1	2	2	1	2	3	3	3	3	2	1	2	2	1	2	3	3	3	3	2	1	2	2	1	2	3	18.5	18.5	18.5	21.506	205	205	0	4.9082	By MS/MS	By MS/MS
MSMEG_3209|MSMEG_3209|bifunctional	MSMEG_3209|MSMEG_3209|bifunctional	12	12	12	MSMEG_3209|MSMEG_3209|bifunctional HisA/TrpF protein|258 AA	1	12	12	12	11	12	12	12	12	12	11	12	12	12	11	12	12	12	12	12	11	12	12	12	11	12	12	12	12	12	11	12	12	12	70.5	70.5	70.5	26.408	258	258	0	323.31	By MS/MS	By MS/MS
MSMEG_3210|MSMEG_3210|inositol	MSMEG_3210|MSMEG_3210|inositol	1	1	1	MSMEG_3210|MSMEG_3210|inositol monophosphate phosphatase|276 AA	1	1	1	1	1	0	1	1	1	0	1	0	1	0	1	0	1	1	1	0	1	0	1	0	1	0	1	1	1	0	1	0	1	0	6.9	6.9	6.9	28.674	276	276	0	3.8419	By MS/MS
MSMEG_3211|hisF|imidazoleglycerol	MSMEG_3211|hisF|imidazoleglycerol	5	5	5	MSMEG_3211|hisF|imidazoleglycerol phosphate synthase, cyclase subunit|261 AA	1	5	5	5	5	4	4	4	4	5	5	3	4	4	5	4	4	4	4	5	5	3	4	4	5	4	4	4	4	5	5	3	4	4	25.3	25.3	25.3	27.073	261	261	0	10.066	By MS/MS	By matching
MSMEG_3212|hisIE|phosphoribosyl-AMP	MSMEG_3212|hisIE|phosphoribosyl-AMP	3	3	3	MSMEG_3212|hisIE|phosphoribosyl-AMP pyrophosphatase/phosphoribosyl-ATP cyclohydrolase|115 AA	1	3	3	3	2	1	2	3	2	1	2	2	3	2	2	1	2	3	2	1	2	2	3	2	2	1	2	3	2	1	2	2	3	2	31.3	31.3	31.3	12.461	115	115	0	24.056	By MS/MS	By MS/MS
MSMEG_3214|MSMEG_3214|hypothetical	MSMEG_3214|MSMEG_3214|hypothetical	3	3	3	MSMEG_3214|MSMEG_3214|hypothetical protein|330 AA	1	3	3	3	1	1	2	1	1	0	2	1	0	2	1	1	2	1	1	0	2	1	0	2	1	1	2	1	1	0	2	1	0	2	9.1	9.1	9.1	36.485	330	330	0	4.1617	By MS/MS	By MS/MS
MSMEG_3215|MSMEG_3215|ABC-type	MSMEG_3215|MSMEG_3215|ABC-type	1	1	1	MSMEG_3215|MSMEG_3215|ABC-type molybdenum transport system, ATPase component/photorepair protein PhrA|265 AA	1	1	1	1	1	1	1	1	1	1	1	1	1	1	1	1	1	1	1	1	1	1	1	1	1	1	1	1	1	1	1	1	1	1	6	6	6	28.731	265	265	0	4.629	By matching	By matching
MSMEG_3216|MSMEG_3216|peroxiredoxin	MSMEG_3216|MSMEG_3216|peroxiredoxin	3	3	3	MSMEG_3216|MSMEG_3216|peroxiredoxin Q|154 AA	1	3	3	3	1	2	3	3	3	3	2	3	1	2	1	2	3	3	3	3	2	3	1	2	1	2	3	3	3	3	2	3	1	2	39	39	39	16.556	154	154	0	40.146	By matching	By MS/MS
MSMEG_3217|trpE|anthranilate	MSMEG_3217|trpE|anthranilate	16	16	16	MSMEG_3217|trpE|anthranilate synthase component I|524 AA	1	16	16	16	12	13	13	14	14	13	12	15	16	16	12	13	13	14	14	13	12	15	16	16	12	13	13	14	14	13	12	15	16	16	53.4	53.4	53.4	56.311	524	524	0	188.5	By MS/MS	By MS/MS
MSMEG_3219|trpC|indole-3-glycerol	MSMEG_3219|trpC|indole-3-glycerol	15	15	15	MSMEG_3219|trpC|indole-3-glycerol phosphate synthase|272 AA	1	15	15	15	12	15	15	14	13	13	14	14	14	14	12	15	15	14	13	13	14	14	14	14	12	15	15	14	13	13	14	14	14	14	64	64	64	28.37	272	272	0	120.84	By MS/MS	By MS/MS
MSMEG_3220|trpB|tryptophan	MSMEG_3220|trpB|tryptophan	8	8	8	MSMEG_3220|trpB|tryptophan synthase, beta subunit|425 AA	1	8	8	8	4	6	5	8	7	4	5	8	8	8	4	6	5	8	7	4	5	8	8	8	4	6	5	8	7	4	5	8	8	8	30.1	30.1	30.1	45.005	425	425	0	39.204	By MS/MS	By MS/MS
MSMEG_3221|trpA|tryptophan	MSMEG_3221|trpA|tryptophan	11	11	11	MSMEG_3221|trpA|tryptophan synthase, alpha subunit|262 AA	1	11	11	11	7	10	10	10	8	10	8	9	9	9	7	10	10	10	8	10	8	9	9	9	7	10	10	10	8	10	8	9	9	9	64.5	64.5	64.5	27.073	262	262	0	92.963	By MS/MS	By MS/MS
MSMEG_3222|MSMEG_3222|prolipoprotein	MSMEG_3222|MSMEG_3222|prolipoprotein	2	2	2	MSMEG_3222|MSMEG_3222|prolipoprotein diacylglyceryl transferase|616 AA	1	2	2	2	1	1	2	1	1	1	1	1	1	1	1	1	2	1	1	1	1	1	1	1	1	1	2	1	1	1	1	1	1	1	6	6	6	65.041	616	616	0	31.727	By MS/MS	By matching
MSMEG_3226|MSMEG_3226|glutamate	MSMEG_3226|MSMEG_3226|glutamate	5	4	4	MSMEG_3226|MSMEG_3226|glutamate synthase, NADH/nadph, small subunit|500 AA	1	5	4	4	2	3	4	5	4	4	5	2	4	3	2	2	3	4	3	3	4	1	3	2	2	2	3	4	3	3	4	1	3	2	16	13.4	13.4	53.852	500	500	0	98.093	By MS/MS	By MS/MS
MSMEG_3227|pyk|pyruvate;REV__MSMEG_3450|dehII|haloacid	MSMEG_3227|pyk|pyruvate	28;1	28;1	28;1	MSMEG_3227|pyk|pyruvate kinase|472 AA	2	28	28	28	23	28	24	27	26	23	26	28	26	27	23	28	24	27	26	23	26	28	26	27	23	28	24	27	26	23	26	28	26	27	68	68	68	50.988	472	472;231	0	323.31	By MS/MS	By MS/MS
MSMEG_3228|MSMEG_3228|acyl-CoA	MSMEG_3228|MSMEG_3228|acyl-CoA	2	2	2	MSMEG_3228|MSMEG_3228|acyl-CoA thioesterase II|287 AA	1	2	2	2	0	1	1	1	1	0	1	1	1	1	0	1	1	1	1	0	1	1	1	1	0	1	1	1	1	0	1	1	1	1	10.1	10.1	10.1	32.157	287	287	0	10.913		By matching
MSMEG_3229|MSMEG_3229|conserved	MSMEG_3229|MSMEG_3229|conserved	1	1	1	MSMEG_3229|MSMEG_3229|conserved hypothetical protein|264 AA	1	1	1	1	1	1	1	0	1	1	0	0	0	0	1	1	1	0	1	1	0	0	0	0	1	1	1	0	1	1	0	0	0	0	11	11	11	27.25	264	264	0	2.9532	By MS/MS	By MS/MS
MSMEG_3234|MSMEG_3234|integral	MSMEG_3234|MSMEG_3234|integral	2	2	2	MSMEG_3234|MSMEG_3234|integral membrane protein|191 AA	1	2	2	2	0	1	0	0	0	2	1	0	0	2	0	1	0	0	0	2	1	0	0	2	0	1	0	0	0	2	1	0	0	2	8.9	8.9	8.9	19.563	191	191	0	4.1141		By matching
MSMEG_3235|MSMEG_3235|ABC-type	MSMEG_3235|MSMEG_3235|ABC-type	13	13	13	MSMEG_3235|MSMEG_3235|ABC-type amino acid transport system, secreted component|295 AA	1	13	13	13	9	11	12	12	11	10	9	12	13	12	9	11	12	12	11	10	9	12	13	12	9	11	12	12	11	10	9	12	13	12	78.6	78.6	78.6	30.706	295	295	0	303.75	By MS/MS	By MS/MS
MSMEG_3238|MSMEG_3238|3-mercaptopyruvate	MSMEG_3238|MSMEG_3238|3-mercaptopyruvate	3	3	3	MSMEG_3238|MSMEG_3238|3-mercaptopyruvate sulfurtransferase|286 AA	1	3	3	3	2	2	2	2	2	2	2	3	2	3	2	2	2	2	2	2	2	3	2	3	2	2	2	2	2	2	2	3	2	3	22.4	22.4	22.4	29.63	286	286	0	98.455	By MS/MS	By MS/MS
MSMEG_3240|MSMEG_3240|DNA-binding	MSMEG_3240|MSMEG_3240|DNA-binding	7	7	7	MSMEG_3240|MSMEG_3240|DNA-binding response regulator, LuxR family protein|219 AA	1	7	7	7	5	6	5	6	7	5	7	6	6	6	5	6	5	6	7	5	7	6	6	6	5	6	5	6	7	5	7	6	6	6	52.5	52.5	52.5	23.398	219	219	0	121.61	By MS/MS	By MS/MS
MSMEG_3242|MSMEG_3242|starvation-inducible	MSMEG_3242|MSMEG_3242|starvation-inducible	1	1	1	MSMEG_3242|MSMEG_3242|starvation-inducible DNA-binding protein or fine tangled pili major subunit|161 AA	1	1	1	1	0	0	0	0	0	0	0	0	1	0	0	0	0	0	0	0	0	0	1	0	0	0	0	0	0	0	0	0	1	0	8.1	8.1	8.1	17.833	161	161	0.0066905	2.0312
MSMEG_3244|MSMEG_3244|hypothetical	MSMEG_3244|MSMEG_3244|hypothetical	3	3	3	MSMEG_3244|MSMEG_3244|hypothetical protein|474 AA	1	3	3	3	2	2	3	3	3	2	3	3	3	2	2	2	3	3	3	2	3	3	3	2	2	2	3	3	3	2	3	3	3	2	9.9	9.9	9.9	48.645	474	474	0	28.403	By MS/MS	By MS/MS
MSMEG_3246|MSMEG_3246|response	MSMEG_3246|MSMEG_3246|response	9	9	9	MSMEG_3246|MSMEG_3246|response regulator|208 AA	1	9	9	9	6	8	6	7	7	7	6	7	7	7	6	8	6	7	7	7	6	7	7	7	6	8	6	7	7	7	6	7	7	7	56.2	56.2	56.2	23.173	208	208	0	123.62	By MS/MS	By MS/MS
MSMEG_3247|MSMEG_3247|branched-chain	MSMEG_3247|MSMEG_3247|branched-chain	16	16	16	MSMEG_3247|MSMEG_3247|branched-chain amino acid ABC transporter substrate-binding protein|387 AA	1	16	16	16	16	16	16	15	16	16	16	15	16	16	16	16	16	15	16	16	16	15	16	16	16	16	16	15	16	16	16	15	16	16	62.8	62.8	62.8	40.502	387	387	0	323.31	By MS/MS	By MS/MS
MSMEG_3253|MSMEG_3253|conserved	MSMEG_3253|MSMEG_3253|conserved	3	3	3	MSMEG_3253|MSMEG_3253|conserved hypothetical protein|295 AA	1	3	3	3	2	1	3	3	3	3	3	2	2	3	2	1	3	3	3	3	3	2	2	3	2	1	3	3	3	3	3	2	2	3	13.2	13.2	13.2	31.953	295	295	0	3.6619	By matching	By matching
MSMEG_3254|MSMEG_3254|RDD	MSMEG_3254|MSMEG_3254|RDD	2	2	2	MSMEG_3254|MSMEG_3254|RDD family protein, putative|161 AA	1	2	2	2	0	1	0	1	1	1	1	1	1	2	0	1	0	1	1	1	1	1	1	2	0	1	0	1	1	1	1	1	1	2	12.4	12.4	12.4	16.922	161	161	0	3.4883		By matching
MSMEG_3255|MSMEG_3255|DoxX	MSMEG_3255|MSMEG_3255|DoxX	13	13	13	MSMEG_3255|MSMEG_3255|DoxX subfamily protein, putative|291 AA	1	13	13	13	9	11	8	4	8	10	10	7	8	7	9	11	8	4	8	10	10	7	8	7	9	11	8	4	8	10	10	7	8	7	50.2	50.2	50.2	30.33	291	291	0	32.789	By MS/MS	By MS/MS
MSMEG_3257|xylB|xylulokinase|462	MSMEG_3257|xylB|xylulokinase|462	18	18	18	MSMEG_3257|xylB|xylulokinase|462 AA	1	18	18	18	14	14	14	16	16	15	15	15	14	16	14	14	14	16	16	15	15	15	14	16	14	14	14	16	16	15	15	15	14	16	52.4	52.4	52.4	47.557	462	462	0	226.66	By MS/MS	By MS/MS
MSMEG_3259|MSMEG_3259|acyl-CoA	MSMEG_3259|MSMEG_3259|acyl-CoA	6	6	6	MSMEG_3259|MSMEG_3259|acyl-CoA dehydrogenase|406 AA	1	6	6	6	4	4	4	5	5	4	5	5	6	5	4	4	4	5	5	4	5	5	6	5	4	4	4	5	5	4	5	5	6	5	24.9	24.9	24.9	43.461	406	406	0	15.783	By MS/MS	By MS/MS
MSMEG_3261|MSMEG_3261|conserved	MSMEG_3261|MSMEG_3261|conserved	7	7	7	MSMEG_3261|MSMEG_3261|conserved hypothetical protein|282 AA	1	7	7	7	6	6	7	7	7	6	7	7	7	7	6	6	7	7	7	6	7	7	7	7	6	6	7	7	7	6	7	7	7	7	38.3	38.3	38.3	30.636	282	282	0	80.245	By MS/MS	By MS/MS
MSMEG_3262|MSMEG_3262|L-xylulose	MSMEG_3262|MSMEG_3262|L-xylulose	5	5	5	MSMEG_3262|MSMEG_3262|L-xylulose reductase|262 AA	1	5	5	5	4	4	5	4	4	3	4	3	4	3	4	4	5	4	4	3	4	3	4	3	4	4	5	4	4	3	4	3	4	3	19.8	19.8	19.8	26.841	262	262	0	29.114	By MS/MS	By matching
MSMEG_3265|MSMEG_3265|arabitol-phosphate	MSMEG_3265|MSMEG_3265|arabitol-phosphate	3	3	3	MSMEG_3265|MSMEG_3265|arabitol-phosphate dehydrogenase|362 AA	1	3	3	3	2	2	2	2	2	3	2	2	2	2	2	2	2	2	2	3	2	2	2	2	2	2	2	2	2	3	2	2	2	2	9.9	9.9	9.9	39.356	362	362	0	6.2089	By MS/MS	By MS/MS
MSMEG_3271|MSMEG_3271|dihydroxyacetone	MSMEG_3271|MSMEG_3271|dihydroxyacetone	1	1	1	MSMEG_3271|MSMEG_3271|dihydroxyacetone kinase|580 AA	1	1	1	1	0	0	0	0	0	0	1	0	0	0	0	0	0	0	0	0	1	0	0	0	0	0	0	0	0	0	1	0	0	0	3.8	3.8	3.8	59.698	580	580	0.0027236	2.3391
MSMEG_3272|MSMEG_3272|ribose	MSMEG_3272|MSMEG_3272|ribose	1	1	1	MSMEG_3272|MSMEG_3272|ribose 5-phosphate isomerase|153 AA	1	1	1	1	1	1	0	1	1	1	1	1	1	0	1	1	0	1	1	1	1	1	1	0	1	1	0	1	1	1	1	1	1	0	8.5	8.5	8.5	16.108	153	153	0.00046773	2.862	By matching	By MS/MS
MSMEG_3278|MSMEG_3278|conserved	MSMEG_3278|MSMEG_3278|conserved	3	3	3	MSMEG_3278|MSMEG_3278|conserved hypothetical protein|115 AA	1	3	3	3	1	2	3	2	3	2	1	3	2	3	1	2	3	2	3	2	1	3	2	3	1	2	3	2	3	2	1	3	2	3	35.7	35.7	35.7	12.796	115	115	0	34.116	By MS/MS	By MS/MS
MSMEG_3280|MSMEG_3280|polyamine-binding	MSMEG_3280|MSMEG_3280|polyamine-binding	9	9	9	MSMEG_3280|MSMEG_3280|polyamine-binding lipoprotein|397 AA	1	9	9	9	4	7	6	7	6	5	6	7	9	9	4	7	6	7	6	5	6	7	9	9	4	7	6	7	6	5	6	7	9	9	47.4	47.4	47.4	43.076	397	397	0	38.985	By MS/MS	By MS/MS
MSMEG_3281|MSMEG_3281|spermidine/putrescine	MSMEG_3281|MSMEG_3281|spermidine/putrescine	2	2	2	MSMEG_3281|MSMEG_3281|spermidine/putrescine ABC transporter ATP-binding subunit|422 AA	1	2	2	2	2	2	2	1	1	2	2	2	1	2	2	2	2	1	1	2	2	2	1	2	2	2	2	1	1	2	2	2	1	2	11.4	11.4	11.4	45.926	422	422	0	11.978	By MS/MS	By MS/MS
MSMEG_3284|MSMEG_3284|transcriptional	MSMEG_3284|MSMEG_3284|transcriptional	2	2	2	MSMEG_3284|MSMEG_3284|transcriptional regulator, MarR family protein|139 AA	1	2	2	2	2	2	2	2	2	2	1	2	2	2	2	2	2	2	2	2	1	2	2	2	2	2	2	2	2	2	1	2	2	2	20.9	20.9	20.9	15.597	139	139	0	7.2634	By MS/MS	By matching
MSMEG_3285|MSMEG_3285|3-isopropylmalate	MSMEG_3285|MSMEG_3285|3-isopropylmalate	3	3	3	MSMEG_3285|MSMEG_3285|3-isopropylmalate dehydrogenase|356 AA	1	3	3	3	0	1	1	2	1	1	2	1	1	1	0	1	1	2	1	1	2	1	1	1	0	1	1	2	1	1	2	1	1	1	11.8	11.8	11.8	37.759	356	356	0	4.7245		By MS/MS
MSMEG_3290|MSMEG_3290|regulatory	MSMEG_3290|MSMEG_3290|regulatory	3	3	3	MSMEG_3290|MSMEG_3290|regulatory protein|924 AA	1	3	3	3	1	3	1	3	2	2	3	3	3	2	1	3	1	3	2	2	3	3	3	2	1	3	1	3	2	2	3	3	3	2	6.1	6.1	6.1	96.799	924	924	0.0027223	2.3373	By matching	By MS/MS
MSMEG_3304|MSMEG_3304|succinate	MSMEG_3304|MSMEG_3304|succinate	3	3	3	MSMEG_3304|MSMEG_3304|succinate semialdehyde dehydrogenase|450 AA	1	3	3	3	2	3	2	3	3	3	1	2	3	3	2	3	2	3	3	3	1	2	3	3	2	3	2	3	3	3	1	2	3	3	9.6	9.6	9.6	46.415	450	450	0	18.974	By MS/MS	By MS/MS
MSMEG_3308|MSMEG_3308|universal	MSMEG_3308|MSMEG_3308|universal	4	4	4	MSMEG_3308|MSMEG_3308|universal stress protein family protein, putative|162 AA	1	4	4	4	4	4	4	4	4	4	4	4	4	4	4	4	4	4	4	4	4	4	4	4	4	4	4	4	4	4	4	4	4	4	30.9	30.9	30.9	17.098	162	162	0	34.269	By MS/MS	By MS/MS
MSMEG_3309|MSMEG_3309|conserved	MSMEG_3309|MSMEG_3309|conserved	7	7	7	MSMEG_3309|MSMEG_3309|conserved hypothetical protein|433 AA	1	7	7	7	5	5	5	6	7	5	6	7	7	7	5	5	5	6	7	5	6	7	7	7	5	5	5	6	7	5	6	7	7	7	30.9	30.9	30.9	45.719	433	433	0	82.977	By MS/MS	By MS/MS
MSMEG_3317|dapB|dihydrodipicolinate	MSMEG_3317|dapB|dihydrodipicolinate	5	5	5	MSMEG_3317|dapB|dihydrodipicolinate reductase, N-terminus domain protein|340 AA	1	5	5	5	3	4	2	4	5	4	5	4	5	5	3	4	2	4	5	4	5	4	5	5	3	4	2	4	5	4	5	4	5	5	21.8	21.8	21.8	36.524	340	340	0	15.31	By MS/MS	By MS/MS
MSMEG_3319|MSMEG_3319|repressor	MSMEG_3319|MSMEG_3319|repressor	1	1	1	MSMEG_3319|MSMEG_3319|repressor protein|193 AA	1	1	1	1	0	0	1	1	0	1	0	0	1	0	0	0	1	1	0	1	0	0	1	0	0	0	1	1	0	1	0	0	1	0	8.8	8.8	8.8	21.401	193	193	0	5.9324
MSMEG_3328|MSMEG_3328|hypothetical	MSMEG_3328|MSMEG_3328|hypothetical	2	2	2	MSMEG_3328|MSMEG_3328|hypothetical protein|133 AA	1	2	2	2	1	2	2	1	1	2	2	2	2	2	1	2	2	1	1	2	2	2	2	2	1	2	2	1	1	2	2	2	2	2	22.6	22.6	22.6	14.853	133	133	0	46.123	By matching	By MS/MS
MSMEG_3335|MSMEG_3335|transcriptional	MSMEG_3335|MSMEG_3335|transcriptional	1	1	1	MSMEG_3335|MSMEG_3335|transcriptional regulator, IclR family protein, putative|269 AA	1	1	1	1	1	0	1	1	1	0	1	0	0	1	1	0	1	1	1	0	1	0	0	1	1	0	1	1	1	0	1	0	0	1	3	3	3	28.472	269	269	0.0096407	1.8541	By MS/MS
MSMEG_3345|MSMEG_3345|transcriptional	MSMEG_3345|MSMEG_3345|transcriptional	1	1	1	MSMEG_3345|MSMEG_3345|transcriptional regulator, GntR family protein|231 AA	1	1	1	1	1	1	1	1	1	1	1	1	1	1	1	1	1	1	1	1	1	1	1	1	1	1	1	1	1	1	1	1	1	1	3.5	3.5	3.5	26.147	231	231	0.00794	1.9046	By matching	By matching
MSMEG_3347|MSMEG_3347|nitrilase/cyanide	MSMEG_3347|MSMEG_3347|nitrilase/cyanide	4	4	4	MSMEG_3347|MSMEG_3347|nitrilase/cyanide hydratase and apolipoprotein N-acyltransferase|265 AA	1	4	4	4	3	4	3	4	4	4	4	4	4	4	3	4	3	4	4	4	4	4	4	4	3	4	3	4	4	4	4	4	4	4	18.5	18.5	18.5	28.245	265	265	0	40.213	By MS/MS	By MS/MS
MSMEG_3349|MSMEG_3349|trap	MSMEG_3349|MSMEG_3349|trap	2	2	2	MSMEG_3349|MSMEG_3349|trap dicarboxylate transporter, dctq subunit, putative|172 AA	1	2	2	2	2	2	2	2	2	1	2	0	0	1	2	2	2	2	2	1	2	0	0	1	2	2	2	2	2	1	2	0	0	1	10.5	10.5	10.5	18.776	172	172	0.005814	2.0792	By matching	By matching
MSMEG_3357|MSMEG_3357|metal-dependent	MSMEG_3357|MSMEG_3357|metal-dependent	3	3	3	MSMEG_3357|MSMEG_3357|metal-dependent phosphohydrolase, HD subdomain|188 AA	1	3	3	3	2	3	2	3	2	3	2	2	2	2	2	3	2	3	2	3	2	2	2	2	2	3	2	3	2	3	2	2	2	2	22.3	22.3	22.3	21.503	188	188	0	11.443	By MS/MS	By matching
MSMEG_3363|MSMEG_3363|regulatory	MSMEG_3363|MSMEG_3363|regulatory	1	1	1	MSMEG_3363|MSMEG_3363|regulatory protein, TetR|200 AA	1	1	1	1	1	1	1	0	1	1	1	1	1	0	1	1	1	0	1	1	1	1	1	0	1	1	1	0	1	1	1	1	1	0	5	5	5	21.923	200	200	0.0096322	1.8509	By matching	By MS/MS
MSMEG_3372|MSMEG_3372|transcriptional	MSMEG_3372|MSMEG_3372|transcriptional	2	2	2	MSMEG_3372|MSMEG_3372|transcriptional regulator, ArsR family protein|112 AA	1	2	2	2	1	1	2	2	2	1	1	2	1	2	1	1	2	2	2	1	1	2	1	2	1	1	2	2	2	1	1	2	1	2	35.7	35.7	35.7	12.17	112	112	0	5.4747	By MS/MS	By matching
MSMEG_3376|MSMEG_3376|beta-lactamase|304	MSMEG_3376|MSMEG_3376|beta-lactamase|304	2	2	2	MSMEG_3376|MSMEG_3376|beta-lactamase|304 AA	1	2	2	2	1	1	1	2	2	1	1	2	1	2	1	1	1	2	2	1	1	2	1	2	1	1	1	2	2	1	1	2	1	2	13.2	13.2	13.2	33.846	304	304	0.0013876	2.7262	By matching	By matching
MSMEG_3379|MSMEG_3379|2-deoxy-D-gluconate	MSMEG_3379|MSMEG_3379|2-deoxy-D-gluconate	2	2	2	MSMEG_3379|MSMEG_3379|2-deoxy-D-gluconate 3-dehydrogenase|261 AA	1	2	2	2	0	1	1	2	0	0	1	0	2	1	0	1	1	2	0	0	1	0	2	1	0	1	1	2	0	0	1	0	2	1	12.3	12.3	12.3	27.46	261	261	0	29.249		By matching
MSMEG_3380|MSMEG_3380|pyridoxamine	MSMEG_3380|MSMEG_3380|pyridoxamine	4	4	4	MSMEG_3380|MSMEG_3380|pyridoxamine 5-phosphate oxidase-related, FMN-binding|129 AA	1	4	4	4	4	3	4	4	4	4	4	4	4	4	4	3	4	4	4	4	4	4	4	4	4	3	4	4	4	4	4	4	4	4	38.8	38.8	38.8	14.63	129	129	0	49.024	By MS/MS	By MS/MS
MSMEG_3381|MSMEG_3381|acyl	MSMEG_3381|MSMEG_3381|acyl	2	2	2	MSMEG_3381|MSMEG_3381|acyl carrier protein phosphodiesterase|205 AA	1	2	2	2	2	2	2	2	2	1	2	1	2	2	2	2	2	2	2	1	2	1	2	2	2	2	2	2	2	1	2	1	2	2	15.1	15.1	15.1	22.272	205	205	0	4.6527	By MS/MS	By MS/MS
MSMEG_3400|MSMEG_3400|glutamyl-tRNA(Gln)	MSMEG_3400|MSMEG_3400|glutamyl-tRNA(Gln)	3	3	3	MSMEG_3400|MSMEG_3400|glutamyl-tRNA(Gln) amidotransferase subunit A|732 AA	1	3	3	3	1	0	0	1	3	1	2	2	3	0	1	0	0	1	3	1	2	2	3	0	1	0	0	1	3	1	2	2	3	0	8.7	8.7	8.7	79.999	732	732	0	8.7321	By matching
MSMEG_3411|MSMEG_3411|MOSC	MSMEG_3411|MSMEG_3411|MOSC	2	2	2	MSMEG_3411|MSMEG_3411|MOSC domain protein|145 AA	1	2	2	2	2	1	1	2	1	2	2	1	1	1	2	1	1	2	1	2	2	1	1	1	2	1	1	2	1	2	2	1	1	1	13.8	13.8	13.8	15.51	145	145	0.00046882	2.8948	By matching	By matching
MSMEG_3418|MSMEG_3418|conserved	MSMEG_3418|MSMEG_3418|conserved	2	2	2	MSMEG_3418|MSMEG_3418|conserved hypothetical protein|142 AA	1	2	2	2	2	2	2	2	2	2	2	2	2	2	2	2	2	2	2	2	2	2	2	2	2	2	2	2	2	2	2	2	2	2	14.8	14.8	14.8	15.481	142	142	0	11.936	By matching	By MS/MS
MSMEG_3419|MSMEG_3419|hypothetical	MSMEG_3419|MSMEG_3419|hypothetical	14	14	14	MSMEG_3419|MSMEG_3419|hypothetical protein|320 AA	1	14	14	14	12	14	12	13	13	13	13	13	14	14	12	14	12	13	13	13	13	13	14	14	12	14	12	13	13	13	13	13	14	14	58.8	58.8	58.8	34.155	320	320	0	206.94	By MS/MS	By MS/MS
MSMEG_3422|MSMEG_3422|D-isomer	MSMEG_3422|MSMEG_3422|D-isomer	6	6	6	MSMEG_3422|MSMEG_3422|D-isomer specific 2-hydroxyacid dehydrogenase, NAD-binding|343 AA	1	6	6	6	3	4	2	5	4	4	5	5	5	5	3	4	2	5	4	4	5	5	5	5	3	4	2	5	4	4	5	5	5	5	34.1	34.1	34.1	37.219	343	343	0	32.771	By MS/MS	By MS/MS
MSMEG_3426|MSMEG_3426|short	MSMEG_3426|MSMEG_3426|short	3	3	3	MSMEG_3426|MSMEG_3426|short chain dehydrogenase|283 AA	1	3	3	3	1	1	1	2	1	2	2	0	1	0	1	1	1	2	1	2	2	0	1	0	1	1	1	2	1	2	2	0	1	0	13.4	13.4	13.4	29.89	283	283	0	7.8819	By MS/MS	By MS/MS
MSMEG_3430|MSMEG_3430|SAM-dependent	MSMEG_3430|MSMEG_3430|SAM-dependent	9	9	9	MSMEG_3430|MSMEG_3430|SAM-dependent methyltransferase|201 AA	1	9	9	9	5	8	7	8	7	6	7	8	8	8	5	8	7	8	7	6	7	8	8	8	5	8	7	8	7	6	7	8	8	8	62.2	62.2	62.2	21.706	201	201	0	50.434	By MS/MS	By MS/MS
MSMEG_3434|MSMEG_3434|peptidyl-prolyl	MSMEG_3434|MSMEG_3434|peptidyl-prolyl	4	4	4	MSMEG_3434|MSMEG_3434|peptidyl-prolyl cis-trans isomerase, fkbp-type domain protein|209 AA	1	4	4	4	3	4	4	4	4	4	3	3	4	4	3	4	4	4	4	4	3	3	4	4	3	4	4	4	4	4	3	3	4	4	45.5	45.5	45.5	20.355	209	209	0	80.492	By MS/MS	By MS/MS
MSMEG_3435|MSMEG_3435|conserved	MSMEG_3435|MSMEG_3435|conserved	2	2	2	MSMEG_3435|MSMEG_3435|conserved hypothetical protein|130 AA	1	2	2	2	2	2	2	2	2	2	2	2	2	2	2	2	2	2	2	2	2	2	2	2	2	2	2	2	2	2	2	2	2	2	23.1	23.1	23.1	13.841	130	130	0	18.248	By MS/MS	By MS/MS
MSMEG_3440|sdaA|L-serine	MSMEG_3440|sdaA|L-serine	3	3	3	MSMEG_3440|sdaA|L-serine ammonia-lyase|458 AA	1	3	3	3	2	3	2	3	2	2	3	2	3	3	2	3	2	3	2	2	3	2	3	3	2	3	2	3	2	2	3	2	3	3	7.6	7.6	7.6	48.301	458	458	0	12.255	By matching	By matching
MSMEG_3443|MSMEG_3443|hypothetical	MSMEG_3443|MSMEG_3443|hypothetical	1	1	1	MSMEG_3443|MSMEG_3443|hypothetical protein|52 AA	1	1	1	1	0	1	0	0	0	0	1	1	0	0	0	1	0	0	0	0	1	1	0	0	0	1	0	0	0	0	1	1	0	0	50	50	50	5.3675	52	52	0	5.8004		By MS/MS
MSMEG_3450|dehII|haloacid	MSMEG_3450|dehII|haloacid	1	1	1	MSMEG_3450|dehII|haloacid dehalogenase, type II|231 AA	1	1	1	1	1	1	0	1	1	1	1	0	1	1	1	1	0	1	1	1	1	0	1	1	1	1	0	1	1	1	1	0	1	1	3	3	3	25.35	231	231	0.0066607	1.9952	By MS/MS	By MS/MS
MSMEG_3451|MSMEG_3451|short-chain	MSMEG_3451|MSMEG_3451|short-chain	1	1	1	MSMEG_3451|MSMEG_3451|short-chain dehydrogenase/reductase|283 AA	1	1	1	1	1	1	1	1	1	1	1	1	1	1	1	1	1	1	1	1	1	1	1	1	1	1	1	1	1	1	1	1	1	1	3.5	3.5	3.5	30.501	283	283	0.0070891	1.9652	By MS/MS	By matching
MSMEG_3461|katG|catalase/peroxidase	MSMEG_3461|katG|catalase/peroxidase	30	30	30	MSMEG_3461|katG|catalase/peroxidase HPI|748 AA	1	30	30	30	23	27	26	29	28	28	29	27	29	28	23	27	26	29	28	28	29	27	29	28	23	27	26	29	28	28	29	27	29	28	57.2	57.2	57.2	81.997	748	748	0	323.31	By MS/MS	By MS/MS
MSMEG_3464|MSMEG_3464|alcohol	MSMEG_3464|MSMEG_3464|alcohol	2	2	2	MSMEG_3464|MSMEG_3464|alcohol dehydrogenase|338 AA	1	2	2	2	0	0	1	1	1	0	1	0	2	1	0	0	1	1	1	0	1	0	2	1	0	0	1	1	1	0	1	0	2	1	16	16	16	34.534	338	338	0	6.2984
MSMEG_3465|MSMEG_3465|acyl-CoA	MSMEG_3465|MSMEG_3465|acyl-CoA	12	12	12	MSMEG_3465|MSMEG_3465|acyl-CoA synthase|619 AA	1	12	12	12	6	8	11	11	10	7	9	10	9	9	6	8	11	11	10	7	9	10	9	9	6	8	11	11	10	7	9	10	9	9	32.8	32.8	32.8	65.801	619	619	0	107.61	By MS/MS	By MS/MS
MSMEG_3467|MSMEG_3467|conserved	MSMEG_3467|MSMEG_3467|conserved	2	2	2	MSMEG_3467|MSMEG_3467|conserved hypothetical protein|136 AA	1	2	2	2	2	2	2	1	1	1	1	1	1	1	2	2	2	1	1	1	1	1	1	1	2	2	2	1	1	1	1	1	1	1	30.9	30.9	30.9	14.533	136	136	0.0018257	2.459	By matching	By matching
MSMEG_3470|MSMEG_3470|NAD-dependent	MSMEG_3470|MSMEG_3470|NAD-dependent	3	3	3	MSMEG_3470|MSMEG_3470|NAD-dependent epimerase/dehydratase|303 AA	1	3	3	3	2	2	2	2	1	1	2	0	2	1	2	2	2	2	1	1	2	0	2	1	2	2	2	2	1	1	2	0	2	1	11.2	11.2	11.2	31.081	303	303	0	4.476	By MS/MS	By matching
MSMEG_3472|MSMEG_3472|conserved	MSMEG_3472|MSMEG_3472|conserved	3	3	3	MSMEG_3472|MSMEG_3472|conserved hypothetical protein|399 AA	1	3	3	3	2	2	2	1	1	1	1	2	3	3	2	2	2	1	1	1	1	2	3	3	2	2	2	1	1	1	1	2	3	3	10.3	10.3	10.3	43.052	399	399	0	7.0759	By MS/MS	By matching
MSMEG_3477|MSMEG_3477|possible	MSMEG_3477|MSMEG_3477|possible	3	3	3	MSMEG_3477|MSMEG_3477|possible inv protein|220 AA	1	3	3	3	3	3	3	3	3	3	3	3	3	3	3	3	3	3	3	3	3	3	3	3	3	3	3	3	3	3	3	3	3	3	15.5	15.5	15.5	22.27	220	220	0	25.285	By MS/MS	By MS/MS
MSMEG_3478|MSMEG_3478|tena/thi-4	MSMEG_3478|MSMEG_3478|tena/thi-4	1	1	1	MSMEG_3478|MSMEG_3478|tena/thi-4 family protein|243 AA	1	1	1	1	1	0	1	1	1	1	1	1	1	1	1	0	1	1	1	1	1	1	1	1	1	0	1	1	1	1	1	1	1	1	6.2	6.2	6.2	27.05	243	243	0	34.512	By matching
MSMEG_3479|MSMEG_3479|thiol	MSMEG_3479|MSMEG_3479|thiol	8	8	8	MSMEG_3479|MSMEG_3479|thiol peroxidase|164 AA	1	8	8	8	6	8	7	7	7	7	6	7	7	7	6	8	7	7	7	7	6	7	7	7	6	8	7	7	7	7	6	7	7	7	90.9	90.9	90.9	16.832	164	164	0	315.6	By MS/MS	By MS/MS
MSMEG_3481|MSMEG_3481|O-succinylbenzoate	MSMEG_3481|MSMEG_3481|O-succinylbenzoate	1	1	1	MSMEG_3481|MSMEG_3481|O-succinylbenzoate synthase|350 AA	1	1	1	1	0	0	0	0	0	0	0	0	1	0	0	0	0	0	0	0	0	0	1	0	0	0	0	0	0	0	0	0	1	0	4.9	4.9	4.9	36.54	350	350	0	3.136
MSMEG_3482|MSMEG_3482|hypothetical	MSMEG_3482|MSMEG_3482|hypothetical	2	2	2	MSMEG_3482|MSMEG_3482|hypothetical protein|84 AA	1	2	2	2	1	2	2	2	2	2	2	2	2	2	1	2	2	2	2	2	2	2	2	2	1	2	2	2	2	2	2	2	2	2	29.8	29.8	29.8	8.3747	84	84	0	6.2273	By MS/MS	By MS/MS
MSMEG_3489|MSMEG_3489|conserved	MSMEG_3489|MSMEG_3489|conserved	8	8	8	MSMEG_3489|MSMEG_3489|conserved hypothetical protein, putative|228 AA	1	8	8	8	6	8	7	8	8	7	8	8	7	8	6	8	7	8	8	7	8	8	7	8	6	8	7	8	8	7	8	8	7	8	49.6	49.6	49.6	24.314	228	228	0	57.13	By MS/MS	By MS/MS
MSMEG_3491|MSMEG_3491|conserved	MSMEG_3491|MSMEG_3491|conserved	4	4	4	MSMEG_3491|MSMEG_3491|conserved hypothetical protein|166 AA	1	4	4	4	3	3	4	4	2	3	4	3	3	3	3	3	4	4	2	3	4	3	3	3	3	3	4	4	2	3	4	3	3	3	43.4	43.4	43.4	16.857	166	166	0	30.998	By MS/MS	By MS/MS
MSMEG_3492|MSMEG_3492|phosphodiesterase|384	MSMEG_3492|MSMEG_3492|phosphodiesterase|384	7	7	7	MSMEG_3492|MSMEG_3492|phosphodiesterase|384 AA	1	7	7	7	6	7	6	6	7	7	7	6	6	6	6	7	6	6	7	7	7	6	6	6	6	7	6	6	7	7	7	6	6	6	24.5	24.5	24.5	39.718	384	384	0	33.767	By MS/MS	By MS/MS
MSMEG_3493|MSMEG_3493|putative	MSMEG_3493|MSMEG_3493|putative	5	5	5	MSMEG_3493|MSMEG_3493|putative secreted protein|113 AA	1	5	5	5	4	5	4	4	4	4	4	4	4	4	4	5	4	4	4	4	4	4	4	4	4	5	4	4	4	4	4	4	4	4	51.3	51.3	51.3	12.234	113	113	0	80.962	By MS/MS	By MS/MS
MSMEG_3494|MSMEG_3494|putative	MSMEG_3494|MSMEG_3494|putative	3	3	3	MSMEG_3494|MSMEG_3494|putative secreted protein|153 AA	1	3	3	3	3	2	2	3	3	3	3	3	3	3	3	2	2	3	3	3	3	3	3	3	3	2	2	3	3	3	3	3	3	3	29.4	29.4	29.4	17.534	153	153	0	30.367	By MS/MS	By MS/MS
MSMEG_3495|MSMEG_3495|MmpS5	MSMEG_3495|MSMEG_3495|MmpS5	2	2	1	MSMEG_3495|MSMEG_3495|MmpS5 protein|158 AA	1	2	2	1	2	1	1	1	2	2	1	2	1	2	2	1	1	1	2	2	1	2	1	2	1	0	0	0	1	1	1	1	0	1	26.6	26.6	17.1	17.194	158	158	0	10.543	By MS/MS	By MS/MS
MSMEG_3500|MSMEG_3500|conserved	MSMEG_3500|MSMEG_3500|conserved	5	5	5	MSMEG_3500|MSMEG_3500|conserved hypothetical protein|248 AA	1	5	5	5	3	3	4	5	5	5	5	4	4	3	3	3	4	5	5	5	5	4	4	3	3	3	4	5	5	5	5	4	4	3	26.2	26.2	26.2	26.536	248	248	0	11.784	By MS/MS	By MS/MS
MSMEG_3505|MSMEG_3505|6-aminohexanoate-cyclic-dimer	MSMEG_3505|MSMEG_3505|6-aminohexanoate-cyclic-dimer	8	8	8	MSMEG_3505|MSMEG_3505|6-aminohexanoate-cyclic-dimer hydrolase|490 AA	1	8	8	8	5	6	6	6	5	5	5	8	6	7	5	6	6	6	5	5	5	8	6	7	5	6	6	6	5	5	5	8	6	7	31.8	31.8	31.8	50.072	490	490	0	60.495	By MS/MS	By MS/MS
MSMEG_3507|MSMEG_3507|fructose-bisphosphate	MSMEG_3507|MSMEG_3507|fructose-bisphosphate	24	24	24	MSMEG_3507|MSMEG_3507|fructose-bisphosphate aldolase class-I|297 AA	1	24	24	24	22	24	23	24	24	22	21	23	24	23	22	24	23	24	24	22	21	23	24	23	22	24	23	24	24	22	21	23	24	23	88.9	88.9	88.9	31.925	297	297	0	323.31	By MS/MS	By MS/MS
MSMEG_3512|MSMEG_3512|competence	MSMEG_3512|MSMEG_3512|competence	7	7	7	MSMEG_3512|MSMEG_3512|competence damage-inducible protein A|430 AA	1	7	7	7	4	6	5	5	5	5	4	5	5	7	4	6	5	5	5	5	4	5	5	7	4	6	5	5	5	5	4	5	5	7	20.2	20.2	20.2	45.459	430	430	0	55.875	By MS/MS	By MS/MS
MSMEG_3513|MSMEG_3513|enhanced	MSMEG_3513|MSMEG_3513|enhanced	6	6	6	MSMEG_3513|MSMEG_3513|enhanced intracellular survival protein|402 AA	1	6	6	6	4	4	4	4	4	5	5	6	6	6	4	4	4	4	4	5	5	6	6	6	4	4	4	4	4	5	5	6	6	6	19.9	19.9	19.9	43.909	402	402	0	19.537	By MS/MS	By MS/MS
MSMEG_3514|MSMEG_3514|hypothetical	MSMEG_3514|MSMEG_3514|hypothetical	2	2	2	MSMEG_3514|MSMEG_3514|hypothetical protein|75 AA	1	2	2	2	2	2	2	2	2	2	2	2	2	2	2	2	2	2	2	2	2	2	2	2	2	2	2	2	2	2	2	2	2	2	24	24	24	8.8128	75	75	0	7.1328	By matching	By MS/MS
MSMEG_3515|MSMEG_3515|3-alpha-(or	MSMEG_3515|MSMEG_3515|3-alpha-(or	3	3	3	MSMEG_3515|MSMEG_3515|3-alpha-(or 20-beta)-hydroxysteroid dehydrogenase|245 AA	1	3	3	3	0	2	1	1	1	1	2	2	0	2	0	2	1	1	1	1	2	2	0	2	0	2	1	1	1	1	2	2	0	2	14.7	14.7	14.7	25.488	245	245	0	4.9539		By MS/MS
MSMEG_3528|MSMEG_3528|ErfK/YbiS/YcfS/YnhG	MSMEG_3528|MSMEG_3528|ErfK/YbiS/YcfS/YnhG	2	2	2	MSMEG_3528|MSMEG_3528|ErfK/YbiS/YcfS/YnhG family protein|259 AA	1	2	2	2	0	0	0	1	0	0	1	0	0	1	0	0	0	1	0	0	1	0	0	1	0	0	0	1	0	0	1	0	0	1	16.6	16.6	16.6	27.228	259	259	0.0075055	1.9169
MSMEG_3532|MSMEG_3532|serine/threonine	MSMEG_3532|MSMEG_3532|serine/threonine	6	6	6	MSMEG_3532|MSMEG_3532|serine/threonine dehydratase family protein|316 AA	1	6	6	6	4	6	5	6	6	5	3	5	5	5	4	6	5	6	6	5	3	5	5	5	4	6	5	6	6	5	3	5	5	5	33.2	33.2	33.2	32.788	316	316	0	56.548	By MS/MS	By MS/MS
MSMEG_3538|MSMEG_3538|cyclopropane-fatty-acyl-phospholipid	MSMEG_3538|MSMEG_3538|cyclopropane-fatty-acyl-phospholipid	4	4	4	MSMEG_3538|MSMEG_3538|cyclopropane-fatty-acyl-phospholipid synthase 1|286 AA	1	4	4	4	3	2	2	3	3	2	4	4	3	3	3	2	2	3	3	2	4	4	3	3	3	2	2	3	3	2	4	4	3	3	15.4	15.4	15.4	32.964	286	286	0	12.61	By MS/MS	By matching
MSMEG_3540|MSMEG_3540|conserved	MSMEG_3540|MSMEG_3540|conserved	5	5	5	MSMEG_3540|MSMEG_3540|conserved hypothetical protein|73 AA	1	5	5	5	5	5	5	5	4	5	4	5	5	4	5	5	5	5	4	5	4	5	5	4	5	5	5	5	4	5	4	5	5	4	98.6	98.6	98.6	8.0745	73	73	0	107.9	By MS/MS	By MS/MS
MSMEG_3542|MSMEG_3542|conserved	MSMEG_3542|MSMEG_3542|conserved	1	1	1	MSMEG_3542|MSMEG_3542|conserved hypothetical protein|123 AA	1	1	1	1	0	0	0	0	0	1	0	0	0	0	0	0	0	0	0	1	0	0	0	0	0	0	0	0	0	1	0	0	0	0	17.9	17.9	17.9	13.446	123	123	0	6.9915
MSMEG_3543|MSMEG_3543|soluble	MSMEG_3543|MSMEG_3543|soluble	6	6	6	MSMEG_3543|MSMEG_3543|soluble secreted antigen MPT53|176 AA	1	6	6	6	4	6	4	4	5	4	5	4	4	4	4	6	4	4	5	4	5	4	4	4	4	6	4	4	5	4	5	4	4	4	46	46	46	18.52	176	176	0	63.216	By MS/MS	By MS/MS
MSMEG_3560|MSMEG_3560|conserved	MSMEG_3560|MSMEG_3560|conserved	5	5	5	MSMEG_3560|MSMEG_3560|conserved hypothetical protein|120 AA	1	5	5	5	2	4	4	2	4	5	4	5	5	5	2	4	4	2	4	5	4	5	5	5	2	4	4	2	4	5	4	5	5	5	47.5	47.5	47.5	13.356	120	120	0	13.127	By matching	By MS/MS
MSMEG_3564|bfr|bacterioferritin|161	MSMEG_3564|bfr|bacterioferritin|161	8	8	8	MSMEG_3564|bfr|bacterioferritin|161 AA	1	8	8	8	6	8	7	8	8	7	8	8	8	8	6	8	7	8	8	7	8	8	8	8	6	8	7	8	8	7	8	8	8	8	72.7	72.7	72.7	18.482	161	161	0	54.813	By MS/MS	By MS/MS
MSMEG_3569|MSMEG_3569|conserved	MSMEG_3569|MSMEG_3569|conserved	2	2	2	MSMEG_3569|MSMEG_3569|conserved hypothetical protein|247 AA	1	2	2	2	2	2	2	2	2	2	2	2	2	2	2	2	2	2	2	2	2	2	2	2	2	2	2	2	2	2	2	2	2	2	10.5	10.5	10.5	26.63	247	247	0	10.205	By MS/MS	By MS/MS
MSMEG_3574|MSMEG_3574|TPR	MSMEG_3574|MSMEG_3574|TPR	13	13	13	MSMEG_3574|MSMEG_3574|TPR domain protein|533 AA	1	13	13	13	9	10	10	11	10	8	10	12	12	10	9	10	10	11	10	8	10	12	12	10	9	10	10	11	10	8	10	12	12	10	35.8	35.8	35.8	58.765	533	533	0	60.753	By MS/MS	By MS/MS
MSMEG_3575|MSMEG_3575|cytidine/deoxycytidylate	MSMEG_3575|MSMEG_3575|cytidine/deoxycytidylate	1	1	1	MSMEG_3575|MSMEG_3575|cytidine/deoxycytidylate deaminase, zinc-binding region|159 AA	1	1	1	1	1	1	0	0	0	1	1	0	0	0	1	1	0	0	0	1	1	0	0	0	1	1	0	0	0	1	1	0	0	0	16.4	16.4	16.4	17.241	159	159	0.0040577	2.2433	By MS/MS	By MS/MS
MSMEG_3576|MSMEG_3576|alpha-amylase	MSMEG_3576|MSMEG_3576|alpha-amylase	4	4	4	MSMEG_3576|MSMEG_3576|alpha-amylase 3|435 AA	1	4	4	4	2	2	2	4	2	2	4	4	3	3	2	2	2	4	2	2	4	4	3	3	2	2	2	4	2	2	4	4	3	3	12.4	12.4	12.4	48.148	435	435	0	8.988	By MS/MS	By matching
MSMEG_3580|MSMEG_3580|antigen	MSMEG_3580|MSMEG_3580|antigen	4	4	4	MSMEG_3580|MSMEG_3580|antigen 85-C|329 AA	1	4	4	4	1	2	0	3	3	2	2	2	3	3	1	2	0	3	3	2	2	2	3	3	1	2	0	3	3	2	2	2	3	3	25.8	25.8	25.8	35.915	329	329	0	28.05	By MS/MS	By matching
MSMEG_3594|MSMEG_3594|anthranilate	MSMEG_3594|MSMEG_3594|anthranilate	10	10	10	MSMEG_3594|MSMEG_3594|anthranilate dioxygenase reductase|409 AA	1	10	10	10	6	8	6	8	8	9	10	10	9	10	6	8	6	8	8	9	10	10	9	10	6	8	6	8	8	9	10	10	9	10	43.3	43.3	43.3	42.973	409	409	0	40.136	By MS/MS	By MS/MS
MSMEG_3595|MSMEG_3595|conserved	MSMEG_3595|MSMEG_3595|conserved	8	8	8	MSMEG_3595|MSMEG_3595|conserved hypothetical protein|222 AA	1	8	8	8	6	6	8	8	8	7	7	8	7	8	6	6	8	8	8	7	7	8	7	8	6	6	8	8	8	7	7	8	7	8	55.4	55.4	55.4	23.811	222	222	0	41.034	By MS/MS	By MS/MS
MSMEG_3596|MSMEG_3596|ATPase|1068	MSMEG_3596|MSMEG_3596|ATPase|1068	3	3	3	MSMEG_3596|MSMEG_3596|ATPase|1068 AA	1	3	3	3	1	0	2	1	1	0	0	0	1	2	1	0	2	1	1	0	0	0	1	2	1	0	2	1	1	0	0	0	1	2	4.1	4.1	4.1	115.29	1068	1068	0	6.7563	By matching
MSMEG_3598|MSMEG_3598|periplasmic	MSMEG_3598|MSMEG_3598|periplasmic	12	10	10	MSMEG_3598|MSMEG_3598|periplasmic sugar-binding proteins|349 AA	1	12	10	10	8	10	11	12	10	9	9	10	11	11	6	8	9	10	8	7	7	8	9	9	6	8	9	10	8	7	7	8	9	9	59.6	50.1	50.1	36.08	349	349	0	211.96	By MS/MS	By MS/MS
MSMEG_3599|MSMEG_3599|sugar-binding	MSMEG_3599|MSMEG_3599|sugar-binding	12	12	10	MSMEG_3599|MSMEG_3599|sugar-binding transcriptional regulator, LacI family protein|349 AA	1	12	12	10	11	11	11	11	11	11	11	11	11	12	11	11	11	11	11	11	11	11	11	12	9	9	9	9	9	9	9	9	9	10	54.7	54.7	45.3	36.35	349	349	0	264.64	By MS/MS	By MS/MS
MSMEG_3602|MSMEG_3602|ribose	MSMEG_3602|MSMEG_3602|ribose	5	5	5	MSMEG_3602|MSMEG_3602|ribose transport ATP-binding protein RbsA|512 AA	1	5	5	5	3	2	2	2	3	3	3	3	2	3	3	2	2	2	3	3	3	3	2	3	3	2	2	2	3	3	3	3	2	3	13.7	13.7	13.7	54.726	512	512	0	52.643	By MS/MS	By MS/MS
MSMEG_3603|MSMEG_3603|oxidoreductase,	MSMEG_3603|MSMEG_3603|oxidoreductase,	5	5	5	MSMEG_3603|MSMEG_3603|oxidoreductase, zinc-binding dehydrogenase family protein|348 AA	1	5	5	5	2	2	4	3	3	3	3	2	3	2	2	2	4	3	3	3	3	2	3	2	2	2	4	3	3	3	3	2	3	2	27.9	27.9	27.9	36.188	348	348	0	11.69	By MS/MS	By MS/MS
MSMEG_3604|MSMEG_3604|sorbitol	MSMEG_3604|MSMEG_3604|sorbitol	5	5	5	MSMEG_3604|MSMEG_3604|sorbitol utilization protein SOU2|255 AA	1	5	5	5	5	5	5	5	5	4	5	4	5	4	5	5	5	5	5	4	5	4	5	4	5	5	5	5	5	4	5	4	5	4	22.4	22.4	22.4	27.155	255	255	0	51.484	By MS/MS	By MS/MS
MSMEG_3605|MSMEG_3605|sorbitol	MSMEG_3605|MSMEG_3605|sorbitol	12	12	12	MSMEG_3605|MSMEG_3605|sorbitol dehydrogenase|346 AA	1	12	12	12	9	9	9	10	10	9	10	12	11	11	9	9	9	10	10	9	10	12	11	11	9	9	9	10	10	9	10	12	11	11	60.4	60.4	60.4	36.005	346	346	0	90.657	By MS/MS	By MS/MS
MSMEG_3607|MSMEG_3607|short	MSMEG_3607|MSMEG_3607|short	4	4	4	MSMEG_3607|MSMEG_3607|short chain dehydrogenase|260 AA	1	4	4	4	2	3	2	4	1	2	3	4	4	4	2	3	2	4	1	2	3	4	4	4	2	3	2	4	1	2	3	4	4	4	27.7	27.7	27.7	26.333	260	260	0	14.708	By MS/MS	By matching
MSMEG_3608|MSMEG_3608|acetyl-CoA	MSMEG_3608|MSMEG_3608|acetyl-CoA	7	7	7	MSMEG_3608|MSMEG_3608|acetyl-CoA acetyltransferase|488 AA	1	7	7	7	5	6	5	6	6	5	6	7	5	6	5	6	5	6	6	5	6	7	5	6	5	6	5	6	6	5	6	7	5	6	22.5	22.5	22.5	53.044	488	488	0	29.699	By MS/MS	By MS/MS
MSMEG_3609|MSMEG_3609|hydride	MSMEG_3609|MSMEG_3609|hydride	7	7	7	MSMEG_3609|MSMEG_3609|hydride transferase 1|327 AA	1	7	7	7	4	6	4	6	5	5	6	6	6	5	4	6	4	6	5	5	6	6	6	5	4	6	4	6	5	5	6	6	6	5	37	37	37	34.434	327	327	0	48.195	By MS/MS	By MS/MS
MSMEG_3618|MSMEG_3618|alanine	MSMEG_3618|MSMEG_3618|alanine	7	7	7	MSMEG_3618|MSMEG_3618|alanine and proline-rich secreted protein apa|353 AA	1	7	7	7	7	6	7	7	7	7	7	7	7	7	7	6	7	7	7	7	7	7	7	7	7	6	7	7	7	7	7	7	7	7	41.6	41.6	41.6	35.568	353	353	0	205.71	By MS/MS	By MS/MS
MSMEG_3619|MSMEG_3619|short	MSMEG_3619|MSMEG_3619|short	14	14	14	MSMEG_3619|MSMEG_3619|short chain dehydrogenase|223 AA	1	14	14	14	13	12	12	12	13	13	11	12	12	14	13	12	12	12	13	13	11	12	12	14	13	12	12	12	13	13	11	12	12	14	81.2	81.2	81.2	23.464	223	223	0	323.31	By MS/MS	By MS/MS
MSMEG_3620|MSMEG_3620|conserved	MSMEG_3620|MSMEG_3620|conserved	10	10	10	MSMEG_3620|MSMEG_3620|conserved hypothetical protein|309 AA	1	10	10	10	7	10	9	8	8	7	7	8	9	9	7	10	9	8	8	7	7	8	9	9	7	10	9	8	8	7	7	8	9	9	50.8	50.8	50.8	33.972	309	309	0	125.24	By MS/MS	By MS/MS
MSMEG_3621|ndh|NADH	MSMEG_3621|ndh|NADH	7	7	7	MSMEG_3621|ndh|NADH dehydrogenase|457 AA	1	7	7	7	6	6	6	6	7	6	6	6	7	7	6	6	6	6	7	6	6	6	7	7	6	6	6	6	7	6	6	6	7	7	23.6	23.6	23.6	48.98	457	457	0	85.968	By MS/MS	By MS/MS
MSMEG_3622|MSMEG_3622|conserved	MSMEG_3622|MSMEG_3622|conserved	1	1	1	MSMEG_3622|MSMEG_3622|conserved hypothetical protein|212 AA	1	1	1	1	0	0	1	0	0	0	0	0	0	0	0	0	1	0	0	0	0	0	0	0	0	0	1	0	0	0	0	0	0	0	8	8	8	22.489	212	212	0.0066637	1.9967
MSMEG_3623|ureG|urease	MSMEG_3623|ureG|urease	5	5	5	MSMEG_3623|ureG|urease accessory protein UreG|228 AA	1	5	5	5	5	4	5	5	5	5	5	5	5	5	5	4	5	5	5	5	5	5	5	5	5	4	5	5	5	5	5	5	5	5	29.4	29.4	29.4	24.307	228	228	0	25.938	By MS/MS	By MS/MS
MSMEG_3625|ureC|urease,	MSMEG_3625|ureC|urease,	10	10	10	MSMEG_3625|ureC|urease, alpha subunit|577 AA	1	10	10	10	6	9	7	10	10	8	9	8	10	9	6	9	7	10	10	8	9	8	10	9	6	9	7	10	10	8	9	8	10	9	30.7	30.7	30.7	60.794	577	577	0	86.468	By MS/MS	By MS/MS
MSMEG_3626|ureB|urease,	MSMEG_3626|ureB|urease,	5	5	5	MSMEG_3626|ureB|urease, beta subunit|109 AA	1	5	5	5	4	4	5	5	4	4	4	5	4	5	4	4	5	5	4	4	4	5	4	5	4	4	5	5	4	4	4	5	4	5	55	55	55	11.555	109	109	0	30.973	By MS/MS	By MS/MS
MSMEG_3627|ureA|urease,	MSMEG_3627|ureA|urease,	5	5	5	MSMEG_3627|ureA|urease, gamma subunit|100 AA	1	5	5	5	4	5	4	4	4	5	5	5	4	5	4	5	4	4	4	5	5	5	4	5	4	5	4	4	4	5	5	5	4	5	74	74	74	11.16	100	100	0	36.173	By MS/MS	By MS/MS
MSMEG_3628|MSMEG_3628|ComA	MSMEG_3628|MSMEG_3628|ComA	3	3	3	MSMEG_3628|MSMEG_3628|ComA operon protein 2|131 AA	1	3	3	3	3	3	2	2	2	2	3	3	2	3	3	3	2	2	2	2	3	3	2	3	3	3	2	2	2	2	3	3	2	3	37.4	37.4	37.4	13.945	131	131	0	205.49	By MS/MS	By MS/MS
MSMEG_3630|MSMEG_3630|transcriptional	MSMEG_3630|MSMEG_3630|transcriptional	2	2	2	MSMEG_3630|MSMEG_3630|transcriptional repressor, CopY family protein|135 AA	1	2	2	2	0	1	2	1	1	2	1	2	2	2	0	1	2	1	1	2	1	2	2	2	0	1	2	1	1	2	1	2	2	2	25.2	25.2	25.2	15.012	135	135	0	17.667		By matching
MSMEG_3632|gnd|6-phosphogluconate	MSMEG_3632|gnd|6-phosphogluconate	23	23	23	MSMEG_3632|gnd|6-phosphogluconate dehydrogenase, decarboxylating|488 AA	1	23	23	23	17	20	20	21	20	18	19	22	21	21	17	20	20	21	20	18	19	22	21	21	17	20	20	21	20	18	19	22	21	21	70.1	70.1	70.1	51.812	488	488	0	303.3	By MS/MS	By MS/MS
MSMEG_3634|MSMEG_3634|IMP	MSMEG_3634|MSMEG_3634|IMP	24	24	24	MSMEG_3634|MSMEG_3634|IMP dehydrogenase family protein|478 AA	1	24	24	24	14	22	20	20	22	20	18	23	23	22	14	22	20	20	22	20	18	23	23	22	14	22	20	20	22	20	18	23	23	22	75.7	75.7	75.7	49.593	478	478	0	174.82	By MS/MS	By MS/MS
MSMEG_3636|MSMEG_3636|ferric	MSMEG_3636|MSMEG_3636|ferric	9	9	9	MSMEG_3636|MSMEG_3636|ferric iron-binding periplasmic protein of ABC transporter|349 AA	1	9	9	9	8	7	8	8	9	9	9	8	9	9	8	7	8	8	9	9	9	8	9	9	8	7	8	8	9	9	9	8	9	9	43	43	43	36.431	349	349	0	74.419	By MS/MS	By MS/MS
MSMEG_3637|MSMEG_3637|CBS	MSMEG_3637|MSMEG_3637|CBS	2	2	2	MSMEG_3637|MSMEG_3637|CBS domain protein|461 AA	1	2	2	2	2	1	2	2	1	1	2	2	1	2	2	1	2	2	1	1	2	2	1	2	2	1	2	2	1	1	2	2	1	2	5.4	5.4	5.4	49.373	461	461	0.00046838	2.891	By MS/MS	By matching
MSMEG_3640|glcB|malate	MSMEG_3640|glcB|malate	30	30	30	MSMEG_3640|glcB|malate synthase G|721 AA	1	30	30	30	24	27	27	28	28	27	26	28	28	29	24	27	27	28	28	27	26	28	28	29	24	27	27	28	28	27	26	28	28	29	53.4	53.4	53.4	78.276	721	721	0	323.31	By MS/MS	By MS/MS
MSMEG_3641|MSMEG_3641|conserved	MSMEG_3641|MSMEG_3641|conserved	12	12	12	MSMEG_3641|MSMEG_3641|conserved hypothetical protein|762 AA	1	12	12	12	12	12	12	12	12	11	12	12	12	12	12	12	12	12	12	11	12	12	12	12	12	12	12	12	12	11	12	12	12	12	26.9	26.9	26.9	80.66	762	762	0	115.46	By MS/MS	By MS/MS
MSMEG_3642|gcvP|glycine	MSMEG_3642|gcvP|glycine	24	24	24	MSMEG_3642|gcvP|glycine dehydrogenase|946 AA	1	24	24	24	15	21	15	19	17	15	20	18	18	19	15	21	15	19	17	15	20	18	18	19	15	21	15	19	17	15	20	18	18	19	38.5	38.5	38.5	100.84	946	946	0	216.9	By MS/MS	By MS/MS
MSMEG_3645|MSMEG_3645|conserved	MSMEG_3645|MSMEG_3645|conserved	6	6	6	MSMEG_3645|MSMEG_3645|conserved hypothetical protein|164 AA	1	6	6	6	4	4	2	6	4	4	4	4	5	6	4	4	2	6	4	4	4	4	5	6	4	4	2	6	4	4	4	4	5	6	56.7	56.7	56.7	18.177	164	164	0	28.629	By MS/MS	By MS/MS
MSMEG_3646|MSMEG_3646|transcriptional	MSMEG_3646|MSMEG_3646|transcriptional	4	4	4	MSMEG_3646|MSMEG_3646|transcriptional regulator, MerR family protein|254 AA	1	4	4	4	3	2	3	2	2	3	1	2	2	2	3	2	3	2	2	3	1	2	2	2	3	2	3	2	2	3	1	2	2	2	26	26	26	27.039	254	254	0	24.758	By MS/MS	By MS/MS
MSMEG_3647|MSMEG_3647|forkhead-associated	MSMEG_3647|MSMEG_3647|forkhead-associated	11	11	11	MSMEG_3647|MSMEG_3647|forkhead-associated protein|143 AA	1	11	11	11	8	10	9	10	8	9	9	9	11	10	8	10	9	10	8	9	9	9	11	10	8	10	9	10	8	9	9	9	11	10	83.2	83.2	83.2	15.008	143	143	0	212.92	By MS/MS	By MS/MS
MSMEG_3648|gcvH|glycine	MSMEG_3648|gcvH|glycine	3	3	3	MSMEG_3648|gcvH|glycine cleavage system H protein|131 AA	1	3	3	3	3	3	3	3	3	3	3	3	3	3	3	3	3	3	3	3	3	3	3	3	3	3	3	3	3	3	3	3	3	3	51.1	51.1	51.1	13.84	131	131	0	119.04	By MS/MS	By MS/MS
MSMEG_3654|MSMEG_3654|ATPase	MSMEG_3654|MSMEG_3654|ATPase	9	9	9	MSMEG_3654|MSMEG_3654|ATPase SecA2|784 AA	1	9	9	9	8	7	3	5	3	3	7	5	4	4	8	7	3	5	3	3	7	5	4	4	8	7	3	5	3	3	7	5	4	4	15.2	15.2	15.2	85.423	784	784	0	70.072	By MS/MS	By MS/MS
MSMEG_3657|MSMEG_3657|succinate	MSMEG_3657|MSMEG_3657|succinate	6	6	6	MSMEG_3657|MSMEG_3657|succinate dehydrogenase|499 AA	1	6	6	6	4	5	4	5	4	3	4	4	4	4	4	5	4	5	4	3	4	4	4	4	4	5	4	5	4	3	4	4	4	4	20.4	20.4	20.4	52.991	499	499	0	52.118	By MS/MS	By MS/MS
MSMEG_3662|MSMEG_3662|mannose-binding	MSMEG_3662|MSMEG_3662|mannose-binding	6	6	6	MSMEG_3662|MSMEG_3662|mannose-binding lectin|208 AA	1	6	6	6	5	5	5	5	5	5	5	5	5	6	5	5	5	5	5	5	5	5	5	6	5	5	5	5	5	5	5	5	5	6	34.1	34.1	34.1	21.922	208	208	0	71.806	By MS/MS	By MS/MS
MSMEG_3663|MSMEG_3663|oxidoreductase|471	MSMEG_3663|MSMEG_3663|oxidoreductase|471	3	3	3	MSMEG_3663|MSMEG_3663|oxidoreductase|471 AA	1	3	3	3	1	2	2	1	2	3	1	2	2	2	1	2	2	1	2	3	1	2	2	2	1	2	2	1	2	3	1	2	2	2	10.2	10.2	10.2	51.856	471	471	0	18.843	By MS/MS	By MS/MS
MSMEG_3667|MSMEG_3667|para-nitrobenzyl	MSMEG_3667|MSMEG_3667|para-nitrobenzyl	2	2	2	MSMEG_3667|MSMEG_3667|para-nitrobenzyl esterase|520 AA	1	2	2	2	2	1	2	1	1	2	2	1	1	1	2	1	2	1	1	2	2	1	1	1	2	1	2	1	1	2	2	1	1	1	4.8	4.8	4.8	56.504	520	520	0	5.5963	By MS/MS	By MS/MS
MSMEG_3673|malQ|4-alpha-glucanotransferase|734	MSMEG_3673|malQ|4-alpha-glucanotransferase|734	6	6	6	MSMEG_3673|malQ|4-alpha-glucanotransferase|734 AA	1	6	6	6	2	5	3	5	3	3	3	6	5	5	2	5	3	5	3	3	3	6	5	5	2	5	3	5	3	3	3	6	5	5	14	14	14	80.615	734	734	0	45.347	By MS/MS	By MS/MS
MSMEG_3674|MSMEG_3674|hypothetical	MSMEG_3674|MSMEG_3674|hypothetical	2	2	2	MSMEG_3674|MSMEG_3674|hypothetical protein|136 AA	1	2	2	2	2	2	2	2	2	2	2	2	2	2	2	2	2	2	2	2	2	2	2	2	2	2	2	2	2	2	2	2	2	2	29.4	29.4	29.4	13.249	136	136	0	202.37	By MS/MS	By MS/MS
MSMEG_3678|MSMEG_3678|hypothetical	MSMEG_3678|MSMEG_3678|hypothetical	4	4	4	MSMEG_3678|MSMEG_3678|hypothetical protein|106 AA	1	4	4	4	3	4	3	4	4	3	3	4	4	3	3	4	3	4	4	3	3	4	4	3	3	4	3	4	4	3	3	4	4	3	42.5	42.5	42.5	11.669	106	106	0	25.971	By MS/MS	By MS/MS
MSMEG_3680|MSMEG_3680|hypothetical;MSMEG_6498|MSMEG_6498|hypothetical	MSMEG_3680|MSMEG_3680|hypothetical;MSMEG_6498|MSMEG_6498|hypothetical	2;1	2;1	2;1	MSMEG_3680|MSMEG_3680|hypothetical protein|101 AA;MSMEG_6498|MSMEG_6498|hypothetical protein|97 AA	2	2	2	2	2	2	2	2	2	2	2	2	2	2	2	2	2	2	2	2	2	2	2	2	2	2	2	2	2	2	2	2	2	2	28.7	28.7	28.7	10.133	101	101;97	0.00093153	2.8122	By MS/MS	By matching
MSMEG_3685|MSMEG_3685|conserved	MSMEG_3685|MSMEG_3685|conserved	5	5	5	MSMEG_3685|MSMEG_3685|conserved hypothetical protein|143 AA	1	5	5	5	5	5	4	5	5	5	5	5	5	5	5	5	4	5	5	5	5	5	5	5	5	5	4	5	5	5	5	5	5	5	46.9	46.9	46.9	15.315	143	143	0	48.852	By MS/MS	By MS/MS
MSMEG_3686|MSMEG_3686|conserved	MSMEG_3686|MSMEG_3686|conserved	3	3	3	MSMEG_3686|MSMEG_3686|conserved hypothetical protein|141 AA	1	3	3	3	2	3	2	3	2	2	3	2	2	2	2	3	2	3	2	2	3	2	2	2	2	3	2	3	2	2	3	2	2	2	32.6	32.6	32.6	14.975	141	141	0	5.022	By MS/MS	By MS/MS
MSMEG_3691|galT|galactose-1-phosphate	MSMEG_3691|galT|galactose-1-phosphate	1	1	1	MSMEG_3691|galT|galactose-1-phosphate uridylyltransferase|360 AA	1	1	1	1	0	1	0	1	0	1	1	1	1	1	0	1	0	1	0	1	1	1	1	1	0	1	0	1	0	1	1	1	1	1	4.7	4.7	4.7	40.75	360	360	0.0058244	2.1004		By matching
MSMEG_3692|galK|galactokinase|362	MSMEG_3692|galK|galactokinase|362	4	4	4	MSMEG_3692|galK|galactokinase|362 AA	1	4	4	4	1	0	1	3	2	1	1	2	2	2	1	0	1	3	2	1	1	2	2	2	1	0	1	3	2	1	1	2	2	2	20.7	20.7	20.7	38.013	362	362	0	4.73	By matching
MSMEG_3706|aceA|isocitrate	MSMEG_3706|aceA|isocitrate	7	7	7	MSMEG_3706|aceA|isocitrate lyase|769 AA	1	7	7	7	0	4	2	4	3	3	2	2	3	3	0	4	2	4	3	3	2	2	3	3	0	4	2	4	3	3	2	2	3	3	13.1	13.1	13.1	85.329	769	769	0	10.439		By MS/MS
MSMEG_3708|MSMEG_3708|catalase|359	MSMEG_3708|MSMEG_3708|catalase|359	1	1	1	MSMEG_3708|MSMEG_3708|catalase|359 AA	1	1	1	1	0	0	1	0	0	0	0	1	1	1	0	0	1	0	0	0	0	1	1	1	0	0	1	0	0	0	0	1	1	1	5.8	5.8	5.8	38.347	359	359	0	26.301
MSMEG_3733|MSMEG_3733|conserved	MSMEG_3733|MSMEG_3733|conserved	5	5	5	MSMEG_3733|MSMEG_3733|conserved hypothetical protein|85 AA	1	5	5	5	4	5	3	3	3	5	5	5	4	3	4	5	3	3	3	5	5	5	4	3	4	5	3	3	3	5	5	5	4	3	70.6	70.6	70.6	9.6615	85	85	0	26.6	By MS/MS	By MS/MS
MSMEG_3738|MSMEG_3738|GTP-binding	MSMEG_3738|MSMEG_3738|GTP-binding	6	6	6	MSMEG_3738|MSMEG_3738|GTP-binding protein EngA|471 AA	1	6	6	6	2	3	6	6	6	5	4	6	5	5	2	3	6	6	6	5	4	6	5	5	2	3	6	6	6	5	4	6	5	5	18.7	18.7	18.7	51.133	471	471	0	19.995	By matching	By MS/MS
MSMEG_3739|cmk|cytidylate	MSMEG_3739|cmk|cytidylate	11	11	11	MSMEG_3739|cmk|cytidylate kinase|228 AA	1	11	11	11	8	11	11	11	11	11	8	10	11	11	8	11	11	11	11	11	8	10	11	11	8	11	11	11	11	11	8	10	11	11	77.6	77.6	77.6	23.536	228	228	0	118.32	By MS/MS	By MS/MS
MSMEG_3740|rluB|ribosomal	MSMEG_3740|rluB|ribosomal	10	10	10	MSMEG_3740|rluB|ribosomal large subunit pseudouridine synthase B|247 AA	1	10	10	10	9	10	10	10	10	9	10	10	9	10	9	10	10	10	10	9	10	10	9	10	9	10	10	10	10	9	10	10	9	10	57.1	57.1	57.1	27.01	247	247	0	36.971	By MS/MS	By MS/MS
MSMEG_3741|MSMEG_3741|transcriptional	MSMEG_3741|MSMEG_3741|transcriptional	10	10	10	MSMEG_3741|MSMEG_3741|transcriptional regulator|276 AA	1	10	10	10	7	9	9	10	9	9	7	10	10	9	7	9	9	10	9	9	7	10	10	9	7	9	9	10	9	9	7	10	10	9	58.3	58.3	58.3	29.132	276	276	0	87.922	By MS/MS	By MS/MS
MSMEG_3745|MSMEG_3745|MutT/nudix	MSMEG_3745|MSMEG_3745|MutT/nudix	4	4	4	MSMEG_3745|MSMEG_3745|MutT/nudix family protein|206 AA	1	4	4	4	3	2	1	3	4	2	3	2	4	3	3	2	1	3	4	2	3	2	4	3	3	2	1	3	4	2	3	2	4	3	30.6	30.6	30.6	22.432	206	206	0	54.033	By matching	By MS/MS
MSMEG_3746|pyrG|CTP	MSMEG_3746|pyrG|CTP	13	13	13	MSMEG_3746|pyrG|CTP synthase|590 AA	1	13	13	13	10	9	9	12	9	8	10	10	11	9	10	9	9	12	9	8	10	10	11	9	10	9	9	12	9	8	10	10	11	9	37.6	37.6	37.6	64.258	590	590	0	83.485	By MS/MS	By MS/MS
MSMEG_3750|MSMEG_3750|inorganic	MSMEG_3750|MSMEG_3750|inorganic	4	4	4	MSMEG_3750|MSMEG_3750|inorganic polyphosphate/ATP-NAD kinase (Poly(P)/ATP NADkinase)|307 AA	1	4	4	4	3	1	3	4	3	3	4	4	4	3	3	1	3	4	3	3	4	4	4	3	3	1	3	4	3	3	4	4	4	3	13.4	13.4	13.4	32.819	307	307	0	5.6806	By matching	By matching
MSMEG_3751|MSMEG_3751|hemolysin	MSMEG_3751|MSMEG_3751|hemolysin	4	4	4	MSMEG_3751|MSMEG_3751|hemolysin A|269 AA	1	4	4	4	3	2	3	3	4	2	4	2	3	4	3	2	3	3	4	2	4	2	3	4	3	2	3	3	4	2	4	2	3	4	15.2	15.2	15.2	28.359	269	269	0	9.9504	By MS/MS	By matching
MSMEG_3752|MSMEG_3752|conserved	MSMEG_3752|MSMEG_3752|conserved	4	4	4	MSMEG_3752|MSMEG_3752|conserved hypothetical protein|68 AA	1	4	4	4	2	3	3	3	2	3	3	3	3	3	2	3	3	3	2	3	3	3	3	3	2	3	3	3	2	3	3	3	3	3	95.6	95.6	95.6	7.1068	68	68	0	34.546	By MS/MS	By MS/MS
MSMEG_3753|MSMEG_3753|hydrolase|342	MSMEG_3753|MSMEG_3753|hydrolase|342	12	12	12	MSMEG_3753|MSMEG_3753|hydrolase|342 AA	1	12	12	12	9	10	9	9	8	9	10	9	9	9	9	10	9	9	8	9	10	9	9	9	9	10	9	9	8	9	10	9	9	9	50	50	50	36.007	342	342	0	106.19	By MS/MS	By MS/MS
MSMEG_3754|MSMEG_3754|TPR-repeat-containing	MSMEG_3754|MSMEG_3754|TPR-repeat-containing	6	6	6	MSMEG_3754|MSMEG_3754|TPR-repeat-containing protein|329 AA	1	6	6	6	3	5	4	5	3	4	5	5	5	5	3	5	4	5	3	4	5	5	5	5	3	5	4	5	3	4	5	5	5	5	31.9	31.9	31.9	35.572	329	329	0	98.261	By MS/MS	By MS/MS
MSMEG_3758|tyrS|tyrosyl-tRNA	MSMEG_3758|tyrS|tyrosyl-tRNA	9	9	9	MSMEG_3758|tyrS|tyrosyl-tRNA synthetase|440 AA	1	9	9	9	4	8	5	7	6	4	7	8	7	8	4	8	5	7	6	4	7	8	7	8	4	8	5	7	6	4	7	8	7	8	33.9	33.9	33.9	48.074	440	440	0	101.6	By MS/MS	By MS/MS
MSMEG_3761|MSMEG_3761|putative	MSMEG_3761|MSMEG_3761|putative	1	1	1	MSMEG_3761|MSMEG_3761|putative Clp protease subunit|188 AA	1	1	1	1	1	0	1	1	1	1	1	1	1	0	1	0	1	1	1	1	1	1	1	0	1	0	1	1	1	1	1	1	1	0	9	9	9	20.508	188	188	0.0013736	2.557	By MS/MS
MSMEG_3764|MSMEG_3764|conserved	MSMEG_3764|MSMEG_3764|conserved	3	3	3	MSMEG_3764|MSMEG_3764|conserved hypothetical protein|69 AA	1	3	3	3	1	3	3	3	2	2	3	3	3	3	1	3	3	3	2	2	3	3	3	3	1	3	3	3	2	2	3	3	3	3	72.5	72.5	72.5	7.9971	69	69	0	35.183	By matching	By MS/MS
MSMEG_3766|MSMEG_3766|hypothetical	MSMEG_3766|MSMEG_3766|hypothetical	3	3	3	MSMEG_3766|MSMEG_3766|hypothetical protein|178 AA	1	3	3	3	2	3	1	1	2	1	2	2	2	2	2	3	1	1	2	1	2	2	2	2	2	3	1	1	2	1	2	2	2	2	24.7	24.7	24.7	18.151	178	178	0	77.669	By MS/MS	By MS/MS
MSMEG_3767|MSMEG_3767|acyl-CoA	MSMEG_3767|MSMEG_3767|acyl-CoA	2	2	2	MSMEG_3767|MSMEG_3767|acyl-CoA synthase|997 AA	1	2	2	2	2	2	2	2	2	2	2	2	2	2	2	2	2	2	2	2	2	2	2	2	2	2	2	2	2	2	2	2	2	2	2.7	2.7	2.7	107.34	997	997	0	10.091	By matching	By MS/MS
MSMEG_3768|MSMEG_3768|macrolide-transport	MSMEG_3768|MSMEG_3768|macrolide-transport	1	1	1	MSMEG_3768|MSMEG_3768|macrolide-transport ATP-binding protein abc transporter|590 AA	1	1	1	1	0	1	1	1	1	1	0	1	1	1	0	1	1	1	1	1	0	1	1	1	0	1	1	1	1	1	0	1	1	1	2	2	2	64.903	590	590	0	3.3618		By matching
MSMEG_3769|argH|argininosuccinate	MSMEG_3769|argH|argininosuccinate	13	13	13	MSMEG_3769|argH|argininosuccinate lyase|469 AA	1	13	13	13	9	12	10	11	10	11	10	11	11	10	9	12	10	11	10	11	10	11	11	10	9	12	10	11	10	11	10	11	11	10	46.7	46.7	46.7	49.743	469	469	0	164.84	By MS/MS	By MS/MS
MSMEG_3770|argG|argininosuccinate	MSMEG_3770|argG|argininosuccinate	8	8	8	MSMEG_3770|argG|argininosuccinate synthase|399 AA	1	8	8	8	6	8	6	7	7	6	7	6	7	6	6	8	6	7	7	6	7	6	7	6	6	8	6	7	7	6	7	6	7	6	33.8	33.8	33.8	43.968	399	399	0	53.593	By MS/MS	By MS/MS
MSMEG_3771|argR|arginine	MSMEG_3771|argR|arginine	7	7	7	MSMEG_3771|argR|arginine repressor|158 AA	1	7	7	7	5	7	6	6	6	6	7	6	6	6	5	7	6	6	6	6	7	6	6	6	5	7	6	6	6	6	7	6	6	6	72.2	72.2	72.2	16.062	158	158	0	62.545	By MS/MS	By MS/MS
MSMEG_3772|argF|ornithine	MSMEG_3772|argF|ornithine	10	10	10	MSMEG_3772|argF|ornithine carbamoyltransferase|307 AA	1	10	10	10	7	8	7	10	10	8	9	8	10	10	7	8	7	10	10	8	9	8	10	10	7	8	7	10	10	8	9	8	10	10	52.1	52.1	52.1	33.387	307	307	0	101.01	By MS/MS	By MS/MS
MSMEG_3773|argD|acetylornithine	MSMEG_3773|argD|acetylornithine	7	7	7	MSMEG_3773|argD|acetylornithine aminotransferase|390 AA	1	7	7	7	6	6	6	7	6	6	6	7	7	7	6	6	6	7	6	6	6	7	7	7	6	6	6	7	6	6	6	7	7	7	24.4	24.4	24.4	39.795	390	390	0	91.765	By MS/MS	By MS/MS
MSMEG_3774|argB|acetylglutamate	MSMEG_3774|argB|acetylglutamate	3	3	3	MSMEG_3774|argB|acetylglutamate kinase|293 AA	1	3	3	3	2	0	2	2	2	1	1	2	2	2	2	0	2	2	2	1	1	2	2	2	2	0	2	2	2	1	1	2	2	2	16	16	16	30.658	293	293	0	7.733	By MS/MS
MSMEG_3775|argJ|arginine	MSMEG_3775|argJ|arginine	11	11	11	MSMEG_3775|argJ|arginine biosynthesis bifunctional protein ArgJ|398 AA	1	11	11	11	8	11	11	10	9	9	9	11	10	10	8	11	11	10	9	9	9	11	10	10	8	11	11	10	9	9	9	11	10	10	47	47	47	40.354	398	398	0	184.1	By MS/MS	By MS/MS
MSMEG_3776|argC|N-acetyl-gamma-glutamyl-phosphate	MSMEG_3776|argC|N-acetyl-gamma-glutamyl-phosphate	9	9	9	MSMEG_3776|argC|N-acetyl-gamma-glutamyl-phosphate reductase|343 AA	1	9	9	9	6	8	9	9	9	8	8	9	9	9	6	8	9	9	9	8	8	9	9	9	6	8	9	9	9	8	8	9	9	9	44	44	44	34.844	343	343	0	101.17	By MS/MS	By MS/MS
MSMEG_3777|pheT|phenylalanyl-tRNA	MSMEG_3777|pheT|phenylalanyl-tRNA	22	22	22	MSMEG_3777|pheT|phenylalanyl-tRNA synthetase, beta subunit|832 AA	1	22	22	22	15	17	20	21	22	20	17	19	19	22	15	17	20	21	22	20	17	19	19	22	15	17	20	21	22	20	17	19	19	22	42.8	42.8	42.8	88.65	832	832	0	139	By MS/MS	By MS/MS
MSMEG_3778|pheS|phenylalanyl-tRNA	MSMEG_3778|pheS|phenylalanyl-tRNA	12	12	12	MSMEG_3778|pheS|phenylalanyl-tRNA synthetase, alpha subunit|356 AA	1	12	12	12	10	11	10	12	12	12	11	11	12	10	10	11	10	12	12	12	11	11	12	10	10	11	10	12	12	12	11	11	12	10	42.4	42.4	42.4	38.904	356	356	0	297.15	By MS/MS	By MS/MS
MSMEG_3782|MSMEG_3782|endoribonuclease	MSMEG_3782|MSMEG_3782|endoribonuclease	3	3	3	MSMEG_3782|MSMEG_3782|endoribonuclease L-PSP, putative|135 AA	1	3	3	3	1	3	2	2	3	2	3	3	2	2	1	3	2	2	3	2	3	3	2	2	1	3	2	2	3	2	3	3	2	2	44.4	44.4	44.4	14.494	135	135	0	22.786	By matching	By MS/MS
MSMEG_3783|MSMEG_3783|acyl-CoA	MSMEG_3783|MSMEG_3783|acyl-CoA	3	3	3	MSMEG_3783|MSMEG_3783|acyl-CoA dehydrogenase|411 AA	1	3	3	3	1	1	1	3	1	2	2	1	2	1	1	1	1	3	1	2	2	1	2	1	1	1	1	3	1	2	2	1	2	1	5.8	5.8	5.8	45.054	411	411	0.0009298	2.7706	By matching	By matching
MSMEG_3786|MSMEG_3786|D-amino	MSMEG_3786|MSMEG_3786|D-amino	2	2	2	MSMEG_3786|MSMEG_3786|D-amino acid deaminase|424 AA	1	2	2	2	1	2	2	2	2	2	2	2	2	2	1	2	2	2	2	2	2	2	2	2	1	2	2	2	2	2	2	2	2	2	8.5	8.5	8.5	45.332	424	424	0	3.664	By matching	By MS/MS
MSMEG_3791|rplT|ribosomal	MSMEG_3791|rplT|ribosomal	6	6	6	MSMEG_3791|rplT|ribosomal protein L20|129 AA	1	6	6	6	4	6	5	5	6	6	5	6	5	5	4	6	5	5	6	6	5	6	5	5	4	6	5	5	6	6	5	6	5	5	45.7	45.7	45.7	14.464	129	129	0	153.93	By MS/MS	By MS/MS
MSMEG_3793|infC|translation	MSMEG_3793|infC|translation	6	6	6	MSMEG_3793|infC|translation initiation factor IF-3|206 AA	1	6	6	6	6	6	6	6	6	6	6	6	6	6	6	6	6	6	6	6	6	6	6	6	6	6	6	6	6	6	6	6	6	6	38.3	38.3	38.3	22.899	206	206	0	76.715	By MS/MS	By MS/MS
MSMEG_3795|MSMEG_3795|conserved	MSMEG_3795|MSMEG_3795|conserved	6	6	6	MSMEG_3795|MSMEG_3795|conserved hypothetical protein|119 AA	1	6	6	6	5	6	6	5	5	5	5	6	6	6	5	6	6	5	5	5	5	6	6	6	5	6	6	5	5	5	5	6	6	6	73.1	73.1	73.1	12.537	119	119	0	56.969	By MS/MS	By MS/MS
MSMEG_3804|MSMEG_3804|conserved	MSMEG_3804|MSMEG_3804|conserved	2	2	2	MSMEG_3804|MSMEG_3804|conserved hypothetical protein|84 AA	1	2	2	2	2	2	2	2	2	2	2	2	2	2	2	2	2	2	2	2	2	2	2	2	2	2	2	2	2	2	2	2	2	2	56	56	56	9.4271	84	84	0	22.193	By MS/MS	By MS/MS
MSMEG_3807|MSMEG_3807|TetR-type	MSMEG_3807|MSMEG_3807|TetR-type	4	4	4	MSMEG_3807|MSMEG_3807|TetR-type regulator|200 AA	1	4	4	4	1	2	2	2	2	4	2	3	2	3	1	2	2	2	2	4	2	3	2	3	1	2	2	2	2	4	2	3	2	3	31.5	31.5	31.5	21.41	200	200	0	32.25	By MS/MS	By MS/MS
MSMEG_3808|uvrA|excinuclease	MSMEG_3808|uvrA|excinuclease	9	9	9	MSMEG_3808|uvrA|excinuclease ABC, A subunit|964 AA	1	9	9	9	5	6	6	8	7	7	7	7	7	9	5	6	6	8	7	7	7	7	7	9	5	6	6	8	7	7	7	7	7	9	13.2	13.2	13.2	105.95	964	964	0	29.156	By MS/MS	By MS/MS
MSMEG_3810|MSMEG_3810|hydrolase|234	MSMEG_3810|MSMEG_3810|hydrolase|234	8	8	8	MSMEG_3810|MSMEG_3810|hydrolase|234 AA	1	8	8	8	6	8	7	7	7	7	7	7	8	8	6	8	7	7	7	7	7	7	8	8	6	8	7	7	7	7	7	7	8	8	54.7	54.7	54.7	24.631	234	234	0	49.543	By MS/MS	By MS/MS
MSMEG_3811|MSMEG_3811|universal	MSMEG_3811|MSMEG_3811|universal	11	11	11	MSMEG_3811|MSMEG_3811|universal stress protein family protein, putative|147 AA	1	11	11	11	10	10	11	11	11	10	10	10	11	10	10	10	11	11	11	10	10	10	11	10	10	10	11	11	11	10	10	10	11	10	83.7	83.7	83.7	15.207	147	147	0	323.31	By MS/MS	By MS/MS
MSMEG_3816|uvrB|excinuclease	MSMEG_3816|uvrB|excinuclease	3	3	3	MSMEG_3816|uvrB|excinuclease ABC, B subunit|736 AA	1	3	3	3	1	1	1	2	2	1	2	2	2	2	1	1	1	2	2	1	2	2	2	2	1	1	1	2	2	1	2	2	2	2	5.4	5.4	5.4	82.68	736	736	0	12.392	By MS/MS	By matching
MSMEG_3817|MSMEG_3817|conserved	MSMEG_3817|MSMEG_3817|conserved	1	1	1	MSMEG_3817|MSMEG_3817|conserved hypothetical protein|146 AA	1	1	1	1	0	0	0	1	1	0	0	1	1	1	0	0	0	1	1	0	0	1	1	1	0	0	0	1	1	0	0	1	1	1	17.1	17.1	17.1	16.583	146	146	0	3.7646
MSMEG_3819|MSMEG_3819|conserved	MSMEG_3819|MSMEG_3819|conserved	2	2	2	MSMEG_3819|MSMEG_3819|conserved hypothetical protein|181 AA	1	2	2	2	2	2	2	1	2	2	2	2	1	1	2	2	2	1	2	2	2	2	1	1	2	2	2	1	2	2	2	2	1	1	19.9	19.9	19.9	18.727	181	181	0	75.953	By MS/MS	By MS/MS
MSMEG_3822|MSMEG_3822|regulatory	MSMEG_3822|MSMEG_3822|regulatory	2	2	2	MSMEG_3822|MSMEG_3822|regulatory protein GntR, HTH|244 AA	1	2	2	2	2	2	2	2	2	2	2	2	2	2	2	2	2	2	2	2	2	2	2	2	2	2	2	2	2	2	2	2	2	2	8.2	8.2	8.2	27.645	244	244	0	3.3971	By matching	By matching
MSMEG_3828|MSMEG_3828|glutamine	MSMEG_3828|MSMEG_3828|glutamine	3	3	3	MSMEG_3828|MSMEG_3828|glutamine synthetase|459 AA	1	3	3	3	2	1	2	2	3	2	1	2	3	2	2	1	2	2	3	2	1	2	3	2	2	1	2	2	3	2	1	2	3	2	6.8	6.8	6.8	51.162	459	459	0.0013825	2.6659	By matching	By matching
MSMEG_3829|MSMEG_3829|esterase|314	MSMEG_3829|MSMEG_3829|esterase|314	8	8	8	MSMEG_3829|MSMEG_3829|esterase|314 AA	1	8	8	8	6	8	6	6	7	7	7	6	6	6	6	8	6	6	7	7	7	6	6	6	6	8	6	6	7	7	7	6	6	6	31.2	31.2	31.2	33.282	314	314	0	45.641	By MS/MS	By MS/MS
MSMEG_3833|MSMEG_3833|30S	MSMEG_3833|MSMEG_3833|30S	32	32	32	MSMEG_3833|MSMEG_3833|30S ribosomal protein S1|479 AA	1	32	32	32	25	28	28	27	29	28	29	31	28	28	25	28	28	27	29	28	29	31	28	28	25	28	28	27	29	28	29	31	28	28	70.1	70.1	70.1	53.315	479	479	0	323.31	By MS/MS	By MS/MS
MSMEG_3839|MSMEG_3839|DNA	MSMEG_3839|MSMEG_3839|DNA	10	10	10	MSMEG_3839|MSMEG_3839|DNA polymerase I|908 AA	1	10	10	10	6	4	3	6	4	4	4	5	4	10	6	4	3	6	4	4	4	5	4	10	6	4	3	6	4	4	4	5	4	10	17.2	17.2	17.2	99.896	908	908	0	66.031	By MS/MS	By MS/MS
MSMEG_3843|MSMEG_3843|conserved	MSMEG_3843|MSMEG_3843|conserved	2	2	2	MSMEG_3843|MSMEG_3843|conserved hypothetical protein|149 AA	1	2	2	2	1	1	1	2	1	1	2	1	0	1	1	1	1	2	1	1	2	1	0	1	1	1	1	2	1	1	2	1	0	1	34.9	34.9	34.9	16.098	149	149	0	21.104	By MS/MS	By matching
MSMEG_3844|MSMEG_3844|lipid-transfer	MSMEG_3844|MSMEG_3844|lipid-transfer	2	2	2	MSMEG_3844|MSMEG_3844|lipid-transfer protein|400 AA	1	2	2	2	0	0	0	1	0	0	0	1	1	1	0	0	0	1	0	0	0	1	1	1	0	0	0	1	0	0	0	1	1	1	10.8	10.8	10.8	42.303	400	400	0	10.3
MSMEG_3846|MSMEG_3846|phosphotransferase	MSMEG_3846|MSMEG_3846|phosphotransferase	3	3	3	MSMEG_3846|MSMEG_3846|phosphotransferase enzyme family protein|663 AA	1	3	3	3	2	3	1	3	2	3	3	3	2	2	2	3	1	3	2	3	3	3	2	2	2	3	1	3	2	3	3	3	2	2	6.8	6.8	6.8	72.197	663	663	0	19.026	By MS/MS	By matching
MSMEG_3851|MSMEG_3851|LppI	MSMEG_3851|MSMEG_3851|LppI	2	2	2	MSMEG_3851|MSMEG_3851|LppI protein|229 AA	1	2	2	2	1	1	1	2	1	2	2	2	1	1	1	1	1	2	1	2	2	2	1	1	1	1	1	2	1	2	2	2	1	1	16.2	16.2	16.2	23.169	229	229	0	9.009	By MS/MS	By matching
MSMEG_3858|MSMEG_3858|conserved	MSMEG_3858|MSMEG_3858|conserved	6	6	6	MSMEG_3858|MSMEG_3858|conserved hypothetical protein|117 AA	1	6	6	6	5	6	6	5	6	6	5	6	6	5	5	6	6	5	6	6	5	6	6	5	5	6	6	5	6	6	5	6	6	5	63.2	63.2	63.2	13.42	117	117	0	156.79	By MS/MS	By MS/MS
MSMEG_3859|MSMEG_3859|glycosyl	MSMEG_3859|MSMEG_3859|glycosyl	3	3	3	MSMEG_3859|MSMEG_3859|glycosyl transferase, group 2 family protein|265 AA	1	3	3	3	2	2	2	3	2	3	2	3	2	3	2	2	2	3	2	3	2	3	2	3	2	2	2	3	2	3	2	3	2	3	13.6	13.6	13.6	29.106	265	265	0	12.415	By MS/MS	By MS/MS
MSMEG_3861|MSMEG_3861|amidohydrolase	MSMEG_3861|MSMEG_3861|amidohydrolase	3	3	3	MSMEG_3861|MSMEG_3861|amidohydrolase 3|530 AA	1	3	3	3	3	2	2	3	3	2	3	3	3	3	3	2	2	3	3	2	3	3	3	3	3	2	2	3	3	2	3	3	3	3	6.6	6.6	6.6	55.526	530	530	0	8.3031	By MS/MS	By matching
MSMEG_3862|MSMEG_3862|FxsA	MSMEG_3862|MSMEG_3862|FxsA	1	1	1	MSMEG_3862|MSMEG_3862|FxsA cytoplasmic membrane protein|168 AA	1	1	1	1	1	1	1	1	1	1	1	1	0	1	1	1	1	1	1	1	1	1	0	1	1	1	1	1	1	1	1	1	0	1	14.9	14.9	14.9	17.217	168	168	0.0013857	2.7053	By matching	By MS/MS
MSMEG_3863|MSMEG_3863|pyridoxamine	MSMEG_3863|MSMEG_3863|pyridoxamine	2	2	2	MSMEG_3863|MSMEG_3863|pyridoxamine 5-phosphate oxidase family protein|130 AA	1	2	2	2	2	0	2	2	1	1	1	2	2	1	2	0	2	2	1	1	1	2	2	1	2	0	2	2	1	1	1	2	2	1	10.8	10.8	10.8	14.338	130	130	0.0013806	2.6579	By matching
MSMEG_3864|cobN|cobaltochelatase,	MSMEG_3864|cobN|cobaltochelatase,	22	22	22	MSMEG_3864|cobN|cobaltochelatase, CobN subunit|1211 AA	1	22	22	22	15	17	14	18	17	16	18	16	18	19	15	17	14	18	17	16	18	16	18	19	15	17	14	18	17	16	18	16	18	19	30.4	30.4	30.4	130.64	1211	1211	0	308.39	By MS/MS	By MS/MS
MSMEG_3872|MSMEG_3872|precorrin-8X	MSMEG_3872|MSMEG_3872|precorrin-8X	3	3	3	MSMEG_3872|MSMEG_3872|precorrin-8X methylmutase|208 AA	1	3	3	3	3	2	3	3	3	3	3	3	3	2	3	2	3	3	3	3	3	3	3	2	3	2	3	3	3	3	3	3	3	2	27.4	27.4	27.4	21.787	208	208	0	18.305	By MS/MS	By MS/MS
MSMEG_3873|MSMEG_3873|cobalamin	MSMEG_3873|MSMEG_3873|cobalamin	2	2	2	MSMEG_3873|MSMEG_3873|cobalamin biosynthesis protein cobIJ|503 AA	1	2	2	2	0	2	1	1	2	1	0	2	2	2	0	2	1	1	2	1	0	2	2	2	0	2	1	1	2	1	0	2	2	2	6.2	6.2	6.2	54.004	503	503	0	3.9279		By matching
MSMEG_3875|cobK|precorrin-6x	MSMEG_3875|cobK|precorrin-6x	1	1	1	MSMEG_3875|cobK|precorrin-6x reductase|251 AA	1	1	1	1	0	0	1	1	1	1	0	0	1	1	0	0	1	1	1	1	0	0	1	1	0	0	1	1	1	1	0	0	1	1	5.2	5.2	5.2	26.589	251	251	0	2.9811
MSMEG_3877|cobM|precorrin-4	MSMEG_3877|cobM|precorrin-4	4	4	4	MSMEG_3877|cobM|precorrin-4 C11-methyltransferase|251 AA	1	4	4	4	2	3	2	3	3	2	3	3	4	3	2	3	2	3	3	2	3	3	4	3	2	3	2	3	3	2	3	3	4	3	29.5	29.5	29.5	26.217	251	251	0	6.5957	By matching	By MS/MS
MSMEG_3878|cobL|precorrin-6Y	MSMEG_3878|cobL|precorrin-6Y	2	2	2	MSMEG_3878|cobL|precorrin-6Y C5,15-methyltransferase (decarboxylating)|394 AA	1	2	2	2	1	0	1	2	1	0	1	1	1	1	1	0	1	2	1	0	1	1	1	1	1	0	1	2	1	0	1	1	1	1	4.6	4.6	4.6	41.664	394	394	0	4.8055	By matching
MSMEG_3880|MSMEG_3880|nitrilase/cyanide	MSMEG_3880|MSMEG_3880|nitrilase/cyanide	2	2	2	MSMEG_3880|MSMEG_3880|nitrilase/cyanide hydratase and apolipoprotein N-acyltransferase|139 AA	1	2	2	2	1	2	2	2	2	1	2	2	2	1	1	2	2	2	2	1	2	2	2	1	1	2	2	2	2	1	2	2	2	1	17.3	17.3	17.3	15.214	139	139	0	10.921	By matching	By matching
MSMEG_3881|MSMEG_3881|proline	MSMEG_3881|MSMEG_3881|proline	14	14	14	MSMEG_3881|MSMEG_3881|proline dipeptidase|375 AA	1	14	14	14	12	14	13	13	13	12	14	14	13	14	12	14	13	13	13	12	14	14	13	14	12	14	13	13	13	12	14	14	13	14	61.9	61.9	61.9	39.656	375	375	0	155.2	By MS/MS	By MS/MS
MSMEG_3883|MSMEG_3883|5'-3'	MSMEG_3883|MSMEG_3883|5'-3'	5	5	5	MSMEG_3883|MSMEG_3883|5-3 exonuclease|338 AA	1	5	5	5	3	5	5	5	5	5	4	5	5	5	3	5	5	5	5	5	4	5	5	5	3	5	5	5	5	5	4	5	5	5	25.1	25.1	25.1	35.944	338	338	0	30.556	By MS/MS	By MS/MS
MSMEG_3884|MSMEG_3884|conserved	MSMEG_3884|MSMEG_3884|conserved	2	2	2	MSMEG_3884|MSMEG_3884|conserved hypothetical protein|287 AA	1	2	2	2	0	1	0	1	1	0	1	1	0	1	0	1	0	1	1	0	1	1	0	1	0	1	0	1	1	0	1	1	0	1	12.2	12.2	12.2	30.66	287	287	0	11.329		By MS/MS
MSMEG_3885|MSMEG_3885|DEAD/DEAH	MSMEG_3885|MSMEG_3885|DEAD/DEAH	3	3	3	MSMEG_3885|MSMEG_3885|DEAD/DEAH box helicase|912 AA	1	3	3	3	1	1	1	3	1	1	3	1	1	3	1	1	1	3	1	1	3	1	1	3	1	1	1	3	1	1	3	1	1	3	4.4	4.4	4.4	99.95	912	912	0	15.589	By MS/MS	By matching
MSMEG_3887|tatA|twin	MSMEG_3887|tatA|twin	3	3	3	MSMEG_3887|tatA|twin arginine-targeting protein translocase, TatA/E family protein|81 AA	1	3	3	3	3	3	1	1	1	1	3	3	1	2	3	3	1	1	1	1	3	3	1	2	3	3	1	1	1	1	3	3	1	2	42	42	42	8.9322	81	81	0	8.8042	By MS/MS	By MS/MS
MSMEG_3888|MSMEG_3888|conserved	MSMEG_3888|MSMEG_3888|conserved	7	7	7	MSMEG_3888|MSMEG_3888|conserved hypothetical protein|318 AA	1	7	7	7	4	5	4	6	5	6	5	6	7	6	4	5	4	6	5	6	5	6	7	6	4	5	4	6	5	6	5	6	7	6	31.4	31.4	31.4	34.017	318	318	0	124.98	By MS/MS	By MS/MS
MSMEG_3890|MSMEG_3890|proteasome	MSMEG_3890|MSMEG_3890|proteasome	3	3	3	MSMEG_3890|MSMEG_3890|proteasome component|452 AA	1	3	3	3	1	2	2	2	2	2	2	3	3	2	1	2	2	2	2	2	2	3	3	2	1	2	2	2	2	2	2	3	3	2	7.7	7.7	7.7	51.373	452	452	0	6.1017	By matching	By matching
MSMEG_3894|MSMEG_3894|proteasome	MSMEG_3894|MSMEG_3894|proteasome	10	10	10	MSMEG_3894|MSMEG_3894|proteasome alpha subunit|246 AA	1	10	10	10	8	8	8	8	10	9	9	9	9	9	8	8	8	8	10	9	9	9	9	9	8	8	8	8	10	9	9	9	9	9	49.2	49.2	49.2	26.915	246	246	0	67.569	By MS/MS	By MS/MS
MSMEG_3895|MSMEG_3895|proteasome	MSMEG_3895|MSMEG_3895|proteasome	12	12	12	MSMEG_3895|MSMEG_3895|proteasome beta subunit|280 AA	1	12	12	12	7	10	11	12	11	9	9	12	10	12	7	10	11	12	11	9	9	12	10	12	7	10	11	12	11	9	9	12	10	12	65	65	65	29.593	280	280	0	163.38	By MS/MS	By MS/MS
MSMEG_3896|pup|conserved	MSMEG_3896|pup|conserved	5	5	5	MSMEG_3896|pup|conserved hypothetical protein|64 AA	1	5	5	5	2	5	5	5	5	5	3	5	5	5	2	5	5	5	5	5	3	5	5	5	2	5	5	5	5	5	3	5	5	5	76.6	76.6	76.6	6.9543	64	64	0	114.21	By MS/MS	By MS/MS
MSMEG_3897|MSMEG_3897|proteasome	MSMEG_3897|MSMEG_3897|proteasome	4	4	4	MSMEG_3897|MSMEG_3897|proteasome component|498 AA	1	4	4	4	2	2	3	3	3	2	2	3	3	2	2	2	3	3	3	2	2	3	3	2	2	2	3	3	3	2	2	3	3	2	16.7	16.7	16.7	54.573	498	498	0	13.322	By matching	By MS/MS
MSMEG_3898|thpD|ectoine	MSMEG_3898|thpD|ectoine	6	6	6	MSMEG_3898|thpD|ectoine hydroxylase|305 AA	1	6	6	6	4	6	5	5	6	6	6	6	6	6	4	6	5	5	6	6	6	6	6	6	4	6	5	5	6	6	6	6	6	6	26.9	26.9	26.9	33.667	305	305	0	82.065	By MS/MS	By MS/MS
MSMEG_3899|ectC|ectoine	MSMEG_3899|ectC|ectoine	3	3	3	MSMEG_3899|ectC|ectoine synthase|130 AA	1	3	3	3	2	3	1	2	1	2	1	2	3	1	2	3	1	2	1	2	1	2	3	1	2	3	1	2	1	2	1	2	3	1	28.5	28.5	28.5	14.606	130	130	0	8.7368	By MS/MS	By MS/MS
MSMEG_3900|ectB|diaminobutyrate--2-oxoglutarate	MSMEG_3900|ectB|diaminobutyrate--2-oxoglutarate	4	4	4	MSMEG_3900|ectB|diaminobutyrate--2-oxoglutarate aminotransferase|428 AA	1	4	4	4	2	3	3	3	2	3	3	2	1	2	2	3	3	3	2	3	3	2	1	2	2	3	3	3	2	3	3	2	1	2	11.9	11.9	11.9	46.474	428	428	0	12.671	By MS/MS	By MS/MS
MSMEG_3902|MSMEG_3902|ATPase,	MSMEG_3902|MSMEG_3902|ATPase,	13	13	12	MSMEG_3902|MSMEG_3902|ATPase, AAA family protein|613 AA	1	13	13	12	10	10	9	11	11	10	11	11	10	13	10	10	9	11	11	10	11	11	10	13	10	10	9	10	10	10	10	10	10	12	38.5	38.5	36.5	67.963	613	613	0	72.516	By MS/MS	By MS/MS
MSMEG_3903|MSMEG_3903|Low	MSMEG_3903|MSMEG_3903|Low	2	2	2	MSMEG_3903|MSMEG_3903|Low molecular weight antigen MTB12|167 AA	1	2	2	2	2	1	2	2	1	2	1	1	2	1	2	1	2	2	1	2	1	1	2	1	2	1	2	2	1	2	1	1	2	1	12.6	12.6	12.6	16.418	167	167	0	15.903	By MS/MS	By MS/MS
MSMEG_3904|MSMEG_3904|LppK	MSMEG_3904|MSMEG_3904|LppK	2	2	2	MSMEG_3904|MSMEG_3904|LppK protein|187 AA	1	2	2	2	2	1	2	1	2	2	2	2	2	2	2	1	2	1	2	2	2	2	2	2	2	1	2	1	2	2	2	2	2	2	15	15	15	19.244	187	187	0	73.935	By matching	By MS/MS
MSMEG_3906|MSMEG_3906|tRNA	MSMEG_3906|MSMEG_3906|tRNA	5	5	5	MSMEG_3906|MSMEG_3906|tRNA (adenine-N(1)-)-methyltransferase|282 AA	1	5	5	5	3	4	4	5	4	4	3	4	4	5	3	4	4	5	4	4	3	4	4	5	3	4	4	5	4	4	3	4	4	5	29.1	29.1	29.1	30.66	282	282	0	32.678	By MS/MS	By MS/MS
MSMEG_3908|MSMEG_3908|conserved	MSMEG_3908|MSMEG_3908|conserved	4	4	4	MSMEG_3908|MSMEG_3908|conserved hypothetical protein|265 AA	1	4	4	4	2	3	2	3	4	1	4	4	3	4	2	3	2	3	4	1	4	4	3	4	2	3	2	3	4	1	4	4	3	4	25.7	25.7	25.7	28.554	265	265	0	57.727	By MS/MS	By MS/MS
MSMEG_3918|MSMEG_3918|hypothetical	MSMEG_3918|MSMEG_3918|hypothetical	3	3	3	MSMEG_3918|MSMEG_3918|hypothetical protein|149 AA	1	3	3	3	1	2	3	3	2	2	2	2	2	2	1	2	3	3	2	2	2	2	2	2	1	2	3	3	2	2	2	2	2	2	30.2	30.2	30.2	16.358	149	149	0	4.5115	By MS/MS	By MS/MS
MSMEG_3932|MSMEG_3932|14	MSMEG_3932|MSMEG_3932|14	4	4	4	MSMEG_3932|MSMEG_3932|14 kDa antigen|145 AA	1	4	4	4	1	3	2	3	1	4	2	1	2	2	1	3	2	3	1	4	2	1	2	2	1	3	2	3	1	4	2	1	2	2	35.2	35.2	35.2	15.927	145	145	0	8.8299	By matching	By MS/MS
MSMEG_3945|MSMEG_3945|universal	MSMEG_3945|MSMEG_3945|universal	2	2	2	MSMEG_3945|MSMEG_3945|universal stress protein family protein|273 AA	1	2	2	2	1	0	1	1	0	1	0	0	2	1	1	0	1	1	0	1	0	0	2	1	1	0	1	1	0	1	0	0	2	1	7.7	7.7	7.7	29.04	273	273	0	2.9753	By matching
MSMEG_3962|MSMEG_3962|lactate	MSMEG_3962|MSMEG_3962|lactate	13	13	13	MSMEG_3962|MSMEG_3962|lactate 2-monooxygenase|394 AA	1	13	13	13	7	11	6	9	9	13	11	10	9	9	7	11	6	9	9	13	11	10	9	9	7	11	6	9	9	13	11	10	9	9	40.9	40.9	40.9	42.747	394	394	0	85.707	By MS/MS	By MS/MS
MSMEG_3980|MSMEG_3980|transcriptional	MSMEG_3980|MSMEG_3980|transcriptional	1	1	1	MSMEG_3980|MSMEG_3980|transcriptional regulator, GntR family protein|214 AA	1	1	1	1	0	0	1	1	1	0	0	1	0	1	0	0	1	1	1	0	0	1	0	1	0	0	1	1	1	0	0	1	0	1	7	7	7	24.046	214	214	0.0018298	2.526
MSMEG_3981|MSMEG_3981|L-carnitine	MSMEG_3981|MSMEG_3981|L-carnitine	1	1	1	MSMEG_3981|MSMEG_3981|L-carnitine dehydratase/bile acid-inducible protein F|393 AA	1	1	1	1	0	0	0	1	0	1	1	0	1	1	0	0	0	1	0	1	1	0	1	1	0	0	0	1	0	1	1	0	1	1	4.6	4.6	4.6	42.788	393	393	0	18.146
MSMEG_3982|MSMEG_3982|acyl-CoA	MSMEG_3982|MSMEG_3982|acyl-CoA	1	1	1	MSMEG_3982|MSMEG_3982|acyl-CoA dehydrogenase|377 AA	1	1	1	1	1	1	1	1	1	0	1	1	1	0	1	1	1	1	1	0	1	1	1	0	1	1	1	1	1	0	1	1	1	0	2.9	2.9	2.9	40.508	377	377	0	8.715	By matching	By matching
MSMEG_3988|MSMEG_3988|transcriptional	MSMEG_3988|MSMEG_3988|transcriptional	1	1	1	MSMEG_3988|MSMEG_3988|transcriptional regulator, AsnC family protein|333 AA	1	1	1	1	0	0	0	0	1	0	0	1	1	1	0	0	0	0	1	0	0	1	1	1	0	0	0	0	1	0	0	1	1	1	6.9	6.9	6.9	36.127	333	333	0.0066785	2.0233
MSMEG_4005|MSMEG_4005|calcium-binding	MSMEG_4005|MSMEG_4005|calcium-binding	2	2	2	MSMEG_4005|MSMEG_4005|calcium-binding protein|291 AA	1	2	2	2	1	1	2	1	2	1	2	1	0	1	1	1	2	1	2	1	2	1	0	1	1	1	2	1	2	1	2	1	0	1	15.1	15.1	15.1	30.031	291	291	0	3.7255	By matching	By matching
MSMEG_4014|MSMEG_4014|N-carbamoyl-L-amino	MSMEG_4014|MSMEG_4014|N-carbamoyl-L-amino	5	5	5	MSMEG_4014|MSMEG_4014|N-carbamoyl-L-amino acid amidohydrolase|431 AA	1	5	5	5	1	2	2	3	2	1	2	2	2	4	1	2	2	3	2	1	2	2	2	4	1	2	2	3	2	1	2	2	2	4	22.3	22.3	22.3	46.253	431	431	0	13.721	By matching	By MS/MS
MSMEG_4032|MSMEG_4032|zinc-binding	MSMEG_4032|MSMEG_4032|zinc-binding	4	4	2	MSMEG_4032|MSMEG_4032|zinc-binding alcohol dehydrogenase|324 AA	1	4	4	2	2	0	2	2	2	2	3	3	2	2	2	0	2	2	2	2	3	3	2	2	1	0	1	1	1	1	2	2	1	1	19.4	19.4	12.7	33.237	324	324	0	26.749	By MS/MS
MSMEG_4042|MSMEG_4042|transcriptional	MSMEG_4042|MSMEG_4042|transcriptional	4	4	4	MSMEG_4042|MSMEG_4042|transcriptional regulator, GntR family protein|252 AA	1	4	4	4	3	3	4	4	4	3	3	4	4	4	3	3	4	4	4	3	3	4	4	4	3	3	4	4	4	3	3	4	4	4	16.3	16.3	16.3	28.196	252	252	0	13.118	By MS/MS	By matching
MSMEG_4043|MSMEG_4043|amidohydrolase	MSMEG_4043|MSMEG_4043|amidohydrolase	3	3	3	MSMEG_4043|MSMEG_4043|amidohydrolase 2|317 AA	1	3	3	3	2	2	3	3	3	2	2	3	3	3	2	2	3	3	3	2	2	3	3	3	2	2	3	3	3	2	2	3	3	3	14.5	14.5	14.5	34.341	317	317	0	50.26	By MS/MS	By MS/MS
MSMEG_4059|MSMEG_4059|haloacid	MSMEG_4059|MSMEG_4059|haloacid	1	1	1	MSMEG_4059|MSMEG_4059|haloacid dehalogenase, type II|229 AA	1	1	1	1	1	1	0	0	1	1	0	0	1	1	1	1	0	0	1	1	0	0	1	1	1	1	0	0	1	1	0	0	1	1	6.1	6.1	6.1	26.007	229	229	0.0071016	1.9842	By MS/MS	By matching
MSMEG_4064|MSMEG_4064|zinc-binding	MSMEG_4064|MSMEG_4064|zinc-binding	4	2	2	MSMEG_4064|MSMEG_4064|zinc-binding alcohol dehydrogenase|333 AA	1	4	2	2	3	0	2	2	2	2	3	3	3	3	2	0	1	1	1	1	2	2	2	2	2	0	1	1	1	1	2	2	2	2	18.9	12.3	12.3	34.431	333	333	0	11.688	By matching
MSMEG_4083|MSMEG_4083|putative	MSMEG_4083|MSMEG_4083|putative	3	3	3	MSMEG_4083|MSMEG_4083|putative monooxygenase|471 AA	1	3	3	3	2	2	1	2	2	2	2	2	3	2	2	2	1	2	2	2	2	2	3	2	2	2	1	2	2	2	2	2	3	2	8.7	8.7	8.7	52.719	471	471	0	5.4849	By matching	By matching
MSMEG_4084|MSMEG_4084|putative	MSMEG_4084|MSMEG_4084|putative	3	3	3	MSMEG_4084|MSMEG_4084|putative acyl-CoA dehydrogenase|385 AA	1	3	3	3	2	1	1	3	2	2	2	2	3	2	2	1	1	3	2	2	2	2	3	2	2	1	1	3	2	2	2	2	3	2	11.7	11.7	11.7	41.818	385	385	0	27.772	By matching	By MS/MS
MSMEG_4102|MSMEG_4102|conserved	MSMEG_4102|MSMEG_4102|conserved	1	1	1	MSMEG_4102|MSMEG_4102|conserved hypothetical protein|369 AA	1	1	1	1	0	0	0	1	1	0	1	0	1	0	0	0	0	1	1	0	1	0	1	0	0	0	0	1	1	0	1	0	1	0	3.8	3.8	3.8	39.387	369	369	0.0070953	1.9723
MSMEG_4111|MSMEG_4111|alpha-methylacyl-CoA	MSMEG_4111|MSMEG_4111|alpha-methylacyl-CoA	3	3	3	MSMEG_4111|MSMEG_4111|alpha-methylacyl-CoA racemase|376 AA	1	3	3	3	1	2	1	3	2	2	2	1	1	2	1	2	1	3	2	2	2	1	1	2	1	2	1	3	2	2	2	1	1	2	13.8	13.8	13.8	40.467	376	376	0	4.4226	By matching	By MS/MS
MSMEG_4112|MSMEG_4112|cyclohexanecarboxylate-CoA	MSMEG_4112|MSMEG_4112|cyclohexanecarboxylate-CoA	11	11	11	MSMEG_4112|MSMEG_4112|cyclohexanecarboxylate-CoA ligase|555 AA	1	11	11	11	6	6	7	10	11	8	10	10	11	9	6	6	7	10	11	8	10	10	11	9	6	6	7	10	11	8	10	10	11	9	31.4	31.4	31.4	60.459	555	555	0	102.52	By MS/MS	By MS/MS
MSMEG_4114|menB|naphthoate	MSMEG_4114|menB|naphthoate	4	4	4	MSMEG_4114|menB|naphthoate synthase|258 AA	1	4	4	4	2	3	3	4	2	2	2	4	4	2	2	3	3	4	2	2	2	4	4	2	2	3	3	4	2	2	2	4	4	2	23.3	23.3	23.3	28.278	258	258	0	22.939	By MS/MS	By MS/MS
MSMEG_4115|MSMEG_4115|3-hydroxybutyryl-CoA	MSMEG_4115|MSMEG_4115|3-hydroxybutyryl-CoA	2	2	2	MSMEG_4115|MSMEG_4115|3-hydroxybutyryl-CoA dehydrogenase|293 AA	1	2	2	2	0	1	0	1	0	1	0	0	2	0	0	1	0	1	0	1	0	0	2	0	0	1	0	1	0	1	0	0	2	0	9.9	9.9	9.9	30.706	293	293	0	11.056		By matching
MSMEG_4116|MSMEG_4116|3-hydroxybutyryl-CoA	MSMEG_4116|MSMEG_4116|3-hydroxybutyryl-CoA	2	2	2	MSMEG_4116|MSMEG_4116|3-hydroxybutyryl-CoA dehydrogenase|296 AA	1	2	2	2	2	2	1	1	1	2	2	1	1	1	2	2	1	1	1	2	2	1	1	1	2	2	1	1	1	2	2	1	1	1	7.4	7.4	7.4	32.119	296	296	0	6.0343	By MS/MS	By MS/MS
MSMEG_4117|MSMEG_4117|2-deoxy-D-gluconate	MSMEG_4117|MSMEG_4117|2-deoxy-D-gluconate	2	2	2	MSMEG_4117|MSMEG_4117|2-deoxy-D-gluconate 3-dehydrogenase|254 AA	1	2	2	2	2	2	2	2	1	1	1	2	2	2	2	2	2	2	1	1	1	2	2	2	2	2	2	2	1	1	1	2	2	2	12.6	12.6	12.6	26.457	254	254	0	56.232	By MS/MS	By MS/MS
MSMEG_4118|MSMEG_4118|acyl-CoA	MSMEG_4118|MSMEG_4118|acyl-CoA	1	1	1	MSMEG_4118|MSMEG_4118|acyl-CoA dehydrogenase|407 AA	1	1	1	1	0	0	1	1	1	1	0	0	1	0	0	0	1	1	1	1	0	0	1	0	0	0	1	1	1	1	0	0	1	0	3.2	3.2	3.2	43.484	407	407	0	8.1141
MSMEG_4121|MSMEG_4121|GntR-family	MSMEG_4121|MSMEG_4121|GntR-family	4	4	4	MSMEG_4121|MSMEG_4121|GntR-family protein transcriptional regulator|246 AA	1	4	4	4	2	3	3	4	3	3	3	3	3	3	2	3	3	4	3	3	3	3	3	3	2	3	3	4	3	3	3	3	3	3	26.4	26.4	26.4	26.836	246	246	0	9.075	By MS/MS	By MS/MS
MSMEG_4123|MSMEG_4123|3-hydroxyisobutyrate	MSMEG_4123|MSMEG_4123|3-hydroxyisobutyrate	2	2	2	MSMEG_4123|MSMEG_4123|3-hydroxyisobutyrate dehydrogenase|299 AA	1	2	2	2	2	1	2	2	2	2	2	2	2	1	2	1	2	2	2	2	2	2	2	1	2	1	2	2	2	2	2	2	2	1	11	11	11	31.103	299	299	0	5.9654	By matching	By matching
MSMEG_4125|MSMEG_4125|oxidoreductase,	MSMEG_4125|MSMEG_4125|oxidoreductase,	3	3	3	MSMEG_4125|MSMEG_4125|oxidoreductase, short chain dehydrogenase/reductase family protein|260 AA	1	3	3	3	3	3	3	3	3	3	3	3	3	3	3	3	3	3	3	3	3	3	3	3	3	3	3	3	3	3	3	3	3	3	13.5	13.5	13.5	26.922	260	260	0	19.388	By MS/MS	By MS/MS
MSMEG_4126|MSMEG_4126|hydrolase,	MSMEG_4126|MSMEG_4126|hydrolase,	3	3	3	MSMEG_4126|MSMEG_4126|hydrolase, isochorismatase family protein|236 AA	1	3	3	3	3	3	3	3	2	3	3	3	3	3	3	3	3	3	2	3	3	3	3	3	3	3	3	3	2	3	3	3	3	3	25.8	25.8	25.8	25.517	236	236	0	8.1365	By MS/MS	By MS/MS
MSMEG_4128|MSMEG_4128|conserved	MSMEG_4128|MSMEG_4128|conserved	2	2	2	MSMEG_4128|MSMEG_4128|conserved hypothetical protein|278 AA	1	2	2	2	1	1	2	1	2	1	1	1	2	2	1	1	2	1	2	1	1	1	2	2	1	1	2	1	2	1	1	1	2	2	12.2	12.2	12.2	30.989	278	278	0	50.681	By matching	By matching
MSMEG_4143|MSMEG_4143|conserved	MSMEG_4143|MSMEG_4143|conserved	3	3	3	MSMEG_4143|MSMEG_4143|conserved hypothetical protein|97 AA	1	3	3	3	3	1	2	2	2	3	3	1	1	2	3	1	2	2	2	3	3	1	1	2	3	1	2	2	2	3	3	1	1	2	41.2	41.2	41.2	10.464	97	97	0	6.1112	By MS/MS	By matching
MSMEG_4145|MSMEG_4145|cupin	MSMEG_4145|MSMEG_4145|cupin	1	1	1	MSMEG_4145|MSMEG_4145|cupin 2 protein|187 AA	1	1	1	1	0	1	1	1	1	1	1	1	1	1	0	1	1	1	1	1	1	1	1	1	0	1	1	1	1	1	1	1	1	1	7	7	7	20.818	187	187	0	4.0635		By matching
MSMEG_4162|MSMEG_4162|conserved	MSMEG_4162|MSMEG_4162|conserved	2	2	2	MSMEG_4162|MSMEG_4162|conserved hypothetical protein|387 AA	1	2	2	2	1	1	1	2	2	1	1	2	2	2	1	1	1	2	2	1	1	2	2	2	1	1	1	2	2	1	1	2	2	2	7.8	7.8	7.8	41.238	387	387	0	10.15	By MS/MS	By MS/MS
MSMEG_4165|MSMEG_4165|[NAD+]	MSMEG_4165|MSMEG_4165|[NAD+]	4	4	4	MSMEG_4165|MSMEG_4165|[NAD+] benzaldehyde dehydrogenase|480 AA	1	4	4	4	4	1	3	3	3	3	4	3	3	2	4	1	3	3	3	3	4	3	3	2	4	1	3	3	3	3	4	3	3	2	9.4	9.4	9.4	49.952	480	480	0	7.7883	By MS/MS	By matching
MSMEG_4167|MSMEG_4167|alcohol	MSMEG_4167|MSMEG_4167|alcohol	9	9	9	MSMEG_4167|MSMEG_4167|alcohol dehydrogenase B|377 AA	1	9	9	9	3	5	5	5	6	5	6	4	7	7	3	5	5	5	6	5	6	4	7	7	3	5	5	5	6	5	6	4	7	7	35	35	35	40.683	377	377	0	56.768	By matching	By MS/MS
MSMEG_4172|MSMEG_4172|D-ribose-binding	MSMEG_4172|MSMEG_4172|D-ribose-binding	2	2	2	MSMEG_4172|MSMEG_4172|D-ribose-binding periplasmic protein RbsB|372 AA	1	2	2	2	2	2	2	2	2	2	2	2	2	1	2	2	2	2	2	2	2	2	2	1	2	2	2	2	2	2	2	2	2	1	7	7	7	39.513	372	372	0	6.1252	By MS/MS	By MS/MS
MSMEG_4175|MSMEG_4175|transcriptional	MSMEG_4175|MSMEG_4175|transcriptional	1	1	1	MSMEG_4175|MSMEG_4175|transcriptional regulator, ArsR family protein|105 AA	1	1	1	1	1	0	1	1	1	1	1	1	1	0	1	0	1	1	1	1	1	1	1	0	1	0	1	1	1	1	1	1	1	0	10.5	10.5	10.5	12.217	105	105	0.0040614	2.2459	By matching
MSMEG_4176|MSMEG_4176|conserved	MSMEG_4176|MSMEG_4176|conserved	3	3	3	MSMEG_4176|MSMEG_4176|conserved hypothetical protein|170 AA	1	3	3	3	1	3	3	3	3	2	2	3	3	3	1	3	3	3	3	2	2	3	3	3	1	3	3	3	3	2	2	3	3	3	23.5	23.5	23.5	19.243	170	170	0	10.825	By MS/MS	By MS/MS
MSMEG_4180|hisG|ATP	MSMEG_4180|hisG|ATP	11	11	11	MSMEG_4180|hisG|ATP phosphoribosyltransferase|288 AA	1	11	11	11	9	10	10	10	11	11	9	10	11	11	9	10	10	10	11	11	9	10	11	11	9	10	10	10	11	11	9	10	11	11	54.2	54.2	54.2	30.815	288	288	0	73.713	By MS/MS	By MS/MS
MSMEG_4181|MSMEG_4181|phosphoribosyl-ATP	MSMEG_4181|MSMEG_4181|phosphoribosyl-ATP	2	2	2	MSMEG_4181|MSMEG_4181|phosphoribosyl-ATP pyrophosphohydrolase|93 AA	1	2	2	2	2	2	2	2	2	2	2	2	2	2	2	2	2	2	2	2	2	2	2	2	2	2	2	2	2	2	2	2	2	2	22.6	22.6	22.6	10.222	93	93	0	51.635	By MS/MS	By MS/MS
MSMEG_4183|MSMEG_4183|phosphoglycolate	MSMEG_4183|MSMEG_4183|phosphoglycolate	3	3	3	MSMEG_4183|MSMEG_4183|phosphoglycolate phosphatase, chromosomal|225 AA	1	3	3	3	3	3	2	2	2	2	3	3	2	2	3	3	2	2	2	2	3	3	2	2	3	3	2	2	2	2	3	3	2	2	15.6	15.6	15.6	24.111	225	225	0	22.992	By MS/MS	By MS/MS
MSMEG_4185|metH|methionine	MSMEG_4185|metH|methionine	29	29	29	MSMEG_4185|metH|methionine synthase|1246 AA	1	29	29	29	16	22	24	25	20	23	22	20	22	25	16	22	24	25	20	23	22	20	22	25	16	22	24	25	20	23	22	20	22	25	35.2	35.2	35.2	137	1246	1246	0	182.56	By MS/MS	By MS/MS
MSMEG_4187|MSMEG_4187|conserved	MSMEG_4187|MSMEG_4187|conserved	4	4	4	MSMEG_4187|MSMEG_4187|conserved hypothetical protein|485 AA	1	4	4	4	0	1	2	3	2	2	2	3	2	2	0	1	2	3	2	2	2	3	2	2	0	1	2	3	2	2	2	3	2	2	10.9	10.9	10.9	53.738	485	485	0	40.849		By matching
MSMEG_4188|MSMEG_4188|short	MSMEG_4188|MSMEG_4188|short	3	3	3	MSMEG_4188|MSMEG_4188|short chain dehydrogenase|295 AA	1	3	3	3	3	3	3	3	3	3	2	3	2	3	3	3	3	3	3	3	2	3	2	3	3	3	3	3	3	3	2	3	2	3	10.8	10.8	10.8	31.128	295	295	0	9.568	By MS/MS	By MS/MS
MSMEG_4189|cysS|cysteinyl-tRNA	MSMEG_4189|cysS|cysteinyl-tRNA	14	14	14	MSMEG_4189|cysS|cysteinyl-tRNA synthetase|412 AA	1	14	14	14	11	13	12	13	11	12	11	12	13	12	11	13	12	13	11	12	11	12	13	12	11	13	12	13	11	12	11	12	13	12	52.2	52.2	52.2	45.398	412	412	0	47.487	By MS/MS	By MS/MS
MSMEG_4190|MSMEG_4190|inositol	MSMEG_4190|MSMEG_4190|inositol	2	2	2	MSMEG_4190|MSMEG_4190|inositol monophosphatase family protein|253 AA	1	2	2	2	2	0	2	2	1	0	0	2	2	2	2	0	2	2	1	0	0	2	2	2	2	0	2	2	1	0	0	2	2	2	12.6	12.6	12.6	27.542	253	253	0	10.752	By matching
MSMEG_4192|MSMEG_4192|conserved	MSMEG_4192|MSMEG_4192|conserved	3	3	3	MSMEG_4192|MSMEG_4192|conserved hypothetical protein|195 AA	1	3	3	3	2	2	2	3	3	3	3	2	3	3	2	2	2	3	3	3	3	2	3	3	2	2	2	3	3	3	3	2	3	3	17.4	17.4	17.4	21.165	195	195	0	19.85	By matching	By MS/MS
MSMEG_4193|MSMEG_4193|phosphoglycerate	MSMEG_4193|MSMEG_4193|phosphoglycerate	8	8	8	MSMEG_4193|MSMEG_4193|phosphoglycerate mutase family protein|223 AA	1	8	8	8	6	6	7	8	7	7	7	7	8	8	6	6	7	8	7	7	7	7	8	8	6	6	7	8	7	7	7	7	8	8	48.4	48.4	48.4	23.852	223	223	0	118.09	By MS/MS	By MS/MS
MSMEG_4195|MSMEG_4195|conserved	MSMEG_4195|MSMEG_4195|conserved	4	4	4	MSMEG_4195|MSMEG_4195|conserved hypothetical protein|101 AA	1	4	4	4	3	3	3	3	4	4	4	4	4	3	3	3	3	3	4	4	4	4	4	3	3	3	3	3	4	4	4	4	4	3	38.6	38.6	38.6	10.83	101	101	0	13.257	By MS/MS	By MS/MS
MSMEG_4196|MSMEG_4196|LppL	MSMEG_4196|MSMEG_4196|LppL	2	2	2	MSMEG_4196|MSMEG_4196|LppL protein|346 AA	1	2	2	2	0	0	0	1	1	0	0	0	2	0	0	0	0	1	1	0	0	0	2	0	0	0	0	1	1	0	0	0	2	0	8.1	8.1	8.1	35.069	346	346	0	5.1165
MSMEG_4199|MSMEG_4199|conserved	MSMEG_4199|MSMEG_4199|conserved	4	4	4	MSMEG_4199|MSMEG_4199|conserved hypothetical protein|173 AA	1	4	4	4	3	4	3	3	3	2	4	3	3	3	3	4	3	3	3	2	4	3	3	3	3	4	3	3	3	2	4	3	3	3	34.1	34.1	34.1	18.061	173	173	0	11.762	By MS/MS	By MS/MS
MSMEG_4200|MSMEG_4200|peptidase	MSMEG_4200|MSMEG_4200|peptidase	14	14	14	MSMEG_4200|MSMEG_4200|peptidase M20|444 AA	1	14	14	14	10	14	12	12	12	12	11	11	12	13	10	14	12	12	12	12	11	11	12	13	10	14	12	12	12	12	11	11	12	13	47.7	47.7	47.7	47.855	444	444	0	197.2	By MS/MS	By MS/MS
MSMEG_4207|MSMEG_4207|universal	MSMEG_4207|MSMEG_4207|universal	4	4	4	MSMEG_4207|MSMEG_4207|universal stress protein family protein|130 AA	1	4	4	4	1	4	4	4	2	4	3	4	3	3	1	4	4	4	2	4	3	4	3	3	1	4	4	4	2	4	3	4	3	3	47.7	47.7	47.7	13.96	130	130	0	72.226	By matching	By MS/MS
MSMEG_4210|MSMEG_4210|secreted	MSMEG_4210|MSMEG_4210|secreted	12	12	12	MSMEG_4210|MSMEG_4210|secreted protein|327 AA	1	12	12	12	6	10	10	10	7	9	5	9	7	10	6	10	10	10	7	9	5	9	7	10	6	10	10	10	7	9	5	9	7	10	55	55	55	34.566	327	327	0	135.11	By MS/MS	By MS/MS
MSMEG_4214|MSMEG_4214|glutamine	MSMEG_4214|MSMEG_4214|glutamine	5	5	5	MSMEG_4214|MSMEG_4214|glutamine amidotransferase|240 AA	1	5	5	5	1	1	0	4	3	2	3	4	3	4	1	1	0	4	3	2	3	4	3	4	1	1	0	4	3	2	3	4	3	4	26.7	26.7	26.7	26.334	240	240	0	9.0424	By MS/MS	By matching
MSMEG_4217|MSMEG_4217|DivIVA	MSMEG_4217|MSMEG_4217|DivIVA	16	16	16	MSMEG_4217|MSMEG_4217|DivIVA protein|272 AA	1	16	16	16	14	16	14	15	14	15	15	16	16	15	14	16	14	15	14	15	15	16	16	15	14	16	14	15	14	15	15	16	16	15	66.9	66.9	66.9	29.544	272	272	0	323.31	By MS/MS	By MS/MS
MSMEG_4219|MSMEG_4219|conserved	MSMEG_4219|MSMEG_4219|conserved	2	2	2	MSMEG_4219|MSMEG_4219|conserved hypothetical protein|214 AA	1	2	2	2	2	2	2	1	2	2	1	2	1	2	2	2	2	1	2	2	1	2	1	2	2	2	2	1	2	2	1	2	1	2	11.2	11.2	11.2	24.166	214	214	0	4.4881	By MS/MS	By MS/MS
MSMEG_4220|MSMEG_4220|conserved	MSMEG_4220|MSMEG_4220|conserved	4	4	4	MSMEG_4220|MSMEG_4220|conserved hypothetical protein|291 AA	1	4	4	4	3	2	3	2	3	3	3	3	1	3	3	2	3	2	3	3	3	3	1	3	3	2	3	2	3	3	3	3	1	3	22.7	22.7	22.7	30.615	291	291	0	9.4105	By MS/MS	By matching
MSMEG_4221|MSMEG_4221|conserved	MSMEG_4221|MSMEG_4221|conserved	3	3	3	MSMEG_4221|MSMEG_4221|conserved hypothetical protein|237 AA	1	3	3	3	2	2	3	3	3	2	2	2	2	3	2	2	3	3	3	2	2	2	2	3	2	2	3	3	3	2	2	2	2	3	30.4	30.4	30.4	24.597	237	237	0	7.3768	By MS/MS	By MS/MS
MSMEG_4222|ftsZ|cell	MSMEG_4222|ftsZ|cell	14	14	14	MSMEG_4222|ftsZ|cell division protein FtsZ|385 AA	1	14	14	14	12	13	14	14	13	12	11	11	13	12	12	13	14	14	13	12	11	11	13	12	12	13	14	14	13	12	11	11	13	12	63.6	63.6	63.6	39.134	385	385	0	295.31	By MS/MS	By MS/MS
MSMEG_4229|murD|UDP-N-acetylmuramoylalanine--D-glutamate	MSMEG_4229|murD|UDP-N-acetylmuramoylalanine--D-glutamate	3	3	3	MSMEG_4229|murD|UDP-N-acetylmuramoylalanine--D-glutamate ligase|493 AA	1	3	3	3	2	1	3	3	1	2	2	3	2	2	2	1	3	3	1	2	2	3	2	2	2	1	3	3	1	2	2	3	2	2	13.2	13.2	13.2	49.558	493	493	0	8.7488	By MS/MS	By MS/MS
MSMEG_4231|MSMEG_4231|UDP-N-acetylmuramoyl-tripeptide--D-alanyl-D-	MSMEG_4231|MSMEG_4231|UDP-N-acetylmuramoyl-tripeptide--D-alanyl-D-	5	5	5	MSMEG_4231|MSMEG_4231|UDP-N-acetylmuramoyl-tripeptide--D-alanyl-D- alanine ligase|509 AA	1	5	5	5	3	3	5	5	3	4	3	4	3	4	3	3	5	5	3	4	3	4	3	4	3	3	5	5	3	4	3	4	3	4	14.5	14.5	14.5	51.664	509	509	0	14.092	By MS/MS	By MS/MS
MSMEG_4232|MSMEG_4232|UDP-N-acetylmuramoylalanyl-D-glutamate-2,	MSMEG_4232|MSMEG_4232|UDP-N-acetylmuramoylalanyl-D-glutamate-2,	11	11	11	MSMEG_4232|MSMEG_4232|UDP-N-acetylmuramoylalanyl-D-glutamate-2, 6-diaminopimelate ligase|520 AA	1	11	11	11	5	9	8	10	11	6	7	9	8	10	5	9	8	10	11	6	7	9	8	10	5	9	8	10	11	6	7	9	8	10	41.7	41.7	41.7	53.132	520	520	0	61.844	By MS/MS	By MS/MS
MSMEG_4235|mraW|S-adenosyl-methyltransferase	MSMEG_4235|mraW|S-adenosyl-methyltransferase	3	3	3	MSMEG_4235|mraW|S-adenosyl-methyltransferase MraW|326 AA	1	3	3	3	3	3	2	3	2	3	1	2	2	1	3	3	2	3	2	3	1	2	2	1	3	3	2	3	2	3	1	2	2	1	8.6	8.6	8.6	35.448	326	326	0	3.2798	By matching	By matching
MSMEG_4236|mraZ|MraZ	MSMEG_4236|mraZ|MraZ	3	3	3	MSMEG_4236|mraZ|MraZ protein|143 AA	1	3	3	3	3	2	3	3	3	1	3	2	2	3	3	2	3	3	3	1	3	2	2	3	3	2	3	3	3	1	3	2	2	3	21.7	21.7	21.7	16.1	143	143	0	5.1038	By MS/MS	By MS/MS
MSMEG_4237|MSMEG_4237|probable	MSMEG_4237|MSMEG_4237|probable	1	1	1	MSMEG_4237|MSMEG_4237|probable conserved transmembrane protein|133 AA	1	1	1	1	1	1	0	1	1	1	0	0	1	1	1	1	0	1	1	1	0	0	1	1	1	1	0	1	1	1	0	0	1	1	11.3	11.3	11.3	14.346	133	133	0.0070796	1.9522	By MS/MS	By matching
MSMEG_4240|MSMEG_4240|polyprenyl	MSMEG_4240|MSMEG_4240|polyprenyl	8	8	8	MSMEG_4240|MSMEG_4240|polyprenyl synthetase|362 AA	1	8	8	8	7	8	8	7	7	8	7	8	8	7	7	8	8	7	7	8	7	8	8	7	7	8	8	7	7	8	7	8	8	7	35.1	35.1	35.1	38.775	362	362	0	110.99	By MS/MS	By MS/MS
MSMEG_4242|MSMEG_4242|transcriptional	MSMEG_4242|MSMEG_4242|transcriptional	5	5	5	MSMEG_4242|MSMEG_4242|transcriptional regulatory protein|134 AA	1	5	5	5	3	3	3	4	3	4	4	5	4	4	3	3	3	4	3	4	4	5	4	4	3	3	3	4	3	4	4	5	4	4	55.2	55.2	55.2	14.804	134	134	0	20.699	By MS/MS	By MS/MS
MSMEG_4244|MSMEG_4244|3-deoxy-7-phosphoheptulonate	MSMEG_4244|MSMEG_4244|3-deoxy-7-phosphoheptulonate	5	5	5	MSMEG_4244|MSMEG_4244|3-deoxy-7-phosphoheptulonate synthase|464 AA	1	5	5	5	4	3	5	4	3	4	3	2	4	3	4	3	5	4	3	4	3	2	4	3	4	3	5	4	3	4	3	2	4	3	16.6	16.6	16.6	50.731	464	464	0	17.061	By MS/MS	By MS/MS
MSMEG_4249|MSMEG_4249|conserved	MSMEG_4249|MSMEG_4249|conserved	2	2	2	MSMEG_4249|MSMEG_4249|conserved hypothetical protein|135 AA	1	2	2	2	2	1	1	2	2	1	2	2	1	1	2	1	1	2	2	1	2	2	1	1	2	1	1	2	2	1	2	2	1	1	16.3	16.3	16.3	13.473	135	135	0.00093197	2.8128	By MS/MS	By matching
MSMEG_4251|MSMEG_4251|cyclase/dehydrase|145	MSMEG_4251|MSMEG_4251|cyclase/dehydrase|145	4	4	4	MSMEG_4251|MSMEG_4251|cyclase/dehydrase|145 AA	1	4	4	4	3	2	3	4	3	3	2	4	3	3	3	2	3	4	3	3	2	4	3	3	3	2	3	4	3	3	2	4	3	3	37.9	37.9	37.9	16.211	145	145	0	22.879	By MS/MS	By MS/MS
MSMEG_4254|MSMEG_4254|AMP-binding	MSMEG_4254|MSMEG_4254|AMP-binding	14	14	14	MSMEG_4254|MSMEG_4254|AMP-binding enzyme|599 AA	1	14	14	14	12	12	14	14	13	13	10	11	12	12	12	12	14	14	13	13	10	11	12	12	12	12	14	14	13	13	10	11	12	12	31.4	31.4	31.4	64.486	599	599	0	258.42	By MS/MS	By MS/MS
MSMEG_4256|MSMEG_4256|NLP/P60	MSMEG_4256|MSMEG_4256|NLP/P60	8	8	8	MSMEG_4256|MSMEG_4256|NLP/P60 family protein|381 AA	1	8	8	8	7	8	7	8	8	7	7	8	7	8	7	8	7	8	8	7	7	8	7	8	7	8	7	8	8	7	7	8	7	8	30.2	30.2	30.2	39.452	381	381	0	126.83	By MS/MS	By MS/MS
MSMEG_4257|MSMEG_4257|conserved	MSMEG_4257|MSMEG_4257|conserved	1	1	1	MSMEG_4257|MSMEG_4257|conserved hypothetical protein|123 AA	1	1	1	1	0	1	0	0	0	0	1	1	1	1	0	1	0	0	0	0	1	1	1	1	0	1	0	0	0	0	1	1	1	1	13.8	13.8	13.8	13.884	123	123	0	34.004		By MS/MS
MSMEG_4258|trpD|anthranilate	MSMEG_4258|trpD|anthranilate	4	4	4	MSMEG_4258|trpD|anthranilate phosphoribosyltransferase|364 AA	1	4	4	4	3	2	3	2	2	3	2	2	2	2	3	2	3	2	2	3	2	2	2	2	3	2	3	2	2	3	2	2	2	2	17.6	17.6	17.6	37.518	364	364	0	76.267	By MS/MS	By matching
MSMEG_4260|MSMEG_4260|cytochrome	MSMEG_4260|MSMEG_4260|cytochrome	1	1	1	MSMEG_4260|MSMEG_4260|cytochrome c oxidase subunit 3|203 AA	1	1	1	1	1	1	1	1	1	1	1	1	1	1	1	1	1	1	1	1	1	1	1	1	1	1	1	1	1	1	1	1	1	1	6.9	6.9	6.9	22.181	203	203	0	4.3874	By MS/MS	By matching
MSMEG_4261|MSMEG_4261|ubiquinol-cytochrome	MSMEG_4261|MSMEG_4261|ubiquinol-cytochrome	3	3	3	MSMEG_4261|MSMEG_4261|ubiquinol-cytochrome c reductase cytochrome c subunit|268 AA	1	3	3	3	2	2	2	2	1	2	2	2	2	2	2	2	2	2	1	2	2	2	2	2	2	2	2	2	1	2	2	2	2	2	19	19	19	27.846	268	268	0	28.283	By MS/MS	By MS/MS
MSMEG_4262|MSMEG_4262|ubiquinol-cytochrome	MSMEG_4262|MSMEG_4262|ubiquinol-cytochrome	5	5	5	MSMEG_4262|MSMEG_4262|ubiquinol-cytochrome c reductase iron-sulfur subunit|408 AA	1	5	5	5	5	5	4	3	5	5	5	5	5	5	5	5	4	3	5	5	5	5	5	5	5	5	4	3	5	5	5	5	5	5	18.1	18.1	18.1	44.817	408	408	0	50.99	By MS/MS	By MS/MS
MSMEG_4263|MSMEG_4263|ubiquinol-cytochrome	MSMEG_4263|MSMEG_4263|ubiquinol-cytochrome	1	1	1	MSMEG_4263|MSMEG_4263|ubiquinol-cytochrome c reductase cytochrome b subunit|546 AA	1	1	1	1	1	0	0	1	1	0	1	0	1	1	1	0	0	1	1	0	1	0	1	1	1	0	0	1	1	0	1	0	1	1	2.2	2.2	2.2	60.21	546	546	0	6.844	By MS/MS
MSMEG_4265|MSMEG_4265|MmpS3	MSMEG_4265|MSMEG_4265|MmpS3	3	3	3	MSMEG_4265|MSMEG_4265|MmpS3 protein|297 AA	1	3	3	3	3	3	3	3	3	3	3	3	3	3	3	3	3	3	3	3	3	3	3	3	3	3	3	3	3	3	3	3	3	3	21.5	21.5	21.5	30.797	297	297	0	29.81	By MS/MS	By MS/MS
MSMEG_4268|MSMEG_4268|cytochrome	MSMEG_4268|MSMEG_4268|cytochrome	7	7	7	MSMEG_4268|MSMEG_4268|cytochrome c oxidase subunit 2|341 AA	1	7	7	7	6	5	6	6	6	6	5	6	7	7	6	5	6	6	6	6	5	6	7	7	6	5	6	6	6	6	5	6	7	7	30.8	30.8	30.8	38.039	341	341	0	84.831	By MS/MS	By MS/MS
MSMEG_4269|asnB|asparagine	MSMEG_4269|asnB|asparagine	5	5	5	MSMEG_4269|asnB|asparagine synthase (glutamine-hydrolyzing)|658 AA	1	5	5	5	3	2	3	4	2	2	4	4	4	5	3	2	3	4	2	2	4	4	4	5	3	2	3	4	2	2	4	4	4	5	11.4	11.4	11.4	73.263	658	658	0	5.8992	By MS/MS	By matching
MSMEG_4270|MSMEG_4270|adenosine	MSMEG_4270|MSMEG_4270|adenosine	13	13	13	MSMEG_4270|MSMEG_4270|adenosine kinase|325 AA	1	13	13	13	7	11	9	12	10	8	7	12	13	10	7	11	9	12	10	8	7	12	13	10	7	11	9	12	10	8	7	12	13	10	62.5	62.5	62.5	34.854	325	325	0	88.355	By MS/MS	By MS/MS
MSMEG_4272|MSMEG_4272|HesB/YadR/YfhF	MSMEG_4272|MSMEG_4272|HesB/YadR/YfhF	8	8	8	MSMEG_4272|MSMEG_4272|HesB/YadR/YfhF family protein|118 AA	1	8	8	8	8	7	7	8	7	7	8	8	8	8	8	7	7	8	7	7	8	8	8	8	8	7	7	8	7	7	8	8	8	8	97.5	97.5	97.5	12.395	118	118	0	323.31	By MS/MS	By MS/MS
MSMEG_4274|cobU|Cobinamide	MSMEG_4274|cobU|Cobinamide	4	4	4	MSMEG_4274|cobU|Cobinamide kinase / cobinamide phosphate guanyltransferase|177 AA	1	4	4	4	4	4	4	4	4	4	4	3	4	3	4	4	4	4	4	4	4	3	4	3	4	4	4	4	4	4	4	3	4	3	24.9	24.9	24.9	18.62	177	177	0	16.955	By MS/MS	By MS/MS
MSMEG_4275|MSMEG_4275|nicotinate-nucleotide--dimethylbenzimidazole	MSMEG_4275|MSMEG_4275|nicotinate-nucleotide--dimethylbenzimidazole	4	4	4	MSMEG_4275|MSMEG_4275|nicotinate-nucleotide--dimethylbenzimidazole phosphoribosyltransferase|351 AA	1	4	4	4	3	4	2	3	2	3	2	4	4	3	3	4	2	3	2	3	2	4	4	3	3	4	2	3	2	3	2	4	4	3	20.5	20.5	20.5	35.726	351	351	0	56.252	By MS/MS	By MS/MS
MSMEG_4276|ilvE|branched-chain	MSMEG_4276|ilvE|branched-chain	14	14	14	MSMEG_4276|ilvE|branched-chain amino acid aminotransferase|368 AA	1	14	14	14	7	11	8	12	9	8	12	14	12	13	7	11	8	12	9	8	12	14	12	13	7	11	8	12	9	8	12	14	12	13	52.7	52.7	52.7	39.836	368	368	0	323.31	By MS/MS	By MS/MS
MSMEG_4278|gcvT|glycine	MSMEG_4278|gcvT|glycine	14	14	14	MSMEG_4278|gcvT|glycine cleavage system T protein|365 AA	1	14	14	14	11	10	9	11	12	10	11	11	14	13	11	10	9	11	12	10	11	11	14	13	11	10	9	11	12	10	11	11	14	13	57.8	57.8	57.8	38.776	365	365	0	103.43	By MS/MS	By MS/MS
MSMEG_4281|MSMEG_4281|cytosol	MSMEG_4281|MSMEG_4281|cytosol	15	15	15	MSMEG_4281|MSMEG_4281|cytosol aminopeptidase|519 AA	1	15	15	15	12	14	13	11	14	13	12	11	12	14	12	14	13	11	14	13	12	11	12	14	12	14	13	11	14	13	12	11	12	14	43	43	43	53.724	519	519	0	110.29	By MS/MS	By MS/MS
MSMEG_4283|sucB|2-oxoglutarate	MSMEG_4283|sucB|2-oxoglutarate	19	19	19	MSMEG_4283|sucB|2-oxoglutarate dehydrogenase, E2 component, dihydrolipoamide succinyltransferase|585 AA	1	19	19	19	15	17	16	17	17	18	18	17	18	16	15	17	16	17	17	18	18	17	18	16	15	17	16	17	17	18	18	17	18	16	46.8	46.8	46.8	61.029	585	585	0	248.12	By MS/MS	By MS/MS
MSMEG_4285|lipB|lipoyltransferase|228	MSMEG_4285|lipB|lipoyltransferase|228	4	4	4	MSMEG_4285|lipB|lipoyltransferase|228 AA	1	4	4	4	2	3	2	3	2	1	3	2	2	2	2	3	2	3	2	1	3	2	2	2	2	3	2	3	2	1	3	2	2	2	18.9	18.9	18.9	24.413	228	228	0	50.829	By MS/MS	By MS/MS
MSMEG_4286|lipA|lipoic	MSMEG_4286|lipA|lipoic	2	2	2	MSMEG_4286|lipA|lipoic acid synthetase|314 AA	1	2	2	2	1	2	2	2	2	2	2	1	2	2	1	2	2	2	2	2	2	1	2	2	1	2	2	2	2	2	2	1	2	2	7.6	7.6	7.6	35.412	314	314	0	6.9731	By matching	By matching
MSMEG_4287|MSMEG_4287|integral	MSMEG_4287|MSMEG_4287|integral	3	3	3	MSMEG_4287|MSMEG_4287|integral membrane protein|250 AA	1	3	3	3	3	2	2	3	1	2	2	2	2	2	3	2	2	3	1	2	2	2	2	2	3	2	2	3	1	2	2	2	2	2	16.8	16.8	16.8	26.931	250	250	0	22.968	By MS/MS	By MS/MS
MSMEG_4290|glnA|glutamine	MSMEG_4290|glnA|glutamine	23	23	23	MSMEG_4290|glnA|glutamine synthetase, type I|478 AA	1	23	23	23	17	19	19	20	19	19	19	19	22	21	17	19	19	20	19	19	19	19	22	21	17	19	19	20	19	19	19	19	22	21	71.5	71.5	71.5	53.591	478	478	0	323.31	By MS/MS	By MS/MS
MSMEG_4294|glnA|glutamine	MSMEG_4294|glnA|glutamine	3	3	3	MSMEG_4294|glnA|glutamine synthetase, type I|446 AA	1	3	3	3	0	0	0	2	0	1	2	0	1	3	0	0	0	2	0	1	2	0	1	3	0	0	0	2	0	1	2	0	1	3	8.5	8.5	8.5	49.824	446	446	0	5.7735
MSMEG_4295|MSMEG_4295|hydrolase,	MSMEG_4295|MSMEG_4295|hydrolase,	13	13	13	MSMEG_4295|MSMEG_4295|hydrolase, alpha/beta fold family protein|500 AA	1	13	13	13	11	13	11	11	11	12	11	11	10	10	11	13	11	11	11	12	11	11	10	10	11	13	11	11	11	12	11	11	10	10	47.2	47.2	47.2	52.844	500	500	0	108.53	By MS/MS	By MS/MS
MSMEG_4296|MSMEG_4296|protease|510	MSMEG_4296|MSMEG_4296|protease|510	11	11	11	MSMEG_4296|MSMEG_4296|protease|510 AA	1	11	11	11	10	9	10	9	9	10	9	9	8	7	10	9	10	9	9	10	9	9	8	7	10	9	10	9	9	10	9	9	8	7	34.5	34.5	34.5	54.106	510	510	0	62.646	By MS/MS	By MS/MS
MSMEG_4298|panB|3-methyl-2-oxobutanoate	MSMEG_4298|panB|3-methyl-2-oxobutanoate	11	11	11	MSMEG_4298|panB|3-methyl-2-oxobutanoate hydroxymethyltransferase|287 AA	1	11	11	11	11	11	11	11	11	11	10	11	11	11	11	11	11	11	11	11	10	11	11	11	11	11	11	11	11	11	10	11	11	11	79.4	79.4	79.4	30.059	287	287	0	323.31	By MS/MS	By MS/MS
MSMEG_4299|MSMEG_4299|enoyl-CoA	MSMEG_4299|MSMEG_4299|enoyl-CoA	8	8	8	MSMEG_4299|MSMEG_4299|enoyl-CoA hydratase/isomerase|261 AA	1	8	8	8	6	8	6	7	7	7	8	7	8	6	6	8	6	7	7	7	8	7	8	6	6	8	6	7	7	7	8	7	8	6	42.5	42.5	42.5	27.314	261	261	0	72.256	By MS/MS	By MS/MS
MSMEG_4301|MSMEG_4301|acyl-CoA	MSMEG_4301|MSMEG_4301|acyl-CoA	16	16	16	MSMEG_4301|MSMEG_4301|acyl-CoA synthase|594 AA	1	16	16	16	8	11	12	15	13	10	9	12	15	13	8	11	12	15	13	10	9	12	15	13	8	11	12	15	13	10	9	12	15	13	44.3	44.3	44.3	63.421	594	594	0	54.053	By MS/MS	By MS/MS
MSMEG_4302|MSMEG_4302|adenylate	MSMEG_4302|MSMEG_4302|adenylate	7	7	7	MSMEG_4302|MSMEG_4302|adenylate cyclase, putative|508 AA	1	7	7	7	4	3	3	7	5	6	6	5	5	5	4	3	3	7	5	6	6	5	5	5	4	3	3	7	5	6	6	5	5	5	23.6	23.6	23.6	55.597	508	508	0	35.006	By MS/MS	By MS/MS
MSMEG_4303|MSMEG_4303|methyltransferase|518	MSMEG_4303|MSMEG_4303|methyltransferase|518	1	1	1	MSMEG_4303|MSMEG_4303|methyltransferase|518 AA	1	1	1	1	0	1	1	1	1	0	1	1	1	1	0	1	1	1	1	0	1	1	1	1	0	1	1	1	1	0	1	1	1	1	5.4	5.4	5.4	54.728	518	518	0	7.0159		By matching
MSMEG_4304|MSMEG_4304|regulatory	MSMEG_4304|MSMEG_4304|regulatory	2	2	2	MSMEG_4304|MSMEG_4304|regulatory protein|192 AA	1	2	2	2	1	2	2	2	2	2	2	2	2	2	1	2	2	2	2	2	2	2	2	2	1	2	2	2	2	2	2	2	2	2	12.5	12.5	12.5	21.434	192	192	0.002731	2.4097	By matching	By MS/MS
MSMEG_4305|MSMEG_4305|phosphoglycerate	MSMEG_4305|MSMEG_4305|phosphoglycerate	2	2	2	MSMEG_4305|MSMEG_4305|phosphoglycerate mutase|365 AA	1	2	2	2	2	2	2	1	2	1	1	2	2	1	2	2	2	1	2	1	1	2	2	1	2	2	2	1	2	1	1	2	2	1	7.1	7.1	7.1	39.032	365	365	0	3.7248	By MS/MS	By MS/MS
MSMEG_4306|MSMEG_4306|conserved	MSMEG_4306|MSMEG_4306|conserved	14	14	14	MSMEG_4306|MSMEG_4306|conserved hypothetical protein|242 AA	1	14	14	14	13	13	14	14	14	14	14	13	14	13	13	13	14	14	14	14	14	13	14	13	13	13	14	14	14	14	14	13	14	13	61.6	61.6	61.6	27.142	242	242	0	323.31	By MS/MS	By MS/MS
MSMEG_4307|MSMEG_4307|conserved	MSMEG_4307|MSMEG_4307|conserved	9	9	9	MSMEG_4307|MSMEG_4307|conserved hypothetical protein|383 AA	1	9	9	9	6	7	5	8	5	6	6	8	5	7	6	7	5	8	5	6	6	8	5	7	6	7	5	8	5	6	6	8	5	7	41.8	41.8	41.8	40.037	383	383	0	40.629	By MS/MS	By MS/MS
MSMEG_4308|MSMEG_4308|5'-nucleotidase|230	MSMEG_4308|MSMEG_4308|5'-nucleotidase|230	2	2	2	MSMEG_4308|MSMEG_4308|5-nucleotidase|230 AA	1	2	2	2	0	1	1	1	0	0	0	1	1	0	0	1	1	1	0	0	0	1	1	0	0	1	1	1	0	0	0	1	1	0	22.2	22.2	22.2	24.195	230	230	0	7.7438		By MS/MS
MSMEG_4309|MSMEG_4309|Low	MSMEG_4309|MSMEG_4309|Low	4	4	4	MSMEG_4309|MSMEG_4309|Low molecular weight protein-tyrosine-phosphatase|163 AA	1	4	4	4	2	2	2	2	2	2	2	3	3	3	2	2	2	2	2	2	2	3	3	3	2	2	2	2	2	2	2	3	3	3	35	35	35	17.72	163	163	0	7.3459	By MS/MS	By MS/MS
MSMEG_4313|MSMEG_4313|glyoxalase/bleomycin	MSMEG_4313|MSMEG_4313|glyoxalase/bleomycin	8	8	8	MSMEG_4313|MSMEG_4313|glyoxalase/bleomycin resistance protein/dioxygenase|138 AA	1	8	8	8	8	8	8	8	8	8	7	8	8	8	8	8	8	8	8	8	7	8	8	8	8	8	8	8	8	8	7	8	8	8	80.4	80.4	80.4	14.925	138	138	0	47.538	By MS/MS	By MS/MS
MSMEG_4320|MSMEG_4320|alkyl	MSMEG_4320|MSMEG_4320|alkyl	6	6	6	MSMEG_4320|MSMEG_4320|alkyl hydroperoxide reductase/ Thiol specific antioxidant/ Mal allergen|156 AA	1	6	6	6	4	5	5	6	5	4	5	4	4	6	4	5	5	6	5	4	5	4	4	6	4	5	5	6	5	4	5	4	4	6	50	50	50	17.337	156	156	0	22.249	By MS/MS	By MS/MS
MSMEG_4321|MSMEG_4321|conserved	MSMEG_4321|MSMEG_4321|conserved	5	5	5	MSMEG_4321|MSMEG_4321|conserved hypothetical protein|145 AA	1	5	5	5	4	5	4	5	4	4	5	5	5	5	4	5	4	5	4	4	5	5	5	5	4	5	4	5	4	4	5	5	5	5	57.2	57.2	57.2	15.628	145	145	0	117.01	By MS/MS	By MS/MS
MSMEG_4323|MSMEG_4323|pyruvate	MSMEG_4323|MSMEG_4323|pyruvate	23	23	23	MSMEG_4323|MSMEG_4323|pyruvate dehydrogenase E1 component|929 AA	1	23	23	23	15	19	20	21	18	21	19	20	22	22	15	19	20	21	18	21	19	20	22	22	15	19	20	21	18	21	19	20	22	22	38.6	38.6	38.6	103.08	929	929	0	323.31	By MS/MS	By MS/MS
MSMEG_4325|MSMEG_4325|malonyl	MSMEG_4325|MSMEG_4325|malonyl	9	9	9	MSMEG_4325|MSMEG_4325|malonyl CoA-acyl carrier protein transacylase|290 AA	1	9	9	9	9	9	9	9	9	9	9	9	9	9	9	9	9	9	9	9	9	9	9	9	9	9	9	9	9	9	9	9	9	9	39.3	39.3	39.3	29.675	290	290	0	123.14	By MS/MS	By MS/MS
MSMEG_4326|acpP|acyl	MSMEG_4326|acpP|acyl	5	5	5	MSMEG_4326|acpP|acyl carrier protein|99 AA	1	5	5	5	4	5	5	5	4	4	4	5	4	5	4	5	5	5	4	4	4	5	4	5	4	5	5	5	4	4	4	5	4	5	64.6	64.6	64.6	10.737	99	99	0	68.435	By MS/MS	By MS/MS
MSMEG_4327|MSMEG_4327|3-oxoacyl-[acyl-carrier-protein]	MSMEG_4327|MSMEG_4327|3-oxoacyl-[acyl-carrier-protein]	19	19	19	MSMEG_4327|MSMEG_4327|3-oxoacyl-[acyl-carrier-protein] synthase 1|416 AA	1	19	19	19	12	16	17	17	17	15	17	18	17	16	12	16	17	17	17	15	17	18	17	16	12	16	17	17	17	15	17	18	17	16	70.4	70.4	70.4	43.786	416	416	0	189.62	By MS/MS	By MS/MS
MSMEG_4328|MSMEG_4328|3-oxoacyl-[acyl-carrier-protein]	MSMEG_4328|MSMEG_4328|3-oxoacyl-[acyl-carrier-protein]	16	16	16	MSMEG_4328|MSMEG_4328|3-oxoacyl-[acyl-carrier-protein] synthase 2|417 AA	1	16	16	16	12	13	12	12	13	12	12	14	12	13	12	13	12	12	13	12	12	14	12	13	12	13	12	12	13	12	12	14	12	13	65.5	65.5	65.5	43.734	417	417	0	141.58	By MS/MS	By MS/MS
MSMEG_4329|MSMEG_4329|propionyl-CoA	MSMEG_4329|MSMEG_4329|propionyl-CoA	8	8	8	MSMEG_4329|MSMEG_4329|propionyl-CoA carboxylase beta chain|474 AA	1	8	8	8	6	6	8	8	6	7	7	7	7	8	6	6	8	8	6	7	7	7	7	8	6	6	8	8	6	7	7	7	7	8	21.5	21.5	21.5	50.246	474	474	0	20.439	By MS/MS	By MS/MS
MSMEG_4330|MSMEG_4330|short	MSMEG_4330|MSMEG_4330|short	3	3	3	MSMEG_4330|MSMEG_4330|short chain dehydrogenase|249 AA	1	3	3	3	2	2	3	2	2	3	2	2	2	2	2	2	3	2	2	3	2	2	2	2	2	2	3	2	2	3	2	2	2	2	14.9	14.9	14.9	26.405	249	249	0	15.123	By MS/MS	By MS/MS
MSMEG_4334|MSMEG_4334|flavoprotein|525	MSMEG_4334|MSMEG_4334|flavoprotein|525	2	2	2	MSMEG_4334|MSMEG_4334|flavoprotein|525 AA	1	2	2	2	0	0	2	2	1	0	0	1	1	1	0	0	2	2	1	0	0	1	1	1	0	0	2	2	1	0	0	1	1	1	7.4	7.4	7.4	54.915	525	525	0	6.9214
MSMEG_4337|MSMEG_4337|beta-lactamase|269	MSMEG_4337|MSMEG_4337|beta-lactamase|269	4	4	4	MSMEG_4337|MSMEG_4337|beta-lactamase|269 AA	1	4	4	4	3	3	3	4	4	3	3	4	4	4	3	3	3	4	4	3	3	4	4	4	3	3	3	4	4	3	3	4	4	4	30.1	30.1	30.1	28.337	269	269	0	124.52	By MS/MS	By MS/MS
MSMEG_4340|MSMEG_4340|NAD/mycothiol-dependent	MSMEG_4340|MSMEG_4340|NAD/mycothiol-dependent	14	14	14	MSMEG_4340|MSMEG_4340|NAD/mycothiol-dependent formaldehyde dehydrogenase|363 AA	1	14	14	14	9	11	11	13	12	10	10	12	13	13	9	11	11	13	12	10	10	12	13	13	9	11	11	13	12	10	10	12	13	13	68	68	68	38.404	363	363	0	162.65	By MS/MS	By MS/MS
MSMEG_4342|MSMEG_4342|metallo-beta-lactamase	MSMEG_4342|MSMEG_4342|metallo-beta-lactamase	5	5	5	MSMEG_4342|MSMEG_4342|metallo-beta-lactamase family protein|210 AA	1	5	5	5	4	5	5	5	5	5	5	5	5	5	4	5	5	5	5	5	5	5	5	5	4	5	5	5	5	5	5	5	5	5	33.8	33.8	33.8	22.338	210	210	0	48.88	By MS/MS	By MS/MS
MSMEG_4347|MSMEG_4347|conserved	MSMEG_4347|MSMEG_4347|conserved	2	2	2	MSMEG_4347|MSMEG_4347|conserved hypothetical protein|360 AA	1	2	2	2	0	0	1	1	0	1	1	1	0	0	0	0	1	1	0	1	1	1	0	0	0	0	1	1	0	1	1	1	0	0	6.1	6.1	6.1	39.833	360	360	0.0040632	2.2632
MSMEG_4349|MSMEG_4349|conserved	MSMEG_4349|MSMEG_4349|conserved	3	3	3	MSMEG_4349|MSMEG_4349|conserved hypothetical proline rich protein|592 AA	1	3	3	3	0	1	2	3	1	1	1	2	3	2	0	1	2	3	1	1	1	2	3	2	0	1	2	3	1	1	1	2	3	2	5.7	5.7	5.7	60.081	592	592	0	6.0029		By MS/MS
MSMEG_4351|MSMEG_4351|putative	MSMEG_4351|MSMEG_4351|putative	3	3	3	MSMEG_4351|MSMEG_4351|putative oxidoreductase YjgI|252 AA	1	3	3	3	2	3	3	3	3	3	3	3	3	3	2	3	3	3	3	3	3	3	3	3	2	3	3	3	3	3	3	3	3	3	14.3	14.3	14.3	25.376	252	252	0	4.2622	By MS/MS	By matching
MSMEG_4353|MSMEG_4353|conserved	MSMEG_4353|MSMEG_4353|conserved	5	5	5	MSMEG_4353|MSMEG_4353|conserved hypothetical protein|181 AA	1	5	5	5	4	5	3	4	4	4	5	4	4	5	4	5	3	4	4	4	5	4	4	5	4	5	3	4	4	4	5	4	4	5	39.8	39.8	39.8	19.321	181	181	0	15.895	By MS/MS	By MS/MS
MSMEG_4358|MSMEG_4358|D-beta-hydroxybutyrate	MSMEG_4358|MSMEG_4358|D-beta-hydroxybutyrate	5	5	5	MSMEG_4358|MSMEG_4358|D-beta-hydroxybutyrate dehydrogenase|246 AA	1	5	5	5	2	2	2	3	2	2	3	1	1	4	2	2	2	3	2	2	3	1	1	4	2	2	2	3	2	2	3	1	1	4	24.4	24.4	24.4	25.544	246	246	0	7.0402	By matching	By MS/MS
MSMEG_4361|MSMEG_4361|conserved	MSMEG_4361|MSMEG_4361|conserved	2	2	2	MSMEG_4361|MSMEG_4361|conserved hypothetical protein|80 AA	1	2	2	2	2	2	2	2	2	2	1	1	1	2	2	2	2	2	2	2	1	1	1	2	2	2	2	2	2	2	1	1	1	2	23.8	23.8	23.8	8.5704	80	80	0.0027199	2.3256	By matching	By matching
MSMEG_4362|MSMEG_4362|universal	MSMEG_4362|MSMEG_4362|universal	3	3	3	MSMEG_4362|MSMEG_4362|universal stress protein family protein|272 AA	1	3	3	3	1	2	1	1	2	1	1	0	1	1	1	2	1	1	2	1	1	0	1	1	1	2	1	1	2	1	1	0	1	1	18.8	18.8	18.8	28.073	272	272	0	2.9737	By matching	By MS/MS
MSMEG_4366|MSMEG_4366|serine/threonine-protein	MSMEG_4366|MSMEG_4366|serine/threonine-protein	2	2	2	MSMEG_4366|MSMEG_4366|serine/threonine-protein kinase PknD|525 AA	1	2	2	2	0	1	1	2	2	2	0	1	2	2	0	1	1	2	2	2	0	1	2	2	0	1	1	2	2	2	0	1	2	2	4.6	4.6	4.6	55.614	525	525	0	5.1651		By matching
MSMEG_4367|MSMEG_4367|formamidase|418	MSMEG_4367|MSMEG_4367|formamidase|418	13	13	13	MSMEG_4367|MSMEG_4367|formamidase|418 AA	1	13	13	13	10	12	12	13	12	12	12	12	13	12	10	12	12	13	12	12	12	12	13	12	10	12	12	13	12	12	12	12	13	12	46.4	46.4	46.4	44.496	418	418	0	158.79	By MS/MS	By MS/MS
MSMEG_4381|MSMEG_4381|amidase|337	MSMEG_4381|MSMEG_4381|amidase|337	7	7	7	MSMEG_4381|MSMEG_4381|amidase|337 AA	1	7	7	7	2	5	5	7	5	5	6	6	6	6	2	5	5	7	5	5	6	6	6	6	2	5	5	7	5	5	6	6	6	6	43.3	43.3	43.3	36.014	337	337	0	36.85	By matching	By MS/MS
MSMEG_4382|MSMEG_4382|dehydrogenase/reductase	MSMEG_4382|MSMEG_4382|dehydrogenase/reductase	4	4	4	MSMEG_4382|MSMEG_4382|dehydrogenase/reductase SDR family protein member 10|253 AA	1	4	4	4	3	3	4	3	3	3	3	4	4	4	3	3	4	3	3	3	3	4	4	4	3	3	4	3	3	3	3	4	4	4	17.4	17.4	17.4	25.825	253	253	0	13.061	By MS/MS	By MS/MS
MSMEG_4396|MSMEG_4396|isochorismatase	MSMEG_4396|MSMEG_4396|isochorismatase	5	5	5	MSMEG_4396|MSMEG_4396|isochorismatase hydrolase|247 AA	1	5	5	5	4	4	5	5	5	4	3	5	5	5	4	4	5	5	5	4	3	5	5	5	4	4	5	5	5	4	3	5	5	5	32	32	32	27.449	247	247	0	31.969	By MS/MS	By MS/MS
MSMEG_4399|MSMEG_4399|conserved	MSMEG_4399|MSMEG_4399|conserved	3	3	3	MSMEG_4399|MSMEG_4399|conserved hypothetical protein|125 AA	1	3	3	3	2	3	3	3	2	2	3	3	3	3	2	3	3	3	2	2	3	3	3	3	2	3	3	3	2	2	3	3	3	3	32.8	32.8	32.8	13.114	125	125	0	29.338	By MS/MS	By MS/MS
MSMEG_4401|MSMEG_4401|phosphonoacetaldehyde	MSMEG_4401|MSMEG_4401|phosphonoacetaldehyde	8	8	8	MSMEG_4401|MSMEG_4401|phosphonoacetaldehyde hydrolase|241 AA	1	8	8	8	7	7	6	7	6	7	6	7	7	7	7	7	6	7	6	7	6	7	7	7	7	7	6	7	6	7	6	7	7	7	49	49	49	25.117	241	241	0	93.487	By MS/MS	By MS/MS
MSMEG_4428|MSMEG_4428|conserved	MSMEG_4428|MSMEG_4428|conserved	2	2	2	MSMEG_4428|MSMEG_4428|conserved hypothetical protein|145 AA	1	2	2	2	2	2	2	1	0	2	2	1	2	1	2	2	2	1	0	2	2	1	2	1	2	2	2	1	0	2	2	1	2	1	17.9	17.9	17.9	15.855	145	145	0	18.376	By MS/MS	By matching
MSMEG_4437|ctaD|cytochrome	MSMEG_4437|ctaD|cytochrome	2	2	2	MSMEG_4437|ctaD|cytochrome c oxidase, subunit I|583 AA	1	2	2	2	0	1	2	2	2	2	2	1	1	1	0	1	2	2	2	2	2	1	1	1	0	1	2	2	2	2	2	1	1	1	6	6	6	64.789	583	583	0	7.4141		By MS/MS
MSMEG_4454|ltaE|L-threonine	MSMEG_4454|ltaE|L-threonine	5	5	5	MSMEG_4454|ltaE|L-threonine aldolase, low-specificity|338 AA	1	5	5	5	4	5	3	4	4	4	4	4	4	3	4	5	3	4	4	4	4	4	4	3	4	5	3	4	4	4	4	4	4	3	26.9	26.9	26.9	35.505	338	338	0	52.864	By MS/MS	By MS/MS
MSMEG_4463|MSMEG_4463|CalR5	MSMEG_4463|MSMEG_4463|CalR5	14	14	14	MSMEG_4463|MSMEG_4463|CalR5 protein|453 AA	1	14	14	14	10	11	12	13	12	11	11	13	14	12	10	11	12	13	12	11	11	13	14	12	10	11	12	13	12	11	11	13	14	12	58.3	58.3	58.3	48.567	453	453	0	169.04	By MS/MS	By MS/MS
MSMEG_4464|MSMEG_4464|modulator	MSMEG_4464|MSMEG_4464|modulator	21	21	21	MSMEG_4464|MSMEG_4464|modulator of DNA gyrase|505 AA	1	21	21	21	19	17	18	20	19	16	19	19	18	19	19	17	18	20	19	16	19	19	18	19	19	17	18	20	19	16	19	19	18	19	55.8	55.8	55.8	54.511	505	505	0	176.41	By MS/MS	By MS/MS
MSMEG_4471|MSMEG_4471|MarR-family	MSMEG_4471|MSMEG_4471|MarR-family	3	3	3	MSMEG_4471|MSMEG_4471|MarR-family protein transcriptional regulator|149 AA	1	3	3	3	2	3	2	2	2	2	3	3	2	3	2	3	2	2	2	2	3	3	2	3	2	3	2	2	2	2	3	3	2	3	28.2	28.2	28.2	16.488	149	149	0	18.682	By matching	By MS/MS
MSMEG_4474|MSMEG_4474|acyl-CoA	MSMEG_4474|MSMEG_4474|acyl-CoA	19	19	19	MSMEG_4474|MSMEG_4474|acyl-CoA oxidase|640 AA	1	19	19	19	17	16	15	17	14	15	17	17	14	16	17	16	15	17	14	15	17	17	14	16	17	16	15	17	14	15	17	17	14	16	33.6	33.6	33.6	70.49	640	640	0	308.9	By MS/MS	By MS/MS
MSMEG_4475|MSMEG_4475|LppP	MSMEG_4475|MSMEG_4475|LppP	2	2	2	MSMEG_4475|MSMEG_4475|LppP protein|159 AA	1	2	2	2	2	2	1	2	1	1	2	2	2	2	2	2	1	2	1	1	2	2	2	2	2	2	1	2	1	1	2	2	2	2	13.8	13.8	13.8	16.859	159	159	0	8.9861	By matching	By MS/MS
MSMEG_4476|MSMEG_4476|hypothetical	MSMEG_4476|MSMEG_4476|hypothetical	7	7	7	MSMEG_4476|MSMEG_4476|hypothetical protein|106 AA	1	7	7	7	5	5	6	6	6	6	4	6	7	6	5	5	6	6	6	6	4	6	7	6	5	5	6	6	6	6	4	6	7	6	82.1	82.1	82.1	11.694	106	106	0	211.74	By MS/MS	By MS/MS
MSMEG_4479|MSMEG_4479|conserved	MSMEG_4479|MSMEG_4479|conserved	2	2	2	MSMEG_4479|MSMEG_4479|conserved hypothetical protein|89 AA	1	2	2	2	2	2	2	2	2	2	2	1	2	2	2	2	2	2	2	2	2	1	2	2	2	2	2	2	2	2	2	1	2	2	38.2	38.2	38.2	9.7009	89	89	0	5.0684	By MS/MS	By matching
MSMEG_4482|MSMEG_4482|DNA	MSMEG_4482|MSMEG_4482|DNA	1	1	1	MSMEG_4482|MSMEG_4482|DNA primase|636 AA	1	1	1	1	1	1	1	1	1	1	0	1	1	1	1	1	1	1	1	1	0	1	1	1	1	1	1	1	1	1	0	1	1	1	2	2	2	69.815	636	636	0	5.1062	By MS/MS	By MS/MS
[truncated: 779 more rows]
[truncated: 73 more columns]

## Sheet: Norfloxacin 15hr protein group
Protein IDs	Majority protein IDs	Peptide counts (all)	Peptide counts (razor+unique)	Peptide counts (unique)	Fasta headers	Number of proteins	Peptides	Razor + unique peptides	Unique peptides	Peptides 1	Peptides 10	Peptides 2	Peptides 3	Peptides 4	Peptides 5	Peptides 6	Peptides 7	Peptides 8	Peptides 9	Razor + unique peptides 1	Razor + unique peptides 10	Razor + unique peptides 2	Razor + unique peptides 3	Razor + unique peptides 4	Razor + unique peptides 5	Razor + unique peptides 6	Razor + unique peptides 7	Razor + unique peptides 8	Razor + unique peptides 9	Unique peptides 1	Unique peptides 10	Unique peptides 2	Unique peptides 3	Unique peptides 4	Unique peptides 5	Unique peptides 6	Unique peptides 7	Unique peptides 8	Unique peptides 9	Sequence coverage [%]	Unique + razor sequence coverage [%]	Unique sequence coverage [%]	Mol. weight [kDa]	Sequence length	Sequence lengths	Q-value	Score	Identification type 1	Identification type 10
[truncated: 2,239 more rows]
[truncated: 73 more columns]

[truncated: 4 more sheets: Norfloxacin 25hr protein group, Streptomycin 7.5hr protein grou, Streptomycin 15hr protein group, Streptomycin 25hr protein group]
