# Supplementary material for: ATP burst is the dominant driver of antibiotic lethality in Mycobacterium smegmatis
Source: eLife. 2026 Jan 13;13:RP99656. doi: 10.7554/eLife.99656 (PMC12799214; doi:10.7554/eLife.99656)
Supplement: Figure 2—figure supplement 1—source data 2. [file elife-99656-fig2-figsupp1-data2.xlsx]

## Sheet: Nor 7.5 hr
			Drug-free replicates					Drug-treated replicates						Proteins exclusively absent in drug-treated samples
Majority protein IDs	log2 Fold Difference(drug/drug free control)	Negative log10 p value	LFQ intensity 1	LFQ intensity 2	LFQ intensity 3	LFQ intensity 4	LFQ intensity 5	LFQ intensity 6	LFQ intensity 7	LFQ intensity 8	LFQ intensity 9	LFQ intensity 10		MSMEG_2095
MSMEG_1468	0.453221	1.92935	21.4372	20.9893	21.1108	21.4316	NaN	21.7255	21.8068	21.385	21.7986	21.7611		MSMEG_0890
MSMEG_1673	-0.0897118	0.626777	20.3788	20.6211	20.3778	20.5111	20.244	20.3827	20.2514	20.3294	20.4082	20.3126
MSMEG_2280	0.11716	0.32613	22.6214	22.6829	23.257	23.2046	23.3051	23.1402	23.1165	23.2713	23.1311	22.9976
MSMEG_5750	-0.0478401	0.291057	20.4592	20.4992	20.3577	20.3378	20.5695	20.5512	NaN	20.3047	20.3306	20.4008
MSMEG_5771	-0.752752	1.50305	27.3253	27.1389	26.0707	26.3882	26.9722	25.9401	26.3592	25.8731	25.5295	26.4296
MSMEG_6211	-0.427751	0.813598	20.2879	20.4035	19.7553	19.8865	20.4765	NaN	19.8276	19.3955	19.3356	20.3782
MSMEG_0023	-0.128212	0.297124	22.7515	22.0026	22.0433	22.119	22.4021	21.9526	21.9969	22.0049	22.5925	22.1307
MSMEG_0063	-0.427129	0.522383	20.0099	NaN	19.2537	19.6855	20.6614	19.3427	19.2173	19.1022	19.2669	20.4484
MSMEG_0091	0.0992686	0.133247	19.3633	NaN	19.6856	18.634	19.2395	19.7307	19.4948	19.3668	18.6467	19.4105
MSMEG_0166	0.150466	0.725704	22.3136	22.3057	21.9073	22.2389	21.9468	22.2372	22.4377	22.2259	22.1575	22.4064
MSMEG_0399	0.398278	1.06224	NaN	25.0035	24.7869	24.1078	24.7503	25.0766	24.8956	25.2642	24.8045	25.2612
MSMEG_0599	-0.154725	0.357493	19.6255	18.9611	18.8041	18.7504	19.0779	18.966	NaN	18.6853	18.8893	19.0158
MSMEG_0814	0.117599	0.159129	19.5659	20.5251	20.6058	20.1866	20.2652	20.0164	19.6368	20.6393	20.7268	20.7174
MSMEG_0887	-0.0367411	0.136365	20.4875	20.1116	20.4891	20.4132	20.6384	20.4375	20.3001	NaN	20.4187	20.4085
MSMEG_1063	0.213364	0.72543	20.3878	20.5001	20.3339	20.8777	20.7196	21.0701	20.6902	20.7512	20.9311	20.4433
MSMEG_1076	-0.0767937	0.102944	26.2135	26.3228	26.1904	26.6819	27.3504	26.0625	26.3133	26.268	26.7188	27.0123
MSMEG_1124	-0.320501	0.984054	21.5112	21.4614	21.1644	21.2467	21.6149	21.3114	21.0827	20.6126	20.9031	21.4864
MSMEG_1188	-0.145649	0.927326	20.9581	21.0622	20.7684	20.8838	21.0534	20.7885	20.7481	20.6377	20.8025	21.0208
MSMEG_1245	-0.411354	0.919567	21.2192	20.9407	20.1701	20.5797	20.793	20.8438	19.9976	20.0156	20.3075	20.4813
MSMEG_1339	-0.0728523	0.127695	24.8147	24.9419	24.7343	24.6897	25.0234	25.0595	25.0635	24.1759	24.3599	25.1809
MSMEG_1550	-0.555542	1.11457	22.1381	22.5338	21.6585	22.0112	22.6894	21.1933	21.8559	21.4278	21.4409	22.3354
MSMEG_1577	-0.121649	0.857889	21.1582	21.1281	21.2378	21.1265	21.0424	20.9928	20.9465	21.1798	21.1492	20.8165
MSMEG_1629	-0.326224	0.471253	20.025	19.5016	18.9004	NaN	19.2574	19.1265	18.966	18.6504	NaN	19.6367
MSMEG_1639	-0.112668	0.225882	20.6968	20.9811	20.509	20.4016	20.4516	20.3242	20.5549	20.2739	20.1799	21.1439
MSMEG_1672	0.703773	0.697364	NaN	19.4421	19.4164	20.2965	20.2493	20.6887	20.1259	19.5358	21.935	20.489
MSMEG_1758	0.262627	0.219184	21.7834	22.74	22.042	22.3251	22.2489	21.4082	23.5417	22.2198	21.686	23.5968
MSMEG_1803	-0.0986786	0.193862	21.8081	21.3378	21.9337	21.8214	21.7278	21.5684	21.2778	21.9091	22.1381	21.2419
MSMEG_1868	-0.0913921	0.27977	21.9504	22.0598	22.2345	21.827	22.3045	22.2277	21.5893	22.0324	22.0456	22.0244
MSMEG_1917	0.233617	0.851611	22.8155	22.4918	22.4909	22.5015	22.7829	22.5899	23.0009	23.0386	22.5212	23.1
MSMEG_1919	-0.077775	0.0936311	21.3427	22.0315	21.3082	20.6022	20.6648	21.3327	21.0622	20.9407	NaN	21.1128
MSMEG_2176	-0.313842	0.559171	20.0645	19.9228	18.9469	19.4334	19.4731	19.403	19.7952	18.9415	18.7727	19.3591
MSMEG_2431	0.0853427	0.175299	18.3379	18.6787	19.2421	18.9994	19.0491	19.1138	18.7725	18.9393	18.9616	NaN
MSMEG_2754	0.245718	0.490061	23.1843	23.5048	22.6106	22.806	23.4425	23.3357	23.657	22.9908	23.0434	23.75
MSMEG_2963	-0.211988	0.737973	19.7585	20.2397	19.5404	19.5968	19.5858	19.6671	19.581	19.4899	19.6292	19.2941
MSMEG_3026	-0.493223	1.13261	21.7815	21.8135	20.9582	21.107	21.7042	21.0476	21.0381	20.8325	20.5124	21.4676
MSMEG_3027	-0.015733	0.0446037	20.2274	20.2006	19.9508	19.6999	19.7174	19.8652	19.9129	19.9673	20.1304	19.8415
MSMEG_3051	-0.441861	2.06772	20.6445	20.2075	19.9714	20.4943	20.4347	20.0193	19.937	19.9349	19.9266	19.7254
MSMEG_3121	-0.362687	1.24806	20.6389	20.2973	19.8617	19.8816	20.226	19.8598	19.8834	19.5741	19.7494	20.0254
MSMEG_3284	-0.171693	1.33201	19.5168	19.5716	19.4823	19.4725	19.3767	NaN	19.5071	19.2844	19.1755	19.2822
MSMEG_3381	0.471821	1.27293	21.3346	21.3484	21.7329	20.9734	NaN	21.9664	NaN	21.9868	21.4668	21.8566
MSMEG_3418	0.0119186	0.0177161	19.9569	20.2659	20.5535	20.7534	20.8891	20.1744	20.1744	20.5713	21.0268	20.5316
MSMEG_3435	-0.328232	1.50615	21.0061	21.0806	20.6132	20.6873	20.7588	20.5164	20.6127	20.2113	20.44	20.7244
MSMEG_3482	-0.0691955	0.0615389	NaN	21.7132	20.804	21.2982	21.5935	20.8444	21.7128	20.7153	20.815	22.3275
MSMEG_3514	0.490693	2.15676	21.6143	21.5804	21.875	21.9872	21.8985	22.2276	22.3864	21.9249	22.2761	22.5938
MSMEG_3569	-0.157495	0.514962	21.9952	21.3178	21.6664	21.5163	21.5637	21.6012	21.4401	21.5495	21.5745	21.1067
MSMEG_3674	-0.451557	1.00556	27.5934	27.5384	26.8202	26.8881	27.5574	26.5986	27.2267	26.538	26.5284	27.248
MSMEG_3767	-0.475087	1.47686	21.0124	20.5454	20.174	20.3312	20.6843	20.1578	19.8735	19.887	20.4874	19.9662
MSMEG_3804	-0.510728	1.81291	24.6319	24.4425	24.2264	24.2002	24.6149	23.8366	24.1292	23.94	23.4299	24.2266
MSMEG_3819	-0.390702	1.34106	22.1922	22.3378	21.6982	21.7464	22.2198	21.5753	21.7351	21.7877	NaN	21.4947
MSMEG_3822	-0.372621	1.10512	20.3247	20.9112	19.8806	20.0527	20.0935	19.8965	19.7896	19.8655	19.8057	20.0422
MSMEG_3904	-0.402332	2.29843	20.4003	20.4965	NaN	20.1837	20.597	20.0991	20.0174	19.9533	19.9984	NaN
MSMEG_4172	-0.118416	0.247958	19.1635	19.1354	18.6889	19.3446	19.2565	19.0792	18.6004	18.9094	NaN	19.4086
MSMEG_4181	-0.185386	0.716847	23.1924	23.0375	23.1757	23.1794	23.5147	22.9549	23.2345	23.2419	22.6825	23.0589
MSMEG_4286	0.179506	0.316486	NaN	18.8405	18.7527	18.6338	18.6517	19.6003	NaN	18.5985	18.6817	18.7163
MSMEG_4479	0.135527	0.199883	20.234	20.5646	20.3715	20.2805	19.2305	20.0943	NaN	20.2929	20.3646	20.3351
MSMEG_4496	-0.203864	0.64016	19.8701	NaN	20.2028	20.3651	20.5447	20.1935	20.0144	20.0128	19.7746	20.2137
MSMEG_4804	0.124362	0.171223	NaN	23.178	21.7723	22.6579	22.8563	22.5879	22.984	22.6228	22.5712	22.9365
MSMEG_5101	-0.700493	1.45027	22.3633	22.0236	21.3094	NaN	21.8326	21.4139	21.3445	21.0252	20.6074	21.5178
MSMEG_5231	-0.110369	0.182101	19.9893	20.5108	20.1578	19.807	19.6751	19.8105	19.6257	20.0684	19.5059	20.5776
MSMEG_5484	-0.158409	0.439868	23.22	22.9409	23.0191	22.5955	22.9199	22.6267	22.8721	22.8176	22.4047	23.1824
MSMEG_5681	-0.510719	1.95595	20.4701	20.3663	20.0591	19.8315	20.304	19.9931	19.3699	19.7572	19.5866	19.7705
MSMEG_5685	-0.194649	0.373123	21.0507	21.5277	20.9016	20.515	21.1748	20.6712	21.0223	20.3977	20.7639	21.3415
MSMEG_5728	-0.210851	0.729014	21.233	NaN	21.596	21.4834	21.6701	21.4087	21.2601	21.4692	NaN	21.0011
MSMEG_5832	-0.261743	1.03578	25.8813	26.1297	25.5188	25.9473	26.155	25.7529	25.6639	NaN	25.6769	25.5651
MSMEG_5875	0.23873	0.575498	22.0454	22.503	22.2461	22.2636	22.3799	NaN	22.8517	22.3291	22.0516	22.8729
MSMEG_5988	0.227268	0.576759	NaN	20.8389	20.4144	20.4077	20.4922	20.7103	21.2382	20.3917	20.5775	20.9102
MSMEG_6081	-0.365332	2.87898	21.0342	20.9395	20.6785	20.6709	20.8291	20.5316	20.378	20.4586	20.4619	20.4953
MSMEG_6182	-0.11075	0.377084	21.7445	21.4382	21.3066	21.4108	21.6806	21.3006	21.2924	21.3247	21.7039	NaN
MSMEG_6288	-0.352165	1.07597	20.2151	20.1197	19.5842	19.7192	20.2557	NaN	19.7737	19.5129	19.4292	19.7907
MSMEG_6409	-0.331868	1.29069	20.8711	20.5437	20.193	20.1074	20.4277	19.9296	20.0455	20.2261	20.121	20.1613
MSMEG_6756	-0.156175	0.495562	NaN	18.8482	19.3141	18.9689	18.759	18.9175	18.8531	18.9795	18.852	18.4798
MSMEG_0007	-0.366756	0.871924	21.5098	20.9412	20.5554	20.4947	21.2127	20.5305	20.6594	20.1911	20.6912	20.8078
MSMEG_0064	-0.168393	0.256359	20.1581	20.384	19.698	19.8214	20.7026	19.6969	19.9742	19.7318	19.7508	20.7683
MSMEG_0065	-0.430426	0.250647	25.3793	27.8424	26.9429	27.3163	27.9017	24.7074	26.9767	26.915	26.5946	28.0367
MSMEG_0066	-0.202289	0.22258	27.0631	26.9848	25.9428	26.3401	27.2349	26.1503	26.5494	26.108	26.1758	27.5707
MSMEG_0080	-0.0213264	0.07643	20.6209	20.5612	20.2463	20.3803	20.5628	20.7242	20.3806	20.2849	20.4501	20.4251
MSMEG_0356	-0.0171432	0.0256684	24.5246	24.1233	24.3549	23.5826	24.6136	24.3673	23.7577	24.3701	24.0726	24.5455
MSMEG_0409	-0.33566	1.00113	20.3299	20.1732	20.607	20.1921	19.9836	19.9755	20.1998	20.2613	19.6718	19.4991
MSMEG_0415	-0.233384	0.680978	22.9695	22.5827	22.3081	22.3121	22.5307	22.6687	21.9767	22.1613	22.4697	22.2598
MSMEG_0559	-0.242934	0.285422	28.7197	29.3526	27.8983	28.0996	29.0801	28.359	28.6563	27.8681	27.954	29.0982
MSMEG_0678	-0.186335	1.41248	21.8058	21.988	21.9511	21.9963	21.9214	21.7625	21.7818	21.6166	21.9704	21.5996
MSMEG_0679	0.0101269	0.020887	19.9891	19.982	19.3598	19.8285	19.6751	20.1033	19.7428	19.416	19.6671	19.9559
MSMEG_0685	0.0731739	0.140525	19.9244	20.0967	20.6619	20.601	20.7196	20.2206	20.2189	20.7467	20.4556	20.7278
MSMEG_0686	-0.0106941	0.020418	22.0312	22.111	22.2991	22.2404	22.7876	22.1248	21.9096	22.583	22.3066	22.4919
MSMEG_0752	-0.174022	0.856795	22.0644	21.9729	21.9441	22.2097	21.9539	22.1068	21.8654	21.755	21.9835	21.5643
MSMEG_0833	-0.181968	0.655326	21.6585	21.5206	20.9822	21.3543	21.5072	21.307	21.3556	21.1038	20.996	21.3505
MSMEG_0834	-0.361472	1.43871	23.8233	23.8195	23.2819	23.5031	23.9152	23.2181	23.3494	23.2014	23.162	23.6049
MSMEG_0835	-0.132483	0.711211	24.8505	24.7139	24.4326	24.6341	24.6961	24.3499	24.4623	24.5677	24.7388	24.546
MSMEG_0839	-0.326885	0.67527	21.9113	20.761	20.6724	20.6963	20.8209	20.7146	20.6346	20.7489	20.4837	20.6457
MSMEG_0863	-0.468064	2.70321	22.2226	22.0947	21.8921	21.6619	21.8933	21.3988	21.6333	21.4736	21.4597	21.4588
MSMEG_0944	-0.088253	0.160513	21.0991	21.7794	21.6518	21.1588	21.6534	21.3272	21.7696	21.1295	20.9508	21.7241
MSMEG_0991	0.0983681	0.381494	19.5816	19.4766	19.8167	19.881	19.6683	20.0156	19.6694	19.7599	19.9357	19.5353
MSMEG_1077	0.0486946	0.525174	20.7934	20.8572	20.7819	20.9289	20.8878	20.7969	20.8541	20.9408	20.9912	20.9097
MSMEG_1078	0.0126076	0.0138371	20.594	20.5564	21.3853	20.669	19.7046	NaN	20.5973	20.7198	20.676	20.3848
MSMEG_1294	-0.0904591	1.11124	19.1127	19.1201	19.2675	19.2029	19.1471	18.9954	19.2027	19.0792	19.0566	19.0639
MSMEG_1342	-0.311888	1.23258	22.5141	22.199	22.3177	22.0378	NaN	NaN	21.7928	21.9791	22.194	21.855
MSMEG_1349	-0.128592	0.226984	20.876	21.7333	21.9732	21.8736	NaN	21.5102	21.5528	21.5734	21.2616	21.5293
MSMEG_1393	-0.241697	0.885989	22.658	22.8121	22.4259	22.7471	22.7631	22.3725	22.7458	22.0788	22.2994	22.7011
MSMEG_1422	-0.217601	0.217461	22.6528	22.9854	21.9314	21.9457	22.766	22.0006	22.9834	21.3831	21.73	23.0961
MSMEG_1440	0.17639	0.249038	25.6045	26.2377	25.4565	25.9582	25.907	25.797	26.5769	25.4961	25.4993	26.6765
MSMEG_1443	0.262753	0.414146	23.8633	23.7803	23.3903	23.9474	23.8275	24.5465	24.0044	23.0437	24.4886	24.0394
MSMEG_1519	-0.431585	1.92035	25.4956	25.2512	24.9522	25.0948	25.2025	24.9658	24.9082	24.4018	24.76	24.8025
MSMEG_1522	0.404784	0.546939	26.1648	26.2902	25.1867	25.4299	25.9444	26.1575	25.7956	25.8621	25.9207	27.3039
MSMEG_1578	-0.408635	1.58332	23.5938	23.8792	23.3045	23.0653	23.4004	23.0154	23.0406	23.0823	22.8423	23.2194
MSMEG_1656	0.200197	1.58002	19.3395	19.4513	19.1023	19.2781	19.189	19.5415	NaN	19.4353	19.4503	19.4618
MSMEG_1736	-0.426143	1.20296	20.1743	19.7183	19.232	19.361	19.8918	19.6194	19.139	19.1256	19.1074	19.2555
MSMEG_1770	0.0267933	0.037861	27.086	27.4092	26.7442	27.4397	27.3824	27.2983	27.355	26.5933	27.0696	27.8791
MSMEG_1794	0.610173	0.738503	19.78	21.1801	21.6496	20.6376	21.3847	20.6971	21.2169	22.0986	21.8476	21.8227
MSMEG_1827	0.0486808	0.127488	NaN	20.368	20.3219	20.5818	20.6381	20.6788	NaN	20.1817	20.703	20.541
MSMEG_1873	-0.20579	1.78187	22.2214	22.0786	22.0938	22.0735	22.1011	21.9451	21.7247	22.0537	21.8042	22.0119
MSMEG_1887	-0.360484	0.720331	23.4549	23.6014	22.7734	22.8843	23.2195	22.7886	23.097	22.5197	22.3192	23.4065
MSMEG_1922	0.113964	0.288026	22.3429	22.716	23.0817	22.8615	22.8742	22.4924	22.9976	23.0809	23.0928	22.7823
MSMEG_1932	-0.338982	1.59981	21.0629	20.7096	20.753	20.7993	20.6078	20.5148	20.1528	20.6566	20.6203	20.2932
MSMEG_1947	-0.36401	0.998888	27.3659	27.7978	27.0317	26.8893	27.0675	26.7925	27.2024	26.8129	26.5362	26.9882
MSMEG_2010	0.586727	1.32533	22.8883	24.2456	23.7827	23.4847	23.145	24.0023	23.9974	24.0089	24.0706	24.4007
MSMEG_2068	-0.227013	0.652514	20.933	21.0424	20.6554	20.8073	20.8637	20.1582	20.7246	20.6311	20.5122	21.1406
MSMEG_2132	0.148518	0.746054	20.9215	21.2062	21.1275	20.9762	NaN	21.1602	21.0304	21.3663	21.2684	NaN
MSMEG_2197	-0.13115	1.24601	19.8113	19.6389	19.5751	19.5287	19.5627	19.4437	19.4785	19.4445	19.4835	19.6108
MSMEG_2201	0.19824	0.14236	21.9424	23.556	24.5558	24.077	23.7646	22.6129	23.957	24.0018	23.9612	24.3541
MSMEG_2274	-0.271566	0.562691	22.6549	22.7083	22.6652	22.6713	22.2931	22.6059	21.6394	22.791	22.6013	21.9974
MSMEG_2434	-0.140265	0.267159	21.1051	21.4275	21.9912	21.78	21.3352	21.2449	21.527	21.8455	21.3901	20.9301
MSMEG_2446	0.29429	0.658608	20.6586	20.5952	19.7696	20.3556	20.7454	21.1108	20.916	20.3512	20.5669	20.651
MSMEG_2623	-0.112753	0.224596	20.9125	21.1461	20.2755	20.9776	20.627	20.7638	20.9114	20.2551	20.4749	20.9698
MSMEG_2688	-0.214847	0.455072	24.7543	24.4881	23.5882	24.5142	24.3199	24.3289	24.2687	23.8368	24.0541	24.1021
MSMEG_2768	-0.324216	1.20072	21.6431	21.6948	21.1774	21.4352	21.3381	21.2547	21.3633	21.0639	20.8522	NaN
MSMEG_2788	-0.303593	0.849747	19.4548	18.8895	18.6749	18.7002	19.37	18.5572	18.6739	18.5308	18.8353	18.9744
MSMEG_2953	-0.160952	0.683426	22.423	22.8342	22.9045	22.5984	22.7571	22.7305	22.5548	22.6945	22.3192	22.4133
MSMEG_2960	0.510334	2.00197	21.1164	20.9098	20.8904	20.6382	20.8024	NaN	21.6784	21.0466	21.3372	21.4649
MSMEG_2988	-0.326568	0.911082	20.2396	NaN	20.8357	20.3187	20.3462	20.1823	19.7659	20.3376	20.1482	NaN
MSMEG_3035	0.0211224	0.0469549	24.0619	24.4798	24.927	24.7236	24.5507	24.4083	24.6064	24.7445	24.6678	24.4216
MSMEG_3048	-0.110081	0.454871	21.2147	21.1306	21.0858	20.688	21.2684	21.0293	20.9572	20.8176	20.9623	21.0707
MSMEG_3212	-0.0752759	0.256202	22.1502	22.4206	22.0019	22.3664	NaN	22.1667	22.2338	21.9584	22.2791	NaN
MSMEG_3216	-0.347622	1.31653	NaN	19.8417	19.4808	19.3436	19.8854	19.2116	19.3238	NaN	19.2271	19.3983
MSMEG_3238	0.135883	0.34208	22.2336	22.1167	22.5911	21.867	22.2724	22.4783	22.2747	22.7479	22.2804	21.9789
MSMEG_3244	-0.52069	1.57183	22.1803	22.3079	21.539	21.6729	21.9026	21.5128	21.7176	21.0411	21.1763	21.5515
MSMEG_3304	-0.0727892	0.228305	21.1785	21.1012	20.9866	21.0534	21.4269	NaN	20.9725	21.2368	20.8179	21.2788
MSMEG_3357	-0.242769	0.380264	20.6312	20.2657	19.6007	NaN	20.2958	20.256	19.7376	19.6101	19.6511	20.5231
MSMEG_3440	-0.0522888	0.185958	20.2476	20.065	20.509	20.222	20.3796	20.2206	20.2669	20.5096	20.1619	20.0028
MSMEG_3477	-0.453136	1.37789	24.0357	24.0589	23.6839	23.671	23.2894	23.563	23.2801	23.5676	23.1217	22.9409
MSMEG_3494	-0.346398	2.042	24.4904	24.2405	24.484	24.5648	24.639	24.3292	23.9744	24.1567	24.2718	23.9546
MSMEG_3628	-0.0793015	0.161605	21.7986	22.3904	22.6671	22.3228	21.9408	22.2819	22.3776	21.7813	22.2663	22.016
MSMEG_3648	0.0795868	0.135038	25.054	26.2187	26.1945	25.6807	25.8014	25.7859	25.8201	26.1403	25.7014	25.8994
MSMEG_3686	-0.300769	0.68641	20.8143	20.9555	20.1549	20.4522	20.8139	20.1951	20.0066	20.326	20.2076	20.9515
MSMEG_3764	0.203768	0.449516	NaN	23.8642	23.6977	23.1332	23.4383	23.2826	23.8299	24.1021	23.685	23.7861
MSMEG_3766	-0.442975	0.81811	23.0027	23.5133	23.0947	22.7648	23.3945	22.6402	23.1981	22.1688	22.2011	23.3471
MSMEG_3782	0.415324	1.29474	NaN	20.825	21.4234	21.4332	21.487	21.9719	21.5743	21.41	21.8083	21.7729
MSMEG_3859	-0.373878	0.641635	22.0046	21.4774	20.7093	20.666	20.8706	20.6023	20.8191	20.6287	21.2293	20.579
MSMEG_3861	0.146659	0.754765	19.9802	20.0568	20.1003	19.9508	19.8021	20.3037	20.1721	20.2756	20.0198	19.8523
MSMEG_3872	-0.278746	0.672753	19.7148	20.3876	20.6812	20.3046	20.3442	19.626	20.0243	20.4326	20.082	19.8739
MSMEG_3918	-0.445127	0.996847	NaN	19.8103	19.4042	19.539	19.4555	19.1407	NaN	19.2853	18.5114	19.491
MSMEG_4043	-0.193559	0.845647	20.5234	20.3444	20.6347	20.6119	20.4205	20.4913	20.1659	20.5485	20.3784	19.983
MSMEG_4084	-0.137777	0.291534	19.8076	NaN	20.205	19.3869	19.5733	19.8233	19.6292	19.5752	19.394	NaN
MSMEG_4125	-0.217096	0.461621	21.4099	21.5502	22.0169	21.7726	21.3366	21.6308	21.7282	21.6634	21.1621	20.8162
MSMEG_4126	0.208006	0.626621	20.6236	20.647	21.2709	20.7093	20.5482	21.2299	20.8825	21.0759	20.9982	20.6526
MSMEG_4183	-0.271082	1.41213	21.0086	21.2622	20.8397	20.6235	20.8505	20.5683	20.6032	20.6968	20.6356	20.725
MSMEG_4188	-0.403371	1.48403	20.0053	20.0609	20.2618	19.744	20.0092	19.7041	19.7378	19.896	19.6132	19.1132
MSMEG_4192	-0.259554	1.95237	21.1059	20.9182	20.9713	20.8855	20.7814	20.8623	20.5422	20.729	20.6682	20.5627
MSMEG_4221	-0.17848	1.88295	20.8939	21.0898	20.8573	20.9722	20.9236	20.7545	20.6563	20.8573	20.8564	20.72
MSMEG_4229	-0.343864	1.53523	19.3698	19.5317	19.0243	NaN	19.4537	19.048	18.8681	19.0225	19.0654	NaN
MSMEG_4236	0.38785	1.99821	19.7006	19.4989	19.709	19.559	NaN	20.2463	20.0251	19.8203	19.9271	NaN
MSMEG_4261	0.133187	0.187623	21.3978	21.385	21.2887	21.3689	21.7101	21.0885	NaN	21.0188	21.8779	22.2679
MSMEG_4265	-0.257854	0.643018	21.1467	21.1555	20.4398	20.3212	20.6423	20.3936	20.507	20.5047	20.2268	20.784
MSMEG_4287	-0.484188	1.37016	21.4473	21.9665	21.2427	NaN	21.809	21.0992	21.1132	20.9589	20.9195	21.57
MSMEG_4351	-0.159442	0.23735	22.7445	22.7645	22.2232	21.4503	21.7205	22.1543	22.1263	22.1467	21.7959	21.8826
MSMEG_4399	1.15759	4.03511	22.771	22.7547	22.609	22.5846	22.6023	23.5199	23.9845	23.6048	23.6427	24.3576
MSMEG_4487	-0.316671	1.14718	NaN	22.1407	21.5443	21.8992	22.0922	21.7639	21.5262	21.4824	21.4213	21.8183
MSMEG_4489	0.0694443	0.107237	19.0141	18.7557	17.9334	18.4475	18.5936	18.3435	NaN	18.3951	18.8489	18.8856
MSMEG_4571	0.466229	0.985943	25.8496	25.4423	24.6659	25.1665	25.6273	25.8305	26.1781	25.2894	26.0133	25.7715
MSMEG_4579	-0.256401	1.22208	21.4835	21.7269	21.9697	21.6351	21.6731	21.4148	21.6526	21.5182	21.4884	21.1322
MSMEG_4580	-0.164725	1.24601	23.2313	23.0337	23.22	23.2033	23.1945	23.0388	23.09	23.0218	23.1411	22.7676
MSMEG_4595	-0.378988	1.18963	20.7377	20.889	20.2995	20.4349	21.0597	20.0974	20.1883	20.2573	20.2657	20.7172
MSMEG_4742	0.469924	1.07317	21.4978	21.2718	20.8446	21.6681	21.4907	21.6927	21.7365	21.3576	22.5258	21.81
MSMEG_4909	0.014275	0.0310836	22.0816	21.8333	22.0169	21.9941	21.4398	21.636	22.0635	21.7175	21.8	22.22
MSMEG_4975	-0.254373	0.503255	19.3974	NaN	19.6844	20.2226	19.6031	19.6692	NaN	19.3544	19.7616	19.1048
MSMEG_5015	-0.165696	1.06444	21.9242	22.0885	21.685	21.7104	21.9601	21.8122	21.7748	21.6476	21.655	21.65
MSMEG_5154	0.295666	0.460021	25.6285	25.1392	24.6967	25.1132	24.9634	25.765	25.4535	24.7052	24.9888	26.1068
MSMEG_5170	0.223529	1.01607	21.9146	22.1914	22.0282	22.2222	21.7112	22.1878	22.2699	22.2108	22.482	22.0349
MSMEG_5172	-0.214143	1.01331	22.093	22.3223	22.076	22.066	21.9874	22.1044	21.8981	21.5737	21.8019	22.096
MSMEG_5191	-0.0559578	0.106386	NaN	24.6884	23.9432	24.2942	23.9691	24.4971	24.242	24.1119	24.1541	23.8339
MSMEG_5210	-0.159435	1.08539	20.3442	20.1216	20.119	20.2225	NaN	NaN	20.1381	20.1052	19.8907	20.0355
MSMEG_5489	-0.163955	0.424709	25.6183	25.6627	25.2116	25.4025	25.7397	25.8453	25.3621	25.2954	24.9299	25.3824
MSMEG_5557	0.146978	0.181456	20.6995	20.5426	20.2675	20.2741	21.3529	20.8841	20.42	20.273	20.6036	21.6909
MSMEG_5571	-0.249906	0.543546	20.469	20.5114	20.133	20.3974	20.7991	20.2804	19.8835	19.9353	20.0367	20.9244
MSMEG_5612	-0.0966576	0.300777	22.7219	22.4997	23.0585	22.8483	22.8953	22.8913	22.5987	22.8889	22.7928	22.3687
MSMEG_5617	-0.221474	0.370304	24.1416	23.224	23.2946	23.2933	23.8791	23.7852	23.0308	23.3835	22.8187	23.7071
MSMEG_5645	-0.269289	0.907845	20.4288	20.785	20.617	20.3071	21.0047	20.1503	20.4207	20.3136	20.2187	20.6929
MSMEG_5664	-0.0161926	0.0435044	24.848	24.793	25.0354	25.1194	24.8288	25.1902	24.9451	24.9451	24.9726	24.4907
MSMEG_5701	-0.0295849	0.13868	20.4177	20.6535	20.4678	20.512	20.5008	20.5362	20.4314	20.2251	20.6202	20.591
MSMEG_5704	-0.0674374	0.0457586	24.791	26.4392	25.6132	26.0835	25.832	24.1143	25.8702	25.9432	25.6661	26.828
MSMEG_5707	-0.128012	0.641516	23.4658	23.6063	23.1049	23.2613	23.458	23.2651	23.1735	23.1575	23.4031	23.2568
MSMEG_5770	-0.550656	1.16415	27.8065	27.8204	27.0947	27.3511	27.9172	26.9176	27.145	26.8028	26.5787	27.7925
MSMEG_5784	-0.411445	1.29598	21.3649	21.3773	20.7326	20.7312	20.8835	20.2499	20.7566	20.7716	20.501	20.7531
MSMEG_5797	-0.419514	0.9325	23.9203	24.3791	23.8239	23.689	23.9128	23.6003	23.957	23.3156	22.8346	23.9199
MSMEG_5827	1.24216	3.95481	NaN	21.7821	22.0394	22.295	21.7997	NaN	23.3621	23.2512	23.2433	23.0282
MSMEG_5904	-0.312258	0.69683	24.2829	25.2432	24.5159	24.9166	24.6881	24.1273	24.846	24.3836	24.0609	24.6676
MSMEG_5920	0.0600681	0.131456	20.482	20.4863	21.0956	20.9977	21.1383	20.7085	20.8338	21.184	21.0467	20.7272
MSMEG_5927	-0.128078	0.398576	21.9081	22.2241	21.8422	22.0058	NaN	21.9855	22.0889	21.8282	NaN	21.5653
MSMEG_6002	-0.123134	0.548157	20.2547	20.1758	20.6309	20.5232	20.3897	20.2361	20.3263	20.4887	20.2246	20.083
MSMEG_6099	-0.173692	0.46746	20.2532	20.0154	19.728	NaN	19.8269	19.8075	19.6813	19.4427	19.7937	20.1856
MSMEG_6101	-0.390716	2.19432	21.6255	21.8652	21.3549	21.5343	21.756	21.4109	21.2461	21.146	21.0699	21.3094
MSMEG_6145	-0.309416	0.6539	20.5004	20.3419	19.983	20.2235	20.1778	20.1006	NaN	20.0018	19.2629	20.3784
MSMEG_6159	0.196173	0.280418	28.7428	29.6939	29.4342	29.2538	28.8488	28.5492	29.5998	29.614	29.2663	29.9251
MSMEG_6192	0.726449	1.92252	25.1545	24.7058	24.36	24.8745	24.7673	25.1724	25.4808	25.1612	25.5056	26.1742
MSMEG_6248	0.552678	1.70295	18.7161	18.8436	19.4561	18.9139	19.0613	19.2348	19.4007	19.9321	19.8479	19.339
MSMEG_6251	-0.0879669	0.292477	22.0753	21.9015	21.8582	21.6679	21.7509	22.1725	21.5612	21.7313	21.7188	21.6302
MSMEG_6265	-0.481374	1.90228	20.78	20.744	20.261	20.3546	20.4205	20.2701	19.9528	20.2947	19.7645	19.8711
MSMEG_6277	-0.449527	1.19968	21.727	21.1692	20.9325	20.6871	20.9326	NaN	20.5423	20.6083	20.7421	20.6679
MSMEG_6303	-0.251241	0.60558	20.4265	20.419	21.2676	20.6283	20.8282	20.8407	20.4704	20.5748	20.3498	20.0777
MSMEG_6399	-0.141375	0.5114	21.4826	21.1956	21.6974	21.6131	21.664	21.5206	21.4407	21.421	21.5331	21.0304
MSMEG_6477	0.40698	0.770024	NaN	22.121	22.6289	22.2362	21.51	22.0541	22.9861	22.6566	22.4818	22.4764
MSMEG_6482	-0.141626	1.48487	NaN	20.7029	20.58	20.6934	20.6741	20.5781	20.4453	20.6105	20.4502	NaN
MSMEG_6483	-0.371394	0.97868	21.2122	21.116	20.3746	20.4715	20.8708	20.7752	20.1621	20.2013	20.5557	20.4938
MSMEG_6665	-0.0900188	0.112029	21.0982	20.9555	20.7977	21.2554	22.0287	20.6307	20.6914	21.2121	21.4165	21.7347
MSMEG_6791	-0.0720758	0.11328	NaN	19.2857	19.6998	19.6448	20.1338	19.5416	19.2331	19.7024	NaN	19.9987
MSMEG_6895	-0.380054	0.87612	26.2978	26.0693	25.2656	25.332	26.0189	25.422	25.4827	25.1919	25.2772	25.7096
MSMEG_6906	-0.110841	0.868564	20.1473	20.3455	20.2425	20.0443	20.3117	20.1358	19.978	20.1965	20.1503	20.0765
MSMEG_0042	-0.228755	0.89412	NaN	20.5016	20.4221	20.6672	20.9786	20.5694	20.2271	20.4626	20.5249	20.2842
MSMEG_0052	-0.580974	2.41018	20.9362	20.7115	20.542	20.8314	21.2444	NaN	20.3525	20.1836	20.2464	20.306
MSMEG_0069	-0.275833	1.0379	24.1575	24.0923	23.697	23.4968	23.9181	23.708	23.5284	23.6116	23.353	23.7816
MSMEG_0081	0.17625	0.430931	24.0969	24.0767	23.4832	23.7241	23.3479	24.1104	23.821	23.7309	23.7067	24.241
MSMEG_0084	-0.0707336	0.0786639	28.0632	28.3345	27.7905	27.6076	27.6283	28.4809	28.3129	27.1365	27.0772	28.063
MSMEG_0093	-0.14825	0.938726	21.2496	21.531	21.3341	21.3173	21.3361	21.1181	21.0252	21.4408	21.2364	21.2063
MSMEG_0215	0.138038	0.604658	21.9426	21.8936	21.7805	21.9963	21.8849	22.3225	21.9934	21.9825	22.1868	21.7029
MSMEG_0221	-0.344321	1.38188	20.1716	20.4071	19.9898	20.2017	20.0197	19.7103	19.4049	19.9406	20.1146	19.8978
MSMEG_0242	-0.65365	1.15644	24.4583	23.9329	23.296	23.6096	24.4821	23.4144	23.1766	22.9513	22.9146	24.0537
MSMEG_0251	-0.0135529	0.0380627	22.3517	22.8832	22.6316	22.4392	22.5226	22.3953	22.6706	22.7625	22.6148	22.3174
MSMEG_0282	-0.0304924	0.0459332	23.8412	23.5964	22.8699	23.2991	23.6662	24.018	23.2244	23.1043	23.2891	23.4846
MSMEG_0284	0.0182728	0.0532603	21.7395	21.6065	21.9414	21.5681	22.1402	21.801	21.8772	21.7397	22.0024	21.6669
MSMEG_0383	-0.0879307	0.210624	22.1551	22.3791	21.8103	21.7381	22.2681	22.0646	21.896	21.9605	21.6541	22.336
MSMEG_0394	-0.273641	1.76138	23.0075	22.768	22.6993	23.017	22.9831	22.7054	22.5198	22.4778	22.8175	22.5861
MSMEG_0435	-0.0909912	0.249352	20.7976	21.109	20.9421	20.9596	21.5178	20.9193	20.6849	21.1962	20.9753	21.0953
MSMEG_0447	-0.187762	0.602062	23.4664	23.5255	23.2593	22.8486	22.8869	23.0644	23.0411	23.0243	22.8056	23.1125
MSMEG_0638	-0.288445	0.812955	20.9604	21.1711	20.7549	20.4364	20.5999	NaN	20.2689	20.6482	20.3192	20.7482
MSMEG_0639	-0.298614	0.891395	22.5616	22.2633	21.8698	21.9346	22.3584	21.9056	21.7899	21.5486	21.9769	22.2736
MSMEG_0682	-0.133034	0.735313	20.1947	20.0111	20.4286	20.2549	20.4465	20.1869	20.0931	20.2548	20.1401	19.9958
MSMEG_0683	-0.0746643	0.242436	24.5745	24.832	24.2248	24.4335	24.3615	24.6688	24.3538	24.3687	24.2232	24.4385
MSMEG_0741	-0.431176	1.81627	23.6718	23.5393	23.0609	23.0321	23.4201	22.923	22.8638	22.9241	22.7532	23.1043
MSMEG_0753	-0.00362816	0.00598329	21.7245	21.8567	21.2329	21.4353	21.4296	21.176	21.7959	21.2201	21.4075	22.0613
MSMEG_0824	-0.120594	0.142025	21.3157	21.1948	20.731	21.3541	21.8179	21.2965	21.2779	20.1685	21.1977	21.87
MSMEG_0832	-0.405766	1.9832	24.2024	24.4343	23.9038	23.8983	24.199	23.7592	23.6629	23.6758	23.5551	23.956
MSMEG_0882	-0.259273	1.58841	21.8472	21.9113	21.4775	21.6678	21.7156	21.4093	21.5991	21.3648	21.3433	21.6066
MSMEG_0884	0.210272	0.830282	22.0905	22.3322	22.1267	22.4533	22.1959	22.7972	22.1871	22.3545	22.6208	22.2904
MSMEG_0909	-0.222449	0.59443	22.627	22.1851	21.7001	21.938	22.0609	21.9909	21.8752	21.7604	21.8926	NaN
MSMEG_0922	-0.162849	0.710616	22.0718	22.2242	21.9698	22.1438	22.2004	22.2716	22.031	21.7968	22.0329	21.6634
MSMEG_0928	-0.308099	0.858567	20.7103	20.4824	21.3872	20.7631	20.7467	20.6432	20.4029	20.558	20.797	20.1481
MSMEG_0970	-0.177479	0.33795	20.9481	20.7486	20.2236	20.1431	NaN	20.1782	NaN	20.2806	20.6553	20.2395
MSMEG_0989	-0.771518	0.838733	23.8803	24.1792	23.721	24.023	23.3109	21.3451	23.8222	23.4293	22.9316	23.7286
MSMEG_1060	-0.234828	0.451308	25.7091	25.0717	24.7096	24.6432	24.8275	25.0527	24.2619	24.862	24.6623	24.9481
MSMEG_1066	-0.168314	0.425489	22.4785	22.4977	21.8858	21.7883	21.8941	22.2329	22.0551	21.8345	21.8187	21.7617
MSMEG_1089	0.198187	0.461678	22.6121	22.7804	22.7609	23.1106	22.9106	22.7165	23.2532	22.7145	22.8499	23.6313
MSMEG_1136	-0.188981	0.412112	23.4232	23.682	22.7923	22.7987	22.92	22.8293	23.0729	22.9325	22.6311	23.2055
MSMEG_1216	-0.194896	1.41081	20.2514	20.3582	20.0242	20.2339	20.2287	19.9516	19.9952	20.0868	19.878	20.2103
MSMEG_1236	0.818253	4.36286	20.4832	20.2823	20.1159	19.9396	20.0765	21.1182	20.977	21.0663	20.9076	20.9197
MSMEG_1331	-0.270042	1.28146	20.339	20.5038	20.7682	20.6034	20.6811	20.3225	20.2888	20.6267	20.2571	20.0502
MSMEG_1341	0.0950504	0.23196	23.0034	23.2548	23.0077	22.5637	22.5582	22.7473	22.83	23.2261	23.1786	22.881
MSMEG_1350	0.0138145	0.0170168	21.0087	20.7035	21.2315	20.4105	20.2664	21.2901	20.9315	20.9218	20.4848	20.0613
MSMEG_1356	0.127988	0.449488	21.5646	20.9632	20.9208	21.1237	21.1673	21.2885	21.1991	21.1198	21.4985	21.2736
MSMEG_1410	-0.277529	0.587245	21.1459	20.6716	21.1221	21.6575	21.0703	21.1459	21.1301	20.8951	20.8761	20.2326
MSMEG_1428	-0.161636	0.773161	20.3527	NaN	20.2641	20.1571	20.6282	20.2232	20.3174	20.0704	20.0726	20.2609
MSMEG_1438	-0.463493	1.44455	27.343	26.9366	26.7974	26.7568	27.4655	26.8401	26.5703	26.4637	26.2574	26.8503
MSMEG_1441	-0.134053	0.885232	26.2265	26.2986	25.9682	26.0478	26.1726	26.2025	26.0366	25.9388	25.9345	25.931
MSMEG_1465	-0.331647	1.19362	25.2834	24.8325	24.4886	24.6553	24.8396	24.6635	24.3333	24.2864	24.6591	24.4989
MSMEG_1528	-0.261502	0.933502	24.7629	25.0932	24.407	24.3947	24.5799	24.5903	24.4669	24.3956	24.1621	24.3153
MSMEG_1554	-0.315837	0.499923	22.5414	22.2828	21.4497	21.7549	22.5317	21.7259	21.5936	21.8937	21.2844	22.4837
MSMEG_1567	-0.567994	1.63619	22.3124	22.4808	21.8176	21.8108	22.2585	21.0955	21.7159	21.6893	21.3791	21.9604
MSMEG_1661	-0.288712	1.45326	20.8463	21.0184	20.5969	20.7325	20.688	20.6125	20.1498	20.6302	20.4888	20.5571
MSMEG_1805	-0.183309	1.11174	22.7464	22.7911	22.4531	22.4387	22.6308	22.5621	22.2379	22.4185	22.4368	22.4882
MSMEG_1812	0.339483	1.22764	23.32	23.4795	23.4102	23.8875	23.229	23.986	23.7894	23.4347	24.0249	23.7887
MSMEG_1820	-0.0485355	0.182674	23.5955	23.5495	23.4906	23.7655	23.5509	23.6307	23.4859	23.2808	23.8457	23.4661
MSMEG_1831	0.0221191	0.0421121	22.9381	23.0164	22.5283	22.7099	23.3633	23.185	22.9216	22.5959	22.7628	23.2014
MSMEG_1852	-0.362204	1.34525	22.2594	22.0115	21.8097	21.4762	21.9763	21.832	21.4923	21.4768	21.3431	21.5779
MSMEG_1874	5.41687e-05	9.69586e-05	21.6591	21.0504	21.5387	21.4832	21.2081	21.6398	21.1044	21.4545	21.7604	20.9807
MSMEG_1954	-0.325238	0.796394	21.8917	21.4615	20.8372	20.9453	21.1207	20.8049	20.8591	20.8478	20.8545	21.2638
MSMEG_1958	-0.248564	0.634936	21.3852	21.4255	20.5884	20.9718	21.1372	20.7423	20.8953	20.625	20.7176	21.2852
MSMEG_2019	-0.0967336	0.203822	NaN	20.5034	21.0263	20.5827	20.464	20.4185	20.9518	20.7714	20.3239	20.2713
MSMEG_2067	0.106778	0.315509	20.0227	19.8034	19.8973	20.4172	20.168	20.4932	19.9563	20.2059	20.2091	19.9781
MSMEG_2112	0.203004	0.443586	21.2019	21.2182	21.2012	21.2489	21.7207	21.2024	20.9739	21.7677	21.7394	21.9226
MSMEG_2174	-0.364507	1.27844	20.6667	21.36	20.832	20.9578	20.8697	20.4718	20.5469	20.7335	20.8792	20.2323
MSMEG_2364	-0.286812	0.372292	24.6017	24.3068	24.0206	23.9474	23.278	23.0086	23.6293	23.6414	23.8161	24.6249
MSMEG_2376	0.620378	1.72672	22.1679	21.8471	21.9835	22.517	22.866	22.5816	22.825	22.8491	23.0733	23.1544
MSMEG_2397	-0.268864	1.79377	24.2252	24.171	23.9595	23.8471	24.0535	23.9009	23.762	23.902	23.7418	23.6052
MSMEG_2437	0.410907	1.53911	22.695	22.6588	22.5116	23.0099	22.9186	22.996	23.4305	22.8709	23.0471	23.504
MSMEG_2441	-0.289709	1.28654	20.7036	20.7191	20.392	20.9158	20.91	20.3446	20.2279	20.3655	20.556	20.698
MSMEG_2458	-0.2533	2.20889	21.1498	21.2567	20.9947	21.0093	21.1938	20.8776	20.7152	21.0016	20.8614	20.882
MSMEG_2587	-0.559853	0.788136	26.138	25.9779	24.5085	25.0237	24.996	24.877	24.5766	24.8158	24.8065	NaN
MSMEG_2618	-0.507009	0.913987	20.1202	20.683	20.7893	19.9549	NaN	19.6151	20.4473	NaN	19.7856	19.6714
MSMEG_2648	-0.5291	2.36677	20.8267	NaN	20.5795	20.464	20.8605	19.9711	20.007	20.1476	20.1962	20.446
MSMEG_2659	-0.497889	1.88452	NaN	20.025	20.5628	20.4043	20.2868	19.9802	19.8731	20.0231	19.7687	19.4641
MSMEG_2670	-0.119641	0.218568	21.2864	21.2405	21.9182	21.3408	21.4308	21.5139	20.9761	21.9638	21.08	21.0845
MSMEG_2687	0.252025	0.580597	20.9416	NaN	20.5041	21.3308	20.5805	21.0538	NaN	20.9828	21.3121	21.0164
MSMEG_2700	0.308785	1.50307	23.2963	23.481	23.1413	23.1608	23.4266	23.9579	23.4933	23.3848	23.5727	23.6412
MSMEG_2756	-0.281345	1.38135	23.6655	24.0816	23.4406	23.6829	23.6896	23.4852	23.5812	23.2594	23.4083	23.4193
MSMEG_2762	-0.161316	0.554343	21.003	21.0435	20.6985	20.6022	20.4849	20.4941	20.682	20.3577	20.6378	20.854
MSMEG_2944	0.0576134	0.170718	NaN	20.7258	20.4497	20.4526	20.7001	20.5858	20.7015	20.4035	20.5165	20.9909
MSMEG_2961	-0.015659	0.0587018	22.2886	22.1114	21.907	21.812	22.0343	22.0109	22.0005	21.9923	21.8874	22.1838
MSMEG_2983	-0.0550804	0.1138	24.7471	25.6189	25.3167	24.9104	24.9701	25.2563	24.7809	25.2214	24.9127	25.1166
MSMEG_3003	-0.711948	3.48969	22.8492	22.7113	22.3702	22.4798	22.7102	21.9834	21.7467	21.8679	21.7733	22.1897
MSMEG_3066	0.22835	1.25867	23.0312	22.7516	23.2406	23.1172	23.0967	23.4289	23.2016	23.298	23.3671	23.0835
MSMEG_3126	0.046701	0.0736989	22.0798	21.9222	21.1118	21.2097	21.5974	21.7455	21.6349	21.3372	21.3894	22.0474
MSMEG_3144	-0.244406	1.22887	22.3135	22.4172	21.9633	22.0249	22.1314	21.9286	21.6525	22.0234	21.9895	22.034
MSMEG_3226	-0.225697	0.830927	20.231	19.9752	20.4622	20.3352	20.2471	20.1965	NaN	20.0873	19.6728	20.1412
MSMEG_3308	-0.252821	1.2541	23.8048	23.3488	23.214	23.3802	23.5284	23.3982	23.2126	23.1363	23.1435	23.1215
MSMEG_3347	-0.196989	1.80109	20.3689	20.4961	20.5081	20.5618	20.469	NaN	20.1113	20.3448	20.353	20.326
MSMEG_3380	-0.0359959	0.128435	22.6726	22.4753	22.568	22.5644	22.3454	22.7428	22.4052	22.3525	22.6678	22.2775
MSMEG_3434	-0.260724	1.0498	24.796	25.0104	24.4392	24.3694	24.4315	24.3667	24.3946	24.4847	24.1828	24.3142
MSMEG_3491	-0.029784	0.0309774	22.9469	22.6251	21.5384	21.5201	22.1304	22.2552	21.9326	21.6373	22.1066	22.6803
MSMEG_3538	0.154526	0.39387	19.4355	19.5802	19.7882	19.7042	NaN	19.9337	19.6266	19.4385	20.1274	NaN
MSMEG_3576	0.0554134	0.0996155	20.5501	20.608	21.0883	20.82	20.8338	20.9355	20.5407	21.2455	21.1643	20.2913
MSMEG_3607	-0.427716	1.87047	20.0395	19.5958	19.5682	NaN	19.5533	19.1805	19.2834	19.1044	19.22	19.5192
MSMEG_3678	-0.183075	0.805382	20.3465	20.6292	20.3203	20.5569	20.7792	20.2175	20.6115	20.4115	20.3063	20.1697
MSMEG_3745	-0.157701	0.333198	21.2285	NaN	22.0989	21.5924	21.427	21.2445	21.439	21.7532	21.5531	21.155
MSMEG_3750	-0.399204	1.47409	NaN	20.581	21.0678	20.846	20.5522	20.1498	20.5165	20.4469	20.337	NaN
MSMEG_3752	0.273162	0.36757	21.6105	22.6543	22.3523	21.5804	21.3878	22.0992	22.1918	22.3921	21.4727	22.7953
MSMEG_3807	-0.0966879	0.339639	NaN	19.5061	19.8226	19.6315	19.1868	19.4714	19.4677	19.4473	19.4995	19.3144
MSMEG_3908	-0.0507583	0.0996357	20.3482	20.1258	20.5965	20.1672	NaN	20.1806	20.3932	20.6942	20.2091	19.8162
MSMEG_4114	-0.152235	0.722537	22.3892	22.3889	22.6519	22.7621	22.4455	22.51	22.3126	22.2842	22.5838	22.1858
MSMEG_4121	-0.393296	1.28439	NaN	21.9259	21.2498	21.4537	21.8954	21.3379	20.964	21.3533	21.2113	21.323
MSMEG_4165	-0.632271	1.18613	21.5201	20.9663	20.8516	21.123	20.6581	20.8144	20.3975	19.6255	20.7288	NaN
MSMEG_4195	-0.0990482	0.249944	22.2443	21.9148	22.1273	22.2574	22.3435	22.4573	21.6206	22.2796	22.1323	21.9023
MSMEG_4199	0.650401	0.937582	22.1878	23.3401	21.7068	22.6313	22.1455	22.6363	23.0448	23.0735	22.5722	23.9368
MSMEG_4207	-0.455573	0.417855	NaN	23.0319	21.9339	21.6706	23.3581	21.7907	22.3624	21.3892	21.6586	23.0144
MSMEG_4251	-0.303954	1.29564	22.1168	22.0338	21.7	21.6599	21.6714	21.7208	21.3086	21.4898	21.7516	21.3914
MSMEG_4258	-0.122239	0.358019	20.6084	20.2551	20.6723	20.116	20.1272	20.2855	20.161	20.2318	20.5254	19.9641
MSMEG_4274	-0.236515	1.11411	20.452	20.8139	20.3008	20.3334	20.1898	20.3433	20.1805	20.1561	20.0654	20.1621
MSMEG_4275	-0.450435	2.7494	21.1377	21.398	21.2575	21.3076	21.4436	20.9308	21.1154	20.8651	20.7492	20.6317
MSMEG_4285	-0.140601	0.698425	21.427	21.1267	21.4025	21.1246	NaN	21.3272	21.0207	21.2032	21.0346	21.0623
MSMEG_4337	0.0258316	0.0759217	22.6474	22.5157	22.9429	22.8822	22.7586	22.7319	22.6251	23.0512	22.9354	22.5326
MSMEG_4382	-0.174789	0.728244	21.6796	21.8047	21.5428	21.5709	21.1508	21.439	21.4222	21.3968	21.174	21.4429
MSMEG_4537	-0.0692368	0.21516	21.9756	21.7386	22.1285	22.2001	22.0006	21.9344	21.9793	22.2719	21.8867	21.6248
MSMEG_4581	0.13081	0.504935	19.6567	NaN	19.6427	19.7454	19.4263	19.6065	19.7246	19.9259	19.9854	19.5006
MSMEG_4583	-0.0516014	0.105885	20.8833	20.2748	20.1185	20.2674	20.5605	20.0688	20.5277	20.0816	20.5743	20.594
MSMEG_4625	-0.247969	0.418507	27.4097	27.5691	26.8915	26.93	27.2454	26.811	27.3153	26.7312	26.3097	27.6385
MSMEG_4647	-0.486701	2.06754	21.1302	21.3447	21.2096	NaN	20.8393	20.6717	20.3735	20.7654	20.5492	20.8614
MSMEG_4661	-0.253712	0.587642	20.5137	20.6482	20.7356	21.1092	21.397	20.7521	21.0599	20.3107	20.4388	20.5736
MSMEG_4673	-0.128479	0.352165	25.0815	24.4452	24.8895	24.805	24.9077	24.871	24.5037	24.7394	25.0172	24.3551
MSMEG_4681	-0.165878	0.719852	21.6363	21.1998	21.144	21.3577	21.3348	21.0821	21.0776	20.9863	21.4167	21.2804
MSMEG_4689	-0.273941	1.18208	22.8603	22.8915	22.3643	22.3819	22.5506	22.2153	22.2821	22.4112	22.5351	22.2353
MSMEG_4707	0.00776405	0.016925	21.2142	21.6445	21.7552	21.7509	21.6701	21.2123	21.4761	21.7094	21.8157	21.8603
MSMEG_4713	0.0856135	0.262693	21.0083	20.8756	21.2856	21.1936	21.2464	21.0786	NaN	20.955	21.3296	21.4668
MSMEG_4906	-0.394749	2.67181	27.1821	27.3309	26.8787	26.9685	27.1969	26.754	26.7243	26.8115	26.6768	26.6167
MSMEG_4914	-0.00470886	0.00890451	21.2281	21.3785	21.2985	21.3608	20.9944	21.6383	21.1863	21.543	21.1659	20.703
MSMEG_4948	-0.0410256	0.068485	NaN	21.0232	20.9025	21.1632	21.216	20.6356	21.0338	20.8838	21.5878	NaN
MSMEG_5081	-0.632025	1.93347	28.5119	28.8024	28.3232	28.1114	28.7662	27.7258	28.0101	27.8948	27.4324	28.2918
MSMEG_5087	0.0465343	0.0885237	22.1251	21.6874	22.6211	22.2738	22.3803	22.2463	22.4426	22.5868	22.0938	21.951
MSMEG_5118	-0.116016	0.332289	20.5055	20.5035	20.6798	20.957	20.8232	20.8256	20.4737	20.8422	20.5669	20.1806
MSMEG_5196	0.612799	0.430524	25.3254	26.8078	24.483	25.4383	27.0512	25.0828	27.0743	25.7467	27.0634	27.2025
MSMEG_5209	-0.0529758	0.109084	21.8249	21.8706	21.6812	21.2421	21.1891	21.917	21.4842	21.3225	21.3156	21.5038
MSMEG_5285	-0.214678	1.58745	20.396	20.5138	20.5536	20.4188	20.498	20.0084	20.3704	20.3023	20.2051	20.4207
MSMEG_5286	-0.578419	1.01737	21.5773	21.2473	20.8682	NaN	21.1141	21.0121	20.1397	NaN	20.2343	21.107
MSMEG_5291	-0.158286	0.298991	20.8804	20.6094	21.5921	21.1793	20.9648	21.1409	20.7901	21.2892	20.8105	20.4037
MSMEG_5401	0.00485687	0.00690227	20.5282	20.6146	20.7498	21.2702	21.6002	20.735	20.7004	20.8775	21.22	21.2545
MSMEG_5438	-0.190457	0.309029	22.0053	21.5203	21.1746	21.0925	21.4101	21.2326	21.0896	20.5662	21.6159	21.7462
MSMEG_5452	-0.26694	1.16303	21.4038	21.446	20.9251	21.0906	21.1714	20.8878	20.9911	20.7714	21.2306	20.8213
MSMEG_5494	-0.305846	0.930718	20.1935	19.5007	19.806	20.0964	20.0204	19.8967	NaN	19.3572	19.555	19.6612
MSMEG_5536	-0.199318	0.469981	23.3246	23.2519	22.7791	23.0387	22.9618	22.417	23.2275	22.7775	22.6434	23.2942
MSMEG_5678	-0.292884	1.0251	NaN	19.8488	19.4745	19.5755	19.8698	19.14	19.6756	NaN	19.4058	19.3756
MSMEG_5691	-0.192609	1.3985	22.0731	22.0981	22.051	21.7758	22.1934	21.9835	21.8158	21.8023	21.7828	21.8439
MSMEG_5722	0.16574	0.270037	25.2765	25.4142	25.4945	25.3225	25.7791	25.1917	25.371	25.7043	25.3221	26.5265
MSMEG_5732	-0.169289	0.214086	22.1254	21.9007	21.7258	20.893	20.8753	21.7825	21.3625	21.612	21.2048	20.7119
MSMEG_5735	-0.268947	0.441456	19.7302	19.5588	20.664	19.8494	19.7267	19.5374	20.0965	20.0655	19.0557	19.4293
MSMEG_5736	0.00257454	0.00670367	21.3836	21.4054	21.3219	21.2435	20.992	21.3402	21.1551	21.3071	21.5997	20.9572
MSMEG_5792	-0.11916	0.941736	23.06	22.8902	22.8974	22.8445	23.0067	22.9769	22.725	22.9251	22.7332	22.7427
MSMEG_5831	-0.24976	1.97596	22.5221	22.6377	22.5933	22.423	22.5129	22.3057	22.3438	22.3347	22.4196	22.0364
MSMEG_5878	-0.408759	1.61237	23.3596	23.1878	22.6492	22.797	22.8801	22.781	22.4312	22.5347	22.4193	22.6636
MSMEG_6001	-0.128208	0.321695	20.0276	NaN	20.605	20.6486	20.2581	20.1249	20.2885	20.4944	19.957	20.4182
MSMEG_6036	-0.0704376	0.196596	20.3662	20.5823	20.7352	20.8432	21.1345	20.6776	20.7784	20.7367	20.697	20.4196
MSMEG_6039	-0.277003	1.43132	21.2447	NaN	21.1208	21.0676	21.0387	20.9973	20.7535	20.9933	20.6196	NaN
MSMEG_6128	-0.036298	0.0300219	20.6097	22.1998	22.274	22.3516	22.5907	21.1131	22.237	21.9365	22.3306	22.2272
MSMEG_6227	-0.391017	1.59366	22.1281	22.5144	21.7034	22.1409	22.2698	21.7532	21.742	21.723	21.6234	21.96
MSMEG_6229	-0.0473576	0.120511	20.3757	19.9305	20.6573	20.4146	20.3832	20.3208	20.073	20.4925	20.5116	20.1267
MSMEG_6278	-0.0812855	0.463457	21.1093	21.1565	21.0624	21.411	20.9769	21.1028	20.9329	21.0924	21.1262	21.0554
MSMEG_6280	-0.327959	0.980902	25.3654	25.8998	25.2683	25.4233	25.5716	24.9889	25.2718	25.0914	24.8614	25.6749
MSMEG_6283	-0.508649	2.49659	20.8781	20.8147	20.4696	20.2728	20.4422	19.9567	19.9897	20.1421	20.1355	20.1102
MSMEG_6292	0.489729	1.31615	19.8691	20.0579	19.3291	20.0141	19.9313	20.1403	20.2754	19.8691	20.5473	20.8181
MSMEG_6319	-0.165781	0.663932	20.4851	20.565	20.2462	20.0587	20.3891	20.0726	20.1641	20.2314	19.9727	20.4745
MSMEG_6320	-0.0627716	0.121096	21.4269	21.3289	21.0045	21.6365	21.965	21.4803	21.3493	21.0051	21.6579	21.5553
MSMEG_6328	-0.237426	1.84928	22.6011	22.4822	22.8076	22.6404	22.6955	22.3094	22.2677	22.5678	22.454	22.4408
MSMEG_6373	-0.0747856	0.243882	20.9084	20.63	20.8835	21.0279	20.944	21.2138	20.8182	20.6551	20.6354	20.6974
MSMEG_6380	-0.218616	0.821583	21.3009	21.0769	20.6651	20.8588	20.7397	20.9635	20.7432	20.5215	20.6263	20.6938
MSMEG_6485	-0.182577	0.644537	21.9572	21.6301	21.8744	21.8462	21.6119	21.912	21.7335	21.7296	21.3076	21.3244
MSMEG_6521	-0.330098	0.813969	20.4451	20.6877	20.3709	20.7694	20.9727	19.6501	20.3498	20.3448	20.6157	20.6348
MSMEG_6541	-0.0880707	0.267777	21.7389	22.5365	22.2455	22.1755	22.3311	22.0608	22.272	22.1231	22.0588	22.0725
MSMEG_6579	-0.0644009	0.0343214	24.7655	25.3528	24.7689	25.3592	27.092	24.4347	25.1671	25.1387	24.9603	27.3156
MSMEG_6663	-0.0264713	0.0648915	21.1426	21.0139	21.0502	21.0993	21.6317	21.1926	20.8006	21.205	21.2896	21.3175
MSMEG_6685	-0.196028	0.77866	21.1676	20.4689	21.024	21.0138	20.8673	20.7658	20.8703	20.6592	20.6651	20.6011
MSMEG_6730	-0.165673	0.403608	20.963	20.9646	21.6408	21.2556	NaN	NaN	20.9594	21.2525	21.0826	20.8668
MSMEG_6743	0.683174	1.3435	20.4168	21.4695	21.4031	20.6034	21.6013	21.3843	21.951	21.5941	21.7056	22.2748
MSMEG_6875	0.182964	0.732068	21.052	20.9783	21.1349	21.3998	21.1028	21.5145	21.4762	21.4366	21.1846	20.9706
MSMEG_6913	-0.401847	2.41488	23.7867	23.6625	23.3483	23.6467	23.7889	23.2409	23.3221	23.0963	23.1409	23.4237
MSMEG_0048	-0.312667	0.988525	21.6241	21.5257	22.1802	21.8253	21.7295	21.3846	21.7291	21.6917	21.0245	21.4917
MSMEG_0058	-0.27197	0.772995	24.1828	23.9829	23.4666	23.5792	23.9436	23.8141	23.2551	23.4145	23.4397	23.8717
MSMEG_0077	-0.292184	0.477255	24.0103	23.8549	23.1706	23.0809	23.5074	23.3998	23.2058	23.0883	22.5663	23.9029
MSMEG_0086	-0.372384	0.554747	21.6693	21.1757	20.8934	19.9051	20.6048	20.7484	20.3227	20.6486	20.0558	20.6108
MSMEG_0097	-0.151385	0.775373	20.676	20.4132	20.5736	20.4388	NaN	20.513	20.4429	20.1677	20.3724	NaN
MSMEG_0212	-0.118399	0.416667	22.9422	23.2869	22.7001	23.1602	22.9765	23.0695	22.91	22.6996	23.0697	22.725
MSMEG_0243	-0.407122	0.81233	30.3487	30.6456	29.7031	29.901	30.3445	29.6267	29.9211	29.5886	29.3117	30.4589
MSMEG_0371	-0.353708	1.03124	22.1037	21.4686	21.1572	21.3832	21.8328	21.5131	21.1508	21.0439	21.2346	21.2345
MSMEG_0380	-0.100038	0.270746	22.4518	22.4753	22.0018	22.1625	22.4216	21.9967	21.8259	22.439	22.4117	22.3394
MSMEG_0388	-0.0419716	0.118193	21.3418	21.4613	21.5211	21.3692	21.7812	21.5014	21.3944	21.3282	21.8402	21.2008
MSMEG_0451	-0.394278	0.623649	27.2662	27.3642	26.8158	27.1497	27.7788	26.4704	26.8747	26.8216	26.3641	27.8724
MSMEG_0455	-0.324651	1.31456	21.5445	21.5597	20.9739	21.1877	21.5499	21.08	20.8296	20.9316	21.2326	21.1186
MSMEG_0532	-0.117715	0.367889	21.4188	21.0431	20.7794	20.7099	21.1059	21.0486	20.721	20.8193	20.8548	21.025
MSMEG_0628	-0.152441	0.458341	21.0378	21.2054	21.6455	21.2974	21.441	20.9234	21.2605	21.4466	21.3443	20.8902
MSMEG_0629	0.109509	0.277576	20.7193	20.6356	21.029	21.1539	20.9038	21.185	20.8396	21.1608	21.2641	20.5396
MSMEG_0637	-0.129581	0.604102	20.4514	20.3142	20.4611	20.3941	20.7977	20.1941	20.2186	20.444	20.5161	20.3979
MSMEG_0784	-0.0741615	0.0838019	NaN	21.7326	22.2765	21.1897	21.2041	21.3767	21.0875	21.9644	21.6776	NaN
MSMEG_0806	-0.25558	0.56773	21.5255	21.6946	21.6329	20.8798	21.5257	21.271	20.6509	21.5018	21.4939	21.063
MSMEG_0819	-0.139855	1.17041	23.5462	23.6884	23.5772	23.5234	23.7228	23.4078	23.4117	23.6293	23.438	NaN
MSMEG_0828	-0.140663	0.257246	25.3152	25.0159	24.5561	24.2815	24.6977	25.0804	24.2364	24.5929	24.513	24.7403
MSMEG_0901	-0.145297	0.528861	24.3244	24.4056	23.9824	24.1173	24.2131	24.3625	23.7314	23.9996	24.2051	24.0178
MSMEG_0937	-0.133314	0.402016	21.8427	22.0679	22.1418	22.017	21.6971	21.9421	21.9473	22.012	21.8699	21.3287
MSMEG_0978	-0.00194817	0.00293646	20.2499	20.3795	21.0773	20.8006	20.7161	20.8527	20.6741	21.0291	20.6167	20.041
MSMEG_1097	-0.0651089	0.105792	21.8099	21.0899	21.8178	21.705	21.8397	21.9459	21.1496	22.0161	21.6146	21.2107
MSMEG_1108	-0.241359	0.732514	22.6026	22.3291	21.9846	21.8417	22.0633	22.2395	21.6516	21.8207	21.9866	21.9161
MSMEG_1260	0.171	0.299151	21.1591	20.996	20.565	20.9466	20.1347	NaN	20.7949	21.0486	20.6266	21.2551
MSMEG_1340	-0.307537	0.90245	22.6368	22.7165	22.6307	22.6299	22.6034	21.7554	22.442	22.5291	22.8026	22.1505
MSMEG_1383	-0.0101795	0.0316525	23.3719	23.3042	22.9098	23.0299	23.2363	23.2458	23.2128	23.0991	22.9182	23.3253
MSMEG_1403	0.25074	0.352626	22.7263	21.8099	21.5706	22.0542	22.3814	22.264	22.1406	22.0087	22.0991	23.2836
MSMEG_1451	-0.0603363	0.0867622	19.8855	20.1187	21.0558	20.4125	20.4556	20.2372	20.5931	20.7792	20.1467	19.8701
MSMEG_1471	-0.217577	0.432055	28.7456	28.3	27.8538	28.0132	28.4163	28.5657	27.9376	27.761	27.6792	28.2976
MSMEG_1474	-0.0792618	0.235307	27.2618	27.3341	26.7883	26.9563	26.9017	27.2301	27	26.7517	26.7953	27.0687
MSMEG_1525	0.836537	1.3284	23.368	22.5023	22.6449	23.1455	23.2396	23.9822	23.8437	23.0471	23.3403	24.8698
MSMEG_1544	0.149565	0.288469	25.4009	25.4036	24.5728	25.1112	25.4423	25.5403	25.5107	25.0018	24.9688	25.6571
MSMEG_1556	0.066328	0.201071	25.0239	24.7517	24.7629	24.9782	24.9358	24.9475	25.1169	24.4958	25.1175	25.1065
MSMEG_1600	-0.374894	1.54458	21.1009	21.4726	20.9098	20.7865	20.8525	20.5802	20.643	20.6314	20.4968	20.8965
MSMEG_1637	-0.366475	1.43753	22.408	22.1573	21.968	21.9774	21.7309	21.8542	21.3597	21.8231	21.5855	21.7866
MSMEG_1681	-0.0637421	0.108936	26.33	26.0726	26.925	26.4723	27.0599	26.1728	26.3052	26.7253	26.5598	26.7779
MSMEG_1734	0.423057	0.884654	20.5569	21.0818	21.5426	20.7193	20.0787	21.2695	21.127	21.3399	21.0926	21.2656
MSMEG_1850	-0.189651	0.377113	20.5981	20.0938	19.8274	19.75	NaN	20.0682	19.6395	19.5475	19.9132	20.2201
MSMEG_1891	-0.120222	0.405395	21.8654	21.5211	21.3471	21.1735	21.4611	21.4637	21.2314	21.2865	21.2219	21.5635
MSMEG_1945	-0.211021	0.907702	22.4998	22.6095	22.3235	22.171	22.5805	22.3479	22.1939	21.9406	22.1706	22.4762
MSMEG_2029	0.109647	0.375021	19.651	19.8714	19.4375	19.7264	19.4864	19.731	19.7994	19.4711	19.9753	NaN
MSMEG_2045	-0.107514	0.388761	20.999	21.3812	21.5765	NaN	21.2268	21.2684	21.2053	21.2965	21.1706	21.0011
MSMEG_2066	-0.138839	0.448178	21.0301	20.7383	21.1508	21.1722	21.0887	20.7297	20.7391	21.3207	20.9929	20.7035
MSMEG_2083	-0.182118	0.45875	21.9669	21.4707	21.3667	21.359	21.3239	21.6278	20.9862	21.0061	21.3674	21.589
MSMEG_2092	-0.324306	2.20999	23.6453	23.9648	23.5336	23.7104	23.733	23.386	23.3645	23.2946	23.5921	23.3284
MSMEG_2115	0.0985695	0.268369	22.7612	23.4769	23.1159	23.212	23.2387	22.8621	23.3919	23.3056	23.3776	23.3604
MSMEG_2205	-0.195626	0.618353	21.5029	21.6042	21.923	21.8385	21.7242	21.7467	21.4699	21.8514	21.4678	21.0789
MSMEG_2224	-0.0348202	0.0848475	20.2721	20.4221	20.6025	19.9777	20.027	20.1278	20.2119	20.3683	19.9422	20.4771
MSMEG_2276	0.134843	0.724569	20.8526	20.4344	20.6333	20.69	20.7302	20.8366	20.6819	20.8633	20.6403	20.9925
MSMEG_2350	-0.136063	0.300545	21.7287	22.0532	21.854	21.0184	21.5901	21.5678	21.2307	21.6329	21.4471	21.6856
MSMEG_2418	-0.0127411	0.03708	23.2852	23.2116	23.6714	23.221	23.1103	23.145	23.1367	23.4046	23.4942	23.2554
MSMEG_2487	-0.00698242	0.0160233	20.8345	20.5828	21.1776	20.9339	20.8787	21.1167	20.9235	21.0179	20.865	20.4495
MSMEG_2511	0.802205	2.84343	22.2241	22.5081	22.8341	22.5324	22.4935	23.4704	23.14	23.5926	23.5346	22.8657
MSMEG_2529	0.120719	0.353379	21.6957	21.3094	21.6908	21.5915	21.5644	21.7905	21.5577	22.0169	21.2512	21.839
MSMEG_2598	-0.380688	2.23347	21.4406	21.5221	21.5805	21.6074	21.1451	20.957	21.2048	21.0238	21.2347	20.9719
MSMEG_2614	-0.128282	0.276712	21.544	21.4281	22.0146	21.4891	21.6649	21.4826	21.5851	21.9811	21.5013	20.9493
MSMEG_2625	-0.310186	1.65721	21.4419	21.3195	21.1256	21.0323	21.2072	21.0631	20.898	20.8666	21.1067	20.6411
MSMEG_2629	-0.395311	1.39134	24.7275	24.8347	24.215	24.3615	24.6259	24.2028	24.2989	24.0278	23.7985	24.46
MSMEG_2652	-0.389774	1.56574	21.5785	21.8445	21.3143	21.5938	21.9875	21.1023	21.4917	21.1766	21.1289	21.47
MSMEG_2728	-0.378556	1.68461	21.0965	21.1199	20.5131	20.8164	20.9685	20.3779	20.4507	20.4192	20.625	20.7488
MSMEG_2744	-0.189854	0.663289	23.0604	23.1925	23.1409	23.3901	23.1927	23.3842	23.0875	22.8997	23.071	22.5849
MSMEG_2771	-0.162197	0.419585	22.5579	22.1294	22.859	22.8086	22.6896	22.4877	22.5132	22.5758	22.6592	21.9977
MSMEG_2800	-0.174766	1.05298	22.6256	22.2271	22.2578	22.312	22.52	22.3158	22.1237	22.2967	22.2374	22.095
MSMEG_2926	-0.114709	0.152379	20.6996	20.3479	20.1693	20.5149	21.0425	20.3983	19.7439	20.1164	20.7574	21.1845
MSMEG_2964	-0.359431	1.36281	22.2664	22.0871	21.6927	21.5694	21.7904	21.7368	21.3008	21.6403	21.5	21.4308
MSMEG_3036	0.0434715	0.131759	23.6231	24.0694	24.0347	24.2847	24.0686	23.9882	24.1082	24.2233	24.1289	23.8493
MSMEG_3046	-0.156408	0.435436	22.5246	22.5669	22.008	22.1398	22.493	22.1217	21.9292	22.1683	22.0999	22.6312
MSMEG_3056	-0.238954	1.14295	21.084	20.9484	20.9238	20.7185	20.8459	20.7964	20.425	20.6699	20.955	20.4796
MSMEG_3070	0.0310658	0.127787	23.7929	23.6394	23.6821	23.6217	23.9514	23.5037	23.8454	23.8677	23.7598	23.8662
MSMEG_3071	-0.114325	0.4948	22.5061	22.3485	22.412	22.6339	22.3461	22.5563	22.3814	22.3822	22.3649	21.9903
MSMEG_3127	-0.0297493	0.0700253	23.884	24.2404	24.509	24.4485	24.4512	24.6798	24.1615	24.1844	24.1435	24.215
MSMEG_3211	-0.223465	0.677472	22.0418	22.0663	21.541	21.4659	21.5957	21.7024	21.3092	21.4451	21.3267	21.8101
MSMEG_3262	-0.341475	1.31723	21.2489	21.3804	20.5717	20.9458	20.9803	20.8459	20.6089	20.6555	20.6044	20.705
MSMEG_3317	-0.05529	0.204249	20.8707	NaN	20.8832	21.1155	20.7387	20.9709	20.9872	20.9262	20.7361	20.6132
MSMEG_3493	-0.277569	0.828346	27.1797	26.9981	26.6559	26.6179	27.0363	26.8146	26.2879	26.6235	26.3708	27.0032
MSMEG_3500	-0.220547	0.714927	21.4211	21.9901	21.7092	21.6919	22.0182	21.6479	21.3238	21.3662	21.4679	21.922
MSMEG_3540	-0.593474	1.68709	25.5998	25.9018	25.1313	25.2201	25.4688	24.5843	25.0694	24.8505	24.5116	25.3386
MSMEG_3560	-0.0907455	0.195191	22.6047	22.7869	22.5721	22.9669	23.4162	22.8116	22.3941	22.7739	22.9208	22.9928
MSMEG_3602	-0.295606	0.49163	21.0375	20.7764	20.3391	19.545	20.5821	20.4765	20.1362	20.121	19.7725	20.2959
MSMEG_3603	-0.326245	0.482653	20.6019	19.4033	19.8108	19.1825	19.5902	20.0132	19.5953	19.388	18.8984	19.0626
MSMEG_3604	-0.304551	0.752576	23.2486	22.5879	23.1767	22.4271	22.6894	22.3864	22.907	22.676	22.1841	22.4535
MSMEG_3623	-0.120139	0.412761	23.2183	23.3152	23.2188	23.3225	23.2966	23.3108	23.2251	23.4061	23.1648	22.6639
MSMEG_3626	-0.392775	1.42375	25.4987	25.6637	25.0393	24.973	25.3513	25.0783	25.0065	24.7939	24.6306	25.053
MSMEG_3627	-0.0804695	0.196785	24.3007	25.11	24.5776	24.7728	24.6452	24.2945	24.7161	24.7583	24.4554	24.7796
MSMEG_3685	-0.105673	0.225825	21.6075	22.3377	21.7838	21.3032	21.752	21.7687	21.6296	21.6507	21.3371	21.8697
MSMEG_3733	-0.179297	0.688705	26.4694	26.3088	25.9945	25.9229	26.1076	26.2119	25.777	25.841	25.9608	26.116
MSMEG_3883	-0.24438	0.765534	21.5199	21.8649	21.2434	21.1388	21.3005	20.8669	21.3818	21.0894	21.1121	21.3955
MSMEG_3896	-0.10227	0.157585	25.0761	25.0527	24.9849	24.9541	24.0474	24.9231	24.776	24.2846	24.4497	25.1705
MSMEG_3906	-0.0471561	0.199551	21.5059	21.6721	21.8476	21.76	21.879	21.6742	21.516	21.6852	21.9235	21.63
MSMEG_4231	-0.314874	1.16354	20.8543	21.16	20.5575	20.3629	20.7565	20.3242	20.2194	20.4978	20.5428	20.5326
MSMEG_4242	0.224773	0.447403	22.4776	22.1895	22.896	23.3335	23.1062	22.8909	23.1406	22.7965	23.3477	22.9509
MSMEG_4244	-0.500658	1.25379	21.378	21.962	21.4512	20.9587	21.5874	20.6223	21.111	20.868	20.7407	21.4921
MSMEG_4262	-0.0696873	0.130554	22.8881	22.4265	22.1863	22.0336	21.8379	22.1274	22.2565	22.0121	22.5369	22.091
MSMEG_4269	-0.179054	0.263392	20.7719	20.2621	19.8989	NaN	20.0832	20.649	19.8294	19.7247	20.0969	NaN
MSMEG_4321	-0.0468777	0.139962	24.3231	24.7057	24.6164	25.0232	24.8993	24.689	24.6804	24.595	24.8087	24.5603
MSMEG_4326	-0.219519	0.861744	29.3096	29.092	28.6628	28.9731	29.3883	28.913	28.7418	28.8659	28.9117	28.8959
MSMEG_4342	0.0700726	0.194784	25.2521	25.4723	24.9069	24.9732	24.8648	25.3633	24.8871	25.2788	25.2216	25.0688
MSMEG_4353	0.0709221	0.115415	23.5115	22.5992	22.6032	22.6423	22.7487	23.1468	22.4661	22.9868	22.6151	23.2447
MSMEG_4396	-0.326358	1.31418	22.7138	22.0888	22.2273	21.9775	22.42	22.0926	21.7809	21.9157	21.9961	22.0103
MSMEG_4454	-0.0302994	0.0468114	21.4315	22.011	22.3672	22.1783	21.9919	21.6356	22.0784	22.386	22.2078	21.5206
MSMEG_4556	-0.129552	0.523165	21.1642	21.1075	20.777	20.6741	20.8993	20.9288	20.5558	20.7208	20.8987	20.8703
MSMEG_4572	-0.391813	0.542826	21.8819	20.6812	20.5502	NaN	20.9689	20.8266	20.2542	NaN	20.9051	20.5291
MSMEG_4598	-0.114841	0.304056	21.1837	20.9432	20.2432	20.8224	20.8273	20.7892	20.5588	20.6481	20.6549	20.7946
MSMEG_4623	-0.235228	0.545982	NaN	20.1982	19.3087	19.534	19.591	19.5451	19.1177	19.5387	19.2519	19.6603
MSMEG_4624	-0.544621	1.44008	26.4494	26.2693	25.8135	25.7459	26.2903	25.875	25.6241	25.3543	25.0523	25.9396
MSMEG_4631	-0.564206	1.3802	27.1476	27.5524	27.2081	26.6218	26.9906	26.3282	26.5605	26.9077	25.9883	26.9149
MSMEG_4652	-0.160048	0.475906	20.443	20.1293	20.3438	20.3778	20.0839	20.357	20.1799	20.4373	19.9046	19.6989
MSMEG_4662	-0.140244	0.252372	19.7094	19.7208	19.6629	20.1272	20.5045	19.9751	19.5541	19.2937	20.1182	20.0825
MSMEG_4666	-0.0205544	0.0524309	20.8453	21.1559	21.3237	21.153	21.5812	21.1912	20.9843	21.0959	21.3352	21.3497
MSMEG_4715	-0.2265	0.23927	22.3831	20.7649	20.7651	21.3892	21.2179	21.9939	20.6343	20.9365	21.1896	20.6333
MSMEG_4717	-0.142008	0.142126	21.0815	19.849	20.2348	20.2071	20.2353	21.431	19.7439	19.6051	20.0497	20.0679
MSMEG_4884	-0.397982	2.03095	23.0865	23.2588	22.7141	22.8103	23.0216	22.5432	22.6563	22.7251	22.3503	22.6264
MSMEG_4934	-0.21604	0.888195	22.379	22.2643	22.3019	22.3149	22.2802	22.2619	21.7607	22.0998	22.4589	21.8789
MSMEG_4955	0.0422001	0.146501	22.7975	22.9027	23.0021	23.1351	22.7229	22.9953	23.1642	23.0694	22.853	22.6892
MSMEG_4978	-0.087846	0.127013	21.2825	21.0461	20.5206	20.2047	19.873	20.5511	20.3776	20.5566	20.5306	20.4718
MSMEG_5006	-0.0105648	0.028028	23.441	23.6298	23.2389	23.1615	23.5144	23.717	23.1041	23.3721	23.3487	23.3907
MSMEG_5016	-0.274545	0.540739	25.2166	26.08	25.1533	25.4797	25.49	24.8399	25.6459	24.9176	25.0137	25.6297
MSMEG_5185	-0.199794	0.906337	21.2991	21.201	21.5891	21.4984	21.2144	21.1228	21.3911	21.2954	20.8914	21.1023
MSMEG_5245	-0.476946	0.42589	20.2724	21.5137	21.3928	20.4635	22.1191	19.9451	20.2371	20.8476	20.2979	22.0492
MSMEG_5343	-0.399196	0.601776	25.668	26.2195	25.8699	25.9979	26.5046	25.005	25.9018	25.7452	25.0577	26.5542
MSMEG_5423	-0.280943	1.42031	NaN	19.2674	18.9028	19.2235	18.9968	NaN	18.64	18.8912	18.8643	18.8712
MSMEG_5431	1.00201	1.47754	25.1261	24.4205	23.6385	24.6226	24.7201	25.7288	25.6625	24.4217	25.4499	26.2751
MSMEG_5440	-0.0839706	0.581119	21.3852	21.5956	21.3611	21.3948	21.4074	21.4122	21.2958	21.358	21.1656	21.4926
MSMEG_5454	0.0487122	0.120483	21.1669	21.3534	21.7802	21.306	21.5438	21.4181	21.4036	21.8282	21.5786	21.1653
MSMEG_5479	-0.313832	0.669524	25.3018	25.2819	24.6164	24.5854	24.8295	24.6189	24.9189	24.4164	24.071	25.0207
MSMEG_5521	-0.114788	0.456096	20.5898	20.4376	20.5961	20.5895	20.2473	20.5364	20.0976	20.4181	20.4568	NaN
MSMEG_5614	-0.0521351	0.0969281	20.9329	21.8118	21.744	21.7564	21.5436	21.178	21.5322	21.353	21.8519	21.6129
MSMEG_5629	-0.207404	0.447945	20.7701	21.4177	20.4671	20.8668	20.5545	21.0475	20.5393	20.7366	20.3248	20.3909
MSMEG_5666	0.449753	1.23536	23.6837	23.689	23.3231	23.647	23.8753	24.2096	24.0208	23.6091	23.9146	24.7127
MSMEG_5671	-0.215546	0.317702	22.1866	22.3604	21.6581	22.0838	22.5705	21.9389	22.2775	21.3302	21.5306	22.7044
MSMEG_5696	-0.25739	1.32424	25.9893	26.0908	25.5872	25.7525	25.8865	25.7981	25.5596	25.4172	25.5512	25.6934
MSMEG_5702	-0.394153	1.10789	21.9479	21.6865	21.2495	21.1365	21.6053	21.4317	21.0454	20.9007	20.8451	21.4319
MSMEG_5914	-0.3598	1.14156	19.9647	NaN	20.6489	20.4375	20.3111	20.3165	19.9096	20.0605	19.709	19.9079
MSMEG_5989	-0.448627	1.27674	22.9826	23.2128	22.3787	22.573	22.6278	22.1081	22.6091	22.3298	21.9349	22.5499
MSMEG_6020	-0.168083	0.940021	21.8686	21.8766	22.0657	22.0901	22.0718	21.7013	21.6123	21.8705	21.8659	22.0825
MSMEG_6043	-0.311176	0.932759	21.6155	21.8013	21.3094	21.5436	NaN	21.6113	21.1908	21.2274	20.8249	21.427
MSMEG_6095	-0.114138	0.478416	21.7351	21.8351	21.8643	21.7938	22.0125	22.105	21.5927	21.5956	21.5868	21.7901
MSMEG_6097	-0.253881	0.712102	22.3374	22.9356	22.3911	21.9791	22.2266	21.8661	22.0556	22.2825	22.3387	22.0575
MSMEG_6104	0.1438	0.52105	20.7485	20.9662	21.242	20.9035	20.8512	21.0378	20.9421	21.3648	21.2624	20.8233
MSMEG_6114	0.523418	1.53164	24.799	25.4244	25.8164	25.0568	24.8939	25.6518	25.8965	25.8096	25.7111	25.5387
MSMEG_6246	0.433084	1.17266	NaN	21.0921	20.5807	20.6299	21.1486	21.5026	21.5977	20.8301	21.3142	21.2349
MSMEG_6305	0.0949226	0.145698	23.0143	22.706	22.8039	23.1372	23.7947	23.3325	22.6165	23.046	23.451	23.4847
MSMEG_6317	0.101875	0.466174	NaN	21.8584	21.8739	21.6477	21.5363	21.6852	21.6939	21.9774	21.86	21.9382
MSMEG_6434	-0.171764	0.520138	22.6303	22.6268	22.3346	22.7676	23.0437	22.369	22.2712	22.3908	22.8177	22.6953
MSMEG_6502	0.120876	0.139544	24.7894	25.0104	23.952	24.8464	23.8413	24.2288	25.4102	24.2185	24.7761	24.4105
MSMEG_6616	-0.271732	0.483651	20.9568	20.8076	20.9985	20.3059	21.395	20.3408	20.0216	21.0932	20.8199	20.8296
MSMEG_6733	-0.102197	0.205186	21.6551	21.9589	22.5868	22.3587	22.2066	22.1142	22.0251	22.3398	22.1539	21.6223
MSMEG_6802	-0.362578	0.600772	21.296	21.1499	20.1778	20.926	21.0576	20.7406	NaN	20.0177	20.4649	21.0123
MSMEG_0059	-0.29151	1.22835	25.6697	25.4788	25.1946	25.1729	25.5279	25.3231	24.8047	25.0549	25.25	25.1538
MSMEG_0085	-0.525239	0.879689	23.2713	23.0105	22.5088	21.6944	22.4105	22.4265	22.0265	22.1846	21.4926	22.1391
MSMEG_0096	-0.239963	0.423467	23.1501	22.4687	21.958	22.2225	22.4513	22.7099	21.8938	21.9509	22.0102	22.4859
MSMEG_0100	-0.298936	1.85054	23.5748	23.4684	23.1474	23.1338	23.4051	23.1735	22.9974	23.0225	22.9608	23.0806
MSMEG_0114	-0.152079	0.275777	22.9323	22.1494	22.6717	22.1532	22.7441	22.3375	21.8574	22.7777	22.221	22.6967
MSMEG_0261	-0.0447552	0.0916691	22.2146	22.0609	22.7217	22.5891	22.134	22.4831	22.0943	22.5961	22.3863	21.9368
MSMEG_0381	-0.105481	0.277455	21.2966	21.0562	20.8288	20.9513	21.2458	20.8187	20.583	21.0637	21.3875	20.9984
MSMEG_0412	-0.433363	1.2294	22.9585	22.8265	22.4103	22.2968	22.7782	22.4995	21.7944	22.1391	22.0537	22.6169
MSMEG_0456	-0.223109	0.937639	22.0108	21.8324	21.5139	21.4536	21.6616	21.6452	21.436	21.2117	21.5657	21.4981
MSMEG_0645	0.214005	0.588462	23.2454	23.4568	23.9064	23.922	23.4335	23.9226	23.7828	24.0503	23.8808	23.3975
MSMEG_0862	-0.130322	0.69753	23.1219	23.2754	23.1505	23.1689	22.9844	23.0963	23.1156	23.1378	22.9992	22.7005
MSMEG_0876	-0.466322	1.74796	22.6895	22.3624	21.8805	21.9802	22.2137	21.9395	21.5882	21.6767	21.73	21.8603
MSMEG_1001	-0.236494	0.80673	20.8234	21.1314	21.2451	20.7323	20.9179	20.3617	20.7151	20.6371	20.9152	21.0385
MSMEG_1109	-0.100838	0.322203	21.5958	21.8936	22.2718	21.9869	21.9085	21.7207	22.0148	22.0158	21.7909	21.6102
MSMEG_1112	-0.0242208	0.0204136	NaN	19.7881	21.1897	20.2197	20.8974	20.1728	19.9488	21.4631	20.4138	20.4991
MSMEG_1179	-0.0372978	0.145593	21.0554	20.9079	21.3102	21.1885	21.4342	21.2334	21.0377	21.0973	21.1555	21.1859
MSMEG_1255	-0.183529	0.365314	20.7251	19.7349	20.4479	20.0265	NaN	20.3505	19.9355	19.954	20.1717	19.8386
MSMEG_1346	-0.19331	0.491837	27.2931	27.5298	26.7919	26.9879	27.2961	26.9823	27.1884	26.7165	26.6917	27.3535
MSMEG_1466	-0.39397	0.993047	27.4209	27.4543	26.8994	26.9781	27.3536	26.9897	27.0831	26.4887	26.3272	27.2479
MSMEG_1475	-0.0806335	0.208539	22.6561	22.433	23.1456	23.0718	22.8637	22.8818	22.6686	22.9405	22.8008	22.4754
MSMEG_1480	-0.0793427	0.380707	21.5527	21.3513	21.5588	21.3156	21.5179	21.6055	21.4225	21.2549	21.4468	21.1699
MSMEG_1496	0.179576	0.383755	20.1117	21.2805	21.0589	20.6727	20.6466	20.7663	20.9575	21.0366	20.8417	21.0662
MSMEG_1529	-0.437246	1.07541	25.2425	25.4127	24.5881	24.593	24.6212	24.5544	24.8191	24.4661	24.0195	24.4121
MSMEG_1575	-0.03577	0.137179	20.2773	20.376	20.5804	20.6215	20.3471	20.4864	20.285	20.645	20.2406	20.3664
MSMEG_1580	-0.254349	2.55571	21.5636	21.7833	21.7022	21.7489	21.7119	21.3264	21.5688	21.5442	21.403	21.3958
MSMEG_1823	0.0775669	0.211239	21.5793	21.6409	22.1387	21.9032	21.8341	21.8969	22.1137	22.1676	21.6761	21.6297
MSMEG_1936	-0.460631	1.49772	21.6514	20.8733	21.208	20.709	21.0639	20.6503	20.3748	20.8269	20.6882	20.6623
MSMEG_2007	-0.450067	1.09736	21.3459	21.0041	20.463	NaN	21.1124	NaN	20.455	20.4782	20.359	20.8329
MSMEG_2117	-0.257079	1.3244	24.933	24.9358	24.5565	24.6373	25.007	24.7083	24.4713	24.4806	24.4182	24.7059
MSMEG_2353	-0.0838074	0.247763	21.6526	21.7703	21.2274	21.7269	21.4744	21.7554	21.4946	21.4626	21.569	21.1509
MSMEG_2357	-0.279076	0.224714	NaN	21.5113	22.2972	21.4918	20.8241	19.9368	21.5972	22.0014	21.8134	20.9114
MSMEG_2369	-0.328331	1.55686	21.5381	21.4016	NaN	21.3539	21.506	21.0917	21.131	20.9882	20.9106	21.4863
MSMEG_2373	-0.267468	1.84244	23.8578	23.7336	23.4758	23.5795	23.7804	23.5902	23.2804	23.3695	23.4382	23.4113
MSMEG_2375	-0.10481	0.185555	22.1297	21.7956	22.7819	22.2611	22.379	22.3289	22.4058	22.381	21.5715	22.136
MSMEG_2389	-0.292844	0.558842	28.1728	28.1743	27.4794	27.9147	28.1285	27.3025	28.0241	27.3046	27.4309	28.3434
MSMEG_2399	-0.207306	0.571163	22.7826	22.8039	23.421	23.4064	22.8623	22.7086	23.0729	22.8252	23.0438	22.5891
MSMEG_2433	-0.203886	0.524677	20.3448	20.4662	21.068	20.9854	20.9046	20.5973	20.6193	20.7475	20.6691	20.1163
MSMEG_2488	-0.200233	0.575661	19.8355	20.0114	20.4584	20.2614	19.9275	20.1888	19.6552	20.1121	19.962	19.575
MSMEG_2597	-0.16811	0.772323	21.6963	21.738	21.7641	22.1416	21.8521	21.8636	21.6379	21.8331	21.5397	21.4772
MSMEG_2649	-0.273647	0.397707	24.3164	23.4013	23.0386	23.1441	22.4928	23.2718	22.8714	22.902	23.0668	22.913
MSMEG_2760	-0.101921	0.25119	22.7483	22.4469	22.3053	22.0772	22.3199	22.6933	22.0135	22.3721	22.0106	22.2986
MSMEG_2765	-0.262484	1.13647	24.5849	25.1367	24.6983	24.536	24.6141	24.662	24.3885	24.5324	24.2841	24.3905
MSMEG_2769	-0.0745316	0.399901	23.2419	22.9128	23.1491	23.1045	23.3952	23.0355	23.0137	23.1297	23.114	23.1381
MSMEG_2850	-0.278616	0.514162	24.0485	23.8369	23.7815	23.1792	23.2031	23.9535	23.2387	23.4846	23.0947	22.8848
MSMEG_2959	-0.146192	0.34606	22.0265	21.6876	22.1694	22.1978	21.9599	22.3271	21.6372	22.1075	21.8032	21.4353
MSMEG_3041	-0.178192	1.05643	21.8134	22.0654	21.6968	21.6962	21.646	21.609	21.5981	21.7947	21.5282	21.4968
MSMEG_3053	-0.0926125	0.160479	25.6234	26.1802	25.7388	25.8181	25.5947	25.4754	25.9568	25.4474	25.2651	26.3473
MSMEG_3064	-0.481691	2.23181	22.8835	22.7537	22.8996	22.5024	22.5937	22.4005	22.468	22.3552	21.9448	22.0558
MSMEG_3065	-0.473512	2.21875	21.7591	21.7062	21.2452	21.4322	21.5562	20.8368	21.1716	20.9913	20.987	21.3446
MSMEG_3073	0.00975494	0.020374	25.1748	25.6205	24.8809	24.7177	25.1462	25.1833	25.2437	25.0026	24.9522	25.2071
MSMEG_3112	-0.283938	0.515176	21.6179	21.6654	21.3495	21.436	21.7131	20.6451	22.1031	20.8895	21.3413	21.3832
MSMEG_3140	-0.359703	1.44585	22.1057	22.1749	21.5748	21.5872	21.5762	21.4006	21.4009	21.4912	21.3619	21.5657
MSMEG_3152	0.151407	0.553687	21.9618	22.2644	22.2422	22.1873	22.1894	22.4971	22.3669	22.6186	22.1702	21.9493
MSMEG_3155	-0.363219	0.97311	22.205	22.6364	21.8399	21.8412	22.2495	21.4627	21.8042	21.7228	21.6917	22.2746
MSMEG_3183	-0.5456	1.75048	22.0268	22.1906	21.4508	21.3976	21.5705	21.1423	21.3919	21.3295	20.8796	21.165
MSMEG_3259	-0.271534	0.73612	20.8916	20.5966	21.2464	20.8959	20.4829	20.6332	20.8428	20.7904	20.2072	20.2821
MSMEG_3422	-0.166975	0.473416	21.0124	20.9694	21.5476	21.5009	21.5212	21.2922	20.8424	21.4037	21.1352	21.0432
MSMEG_3513	0.262769	0.5667	20.8769	20.8157	21.7626	21.4455	21.5261	21.8912	21.302	21.6357	21.6642	21.2473
MSMEG_3532	-0.738397	1.79855	23.0268	22.9088	23.2355	23.0865	22.6737	21.4002	22.7224	22.3999	22.3037	22.4132
MSMEG_3543	0.0663441	0.13304	22.2824	22.5509	22.4547	22.3947	23.0765	22.4994	22.1963	22.9037	22.6137	22.8778
MSMEG_3645	-0.08214	0.345534	23.3507	23.5226	23.1976	23.4347	23.2753	23.5564	23.0435	23.1562	23.3259	23.2881
MSMEG_3657	-0.223747	0.663551	21.1221	21.1297	21.6147	21.5513	21.3826	21.1789	21.17	21.3934	21.3023	20.6371
MSMEG_3662	0.0404812	0.0806508	23.023	23.529	22.8828	23.1173	23.0106	23.2926	22.8601	22.9616	23.6601	22.9906
MSMEG_3673	-0.103445	0.252908	19.8219	19.8113	19.9295	19.8708	20.2821	19.674	19.3932	20.0948	19.8358	20.2006
MSMEG_3738	-0.29194	0.857939	NaN	21.9547	21.232	21.1726	21.1562	20.9526	21.0691	21.1401	21.1789	21.094
MSMEG_3754	-0.417511	1.86239	23.9386	23.8691	23.3707	23.3871	23.7039	23.2054	23.3163	23.205	23.05	23.405
MSMEG_3791	0.483054	1.56272	27.9192	27.7465	27.5306	27.7152	27.8924	28.5463	27.9262	28.0873	27.9333	28.726
MSMEG_3793	-0.176368	0.441117	26.005	26.0871	25.4349	25.603	26.0208	25.6337	25.8962	25.4209	25.3337	25.9845
MSMEG_3795	-0.205737	0.498969	24.7522	24.4282	23.7462	24.2175	24.4664	24.254	24.1732	23.8084	23.9997	24.3464
MSMEG_3858	-0.313846	1.33043	25.6733	25.8318	25.4775	25.3557	25.8379	25.4097	25.3714	25.2316	25.0203	25.5739
MSMEG_3898	-0.2578	0.506454	22.3203	21.1446	21.4362	21.7782	21.8589	21.6156	21.3174	20.9932	21.6275	21.6954
MSMEG_4320	-0.215326	0.457152	22.2509	21.9436	21.7245	21.9842	21.6641	22.3776	21.4449	21.5395	21.8219	21.3067
MSMEG_4490	-0.0155643	0.0206	20.4228	20.2371	20.9169	20.3719	21.1005	21.0982	20.7912	20.7168	19.9216	20.4434
MSMEG_4504	-0.125775	0.476453	23.2874	23.0771	22.7415	22.7798	22.7554	22.9654	22.7	22.6797	22.7737	22.8936
MSMEG_4528	-0.134477	0.482372	24.0915	23.8394	23.7066	23.7834	24.0638	24.1774	23.6621	23.6484	23.6329	23.6915
MSMEG_4553	-0.184842	0.606958	25.7153	25.8002	25.2092	25.4378	25.3792	25.678	25.203	25.0919	25.2696	25.375
MSMEG_4568	-0.18235	0.904209	21.4925	21.8668	21.5961	21.8271	21.4088	21.5322	21.3279	21.3573	21.6294	21.4327
MSMEG_4650	-0.104324	0.316703	21.5222	21.3439	21.2051	21.9622	21.6203	21.6409	21.3266	21.4284	21.4063	21.3299
MSMEG_4723	-0.326736	0.889422	21.1032	21.0397	20.4246	20.7278	20.6775	20.4106	20.1113	20.3252	21.0004	20.4916
MSMEG_4833	0.183098	0.458107	21.1697	21.2576	21.1793	21.5007	20.8694	21.6086	21.6277	21.4386	21.4301	20.7871
MSMEG_4899	-0.242959	0.653213	22.9488	22.9271	22.4811	22.5632	23.2003	22.6521	22.5531	22.5053	22.2049	22.9903
MSMEG_4905	-0.401723	0.771488	21.9518	21.9701	22.6243	22.1861	21.5465	21.5638	22.1906	21.9666	21.5136	21.0355
MSMEG_4907	0.393202	1.16937	24.774	24.7397	24.2807	24.3719	24.0623	25.2017	24.6442	24.7677	25.0554	24.5256
MSMEG_4940	-0.148518	0.339131	25.0484	24.694	24.3686	24.3713	24.7185	24.3555	24.2876	24.2817	24.4943	25.0391
MSMEG_4977	0.198381	0.21683	NaN	22.9957	22.5616	21.3667	22.0649	22.4642	21.8488	22.6054	22.3595	22.9502
MSMEG_5029	-0.127752	0.272113	22.0686	22.2206	22.0149	21.5439	21.5219	22.0931	21.4243	22.0411	21.6157	21.5569
MSMEG_5053	-0.27249	0.97118	22.1224	21.5846	21.5326	21.6287	21.6193	21.7419	21.3767	21.0879	21.4516	21.4671
MSMEG_5058	-0.421739	2.62903	23.7872	24.0274	23.7457	23.5518	23.8232	23.2084	23.2856	23.4139	23.3637	23.555
MSMEG_5129	-0.13369	0.301962	22.1845	22.144	22.8749	22.7251	22.1939	22.3113	22.4993	22.393	22.3709	21.8794
MSMEG_5130	-0.220724	0.524043	20.094	20.9498	20.6155	20.4446	20.5139	19.7891	20.3344	20.6337	20.2693	20.4877
MSMEG_5224	0.224168	1.09614	22.1651	22.4437	22.5036	22.4376	22.6718	22.6044	22.809	22.8502	22.4231	22.656
MSMEG_5225	-0.266621	0.981667	25.3821	25.8489	25.3186	25.4229	25.5287	25.0422	25.2225	25.2546	25.0124	25.6363
MSMEG_5328	-0.0546318	0.12751	27.3053	27.419	27.1221	26.8249	27.222	26.981	26.9293	27.3465	26.8573	27.5061
MSMEG_5412	0.00704765	0.0140401	29.8426	29.7083	29.6509	29.0499	29.5352	29.7482	29.3255	29.6575	29.305	29.786
MSMEG_5413	-0.234922	0.768904	21.5682	21.6178	21.8495	21.6426	21.1855	21.4553	21.6553	21.4087	21.1343	21.0353
MSMEG_5428	-0.257856	1.17714	25.024	25.0942	24.5506	24.8285	24.9278	24.8468	24.6878	24.6374	24.3797	24.5842
MSMEG_5576	-0.28457	0.706047	21.1893	20.5328	21.4268	21.2545	21.6157	21.2528	20.7901	20.8297	20.8927	20.831
MSMEG_5590	-0.0515808	0.0773747	21.025	20.4992	21.44	21.1402	21.4356	20.5687	20.7734	21.5162	21.1873	21.2365
MSMEG_5593	-0.0737057	0.172951	21.0028	20.795	21.5521	21.1039	20.6951	21.0081	21.1857	20.9872	20.8685	20.7308
MSMEG_5642	-0.0960724	0.312905	21.675	21.7583	22.1163	21.9944	22.1223	21.9791	21.8289	21.9336	21.9678	21.4765
MSMEG_5662	-0.316272	1.36303	23.1696	23.2357	22.622	22.7111	23.0532	22.5735	22.54	22.5903	22.7337	22.7728
MSMEG_5675	-0.0354618	0.0717753	22.9121	23.0894	23.5395	23.1504	23.1322	23.2677	23.2093	23.4079	23.1976	22.5639
MSMEG_5695	-0.0357306	0.0891875	21.2386	20.8477	21.5236	21.3125	21.0617	21.2663	20.9401	21.1674	21.2707	NaN
MSMEG_5717	0.265786	0.956067	24.0599	23.778	24.1483	24.3952	24.4306	24.7003	24.1897	24.2935	24.4933	24.4642
MSMEG_5790	0.0211052	0.0613387	29.3764	29.7552	29.1449	29.3811	29.2113	29.4357	29.3786	29.3661	29.2011	29.5927
MSMEG_5796	-0.0918072	0.442973	23.2035	23.2933	23.1722	23.2933	23.3416	23.4833	23.1359	23.2213	22.9778	23.0265
MSMEG_5834	-0.0161201	0.0564073	24.1771	24.3448	23.8896	24.2153	24.1469	24.3102	24.1017	24.0723	24.2768	23.9321
MSMEG_5866	0.147603	0.334204	21.6561	21.813	22.4267	22.2386	22.3451	21.9179	22.0696	22.5679	22.2534	22.4088
MSMEG_5884	-0.232941	1.00155	22.2933	22.3252	21.8606	22.037	22.4843	21.9562	21.9572	21.9602	21.8002	22.1618
MSMEG_5890	-0.383465	0.786566	27.3618	27.815	27.0695	27.3146	27.5657	26.807	27.3318	26.8215	26.519	27.7299
MSMEG_5903	-0.251171	2.03774	22.4928	22.561	22.2585	22.57	22.4665	22.2756	22.3473	22.2421	22.1487	22.0792
MSMEG_5999	-0.078545	0.257211	22.4986	22.1678	22.1573	22.5214	22.2594	22.5644	22.3029	22.1925	22.2003	21.9516
MSMEG_6038	-0.277589	0.597674	20.1462	20.1463	20.6621	20.6016	20.3709	19.7734	20.3419	20.7628	19.7161	19.9451
MSMEG_6041	-0.315092	1.09505	20.5609	20.5406	21.0211	20.874	20.9328	20.1953	20.6668	20.6793	20.3416	NaN
MSMEG_6073	-0.219316	0.479353	21.7614	22.2345	21.6353	21.6046	22.3148	21.7247	22.0272	21.3042	21.4016	21.9964
MSMEG_6076	-0.287959	0.584937	23.1206	24.2106	23.6023	23.5592	23.722	22.8671	23.5575	23.435	23.1318	23.7834
MSMEG_6127	0.227483	1.06328	26.3302	26.2999	25.8524	26.0099	26.1622	26.5958	26.36	26.1824	26.2263	26.4276
MSMEG_6193	-0.169524	0.48908	22.9653	22.4744	22.577	22.4991	22.241	22.3469	22.015	22.3386	22.665	22.5437
MSMEG_6215	-0.201554	1.16896	21.0891	21.0609	21.3696	21.2882	21.094	21.0984	20.9881	21.1567	20.9018	20.7489
MSMEG_6235	0.471213	1.95935	22.4756	22.2872	22.6149	22.9413	23.0146	23.2091	23.0822	23.0138	23.2086	23.1758
MSMEG_6352	-0.144752	0.635001	23.8806	23.7705	24.1344	23.9345	23.9638	23.852	23.8396	24.0138	23.8151	23.4397
MSMEG_6354	-0.0626999	0.0980485	24.5142	24.5861	23.9023	24.1471	24.7315	24.0449	24.0879	24.2091	24.1993	25.0266
MSMEG_6407	-0.423597	1.09837	24.297	24.3399	23.5017	23.707	24.1176	23.4633	23.6321	23.4448	23.2681	24.0369
MSMEG_6427	0.493138	1.48032	27.2112	27.0962	27.9984	27.1734	27.3297	28.2235	27.6444	27.8928	27.7663	27.7475
MSMEG_6595	-0.180205	0.900942	22.4769	22.5317	22.3575	22.1875	22.3425	22.1859	21.9697	22.4318	22.3517	22.056
MSMEG_6601	-0.20106	0.435608	23.0487	23.1397	23.0231	23.0207	22.4342	22.7636	23.056	23.0946	22.5579	22.1889
MSMEG_6605	-0.0525593	0.142498	20.7514	21.126	21.1889	21.348	21.4245	20.8709	21.08	21.1197	21.3725	21.133
MSMEG_6630	0.0290829	0.0702441	24.404	24.9186	24.4326	24.6566	24.3149	24.8656	24.6336	24.5517	24.5942	24.2271
MSMEG_6636	0.359635	0.533232	23.7891	24.7608	25.59	24.4092	24.6731	24.6413	25.002	25.4576	25.0083	24.9111
MSMEG_6747	-0.397332	0.769821	21.4538	21.81	21.5563	20.9718	20.8793	21.049	21.1464	21.4449	20.2975	20.7467
MSMEG_6761	-0.0207592	0.0299691	21.9391	23.0065	22.0908	22.5655	21.9827	21.9889	22.574	22.2138	22.6058	22.0983
MSMEG_6874	-0.149971	0.969127	NaN	20.7464	20.8671	20.8797	20.677	20.7079	20.4329	20.7809	20.7031	20.5881
MSMEG_6900	-0.212992	0.641431	20.9177	20.8526	20.4131	20.2731	20.7582	20.2942	20.4396	20.3255	NaN	20.6605
MSMEG_6934	-0.202755	0.799537	26.4002	26.6132	26.2391	26.0922	26.2529	26.3407	26.0397	26.167	25.7871	26.2493
MSMEG_0020	-0.385639	0.917375	23.0487	22.8972	22.7922	23.2284	22.4395	22.0825	22.5411	22.8192	22.9405	22.0945
MSMEG_0033	0.00336914	0.0120915	20.8635	20.7102	20.7377	20.6303	21.0236	20.9904	20.8193	20.586	20.8321	20.7543
MSMEG_0078	-0.350798	0.920421	21.4182	21.1415	20.6371	20.7294	21.2029	20.7199	20.6091	20.4754	20.3948	21.1758
MSMEG_0087	-0.256838	0.410176	22.7488	22.5246	21.925	21.4604	21.8079	22.2662	21.9128	21.8016	21.3174	21.8846
MSMEG_0095	-0.0470909	0.124669	22.4361	22.8302	23.1112	23.0436	22.911	22.7588	22.8232	22.9836	22.9812	22.5499
MSMEG_0187	-0.201926	0.600535	22.4656	22.2736	22.2671	22.5627	22.334	22.5988	22.0518	21.9847	22.4683	21.7898
MSMEG_0194	-0.18565	0.467248	26.597	27.0513	26.1133	26.3686	26.1342	26.1404	26.414	26.3112	26.1169	26.3537
MSMEG_0238	-0.0669434	0.149877	23.2999	23.1698	23.7883	23.6289	23.6341	23.0018	23.8055	23.4255	23.4654	23.4881
MSMEG_0301	0.0155197	0.0255148	21.6939	21.5558	22.1016	21.885	21.42	21.9228	21.6738	22.1149	21.9052	21.1171
MSMEG_0366	-0.0587555	0.141744	22.8767	23.2638	23.0229	22.9446	23.4029	22.8423	23.0153	22.9348	22.8979	23.5268
MSMEG_0369	-0.071833	0.403411	21.9854	21.8871	22.0265	21.9733	21.8398	21.8112	21.8056	22.09	21.9712	21.675
MSMEG_0636	0.199176	0.832241	24.3767	24.4486	24.426	24.5245	24.0501	24.5865	24.4081	24.3519	24.5919	24.8833
MSMEG_0670	0.000178528	0.000275148	20.4848	20.7662	21.4094	20.7594	21.3429	20.9206	20.5488	21.306	20.9385	21.0497
MSMEG_0711	-0.206808	0.705743	22.3799	22.2562	21.8946	21.787	21.9016	21.8422	21.8303	21.7586	21.5981	22.1562
MSMEG_0754	-0.0213528	0.0789961	25.59	25.8147	25.4497	25.6134	25.9602	25.6877	25.671	25.512	25.7104	25.7402
MSMEG_0825	-0.064291	0.230661	24.3173	24.2691	24.7286	24.6264	24.4114	24.6037	24.3844	24.4603	24.4188	24.1643
MSMEG_0858	-0.408775	1.93213	21.9763	21.732	21.3056	21.4092	21.5139	21.2621	21.0918	21.2423	21.0884	21.2086
MSMEG_0867	0.0705094	0.283784	21.3281	21.4671	21.7642	21.6699	NaN	21.6585	21.537	21.6785	21.6374	NaN
MSMEG_0918	-0.293575	0.852474	23.3314	24.1548	23.2465	23.7098	23.5626	23.1108	23.5524	23.2114	23.2404	23.4221
MSMEG_0948	-0.0776272	0.309142	22.7795	22.3619	22.8754	22.7612	22.4109	22.5511	22.5669	22.5445	22.4943	22.6438
MSMEG_1098	0.0201735	0.0587695	NaN	19.9841	20.1836	20.3688	19.9734	20.1778	19.9292	20.1933	20.2903	NaN
MSMEG_1215	-0.153539	0.454589	22.0979	21.9298	21.7464	22.0312	21.9629	22.2512	21.7765	21.5982	21.9521	21.4225
MSMEG_1296	0.0329967	0.098154	21.9159	21.8014	22.2445	21.9025	NaN	22.0486	21.951	22.2263	22.035	21.7344
MSMEG_1334	-0.172702	0.709113	22.9918	23.0262	23.1946	22.9299	23.1145	23.0252	22.8105	23.0995	22.9897	22.4686
MSMEG_1374	-0.362656	0.419118	21.7442	21.4966	21.851	22.7381	22.7572	21.7024	20.7878	21.6244	22.1653	22.4939
MSMEG_1376	-0.0736904	0.103803	22.3448	22.0111	22.096	21.8305	21.4063	22.4234	21.8986	22.1762	21.6165	21.2056
MSMEG_1417	-0.0351044	0.107245	22.0857	21.7472	21.7039	21.9544	21.959	22.1908	21.8116	21.7809	21.9075	21.5839
MSMEG_1423	-0.248479	0.370095	22.2794	21.8246	21.5548	21.4971	22.5914	21.9184	22.2706	21.1201	21.3408	21.8551
MSMEG_1435	-0.456752	1.35032	27.8721	27.5333	27.0451	27.1409	27.6197	27.1823	26.9514	26.7682	26.7163	27.3091
MSMEG_1445	-0.142241	0.285282	26.9423	27.1217	26.636	26.9104	27.1458	26.9932	27.0553	26.4529	26.2744	27.2693
MSMEG_1485	-0.34896	1.38017	22.6829	22.461	22.196	22.3141	22.705	22.0569	22.0658	22.0394	21.9268	22.5252
MSMEG_1642	-0.343989	1.45956	22.7836	22.6099	22.0535	22.1868	22.3991	22.104	21.9796	22.0996	22.0518	22.0781
MSMEG_1680	-0.00790901	0.0101186	24.5444	25.3328	25.811	25.4301	25.5957	24.7491	25.3964	25.3693	25.4965	25.6633
MSMEG_1701	-0.0345146	0.169677	24.7311	24.8389	24.9896	24.5692	24.8822	24.7931	24.6996	24.7979	24.6771	24.8707
MSMEG_1703	-0.13317	0.611787	21.927	22.1878	22.3962	22.1137	22.263	22.1721	21.8665	22.1252	22.1836	21.8746
MSMEG_1822	0.0985188	0.411369	23.2597	23.3106	23.0967	22.9704	23.1709	23.4581	23.2378	23.0653	23.0671	23.4726
MSMEG_1824	0.128604	0.333229	21.8166	21.9439	21.2232	21.1987	21.4059	21.7278	21.551	21.6613	21.4557	21.8356
MSMEG_1834	-0.071159	0.325073	21.2281	21.1548	21.0228	20.9686	20.7963	20.8415	21.0523	21.1341	20.8498	20.9372
MSMEG_1884	-0.106588	0.385035	24.0718	24.0315	23.4972	23.8627	24.0352	23.8956	23.9313	23.582	23.7855	23.771
MSMEG_1946	-0.255183	1.33068	22.381	22.3258	22.6379	22.5182	22.4924	21.9158	22.3833	22.2242	22.4366	22.1195
MSMEG_1977	-0.0150112	0.0244942	20.5845	21.2779	21.4968	21.0495	21.1746	21.0511	20.954	20.9034	20.9185	21.6813
MSMEG_2027	0.309733	0.494427	24.8273	24.7393	24.3062	24.3062	23.5355	25.0571	24.883	24.8794	24.3308	24.1129
MSMEG_2111	-0.198052	0.699089	26.0579	25.7851	25.557	25.4613	25.7334	25.8704	25.4093	25.3973	25.3344	25.5931
MSMEG_2119	-0.330226	1.50386	21.8527	21.5523	21.4197	21.6638	21.758	21.6699	21.0444	21.2634	21.2647	21.3529
MSMEG_2122	-0.279886	0.919214	22.0026	22.2875	21.6681	21.7438	21.8186	21.5896	21.4214	21.5854	21.4531	22.0717
MSMEG_2123	0.395169	2.79555	21.941	21.8304	22.1849	22.1199	22.1527	22.6187	22.4072	22.4464	22.4191	22.3134
MSMEG_2163	-0.0838631	0.134793	21.9943	21.1482	22.3088	22.0776	22.0309	22.2036	21.5215	21.9445	21.9273	21.5435
MSMEG_2261	-0.197763	0.758125	20.8767	21.1242	21.2514	21.1589	21.483	20.9767	20.6905	21.0536	20.9416	21.243
MSMEG_2382	-0.237711	2.2546	24.3744	24.4541	24.335	24.4322	24.3115	24.2093	24.3239	24.1054	24.0917	23.9883
MSMEG_2426	0.139125	0.657413	24.6673	24.6266	24.744	24.797	24.5829	25.1096	24.7403	24.6804	24.9882	24.595
MSMEG_2436	-0.00934181	0.0162238	26.4469	26.0416	25.9064	25.9583	25.7884	26.3478	25.9461	25.6542	25.7054	26.4412
MSMEG_2451	0.0269894	0.0687178	22.8623	22.7925	23.379	23.0269	23.3158	23.0066	23.0095	23.3703	23.1867	22.9383
MSMEG_2539	-0.218484	0.463906	21.7348	21.4665	20.9399	21.0501	21.5499	21.5955	20.8386	20.9211	20.8852	21.4084
MSMEG_2540	-0.249976	0.722986	23.5211	23.4881	24.1848	24.0388	24.1064	23.3185	23.7996	23.7861	23.6362	23.549
MSMEG_2622	-0.246329	1.01513	23.9599	24.0612	23.4248	23.7811	23.4959	23.6095	23.4492	23.3998	23.5685	23.4643
MSMEG_2654	0.175689	0.557488	27.374	27.1332	26.8454	27.0805	27.2363	27.0139	27.4607	27.0969	27.2879	27.6885
MSMEG_2669	0.0502575	0.219509	24.7388	25.1468	25.0124	25.1054	24.8895	25.1227	25.0395	25.0879	25.0807	24.8131
MSMEG_2763	0.151508	0.301958	25.0893	25.549	25.0416	24.7729	24.8076	24.9986	25.1568	25.2729	24.8134	25.7763
MSMEG_2784	-0.0722668	0.150451	25.8546	26.0351	25.5901	25.9693	26.0049	26.3751	25.5269	25.511	26.023	25.6566
MSMEG_2786	-0.155825	0.801102	20.8566	21.029	20.8252	20.8425	21.1113	20.6426	20.754	20.6912	20.7012	21.0964
MSMEG_2787	-0.292365	1.46993	21.1623	21.3084	21.2114	21.3032	21.2295	21.2614	21.0179	20.6863	21.0791	20.7083
MSMEG_2940	-0.354351	1.46568	25.2956	25.477	25.1455	25.0088	25.4735	24.9719	24.9882	25.0146	24.5229	25.131
MSMEG_2974	-0.177328	0.371771	26.4531	26.2104	25.6834	25.5894	25.9675	25.6372	25.5735	25.7417	25.73	26.3346
MSMEG_3050	-0.377087	1.09666	29.8312	30.016	29.5626	29.7881	30.0587	29.2319	29.8435	29.4154	29.0221	29.8582
MSMEG_3059	0.371099	0.850892	24.5094	24.5156	24.5582	23.9257	23.5879	24.9289	24.7659	24.4425	24.5222	24.2931
MSMEG_3081	-0.231326	0.848105	22.6482	22.675	22.1955	22.2031	22.3735	21.8963	22.4529	22.0566	22.2948	22.2381
MSMEG_3138	-0.223243	1.29357	25.9683	26.0112	25.5782	25.6234	25.8738	25.7207	25.543	25.5576	25.4923	25.6249
MSMEG_3201	-0.204236	1.263	23.4687	23.1387	23.3935	23.2076	23.538	23.2988	23.0784	23.1605	23.1804	23.0073
MSMEG_3240	-0.225713	0.486461	22.8018	22.9133	22.0556	22.1045	22.5985	22.2359	22.2886	22.1491	21.9606	22.711
MSMEG_3261	0.00210762	0.0048133	22.2853	22.5787	22.2837	22.5905	22.1966	22.5871	22.5511	22.4457	22.4514	21.9101
MSMEG_3309	0.310732	1.16301	22.6668	22.7763	23.2716	23.0063	22.7767	23.1961	23.4816	23.2938	23.2187	22.8612
MSMEG_3492	-0.126257	0.430251	21.0435	21.3451	21.4805	21.5474	21.4922	21.4015	21.3602	21.2497	21.386	20.8801
MSMEG_3512	-0.294518	0.831671	21.6702	22.0422	22.1667	22.0813	21.9973	21.1881	22.1248	21.9277	21.7299	21.5146
MSMEG_3608	-0.0253792	0.0789503	21.4032	21.3448	21.6135	21.5138	21.3647	21.5961	21.3095	21.568	21.582	21.0576
MSMEG_3609	-0.0268539	0.0458266	20.9511	20.9116	21.7982	21.3195	21.5208	21.1408	21.1629	21.677	21.3922	20.994
MSMEG_3618	-0.176828	0.818566	27.3844	27.2017	27.0353	26.8726	27.2207	27.0847	26.936	26.8102	26.8338	27.166
MSMEG_3621	-0.159999	0.723388	22.975	22.7822	22.553	22.6414	22.8	22.51	22.5121	22.6313	22.8966	22.4016
MSMEG_3706	-0.270238	0.529918	NaN	19.7002	20.1169	20.197	20.0084	20.0854	19.6785	19.9214	19.9806	19.011
MSMEG_3771	-0.312923	1.50844	22.9482	23.1382	22.4678	22.7055	22.8837	22.664	22.465	22.4968	22.4605	22.4925
MSMEG_3773	-0.0779934	0.298114	23.7439	23.7369	23.5946	23.6144	23.497	23.8303	23.573	23.2507	23.7044	23.4383
MSMEG_3888	0.00260849	0.00568488	21.7014	21.2943	22.0425	21.8393	21.836	21.7589	21.7559	22.073	21.5472	21.5916
MSMEG_4268	-0.137917	0.584604	23.3206	23.2575	23.2532	23.1913	23.384	23.0085	22.947	23.1862	23.5498	23.0256
MSMEG_4302	-0.307476	0.461042	20.6476	20.9896	21.5541	20.7646	20.512	20.3794	20.2927	21.3298	20.9671	19.9617
MSMEG_4381	0.126937	0.237299	20.9608	20.6917	21.4934	21.6776	21.4371	21.219	21.634	21.3584	21.6563	21.0274
MSMEG_4476	-0.235465	0.938875	25.8181	25.936	25.2877	25.4665	25.5804	25.5409	25.4501	25.2394	25.225	25.456
MSMEG_4483	-0.170041	0.430466	21.8387	21.9073	22.1994	22.1762	22.0458	21.4245	22.0114	22.3377	21.9791	21.5644
MSMEG_4497	-0.292847	0.772544	22.3525	21.9205	21.4177	21.5207	21.7763	21.8113	21.2964	21.2964	21.4639	21.6555
MSMEG_4530	-0.332064	0.921296	21.5162	21.2891	20.9757	20.6242	20.632	20.4623	20.6285	20.6382	20.7624	20.8853
MSMEG_4632	-0.139649	0.610132	21.1722	21.0836	20.677	20.9644	20.8132	20.8916	21.0005	20.6781	20.7984	20.6438
MSMEG_4672	-0.163147	0.805938	24.5362	24.3825	24.0759	24.1021	24.3097	24.1174	23.9395	24.1187	24.3056	24.1095
MSMEG_4688	-0.13835	0.280964	24.5571	24.1934	25.1206	24.4936	24.487	24.7335	24.2686	24.7648	24.3752	24.0178
MSMEG_4692	-0.23097	0.544068	27.0566	27.1238	26.5262	26.5823	27.1747	26.6179	26.1987	26.5744	26.8486	27.0692
MSMEG_4753	-0.325461	1.59779	24.8391	24.8037	24.3386	24.443	24.5012	24.4011	24.0665	24.1658	24.2871	24.3778
MSMEG_4826	-0.00740585	0.0134325	20.6537	20.7903	21.3642	21.1235	20.7286	21.034	20.9606	21.2317	20.9582	20.4389
MSMEG_4832	-0.353155	1.21535	21.258	21.3544	21.7579	21.6319	21.5423	21.3975	21.0381	21.5126	21.0647	20.7658
MSMEG_4890	-0.201713	0.184023	26.8758	26.8445	27.1407	27.5024	27.2438	25.2565	27.3652	27.3391	27.4001	27.2378
MSMEG_4908	-0.0827518	0.259387	23.5906	24.1602	23.507	23.8014	23.572	23.5482	23.5723	23.8676	23.6463	23.5831
MSMEG_4935	0.0545643	0.277824	25.3881	25.1933	25.3986	25.477	25.5373	25.4422	25.5856	25.4985	25.5033	25.2374
MSMEG_4971	0.0610085	0.315096	23.6388	23.6857	23.526	23.7322	23.5645	23.8494	23.5829	23.5643	23.8922	23.5635
MSMEG_4999	-0.196115	0.889775	21.2141	21.0465	20.9621	20.977	21.2266	20.9083	20.5318	21.0321	21.1206	20.8529
MSMEG_5042	-0.326226	0.831006	21.6737	21.825	20.7935	21.3931	21.4869	21.4809	20.8841	20.9923	21.094	21.0898
MSMEG_5064	-0.246316	0.34486	21.1682	22.2013	22.6586	22.2512	22.3876	21.2032	22.0191	22.1673	21.8638	22.1818
MSMEG_5073	-0.205176	0.43077	22.4852	23.2791	23.5851	23.0342	22.985	22.5078	22.9256	23.2374	22.8893	22.7825
MSMEG_5078	0.0497433	0.0899362	22.1567	21.5805	22.4044	22.3854	22.364	22.5305	22.1491	22.4711	22.1885	21.8005
MSMEG_5086	-0.328141	1.84026	22.4751	22.2218	22.2073	22.072	21.9687	21.9315	21.682	21.8748	22.0413	21.7746
MSMEG_5119	0.216159	0.612217	20.0426	19.8194	20.4506	20.5579	20.5693	20.2481	20.4733	20.726	20.6244	20.4489
MSMEG_5122	-0.247669	0.614448	29.6189	29.793	29.0154	29.2047	29.4274	29.1107	29.2474	28.9734	28.8422	29.6476
MSMEG_5156	-0.176867	0.738329	21.8335	21.9843	21.7553	21.8538	22.0933	21.4847	22.027	21.7935	21.4903	21.8404
MSMEG_5414	-0.306709	2.0819	23.4611	23.621	23.3373	23.4574	23.5128	23.4275	23.1337	23.083	22.9845	23.2274
MSMEG_5426	-0.125325	0.236567	23.0841	22.96	22.0616	22.6486	22.7252	22.4814	22.6463	22.2694	22.4408	23.015
MSMEG_5478	-0.0404041	0.0572611	21.5285	20.6699	21.0515	21.2371	21.4075	20.9927	21.0128	20.7696	20.9918	21.9257
MSMEG_5485	0.169464	0.765953	24.1647	23.7819	23.8686	24.1651	24.1281	24.4413	24.0199	24.1961	24.2626	24.0357
MSMEG_5635	-0.375326	0.598996	26.6633	26.9901	26.3122	26.2651	26.7214	26.1406	26.4108	25.8056	25.5757	27.1428
MSMEG_5680	1.07304	4.30987	25.185	25.6808	25.334	25.6273	25.1629	26.4447	26.5089	26.2144	26.7281	26.4592
MSMEG_5706	-0.21637	0.675674	22.0531	21.9833	21.3185	21.4198	21.4757	21.3577	21.3617	21.3822	21.589	21.4778
MSMEG_5726	0.108376	0.25979	21.89	22.1748	22.7793	22.0609	22.3079	22.3779	22.1028	22.5871	22.2205	22.4667
MSMEG_5837	-0.25372	1.38732	27.1736	27.5058	26.8797	27.115	27.1556	26.8986	26.849	26.9038	27.0232	26.8865
MSMEG_5871	-0.122628	0.486938	25.6349	25.425	25.6187	25.791	25.703	25.8219	25.3558	25.5327	25.6049	25.2442
MSMEG_6098	-0.257449	0.794997	21.8826	22.2566	22.0758	22.1525	21.8165	21.6916	22.1386	22.023	21.7329	21.3106
MSMEG_6129	-0.146905	0.887081	23.793	23.8723	23.6611	23.9223	24.086	23.7569	23.7148	23.5262	23.7894	23.8129
MSMEG_6208	0.0596439	0.233342	21.5191	21.3194	21.7496	21.5769	21.4677	21.5978	21.8382	21.5293	21.6091	21.3563
MSMEG_6212	0.506854	0.65701	22.7621	22.8383	23.3426	23.1542	24.0868	23.1804	23.3983	23.8622	23.4251	24.8524
MSMEG_6284	-0.268977	2.71494	22.9566	22.9961	22.9665	22.9288	22.8127	22.7334	22.5631	22.6605	22.8116	22.5472
MSMEG_6329	0.516163	1.69346	23.1617	23.453	23.4297	23.8973	23.16	23.891	24.1455	23.9301	24.1876	23.5283
MSMEG_6414	-0.490928	1.87586	21.2063	21.0818	20.6397	20.5636	21.0401	20.4848	20.2177	20.4254	20.2473	20.7016
MSMEG_6439	-0.173653	0.729998	25.665	25.7464	25.2816	25.4302	25.4453	25.6614	25.2029	25.3625	25.2678	25.2055
MSMEG_6584	-0.321032	1.06107	22.3638	22.095	22.438	22.7393	22.8293	22.1571	22.0656	21.9599	22.1419	22.5357
MSMEG_6894	-0.209407	0.471877	27.2654	27.4992	26.8617	26.8208	27.4204	26.7501	27.1013	26.9048	26.6033	27.4609
MSMEG_6907	0.0894726	0.511563	24.3687	24.2293	24.5414	24.4392	24.5804	24.6136	24.3372	24.5844	24.6029	24.4681
MSMEG_0002	0.489198	1.72496	23.517	23.5676	24.028	24.0585	23.4807	24.0663	24.3096	24.4553	24.3811	23.8856
MSMEG_0076	0.182188	0.544169	24.9723	25.0619	24.4801	24.8147	24.6343	25.1423	24.9242	24.5782	24.9537	25.2761
MSMEG_0224	0.0687847	0.268542	22.6941	22.7026	23.0205	22.8205	22.6847	22.8065	23.1061	22.9314	22.8438	22.5785
MSMEG_0252	-0.0413132	0.159511	22.4277	22.5029	22.2469	22.1096	22.0654	22.3122	22.0944	22.257	22.3632	22.1191
MSMEG_0309	-0.314761	1.63741	21.8773	22.0226	21.9441	21.953	21.8229	22.0311	21.4617	21.5432	21.5427	21.4675
MSMEG_0457	-0.163573	0.653184	22.1378	22.0465	21.7928	21.7687	21.4915	21.7302	21.5665	21.5831	21.7208	21.8189
MSMEG_0600	0.0838345	0.111708	20.6068	20.9355	21.8292	21.3463	20.8737	20.6768	21.2997	21.8085	21.1123	21.1134
MSMEG_0717	-0.0638451	0.0975478	21.5637	22.4853	22.4254	21.8802	21.5242	21.9532	22.1262	22.2424	21.6412	21.5967
MSMEG_0768	0.0408699	0.135378	25.1467	25.427	25.1013	25.413	25.191	25.4996	25.2443	25.2905	25.4668	24.982
MSMEG_0983	-0.310107	2.27925	21.8321	21.874	21.8097	21.7112	22.0092	21.3853	21.7231	21.4311	21.487	21.6593
MSMEG_1183	0.160032	0.387443	21.4279	21.1506	21.8318	21.4684	21.5266	21.9411	21.6214	21.6837	21.8641	21.0953
MSMEG_1437	0.0316761	0.0552305	26.5004	26.621	26.1255	26.2822	26.2453	26.3673	26.5696	25.9094	26.118	26.9684
MSMEG_1467	-0.167461	0.569573	24.9955	24.5878	24.4668	24.2971	24.618	24.4592	24.1316	24.4144	24.6232	24.4995
MSMEG_1469	0.0794754	0.197551	24.2055	23.872	23.9691	23.8585	23.9055	23.7139	23.928	23.8302	24.1977	24.5384
MSMEG_1559	-0.356858	1.45368	22.6565	22.6699	22.399	22.2121	22.0008	22.0733	22.2047	21.8515	22.0064	22.0182
MSMEG_1676	0.0855991	0.237118	22.8267	22.541	23.2788	22.8982	23.0131	23.167	23.0357	23.1361	22.9634	22.6837
MSMEG_1679	-0.176234	0.757712	23.4516	23.3231	23.2518	23.3549	23.7963	23.3488	23.1695	23.0538	23.2693	23.455
MSMEG_1804	-0.108055	0.563792	24.2561	24.0962	24.0515	24.1569	24.4697	24.2185	24.0299	23.9657	24.0424	24.2337
MSMEG_1926	0.0096138	0.0266521	22.4355	22.437	22.9496	22.7806	22.8318	22.5814	22.6854	22.8992	22.7797	22.5368
MSMEG_1934	-0.2281	1.1705	27.7574	27.877	27.3079	27.5665	27.7902	27.5291	27.4022	27.4485	27.3102	27.4686
MSMEG_1950	0.0876072	0.181562	27.01	27.4186	26.8374	27.3051	27.6512	27.2429	27.2484	27.1396	27.2071	27.8223
MSMEG_1996	0.136548	0.288285	22.7687	23.2027	23.8984	23.1423	23.2207	23.2887	23.4102	23.6947	23.2528	23.2693
MSMEG_2033	0.0531345	0.123655	24.057	24.1862	24.3515	24.359	23.9254	24.4478	24.2365	24.5027	24.2429	23.7148
MSMEG_2072	-0.138255	0.651403	22.1061	21.7576	21.9872	22.1407	22.2196	21.7162	21.9407	21.9594	22.1028	21.8007
MSMEG_2074	0.0612656	0.155904	22.5223	22.2508	22.6969	22.856	22.4634	22.8046	22.5849	22.6784	22.823	22.2047
MSMEG_2079	-0.102846	0.548801	23.7921	23.7697	23.5849	23.9037	23.7377	23.8619	23.5877	23.6442	23.7491	23.431
MSMEG_2118	-0.167447	0.454143	22.2827	22.1927	22.7818	22.3847	22.7439	22.6594	22.0683	22.2001	22.5213	22.0994
MSMEG_2207	0.127068	0.703068	21.2766	21.0922	21.1331	21.2147	21.0364	21.4477	21.1253	21.2716	21.4656	21.0782
MSMEG_2249	-0.00655556	0.0132913	21.8683	21.757	22.3488	22.2247	22.0093	22.0296	21.9566	22.4586	22.0683	21.6623
MSMEG_2263	-0.196339	0.574532	20.5865	20.9168	21.3973	21.2729	21.2438	20.7083	20.8074	21.1419	20.8579	20.9199
MSMEG_2393	-0.0263805	0.085213	22.3197	22.2941	22.4283	22.4588	22.2695	22.5037	22.197	22.3211	22.6081	22.0085
MSMEG_2394	0.337318	0.978184	22.725	22.8372	23.5281	23.1442	22.6921	23.394	23.3348	23.5701	23.3376	22.9767
MSMEG_2414	-0.0516575	0.241636	23.7137	23.8482	24.0689	24.0867	24.1219	24.0298	23.9406	23.8573	23.9389	23.8145
MSMEG_2440	-0.303692	0.844882	26.3648	26.5779	25.7296	25.8871	26.0504	25.7426	25.915	25.5469	25.7223	26.1646
MSMEG_2613	-0.121307	0.237745	22.2847	22.5178	22.7717	22.2818	22.227	22.0913	22.5327	22.5037	22.6738	21.6748
MSMEG_2746	-0.204689	1.1288	23.0013	23.0512	23.1055	22.9126	23.1352	22.8304	22.5679	23.1368	22.8746	22.7724
MSMEG_2752	-0.322122	0.92276	23.6622	23.3949	23.1598	23.0425	23.5731	23.1693	22.5628	23.0137	23.037	23.4391
MSMEG_2780	-0.232593	0.614182	22.6428	22.6785	23.2628	22.7336	23.3745	22.3878	22.7295	22.9236	22.6083	22.8801
MSMEG_2999	0.110646	0.275348	21.4222	21.2442	22.0566	21.7311	21.5702	21.8643	21.5239	21.9861	21.7175	21.4856
MSMEG_3000	-0.0096817	0.0324164	23.6603	23.5322	23.5138	23.275	23.5881	23.5715	23.2711	23.3945	23.5347	23.749
MSMEG_3004	-0.227731	0.826863	26.2344	26.0164	25.7358	25.6651	26.0591	26.0174	25.4139	25.7043	25.7012	25.7352
MSMEG_3111	-0.0584087	0.286261	22.2491	22.1002	21.8718	22.1556	21.9924	22.0585	21.8626	21.9579	21.9975	22.2007
MSMEG_3124	0.00440559	0.0156652	23.7737	23.8587	23.5193	23.564	23.5323	23.5491	23.7112	23.4501	23.7882	23.7714
MSMEG_3188	-0.0673224	0.200325	20.7489	NaN	20.9553	21.1476	21.1481	21.1754	20.8129	20.9671	21.0579	20.65
MSMEG_3220	-0.149469	0.681266	22.0892	21.9485	21.9002	22.1574	22.0532	21.8444	21.5946	21.8471	22.2124	21.9026
MSMEG_3479	-0.238264	1.07522	30.244	30.2836	29.7874	29.8651	30.0173	29.9542	29.6884	29.7789	29.62	29.9644
MSMEG_3489	-0.064814	0.0963057	23.9079	24.0402	23.8479	23.7897	23.3838	24.2952	23.6968	23.7769	23.9389	22.9378
MSMEG_3505	-0.0782646	0.27482	22.032	22.0089	22.3095	22.2504	22.0525	21.9238	22.0675	22.3653	22.1455	21.7598
MSMEG_3564	0.0469437	0.0631996	25.2655	24.7825	25.353	25.3588	26.0997	25.0728	25.0618	25.6675	25.4016	25.8904
MSMEG_3595	-0.103181	0.565124	23.1385	23.3167	23.0205	23.4659	23.3446	23.1708	23.2267	23.0716	23.0615	23.2398
MSMEG_3770	-0.335028	0.939309	22.6891	22.4205	23.0495	22.0631	22.5404	22.0313	22.333	22.4714	22.3076	21.9443
MSMEG_3810	0.0348763	0.0853569	25.1731	25.176	24.77	24.7568	24.8949	25.4395	24.7748	24.881	24.8716	24.9783
MSMEG_3829	-0.0689857	0.244624	22.9605	23.2228	22.6771	22.8816	22.7924	23.1099	22.6904	22.7858	22.7946	22.8088
MSMEG_4193	-0.0957752	0.320107	23.9128	24.4098	24.0857	23.9643	23.8766	24.2268	23.8597	23.9678	24.0048	23.7111
MSMEG_4240	-0.0811134	0.493025	23.5906	23.3636	23.2367	23.2881	23.2217	23.1427	23.2828	23.2079	23.3299	23.3318
MSMEG_4256	-0.317691	1.16201	23.8799	24.116	23.4713	23.4839	23.6049	23.471	23.4039	23.3017	23.1405	23.6505
MSMEG_4272	-0.0950108	0.297077	28.1136	28.472	28.0259	27.8223	27.9056	28.2164	27.8739	27.9792	27.7642	28.0307
MSMEG_4299	-0.0851982	0.115923	23.7182	22.604	23.3188	23.4821	23.8655	23.8084	22.8238	23.1237	23.2902	23.5164
MSMEG_4313	0.12402	0.31512	27.8017	27.976	27.597	27.8426	27.6578	28.4469	27.6875	27.7384	28.0282	27.5943
MSMEG_4329	-0.456715	1.54856	23.5118	23.1985	23.1089	22.8808	22.832	22.6403	22.2948	22.8905	22.9278	22.495
MSMEG_4401	0.1551	0.906765	24.6207	24.5135	24.6566	24.9581	24.5207	24.8227	24.916	24.7032	24.8679	24.7353
MSMEG_4627	0.227479	0.692943	27.6845	27.7077	27.3694	28.086	27.8108	28.0709	28.0848	27.4982	28.1268	28.015
MSMEG_4671	-0.471356	1.23906	23.6328	23.5586	22.6561	22.9639	23.5001	22.9728	22.4652	22.724	22.9284	22.8643
MSMEG_4709	-0.264304	0.955335	23.2188	23.0886	22.7163	22.6827	22.757	22.904	22.8034	22.4622	22.3814	22.5908
MSMEG_4901	-0.179852	1.21808	23.2052	22.9262	22.8335	23.1286	23.0929	22.8247	22.8174	22.8021	23.0403	22.8027
MSMEG_4976	-0.228529	1.18565	26.0525	26.1157	25.7139	25.8062	25.9188	25.7558	25.6157	25.5563	25.5711	25.9656
MSMEG_5068	-0.169633	0.437275	22.8443	22.5802	22.0354	22.1434	22.0322	22.3314	22.013	22.167	22.2715	22.0045
MSMEG_5080	0.0650509	0.156625	22.304	22.5286	22.9986	22.9654	22.7599	22.6727	22.8562	23.0043	22.8761	22.4725
MSMEG_5258	0.105762	0.746933	24.8624	25.1721	24.9376	24.9351	25.1803	25.1585	25.2064	25.0418	25.1115	25.098
MSMEG_5261	0.0968338	0.502764	23.8313	23.558	23.4784	23.8004	23.5663	23.8673	23.6572	23.6601	23.8924	23.6415
MSMEG_5265	0.311159	1.42909	24.0457	23.6905	24.174	23.9783	23.7811	24.4264	24.0187	24.3775	24.3608	24.0419
MSMEG_5342	0.027227	0.0615683	25.2272	25.5095	25.3029	25.305	25.7833	25.1742	25.2674	25.455	25.4843	25.8831
MSMEG_5471	-0.119511	0.471827	23.3377	24.0122	23.6441	23.7084	23.7663	23.4516	23.5161	23.6172	23.7082	23.5781
MSMEG_5676	-0.29189	0.633449	22.5042	22.582	23.1924	22.765	22.5363	22.2175	22.8769	22.8768	22.0762	22.073
MSMEG_5727	-0.0557816	0.104815	22.4386	22.664	23.3286	22.9662	22.8651	22.8864	22.7452	23.0914	22.9359	22.3248
MSMEG_5892	-0.0396461	0.0713838	21.2871	21.1843	21.6628	21.1659	21.5951	21.66	21.104	21.7867	21.2825	20.8639
MSMEG_6021	-0.00357437	0.00630887	22.2846	22.1323	22.7876	22.9559	22.8934	22.77	22.2905	22.6026	22.8086	22.5641
MSMEG_6077	-0.272713	0.856058	26.253	26.1188	25.6476	25.701	26.1625	25.9012	25.7765	25.4362	25.457	25.9483
MSMEG_6282	0.0708939	0.133631	24.7351	24.8999	24.0681	24.5496	24.3994	24.6543	24.5619	24.1427	24.6051	25.0425
MSMEG_6289	-0.170127	0.579475	23.4198	23.6709	23.3322	23.1664	22.9347	23.3886	23.0391	23.1742	23.0586	23.0129
MSMEG_6412	-0.325866	1.5054	23.7222	23.8334	24.0595	23.755	23.6511	23.4712	23.7499	23.6336	23.3865	23.1508
MSMEG_6422	0.271275	0.421091	24.4336	24.3284	24.5727	24.5785	25.7451	24.7504	25.0011	25.003	24.7587	25.5014
MSMEG_6524	-0.0973381	0.279342	23.0052	22.9508	22.6228	23.2104	22.7926	22.6948	22.7589	22.6072	23.2303	22.8038
MSMEG_6585	-0.242846	0.634261	23.6985	23.0318	23.3594	23.5738	23.8121	23.5057	22.9615	22.9888	23.228	23.5775
MSMEG_6596	-0.200812	0.719039	22.4744	22.5454	22.942	22.4916	22.7392	22.3531	22.7535	22.6118	22.3258	22.1444
MSMEG_6754	-0.00611191	0.0139422	24.8433	24.8214	25.0802	25.1978	24.8853	25.1961	24.956	25.1275	25.0535	24.4644
MSMEG_6787	-0.144917	0.783129	24.2427	24.6038	24.25	24.5384	24.4895	24.3384	24.1196	24.317	24.4432	24.1817
MSMEG_6822	-0.0208832	0.0327716	22.9382	23.3701	23.1659	23.217	23.7544	23.1476	23.0786	22.8579	23.3647	23.8924
MSMEG_6896	0.0656502	0.229047	26.7388	27.3199	26.9661	27.2125	27.1054	27.0729	27.2197	27.1647	27.274	26.9398
MSMEG_6897	0.0221035	0.0965948	28.4331	28.5222	28.3378	28.3624	28.4886	28.3735	28.6151	28.3053	28.3038	28.657
MSMEG_0028	0.00709991	0.0135104	22.3092	21.9449	21.7625	21.3834	21.6604	21.9877	21.6859	21.6262	21.7075	22.0885
MSMEG_0146	0.0127605	0.0419962	23.6184	23.6072	23.4096	23.5188	23.5545	23.8794	23.6748	23.4275	23.3149	23.4757
MSMEG_0312	-0.0675999	0.144068	22.5414	23.1559	23.0498	22.9424	22.8505	22.5743	23.2821	23.0625	22.7767	22.5064
MSMEG_0365	0.0245224	0.0319197	21.9682	21.7753	21.2105	21.2557	22.0907	21.8538	21.661	21.1412	21.4562	22.3108
MSMEG_0441	-0.148254	0.672057	23.6465	23.2542	23.348	23.5012	23.1515	23.4148	23.0552	23.1175	23.3126	23.2601
MSMEG_0445	-0.302343	0.532782	23.3314	23.3169	24.0833	23.4114	23.2867	22.4358	23.3568	23.6488	23.5372	22.9395
MSMEG_0603	-0.595894	1.22703	21.3391	NaN	22.0902	21.9575	21.9987	20.942	20.7045	21.7264	21.2843	21.5952
MSMEG_0640	-0.261398	1.38061	23.4593	23.1535	23.0648	23.1909	23.2056	22.9799	22.6998	22.8232	23.1222	23.142
MSMEG_0766	0.370972	1.31995	23.3184	22.9683	23.7308	23.6078	23.641	23.8388	23.9139	23.7615	24.03	23.5768
MSMEG_0789	-0.203286	0.500089	23.7437	23.9141	23.7347	23.2733	23.1457	23.0042	23.5917	23.6342	23.3598	23.205
MSMEG_0859	0.141372	0.329057	24.5981	24.9101	24.6521	25.0882	24.4918	25.2027	24.744	24.6908	25.2872	24.5224
MSMEG_0953	-0.221542	1.19466	23.4615	23.3676	23.5588	23.4996	23.6033	23.4754	23.3612	23.4433	23.0947	23.0085
MSMEG_0954	-0.147813	0.380236	23.8151	23.936	23.1546	23.2991	23.465	23.3024	23.3737	23.1598	23.4046	23.6902
MSMEG_1133	0.0296642	0.0867049	21.5768	21.1207	21.6136	21.3582	21.3853	21.5589	21.4115	21.7118	21.311	21.2096
MSMEG_1242	0.193771	1.1625	23.3943	23.4239	23.4981	23.6827	23.4615	23.6708	23.7854	23.7158	23.8535	23.4041
MSMEG_1291	0.0657104	0.0922175	20.2926	20.1461	20.4022	20.4552	19.8914	20.4598	20.3656	20.8032	20.5077	19.3797
MSMEG_1399	0.399197	1.37732	26.6594	26.3819	26.1967	26.5953	26.3883	26.8186	26.8673	26.3331	27.0132	27.1855
MSMEG_1442	-0.0526131	0.0870461	24.5906	24.0802	23.9337	23.9456	24.0374	24.0101	23.7868	23.9116	24.7907	23.8253
MSMEG_1482	-0.12062	0.365637	23.116	23.0642	22.845	23.0536	22.8638	23.1566	23.082	22.9482	22.7422	22.4106
MSMEG_1498	-0.0524487	0.151511	23.8103	23.3248	23.6684	23.887	23.6674	23.9506	23.471	23.5256	23.6927	23.4558
MSMEG_1513	0.276071	2.19583	25.327	25.4974	25.506	25.5718	25.2995	25.8872	25.7517	25.5757	25.7267	25.6408
MSMEG_1675	0.0181664	0.0367602	21.5809	21.9391	22.0865	21.9819	21.7882	22.0118	21.9854	22.1229	22.0416	21.3057
MSMEG_1682	0.0514675	0.0738161	22.6946	23.3909	23.9272	23.5962	23.8738	23.284	23.652	23.9461	23.335	23.5229
MSMEG_1694	-0.121947	0.550685	24.7135	24.6723	24.4419	24.3352	24.2799	24.5007	24.4298	24.3449	24.1533	24.4044
MSMEG_1695	0.0265572	0.0533912	21.8535	21.7159	22.3054	22.131	21.7932	21.8548	21.8882	22.4933	21.6812	22.0143
MSMEG_1782	-0.0271526	0.0295522	22.6966	22.7107	23.6813	23.0873	23.938	22.8582	22.7471	23.8153	23.1361	23.4214
MSMEG_2073	-0.116944	0.343501	21.8871	21.6277	22.1933	22.0101	21.8992	22.1314	21.4736	21.8698	21.9354	21.6225
MSMEG_2081	-0.208857	0.462678	25.0707	24.2321	24.3505	24.1031	24.4316	24.5624	23.8514	24.0664	24.3088	24.3547
MSMEG_2189	0.0896168	0.130639	21.8088	21.6907	22.2214	22.0765	21.6095	22.4019	22.1017	22.2178	22.0683	21.0652
MSMEG_2360	-0.186995	0.531411	22.4716	22.5578	23.1099	22.6185	22.6275	22.3988	22.7274	22.8025	22.3986	22.1231
MSMEG_2379	0.179269	0.7626	24.6029	24.684	25.1314	24.8419	24.8709	25.0438	24.9238	25.2176	25.0852	24.7569
MSMEG_2516	0.00905762	0.0202035	22.4654	22.3066	22.8682	22.3678	22.579	22.7599	22.4773	22.8139	22.4072	22.174
MSMEG_2766	-0.362297	1.39352	25.1496	25.202	24.5605	24.7077	24.948	24.652	24.5441	24.441	24.3246	24.7947
MSMEG_2773	-0.107801	0.158111	21.5392	21.8012	22.4397	22.0455	21.8569	22.0552	22.1667	22.2275	21.6373	21.0568
MSMEG_3034	-0.0580437	0.260875	22.7712	22.8263	23.0702	23.0921	22.9044	22.9632	22.8184	23.0396	22.9021	22.6507
MSMEG_3184	0.0819172	0.125357	21.8837	22.1828	23.2114	22.2447	22.3203	22.3588	22.2469	22.8511	22.318	22.4778
MSMEG_3246	0.0176559	0.0952964	24.0493	24.0661	24.008	24.1989	24.3711	24.1422	24.1981	24.1025	24.1532	24.1857
MSMEG_3280	-0.210721	0.692734	21.3398	21.8904	22.0232	21.683	21.7545	21.1949	21.6631	21.6523	21.7187	21.4085
MSMEG_3430	-0.249108	0.980388	22.3225	22.5304	22.7354	22.7168	22.5734	22.3992	22.5252	22.4414	22.3851	21.8821
MSMEG_3636	-0.0560467	0.15605	23.4043	23.6082	23.372	23.3017	23.2493	23.3339	23.1919	23.572	23.618	22.9396
MSMEG_3758	-0.0144905	0.0597023	22.8111	22.6231	22.8524	22.6356	22.8502	22.8844	22.8671	22.8039	22.574	22.5706
MSMEG_3776	-0.0220284	0.0547132	23.9922	23.8884	24.2322	24.3055	23.9581	24.3207	24.0776	24.133	24.1224	23.6126
MSMEG_3808	-0.109837	0.367691	21.2084	21.087	20.7997	20.945	21.3061	20.953	20.913	20.6469	21.0496	21.2344
MSMEG_4167	-0.0777786	0.258712	21.4541	21.1968	21.5575	21.8646	21.5782	21.4057	21.264	21.4192	21.6413	21.5322
MSMEG_4307	0.0138245	0.0345176	22.5313	22.5025	22.8757	22.8059	22.3398	22.8323	22.4226	22.814	22.6889	22.3666
MSMEG_4325	-0.107404	0.37219	27.089	27.6875	26.9655	27.0974	27.163	27.0752	27.1267	27.0374	27.1548	27.0713
MSMEG_4584	-0.491422	2.90843	23.3102	23.1913	23.153	22.9642	23.0777	22.6288	22.7959	22.8731	22.4477	22.4938
MSMEG_4589	-0.0508881	0.0794054	21.2663	21.5308	21.8999	21.6621	21.4598	21.5879	21.6026	21.8417	21.8244	20.7078
MSMEG_4645	-0.262145	1.23446	23.4206	23.1528	22.9958	22.8627	23.0759	22.8332	22.6397	22.7707	23.0915	22.8619
MSMEG_4921	-0.146216	0.399162	27.5603	28.0896	27.1701	27.7805	27.6596	27.493	27.5985	27.3103	27.6978	27.4293
MSMEG_4957	-0.261675	1.03844	23.6158	23.5989	23.6292	23.2711	23.4129	23.1488	23.0923	23.2921	23.674	23.0124
MSMEG_5248	-0.094128	0.399051	25.3124	25.3308	25.4569	25.2451	25.7488	25.1129	25.4394	25.381	25.3741	25.3159
MSMEG_5725	0.0133434	0.026296	22.9306	23.0717	23.6665	23.3606	23.3817	23.4406	23.0027	23.6269	23.3629	23.0447
MSMEG_5912	-0.502394	1.57661	22.4871	22.0633	22.234	21.5152	22.1297	21.5089	21.3271	21.719	21.5	21.8625
MSMEG_5925	-0.031683	0.0360395	23.5787	24.0605	24.4176	24.3376	23.6343	24.112	24.0607	24.5732	24.0906	23.0339
MSMEG_5940	-0.0415649	0.136588	25.0911	24.864	25.0423	25.1812	25.0461	25.2782	24.9667	24.9807	25.1373	24.6541
MSMEG_6037	-0.114694	0.298771	22.6674	22.3102	22.9768	22.9103	22.9359	22.773	22.5036	22.8466	22.805	22.2988
MSMEG_6082	0.0271309	0.0884541	24.3566	24.3639	24.0439	24.2463	24.1362	24.0896	24.5516	24.0246	24.3401	24.2766
MSMEG_6105	-0.178172	0.49934	23.3952	22.8068	22.4111	22.771	22.7561	22.5382	22.6025	22.7504	22.7925	22.5657
MSMEG_6213	0.0611732	0.0497208	22.3444	22.271	23.4598	22.7203	23.9423	22.7757	22.157	23.8165	22.8295	23.465
MSMEG_6257	0.0816772	0.252999	24.1174	24.1058	23.8986	23.8825	23.567	24.1921	23.9641	23.9544	24.1684	23.7007
MSMEG_6321	-0.201659	0.879576	20.1345	NaN	20.5131	20.346	20.6337	NaN	20.1029	20.2809	20.2598	20.1769
MSMEG_6425	-0.131842	0.448734	25.4631	25.4215	25.0982	24.9023	25.2368	25.2339	24.9388	25.1187	24.8597	25.3115
MSMEG_6431	0.068441	0.224842	27.4111	27.3192	27.1702	27.5402	27.112	27.5592	27.615	27.2221	27.1101	27.3884
MSMEG_6515	0.0210602	0.0399445	22.484	22.266	22.8933	22.8928	23.0213	22.8257	22.5215	23.0397	22.8684	22.4074
MSMEG_6602	-0.185186	0.440083	23.4265	22.7497	23.486	23.2928	23.5492	23.4689	22.7146	23.0051	23.2697	23.12
MSMEG_6638	-0.544195	0.524519	23.6912	22.5765	21.2697	22.4726	22.5227	22.5271	22.0663	20.8913	22.5521	21.775
MSMEG_6752	-0.0155712	0.0368249	24.5749	24.9068	24.5296	24.5038	24.6539	25.0236	24.2541	24.4707	24.7287	24.6142
MSMEG_6772	0.170198	0.559463	23.0089	22.6735	23.1689	23.1285	23.0519	23.4302	22.7455	23.1688	23.2996	23.2386
MSMEG_0024	0.023288	0.103683	30.0729	30.1298	29.7956	29.8706	29.9841	30.103	29.8296	29.9044	30.0124	30.12
MSMEG_0067	-0.165453	0.272157	23.7309	23.4271	23.0485	23.1621	23.9225	23.108	23.2086	22.9491	23.1488	24.0493
MSMEG_0131	-0.267212	0.684847	24.1636	23.5748	24.2815	24.4644	24.4938	24.1602	23.6544	23.8754	24.1563	23.7958
MSMEG_0314	-0.157372	0.206549	23.4319	23.1291	23.8625	22.8452	22.7035	23.4347	23.5025	23.2524	22.553	22.4426
MSMEG_0422	0.339683	2.09339	23.0418	23.0771	23.3566	23.3919	23.2984	23.4225	23.5918	23.4338	23.7511	23.6649
MSMEG_0703	-0.318504	1.12661	23.8527	24.0077	23.5082	23.3652	23.544	23.2085	23.4016	23.5165	23.0123	23.5465
MSMEG_0791	-0.008041	0.0179058	21.2461	21.4163	22.0189	21.6878	21.2941	21.6572	21.6494	21.3883	21.4361	21.492
MSMEG_0793	-0.111482	0.498854	25.6187	25.1403	25.211	25.2827	25.2217	25.3816	25.2508	25.1399	25.0149	25.1299
MSMEG_0877	-0.0309212	0.238567	23.9482	24.015	23.8088	24.0032	23.9682	23.9723	23.9038	23.8796	24.0278	23.8054
MSMEG_0919	-0.248501	0.635542	28.248	28.5347	27.7118	28.2028	28.2701	27.9562	28.0725	27.5897	27.7269	28.3797
MSMEG_1090	0.0524845	0.151271	22.5113	22.7253	22.7983	22.9432	22.9804	23.0793	22.8362	22.8327	23.0005	22.472
MSMEG_1345	-0.222124	1.5734	26.85	26.8469	26.5948	26.6693	26.74	26.7558	26.4502	26.5392	26.3724	26.4725
MSMEG_1365	0.154785	0.398218	30.9743	31.2496	31.0329	31.3003	31.6318	31.3124	31.5213	31.0699	31.2379	31.8215
MSMEG_1387	0.121526	0.270468	22.2528	22.2473	23.0969	22.7348	22.8201	22.7999	22.7608	22.9435	22.8328	22.4224
MSMEG_1424	-0.114618	0.291585	24.2996	23.9423	23.6721	23.577	23.9526	23.809	23.8585	23.4419	23.6636	24.0975
MSMEG_1444	-0.268189	0.654862	28.5486	28.4812	27.8105	28.1304	28.3504	28.0877	28.1941	27.7154	27.5839	28.3991
MSMEG_1470	-0.0216965	0.0469489	26.9788	27.0349	26.4818	26.4943	26.8489	26.5705	26.772	26.4939	26.7493	27.1444
MSMEG_1472	0.249966	0.369637	27.0082	26.6846	25.7783	26.4116	26.4443	26.7041	26.9874	25.9857	26.5965	27.303
MSMEG_1512	0.0427402	0.107256	23.0357	23.0414	23.662	23.4723	23.5399	23.3142	23.2185	23.5676	23.5548	23.3099
MSMEG_1521	-0.171267	0.488486	27.9874	27.8628	27.4389	27.8393	28.0328	27.8458	27.9905	27.4549	27.3067	27.7069
MSMEG_1523	-0.0016304	0.00400131	26.5516	26.1344	26.0346	26.1837	26.0765	26.3774	26.1066	25.927	26.4804	26.0811
MSMEG_1548	-0.257671	0.345524	25.2122	25.3417	24.1348	24.6308	25.3769	24.6462	24.8129	23.977	24.6341	25.3377
MSMEG_1557	-0.290146	0.776602	28.243	27.9265	27.2737	27.5626	27.7246	27.4822	27.4743	27.1893	27.3475	27.7864
MSMEG_1657	-0.0744022	0.513861	24.6788	24.5744	24.8001	24.4543	24.6459	24.665	24.4855	24.6149	24.5413	24.4746
MSMEG_1825	-0.209399	1.27683	24.2837	24.6275	24.2302	24.2481	24.1289	24.2163	24.112	24.0721	24.0756	23.9953
MSMEG_1951	-0.157755	0.22937	26.7136	27.0169	26.3744	27.0673	27.5716	26.355	26.8143	26.5514	26.7141	27.5202
MSMEG_1959	-0.305628	0.840354	22.6184	22.3777	22.1757	21.7355	22.218	21.591	21.7111	21.9803	22.2706	22.0441
MSMEG_2388	-0.13666	0.411844	25.2077	25.1124	25.7629	25.3708	25.3685	25.1026	25.2602	25.5617	25.2536	24.9609
MSMEG_2395	-0.176858	1.39927	22.5191	22.1882	22.2738	22.4722	22.2436	22.2664	22.1584	22.1788	22.11	22.099
MSMEG_2408	-0.117807	0.816958	25.759	25.9343	26.0067	25.8409	25.7514	25.6077	25.832	25.888	25.7522	25.6235
MSMEG_2410	-0.141947	0.369712	24.6349	24.2388	23.8156	23.8528	24.1275	24.1219	23.7414	23.8645	24.0609	24.1711
MSMEG_2416	-0.0974377	0.194357	23.5234	24.4466	24.006	24.0728	24.1389	23.7574	23.9272	23.7852	23.7712	24.4595
MSMEG_2468	0.0267574	0.0829936	22.8578	22.5652	22.9176	22.9772	22.7304	23.0703	22.7957	23.0099	22.7423	22.5639
MSMEG_2497	0.116518	0.366434	21.6026	22.0882	21.82	22.045	21.4965	22.1516	21.8295	21.9911	21.967	21.6956
MSMEG_2578	-0.293635	1.15366	23.7129	23.8279	23.243	23.2836	23.4247	23.3926	23.3416	23.0033	23.0387	23.2478
MSMEG_2593	-0.301749	2.07755	22.6652	22.666	22.8422	22.7259	22.6988	22.2948	22.4289	22.7061	22.2419	22.4178
MSMEG_2641	-0.0302204	0.113634	24.9877	24.8982	25.19	25.0846	25.1473	25.0832	25.1628	25.0999	25.1131	24.6976
MSMEG_2664	0.162221	0.584878	23.8991	23.8004	24.4611	24.1602	23.953	24.1761	24.0351	24.4346	24.2014	24.2377
MSMEG_2684	-0.0611557	0.269082	24.7101	24.8177	24.6423	24.4949	24.5569	24.8321	24.5177	24.5521	24.6444	24.3698
MSMEG_2740	-0.375517	1.21128	23.8131	24.1238	23.47	23.518	23.9304	23.32	23.4189	23.407	23.0393	23.7923
MSMEG_2782	-0.0296581	0.109332	24.658	24.9024	24.8926	25.0225	25.114	24.669	25.0344	24.84	25.0154	24.8825
MSMEG_2900	-0.12143	0.333693	23.2549	23.0876	23.6951	23.4564	23.4472	23.4238	23.1271	23.5259	23.3917	22.8657
MSMEG_2941	-0.137239	0.701998	25.0278	25.0439	24.8874	25.2275	25.2907	25.0895	24.7773	24.831	25.0906	25.0028
MSMEG_3043	-0.0908909	0.351795	22.9753	22.8278	23.1814	23.1016	23.1876	23.1305	22.6343	23.0829	23.0588	22.9128
MSMEG_3047	-0.254107	1.48991	22.6814	22.6794	22.4718	22.275	22.6258	22.0956	22.3137	22.4666	22.3274	22.2596
MSMEG_3099	0.0464512	0.153696	25.9436	26.0992	25.4757	25.8641	25.84	26.0781	25.8046	25.7584	25.942	25.8717
MSMEG_3123	-0.126981	0.429016	24.3889	24.0586	23.8007	23.7762	23.7645	23.8989	23.793	23.7433	23.6938	24.0249
MSMEG_3186	-0.0158089	0.0252702	22.012	21.8772	22.5091	22.3018	22.1785	22.4878	22.0797	22.5938	22.0988	21.5395
MSMEG_3205	0.159448	0.595045	23.133	23.4156	23.7393	23.6662	23.3448	23.6504	23.7296	23.6362	23.7243	23.3556
MSMEG_3594	0.0637646	0.150389	23.4171	23.0011	23.4711	23.5466	23.2505	23.5391	23.4225	23.6495	23.5002	22.8939
MSMEG_3598	-0.319744	0.887993	24.8681	24.9084	24.8334	24.0545	24.4309	24.184	24.3176	24.5149	24.0135	24.4666
MSMEG_3599	-0.24482	0.610354	27.1416	26.9361	26.7251	26.233	26.516	26.804	26.3835	26.5806	26.1124	26.4471
MSMEG_3620	-0.163548	0.646721	25.638	25.5245	25.9917	25.8674	26.0068	25.6862	25.5575	25.6395	25.9027	25.4248
MSMEG_3625	-0.0529938	0.103331	24.0175	24.3773	24.4752	24.4989	24.0106	24.2545	24.5332	24.4174	24.2804	23.6289
MSMEG_3740	-0.235824	1.06403	23.7882	23.8462	23.4077	23.3625	23.6481	23.3366	23.439	23.3966	23.1356	23.5658
MSMEG_3741	0.00083847	0.00303517	23.2065	22.9677	23.0087	23.2985	23.0735	23.2823	23.1833	23.1668	23.0511	22.8756
MSMEG_3772	-0.00428581	0.012553	24.2772	24.072	24.527	24.3947	24.324	24.3721	24.4573	24.4611	24.3054	23.9775
MSMEG_3839	-0.0328136	0.0848215	21.5566	21.7407	21.08	21.1201	21.3762	21.3575	21.1155	21.3417	21.3818	21.513
MSMEG_3894	-0.0831699	0.370541	25.5797	25.363	25.5712	25.7126	25.6019	25.6484	25.4256	25.4107	25.683	25.245
MSMEG_4664	-0.161383	0.417567	22.1888	21.8967	22.1435	22.4951	22.6191	22.4918	21.7534	22.0847	22.1314	22.0749
MSMEG_4686	-0.401712	1.59022	24.1996	24.0428	23.5613	23.5304	23.9679	23.5062	23.4259	23.4005	23.2988	23.662
MSMEG_4755	0.00184708	0.00465549	24.0254	23.7778	24.1994	24.1367	24.249	24.2493	24.0934	24.1933	24.1881	23.6735
MSMEG_4911	0.0036335	0.00705471	23.2551	23.0484	23.71	23.3797	23.3826	23.5419	23.1761	23.6797	23.4768	22.9194
MSMEG_4985	0.102089	0.440705	25.9324	25.6122	25.9469	26.0232	26.0923	25.9713	26.0275	25.8295	26.0499	26.2391
MSMEG_5114	-0.0143131	0.0355641	22.6499	22.4516	22.7492	22.3557	22.3595	22.7218	22.8101	22.4404	22.3114	22.2105
MSMEG_5276	0.0402115	0.112018	22.8595	22.7524	23.049	23.2798	22.8249	23.0147	23.1166	22.8462	23.2623	22.7269
MSMEG_5368	-0.305889	1.21713	24.2255	23.8426	23.6713	24.061	24.0206	23.7301	23.3641	23.4811	23.9241	23.792
MSMEG_5658	0.220271	0.768434	22.7315	22.9104	23.4279	23.268	23.2372	23.4661	23.0673	23.4424	23.3789	23.3217
MSMEG_5734	0.042831	0.115303	24.4784	24.4285	24.9349	24.6958	24.388	24.7084	24.4954	24.9142	24.6642	24.3575
MSMEG_5830	0.0430183	0.0742026	23.2942	23.5701	24.3425	23.989	24.0147	23.5978	24.0091	24.1138	24.0187	23.6862
MSMEG_5852	0.100224	0.21749	25.0672	25.3334	25.7241	25.7183	25.0972	25.6108	25.4851	25.6413	25.6755	25.0285
MSMEG_6337	-0.346149	1.47239	23.194	22.9185	23.5447	23.0522	23.225	22.8246	22.8565	23.1379	22.774	22.6107
MSMEG_6365	-0.236393	1.14905	27.5733	27.8556	27.2312	27.5871	27.4925	27.3787	27.4337	27.2935	27.3338	27.1179
MSMEG_6398	-0.0712196	0.198778	27.0361	26.7032	27.2565	26.8949	26.8616	27.2154	26.8825	27.0046	26.672	26.6217
MSMEG_6520	-0.223613	1.19491	25.0553	24.7609	24.7522	24.7441	24.7809	24.7721	24.8021	24.5881	24.4196	24.3933
MSMEG_6740	-0.137859	0.549905	23.2911	22.7962	23.3283	23.2202	23.4135	23.1556	22.8975	23.0633	23.1915	23.0521
MSMEG_6938	-0.305039	1.13288	24.908	24.6649	24.1874	24.443	24.5917	24.2983	24.125	24.1688	24.1004	24.5773
MSMEG_6941	0.306484	1.59987	26.7433	26.3779	26.4355	26.7277	26.7321	26.9291	26.8516	26.8954	27.1738	26.699
MSMEG_0102	0.285866	0.741478	22.4573	21.7322	22.6057	22.392	21.9422	22.6049	22.7766	22.5859	22.4284	22.1629
MSMEG_0127	0.011483	0.0431932	24.3017	24.4444	24.3328	24.4561	24.1853	24.5021	24.4052	24.3941	24.4282	24.048
MSMEG_0158	-0.0965553	0.394222	23.1671	22.7211	23.2015	23.1472	23.2174	23.2089	22.8642	22.9682	22.9528	22.9774
MSMEG_0216	0.0974274	0.475698	26.9899	27.0127	26.9144	27.0477	26.9347	27.3382	27.0309	26.7941	27.0247	27.1986
MSMEG_0373	-0.252966	1.00008	23.3609	22.9727	23.1563	22.972	23.4892	23.1584	22.6532	22.8851	22.9039	23.0858
MSMEG_0930	0.0641193	0.155425	23.6739	23.1587	23.9482	23.6585	23.8085	23.5545	23.6152	23.9561	23.8978	23.545
MSMEG_1165	-0.173523	0.609095	27.1586	27.3391	26.7031	26.8541	26.9062	26.8904	26.9013	26.6596	26.6102	27.0319
MSMEG_1436	-0.2362	0.970161	26.2256	25.9126	25.8034	25.7216	25.831	25.6881	25.9925	25.4514	25.4851	25.6961
MSMEG_1546	-0.169614	0.202528	26.5051	26.6375	25.3984	26.2459	26.6366	26.4014	26.3155	25.1923	26.1039	26.5624
MSMEG_1582	0.299654	0.851356	31.7235	31.6895	31.008	31.3669	31.3973	31.8376	31.7268	31.4495	31.5001	32.1694
MSMEG_1634	0.246926	0.704475	26.283	26.0643	25.7603	25.8621	25.5266	26.2646	26.208	25.7901	25.9861	26.4821
MSMEG_1635	-0.0670071	0.191099	24.4927	24.4796	24.9587	24.7703	25.1157	24.8097	24.8047	24.6353	24.4891	24.7431
MSMEG_1651	0.0444267	0.0825401	23.7446	23.4471	23.5412	23.7302	23.3648	24.1399	23.7097	23.542	23.6502	23.0082
MSMEG_1762	0.0148972	0.032766	22.3403	21.9354	22.3502	22.5892	22.5688	22.6878	22.1775	22.5368	22.3232	22.1331
MSMEG_2026	-0.123994	0.501116	24.9821	24.8224	24.5315	24.5109	24.7842	24.5838	24.5491	24.5511	24.4487	24.8785
MSMEG_2070	0.132366	0.390713	22.9752	23.0208	23.4279	23.5043	23.1456	23.4738	23.2939	23.4306	23.5767	22.9607
MSMEG_2078	-0.00739975	0.0152497	25.5518	25.4742	25.9718	25.9061	25.5011	25.8179	25.6407	26.0134	25.6522	25.2436
MSMEG_2381	-0.109122	0.192881	25.4909	24.8833	24.9849	24.6424	24.946	25.3127	24.257	25.0885	24.7922	24.9517
MSMEG_2415	0.0679531	0.0970621	25.459	25.5851	25.79	25.9391	26.6613	25.7563	25.6829	25.9121	25.8879	26.5351
MSMEG_2421	-0.0295742	0.0718409	24.4534	24.5073	24.5638	24.7593	24.4335	24.9599	24.4245	24.4728	24.5976	24.1146
MSMEG_2624	-0.0846725	0.424477	24.7645	25.0592	24.7372	24.7278	24.6497	24.8276	24.5574	24.8442	24.6384	24.6475
MSMEG_2976	-0.420404	2.50785	23.996	23.984	23.6902	23.5352	23.7122	23.2455	23.3863	23.5101	23.2883	23.3853
MSMEG_3030	-0.102813	0.640653	23.5259	23.4076	23.3084	23.2297	23.295	23.3506	23.0975	23.2967	23.1207	23.3871
MSMEG_3125	-0.0492577	0.140914	24.0492	23.8597	24.4917	24.2483	24.2167	24.2326	24.0825	24.2915	24.1905	23.8222
MSMEG_3221	-0.370374	1.17363	25.5529	25.2494	24.717	24.7568	25.082	24.9589	24.6805	24.5775	24.5126	24.7768
MSMEG_3647	0.0086731	0.0183449	28.3682	28.7227	28.0088	27.9496	28.0196	28.2068	28.2243	28.229	28.0108	28.4414
MSMEG_3739	-0.34352	1.64759	25.2122	25.4031	25.0261	24.8991	24.8787	24.853	24.8042	24.7684	24.4642	24.8119
MSMEG_3775	-0.149451	0.494076	25.5941	25.8538	25.3214	25.5011	25.3025	25.7154	25.2874	25.3564	25.3575	25.1088
MSMEG_3811	-0.274144	0.604182	29.7611	30.384	29.3262	29.5026	29.5008	29.2585	29.7299	29.4297	29.0712	29.6148
MSMEG_4112	-0.207903	0.496655	21.7117	22.1897	22.5348	22.3382	22.056	21.6098	22.0435	22.2881	22.1893	21.66
MSMEG_4180	0.023093	0.0908331	24.1641	24.2203	24.5014	24.1004	24.4946	24.2202	24.2331	24.4107	24.3985	24.3337
MSMEG_4232	0.0549339	0.0979364	21.6033	22.4468	22.4097	22.3462	21.8841	22.096	22.3229	22.0655	22.5959	21.8845
MSMEG_4296	-0.0753059	0.320441	22.4061	22.7164	22.4646	22.5488	22.7911	22.4043	22.3223	22.4972	22.7065	22.6203
MSMEG_4298	0.275946	0.201111	27.6451	29.7484	29.7448	29.5285	28.1535	28.8009	29.7588	29.8648	29.5977	28.1777
MSMEG_4684	0.479868	1.92371	25.3131	25.3191	25.0106	25.5882	24.9555	25.8892	25.5716	25.4763	25.968	25.6807
MSMEG_4722	-0.252891	1.00879	24.1911	24.1356	23.5785	23.613	23.8212	23.5751	23.6885	23.4616	23.6787	23.6711
MSMEG_4917	-0.0553841	0.263265	25.0416	25.1587	24.6883	24.9546	24.9283	24.9013	24.8832	24.7588	25.0021	24.9492
MSMEG_5061	-0.359982	2.10593	23.3484	23.1046	22.9577	22.9629	23.0771	22.6454	22.6394	22.6068	22.7511	23.008
MSMEG_5103	-0.127286	0.37659	22.6081	22.3412	22.7694	22.7649	22.4461	22.4931	22.6258	22.6143	22.5849	21.9752
MSMEG_5639	-0.0916435	0.246285	24.0922	23.771	23.8061	23.5503	23.8066	23.8468	23.4134	23.5628	24.139	23.6059
MSMEG_5684	0.108872	0.302729	24.7668	24.8635	25.4477	25.257	25.059	25.2666	25.0968	25.4096	25.2736	24.8917
MSMEG_5795	-0.0413319	0.102905	22.7396	22.8552	23.3949	23.277	23.0974	23.1006	23.0002	23.2006	23.1355	22.7205
MSMEG_5828	-0.019928	0.0634384	23.4082	23.5523	23.8054	23.8756	23.5563	23.7086	23.6024	23.6775	23.7585	23.3511
MSMEG_5873	-0.0768661	0.203548	23.4158	23.441	23.3088	23.2628	23.741	23.2777	22.9948	23.3639	23.3645	23.7843
MSMEG_5943	-0.163638	0.728829	24.2831	24.5262	24.2321	24.5081	24.2143	24.428	24.202	24.1427	24.2907	23.882
MSMEG_6094	-0.194933	0.516324	23.4404	23.2331	23.957	23.4756	23.8127	23.7099	23.3397	23.6038	23.0607	23.2301
MSMEG_6241	-0.135942	0.138417	25.2208	24.3823	23.8659	24.3473	25.357	24.7357	24.3894	23.6526	24.555	25.1608
MSMEG_6285	-0.125816	0.26054	22.754	23.1592	22.4032	22.1393	22.4449	22.1345	22.3992	22.5679	22.4325	22.7374
MSMEG_6363	-0.0876797	0.196307	23.2819	23.2058	23.8049	23.6311	23.4765	23.4876	23.3943	23.7041	23.5074	22.8685
MSMEG_6413	-0.0829952	0.295629	23.8187	23.687	24.0332	23.9494	23.9938	24.0662	23.8323	23.935	23.7706	23.463
MSMEG_6514	-0.0851254	0.281827	23.9335	23.74	24.2592	24.0064	23.9528	23.9412	23.9947	24.1723	23.7162	23.6417
MSMEG_6565	0.0834171	0.349903	24.6628	24.9012	25.1107	24.9732	25.145	24.8679	25.1622	25.1632	25.0665	24.9501
MSMEG_0108	0.187946	0.757759	23.7211	23.7767	24.3153	24.0871	23.8896	24.2277	24.1069	24.3496	24.0115	24.0337
MSMEG_0239	-0.134206	0.260423	24.0575	24.2793	25.1061	24.5446	24.4883	24.3275	24.2921	24.7283	24.4839	23.9729
MSMEG_0250	-0.372546	1.09445	23.8725	23.7146	23.1547	23.1029	23.3177	23.1221	23.3597	22.9271	22.7406	23.1501
MSMEG_0313	-0.264337	0.399416	23.2925	22.8996	22.846	22.1026	22.2868	22.976	22.7253	22.4565	21.8793	22.0688
MSMEG_0317	-0.0133949	0.0515358	22.7517	22.5097	22.4458	22.4112	22.4338	22.3649	22.4351	22.6379	22.6809	22.3666
MSMEG_0536	-0.0721359	0.11676	26.3217	26.3824	26.4154	26.2072	27.0093	26.2501	25.9123	26.6427	26.1974	26.9729
MSMEG_0702	0.0457638	0.127766	26.5513	26.4276	26.7363	26.8098	26.6161	26.831	26.7029	26.8369	26.7877	26.2115
MSMEG_0913	0.0741913	0.119822	24.3988	23.9799	24.1933	24.0306	24.362	24.2755	23.8515	24.1993	25.0783	23.9309
MSMEG_0940	-0.22992	0.651609	24.6369	24.42	23.9456	23.9292	24.3526	24.0074	23.8672	24.037	23.8107	24.4125
MSMEG_1364	-0.448325	1.23961	29.5707	29.6759	28.9114	29.2004	29.5999	28.9299	29.0792	28.6692	28.6382	29.4002
MSMEG_1821	-0.142677	1.14579	25.1221	25.1199	25.3748	25.1802	25.2282	25.0732	25.1823	25.1123	25.0643	24.8798
MSMEG_1914	0.0751534	0.451523	24.9309	24.9654	25.0838	25.1568	25.2909	25.2443	25.161	25.1691	25.2136	25.0157
MSMEG_1930	-0.0419846	0.0788002	23.1158	22.9897	22.7993	22.7204	22.6547	22.7076	23.2208	22.2587	22.7324	23.1506
MSMEG_2435	-0.325178	0.7585	27.6576	27.8234	27.2327	27.0214	27.5733	27.0569	27.2285	26.9822	26.72	27.6948
MSMEG_2519	-0.286401	1.44528	27.2083	27.1454	26.7806	26.8067	27.0525	26.5845	26.6317	26.6294	26.7283	26.9876
MSMEG_2750	-0.12383	0.832532	25.9419	25.8376	25.6285	25.8469	26.0323	25.8614	25.7017	25.652	25.6804	25.7725
MSMEG_3019	-0.0449688	0.119601	23.4328	23.3562	23.798	23.5857	23.8327	23.5635	23.3569	23.7982	23.7776	23.2843
MSMEG_3044	-0.111884	0.704588	24.0571	24.2859	23.9754	24.1116	23.9409	24.096	23.9098	23.9341	24.0579	23.8137
MSMEG_3095	-0.446533	1.24368	23.7123	23.2731	22.807	23.2318	23.4514	23.1371	22.542	22.6123	22.7505	23.2011
MSMEG_3106	-0.15351	0.607416	26.0974	26.5176	26.195	26.3664	26.0732	26.1618	26.2309	26.2234	26.1165	25.7494
MSMEG_3147	-0.0658009	0.0906518	22.7139	22.9048	22.8039	22.6584	22.8879	22.2234	22.4603	22.6151	23.7407	22.6004
MSMEG_3150	-0.373895	1.78615	25.0675	24.5878	24.3799	24.4449	24.5719	24.2722	24.2736	24.2547	24.2475	24.1345
MSMEG_3209	-0.285673	1.34583	26.1022	26.1052	25.742	25.5836	25.8446	25.736	25.5203	25.5877	25.3898	25.7154
MSMEG_3465	0.133425	0.172908	23.1038	23.4016	23.9229	23.5792	22.7727	23.541	23.563	23.9849	23.7341	22.6243
MSMEG_3605	-0.177673	0.306793	25.4053	24.9143	25.4155	24.7522	24.8857	25.427	25.0265	25.1883	24.4255	24.4172
MSMEG_3641	-0.23555	0.976133	23.3995	23.3251	22.7455	22.8823	23.0507	22.8621	22.7633	22.8929	22.7821	22.925
MSMEG_3753	-0.0989285	0.245712	24.435	25.073	24.1887	24.4536	24.302	24.5026	24.5056	24.4585	24.3127	24.1784
MSMEG_3778	-0.15114	1.54645	24.4124	24.4772	24.4631	24.4648	24.3817	24.4026	24.3316	24.3864	24.1803	24.1426
MSMEG_3895	-0.0363335	0.0893871	25.8185	25.5501	25.8911	26.0603	25.7682	26.0594	25.711	25.7974	25.986	25.3527
MSMEG_3902	-0.147088	0.573798	24.1936	24.0701	24.1645	24.0659	24.1449	24.0255	23.7023	24.0687	24.3639	23.7431
MSMEG_4210	-0.297909	0.39398	22.1068	22.8918	21.9928	21.5031	22.7112	21.5058	22.3837	21.6703	21.569	22.5873
MSMEG_5121	-0.250418	0.893654	24.3127	24.4262	24.9873	24.6361	24.7604	24.3024	24.2386	24.6744	24.4495	24.2057
MSMEG_5182	-0.160859	0.882465	23.1068	22.8729	23.2755	23.2545	23.0762	22.9713	23.0843	22.9678	23.0354	22.7228
MSMEG_5184	-0.0884197	0.149638	23.4423	23.7616	24.2671	24.0261	23.811	24.0403	23.755	24.1234	23.8531	23.0942
MSMEG_5197	-0.148672	0.400246	24.6158	24.548	25.2622	25.1607	25.1055	24.8679	24.6472	25.0324	24.7857	24.6158
MSMEG_5250	-0.0967564	0.381142	23.572	23.5132	23.8275	23.7617	23.9606	23.5755	23.4882	23.8283	23.7972	23.4619
MSMEG_5263	-0.0827759	0.249721	29.0664	29.0602	28.6133	28.7539	28.8885	29.1368	28.4768	28.7681	28.8311	28.7556
MSMEG_5404	-0.201376	0.615328	24.2112	24.2321	23.7097	23.8454	23.871	23.8369	24.1987	23.5002	23.6109	23.7157
MSMEG_5486	-0.348425	1.25565	26.8497	26.8216	26.2925	26.2697	26.288	26.1735	26.2454	26.2362	25.8557	26.2686
MSMEG_5520	-0.104597	0.272726	22.7861	22.6253	23.1103	22.9373	23.3875	23.0138	22.9587	23.0651	22.6391	22.6468
MSMEG_5937	0.216856	0.609618	24.0517	24.4924	25.0657	24.3572	24.3735	24.6207	24.7406	24.8502	24.5974	24.6158
MSMEG_6804	-0.213845	0.734241	24.9802	24.7474	24.3418	24.8093	24.8566	24.4249	24.3176	24.4383	24.5943	24.8911
MSMEG_0088	-0.119055	0.145637	23.8402	23.1318	22.8588	22.1967	22.8036	23.3442	22.7483	22.8064	22.3236	23.0134
MSMEG_0233	0.353555	1.8306	25.3192	25.6614	25.6518	25.707	25.637	26.2596	25.7395	25.8191	26.0145	25.9116
MSMEG_0361	-0.13741	0.711503	25.9117	26.1212	25.8001	25.6491	25.8594	25.8114	25.5119	25.7437	25.8529	25.7345
MSMEG_0550	-0.159656	0.958018	26.0166	26.3535	26.0243	25.991	26.1109	25.8523	25.7556	26.0701	26.0279	25.992
MSMEG_0912	-0.0637051	0.253914	26.029	25.8081	26.2029	26.202	26.0557	26.1076	25.9105	26.1454	26.0717	25.7439
MSMEG_0943	-0.038628	0.142197	25.0932	24.7779	25.1286	25.2692	25.2844	25.2258	25.0116	24.9691	25.1575	24.9962
MSMEG_0969	0.0466003	0.0944428	25.0347	25.1284	25.6428	25.4868	25.0976	25.4981	25.3445	25.6138	25.3504	24.8166
MSMEG_1075	-0.0126019	0.0312765	24.4165	24.3405	24.8142	24.6569	24.4298	24.5581	24.4709	24.7241	24.7137	24.1281
MSMEG_1347	-0.338033	0.840292	29.2449	29.1586	28.5727	28.6891	29.1353	28.5153	28.8829	28.37	28.2521	29.09
MSMEG_1476	-0.168986	0.566369	24.0625	23.6327	23.5664	23.2754	23.7458	23.5388	23.36	23.3116	23.5931	23.6343
MSMEG_1819	-0.0336838	0.0754538	24.9969	24.8874	25.3743	25.147	24.9985	25.2501	24.9259	25.3981	25.0661	24.5955
MSMEG_1836	-0.187685	0.775802	23.4561	23.405	23.8097	23.3074	23.4373	23.3487	23.4018	23.5404	23.1343	23.0519
MSMEG_1890	-0.140036	0.444312	24.2527	24.775	24.1637	24.477	24.1381	24.429	24.2595	24.2131	24.2709	23.9337
MSMEG_2080	-0.16886	0.401831	24.4486	23.6457	23.6757	23.6817	23.98	23.9388	23.389	23.5268	23.8226	23.9102
MSMEG_2362	-0.0502026	0.172282	23.3412	23.0806	22.8209	22.8447	22.9896	23.1903	22.8805	22.9021	23.0245	22.8287
MSMEG_2365	-0.154665	0.766165	25.78	26.0071	25.6906	25.7486	25.6573	25.8283	25.722	25.6587	25.5594	25.3418
MSMEG_2372	-0.0829685	0.264849	24.1277	24.1595	23.7771	23.6353	23.6947	23.7816	23.7111	23.7221	23.6953	24.0692
MSMEG_2387	-0.0125244	0.030277	24.9859	24.7231	25.1832	25.1109	24.642	25.0469	25.0792	25.0499	24.8348	24.5716
MSMEG_2449	-0.0651333	0.139857	23.9547	23.917	24.5226	24.3926	24.2093	24.2955	24.0132	24.418	24.2736	23.6703
MSMEG_2528	-0.307304	1.36611	24.0306	24.1055	23.8213	23.5921	23.6711	23.6959	23.238	23.5815	23.652	23.5167
MSMEG_2541	-0.122109	0.402604	27.7319	27.8023	27.1628	27.6954	27.5228	27.6795	27.5344	27.2329	27.4318	27.4261
MSMEG_2628	-0.245907	1.1972	25.3313	25.2651	24.8577	24.8141	25.1517	24.943	24.8173	24.7088	24.7927	24.9284
MSMEG_2685	-0.0588654	0.109499	24.0744	24.0996	24.5568	24.3606	24.1646	24.4992	24.095	24.5284	24.291	23.548
MSMEG_2937	0.0111858	0.0541691	25.5705	25.8607	25.9261	25.936	25.926	25.8016	25.8594	25.8458	25.94	25.8284
MSMEG_3058	-0.134969	0.547785	25.6248	25.2718	25.2643	25.381	25.5606	25.2876	24.9965	25.1907	25.4927	25.4602
MSMEG_3235	-0.173848	1.43955	26.6164	26.5641	26.3231	26.4177	26.4185	26.3049	26.1792	26.2923	26.4465	26.2478
MSMEG_3255	-0.391796	0.726935	25.607	25.3689	25.1235	25.228	26.1321	24.8753	24.6723	25.0646	25.0181	25.8703
MSMEG_3574	-0.0322247	0.0831942	22.8464	22.9394	23.3927	23.2156	23.1623	22.8928	23.1799	23.3535	23.1722	22.7968
MSMEG_3746	-0.171955	0.703489	23.1825	22.9554	23.2267	22.8379	22.7061	22.7516	22.7707	23.087	22.6728	22.7669
MSMEG_3769	-0.0734665	0.223452	23.774	23.5724	24.1469	23.6343	23.942	23.7999	23.5518	23.9574	23.8521	23.5412
MSMEG_3962	-0.326522	0.24269	23.3045	22.6534	23.7475	23.5153	25.3476	23.3481	23.2644	23.1359	22.6006	24.5866
MSMEG_4270	0.0796936	0.245212	23.7952	23.4906	23.9491	23.8734	23.5392	24.0034	24.012	23.8255	23.7214	23.4837
MSMEG_4295	-0.268419	0.861073	23.5728	23.7869	23.3593	23.2201	23.4193	23.5254	22.8361	23.3721	23.324	22.9586
MSMEG_4367	0.114096	0.196559	25.3009	25.5098	26.0239	25.9771	25.2659	25.8919	25.7597	25.9952	25.9148	25.0863
MSMEG_4937	0.33434	1.61251	24.8638	24.9212	25.3462	25.0471	25.1612	25.2955	25.1415	25.5465	25.6064	25.4212
MSMEG_4950	0.0735809	0.265284	23.6508	23.4082	23.791	23.7181	23.5467	23.9214	23.7404	23.8387	23.5937	23.3885
MSMEG_5055	-0.144408	1.13755	25.7244	25.5829	25.6534	25.7585	25.661	25.5826	25.7345	25.5406	25.4211	25.3792
MSMEG_5132	-0.455489	1.58239	25.1156	25.2576	24.6476	24.703	24.576	24.1448	24.6137	24.4269	24.6108	24.2261
MSMEG_5198	-0.38373	1.40622	25.3024	24.8863	24.6717	24.8307	25.1392	24.9469	24.5148	24.3859	24.373	24.6911
MSMEG_5773	-0.0780106	0.3436	23.6699	23.8878	24.0882	23.7681	23.9182	23.7114	24.0374	23.8216	23.7371	23.6347
MSMEG_5824	-0.175779	0.955589	23.8975	23.6051	23.4765	23.3966	23.4509	23.5331	23.3944	23.3592	23.3648	23.2963
MSMEG_6353	0.0171288	0.0414919	24.9593	25.2658	25.4443	25.5573	25.216	25.5038	25.3855	25.3975	25.3297	24.9117
MSMEG_6458	-0.211969	0.610896	23.7783	23.7394	24.2373	23.7811	23.7479	23.8711	23.9781	23.7323	23.3886	23.2539
MSMEG_0035	0.0764488	0.16015	26.2083	25.5888	25.5736	25.514	25.853	26.1083	25.366	25.7307	25.852	26.063
MSMEG_0692	-0.175438	0.588622	23.637	23.8179	23.284	23.2617	23.6318	23.1919	23.3793	23.3566	23.1458	23.6817
MSMEG_0710	0.111731	0.382375	26.8614	26.6695	26.4637	26.5345	26.1894	26.8808	26.6249	26.4757	26.6013	26.6944
MSMEG_0759	0.044352	0.0778137	24.8164	24.9056	25.6913	25.3536	24.9689	25.2665	25.0995	25.5997	25.1751	24.8168
MSMEG_0783	-0.107483	0.215049	22.5515	22.4271	23.0051	22.7524	22.5483	22.707	22.495	22.9334	22.7044	21.9072
MSMEG_1517	-0.317599	0.999734	23.1159	23.0408	22.9113	22.7962	23.4063	22.6383	22.5259	22.5577	22.694	23.2666
MSMEG_1669	0.109374	0.323096	25.519	25.8036	26.267	26.0728	26.0357	25.9754	26.0482	26.175	26.2156	25.8306
MSMEG_2580	-0.431629	2.04016	23.4623	23.527	23.0681	23.0846	23.006	22.7276	22.9221	22.7935	22.9432	22.6034
MSMEG_2739	-0.323399	1.32152	24.721	24.3292	24.0477	24.1518	24.2508	23.9026	23.7108	24.1279	24.0818	24.0604
MSMEG_3086	0.544751	3.6247	25.3757	25.3245	25.5749	25.6085	25.2323	26.0069	26.1025	25.8739	25.8477	26.0088
MSMEG_3122	-0.233342	1.17789	24.3261	23.8876	23.9047	23.9019	23.9068	23.9827	23.6269	23.6722	23.8406	23.6381
MSMEG_3199	-0.255202	1.5439	24.9129	24.6515	24.4901	24.5837	24.5729	24.6242	24.3335	24.3829	24.3386	24.2558
MSMEG_3206	0.0538727	0.118782	23.1541	23.2224	23.9245	23.6872	23.7555	23.6884	23.399	23.7811	23.7075	23.4372
MSMEG_3419	-0.280241	0.484931	25.735	26.6741	26.2581	26.5197	26.8942	25.5085	26.022	26.3927	26.207	26.5497
MSMEG_3619	-0.286789	1.30251	27.034	27.1065	26.5763	26.8289	27.0134	26.7046	26.6388	26.3644	26.5713	26.846
MSMEG_3881	-0.147309	1.41914	24.2245	24.1123	24.3072	24.1963	24.2479	24.181	24.1748	24.0613	24.02	23.9147
MSMEG_4189	-0.088369	0.203341	23.928	23.7258	24.1824	23.9263	23.7033	24.0662	23.9276	24.0965	23.6424	23.2912
MSMEG_4200	-0.13028	0.381372	23.8075	23.7287	24.3677	24.2246	24.1322	23.9765	23.7558	24.1013	24.1061	23.6697
MSMEG_4222	-0.0521812	0.194787	25.1169	25.2237	24.7997	24.9968	24.7559	25.0323	24.7921	24.9291	25.0769	24.8018
MSMEG_4254	-0.188496	2.50963	24.1272	23.9859	23.9876	23.9493	24.034	23.9466	23.763	23.8132	23.8459	23.7726
MSMEG_4276	-0.134986	0.372705	25.0623	24.9668	25.4863	25.2889	25.1697	25.1092	25.0902	25.3938	25.1258	24.5802
MSMEG_4278	0.317691	1.60272	25.3073	25.1532	25.5295	25.7727	25.3609	25.762	25.766	25.7675	25.8477	25.569
MSMEG_4306	0.0554314	0.194616	25.5527	25.8893	25.9557	26.0429	25.8575	25.813	25.8876	26.0615	26.116	25.6972
MSMEG_4340	0.027998	0.0514462	25.9481	25.9926	26.4597	26.447	25.9134	26.2335	26.304	26.483	26.2678	25.6124
MSMEG_4463	-0.0742718	0.188027	23.2634	23.1103	23.654	23.466	23.3264	23.4433	23.2273	23.5411	23.4124	22.8247
MSMEG_4617	-0.0382927	0.0765384	23.3847	23.3809	23.8947	23.6843	23.4559	23.6529	23.5109	23.9237	23.5296	22.9919
MSMEG_4626	-0.306805	0.990422	24.882	24.7343	24.0863	24.3196	24.4038	24.1624	24.2716	23.8879	24.1752	24.3949
MSMEG_4646	-0.367178	1.33883	24.5937	24.2256	23.9911	23.7407	24.0087	23.8693	23.5177	23.7228	23.8023	23.8118
MSMEG_4891	-0.0789917	0.180548	28.1808	27.887	28.1868	28.0755	27.9117	28.3736	28.0155	28.1381	27.9146	27.405
MSMEG_4916	-0.0384293	0.0786675	22.2737	22.4254	23.0172	22.8475	23.0766	22.7712	22.5869	22.8128	22.8354	22.4418
MSMEG_5104	0.0709026	0.275163	25.0447	25.3231	25.228	25.2861	24.9119	25.3789	25.2657	25.3136	25.2456	24.9445
MSMEG_5183	-0.187882	0.92639	25.8867	25.8988	25.6071	25.7619	25.5618	25.8334	25.5461	25.4956	25.5763	25.3254
MSMEG_5422	-0.177388	1.38496	24.3177	24.1888	24.1815	24.2166	24.2708	24.1867	24.1065	24.1733	24.0052	23.8169
MSMEG_5435	-0.212346	0.518864	24.3978	24.4447	25.1904	24.5469	24.5114	24.3514	24.6331	24.6693	24.4134	23.9622
MSMEG_5441	-0.157215	0.531836	23.8154	23.6768	24.4002	23.8453	24.0056	23.7443	23.961	23.8819	23.7862	23.5839
MSMEG_5524	0.143454	0.591918	28.7411	28.7827	28.9773	29.0688	28.6154	29.2245	28.9998	28.9033	29.0564	28.7186
MSMEG_5939	-0.0184536	0.0543145	26.4386	26.6661	26.2597	26.3857	26.2717	26.709	26.1307	26.3265	26.4542	26.3091
MSMEG_6024	-0.0438862	0.0800162	22.8526	22.8304	23.4779	23.0712	23.0915	23.3048	22.9851	23.3677	22.9957	22.4507
MSMEG_6074	-0.0296417	0.0530303	23.515	23.3911	24.0825	23.6046	23.6009	23.6219	23.6937	24.1391	23.414	23.1772
MSMEG_6142	0.129025	0.503057	25.3293	25.2972	25.7671	25.7276	25.4769	25.6185	25.6969	25.7215	25.8077	25.3985
MSMEG_6189	-0.0696651	0.140048	25.5753	25.016	24.8165	24.7273	25.1409	25.1214	24.6196	24.8899	25.334	24.9629
MSMEG_6404	-0.019804	0.0468944	25.4224	25.3001	25.8261	25.6378	25.6257	25.7169	25.4798	25.7362	25.6721	25.1082
MSMEG_6410	0.0485909	0.0939319	24.2151	24.1539	24.9528	24.4887	24.4147	24.6416	24.4307	24.8635	24.4458	24.0866
MSMEG_6467	0.483471	1.16874	27.1961	27.424	27.138	27.2345	27.4273	27.2597	27.742	27.595	27.6509	28.5896
MSMEG_6783	1.26291	4.01942	23.3207	23.586	23.8208	23.5667	23.1167	24.8808	24.8447	25.0922	24.5266	24.3812
MSMEG_6933	0.054324	0.185344	26.0928	26.0023	26.0058	26.1558	25.9041	25.9624	26.303	26.308	26.1201	25.7391
MSMEG_0401	-0.196965	0.383676	23.7257	23.8043	24.6453	24.2774	24.1014	24.0533	24.1375	24.2697	23.6806	23.4282
MSMEG_0464	-0.0477394	0.18726	24.9479	25.4998	25.135	25.0234	25.071	25.09	25.0809	25.1883	25.0915	24.9876
MSMEG_1265	-0.113565	0.400561	23.7211	23.7859	24.0917	23.9441	23.8089	23.8733	23.8904	23.8962	23.795	23.329
MSMEG_1652	0.0953255	0.177999	25.9588	26.245	26.7588	26.3955	25.6276	26.2029	26.3082	26.2902	26.5978	26.0632
MSMEG_1665	0.0695728	0.280707	24.3352	24.3776	24.7617	24.74	24.437	24.552	24.631	24.6586	24.7253	24.4325
MSMEG_2391	0.0172012	0.0365409	23.3592	23.0979	23.5516	23.2383	23.1043	23.3325	23.544	23.6058	23.1091	22.8458
MSMEG_2407	-0.199326	1.45475	26.4608	26.3754	26.2501	26.3014	26.3214	26.3463	26.2396	26.1472	26.0048	25.9747
MSMEG_2430	-0.373257	1.30317	23.5346	23.4584	22.8266	23.0953	23.4429	22.7158	22.8746	22.6949	23.0807	23.1254
MSMEG_2723	0.795728	3.23645	24.0288	24.191	23.705	23.5966	23.6358	24.6329	24.3985	24.6522	24.9131	24.5391
MSMEG_2727	-0.0406559	0.159936	26.4009	26.7827	26.4506	26.3406	26.2488	26.3608	26.4114	26.487	26.4818	26.2794
MSMEG_2758	-0.27052	0.778053	26.3291	26.235	25.7182	25.9982	26.3485	25.9475	25.8557	25.5245	25.6574	26.2913
MSMEG_3072	-0.239508	0.862208	24.5631	24.3828	24.7624	24.5736	24.4531	24.449	24.5582	24.5039	24.1599	23.8665
MSMEG_3100	-0.0601719	0.347005	24.0392	23.8282	24.0189	24.0128	24.0473	24.1318	23.886	23.9376	23.9554	23.7348
MSMEG_3219	-0.335499	1.40901	26.6882	26.7747	26.2059	26.2608	26.4404	26.1361	26.1684	26.061	25.9316	26.3953
MSMEG_4281	-0.191461	0.606665	25.1154	25.1601	24.6039	24.4381	24.805	24.5027	24.6388	24.4882	24.7891	24.7464
MSMEG_4958	-0.0543365	0.110556	23.8548	23.5471	24.2365	24.0824	23.9699	24.0006	23.9886	24.2721	23.7287	23.4291
MSMEG_5022	-0.161716	0.0743974	19.5268	21.256	21.0872	22.0286	22.9723	20.0193	20.8338	20.5617	21.4654	23.1821
MSMEG_5070	-0.36584	1.53266	25.7091	25.5476	25.1011	25.109	25.2676	25.105	24.7341	24.979	25.0064	25.0808
MSMEG_5239	-0.156221	0.655398	25.9683	26.3092	26.2443	26.3578	25.9673	25.9023	26.2025	26.1752	26.0192	25.7666
MSMEG_5512	-0.209008	0.940861	23.5019	23.514	23.4768	23.3467	23.631	23.1911	22.9825	23.2411	23.6434	23.3672
MSMEG_6008	0.0652905	0.166582	24.4098	24.4529	24.7772	24.8094	24.5401	24.8439	24.566	24.9359	24.7621	24.208
MSMEG_6512	-0.0794827	0.257447	25.7551	25.7432	26.2115	26.3263	26.1604	25.8613	26.0761	26.0184	25.8743	25.9689
MSMEG_6518	-0.19396	0.553998	29.3495	29.2753	28.5892	28.9557	28.9745	28.9263	28.9859	28.59	28.6099	29.0623
MSMEG_0386	0.574202	2.2078	24.2419	24.562	25.0907	24.8114	24.5304	25.0857	25.1918	25.2786	25.4322	25.1191
MSMEG_0690	-0.289776	1.14336	24.3304	24.5066	23.8327	24.088	24.3774	23.7966	23.775	23.9156	24.0481	24.1509
MSMEG_0935	0.053347	0.225194	26.8612	26.7388	27.0506	26.96	26.9091	27.1055	26.9008	26.8993	27.1677	26.7132
MSMEG_1285	-0.0836262	0.58976	24.6275	24.659	24.561	24.4872	24.6808	24.7486	24.4335	24.4414	24.5083	24.4658
MSMEG_1439	0.295853	0.765842	27.0425	26.8554	26.77	26.9113	26.952	27.7459	27.4485	26.8746	26.6851	27.2564
MSMEG_1610	-0.0592812	0.152979	24.8363	24.8369	25.2781	25.0976	25.0231	25.0124	25.1378	25.2366	24.8658	24.5231
MSMEG_1662	-0.0441925	0.102389	25.4911	25.3953	26.0309	25.8223	25.8344	25.746	25.4738	25.966	25.7959	25.3713
MSMEG_1735	0.00537529	0.0145143	24.7543	24.8375	25.2213	24.9976	24.8531	25.1001	24.9239	25.0897	25.0015	24.5754
MSMEG_2374	-0.121606	0.365077	25.7078	25.4277	25.2296	25.1156	25.1074	25.198	24.9609	25.2809	25.4941	25.0461
MSMEG_2378	-0.0730919	0.275989	24.4489	24.0571	23.8437	23.9012	24.1016	23.983	23.8929	24.0005	24.107	24.0036
MSMEG_2383	-0.213089	0.942297	24.3003	24.0684	24.5277	24.2456	24.4026	24.1885	24.2679	24.2483	23.9921	23.7824
MSMEG_2450	0.0166409	0.0518255	25.2468	25.2399	25.5452	25.4337	25.4509	25.5848	25.3651	25.562	25.4398	25.0479
MSMEG_2658	0.0548985	0.139718	26.2624	26.4099	25.9663	26.2	25.823	26.5025	26.0959	26.1737	26.3076	25.8564
MSMEG_3217	-0.121865	0.371211	24.3314	24.2119	24.7189	24.405	24.4134	24.4357	24.2369	24.5455	24.389	23.8641
MSMEG_3247	-0.0616245	0.271809	26.0487	26.0924	25.9216	25.9172	26.2779	26.0151	25.7756	25.9021	26.1232	26.1337
MSMEG_4217	-0.099622	0.287796	28.7278	28.6891	28.1541	28.5602	28.6366	28.5654	28.4639	28.1777	28.2939	28.7688
MSMEG_4301	-0.00125313	0.00232439	24.8105	24.8911	25.4581	25.1208	24.5599	25.1003	25.0032	25.2148	24.8817	24.6342
MSMEG_4328	-0.0354355	0.069804	24.9159	25.1807	25.71	25.5931	25.2474	25.2751	25.597	25.4514	25.2204	24.926
MSMEG_4527	-0.325912	1.53373	24.5774	24.2047	24.2559	24.0046	24.4061	24.1816	23.7966	23.8633	23.8667	24.1109
MSMEG_4633	0.126601	0.220425	23.433	23.0774	23.9389	23.6843	23.449	23.804	23.5678	24.0086	23.8702	22.965
MSMEG_4918	-0.00132141	0.00200027	22.6028	22.4671	23.2911	23.0622	23.0634	22.812	22.6875	23.3516	23.158	22.4708
MSMEG_5037	-0.062685	0.181387	25.0115	24.8417	25.1738	25.2226	24.9332	25.2096	24.9588	25.0997	25.0642	24.537
MSMEG_5089	-0.2555	0.820791	23.884	23.8601	23.3584	23.2199	23.4751	23.4882	23.2362	23.2118	23.055	23.5287
MSMEG_5222	-0.0464218	0.214657	24.9972	24.8308	24.5885	24.6974	24.7314	24.7877	24.6997	24.5213	24.8014	24.8032
MSMEG_5270	0.0624714	0.147938	24.4668	24.4435	24.7887	24.5502	23.9559	24.5378	24.7067	24.6831	24.2978	24.2919
MSMEG_5782	-0.135864	0.622076	24.1659	24.3476	23.9695	24.0073	24.2078	24.0926	23.8819	23.9054	23.8553	24.2836
MSMEG_6232	0.100814	0.152617	24.3545	24.241	25.053	24.8044	25.2883	24.5883	24.3998	25.2827	24.911	25.0635
MSMEG_6507	0.203189	0.387465	24.4281	24.725	25.5218	24.932	25.1555	25.0997	24.9555	25.6326	25.2733	24.8172
MSMEG_6511	-0.286898	1.96121	25.2406	25.0664	25.4871	25.4629	25.4497	24.9835	25.0641	25.0872	24.993	25.1444
MSMEG_6759	-0.0665184	0.128945	25.8473	26.2093	25.4	25.9884	25.721	25.6141	25.9375	25.4031	26.2208	25.6579
MSMEG_0001	0.0999775	0.469587	25.4903	25.2651	25.6168	25.6761	25.5582	25.6559	25.7576	25.6782	25.6549	25.36
MSMEG_0531	-0.0237995	0.0567206	25.1519	24.6138	25.3615	25.1625	25.134	25.3743	24.9978	25.0357	25.0128	24.8841
MSMEG_1416	-0.267765	2.29692	25.326	25.0515	25.2415	25.1374	25.1065	25.0335	24.9312	24.98	24.7886	24.7908
MSMEG_1484	-0.159862	0.616949	28.723	28.6298	28.1952	28.4498	28.6995	28.4932	28.397	28.2716	28.1439	28.5921
MSMEG_1602	-0.282746	1.34303	25.1327	25.0905	24.7021	24.5538	24.6703	24.5888	24.5694	24.5034	24.497	24.5771
MSMEG_1603	-0.0811531	0.293384	25.7964	25.9595	26.0334	25.9496	25.7424	25.8554	26.0793	25.9834	25.53	25.6275
MSMEG_1647	-0.0670536	0.197784	25.1991	25.6971	25.1962	25.2475	24.9246	25.3829	25.1145	25.1263	25.2107	25.0948
MSMEG_1809	0.155399	0.630972	25.7865	25.9804	26.357	26.2907	26.0568	26.2804	26.233	26.4019	26.3015	26.0315
MSMEG_1957	-0.262599	1.06342	23.8839	24.1775	23.845	23.9589	24.2163	23.4996	23.5272	23.735	23.9587	24.0481
MSMEG_2086	0.104423	0.416131	25.1399	25.099	25.4112	25.3907	24.9638	25.5563	25.2362	25.3579	25.2518	25.1246
MSMEG_2351	0.0750916	0.373902	29.9788	30.3734	29.9882	30.1964	30.1251	30.3145	30.1461	30.0588	30.3253	30.1926
MSMEG_2352	0.0484089	0.135665	30.3599	30.3903	29.9259	30.1831	29.8532	30.4773	30.0434	30.1419	30.2474	30.0445
MSMEG_2695	-0.180975	0.573116	27.3993	27.5745	26.8498	27.3131	27.3132	27.0025	27.0598	26.9167	27.1074	27.4586
MSMEG_3101	0.096674	0.270272	24.9376	24.7613	25.4085	25.2502	25.0737	25.3809	25.0674	25.3988	25.1861	24.8815
MSMEG_4485	-0.113836	0.345968	25.5464	25.5425	26.056	25.7343	25.7242	25.6791	25.584	25.9009	25.6431	25.2271
MSMEG_4533	0.0711014	0.604936	26.7831	26.6907	26.7272	26.5576	26.7104	26.8367	26.607	26.8388	26.8001	26.742
MSMEG_5442	0.0322468	0.0659406	23.3257	22.9987	23.6817	23.5106	23.3673	23.649	23.3676	23.6992	23.3878	22.9416
MSMEG_5525	0.232682	1.23832	28.9935	28.8336	29.2887	29.0988	29.082	29.4897	29.2402	29.3655	29.3236	29.0412
MSMEG_5715	-0.038147	0.0816773	26.0418	26.2355	26.7647	26.6691	26.4662	26.5754	26.3971	26.5997	26.404	26.0104
MSMEG_5847	0.123959	0.493109	24.6479	24.5584	25.0687	24.7852	24.8258	24.9517	24.762	25.1851	24.8291	24.778
MSMEG_6452	-0.258183	2.35205	26.2816	26.1513	26.0933	26.0176	26.2132	26.0321	25.894	25.937	25.7428	25.8602
MSMEG_6904	0.057655	0.15102	27.6974	27.5129	27.9728	27.8879	27.6525	28.0561	27.8017	27.9815	27.8195	27.353
MSMEG_0769	-0.101589	0.310589	25.3816	25.2225	25.7273	25.6019	25.6249	25.5015	25.3772	25.6456	25.5042	25.0216
MSMEG_0777	-0.117113	0.259398	26.7814	26.5585	27.2889	26.8884	26.7703	26.921	26.8197	27.0969	26.605	26.2594
MSMEG_0826	-0.130249	0.495336	25.2039	24.925	25.5299	25.3108	25.2854	25.305	25.0497	25.2502	25.1115	24.8873
MSMEG_2731	-0.322514	1.05615	26.4395	26.3053	25.7563	25.9773	26.2409	25.988	25.8302	25.5847	25.5653	26.1384
MSMEG_2931	-0.191659	0.811444	24.5861	24.2638	24.6298	24.3581	24.5249	24.639	24.2479	24.3141	24.0508	24.1526
MSMEG_3084	-0.0193703	0.0632283	29.9379	29.8659	30.0073	30.1728	29.8971	30.181	29.9442	29.9734	30.0724	29.6132
MSMEG_3159	-0.0868366	0.256283	25.6282	25.4333	25.9808	25.7906	25.769	25.8116	25.5123	25.9261	25.5947	25.3231
MSMEG_3257	-0.0842545	0.24263	26.0412	26.1451	26.0353	26.3133	25.9721	26.3347	25.9557	26.1959	26.0304	25.5692
MSMEG_4959	-0.00778542	0.0172152	24.3524	24.5089	25.0595	24.8431	24.5803	24.6296	24.9076	24.8202	24.4192	24.5287
MSMEG_5721	-0.170472	0.514355	27.152	26.3973	27.113	27.019	27.1	27.0313	26.7089	26.7516	26.7881	26.6491
MSMEG_6286	0.027895	0.0608363	25.3778	25.1758	25.7096	25.5207	25.3098	25.7055	25.3771	25.6621	25.5368	24.9516
MSMEG_6746	0.120465	0.387145	24.5527	24.6382	25.2332	24.8847	24.8301	24.8734	24.8988	25.2316	24.9133	24.8241
MSMEG_0643	0.0241928	0.0893825	25.5569	25.3444	25.1627	25.254	25.4052	25.3505	25.2144	25.2049	25.528	25.5464
MSMEG_1574	0.0466835	0.121635	25.4112	25.4324	25.9007	25.7254	25.5506	25.8368	25.5503	25.8319	25.7773	25.2574
MSMEG_1684	0.021875	0.0695628	25.887	25.6884	25.9426	25.8818	25.6166	26.1131	25.7842	25.9256	25.7565	25.5464
MSMEG_2611	0.0490498	0.0884419	24.3063	24.3059	24.6749	24.5665	24.187	24.5993	24.4453	24.8446	24.6221	23.7744
MSMEG_4283	-0.261388	1.19054	27.9235	27.6954	27.296	27.4257	27.5287	27.4271	27.3807	27.1974	27.1646	27.3926
MSMEG_4327	0.2875	1.21422	26.7027	26.9387	27.2834	27.2842	26.9244	27.2113	27.375	27.4299	27.4544	27.1002
MSMEG_4474	0.100896	0.300569	24.3535	24.219	24.8012	24.6715	24.6878	24.8679	24.5591	24.8051	24.6455	24.3597
MSMEG_4915	-0.161766	0.418044	23.7422	23.8242	24.5087	24.0893	24.0749	23.8253	24.0931	24.2019	23.6632	23.647
MSMEG_4920	0.145001	0.508458	27.3503	27.9233	27.7188	27.864	27.6332	27.7872	28.0208	27.7851	28.0496	27.5717
MSMEG_4939	-0.0643108	0.182179	25.1425	25.0282	25.0899	24.9318	25.512	24.9285	24.8319	25.073	25.4029	25.1467
MSMEG_4954	-0.518609	1.41629	26.9321	26.833	26.053	26.2403	26.6933	25.9951	26.22	25.8634	25.7065	26.3736
MSMEG_4956	0.00978165	0.0692857	26.351	26.5418	26.5086	26.4557	26.3097	26.4738	26.4049	26.4716	26.4979	26.3674
MSMEG_5427	0.203936	0.64061	26.1134	26.02	26.6656	26.4826	26.0664	26.4051	26.5705	26.6075	26.6315	26.1532
MSMEG_5515	0.00748215	0.0194503	25.7642	25.6526	26.229	25.9222	25.8468	25.9637	25.83	26.0809	26.0043	25.5732
MSMEG_5789	0.56539	2.95151	27.8535	27.9626	28.3702	28.4311	28.0827	28.6625	28.7259	28.7614	28.6981	28.6791
MSMEG_0006	-0.213106	0.916271	24.4107	24.1816	23.928	23.9046	24.0588	24.1525	23.6943	23.8435	23.9619	23.766
MSMEG_0899	0.232136	0.540783	23.6612	23.7213	24.3609	24.1257	23.8967	24.3996	24.0327	24.4757	24.382	23.6366
MSMEG_0903	0.166031	0.98819	25.7343	25.6253	25.8814	25.722	25.5104	25.9378	25.8313	25.9309	25.9861	25.6175
MSMEG_2136	-0.12005	0.455751	24.2531	24.068	24.3983	24.2823	24.149	24.1998	24.2281	24.36	24.0212	23.7413
MSMEG_2520	-0.110199	0.380114	29.5812	29.6967	29.2032	29.496	29.694	29.4362	29.5282	29.2098	29.2446	29.7014
MSMEG_4535	0.158846	0.309354	24.438	24.836	25.2355	25.0514	24.6236	24.9878	25.1216	25.3834	25.1054	24.3803
MSMEG_4630	-0.0347244	0.0857896	23.6659	23.7932	24.293	23.8429	23.9022	23.9275	24.1673	23.9635	23.594	23.6713
MSMEG_5415	0.0369911	0.115698	28.865	28.7669	29.0861	29.1616	28.9157	29.1804	29.0501	29.0545	29.0709	28.6243
MSMEG_6242	0.00120277	0.00275039	30.596	30.0449	30.3897	30.556	30.7981	30.7387	30.3091	30.3436	30.478	30.5213
MSMEG_6271	-0.0949551	0.455827	24.1264	23.9636	24.3263	24.0117	24.082	23.9528	24.1822	24.1765	23.8623	23.8615
MSMEG_1670	0.157239	0.378458	26.4059	26.7933	27.0837	27.1229	26.8103	27.1516	26.9738	27.2143	27.1643	26.4982
MSMEG_3085	0.0087986	0.0289041	27.4812	27.3875	27.6798	27.7339	27.6311	27.7509	27.5926	27.7157	27.6199	27.2783
MSMEG_4464	-0.0796925	0.232703	24.2478	24.2816	24.5338	24.5728	24.4367	24.5132	24.2969	24.6241	24.3417	23.8983
MSMEG_4700	-0.352843	1.84127	25.8761	25.6785	25.4572	25.2937	25.3356	25.2647	25.1934	25.1931	25.1118	25.1138
MSMEG_5199	0.0204506	0.0580135	26.702	26.8918	26.5036	27.0114	26.5479	26.97	26.6415	26.522	26.8689	26.7565
MSMEG_5249	0.14346	0.429433	26.8216	26.7344	27.2089	27.0993	26.7262	27.0409	27.1145	27.3572	27.1411	26.654
MSMEG_5841	0.0964012	0.335441	25.3972	25.2708	25.7076	25.4856	25.2954	25.6279	25.5881	25.6552	25.6236	25.1437
MSMEG_1524	-0.0379665	0.435513	27.9582	27.9913	28.0141	27.9039	27.9013	27.9732	27.8792	27.916	27.8149	27.9958
MSMEG_2367	-0.104378	0.634204	25.9556	25.8297	26.0827	26.0313	26.1083	25.9924	25.8542	26.0048	25.9664	25.6679
MSMEG_3025	-0.363176	1.9191	25.1114	24.985	24.8688	24.7228	24.7895	24.6074	24.7177	24.364	24.2816	24.6909
MSMEG_3158	-0.107186	0.446999	25.9437	25.6206	26.105	25.9519	26.0073	26.0081	25.6779	25.9635	25.8	25.643
MSMEG_3777	-0.163534	0.494992	24.8378	24.7891	25.2296	25.0357	25.0014	24.9881	24.929	25.1351	24.6214	24.4024
MSMEG_3864	-0.00196838	0.00447524	23.4131	23.4475	23.9566	23.7418	23.965	23.8159	23.5729	23.9195	23.7771	23.4288
MSMEG_5211	-0.029723	0.042919	23.6605	23.5384	24.2651	23.852	23.4566	23.8362	23.9299	24.1439	23.7256	22.9884
MSMEG_6256	0.0150017	0.042522	26.5866	27.267	26.8722	26.8265	26.6398	26.9135	26.7576	26.904	26.8935	26.7984
MSMEG_6391	0.0273129	0.0530093	26.5127	26.6345	27.2726	27.0388	26.7274	26.8989	26.7523	27.2134	26.963	26.4951
MSMEG_2621	-0.149588	0.511238	25.1207	25.1656	25.6084	25.3932	25.3478	25.2995	25.2238	25.4546	25.0822	24.8277
MSMEG_2839	-0.0665188	0.282496	25.8498	25.7837	25.3886	25.523	25.669	25.6595	25.4537	25.4636	25.5865	25.7182
MSMEG_3632	0.15515	0.400106	25.6101	25.7787	26.5244	25.9071	25.8819	26.0713	25.9032	26.3807	26.0918	26.031
MSMEG_4290	0.157174	0.35443	27.8897	27.946	28.6116	28.2872	27.914	28.4802	28.1843	28.6359	28.2842	27.8498
MSMEG_4323	0.0777706	0.199549	24.4531	24.3035	24.9787	24.6558	24.459	24.8868	24.6056	24.8675	24.5435	24.3355
MSMEG_5240	-0.0890652	0.348469	27.8652	27.9166	28.0421	28.0056	27.8898	27.9599	27.849	28.0292	27.9892	27.4466
MSMEG_5541	0.177753	0.720901	26.2842	26.1816	26.6103	26.4434	26.2277	26.6931	26.4225	26.6925	26.6294	26.1986
MSMEG_5839	0.0578602	0.115756	24.5577	24.563	25.1926	24.8678	24.7401	24.943	24.6691	25.2431	24.9737	24.3815
MSMEG_0732	-0.32822	1.65263	24.7635	24.4397	24.1378	24.2998	24.2879	24.2376	23.9989	23.9901	24.0734	23.9876
MSMEG_3507	-0.0581299	0.164927	29.3741	29.5834	28.9346	29.2013	29.2086	29.4755	29.048	28.9866	29.2488	29.2525
MSMEG_3634	-0.0264881	0.133883	25.3213	25.5685	25.6155	25.4727	25.2952	25.3446	25.5716	25.451	25.3801	25.3934
MSMEG_3642	-0.00397415	0.00684926	25.1852	24.9708	25.8094	25.4428	25.6835	25.5902	25.1191	25.7046	25.5241	25.1339
MSMEG_4674	-0.163421	0.717368	28.6043	28.7637	28.273	28.2799	28.4421	28.3796	28.2828	28.2655	28.1151	28.5028
MSMEG_5672	0.00469398	0.00881259	27.6972	27.7366	28.2035	28.0852	27.7692	28.0345	27.9009	28.2307	28.0006	27.3484
MSMEG_6179	0.19144	0.858981	27.6703	27.2778	27.4852	27.7818	27.4656	27.8278	27.8752	27.6353	27.8307	27.469
MSMEG_6393	-0.0815067	0.297691	26.4757	26.3776	26.2543	26.064	25.9426	26.2909	26.2332	26.0543	26.1829	25.9453
MSMEG_0911	0.202883	0.861433	28.5578	28.6661	28.9369	29.0261	28.7602	28.9167	29.0696	28.9568	29.2751	28.7432
MSMEG_3055	0.265082	1.48771	27.8803	27.9013	28.3276	28.1814	27.8646	28.3604	28.2912	28.3766	28.3055	28.1468
MSMEG_5049	-0.224256	0.724721	25.2966	25.1499	24.5968	24.7177	24.7946	24.8821	24.4736	24.5256	24.7234	24.8296
MSMEG_0229	0.113957	0.316319	26.8972	26.8844	27.2962	27.2098	26.9064	27.1778	27.1452	27.4831	27.2548	26.7031
MSMEG_1401	-0.117052	0.874381	30.6229	30.7941	30.8091	30.8269	30.7722	30.4485	30.8044	30.5997	30.6756	30.7117
MSMEG_1547	0.0406544	0.0826356	26.6455	26.3696	26.0885	26.5285	26.8116	26.5637	26.5567	26.035	26.7708	26.7208
MSMEG_1583	-0.324667	1.29323	29.8794	29.7198	29.2801	29.3477	29.5564	29.1933	29.2218	29.1529	29.0376	29.5543
MSMEG_1813	0.377562	1.18796	27.3007	27.3825	27.9564	27.8822	27.2417	28.0214	27.9409	28.0751	28.0334	27.5805
MSMEG_6091	-0.0372139	0.103493	25.677	25.6179	25.2409	25.3614	25.4592	25.3652	25.1713	25.3145	25.7993	25.5202
MSMEG_0406	-0.0200218	0.0387674	27.6591	27.3625	28.0229	28.1328	28.2353	28.0107	27.6036	27.7787	28.039	27.8805
MSMEG_1807	-0.0304661	0.0890663	29.3271	29.3016	29.5631	29.545	29.1712	29.479	29.3719	29.5736	29.3494	28.9818
MSMEG_1881	-0.217181	1.16141	25.8255	25.7425	25.3323	25.4077	25.5208	25.3032	25.2812	25.2718	25.4026	25.4841
MSMEG_4185	-0.06059	0.115191	24.0046	24.0487	24.7962	24.4268	24.4427	24.3481	24.0897	24.7045	24.3559	23.9179
MSMEG_4936	0.258238	0.801119	27.0791	27.0957	27.7262	27.5248	27.3338	27.4427	27.4825	27.9341	27.8079	27.3836
MSMEG_4938	0.225094	1.47108	27.8439	27.6986	27.9645	28.0163	27.9206	28.0952	28.0191	28.2895	28.2436	27.922
MSMEG_6157	-0.215554	0.920113	25.1725	24.965	24.6264	24.652	24.836	24.7191	24.5926	24.5426	24.4574	24.8623
MSMEG_3461	0.0781429	0.162274	26.6971	26.6577	27.2823	27.1958	26.846	27.082	26.9584	27.3582	27.1399	26.5313
MSMEG_3640	0.0948769	0.270079	27.3743	27.4473	27.9375	27.8284	27.6386	27.9052	27.6072	27.9412	27.8338	27.413
MSMEG_5273	0.269992	1.03032	28.2951	28.826	28.345	28.5187	28.0443	28.8342	28.6882	28.6298	28.7372	28.4896
MSMEG_6384	-0.0179817	0.0390006	26.7798	26.4132	27.0896	26.8661	27.1464	27.1204	26.6092	27.0051	26.7387	26.7318
MSMEG_6917	0.00884209	0.0182703	25.6284	25.543	26.1267	25.8648	25.7953	25.9337	25.7905	26.128	25.8178	25.3325
MSMEG_0234	0.108015	0.258898	26.4326	26.1869	26.8011	26.6203	26.4143	26.7539	26.5906	26.8478	26.7357	26.0671
MSMEG_0255	0.0978806	0.377592	28.5064	28.3865	28.8463	28.7648	28.5894	28.8619	28.6728	28.7723	28.8442	28.4315
MSMEG_2412	0.0948738	0.203887	25.8373	26.0892	26.598	26.2587	25.9903	26.265	26.2715	26.6164	26.3139	25.7811
MSMEG_3169	0.0658142	0.149743	25.0488	24.9154	25.5274	25.3047	25.2182	25.5303	25.1493	25.5561	25.2736	24.8342
MSMEG_3833	-0.0999454	1.172	29.2492	29.0503	29.0482	29.0475	29.1026	29.0833	29.0222	29.0102	28.9441	28.9382
MSMEG_1654	0.110203	0.39912	27.9047	27.7684	28.2959	28.015	28.0988	28.2797	27.9482	28.222	28.2922	27.8916
MSMEG_3103	0.10234	0.326731	27.9997	27.8708	28.3476	28.2304	28.0731	28.4153	28.1172	28.4087	28.2472	27.8449
MSMEG_4690	0.250481	0.780189	26.5232	26.4686	27.0358	26.8283	26.603	27.0494	26.862	27.2821	27	26.5179
MSMEG_5720	-0.142077	0.330403	27.8057	26.9893	27.9223	27.7014	27.9653	27.729	27.4115	27.5699	27.4903	27.473
MSMEG_0402	-0.257365	0.899013	23.4188	23.434	24.1366	23.6831	23.6995	23.3164	23.5295	23.6612	23.3206	23.2575
MSMEG_0709	0.124793	0.756662	29.4794	29.4313	29.548	29.627	29.2717	29.7544	29.5905	29.6578	29.5825	29.3961
MSMEG_0880	-0.198022	0.567435	32.5389	32.3711	31.8173	32.0043	32.1951	31.9734	32.039	31.7624	31.7968	32.3651
MSMEG_2656	0.0434395	0.137435	27.8284	27.9551	28.3202	28.0263	28.0963	28.3151	28.068	28.2681	27.8772	27.915
MSMEG_6392	-0.017907	0.0404821	24.7993	24.9214	24.3882	24.5628	24.5029	24.6229	24.3205	24.6261	25.0421	24.4735
MSMEG_1367	-0.283317	1.69215	26.9639	26.8347	26.8939	26.597	26.7738	26.5191	26.6881	26.7048	26.4234	26.3115
MSMEG_0400	-0.117589	0.216308	24.699	24.6303	25.5915	25.1498	25.0886	24.9986	25.1571	25.2084	24.7059	24.5012
MSMEG_1368	-0.25132	0.816175	26.284	26.1141	26.4197	26.0175	26.0308	25.6144	26.2882	26.1516	25.9532	25.6021
MSMEG_6459	-0.00320587	0.00453479	26.0107	25.8897	26.6998	26.3115	26.1313	26.5558	26.3131	26.5722	26.0495	25.5364
MSMEG_3143	-0.0256809	0.0585501	29.096	28.8625	29.282	29.3613	29.14	29.3705	29.1056	29.278	29.2322	28.6272
MSMEG_4757	0.0371922	0.0631411	29.2157	29.3407	29.8956	29.6515	29.277	29.6757	29.5072	29.883	29.6105	28.8902

## Sheet: Nor 15hr
			Drug-free control replicates			Drug-treated replicates				Proteins exclusively absent in drug-treated samples	Proteins exclusively present in drug-treated samples
Majority protein IDs	log2 Fold Difference(drug/drug free control)	Negative log10 p value	LFQ intensity 1	LFQ intensity 3	LFQ intensity 4	LFQ intensity 7	LFQ intensity 8	LFQ intensity 9		MSMEG_1618	MSMEG_1773
MSMEG_1917	0.288392	0.779031	23.0737	23.5714	23.5221	23.7573	23.5515	23.7236		MSMEG_2038	MSMEG_1811
MSMEG_5771	-2.97066	3.1055	27.8307	27.1174	27.6877	24.4817	24.2139	25.0282		MSMEG_2392	MSMEG_4518
MSMEG_0023	-0.872321	2.09556	23.6409	23.8174	23.9259	23.1727	22.6321	22.9624		MSMEG_2521	MSMEG_6184
MSMEG_0042	-0.92077	1.91694	20.999	20.6662	21.2155	19.7632	20.1612	20.1941		MSMEG_2661	MSMEG_6780
MSMEG_0066	-1.78014	3.17651	27.7051	27.9438	28.0768	25.8345	26.2158	26.3349		MSMEG_2929	MSMEG_0938
MSMEG_0129	0.131662	0.315002	20.6833	20.6861	20.6971	20.4924	20.9016	21.0675		MSMEG_3145	MSMEG_1120
MSMEG_0166	-0.837826	3.24843	23.3042	23.3437	23.5484	22.515	22.5356	22.6323		MSMEG_3686	MSMEG_1269
MSMEG_0356	-1.31564	1.64842	25.7847	25.1776	25.4422	23.563	24.237	24.6575		MSMEG_3822	MSMEG_1325
MSMEG_0672	-0.679859	2.10692	24.2207	24.0974	23.989	23.6573	23.3503	23.26		MSMEG_4165	MSMEG_1434
MSMEG_1136	-1.82399	2.51636	22.5671	23.0904	22.8003	21.0505	21.3824	20.553		MSMEG_4428	MSMEG_3400
MSMEG_1868	-2.16003	3.59042	23.8823	23.5371	23.9682	21.4038	21.7862	21.7175		MSMEG_5681	MSMEG_3440
MSMEG_1922	1.75115	3.04445	22.6143	23.0769	23.2775	24.6972	24.7853	24.7397		MSMEG_6269	MSMEG_3783
MSMEG_2756	-1.40677	3.52378	25.3109	24.9747	25.1624	23.6263	23.8673	23.7341		MSMEG_6288	MSMEG_3880
MSMEG_2944	0.162402	0.256759	20.4807	20.7851	20.9831	20.5337	20.9654	21.2369		MSMEG_6601	MSMEG_4014
MSMEG_3534	0.249848	1.61991	20.4836	20.3178	20.5541	20.7181	20.6889	20.698		MSMEG_0924	MSMEG_4581
MSMEG_3766	-1.55991	2.43994	24.0277	23.8741	23.8322	21.8582	22.6477	22.5483		MSMEG_1375	MSMEG_5004
MSMEG_3804	-2.17317	3.65245	25.2896	25.7052	25.3202	23.0698	23.4391	23.2866		MSMEG_1378	MSMEG_5085
MSMEG_4032	-0.182943	0.55779	23.8826	23.6199	23.7455	23.379	23.8009	23.5192		MSMEG_1563	MSMEG_6313
MSMEG_4353	-1.17296	1.96734	23.2891	22.9135	22.4177	21.7453	21.7821	21.5741		MSMEG_1888	MSMEG_0590
MSMEG_4496	-0.508646	1.07983	22.2554	22.3441	21.9424	21.3115	21.7806	21.9238		MSMEG_3278	MSMEG_2130
MSMEG_5484	-0.583543	0.668102	24.0864	23.0139	23.0731	22.9139	22.44	23.0689		MSMEG_3470	MSMEG_4538
MSMEG_5752	0.313506	0.954027	23.1182	23.0725	23.1692	23.6344	23.1372	23.5287		MSMEG_3897	MSMEG_4909
MSMEG_5797	-1.96087	2.4176	24.6841	24.704	25.0371	23.4405	22.6723	22.4298		MSMEG_4330	MSMEG_6246
MSMEG_5897	-0.548939	1.3225	20.7576	20.6206	20.9104	20.3648	19.8643	20.4127		MSMEG_5574	MSMEG_6790
MSMEG_5904	-2.06829	3.09596	25.5725	25.4319	25.7463	23.1118	23.8029	23.631		MSMEG_6176	MSMEG_0684
MSMEG_6092	-0.275264	1.65857	23.2623	23.4361	23.4827	23.0574	23.1783	23.1195		MSMEG_2630	MSMEG_0956
MSMEG_6895	-1.55961	4.60414	26.8192	26.7384	26.8246	25.3085	25.1051	25.2898		MSMEG_3065	MSMEG_2467
MSMEG_0065	-2.69812	2.70608	28.737	29.0947	28.915	26.8906	26.102	25.6597		MSMEG_5511	MSMEG_2913
MSMEG_0084	-1.65402	2.82835	29.5874	29.8568	29.9383	27.8001	28.1846	28.4358		MSMEG_5557	MSMEG_4162
MSMEG_0251	-1.1421	1.47525	23.3818	22.939	23.2298	22.544	21.4074	22.1728		MSMEG_5688	MSMEG_6017
MSMEG_0399	-0.0653159	0.0448112	26.5553	26.4642	27.1912	25.791	27.1844	27.0394		MSMEG_6560	MSMEG_1327
MSMEG_0415	-0.316498	0.731015	24.0964	24.0158	24.1513	23.5097	23.6532	24.1512		MSMEG_4225	MSMEG_1451
MSMEG_0678	-0.0706075	0.135243	22.5002	22.7069	22.7057	22.2143	22.6819	22.8048		MSMEG_0044	MSMEG_3137
MSMEG_0832	-1.68658	3.25333	25.8997	25.7223	25.9216	23.865	24.2243	24.3945		MSMEG_0063	MSMEG_4717
MSMEG_0884	-0.821274	1.65362	24.5043	23.8288	24.0778	23.1011	23.3729	23.4731		MSMEG_0269	MSMEG_5922
MSMEG_1066	-2.11648	3.64706	23.9086	23.7753	23.9371	21.4394	21.9459	21.8862		MSMEG_0792	MSMEG_1940
MSMEG_1124	-1.84826	3.33654	22.5992	22.4551	22.5423	20.3442	20.828	20.8796		MSMEG_1430	MSMEG_3878
MSMEG_1188	-1.27236	1.80303	23.374	23.3059	23.6393	22.4006	21.574	22.5275		MSMEG_1921	MSMEG_5590
MSMEG_1331	-0.734097	1.81873	21.0275	20.9155	21.0435	20.5374	19.9352	20.3115		MSMEG_3153	MSMEG_0358
MSMEG_1342	-0.270914	1.48277	23.4401	23.2143	23.1823	23.0562	22.9845	22.9832		MSMEG_3200	MSMEG_0418
MSMEG_1440	-0.913804	1.59694	25.7672	26.514	26.5179	25.2777	25.5144	25.2655		MSMEG_3211	MSMEG_0484
MSMEG_1443	0.184422	0.110677	24.6747	25.5189	24.6428	26.1906	24.5745	24.6245		MSMEG_3356	MSMEG_1638
MSMEG_1519	-1.90101	3.16781	26.806	26.68	26.1579	24.6104	24.6425	24.688		MSMEG_4116	MSMEG_3113
MSMEG_1578	-1.51488	1.85461	24.8891	24.5343	24.7181	22.9706	22.7435	23.8827		MSMEG_4172	MSMEG_3228
MSMEG_1600	-1.89363	3.31222	22.7309	22.9166	23.3268	21.119	21.1687	21.0057		MSMEG_4274	MSMEG_3706
MSMEG_1834	-0.216513	0.575203	21.5523	21.4542	21.7248	21.4265	21.0782	21.5771		MSMEG_4349	MSMEG_4114
MSMEG_1874	0.769341	3.0405	22.1006	22.2736	22.3502	22.9258	23.021	23.0857		MSMEG_5671	MSMEG_4338
MSMEG_1947	-1.50287	3.46234	28.272	28.0693	28.4321	26.6494	26.7015	26.914		MSMEG_6281	MSMEG_4653
MSMEG_1958	-1.00852	1.40835	21.87	21.9148	21.8521	20.2137	21.1019	21.2957		MSMEG_0064	MSMEG_5247
MSMEG_2010	0.876463	2.21831	24.4229	24.7682	24.5837	25.3259	25.7308	25.3475		MSMEG_0824	MSMEG_6104
MSMEG_2067	0.262114	0.939831	21.2806	21.2011	20.9227	21.532	21.2844	21.3743		MSMEG_0866	MSMEG_0900
MSMEG_2263	-0.0593351	0.182759	20.6392	20.6977	20.5628	20.7174	20.3413	20.663		MSMEG_0970	MSMEG_1514
MSMEG_2431	-0.0896505	0.19323	20.8041	20.6235	20.4511	20.3339	20.4563	20.8196		MSMEG_2667	MSMEG_2498
MSMEG_2434	0.241174	1.92201	22.2445	22.3939	22.4065	22.6199	22.5923	22.5562		MSMEG_2768	MSMEG_3024
MSMEG_2648	-0.474114	2.50358	20.9357	21.0926	20.9163	20.4298	20.5994	20.4931		MSMEG_4121	MSMEG_3042
MSMEG_2733	-0.695419	1.06322	21.8469	22.0243	21.6767	20.8171	20.9122	21.7324		MSMEG_4229	MSMEG_4117
MSMEG_2754	-0.831022	1.78526	24.0859	23.9412	24.4038	23.6278	23.1715	23.1386		MSMEG_5005	MSMEG_4975
MSMEG_2953	-0.623768	1.62524	24.2092	24.2841	24.3683	23.9746	23.6238	23.3919		MSMEG_5645	MSMEG_5080
MSMEG_2959	0.91246	1.8613	21.6322	21.7848	21.484	22.3247	22.3695	22.9443		MSMEG_6099	MSMEG_5509
MSMEG_3051	-1.1502	1.97474	22.0334	21.6454	21.2002	20.5419	20.3145	20.572		MSMEG_0593	MSMEG_5886
MSMEG_3212	-0.999914	2.33569	24.2435	24.0514	23.7029	23.0699	22.851	23.0772		MSMEG_0858	MSMEG_6012
MSMEG_3357	-0.734332	1.11926	21.8909	22.1469	22.3995	21.2017	21.0828	21.9498		MSMEG_2735	MSMEG_6249
MSMEG_3435	-1.29271	1.76246	23.0139	22.9723	22.904	21.9894	21.014	22.0087		MSMEG_5927	MSMEG_6720
MSMEG_3477	-2.33734	3.05159	24.9949	24.3308	24.8865	22.4704	22.0871	22.6427		MSMEG_6110	MSMEG_6788
MSMEG_3494	-0.472889	1.43686	26.0033	25.8053	25.6076	25.5341	25.257	25.2065		MSMEG_6440	MSMEG_2433
MSMEG_3514	1.92898	3.54615	22.1122	22.5107	22.1843	24.1746	24.0277	24.3919		MSMEG_0862	MSMEG_3844
MSMEG_3648	-0.722841	1.95728	28.2427	28.355	28.2209	27.4603	27.8539	27.3359		MSMEG_4220	MSMEG_3885
MSMEG_3674	-2.62062	3.70583	28.1664	28.1133	28.5403	25.934	25.4297	25.5945		MSMEG_4358	MSMEG_4083
MSMEG_3678	-1.04901	2.26831	20.5003	21.0786	21.0566	19.7869	19.8838	19.8178		MSMEG_6929	MSMEG_5054
MSMEG_3764	0.0191809	0.0387976	24.6678	24.9784	24.5505	24.6204	24.9679	24.6659		MSMEG_0048	MSMEG_6692
MSMEG_3782	1.12377	1.80422	23.0123	23.9608	23.6318	24.6328	24.6937	24.6498			MSMEG_0014
MSMEG_3899	0.252759	0.849379	22.1689	22.2116	22.2826	22.3028	22.7384	22.3802			MSMEG_0404
MSMEG_4125	0.842539	1.59723	21.6661	21.9921	22.3828	22.6324	22.8721	23.064			MSMEG_3861
MSMEG_4181	-0.876693	1.90953	24.3697	23.8425	24.0303	22.9967	23.1696	23.4461			MSMEG_0782
MSMEG_4195	-0.381437	0.761239	24.3736	23.8859	23.9408	23.3671	23.7347	23.9542			MSMEG_4187
MSMEG_4231	-1.2126	2.36341	21.7767	21.5416	21.1832	20.0671	20.3335	20.463			MSMEG_5330
MSMEG_4235	0.0240866	0.0324401	22.4644	22.4	22.6738	22.2219	22.3886	22.9999			MSMEG_0791
MSMEG_4251	-0.301602	0.524932	22.5874	22.0314	22.2978	21.6822	22.3561	21.9735			MSMEG_2595
MSMEG_4261	-0.136126	0.300961	23.4149	23.7526	23.702	23.5983	23.1887	23.6741			MSMEG_2787
MSMEG_4382	-0.408529	3.51199	22.422	22.3907	22.4428	21.996	22.0702	21.9636			MSMEG_1179
MSMEG_4571	-0.598969	0.91537	25.8131	26.5235	26.7782	25.6808	25.9722	25.6649
MSMEG_4673	-0.451828	1.61664	26.1963	26.0262	26.394	25.6143	25.7988	25.848
MSMEG_4724	-0.321721	1.4401	21.719	21.493	21.8138	21.4367	21.3097	21.3142
MSMEG_5042	-1.3109	4.25347	21.957	22.0912	21.9294	20.7208	20.577	20.7471
MSMEG_5154	0.0534261	0.0717826	26.346	25.8503	25.8609	25.9848	26.4598	25.7728
MSMEG_5156	-0.674107	1.4661	21.8715	22.4657	22.5065	21.6924	21.4956	21.6335
MSMEG_5196	-1.31125	0.810844	27.551	26.4092	26.0514	25.8686	26.0382	24.171
MSMEG_5438	-1.69314	3.21243	22.9566	22.7638	23.0376	21.5105	20.9863	21.1819
MSMEG_5617	-1.29358	2.80155	25.6412	25.209	25.2834	23.9116	24.2722	24.0691
MSMEG_5704	-1.96004	2.10263	27.254	27.3127	27.2729	25.2914	26.0221	24.646
MSMEG_5707	-0.264721	0.915853	24.3924	24.0515	24.1123	23.762	23.9478	24.0522
MSMEG_5736	-0.263862	0.424226	22.471	22.8707	22.6922	22.1076	22.2497	22.8849
MSMEG_5770	-2.68239	4.08086	28.7861	28.2439	28.5484	25.9104	25.7463	25.8746
MSMEG_5784	-1.01507	2.99253	22.2384	22.2386	22.5258	21.1799	21.3888	21.3888
MSMEG_6043	0.429967	0.844353	21.913	21.2575	21.6873	21.8392	22.3082	22.0002
MSMEG_6192	1.11605	1.13116	24.2487	25.4652	25.6308	25.9611	26.5131	26.2185
MSMEG_6278	-0.0518195	0.153306	21.9529	21.7146	21.6636	21.6264	21.6454	21.9037
MSMEG_6485	-1.6296	4.97658	23.6821	23.8008	23.8717	22.1801	22.174	22.1118
MSMEG_6541	-1.07134	2.62429	23.0772	22.6184	22.9185	21.7287	21.7122	21.9591
MSMEG_6605	-0.0701828	0.285837	20.2073	20.3167	20.4167	20.1932	20.1397	20.3973
MSMEG_6645	-0.307484	0.425707	27.6957	27.4134	27.6951	26.7694	27.327	27.7854
MSMEG_6665	-0.938739	0.940202	23.4449	22.452	22.1757	21.5695	21.415	22.272
MSMEG_6743	2.00357	1.82354	21.5143	23.1163	22.3382	24.0277	24.5864	24.3654
MSMEG_0007	-0.840763	0.68948	22.9883	22.6096	21.8263	20.8036	21.8125	22.2858
MSMEG_0058	-2.00147	3.14388	25.2248	25.1785	25.3652	22.8491	23.3975	23.5174
MSMEG_0069	-2.62985	4.44989	25.3076	25.1006	24.9785	22.5742	22.3238	22.5991
MSMEG_0081	-1.49963	3.26495	25.5111	25.2843	25.0981	23.6321	23.8278	23.9345
MSMEG_0242	-2.62737	2.81432	25.3563	25.5781	26.0099	22.4561	23.2953	23.3108
MSMEG_0284	1.35771	1.76411	20.5007	21.5808	21.2833	22.2934	22.7215	22.423
MSMEG_0380	-1.12061	2.31198	23.9748	23.6538	23.7692	23.0147	22.4243	22.5971
MSMEG_0381	-0.171675	1.77651	21.1929	21.1751	21.2545	21.0401	21.0961	20.9712
MSMEG_0394	-0.558338	1.80984	24.6814	24.4373	24.3422	23.9173	23.7719	24.0966
MSMEG_0412	-2.3399	3.9931	23.1298	23.2781	23.437	20.7391	20.9241	21.162
MSMEG_0435	-1.65709	1.75885	24.0738	23.2018	22.9308	22.2385	21.5018	21.4948
MSMEG_0436	0.216362	1.01611	21.3841	21.5451	21.6784	21.7234	21.6793	21.8539
MSMEG_0447	-0.81136	1.55886	24.6904	24.8518	24.492	23.4371	24.0458	24.1173
MSMEG_0637	-0.537527	1.55988	22.4598	22.091	22.0733	21.6594	21.5094	21.8426
MSMEG_0639	-0.848848	2.69202	23.2382	23.4339	23.4879	22.6708	22.3625	22.5801
MSMEG_0683	-0.960094	1.8496	25.3766	25.3308	25.2954	23.987	24.7815	24.354
MSMEG_0685	0.372482	0.876599	21.8182	21.4467	21.5629	21.7717	21.8672	22.3064
MSMEG_0686	-1.29496	1.27525	25.289	23.8496	24.0579	22.8206	23.1218	23.3692
MSMEG_0834	-1.23033	1.86002	25.7468	24.8859	24.8739	23.8654	23.9115	24.0387
MSMEG_0835	-0.805724	2.27012	26.4231	26.2258	26.5356	25.7986	25.3999	25.5688
MSMEG_0867	0.245989	0.456431	22.5547	23.1773	22.6589	23.1347	22.786	23.2081
MSMEG_0922	-0.387224	1.64218	23.2106	23.2971	23.0171	22.9245	22.7065	22.7322
MSMEG_1060	-0.557938	1.22619	25.7816	25.7016	25.677	24.7396	25.3875	25.3592
MSMEG_1076	-0.955061	1.39992	28.3129	27.6285	27.5719	26.4799	26.9764	27.1918
MSMEG_1077	-0.26681	0.423677	22.0869	22.0358	22.2517	22.3728	21.5286	21.6726
MSMEG_1089	-0.295521	0.57199	23.9321	23.2992	23.8041	23.1859	23.6134	23.3496
MSMEG_1097	-0.919912	1.67123	24.1794	23.5098	23.3701	22.752	22.8019	22.7457
MSMEG_1180	0.171492	0.410732	21.1912	21.3791	21.1187	21.1689	21.7067	21.3279
MSMEG_1236	0.609106	1.53767	22.8036	22.4732	22.5791	22.9293	23.307	23.4468
MSMEG_1341	-0.333762	0.845031	24.5126	24.8214	24.4485	24.5126	24.0184	24.2502
MSMEG_1356	0.473003	0.73688	21.9422	22.1176	22.44	22.46	22.3149	23.144
MSMEG_1393	0.157921	0.0661315	24.4409	23.9955	21.7959	23.5773	23.2946	23.8342
MSMEG_1403	-0.764174	0.9771	22.8693	23.7383	23.5543	22.1331	22.7532	22.983
MSMEG_1465	-1.06282	4.03988	26.1939	26.3158	26.291	25.1305	25.3128	25.1689
MSMEG_1525	-0.387175	0.502192	23.8256	24.3371	24.8627	23.746	24.2568	23.8611
MSMEG_1528	-2.23841	3.92802	25.6667	25.3524	25.3281	23.1788	23.0498	23.4033
MSMEG_1554	-1.22715	2.12619	23.4768	22.6336	23.085	21.8171	21.895	21.8018
MSMEG_1604	-0.170088	1.04793	22.3201	22.3587	22.5516	22.2693	22.2631	22.1877
MSMEG_1673	-0.226377	0.665421	22.7726	22.7471	23.1977	22.7756	22.6498	22.6129
MSMEG_1736	-0.86001	0.958515	21.5436	20.863	20.7997	19.8542	19.8713	20.9008
MSMEG_1805	-2.08644	3.43016	23.913	23.8125	24.1975	21.898	21.6268	22.1388
MSMEG_1812	0.947755	1.53425	24.036	24.8018	24.4453	25.726	25.2682	25.1321
MSMEG_1820	0.843803	1.40777	24.1926	24.1289	24.0084	24.4061	25.2118	25.2434
MSMEG_1831	-1.39194	2.46184	24.6637	24.4477	24.2714	22.7152	23.1082	23.3836
MSMEG_1873	-0.606619	2.43054	23.0454	23.1577	23.3605	22.5077	22.6368	22.5992
MSMEG_2115	-0.967695	0.945887	25.8161	24.6244	24.3936	23.6049	24.1379	24.1881
MSMEG_2201	1.13426	1.60768	24.0701	24.2597	24.2071	25.6997	25.5579	24.6821
MSMEG_2274	-0.909103	1.48221	25.2652	24.3494	24.6845	23.8479	23.6959	24.028
MSMEG_2376	1.41665	2.45702	22.842	22.8519	22.6015	23.987	24.6098	23.9486
MSMEG_2437	-0.167704	0.428149	23.9384	23.851	23.7185	23.3719	23.7395	23.8934
MSMEG_2625	-1.0504	2.84495	23.2794	23.1054	23.2681	21.9891	22.1129	22.3997
MSMEG_2670	1.32355	2.9705	22.3187	22.3202	22.538	23.9924	23.5651	23.59
MSMEG_2800	-0.221809	1.2537	22.9116	22.753	22.9093	22.5749	22.5688	22.7648
MSMEG_2983	-1.46307	3.31302	26.4264	26.4027	26.3293	24.8847	25.1787	24.7057
MSMEG_3027	-0.570882	1.89238	22.1145	21.9389	21.8032	21.3868	21.2086	21.5486
MSMEG_3035	0.510462	1.96395	25.9426	26.2513	25.9894	26.4506	26.6381	26.626
MSMEG_3097	-0.885469	1.29734	22.2178	21.905	22.2113	21.5052	20.621	21.5515
MSMEG_3238	0.340476	0.908709	23.2402	23.6092	23.838	23.8971	23.8787	23.933
MSMEG_3434	-1.60511	2.74581	25.5418	25.443	25.4853	24.2364	23.493	23.9252
MSMEG_3491	-1.16777	2.19187	22.8811	22.314	22.8099	21.2882	21.4621	21.7514
MSMEG_3493	-2.36471	3.73244	28.6617	28.2407	28.4694	25.836	26.1863	26.2553
MSMEG_3543	-1.77338	1.77763	24.5314	23.2526	23.2647	22.1837	21.8462	21.6985
MSMEG_3560	-0.955655	1.32244	24.7703	23.8177	23.767	22.9851	23.2342	23.2687
MSMEG_3569	0.277772	1.33303	22.8708	22.923	22.9108	23.0139	23.1767	23.3472
MSMEG_3627	-1.32609	2.71759	25.6425	25.6531	25.7298	24.5766	23.9921	24.4783
MSMEG_3628	0.172478	0.670724	23.7266	23.7209	23.6138	23.6411	24.0005	23.9371
MSMEG_3752	-0.45348	0.80016	22.7311	23.0755	22.6811	21.9648	22.3994	22.763
MSMEG_3904	-0.808165	1.53255	22.4983	21.7671	22.4389	21.2967	21.4992	21.4838
MSMEG_4221	-0.138639	0.45235	22.2173	21.8482	22.1113	21.8119	21.8888	22.0602
MSMEG_4287	-0.641416	2.42869	22.6882	22.4851	22.3724	21.8071	21.8396	21.9748
MSMEG_4483	0.124199	0.475313	21.1053	21.1408	21.4466	21.4193	21.3383	21.3076
MSMEG_4556	-0.552762	2.08394	21.3676	21.7218	21.679	21.0043	21.0297	21.0761
MSMEG_4580	-0.232522	0.92036	24.1739	24.2659	24.3538	23.8447	24.0398	24.2116
MSMEG_4583	-0.546764	0.986263	21.6667	21.8182	21.6422	21.5283	20.6742	21.2844
MSMEG_4631	-1.62945	2.38904	28.1418	28.1058	28.2357	25.995	26.7171	26.883
MSMEG_4650	0.0223866	0.0297491	22.0249	21.6313	21.2423	21.4304	21.8034	21.7319
MSMEG_4666	0.592607	0.59278	21.4836	21.4496	21.259	22.5184	22.3381	21.1136
MSMEG_4713	-0.494963	0.974622	22.0858	21.9074	22.0075	21.7888	21.6823	21.0448
MSMEG_4914	0.207505	0.397996	22.5387	22.8674	23.1891	22.8714	23.2718	23.0746
MSMEG_4934	0.120932	0.20961	23.1437	22.4784	22.9084	22.8672	22.843	23.1831
MSMEG_5021	-0.359551	0.361653	23.5411	22.6158	22.421	22.6219	22.8215	22.0557
MSMEG_5087	0.767416	1.67089	22.5164	22.4978	22.9578	23.7142	23.262	23.2981
MSMEG_5191	-0.500845	1.61468	25.8635	25.6945	25.8457	25.038	25.4174	25.4458
MSMEG_5352	0.667288	2.26001	22.5076	22.6702	22.5917	23.0475	23.2888	23.435
MSMEG_5428	-1.64314	4.4445	26.0222	26.1309	25.993	24.3558	24.3171	24.5437
MSMEG_5452	-0.791634	1.15069	21.9909	21.8308	21.307	20.5664	20.788	21.3993
MSMEG_5536	-0.825496	1.31718	24.3533	24.4502	24.5888	24.1669	23.5616	23.1873
MSMEG_5664	0.768923	1.80473	25.9365	26.1755	25.9784	26.4621	26.8806	27.0544
MSMEG_5666	-1.02679	1.95284	25.3986	25.0703	25.1813	23.7731	24.4255	24.3712
MSMEG_5685	-0.866407	1.39729	21.9513	22.3218	22.6292	21.0179	21.7161	21.5692
MSMEG_5702	-2.02578	2.77098	23.3725	23.1843	23.1296	20.9267	20.9596	21.7228
MSMEG_5722	-1.05542	1.26167	27.8476	26.8131	26.7256	25.8086	26.3483	26.0632
MSMEG_5827	1.62951	1.86461	24.9335	24.1062	24.8128	26.3273	26.7032	25.7106
MSMEG_6039	-0.610732	2.36762	22.7722	22.7083	22.9545	22.0559	22.3007	22.2462
MSMEG_6081	-1.12621	1.91509	23.0365	22.8161	22.3206	21.5325	21.3792	21.8829
MSMEG_6101	-0.892475	3.78234	22.907	22.9331	22.9099	21.895	22.0954	22.0821
MSMEG_6195	-0.426912	1.00531	21.5757	21.1073	21.2928	21.1454	20.6419	20.9076
MSMEG_6280	-2.0794	3.56835	25.9071	25.9819	25.8565	24.1388	23.8114	23.5571
MSMEG_6328	-0.0452143	0.0770635	23.5837	23.7561	24.1167	23.5054	23.9058	23.9097
MSMEG_6354	-1.83309	1.87795	25.1786	24.4903	24.1392	22.2364	22.7764	23.296
MSMEG_6381	-1.01403	2.24817	21.5522	21.6503	21.7912	20.4375	20.5186	20.9955
MSMEG_6407	-1.91132	3.37752	24.9318	24.4404	24.5536	22.5674	22.7228	22.9018
MSMEG_6434	-0.654299	0.849507	23.9324	23.9355	23.8267	23.8615	22.6283	23.2419
MSMEG_6477	2.45687	2.40411	21.2019	22.5401	21.52	24.3512	24.2018	24.0796
MSMEG_6482	-0.580203	1.06433	22.7537	22.4128	22.3023	22.0314	21.4873	22.2095
MSMEG_6579	-1.53302	1.60693	28.2732	27.0483	27.1195	25.6085	26.2358	25.9977
MSMEG_6616	-0.57734	0.663033	23.1751	22.0726	21.971	21.7342	21.7561	21.9964
MSMEG_6913	-1.76804	2.53084	24.96	24.4994	24.7661	22.5512	22.9932	23.377
MSMEG_0077	-2.54566	4.04917	24.3377	24.4971	24.6281	21.6716	22.0818	22.0724
MSMEG_0078	-1.64296	2.8999	22.3059	22.4556	22.4433	20.4237	20.7467	21.1055
MSMEG_0086	-1.33863	3.69348	22.7255	22.8503	22.8193	21.3029	21.4424	21.634
MSMEG_0282	-1.02489	1.08386	25.0572	24.6021	24.1057	23.2884	23.1445	24.2575
MSMEG_0369	0.17216	0.661094	21.7538	21.9158	21.9284	21.929	21.9399	22.2455
MSMEG_0370	-0.894933	1.98167	23.4876	23.1885	22.8093	22.29	22.2686	22.2421
MSMEG_0532	-0.536908	1.3629	22.1267	22.0559	21.9341	21.4699	21.8202	21.2157
MSMEG_0539	-0.497657	1.28432	22.7084	23.1245	22.9765	22.5721	22.5752	22.1691
MSMEG_0559	-1.5407	4.43057	30.4849	30.5203	30.494	28.8218	29.086	28.9693
MSMEG_0741	-2.2787	3.93854	24.7847	24.4216	24.6368	22.5323	22.1541	22.3207
MSMEG_0752	-0.0129941	0.0212096	23.2996	23.0666	22.7299	22.8385	22.9726	23.2461
MSMEG_0828	-1.3712	1.99588	26.5748	26.0712	26.0318	24.3713	25.1215	25.0714
MSMEG_0863	-2.20355	4.87738	24.311	24.1292	24.1399	21.97	21.8945	22.1049
MSMEG_0876	-1.56378	3.69519	23.5475	23.554	23.7712	21.9951	21.9383	22.2479
MSMEG_0894	1.58251	3.46929	20.8825	21.319	21.2001	22.7805	22.7471	22.6215
MSMEG_0901	-1.53697	4.91148	25.5849	25.4682	25.5654	23.9286	23.9929	24.0861
MSMEG_0909	-0.600595	1.58288	23.0183	22.8453	22.9404	22.0839	22.2678	22.6506
MSMEG_0918	-1.08735	2.25281	24.2293	24.0611	24.1374	22.6867	23.1327	23.3464
MSMEG_1108	-1.36716	1.71745	24.2075	23.4908	23.8131	22.596	22.9053	21.9086
MSMEG_1114	0.192301	0.282938	21.4046	20.9722	21.3591	21.0392	21.8593	21.4143
MSMEG_1438	-1.42698	3.78215	28.4951	28.3961	28.2911	26.823	27.1206	26.9577
MSMEG_1441	-0.749329	0.755383	26.9174	27.4278	27.3062	27.1286	26.6119	25.6629
MSMEG_1580	-0.658812	1.00774	22.573	22.1174	21.9828	21.4708	21.1889	22.0371
MSMEG_1637	-2.00852	2.4927	23.8361	23.0987	23.7753	21.4689	21.248	21.9677
MSMEG_1681	0.629375	1.83782	26.5013	26.3804	26.2083	27.2458	26.8728	26.8596
MSMEG_1936	-1.69527	2.22497	23.1704	22.2473	22.9749	21.0238	20.8924	21.3906
MSMEG_1945	-1.70558	2.94193	24.0998	23.7252	23.5355	22.0638	21.8813	22.2987
MSMEG_1946	-0.0559279	0.0822456	22.9285	22.9548	23.1719	22.8446	22.6404	23.4024
MSMEG_1954	-0.635423	0.787906	22.1663	23.1244	21.9692	21.5763	21.9231	21.8542
MSMEG_1961	-1.63135	2.95776	22.6363	22.2475	22.3615	20.4986	20.815	21.0376
MSMEG_2066	0.232375	1.42071	21.1788	21.2578	21.2118	21.364	21.593	21.3884
MSMEG_2117	-0.805229	1.40036	26.2583	25.982	26.0366	24.8951	25.2022	25.764
MSMEG_2174	-1.443	3.6278	21.9898	22.2706	22.0119	20.7778	20.6368	20.5287
MSMEG_2364	-1.25355	2.30375	25.7673	25.3036	25.1157	24.0947	23.9765	24.3547
MSMEG_2397	-0.321242	0.824477	24.2996	24.8883	24.6072	24.3894	24.1806	24.2614
MSMEG_2441	-0.922266	1.93562	22.4377	22.4569	21.8848	21.2642	21.2273	21.5211
MSMEG_2487	1.12915	4.592	21.4694	21.3089	21.3755	22.5219	22.4723	22.5471
MSMEG_2540	-1.08528	1.32008	24.5612	24.4526	24.7561	24.2502	23.0689	23.1949
MSMEG_2594	-0.0863228	0.338144	21.1562	21.1364	20.8904	21.056	21.0147	20.8535
MSMEG_2629	-2.21761	3.47593	26.049	25.8282	26.1022	23.542	23.6665	24.1179
MSMEG_2652	-0.773636	1.79252	22.7994	22.1352	22.4186	21.6584	21.6581	21.716
MSMEG_2700	0.724248	0.660236	24.4844	23.4276	23.0802	23.8702	24.7135	24.5812
MSMEG_2728	-0.486656	1.85941	21.5735	21.7306	21.9394	21.2235	21.2042	21.3558
MSMEG_2762	-0.401886	0.902355	21.6834	22.0869	21.9354	21.2679	21.3979	21.8341
MSMEG_3036	-0.620405	1.28034	25.3598	25.7125	25.3381	24.7212	25.2276	24.6004
MSMEG_3053	-1.85787	2.80543	27.2934	27.555	27.5384	25.1686	25.7091	25.9356
MSMEG_3070	-0.0432542	0.071616	24.3278	24.787	24.6957	24.2513	24.7747	24.6546
MSMEG_3071	-0.277854	0.594681	24.2769	24.0327	23.9656	23.443	23.9685	24.0301
MSMEG_3111	-0.734514	2.41922	24.008	24.0638	24.1	23.512	23.1037	23.3527
MSMEG_3127	-0.364512	0.745279	25.8336	26.1663	25.4398	25.543	25.5123	25.2909
MSMEG_3262	-0.274492	0.525116	22.6043	22.1058	22.1264	21.7171	22.0171	22.2788
MSMEG_3304	0.0647939	0.111762	22.9104	22.7285	22.7021	22.446	23.0405	23.0487
MSMEG_3309	1.99168	5.03218	23.0984	23.1542	23.3102	25.1927	25.1208	25.2243
MSMEG_3347	-0.322552	0.374601	22.0081	21.0074	21.1993	20.8603	21.4615	20.9254
MSMEG_3489	-0.953358	2.88414	24.3081	24.135	24.2509	23.3716	23.064	23.3983
MSMEG_3540	-2.09714	3.0434	26.1949	25.9688	26.3484	23.6711	24.3795	24.17
MSMEG_3685	-1.25786	2.48238	24.0643	23.5112	23.4305	22.4024	22.3766	22.4534
MSMEG_3733	-2.11709	2.9476	27.9896	27.4025	27.5486	25.1705	25.6548	25.764
MSMEG_3888	0.59101	1.45367	21.8847	22.106	22.4943	22.8152	22.6277	22.8152
MSMEG_3906	1.45345	4.38512	22.3361	22.459	22.4998	23.8811	23.9844	23.7897
MSMEG_4176	-0.340334	0.663499	22.6585	22.3165	21.9301	21.7689	22.019	22.0963
MSMEG_4242	1.50586	1.58651	21.9239	23.0481	22.3426	23.3719	24.1961	24.2642
MSMEG_4244	-0.858133	2.69591	22.8211	22.7163	23.057	21.9741	21.9141	22.1319
MSMEG_4258	-0.619882	1.88109	21.9397	22.1127	22.2338	21.3262	21.709	21.3913
MSMEG_4342	-0.686604	1.62379	26.6106	26.1265	26.1152	25.5047	25.4835	25.8042
MSMEG_4396	-0.7407	2.07695	23.9356	23.6622	23.7807	23.0928	23.2557	22.808
MSMEG_4401	-0.427782	0.672399	26.3033	26.8539	26.3588	25.9062	25.7941	26.5323
MSMEG_4530	-0.999203	3.04075	22.3152	22.404	22.2155	21.1385	21.3162	21.4824
MSMEG_4568	-0.309948	0.644117	23.1226	22.6021	22.507	22.2414	22.4668	22.5937
MSMEG_4647	-1.03528	1.60803	22.6395	22.0681	22.2096	21.0583	21.0043	21.7488
MSMEG_4652	-0.128548	0.155398	20.855	21.6567	21.489	21.4	21.3904	20.8246
MSMEG_4707	1.10506	1.59993	22.3385	22.1188	21.4554	23.103	23.3605	22.7643
MSMEG_4826	0.988288	3.09894	21.3287	21.574	21.5461	22.6162	22.3626	22.435
MSMEG_4833	-0.0722326	0.123855	23.1777	22.6456	22.5236	22.6288	22.648	22.8533
MSMEG_4899	-1.81515	3.87308	24.4468	24.3169	24.4028	22.3888	22.534	22.7982
MSMEG_4955	0.0359929	0.0919118	24.1234	24.3425	23.9108	24.0397	24.1957	24.2493
MSMEG_4977	0.0078729	0.0180654	23.4468	23.7795	23.3434	23.414	23.6167	23.5626
MSMEG_5016	-1.71347	3.09621	26.2554	25.9817	26.3378	24.6527	24.6105	24.1712
MSMEG_5053	-0.774563	1.29319	23.2638	22.456	22.7387	21.9685	21.8301	22.3363
MSMEG_5058	-1.27507	4.15519	24.1514	24.1123	24.2761	22.793	22.9493	22.9724
MSMEG_5209	-0.585194	1.42012	22.4165	22.5169	22.4785	21.5094	22.0309	22.1159
MSMEG_5225	-1.07322	2.84262	26.9773	26.9552	26.8858	26.0297	25.9689	25.5999
MSMEG_5401	-0.407228	0.816147	22.072	22.3945	21.688	21.8343	21.4603	21.6382
MSMEG_5431	1.28923	1.77574	25.4271	26.3334	26.2407	26.9885	27.3924	27.488
MSMEG_5479	-1.84922	2.67339	25.033	25.3149	25.7516	23.2626	23.4836	23.8058
MSMEG_5612	1.22061	2.43415	23.1573	22.901	23.4227	24.6415	24.21	24.2914
MSMEG_5614	0.722478	1.55617	22.2157	22.5212	22.1231	22.729	23.3358	22.9626
MSMEG_5662	-0.980016	3.16016	23.9314	23.9833	23.7289	23.0132	22.913	22.7774
MSMEG_5691	-1.12259	2.43618	24.3672	24.1894	24.0909	22.8838	23.4198	22.9761
MSMEG_5696	-1.20381	3.11173	27.3813	27.3364	27.3462	25.9207	26.1609	26.3708
MSMEG_5831	-0.695372	1.61872	23.4447	23.8103	23.9457	22.8594	22.9703	23.2849
MSMEG_5941	-0.299504	1.50948	21.8565	22.0163	21.9894	21.6001	21.5565	21.8071
MSMEG_6001	0.195093	0.892255	21.6785	21.7843	21.9116	21.8568	22.1216	21.9814
MSMEG_6036	1.87452	2.59791	20.7639	21.2579	21.6644	22.911	23.1689	23.2298
MSMEG_6076	-1.76778	2.5085	24.3772	24.6798	24.7697	22.9108	23.2358	22.3766
MSMEG_6098	-0.786671	1.51565	22.1202	22.8556	22.1802	21.6266	21.6572	21.5122
MSMEG_6159	-0.401615	0.711236	29.87	30.4247	30.6413	29.6777	30.0527	30.0007
MSMEG_6292	-0.401512	0.768379	22.7645	22.8644	22.7628	21.9691	22.4253	22.7927
MSMEG_6439	-1.17743	1.77306	27.925	27.4416	27.6625	25.9823	26.6663	26.8482
MSMEG_6483	-0.344948	0.500185	22.6684	22.4136	22.4552	21.6888	22.1207	22.6928
MSMEG_6502	-0.512947	1.4519	24.8646	24.8129	24.9162	24.6678	24.1375	24.2495
MSMEG_6595	-0.561268	1.97972	23.7472	23.6085	23.7425	22.9121	23.2155	23.2869
MSMEG_6730	0.0785344	0.16171	22.5534	22.0915	22.149	22.1865	22.287	22.5561
MSMEG_6791	0.318424	1.23187	21.3333	21.1443	20.9871	21.516	21.3388	21.5651
MSMEG_6892	-0.219692	0.758484	22.2764	22.1114	22.1913	21.7427	22.0079	22.1693
MSMEG_6934	-1.69444	4.40005	28.3839	28.127	28.2965	26.5203	26.6576	26.5462
MSMEG_0085	-2.47558	4.80783	24.6803	24.645	24.928	22.2359	22.2259	22.3648
MSMEG_0093	-0.437031	0.627261	25.1153	25.6495	25.7491	24.8926	24.7602	25.55
MSMEG_0097	-0.577091	1.92338	22.5841	22.7713	22.4515	21.9435	21.9198	22.2123
MSMEG_0100	-1.4102	4.02029	24.5822	24.6624	24.826	23.2557	23.2014	23.3828
MSMEG_0146	-1.17429	3.01042	25.1248	24.8847	24.7821	23.6672	23.6658	23.9358
MSMEG_0187	0.113368	0.16193	23.3826	23.2169	22.8108	23.0134	23.0873	23.6498
MSMEG_0194	-1.40049	2.70786	26.393	26.1345	26.3327	24.5313	25.045	25.0824
MSMEG_0212	-0.774452	1.80681	25.1862	24.5979	24.7163	23.9265	24.1402	24.1103
MSMEG_0252	-1.02664	1.92132	22.8263	23.366	23.5145	22.4228	22.1178	22.0862
MSMEG_0261	1.63282	3.47063	22.2045	22.3667	22.6003	23.9349	23.9405	24.1947
MSMEG_0312	-0.855014	1.03429	23.0288	23.7631	23.6103	22.6317	23.1521	22.0534
MSMEG_0443	0.0369256	0.0752234	21.9464	22.2961	22.3688	22.037	22.258	22.427
MSMEG_0451	-2.56809	2.50506	29.1416	27.8738	28.1601	25.5868	25.8765	26.008
MSMEG_0456	-0.322173	0.313413	22.7306	22.7994	23.1941	21.797	22.9969	22.9637
MSMEG_0628	0.52844	1.71278	22.2758	22.2454	22.5183	22.6643	23.0339	22.9266
MSMEG_0753	-0.903619	1.52877	23.303	22.7119	22.7211	22.1693	21.6293	22.2265
MSMEG_0806	-0.827278	1.86166	22.9087	22.8021	22.7684	22.1607	21.6154	22.2212
MSMEG_0928	0.752743	2.49242	21.3453	21.2054	21.5799	22.1889	22.1648	22.0352
MSMEG_0948	-0.129616	0.803275	23.6533	23.4392	23.449	23.4279	23.388	23.3367
MSMEG_1001	-0.588071	0.338245	23.4519	23.4725	22.8667	24.0476	22.1234	21.8559
MSMEG_1215	-0.462503	1.57246	23.9032	23.6082	23.8031	23.1717	23.2426	23.5126
MSMEG_1340	-0.0948397	0.27595	23.9832	23.9751	23.8172	23.7849	24.0695	23.6367
MSMEG_1346	-1.38028	3.88216	28.5278	28.5364	28.4979	26.9749	27.1445	27.3018
MSMEG_1474	0.368355	0.356179	27.4864	27.2148	27.0412	28.4055	27.4154	27.0265
MSMEG_1485	-0.731922	1.01359	22.8726	23.4615	23.945	22.4251	22.7881	22.8702
MSMEG_1529	-3.54521	5.28736	24.9555	25.1896	25.2826	21.6593	21.5048	21.6279
MSMEG_1544	0.128624	0.180523	25.8031	25.8295	25.237	26.0487	25.8091	25.3976
MSMEG_1556	0.841279	0.97293	25.1801	25.1005	25.1743	26.6488	26.0745	25.2554
MSMEG_1701	0.30508	0.782981	23.7353	24.1078	23.7791	23.9257	24.3911	24.2207
MSMEG_1770	-1.98082	1.82096	28.8815	27.9693	27.5243	26.6232	25.6672	26.1423
MSMEG_1804	-1.05215	2.42226	25.7777	25.403	25.2676	24.3672	24.3278	24.5969
MSMEG_1937	-0.119225	0.304723	21.7224	22.232	22.1518	21.9524	21.9046	21.8916
MSMEG_1977	0.18003	0.250756	22.6578	22.1326	21.8356	22.1492	22.6717	22.3453
MSMEG_2027	-0.824063	1.45111	26.9237	26.4626	26.499	25.3722	26.0747	25.9662
MSMEG_2029	-0.534442	1.02719	22.1797	22.3236	22.6052	21.4687	21.8408	22.1957
MSMEG_2083	-0.993094	2.28447	24.0707	23.7462	23.8705	22.6501	22.8814	23.1766
MSMEG_2111	-2.10763	3.4082	26.793	26.2623	26.2635	24.1834	24.3905	24.4219
MSMEG_2112	0.0154152	0.0137951	24.6568	23.598	23.6775	24.0522	23.7191	24.2072
MSMEG_2350	-0.770648	2.06388	22.8537	22.757	23.0768	21.8669	22.2724	22.2362
MSMEG_2353	-0.965237	1.98475	23.5429	23.0878	23.4241	22.0642	22.5154	22.5795
MSMEG_2375	-0.251191	0.674454	22.4798	22.4489	22.5569	22.3551	22.4594	21.9174
MSMEG_2382	-0.0882168	0.147864	25.2753	25.7208	25.9006	25.3224	25.741	25.5687
MSMEG_2418	0.677706	1.35756	24.196	23.7287	23.5852	24.229	24.6422	24.6717
MSMEG_2424	-0.440813	1.11275	22.7004	22.6605	22.6526	22.0507	22.0386	22.6017
MSMEG_2451	0.652607	1.10276	22.8537	23.1871	23.4344	23.4183	24.1855	23.8293
MSMEG_2511	1.55611	2.44151	23.8028	24.6401	24.1446	25.8285	25.8257	25.6017
MSMEG_2587	-0.432644	0.246468	27.524	25.2514	25.7511	25.5834	25.7969	25.8482
MSMEG_2769	0.648499	2.10736	23.3235	23.286	23.6594	24.0242	24.0072	24.183
MSMEG_2963	-0.808769	1.40009	22.5714	22.5182	21.8351	21.2847	21.4871	21.7266
MSMEG_3064	-0.732218	1.83154	23.2828	22.9622	23.1476	22.0993	22.5022	22.5944
MSMEG_3066	0.269953	1.02562	25.3161	25.525	25.2357	25.4559	25.6826	25.7481
MSMEG_3073	-0.835396	2.58964	26.0184	26.1875	26.2825	25.1843	25.2837	25.5143
MSMEG_3112	-0.159341	0.335376	23.493	23.4962	23.2936	23.192	22.9942	23.6186
MSMEG_3144	-0.512674	1.45485	23.7969	23.6128	23.4549	23.1805	22.8558	23.2902
MSMEG_3152	1.27633	2.41564	22.6849	22.8152	23.2963	24.0535	24.4009	24.1709
MSMEG_3155	-1.09074	3.59496	23.3312	23.2177	23.1372	22.0986	22.0432	22.272
MSMEG_3220	-0.655425	2.81589	23.266	23.0049	23.0339	22.4103	22.4478	22.4804
MSMEG_3259	-1.18723	3.2679	21.8663	22.1405	21.8557	20.8692	20.6293	20.8024
MSMEG_3265	0.720703	2.77723	23.3999	23.4009	23.2125	23.9359	24.1867	24.0528
MSMEG_3308	-1.31642	3.08339	24.8585	24.615	24.72	23.1785	23.4514	23.6145
MSMEG_3380	-0.464263	1.24671	23.9507	23.5852	23.4784	23.3957	23.1737	23.0522
MSMEG_3422	0.535323	2.01645	23.4584	23.7074	23.3562	24.1173	23.9516	24.059
MSMEG_3602	-1.68053	1.82018	21.8594	22.1782	23.2006	20.5898	20.7451	20.8617
MSMEG_3607	-0.989264	2.35435	21.9937	22.278	22.3705	21.3273	20.9707	21.3764
MSMEG_3626	-1.90381	3.54086	26.7038	26.229	26.5871	24.4751	24.6064	24.727
MSMEG_3745	0.694228	1.72988	22.4544	22.7728	22.8664	23.2917	23.2317	23.6529
MSMEG_3754	-1.4168	2.53393	24.5256	24.2827	24.2671	22.58	22.9665	23.2785
MSMEG_3771	-1.535	3.25641	24.8308	24.4839	24.6011	23.0231	22.959	23.3287
MSMEG_3791	0.519081	0.309591	26.9465	28.4582	27.9715	29.0657	28.5516	27.3162
MSMEG_3795	-1.74621	2.84217	26.0301	25.5749	25.7526	23.6808	24.2102	24.228
MSMEG_3896	-0.618486	0.774378	26.4948	26.1939	25.5507	24.9978	25.8052	25.5809
MSMEG_3898	-0.887234	1.493	22.0023	22.89	22.5732	21.7313	21.6461	21.4265
MSMEG_4193	-0.325277	1.77479	24.9944	24.9761	24.8319	24.4934	24.7157	24.6175
MSMEG_4256	-2.05957	5.63497	25.4888	25.4119	25.4446	23.3077	23.4681	23.3907
MSMEG_4309	0.950029	1.81247	22.718	23.132	22.719	23.4292	24.0248	23.9651
MSMEG_4320	-1.26039	2.05176	24.4234	23.7326	23.8158	22.4348	22.83	22.9258
MSMEG_4321	0.589151	2.62131	25.2817	25.1839	25.1264	25.6419	25.8794	25.8381
MSMEG_4329	-0.712385	1.4649	22.7765	22.5722	22.9765	22.4456	21.8272	21.9152
MSMEG_4337	0.786864	1.57185	23.1881	23.7805	23.8445	24.4785	24.1987	24.4964
MSMEG_4454	0.540389	0.810186	22.684	23.1792	23.0504	23.542	23.9643	23.0284
MSMEG_4497	-0.375079	0.602907	22.8904	23.1947	22.3679	22.1987	22.6805	22.4485
MSMEG_4598	-0.943368	1.97753	22.9346	23.0585	22.4821	21.7066	21.848	22.0906
MSMEG_4624	-1.7532	3.58903	27.4425	27.4594	27.5688	25.4621	25.8937	25.8553
MSMEG_4681	-0.389189	0.580602	23.4616	22.9963	22.5423	22.6809	22.346	22.8059
MSMEG_4906	-1.74826	3.37591	28.6649	28.5158	28.7433	26.6505	26.8677	27.161
MSMEG_4940	-0.678691	2.15037	26.2777	25.9944	25.9709	25.4077	25.2436	25.5557
MSMEG_5006	-1.07177	1.99393	25.4311	25.0181	25.2376	23.7552	24.3546	24.3617
MSMEG_5015	-1.3712	3.90285	23.6505	23.4616	23.5342	22.0461	22.1794	22.3074
MSMEG_5029	-0.789675	2.40401	23.564	23.4081	23.3306	22.5211	22.8702	22.5424
MSMEG_5064	0.694786	0.972344	22.2847	22.8534	23.0512	23.8866	23.3269	23.0602
MSMEG_5081	-2.4918	4.29955	29.96	29.5509	29.904	27.3724	27.3342	27.233
MSMEG_5130	-0.651123	2.40878	21.2027	21.1367	21.1761	20.6648	20.5855	20.3117
MSMEG_5224	0.303029	1.04609	23.9469	24.1384	23.6724	24.2146	24.2516	24.2005
MSMEG_5245	-1.50662	1.48857	22.531	22.59	21.6408	20.3276	21.4515	20.4628
MSMEG_5343	-2.20351	2.29776	27.8282	26.7273	26.9593	24.6427	25.3558	24.9057
MSMEG_5478	-0.408355	1.19099	22.8662	22.7534	22.4572	22.189	22.4943	22.1685
MSMEG_5485	0.261104	0.502074	25.305	25.2886	25.1455	25.1279	25.499	25.8954
MSMEG_5695	1.23611	2.34359	21.598	22.0003	22.2784	23.3566	23.1587	23.0697
MSMEG_5792	-0.243032	0.680537	24.7322	24.8587	24.6625	24.2139	24.5903	24.7201
MSMEG_5834	-0.602886	1.43689	26.3276	25.8505	25.8451	25.1875	25.4687	25.5584
MSMEG_5837	-1.55735	3.1799	28.5115	28.125	28.3496	26.5364	26.882	26.8956
MSMEG_5859	0.241655	0.427214	22.2838	22.1178	21.5106	22.2946	22.2379	22.1047
MSMEG_5884	-1.44978	2.66105	23.2346	23.0563	23.0473	21.4356	21.4965	22.0567
MSMEG_5903	-0.980836	3.05916	24.7078	24.4915	24.3701	23.6377	23.4817	23.5075
MSMEG_6002	1.35076	2.75387	21.2562	21.4778	21.7537	22.8764	22.6403	23.0233
MSMEG_6073	-0.437891	1.16008	23.0613	23.0569	22.8686	22.2666	22.8406	22.5659
MSMEG_6097	-1.26601	3.89734	23.606	23.4457	23.5228	22.4011	22.1591	22.2162
MSMEG_6127	-0.0232582	0.0346209	27.0212	27.4592	27.5442	27.0088	27.4082	27.5378
MSMEG_6319	-1.28966	2.1374	22.722	21.9242	22.4142	21.0544	20.8826	21.2544
MSMEG_6403	-0.271273	0.861235	22.1002	22.1526	22.079	21.9855	21.9828	21.5497
MSMEG_6427	3.02357	3.81153	26.6188	26.9887	27.2732	30.0454	29.777	30.1289
MSMEG_6596	-0.223774	0.292034	23.193	24.1808	23.937	23.3705	23.6122	23.6567
MSMEG_6636	1.92068	2.29928	24.9182	24.5663	25.7109	27.0814	26.8791	26.9969
MSMEG_6663	0.384274	0.683973	22.538	23.0008	22.4326	22.6684	23.2172	23.2387
MSMEG_6733	1.16089	2.65305	22.3006	22.7206	22.6688	23.5247	23.7953	23.8526
MSMEG_6747	-0.484147	1.21961	22.6088	22.5206	22.8462	21.9149	22.4638	22.1444
MSMEG_6875	1.55859	2.81257	22.3963	22.6616	22.113	23.705	24.0121	24.1294
MSMEG_0114	-0.894789	2.80189	24.0082	24.0815	24.2271	23.3008	23.0152	23.3164
MSMEG_0215	-0.222083	0.501419	24.5548	24.1071	24.1526	23.8415	24.0146	24.2921
MSMEG_0238	0.959482	1.82809	23.6449	23.7498	23.8697	25.0449	24.813	24.285
MSMEG_0243	-2.32557	3.4706	31.2412	30.7422	31.0219	28.3878	28.816	28.8249
MSMEG_0301	0.586562	1.92325	22.5164	22.4729	22.8699	23.2932	23.1923	23.1334
MSMEG_0366	-0.917028	2.23273	25.3173	25.0293	25.1333	24.0734	24.5399	24.1155
MSMEG_0388	-0.51746	1.52086	23.1147	23.3272	22.8292	22.661	22.6052	22.4524
MSMEG_0629	0.736973	4.43174	22.5177	22.3935	22.4404	23.1777	23.201	23.1837
MSMEG_0636	-0.783286	1.79987	26.0653	25.7079	25.6905	24.801	24.9921	25.3208
MSMEG_0754	-1.62378	2.81665	27.7371	27.2094	27.4672	25.8352	26.1054	25.6018
MSMEG_0825	0.980371	2.34069	25.1066	25.6511	25.5671	26.4672	26.3944	26.4044
MSMEG_0978	1.37695	1.41196	21.6352	22.8159	23.1107	23.7896	23.928	23.975
MSMEG_0983	-0.513121	2.53885	22.2684	22.2805	22.2918	21.9178	21.6527	21.7308
MSMEG_1417	-0.473565	0.863389	23.3476	22.7254	22.5945	22.5197	22.2048	22.5223
MSMEG_1442	0.0198352	0.017668	25.3244	25.3533	25.6606	26.1742	25.1914	25.0322
MSMEG_1466	-1.47344	3.62183	28.2755	28.5704	28.5708	27.0422	27.0845	26.8697
MSMEG_1467	-0.397075	0.787457	26.1399	26.2006	26.4012	26.2721	25.538	25.7404
MSMEG_1471	-1.25821	3.91166	29.4293	29.455	29.3608	28.1954	28.2728	28.0022
MSMEG_1496	0.224546	0.405026	22.8073	23.1161	22.6909	23.2626	22.7018	23.3236
MSMEG_1575	0.964037	2.01925	20.916	21.5349	21.4071	22.1215	22.219	22.4095
MSMEG_1675	0.102539	0.321141	22.4756	22.7006	22.5435	22.4525	22.8144	22.7604
MSMEG_1680	-0.297743	0.629957	26.4361	26.3382	25.9239	26.0172	26.1325	25.6553
MSMEG_1703	0.915237	1.75766	23.3944	22.7895	23.5008	24.025	24.2869	24.1185
MSMEG_1794	3.29976	3.90036	21.5958	21.8545	21.2958	24.6417	25.1764	24.8272
MSMEG_1823	0.60427	1.56138	22.9656	22.8332	23.0838	23.6534	23.7923	23.2498
MSMEG_1824	-0.924277	4.60268	23.2823	23.1906	23.2181	22.2662	22.283	22.3691
MSMEG_1891	-1.36627	3.89815	23.6855	23.7322	23.6387	22.1406	22.4099	22.407
MSMEG_1996	1.74083	2.03289	22.5482	23.1214	23.607	24.9576	25.1143	24.4272
MSMEG_2045	0.617393	3.50871	22.9862	22.955	22.924	23.6552	23.5791	23.483
MSMEG_2072	0.52224	1.22138	21.8471	22.5221	22.1313	22.6094	22.7668	22.6911
MSMEG_2092	-0.660673	1.98232	25.0231	24.6318	24.6617	24.2356	24.1148	23.9842
MSMEG_2119	-0.526832	1.47824	23.5686	23.2063	23.0973	22.5968	22.854	22.8409
MSMEG_2122	-1.87483	3.09083	23.6608	23.8316	23.96	22.1117	21.569	22.1473
MSMEG_2163	0.456558	2.64637	23.6866	23.5483	23.6426	24.0148	24.0488	24.1836
MSMEG_2224	0.354103	1.86823	21.9716	22.0923	22.1507	22.4108	22.5457	22.3205
MSMEG_2426	0.655596	1.61233	25.441	25.8747	25.6888	26.1778	26.1952	26.5983
MSMEG_2436	-1.12562	3.22155	27.6716	27.3042	27.6148	26.398	26.3944	26.4214
MSMEG_2488	0.331556	2.07469	21.5121	21.2955	21.4074	21.7588	21.6809	21.77
MSMEG_2593	-1.4327	2.43872	23.1232	22.7018	22.7429	21.1356	21.3454	21.7888
MSMEG_2614	1.00842	2.80872	21.7689	21.8888	22.2039	22.9906	22.976	22.9204
MSMEG_2622	-1.19513	2.84904	25.2144	24.8276	24.7427	23.6829	23.8234	23.693
MSMEG_2654	-0.197639	0.197273	27.3802	28.5418	28.277	28.0833	27.9614	27.5614
MSMEG_2669	-0.234815	0.572076	26.8168	26.384	26.322	26.0908	26.4142	26.3134
MSMEG_2974	-1.22505	3.87174	27.6003	27.4184	27.3745	26.1479	26.3174	26.2528
MSMEG_3000	-1.3374	2.91579	25.186	25.151	25.2534	23.5446	23.9611	24.0724
MSMEG_3003	-1.26867	2.66069	24.0972	23.8514	23.8869	22.9652	22.3973	22.6669
MSMEG_3046	-0.611681	1.9387	23.9965	23.6768	24.067	23.2099	23.2588	23.4366
MSMEG_3081	-0.688395	3.32967	23.6533	23.5931	23.5286	22.874	23.0096	22.8262
MSMEG_3094	0.499432	1.67775	22.5218	22.7312	22.8201	23.2646	23.3188	22.9881
MSMEG_3188	0.584361	2.81218	21.7318	21.6315	21.6285	22.3161	22.3166	22.1123
MSMEG_3201	0.0844892	0.259122	23.7254	23.8733	24.1335	24.0931	23.9202	23.9725
MSMEG_3226	0.115124	0.198389	22.5041	22.7086	21.9675	22.5409	22.4447	22.54
MSMEG_3261	-0.0469297	0.134796	24.0882	24.0637	23.7548	23.788	23.9513	24.0267
MSMEG_3492	0.0656306	0.125088	22.2306	22.548	22.6215	22.2824	22.5137	22.801
MSMEG_3512	-0.0499929	0.0884061	22.6245	22.7476	22.7238	22.5388	22.3751	23.032
MSMEG_3513	1.89166	2.39538	21.4414	22.0438	22.5058	23.9058	23.7425	24.0177
MSMEG_3532	-0.228663	0.243899	23.0003	23.3101	22.5243	22.9004	22.1454	23.103
MSMEG_3564	0.854072	0.893293	25.8155	24.4286	24.6098	25.6175	25.8641	25.9346
MSMEG_3595	-1.11314	4.34624	24.4367	24.3681	24.5235	23.3811	23.2567	23.3511
MSMEG_3623	-0.0361271	0.172824	23.7982	23.9831	23.8621	23.8432	23.7461	23.9457
MSMEG_3793	-0.94354	2.86841	27.3326	27.3639	27.2837	26.1658	26.42	26.5637
MSMEG_3829	-1.497	3.24041	24.7166	24.5011	24.5347	22.8217	23.2616	23.1782
MSMEG_4240	-0.410436	1.27099	24.0624	24.4229	24.5637	23.8891	23.9527	23.9759
MSMEG_4326	-0.32207	1.38657	30.2156	30.0602	30.2529	29.8154	30.0274	29.7197
MSMEG_4476	-1.71395	3.23506	27.1866	26.8338	27.0395	25.0465	25.5242	25.3472
MSMEG_4504	-0.898241	2.26699	24.0161	23.9498	24.0479	22.9458	22.944	23.4292
MSMEG_4528	-1.13869	2.68161	26.0813	25.9655	26.2133	24.7076	24.9322	25.2042
MSMEG_4553	-1.76485	3.04146	27.5447	27.0396	27.0422	25.3165	25.3556	25.6598
MSMEG_4589	0.971564	1.62069	21.3819	22.0106	22.1805	22.5748	22.963	22.9499
MSMEG_4645	-1.33552	2.97435	24.4109	24.0016	24.0648	22.8158	22.6668	22.9882
MSMEG_4688	0.51031	2.61718	25.4323	25.3813	25.5135	26.0766	25.9196	25.8619
MSMEG_4692	-1.45729	3.4899	28.8275	28.8886	28.9145	27.2425	27.3583	27.6579
MSMEG_4753	-1.40814	2.16806	26.1056	25.7495	25.8594	23.991	24.7606	24.7385
MSMEG_4832	0.493558	1.76666	22.3284	22.2871	22.6152	22.931	23.0121	22.7683
MSMEG_4907	-0.0596485	0.0698785	26.3849	25.7616	25.5252	25.5252	25.9784	25.9891
MSMEG_4908	-1.12802	2.05015	25.2808	24.6054	24.8697	23.5272	23.8971	23.9475
MSMEG_4935	0.612164	1.25218	26.3658	27.0304	26.7437	27.1297	27.2888	27.558
MSMEG_5086	-1.28026	2.85628	23.2774	23.0751	23.4874	22.1913	21.8098	21.998
MSMEG_5185	-0.141125	0.2876	22.5946	22.6565	22.3819	22.052	22.6461	22.5115
MSMEG_5291	0.546283	1.56061	22.1715	22.6034	22.6715	23.0968	22.9654	23.0231
MSMEG_5412	-1.33857	2.74735	30.7949	30.6739	30.9316	29.1353	29.58	29.6694
MSMEG_5414	-2.11002	4.34318	25.133	24.8137	24.8124	22.8421	22.8399	22.7469
MSMEG_5521	-0.533115	1.20223	22.8048	22.8496	22.2801	21.9124	22.1956	22.2272
MSMEG_5629	-0.639384	1.63609	22.4082	22.136	22.3923	21.5524	21.4852	21.9806
MSMEG_5635	-1.15782	1.93429	27.0985	26.8304	27.686	25.918	26.1675	26.0559
MSMEG_5687	1.37598	2.26883	21.0651	21.523	21.9039	22.8058	23.0022	22.8119
MSMEG_5706	-0.608673	1.61938	22.75	22.383	22.497	22.1271	21.6783	21.9986
MSMEG_5717	0.0354837	0.0439691	26.1597	25.4951	25.3074	25.5977	25.8794	25.5916
MSMEG_5732	-0.224451	0.307482	23.7466	23.6629	23.4677	22.8412	23.7808	23.5819
MSMEG_5790	-1.2488	3.34932	31.4668	31.3914	31.546	30.0016	30.3202	30.3361
MSMEG_5796	-0.190171	0.327333	24.9392	24.7679	24.5405	24.1832	24.5878	24.9061
MSMEG_5866	0.662522	2.1212	22.7139	22.7304	22.667	23.6178	23.174	23.3069
MSMEG_5871	0.49011	1.02682	26.6747	26.6006	26.5455	26.6637	27.2386	27.3888
MSMEG_5892	1.58439	1.45907	21.0279	21.2959	22.2037	23.5025	23.3962	22.382
MSMEG_5914	-0.250068	0.693533	21.6712	21.7389	21.9589	21.8168	21.4275	21.3746
MSMEG_6021	0.43212	0.649069	22.2353	21.4944	21.8786	22.604	21.8939	22.4067
MSMEG_6082	-0.476313	1.73864	25.0616	24.9383	25.0225	24.5032	24.3419	24.7483
MSMEG_6114	0.462409	0.68986	26.7091	26.6081	25.7638	26.8085	26.9283	26.7314
MSMEG_6129	-0.778899	1.31321	25.9477	25.4179	25.1808	24.4859	24.6881	25.0357
MSMEG_6203	0.988687	4.56724	22.44	22.3414	22.3758	23.4324	23.3809	23.3101
MSMEG_6215	0.170431	0.387236	22.6751	23.01	23.0982	22.9325	23.0002	23.3619
MSMEG_6235	0.4136	0.962659	25.2512	24.9695	24.9143	25.1201	25.5743	25.6814
MSMEG_6284	-0.954308	2.01328	24.3899	24.2011	24.5908	23.782	23.2407	23.2961
MSMEG_6305	-1.3102	1.37718	25.9758	24.7483	24.7461	23.7381	24.1831	23.6185
MSMEG_6329	2.30478	2.44447	24.477	24.6637	23.6553	26.1519	26.7058	26.8527
MSMEG_6337	-0.584656	1.90366	23.6099	23.6341	23.8354	23.1952	22.8805	23.2497
MSMEG_6352	0.396802	1.94557	24.7957	24.7586	25.0324	25.2093	25.2905	25.2772
MSMEG_6454	0.844083	1.87619	22.1952	22.5985	22.6181	23.1674	23.6024	23.1743
MSMEG_6471	-0.0778548	0.634905	22.2087	22.3306	22.2235	22.1037	22.2407	22.1848
MSMEG_6524	-0.733817	1.96469	24.2817	23.9862	23.879	23.4827	23.1076	23.3553
MSMEG_6630	-0.145976	0.250502	25.5352	25.0066	24.8965	24.7619	25.0895	25.149
MSMEG_6787	-0.453096	0.863163	25.9382	25.213	25.282	24.9454	24.9464	25.1821
MSMEG_0002	2.03165	4.30287	24.3357	24.3496	24.2585	26.1353	26.4366	26.4669
MSMEG_0020	-0.553118	1.80624	24.5904	24.1431	24.3903	23.866	23.7314	23.867
MSMEG_0087	-1.56144	2.9491	24.0283	23.9954	24.4406	22.3539	22.6942	22.7319
MSMEG_0095	0.129946	0.250803	23.9171	24.0069	24.0657	23.7564	24.1765	24.4466
MSMEG_0096	-0.775871	1.63576	23.324	23.4816	23.5938	22.3076	22.7706	22.9935
MSMEG_0441	-0.529139	1.11993	24.1034	23.8484	24.0719	23.1059	23.5087	23.8217
MSMEG_0457	-0.662608	1.45901	23.2268	22.577	22.7879	22.0363	22.2285	22.3389
MSMEG_0580	1.86228	2.97107	22.6991	22.2575	22.6429	24.1113	24.3732	24.7018
MSMEG_0603	-0.202497	0.514926	22.2447	22.2431	22.6329	22.3297	21.9505	22.2329
MSMEG_0640	-0.795106	2.36646	23.999	23.6883	24.0224	22.9441	23.163	23.2173
MSMEG_0645	1.38246	2.70463	24.3036	24.864	24.3548	25.7502	25.9646	25.955
MSMEG_0768	0.0334269	0.0490608	27.236	27.0373	26.6604	26.6886	27.1892	27.1561
MSMEG_0784	1.70623	3.12022	21.7309	22.2904	22.264	23.7614	23.7879	23.8547
MSMEG_0793	-1.10204	2.70632	26.8129	26.535	26.6839	25.3149	25.7057	25.7052
MSMEG_0930	1.67761	2.94295	23.3728	23.7746	23.9842	25.5473	25.2283	25.3889
MSMEG_0937	-0.650656	1.61797	25.3068	25.4253	25.3735	24.3637	24.8322	24.9578
MSMEG_1109	1.31702	4.17708	22.9065	22.729	22.7096	24.0145	24.1614	24.1202
MSMEG_1112	0.306717	0.396137	23.031	22.1271	22.1039	22.9256	22.5176	22.7388
MSMEG_1255	0.149744	0.194096	21.4407	21.5283	21.7735	22.288	21.4419	21.4617
MSMEG_1383	-0.770938	1.40828	24.7682	24.4165	24.4475	23.3533	23.8249	24.1412
MSMEG_1435	-1.86643	5.24208	28.4633	28.386	28.5502	26.5468	26.6636	26.5898
MSMEG_1437	0.0849965	0.100965	26.7671	27.6973	27.537	27.2298	27.4995	27.5271
MSMEG_1445	-1.60517	3.66632	28.2608	27.9945	28.1845	26.7273	26.3979	26.4991
MSMEG_1469	0.378059	0.558569	24.5771	25.0623	25.2056	25.7557	25.2652	24.9582
MSMEG_1475	0.832034	1.75325	23.3835	23.3461	23.5662	24.6125	23.9106	24.2688
MSMEG_1559	-1.50141	2.38511	23.7734	23.7491	23.7832	22.7574	21.9058	22.1383
MSMEG_1661	-1.36162	2.07018	23.8272	23.0847	23.4183	21.7156	22.2833	22.2465
MSMEG_1679	-0.252135	0.599858	24.4782	24.0874	23.878	23.7769	24.008	23.9023
MSMEG_1682	0.866107	1.10927	23.8783	23.8136	23.9546	25.4097	24.6848	24.1504
MSMEG_1822	-0.923386	1.64499	24.8312	24.8084	24.6891	23.7851	23.4538	24.3198
MSMEG_1884	-1.47108	4.04756	25.3061	25.1304	25.2022	23.5931	23.7841	23.8482
MSMEG_1934	-1.15926	3.43679	29.0504	28.7612	28.8553	27.7005	27.6447	27.8439
MSMEG_2074	1.49413	2.34215	22.6888	22.6259	23.1252	24.3358	23.9351	24.6515
MSMEG_2123	1.4476	1.93351	22.458	23.2666	22.7426	23.8186	24.5513	24.44
MSMEG_2205	0.764689	3.01781	22.916	23.1007	22.9839	23.8985	23.7307	23.6656
MSMEG_2249	0.656344	2.53215	22.4636	22.7351	22.7117	23.2268	23.2562	23.3964
MSMEG_2360	-0.436303	1.13568	22.9199	23.0977	22.9691	22.8883	22.3036	22.4859
MSMEG_2373	-0.313779	1.1931	24.9468	24.8513	24.8569	24.3774	24.5464	24.7898
MSMEG_2389	-1.87661	4.16375	28.4799	28.3936	28.4761	26.7502	26.3835	26.5861
MSMEG_2393	0.418498	1.28542	22.9575	23.1264	23.1637	23.7668	23.2984	23.4378
MSMEG_2394	0.952791	2.43426	24.2046	24.3954	24.6053	25.5512	25.322	25.1906
MSMEG_2399	0.125276	0.475207	22.5662	22.9318	22.6978	22.9046	22.7764	22.8906
MSMEG_2414	0.445569	1.58093	24.5532	24.9818	24.7588	25.2386	25.135	25.257
MSMEG_2440	-0.852521	2.0453	27.3401	27.4167	27.2592	26.1543	26.5623	26.7419
MSMEG_2468	0.64403	3.87775	23.6273	23.7275	23.688	24.3893	24.2758	24.3099
MSMEG_2529	0.929658	2.73889	23.0032	23.1742	22.9778	24.1993	23.8412	23.9036
MSMEG_2539	-0.766975	1.35736	23.5416	23.015	23.0371	22.1668	22.3019	22.8241
MSMEG_2578	-1.42683	2.40796	24.6752	24.3603	24.3879	22.7562	22.9173	23.4694
MSMEG_2664	2.12593	2.52707	23.6296	24.2935	24.7229	26.4376	26.4169	26.1692
MSMEG_2744	-0.633471	1.5367	25.5462	25.039	24.9543	24.5482	24.4679	24.623
MSMEG_2746	-0.350594	0.774944	24.1217	24.2908	24.295	23.5085	23.9547	24.1925
MSMEG_2752	-0.926222	1.85069	25.0429	24.3173	24.534	23.6586	23.6387	23.8183
MSMEG_2760	0.20075	0.292257	23.2981	22.8137	22.606	22.8108	23.4549	23.0543
MSMEG_2763	-1.16319	3.14526	25.7309	25.5468	25.9513	24.5682	24.5157	24.6556
MSMEG_2765	-1.3967	3.81235	26.4461	26.3259	26.4402	24.8374	25.0299	25.1548
MSMEG_2780	0.0616608	0.0756684	23.1156	23.3442	23.6538	23.8794	23.3633	23.0558
MSMEG_2782	0.891431	2.19923	24.6237	24.5815	24.7474	25.2185	25.6797	25.7287
MSMEG_2940	-1.9959	4.06605	26.9425	26.7955	27.0155	24.9875	25.0624	24.7159
MSMEG_3004	-1.63325	3.01763	27.8242	27.5611	27.7056	25.7391	26.1297	26.3224
MSMEG_3041	-1.02116	3.18072	23.9453	23.8139	23.8602	22.6569	22.9182	22.9809
MSMEG_3043	1.07018	2.40056	23.4435	23.2578	23.7269	24.7785	24.4095	24.4508
MSMEG_3050	-1.96453	4.54691	30.8499	30.595	30.8692	28.7578	28.8196	28.8432
MSMEG_3059	-0.837624	1.95675	26.5585	26.2641	26.4297	25.7784	25.2485	25.7125
MSMEG_3138	-1.3763	2.48817	27.1318	26.7745	26.8927	25.3644	25.3658	25.94
MSMEG_3240	-2.72664	2.88162	24.036	23.654	23.7851	20.4599	21.3572	21.478
MSMEG_3603	-0.423862	0.865282	22.6148	23.1423	22.9027	22.1247	22.6496	22.6139
MSMEG_3604	1.07104	1.16378	23.7519	24.8478	24.8369	25.3612	25.2718	26.0167
MSMEG_3618	-1.97172	3.6981	29.0742	28.5798	28.8442	26.897	26.7621	26.924
MSMEG_3621	-0.275849	0.799297	23.2438	23.2917	23.4942	23.3171	22.8337	23.0514
MSMEG_3645	0.0518087	0.125623	24.7372	24.8137	24.6813	24.5247	24.8374	25.0255
MSMEG_3662	-0.708876	1.23059	25.5365	25.3736	25.7695	24.3611	25.1004	25.0916
MSMEG_3741	-0.315826	0.600584	24.3717	24.2928	23.7724	23.6234	24.1013	23.7648
MSMEG_3770	-0.370662	1.57857	24.0788	23.9474	24.0046	23.7724	23.7048	23.4415
MSMEG_4268	-0.485423	1.47602	24.8636	24.9152	25.0015	24.5625	24.1486	24.6129
MSMEG_4272	-1.26811	3.17547	30.5876	30.3004	30.3935	28.9554	29.2483	29.2734
MSMEG_4623	-0.863612	1.3537	21.1607	21.5	21.0852	19.8511	20.5872	20.7167
MSMEG_4625	-1.12064	2.18732	27.7549	28.4219	28.3428	26.9621	27.0851	27.1106
MSMEG_4671	-1.00371	2.67635	24.3589	24.0463	24.2722	23.0843	23.1492	23.4328
MSMEG_4672	-0.229621	2.34644	24.7183	24.5921	24.6982	24.4531	24.4274	24.4392
MSMEG_4686	-2.03766	3.98211	25.2964	24.9678	25.2145	23.26	22.9575	23.1482
MSMEG_4709	-1.16924	2.72108	24.5073	24.2309	24.1132	23.0484	22.965	23.3303
MSMEG_4715	-0.0829608	0.22904	22.7686	22.9847	23.1902	23.0182	22.9098	22.7665
MSMEG_4890	0.486635	0.499176	26.7163	27.4223	27.7556	28.0304	28.1277	27.196
MSMEG_4901	0.254368	0.839483	24.2415	24.4881	24.4414	24.4077	24.7694	24.757
MSMEG_4971	-0.570214	1.38466	25.9064	25.5451	25.5618	24.8031	25.3013	25.1983
MSMEG_5078	0.340549	0.708952	23.0649	22.5661	22.6438	23.0942	23.37	22.8323
MSMEG_5122	-1.68055	2.99727	30.7567	30.359	30.5978	28.5765	29.0233	29.072
MSMEG_5129	1.63275	2.85944	23.2012	23.7068	23.6256	24.9104	25.3756	25.1459
MSMEG_5258	0.133743	0.230072	26.3934	26.2164	25.7518	26.3633	26.3922	26.0073
MSMEG_5261	-0.433733	0.984026	24.9768	24.8321	24.786	24.139	24.3448	24.8099
MSMEG_5265	2.22812	3.3004	24.0198	24.0722	24.661	26.6082	26.4469	26.3822
MSMEG_5328	-1.21678	2.81086	28.5983	28.1685	28.417	27.0616	27.3724	27.0995
MSMEG_5454	1.20007	2.04435	23.5713	23.9138	24.3328	25.3402	24.9106	25.1672
MSMEG_5471	-0.686731	3.40311	25.0513	25.1176	25.1268	24.3267	24.5227	24.386
MSMEG_5576	0.492137	1.8538	22.7126	22.6863	23.0235	23.2348	23.2736	23.3905
MSMEG_5675	0.852256	1.99869	24.1717	24.3871	24.5716	24.9653	25.2572	25.4646
MSMEG_5676	-0.498359	0.716648	22.8313	23.3129	23.4962	23.0191	22.9036	22.2226
MSMEG_5680	1.85922	3.75708	26.5004	26.7146	26.5623	28.4287	28.674	28.2522
MSMEG_5873	-1.02077	3.26566	23.6263	23.3645	23.6794	22.5515	22.4824	22.574
MSMEG_5890	-1.66704	5.15332	28.253	28.2061	28.2147	26.4691	26.5511	26.6524
MSMEG_6208	1.16871	2.22517	22.1388	22.6355	22.3954	23.5469	23.8514	23.2777
MSMEG_6282	-0.323577	0.880879	25.2937	25.6991	25.8309	25.1723	25.3379	25.3427
MSMEG_6373	0.351666	1.39224	22.6045	22.812	22.5453	22.8565	23.007	23.1532
MSMEG_6422	0.935455	3.02183	25.6723	25.9377	26.0007	26.8237	26.7344	26.8589
MSMEG_6822	-1.28091	2.06084	25.8355	25.1879	25.0368	24.2307	23.8689	24.1178
MSMEG_6894	-1.29913	2.87148	28.9519	28.7102	28.9424	27.2864	27.6769	27.7437
MSMEG_6896	-0.252443	1.23117	28.8767	28.6728	28.7695	28.3733	28.628	28.5604
MSMEG_0028	-0.419259	1.394	23.634	23.91	23.9186	23.1931	23.5191	23.4928
MSMEG_0131	0.22863	0.370259	24.3255	24.0378	24.6172	24.8819	24.2011	24.5834
MSMEG_0422	0.548856	2.03321	23.3158	23.5489	23.5724	24.0351	24.1679	23.8806
MSMEG_0600	1.05168	1.68038	22.939	22.8138	22.3135	23.3492	24.0714	23.8007
MSMEG_0670	0.130144	0.221476	23.3374	22.85	22.5596	22.9819	23.0703	23.0853
MSMEG_0703	-1.17199	2.47309	24.9317	24.332	24.6415	23.4135	23.6066	23.3691
MSMEG_0717	-0.948443	2.4191	23.8983	24.2046	24.1438	23.2514	23.2687	22.8813
MSMEG_0859	0.0218137	0.0330151	26.9151	27.0752	26.3544	26.7152	26.8353	26.8597
MSMEG_0877	-0.362202	2.01573	25.1368	25.2426	25.1765	24.6837	24.8653	24.9203
MSMEG_0953	-1.10996	3.74167	24.5661	24.5714	24.5385	23.2897	23.4907	23.5658
MSMEG_1334	-0.432884	1.44154	25.2351	25.0766	24.9929	24.4809	24.6326	24.8925
MSMEG_1350	0.889648	2.04483	22.5486	22.5055	23.0343	23.5424	23.7413	23.4736
MSMEG_1423	-0.870315	1.71528	23.7651	23.5964	23.3502	23.091	22.5147	22.495
MSMEG_1480	-0.530543	1.30504	23.423	23.5342	23.1839	22.5536	22.8933	23.1026
MSMEG_1782	0.241295	0.209595	25.4901	24.2005	24.1684	24.6687	24.9396	24.9745
MSMEG_1930	0.869211	1.39566	22.2286	22.2544	22.0976	23.1474	23.5109	22.53
MSMEG_2033	0.64753	1.17829	25.0387	25.2842	24.9192	25.3084	25.7553	26.121
MSMEG_2080	-0.620768	1.79395	24.9828	24.6708	25.1017	24.2926	24.15	24.4503
MSMEG_2081	-0.784768	2.87297	25.9276	25.6969	26.0183	25.1135	25.0504	25.1245
MSMEG_2118	1.45431	3.49039	22.5483	22.9605	22.8398	24.1794	24.2838	24.2484
MSMEG_2189	1.40472	2.19877	21.9337	22.64	22.491	23.4946	23.737	24.0473
MSMEG_2357	0.803353	1.67377	21.948	22.6277	22.0497	22.9542	22.9629	23.1184
MSMEG_2379	1.45326	2.15649	25.0332	25.8172	25.6711	26.6784	27.2013	27.0015
MSMEG_2395	-0.508516	1.19369	23.9546	24.0412	23.8374	23.0566	23.6698	23.5812
MSMEG_2740	-1.92506	3.21404	25.1551	25.0665	25.29	22.939	23.5803	23.2172
MSMEG_2771	1.08667	3.0637	23.1326	23.286	23.3948	24.2795	24.2476	24.5463
MSMEG_2786	-0.853857	2.18281	23.0179	22.6411	22.4813	21.9225	21.7798	21.8765
MSMEG_2850	-0.995835	1.8807	25.0875	25.0587	25.2059	23.6617	24.3448	24.3582
MSMEG_2976	-0.913462	3.8832	24.8059	24.8982	24.9955	23.9623	24.048	23.9489
MSMEG_2982	-0.0410716	0.0879413	22.5419	22.3439	22.4528	22.1421	22.3921	22.6811
MSMEG_2999	1.12145	2.08823	21.9251	22.1759	22.2813	23.2778	23.587	22.8818
MSMEG_3124	-0.0412706	0.111692	24.7817	25.1118	24.9412	24.9509	24.7224	25.0376
MSMEG_3150	-1.02037	4.51763	26.0014	26.0082	26.0884	25.0053	25.0844	24.9473
MSMEG_3246	-0.130253	0.324958	24.675	25.0286	24.6363	24.5052	24.5843	24.8596
MSMEG_3430	-0.198004	0.832938	23.8427	24.1376	23.9348	23.645	23.8739	23.8021
MSMEG_3673	-0.381497	0.536929	22.6032	22.2771	22.5705	21.5925	22.617	22.0968
MSMEG_3740	-1.18974	5.09546	24.2491	24.2811	24.2536	22.9929	23.1108	23.1108
MSMEG_3746	-0.796094	1.85506	23.8495	23.9696	24.3314	23.4145	23.0101	23.3374
MSMEG_3772	1.28365	3.39857	24.7298	24.9671	25.0937	26.1172	26.2799	26.2444
MSMEG_3773	0.396524	0.925764	25.33	25.5912	25.2551	25.5112	25.7502	26.1044
MSMEG_3810	-0.872462	2.18932	27.3502	26.8178	27.0189	26.158	26.1006	26.3109
MSMEG_3858	-1.05222	2.10081	26.7264	26.6213	26.6182	25.1813	25.8119	25.816
MSMEG_4232	0.320664	0.675913	23.1792	23.3899	22.8328	23.241	23.4005	23.7224
MSMEG_4307	0.539841	1.3137	23.8103	23.6612	23.5609	23.8901	24.2581	24.5037
MSMEG_4537	1.08913	3.26622	23.7362	23.5399	23.8457	24.8282	24.6797	24.8813
MSMEG_4627	-0.0655937	0.0836938	29.2569	29.1076	28.6784	28.5338	29.2641	29.0483
MSMEG_4664	0.756259	3.02755	22.7287	22.8329	22.9253	23.6986	23.5841	23.4731
MSMEG_4957	-0.842632	2.39436	25.1267	24.8619	24.9605	24.3528	23.9411	24.1273
MSMEG_4976	-1.06724	2.55892	27.399	27.1213	27.0917	25.9229	26.1177	26.3697
MSMEG_4985	0.1673	0.804433	26.906	27.0099	26.8132	27.0437	26.9623	27.2249
MSMEG_4999	-0.447628	2.9067	23.094	23.0924	23.1268	22.7237	22.5502	22.6964
MSMEG_5073	-0.475895	1.04488	24.5095	24.8483	24.4059	24.0454	24.4289	23.8616
MSMEG_5121	1.00582	2.61673	24.2356	24.6689	24.5819	25.5601	25.3714	25.5725
MSMEG_5132	-0.739518	3.58254	25.7606	25.866	25.7381	25.0329	24.9778	25.1355
MSMEG_5248	-0.105255	0.254185	25.8727	26.0464	26.0179	26.1425	25.6042	25.8745
MSMEG_5342	-1.5791	1.79432	27.4978	26.3347	26.5655	24.8846	25.4394	25.3367
MSMEG_5368	-0.867469	3.42013	24.3279	24.3968	24.5535	23.597	23.6025	23.4763
MSMEG_5727	1.89923	2.00566	22.3425	23.1571	23.6434	24.6458	25.1785	25.0164
MSMEG_5912	-0.998552	3.19209	26.6292	26.8662	26.8961	25.8314	25.6828	25.8816
MSMEG_5999	-0.185878	0.565019	24.6577	24.5482	24.5771	24.1497	24.4349	24.6408
MSMEG_6037	0.783466	2.07115	23.3898	23.2232	23.6319	24.3762	24.2242	23.9949
MSMEG_6038	0.700686	1.45992	22.4187	22.6372	23.0114	23.5328	23.5274	23.1092
MSMEG_6077	-1.21297	2.37174	27.3471	27.207	27.2512	25.6518	26.2192	26.2955
MSMEG_6212	0.327262	0.18968	25.9247	23.9904	24.186	24.8245	24.7509	25.5075
MSMEG_6285	-0.959965	2.49866	23.8637	23.7102	24.1461	22.9849	23.0649	22.7904
MSMEG_6425	-1.07394	3.97957	26.7362	26.6364	26.7748	25.6064	25.5668	25.7525
MSMEG_6515	1.59979	2.90763	23.3102	22.7579	23.2853	24.667	24.6143	24.8715
MSMEG_6584	-0.555105	1.2876	23.2193	23.3972	23.1271	23.0509	22.4271	22.6002
MSMEG_6752	-1.32748	3.85121	27.1253	26.8834	26.8583	25.6366	25.5589	25.6891
MSMEG_6754	0.606775	1.25229	25.86	26.5297	26.081	26.7213	26.5915	26.9783
MSMEG_6874	1.08068	2.28784	21.1776	21.7088	21.7485	22.7299	22.5106	22.6365
MSMEG_6907	1.24444	3.59383	24.6341	24.5808	24.8326	25.8159	25.9186	26.0464
MSMEG_0067	-2.03852	3.82912	25.6411	25.2521	25.2391	23.4515	23.3189	23.2463
MSMEG_0076	-1.01925	1.89984	25.8637	25.9917	25.7883	24.5727	24.6987	25.3145
MSMEG_0250	-1.56931	3.28124	24.6489	24.2724	24.5624	23.0349	22.7178	23.0231
MSMEG_0766	1.54346	2.90445	24.139	24.7336	24.5553	26.0051	26.1487	25.9044
MSMEG_0789	-0.302991	0.505116	24.1961	24.6344	24.347	24.0423	24.5072	23.719
MSMEG_0940	-1.64293	4.04475	26.125	26.0109	25.9317	24.2097	24.4912	24.4379
MSMEG_0954	-0.986717	2.42049	23.9837	24.227	24.1197	23.3022	22.8307	23.2373
MSMEG_1365	-0.314245	1.26834	31.9642	32.2546	32.0079	31.7523	31.6394	31.8922
MSMEG_1444	-1.65567	3.30721	29.6058	29.4777	29.369	27.562	27.864	28.0595
MSMEG_1512	1.13192	3.09864	24.2122	24.2002	24.5624	25.5273	25.4251	25.4182
MSMEG_1523	0.45966	0.390718	26.2761	27.5833	27.4813	28.0396	27.5566	27.1235
MSMEG_1634	-0.752944	1.79266	26.8558	27.1796	27.2324	26.0593	26.3905	26.5592
MSMEG_1635	0.0791124	0.169119	25.7864	25.5458	25.7323	25.4814	26.0382	25.7822
MSMEG_1657	0.529699	1.69771	24.6987	24.8305	24.4855	25.0023	25.2925	25.309
MSMEG_1694	-1.11952	2.89664	26.3754	26.0688	26.1521	24.8717	25.1838	25.1823
MSMEG_1695	1.58773	3.57193	22.2788	22.4293	22.6388	24.1939	23.9803	23.936
MSMEG_2070	0.766605	2.12237	23.3292	23.1491	23.3602	24.2864	23.8056	24.0464
MSMEG_2079	-0.224074	0.796357	25.7968	25.5539	25.56	25.2167	25.4594	25.5623
MSMEG_2410	-0.87009	2.12914	26.2654	26.0142	25.8172	25.2164	24.9408	25.3294
MSMEG_2415	-0.86791	0.767203	27.7891	26.5344	26.8775	25.6139	26.1224	26.8609
MSMEG_2416	-0.569584	1.41479	25.4455	25.6258	25.4859	24.6112	25.0153	25.222
MSMEG_2516	0.795055	2.20951	23.4076	23.0396	23.4112	24.0293	24.25	23.9641
MSMEG_2528	-0.819995	2.13985	24.7335	24.379	24.5988	23.536	23.745	23.9703
MSMEG_2580	-1.64933	3.8725	24.4239	24.193	24.3005	22.8064	22.4866	22.6765
MSMEG_2598	0.258967	0.788501	22.8256	23.318	23.0957	23.3268	23.4344	23.2551
MSMEG_2641	0.850736	2.11767	25.5425	25.9509	25.9076	26.435	26.7102	26.8081
MSMEG_2766	-1.96826	3.61617	26.5447	26.1088	26.4188	24.2212	24.4106	24.5357
MSMEG_2784	-0.903479	1.75665	28.1025	27.4245	27.8066	26.6638	26.8699	27.0895
MSMEG_2900	1.1096	2.20224	23.3785	23.5373	23.9028	25.002	24.5799	24.5655
MSMEG_2941	-0.565063	1.02541	26.7209	26.1247	26.143	25.4262	25.9266	25.9406
MSMEG_3019	1.06067	2.86521	23.5087	23.6567	23.7632	24.7206	24.8874	24.5026
MSMEG_3034	0.247663	0.771919	24.2047	24.15	23.976	24.4823	24.0966	24.4949
MSMEG_3147	-0.690081	1.6818	24.4833	24.3251	24.6645	24.0694	23.5205	23.8127
MSMEG_3479	-1.78267	3.43035	32.0333	31.6294	31.9006	29.9333	29.9987	30.2833
MSMEG_3608	1.46234	1.86087	21.2718	22.1301	22.3142	23.6241	23.161	23.318
MSMEG_3620	0.38517	0.855622	26.1522	26.2723	26.3876	26.7135	26.9662	26.288
MSMEG_3636	-0.61372	3.73336	25.1878	25.073	25.1031	24.5022	24.4571	24.5634
MSMEG_3758	0.541221	1.39334	23.5191	23.7718	24.1061	24.4651	24.2723	24.2833
MSMEG_4262	-0.0189508	0.0286886	23.8472	23.6996	23.9263	24.2274	23.6278	23.5612
MSMEG_4270	-0.712582	4.77511	25.5016	25.5128	25.4763	24.7797	24.7397	24.8335
MSMEG_4313	-0.649546	1.40662	29.7499	29.2451	29.2481	28.532	28.9987	28.7636
MSMEG_4325	-0.972081	4.06304	28.5311	28.394	28.4504	27.4586	27.4257	27.575
MSMEG_4381	0.414639	2.23041	22.8295	23.0084	22.8467	23.2891	23.409	23.2304
MSMEG_4632	-0.901902	2.82604	23.4849	23.3562	23.5526	22.5058	22.4231	22.7592
MSMEG_4722	-0.65372	1.96583	24.7863	24.6399	25.0267	23.9853	24.2181	24.2883
MSMEG_4723	-0.463252	1.83913	22.4631	22.1901	22.541	21.9817	21.8653	21.9576
MSMEG_4755	0.66058	1.36349	25.2281	25.785	25.5893	25.903	26.4406	26.2405
MSMEG_5114	0.0799173	0.266768	22.9937	23.1815	22.9594	23.3138	23.074	22.9865
MSMEG_5639	-0.378776	1.78159	25.4889	25.2058	25.4519	25.0726	24.9628	24.9748
MSMEG_5725	1.41915	2.51357	23.8495	24.26	24.5149	25.8424	25.5062	25.5332
MSMEG_5852	0.992903	1.94894	26.6031	26.9717	27.0046	27.5187	28.1462	27.8932
MSMEG_6213	1.35185	1.64356	24.7731	23.649	24.1701	25.1751	25.7701	25.7026
MSMEG_6229	0.5913	1.51089	23.6391	24.0266	24.2001	24.4142	24.5623	24.6633
MSMEG_6289	-1.2678	2.94427	25.253	25.0785	25.1576	23.6385	23.9117	24.1354
MSMEG_6412	-0.660231	2.24328	25.3704	25.7097	25.604	24.8925	24.7841	25.0268
MSMEG_6413	0.635877	1.18132	24.4005	24.4612	24.9418	25.3359	25.4989	24.8764
MSMEG_6431	-1.18757	2.36459	28.782	28.3929	28.6535	27.7144	27.1304	27.421
MSMEG_6585	-1.83925	2.31452	25.9153	25.107	24.9398	23.302	23.7197	23.4227
MSMEG_6897	-0.692745	2.67324	29.5408	29.3705	29.3096	28.7073	28.5974	28.8381
MSMEG_0224	0.231946	0.580512	24.4809	24.9671	24.4403	24.806	24.806	24.9721
MSMEG_0239	1.52795	2.62411	24.3118	24.7322	25.0224	26.1562	26.3843	26.1098
MSMEG_0309	-0.935808	1.50621	23.6535	23.5349	23.5265	22.3558	23.2046	22.347
MSMEG_0365	-1.56221	2.62876	24.1966	23.8511	23.6212	22.1644	22.1826	22.6354
MSMEG_0536	-1.48075	1.40773	28.4767	27.0751	27.3021	25.6867	26.314	26.411
MSMEG_0919	-1.66068	3.33996	29.0261	28.9778	29.0967	27.0779	27.4461	27.5947
MSMEG_0943	0.0524006	0.166819	26.2787	26.2563	26.2586	26.1947	26.2028	26.5534
MSMEG_1133	-0.563212	2.80928	22.7096	22.6124	22.7309	22.215	21.9996	22.1487
MSMEG_1165	-1.51065	3.01946	28.4166	28.1276	28.081	26.4328	26.7631	26.8974
MSMEG_1399	0.317844	0.686868	27.0947	27.6657	27.5421	27.9591	27.7512	27.5457
MSMEG_1424	-0.369936	0.525227	25.1152	25.2883	25.2182	25.2602	24.2435	25.0082
MSMEG_1436	-0.0450885	0.0423092	26.7251	26.6505	26.8088	27.135	26.943	25.9711
MSMEG_1470	-0.510676	1.41868	27.7776	28.1466	28.3069	27.6777	27.475	27.5463
MSMEG_1472	-0.399595	0.992434	27.5993	28.0651	27.6775	27.3009	27.2214	27.6209
MSMEG_1513	1.46037	2.33712	25.5024	25.9811	25.3451	26.7356	27.2758	27.1984
MSMEG_1521	-0.178019	0.251302	28.287	28.0557	27.8429	28.2971	27.9206	27.4338
MSMEG_1543	0.145932	0.181663	28.3639	28.1825	28.0108	28.8894	28.1799	27.9258
MSMEG_1548	-1.78166	2.4168	26.4886	26.1906	25.6874	24.6937	24.0931	24.2348
MSMEG_1557	-0.995878	2.49141	28.8371	29.0434	28.5611	27.85	27.9261	27.6779
MSMEG_1642	-0.720188	2.78283	23.8212	23.8692	23.9335	23.0556	23.0743	23.3335
MSMEG_1821	-0.31686	1.18748	27.0614	27.4341	27.0698	26.8664	26.8306	26.9176
MSMEG_1914	-0.739365	3.10881	26.2257	26.1984	26.1566	25.4753	25.3099	25.5773
MSMEG_1959	-1.11679	2.06366	24.3598	24.2807	24.5342	23.6121	22.8609	23.3512
MSMEG_2078	0.532786	0.585019	26.3128	26.3353	26.1996	27.276	27.1604	26.0098
MSMEG_2207	1.94181	2.06232	21.7871	22.4765	22.2137	23.8711	23.6407	24.791
MSMEG_2388	0.80976	2.12588	25.597	25.7671	26.0853	26.4805	26.7351	26.663
MSMEG_2408	-0.465379	1.26046	27.0515	27.3975	27.1573	26.4861	26.7546	26.9695
MSMEG_2421	-0.562401	1.52471	26.9142	26.6592	26.4204	25.9447	26.0949	26.2671
MSMEG_2613	-0.205858	0.509447	23.8409	23.9085	24.1402	24.0529	23.5479	23.6711
MSMEG_3030	-0.545669	2.46563	24.9422	25.1906	25.0918	24.6105	24.5391	24.4379
MSMEG_3122	-1.29766	3.39324	25.6414	25.5227	25.5865	24.5013	24.1126	24.2437
MSMEG_3184	1.26789	1.65682	23.3735	22.8683	23.7002	24.7743	24.8873	24.084
MSMEG_3219	-1.65312	3.31556	27.5516	27.3183	27.4532	25.5483	25.7697	26.0458
MSMEG_3235	-0.614184	2.89897	28.0133	27.9517	28.0405	27.5126	27.2663	27.384
MSMEG_3280	-0.670813	1.99057	23.3574	23.5253	23.5213	22.9293	22.9367	22.5257
MSMEG_3574	0.464757	1.36162	23.7529	23.8909	24.1131	24.6235	24.2522	24.2755
MSMEG_3605	-0.0386957	0.0500785	26.4602	27.2506	27.1014	26.7045	27.0766	26.915
MSMEG_3647	-1.03184	2.24318	29.8265	29.6657	29.7876	28.3781	29.0072	28.799
MSMEG_3775	-0.978811	2.51592	27.4028	27.1456	27.1283	26.0457	26.2206	26.474
MSMEG_3776	1.0153	2.32244	24.8478	25.2912	25.0252	25.8932	26.0074	26.3094
MSMEG_3808	-0.0749658	0.216333	22.6309	22.4863	22.6035	22.5392	22.6959	22.2607
MSMEG_3811	-1.34761	2.68661	30.5658	30.4992	30.5554	28.9423	29.0742	29.5611
MSMEG_3894	-0.0139885	0.0269102	27.1972	27.1186	26.7336	26.8451	26.976	27.1865
MSMEG_3962	0.400199	0.286535	23.2679	23.7853	24.5522	24.1923	25.0359	23.5777
MSMEG_4112	1.70227	2.73158	21.8098	21.9072	22.2889	24.024	23.6909	23.3977
MSMEG_4298	-0.196641	0.405164	28.8979	29.5541	29.4006	29.1579	28.9781	29.1268
MSMEG_4299	0.425645	2.31254	25.4121	25.404	25.3392	25.9389	25.6902	25.8031
MSMEG_4684	0.545049	1.30222	27.2843	27.4096	27.1954	27.481	27.9418	28.1015
MSMEG_4917	-0.0363731	0.0477257	25.8094	25.9255	25.6207	25.2768	25.8676	26.102
MSMEG_5061	-0.752313	2.57835	24.1484	23.8888	23.7736	23.1432	23.1935	23.2172
MSMEG_5182	0.0999241	0.311906	24.0548	24.2042	24.1627	24.4661	24.0426	24.2127
MSMEG_5184	1.01518	2.89256	24.3947	24.4357	24.5867	25.6787	25.4911	25.2928
MSMEG_5404	-1.18411	3.34048	25.2477	25.0384	24.9703	23.9842	23.9682	23.7515
MSMEG_5642	1.69513	3.49521	22.1825	22.3099	22.6319	24.069	23.9662	24.1745
MSMEG_5684	2.08512	3.16917	25.3757	25.9465	25.9616	27.877	28.0083	27.6539
MSMEG_5830	1.25564	2.83187	23.9774	24.2554	24.523	25.4636	25.5773	25.4818
MSMEG_5940	0.0966396	0.215248	26.1888	26.1535	25.921	25.9637	26.1114	26.4782
MSMEG_6257	0.201515	0.953871	25.1321	25.4123	25.1925	25.3533	25.4627	25.5254
MSMEG_6363	1.41733	2.7055	23.47	23.8442	24.0473	25.0047	25.2818	25.3269
MSMEG_6365	-1.35506	2.40189	29.277	28.6724	28.7797	27.3553	27.5098	27.7988
MSMEG_6414	-2.53276	4.91158	23.0104	23.2757	23.0618	20.4828	20.6501	20.6167
MSMEG_6467	0.21309	0.237862	28.4098	27.9192	27.5916	27.7279	28.2023	28.6298
MSMEG_6520	-0.615545	1.58015	26.5098	26.6633	26.1434	25.6461	25.9459	25.8779
MSMEG_6602	0.780568	2.34438	23.3476	23.4822	23.7999	24.3498	24.2828	24.3387
MSMEG_6941	-0.105898	0.259508	27.997	28.2724	27.7889	28.0553	27.9155	27.7698
MSMEG_0024	-0.760779	2.17317	31.9137	31.8965	31.9185	30.8797	31.1791	31.3875
MSMEG_0127	0.155364	0.447224	25.893	25.6961	25.5219	25.6807	25.8552	26.0412
MSMEG_0317	-0.502602	1.76075	24.8497	24.4707	24.5391	24.1547	24.011	24.186
MSMEG_0445	0.238393	0.982046	24.2696	24.4541	24.1038	24.4102	24.5705	24.562
MSMEG_0692	-1.53752	3.79346	24.9693	25.1155	25.2556	23.4779	23.5267	23.7233
MSMEG_1242	1.28392	2.42285	24.7074	24.9031	24.303	25.7695	25.8421	26.1537
MSMEG_1482	-0.461016	1.44214	25.0167	24.956	24.9882	24.2318	24.652	24.694
MSMEG_1582	-0.707245	2.23953	32.9762	33.0042	33.1023	32.1998	32.1895	32.5717
MSMEG_1652	1.6008	2.5864	27.4543	27.6276	27.2248	28.6287	29.3184	29.162
MSMEG_1762	0.983415	3.94084	23.3187	23.3462	23.2761	24.257	24.4192	24.2151
MSMEG_1825	-0.864609	2.19456	26.4003	26.3934	26.3305	25.2015	25.7599	25.5689
MSMEG_1836	-0.707407	3.52979	23.9767	24.085	24.1423	23.3439	23.3097	23.4282
MSMEG_2073	0.491532	2.53825	22.6418	22.7875	22.8899	23.2216	23.3016	23.2706
MSMEG_2381	-1.07621	2.54452	27.4002	27.3573	27.283	25.9479	26.4244	26.4396
MSMEG_2391	0.120653	0.430871	23.7591	23.5515	23.9203	23.8973	23.7581	23.9374
MSMEG_2435	-1.30362	4.18881	28.7117	28.6541	28.7724	27.4565	27.4938	27.277
MSMEG_2497	-0.33481	0.491372	24.0403	23.4125	23.2828	23.3676	23.4799	22.8836
MSMEG_2519	-1.15853	2.9547	28.1921	28.0416	28.3027	27.2483	26.9407	26.8719
MSMEG_2628	-0.79565	2.08497	26.2708	26.4288	26.3142	25.7067	25.6906	25.2295
MSMEG_2684	-0.102512	0.464497	26.5549	26.465	26.3186	26.2557	26.3023	26.473
MSMEG_2937	-0.158876	0.40201	27.5287	27.4359	27.0827	27.3599	27.0213	27.1895
MSMEG_3044	-0.343524	1.31449	25.6571	25.8696	25.6063	25.3958	25.1958	25.5109
MSMEG_3206	1.11986	2.68663	24.157	24.5115	24.4373	25.3341	25.4193	25.712
MSMEG_3221	-1.92034	4.26146	26.1105	25.9044	26.1491	23.9863	24.2037	24.2129
MSMEG_3465	1.71398	3.20516	23.1804	23.0051	23.5393	25.1067	24.8387	24.9213
MSMEG_3599	-1.08204	4.53226	28.0402	28.1735	28.1785	27.0583	27.0039	27.084
MSMEG_3625	1.08795	2.99861	24.6333	24.9333	24.6383	25.966	25.6956	25.8071
MSMEG_3739	-2.2815	4.15295	26.4526	26.2958	26.5058	23.9585	24.0901	24.3611
MSMEG_3881	-0.75797	2.18714	25.6556	25.7483	25.493	24.6713	24.8493	25.1025
MSMEG_3895	0.534093	1.80886	26.6787	26.7598	26.8895	27.2911	27.1178	27.5213
MSMEG_3902	-0.695236	2.86081	25.8498	25.6922	25.7308	25.0667	24.9322	25.1882
MSMEG_4296	-0.270738	0.836155	24.6404	24.3689	24.1362	24.1022	24.1783	24.0527
MSMEG_4584	-1.11023	3.222	24.4142	24.6992	24.369	23.2935	23.4218	23.4364
MSMEG_4921	-1.32572	2.9831	29.546	29.1489	29.2233	27.7976	28.0172	28.1262
MSMEG_5435	-0.521886	1.2242	25.6275	25.9484	26.1834	25.541	25.1618	25.4908
MSMEG_5441	-0.253862	0.483751	24.1372	24.3568	24.6535	24.4461	24.0862	23.8537
MSMEG_5486	-1.82983	4.40404	27.3441	27.2977	27.5527	25.4904	25.5529	25.6618
MSMEG_5520	-0.0280291	0.0340837	24.028	24.0172	24.0607	23.8883	24.5364	23.5971
MSMEG_5658	1.76239	3.72531	23.8607	23.5791	23.693	25.6472	25.2842	25.4885
MSMEG_5734	1.32132	2.74355	25.3156	25.3925	25.8457	26.7216	26.8353	26.9609
MSMEG_5925	0.906858	1.59086	25.0081	24.2533	24.5785	25.3254	25.4347	25.8004
MSMEG_5937	1.31955	2.74094	24.6795	25.284	25.0228	26.2807	26.2717	26.3927
MSMEG_6105	-0.271869	0.506893	24.0585	24.5049	23.9623	23.7737	23.7057	24.2307
MSMEG_6189	-0.541016	1.24033	26.7352	26.2781	26.3405	26.012	25.6213	26.0973
MSMEG_6398	-0.361986	1.17871	29.4404	29.5152	29.3494	29.2794	29.1238	28.8159
MSMEG_6514	-0.481864	1.43609	25.1885	24.811	24.8897	24.4393	24.3231	24.6812
MSMEG_6565	-0.174499	2.26993	25.5552	25.5517	25.6063	25.3819	25.3599	25.448
MSMEG_6638	-0.780209	0.650487	24.1954	24.6754	25.064	24.8178	23.2801	23.4963
MSMEG_6740	1.33694	2.2928	23.8844	24.2055	24.6186	25.4833	25.4409	25.7952
MSMEG_6804	-1.32793	2.97593	26.0681	25.6181	25.7873	24.6171	24.3319	24.5408
MSMEG_6938	-1.80653	3.865	26.5457	26.2371	26.4184	24.5413	24.4742	24.7661
MSMEG_0102	0.95753	1.38231	24.4806	24.4593	24.591	25.8462	25.727	24.8302
MSMEG_0108	1.01292	2.84144	25.1322	25.0312	25.2105	26.3735	25.9984	26.0408
MSMEG_0233	-0.338646	0.836043	27.572	27.8091	27.6551	27.0207	27.3775	27.6221
MSMEG_0783	0.548065	2.30665	23.1294	23.4041	23.2002	23.6885	23.854	23.8354
MSMEG_1345	-0.851798	1.63771	28.3581	28.247	28.3306	26.9902	27.6786	27.7114
MSMEG_1439	-0.119236	0.107692	27.1491	27.1183	27.2788	27.645	27.2388	26.3047
MSMEG_1546	-1.70614	2.0657	28.7437	27.9542	27.6278	26.6536	26.3116	26.242
MSMEG_1651	-0.210393	1.03558	26.13	26.102	25.9167	25.7041	25.8926	25.9208
MSMEG_1890	-0.32781	1.60293	26.4483	26.2978	26.2039	25.8837	25.9879	26.0949
MSMEG_2026	-0.992596	4.83522	26.2487	26.187	26.2612	25.1765	25.2635	25.2792
MSMEG_2430	-0.805099	3.51131	24.5515	24.5999	24.6718	23.8249	23.6903	23.8926
MSMEG_2624	-1.40734	3.80509	26.7863	26.5855	26.5531	25.1913	25.3721	25.1395
MSMEG_3095	-1.23394	4.12151	25.0942	25.0249	24.9567	23.8928	23.6777	23.8035
MSMEG_3099	-0.604827	1.4911	27.4188	27.495	27.5432	26.5196	26.9977	27.1251
MSMEG_3123	-0.561884	1.38052	25.0383	24.8686	25.0374	24.1906	24.2903	24.7777
MSMEG_3186	1.13613	4.3052	22.9748	22.9731	22.801	24.0923	24.0408	24.0243
MSMEG_3209	-1.58111	2.85768	27.5807	27.3392	27.344	25.6552	25.6581	26.2073
MSMEG_3255	-1.03969	1.1735	27.8081	26.5988	26.5361	25.8507	26.0063	25.967
MSMEG_3505	1.1668	2.0626	22.6186	23.2062	23.3533	24.3766	24.2474	24.0545
MSMEG_3594	0.400498	1.79203	23.8694	23.9971	23.9329	24.2876	24.2004	24.5129
MSMEG_3598	-0.798213	2.39605	27.8654	28.2196	28.2417	27.2148	27.4099	27.3073
MSMEG_3753	-0.267907	0.779084	26.0688	25.7559	25.8483	25.3666	25.7367	25.766
MSMEG_3769	0.255355	2.02506	24.6495	24.8002	24.8182	24.9956	25.0063	25.0319
MSMEG_4189	0.3943	1.02337	23.9719	23.9709	24.3403	24.4796	24.7229	24.2636
MSMEG_4254	-1.05759	2.82258	25.5703	25.1312	25.4668	24.3246	24.2775	24.3934
MSMEG_4276	0.921296	1.18923	25.4232	26.3975	26.4925	26.7749	27.1717	27.1306
MSMEG_4301	0.675187	1.50998	24.7125	25.0548	25.3675	25.8869	25.6379	25.6356
MSMEG_4367	0.960296	1.92654	26.4366	26.7706	26.5551	27.1614	27.799	27.6829
MSMEG_4626	-1.57631	2.92485	26.5561	26.2122	26.1643	24.518	24.6719	25.0138
MSMEG_4911	1.65843	2.81182	23.7109	23.3651	23.9882	25.5834	25.2154	25.2407
MSMEG_4958	-0.22037	0.489757	24.2028	24.3564	24.615	24.4593	24.1244	23.9294
MSMEG_5022	-0.156492	0.0680532	24.3475	22.6974	23.1754	24.0217	23.7402	21.9889
MSMEG_5103	0.251356	1.3875	23.9869	24.015	23.9815	24.0781	24.3301	24.3293
MSMEG_5795	1.00702	3.23052	23.6024	23.844	23.9131	24.8591	24.7245	24.7969
MSMEG_5828	0.568176	1.67353	25.3418	25.417	24.9286	25.744	25.8394	25.8085
MSMEG_5939	-0.96758	2.12437	28.2411	27.9442	27.9841	26.8463	27.0043	27.4161
MSMEG_6024	0.874421	1.47601	23.3318	23.7371	24.2687	24.7306	24.5818	24.6485
MSMEG_6353	0.472848	1.70194	26.2859	26.6798	26.4656	26.8445	26.984	27.0214
MSMEG_0088	-1.14777	2.50785	24.9018	25.2709	25.4344	24.0383	23.9124	24.2131
MSMEG_0361	-0.944374	2.52695	27.598	27.3217	27.4278	26.2608	26.6409	26.6127
MSMEG_0373	0.194759	0.384972	24.634	24.6689	24.8179	24.7756	24.6263	25.3032
MSMEG_0386	1.69756	3.36643	25.1192	24.9308	25.3657	26.982	26.8719	26.6546
MSMEG_0702	1.07868	2.14517	27.5088	28.091	28.1593	28.8935	29.0587	29.043
MSMEG_0912	1.18154	1.90493	25.9773	25.9009	26.6688	27.5562	27.1347	27.4008
MSMEG_0913	0.143403	0.419427	25.6221	25.7269	25.8332	26.0623	25.6169	25.9332
MSMEG_0969	1.04043	2.65309	25.8241	26.002	26.222	27.219	26.8902	27.0601
MSMEG_1075	1.10606	4.12414	25.3738	25.4601	25.408	26.6367	26.494	26.4294
MSMEG_1347	-1.68819	4.67323	30.3543	30.1571	30.3938	28.6014	28.6179	28.6213
MSMEG_1387	1.93981	3.25996	23.4224	23.1116	23.597	25.5544	25.2917	25.1043
MSMEG_1669	1.08336	2.54349	26.3414	26.8393	26.5211	27.75	27.71	27.4918
MSMEG_1951	-1.19251	1.9972	28.3653	27.6318	27.8449	26.5097	26.7567	26.9981
MSMEG_2362	-0.332772	0.880098	24.7218	24.3333	24.3144	23.9833	24.0347	24.3532
MSMEG_2372	-0.78251	5.32988	25.3802	25.3554	25.3978	24.5908	24.5635	24.6316
MSMEG_2685	0.943438	2.6822	24.7211	24.8336	24.9815	26	25.7333	25.6333
MSMEG_2750	-0.978507	3.19282	27.2743	26.99	27.0381	26.0359	26.2104	26.1206
MSMEG_3058	-0.460836	1.52654	27.2833	27.0544	27.0185	26.5197	26.5743	26.8797
MSMEG_3086	2.04885	3.73088	25.5837	26.0938	25.9517	27.9663	27.9334	27.8761
MSMEG_3106	-0.143258	0.346172	27.5213	27.451	27.4582	27.2027	27.6709	27.1271
MSMEG_3199	-1.25334	2.9597	26.1681	25.7169	25.9082	24.6914	24.5472	24.7946
MSMEG_3205	1.23154	2.44377	24.5829	25.227	24.7455	25.9754	26.1187	26.1559
MSMEG_3778	0.139865	0.391664	25.0639	25.1654	25.4649	25.19	25.4644	25.4594
MSMEG_3839	0.0198542	0.0599079	23.1482	22.8646	23.2429	23.0795	23.1363	23.0995
MSMEG_4295	-1.42494	2.97617	25.9193	25.3913	25.5606	24.09	24.3076	24.1987
MSMEG_4617	1.13968	2.87096	24.1133	24.2132	24.463	25.5468	25.215	25.4467
MSMEG_4950	0.568064	1.16507	25.2122	25.6727	25.4192	25.6422	26.0993	26.2668
MSMEG_5055	-0.304043	1.20636	26.9568	27.2615	27.0352	26.6752	26.7396	26.9266
MSMEG_5089	-2.19383	2.15023	24.7766	24.322	24.5066	21.7384	22.1584	23.1269
MSMEG_5104	1.10718	2.17531	26.3753	27.0994	26.6521	27.8805	27.82	27.7478
MSMEG_5183	0.0818233	0.188542	26.8899	26.9118	27.0537	26.7434	27.0713	27.2862
MSMEG_5198	-1.53478	3.47602	27.1865	26.8985	26.9425	25.293	25.492	25.6381
MSMEG_5263	-1.80375	2.89744	31.014	30.5161	30.8281	28.6586	29.0598	29.2284
MSMEG_5276	-0.164854	0.949707	25.2042	25.2762	25.0107	24.9918	25.0325	24.9722
MSMEG_5422	-0.774773	2.50216	25.5764	25.3315	25.4884	24.5353	24.6629	24.8738
MSMEG_5512	-0.296816	2.9741	24.2025	24.0955	24.1412	23.8706	23.8605	23.8176
MSMEG_5524	0.655656	1.48045	29.6814	30.3695	29.8855	30.6264	30.6008	30.6761
MSMEG_5943	-0.65324	1.74995	26.7946	26.3835	26.3084	25.6992	25.9455	25.8821
MSMEG_6512	0.532564	0.721782	26.1662	27.2416	27.0852	27.3629	27.299	27.4288
MSMEG_6746	0.812865	1.9432	25.0955	25.1603	25.1227	26.1137	26.1291	25.5743
MSMEG_0216	0.348701	1.18091	29.0366	29.3216	29.1816	29.3071	29.6132	29.6657
MSMEG_0464	-0.96699	1.31014	26.3789	26.4544	26.4472	25.4332	24.8762	26.0701
MSMEG_0550	-0.789363	3.4357	27.3324	27.4651	27.5402	26.5853	26.6811	26.7032
MSMEG_1090	-0.190112	1.16201	25.1801	25.1697	24.9612	24.8633	24.9139	24.9634
MSMEG_1364	-1.62164	3.27761	30.8125	30.4691	30.4802	28.7462	29.0287	29.122
MSMEG_1376	-0.488855	1.53853	24.3159	24.4354	24.4052	23.6205	23.9766	24.0928
MSMEG_1476	-0.600751	1.65061	25.6314	25.1498	25.3985	24.6552	24.7587	24.9635
MSMEG_1498	1.57171	3.6968	24.202	24.2712	24.5886	25.8896	25.9273	25.9601
MSMEG_1676	0.874596	2.05689	24.3091	24.2051	24.4741	25.5129	25.1518	24.9474
MSMEG_1950	-1.0564	1.3368	29.4075	28.3638	28.3584	27.4093	27.7588	27.7924
MSMEG_2387	0.537219	1.19916	25.7857	26.476	26.1067	26.7763	26.5423	26.6614
MSMEG_2407	-0.888522	2.79943	28.1099	27.9138	27.8629	26.9071	27.103	27.2109
MSMEG_2658	-0.519652	1.24584	27.8112	27.3482	27.2884	26.7685	26.9908	27.1296
MSMEG_2727	-0.483347	2.69692	27.8761	27.8231	27.9247	27.3362	27.325	27.5126
MSMEG_2739	-1.14783	2.61131	25.8541	25.5816	25.7973	24.3531	24.5752	24.8612
MSMEG_3072	-0.414878	1.51679	24.8797	25.0601	25.2872	24.7207	24.6904	24.5714
MSMEG_3619	-1.37752	2.74284	28.7838	28.7379	28.7101	27.0645	27.3301	27.7047
MSMEG_3654	-1.07408	2.26935	24.0004	24.5893	24.5706	23.2503	23.3366	23.3511
MSMEG_4222	-0.908576	2.0083	26.9505	26.8053	26.7286	25.5866	25.9457	26.2264
MSMEG_4281	-0.980282	3.61028	26.2741	26.1803	26.2621	25.203	25.1684	25.4043
MSMEG_4328	-0.903218	2.58752	26.4551	26.4235	26.5888	25.8313	25.5042	25.4222
MSMEG_4340	0.869763	2.38304	26.5756	27.0482	26.7882	27.7805	27.6469	27.5938
MSMEG_4463	0.69559	2.12628	24.192	24.375	24.6502	25.0944	25.0357	25.174
MSMEG_4646	-1.28681	3.82688	25.5269	25.411	25.6606	24.1986	24.181	24.3585
MSMEG_5197	1.15999	2.4259	25.1596	25.3574	25.749	26.7323	26.5626	26.451
MSMEG_5239	-0.181735	0.572294	27.502	27.9381	27.6735	27.6384	27.5045	27.4254
MSMEG_5773	-0.185643	0.472719	24.632	24.5681	24.6989	24.294	24.779	24.2691
MSMEG_6094	0.820931	1.76888	24.7246	24.7511	25.1853	25.8827	25.8224	25.4187
MSMEG_6142	1.34728	2.57228	26.2273	26.9201	26.6153	27.9016	27.9992	27.9038
MSMEG_6404	1.2909	3.31233	26.0255	26.2128	26.397	27.5137	27.3883	27.6059
MSMEG_6511	0.275782	1.23433	26.3739	26.5583	26.6618	26.8633	26.682	26.8761
MSMEG_0313	0.519418	0.641869	23.478	24.4499	24.5445	24.4594	24.6579	24.9135
MSMEG_0826	0.361575	1.50467	25.7069	25.781	26.0384	26.2864	26.1216	26.2031
MSMEG_1517	-1.28566	3.6204	25.2036	25.0303	25.0704	23.6946	23.7633	23.9894
MSMEG_1603	0.123634	0.211601	26.7326	27.2856	26.7197	27.256	27.0424	26.8104
MSMEG_1610	0.708216	1.72683	25.5827	26.1205	26.0469	26.4712	26.7195	26.684
MSMEG_1662	1.39039	2.87463	25.7866	26.0884	26.346	27.4297	27.3729	27.5896
MSMEG_1735	1.34779	3.52274	25.7124	25.9289	25.8297	27.333	27.0005	27.1809
MSMEG_1819	1.63864	2.59287	25.1637	25.4533	25.8706	26.888	27.3385	27.1771
MSMEG_1957	-0.802764	3.08823	25.5058	25.4086	25.4748	24.5156	24.8054	24.6599
MSMEG_2383	-0.201811	0.835052	25.1818	25.2808	25.5517	25.1695	25.1048	25.1345
MSMEG_2449	1.56817	2.41973	23.9042	24.2559	24.7396	25.7272	25.8297	26.0474
MSMEG_2541	-1.12635	2.70362	29.3782	29.1093	28.8928	27.8946	28.1309	27.9757
MSMEG_2931	-1.07961	3.31197	25.8102	25.5997	25.8381	24.578	24.8115	24.6197
MSMEG_3025	-1.32282	3.98151	26.2719	26.0613	26.3152	24.8838	24.8374	24.9588
MSMEG_4180	0.422574	1.27621	25.2825	25.5614	25.2275	25.5598	25.826	25.9533
MSMEG_4200	0.721724	2.4075	24.4848	24.6523	24.8573	25.2784	25.4455	25.4356
MSMEG_4278	1.87526	2.53632	25.6644	26.2977	26.5695	27.8459	28.2091	28.1023
MSMEG_4327	0.668989	1.54935	27.7784	28.403	28.2674	28.9189	28.8252	28.7117
MSMEG_4891	-0.369891	1.08186	29.9859	29.9258	29.9647	29.3054	29.6031	29.8583
MSMEG_4916	0.999832	2.06054	24.0664	23.5637	23.8029	24.9182	24.9996	24.5148
MSMEG_5037	0.413769	2.20441	25.9865	25.8925	25.9501	26.2155	26.4638	26.3912
MSMEG_5070	-0.944601	2.03132	26.8118	26.4724	26.6748	25.4596	25.6192	26.0463
MSMEG_5250	0.475497	1.68041	24.9902	24.8999	24.9031	25.2128	25.3663	25.6406
MSMEG_5824	-0.606153	2.96874	25.4979	25.4714	25.4276	24.744	24.8527	24.9818
MSMEG_6008	0.149522	0.358808	26.2971	26.11	25.9332	25.993	26.4496	26.3463
MSMEG_6232	0.982517	1.44269	25.7601	24.6791	25.2256	26.1069	26.2163	26.2891
MSMEG_6518	-1.88463	3.63376	30.1911	30.0069	30.2625	28.0673	28.2287	28.5106
MSMEG_6933	-0.29038	0.74189	27.9775	27.6349	27.3893	27.4659	27.2732	27.3915
MSMEG_0158	0.599977	5.0528	25.0574	25.0525	25.0198	25.623	25.629	25.6776
MSMEG_0710	-1.80446	2.67066	28.9347	28.2906	28.1858	26.5135	26.621	26.8633
MSMEG_0769	0.820783	2.6201	25.8929	25.9786	26.2657	26.9132	26.7838	26.9024
MSMEG_1265	0.605787	1.67252	24.2618	24.4287	24.5949	25.2928	24.8454	24.9646
MSMEG_1416	-1.1058	3.28627	26.8615	26.7478	26.623	25.4851	25.6574	25.7724
MSMEG_2450	1.51608	2.69224	25.8398	26.2817	26.5645	27.7742	27.6971	27.763
MSMEG_2723	0.685468	2.64782	25.0306	24.9874	25.2605	25.6963	25.7686	25.87
MSMEG_3100	0.318008	0.764665	26.0153	25.7741	25.6929	26.0556	26.4655	25.9152
MSMEG_3247	-0.290148	3.90615	27.83	27.8461	27.8586	27.5243	27.5536	27.5863
MSMEG_3419	-1.3095	2.04788	27.7174	26.9487	27.4972	25.8267	26.0503	26.3578
MSMEG_4527	-0.709745	2.60214	25.7501	25.4959	25.6966	24.8111	25.0566	24.9457
MSMEG_4533	-0.0912857	0.24407	28.224	28.6813	28.6084	28.3316	28.4449	28.4634
MSMEG_4535	1.57017	3.18659	24.8212	24.9719	25.0537	26.8121	26.4111	26.3341
MSMEG_4633	1.55996	3.44356	24.27	24.437	24.5733	25.7743	26.0591	26.1267
MSMEG_4937	0.988871	2.39035	25.6647	25.5746	25.7926	26.9445	26.6433	26.4107
MSMEG_5715	0.825966	2.51026	26.6116	26.4977	26.8846	27.5993	27.4788	27.3937
MSMEG_5721	0.101891	0.311346	27.5176	27.8939	27.83	27.726	27.9515	27.8696
MSMEG_5782	-0.671496	2.48907	25.9011	25.8031	25.6315	25.0498	25.0217	25.2497
MSMEG_6074	-0.0424461	0.138036	25.3568	25.3323	25.2383	25.4813	25.1427	25.1761
MSMEG_6286	1.33172	2.784	25.8663	26.3452	26.164	27.2468	27.5213	27.6025
MSMEG_6452	-1.05053	3.17183	27.8476	27.7717	27.7166	26.5403	26.7473	26.8967
MSMEG_6783	1.83266	4.16562	25.6568	25.4297	25.4396	27.216	27.4822	27.3259
MSMEG_0035	-1.62622	2.63782	28.6913	28.1648	28.1393	26.412	26.7852	26.9195
MSMEG_0531	1.34192	3.53546	25.7741	25.7246	26.0371	27.286	27.1925	27.083
MSMEG_0643	-0.470043	1.59068	26.7374	26.492	26.2836	26.0681	25.9653	26.0695
MSMEG_0759	1.21027	3.41323	25.8589	26.1524	26.1927	27.3335	27.2237	27.2776
MSMEG_1484	-1.78008	3.63571	30.1505	29.839	30.0458	28.0696	28.1884	28.4371
MSMEG_1647	0.443571	1.77755	26.0415	26.3525	26.0791	26.569	26.7071	26.5275
MSMEG_1809	1.27901	4.94561	26.8943	26.8474	26.9759	28.1375	28.2381	28.1791
MSMEG_2086	0.191346	0.473735	26.3706	26.6302	26.2484	26.3501	26.8014	26.6717
MSMEG_2352	-0.32555	1.10468	31.8941	31.8586	31.7666	31.2523	31.6877	31.6028
MSMEG_2365	-1.14697	3.29785	27.8045	27.5435	27.5127	26.3878	26.4377	26.5942
MSMEG_2374	-0.201459	0.671043	27.1348	26.8305	27.0446	26.7266	26.6751	27.0038
MSMEG_2731	-1.86407	3.18622	27.2753	26.8184	27.1036	24.9825	25.1589	25.4636
MSMEG_3047	-0.701751	1.82733	24.1721	24.1953	24.464	23.8192	23.3228	23.5842
MSMEG_4306	0.260489	0.712199	26.8601	27.1544	26.6761	26.9751	27.2233	27.2736
MSMEG_4915	-0.186859	0.56667	24.897	24.713	25.0209	24.9206	24.5989	24.5509
MSMEG_5222	-0.920309	2.67884	26.553	26.3934	26.4722	25.4148	25.4482	25.7947
MSMEG_5847	0.825393	2.85039	25.6319	25.8135	25.7	26.7216	26.455	26.445
MSMEG_0314	0.623917	0.567625	23.5296	24.7913	24.9237	24.9718	25.4192	24.7253
MSMEG_0372	-0.754905	2.38487	26.922	26.7123	27.0706	26.1005	26.0471	26.2925
MSMEG_0732	-0.80716	2.09605	25.259	24.9567	25.051	24.1538	24.1335	24.5579
MSMEG_0777	0.524456	2.78395	27.4015	27.3591	27.3327	27.872	28.0115	27.7832
MSMEG_0935	0.74144	2.17092	27.8095	28.2607	27.9359	28.6597	28.8379	28.7328
MSMEG_1285	-0.757018	2.46585	25.4339	25.2409	25.5757	24.5158	24.7039	24.7597
MSMEG_1602	-1.03597	3.72524	26.1453	26.0821	26.1187	24.9309	25.1826	25.1247
MSMEG_1684	0.10567	0.21672	27.3403	27.4366	27.2766	27.095	27.581	27.6945
MSMEG_2695	-1.11337	3.06092	28.7362	28.6754	28.5639	27.6646	27.3173	27.6536
MSMEG_3084	0.0654984	0.205844	31.4379	31.3249	31.1906	31.2764	31.2902	31.5833
MSMEG_3217	0.931378	2.16057	24.8067	24.9788	25.3534	25.8096	26.0734	26.0499
MSMEG_3641	-1.25487	2.89829	24.903	24.6591	24.7123	23.2445	23.5593	23.706
MSMEG_4283	-1.10893	3.16505	29.2077	28.961	29.1787	27.9976	27.8613	28.1618
MSMEG_4700	-1.21846	3.12971	26.8153	26.5749	26.7117	25.5264	25.2719	25.6483
MSMEG_5442	1.03346	2.30894	24.0014	24.5568	24.4361	25.5019	25.3395	25.2534
MSMEG_6256	0.0286872	0.0735119	28.0946	28.2834	28.1364	28.0174	28.1455	28.4377
MSMEG_6410	1.40957	3.28282	25.3136	25.4942	25.7112	27.0696	26.8381	26.84
MSMEG_0001	0.337025	3.02922	26.7025	26.7407	26.8253	27.0915	27.0719	27.1161
MSMEG_0401	-0.186789	0.237817	25.1155	25.1854	25.6061	25.5988	25.0769	24.671
MSMEG_0690	-1.05546	3.12712	25.8214	25.6009	25.6629	24.7388	24.7256	24.4544
MSMEG_1574	0.927642	3.71919	26.1755	26.1186	26.2345	27.2039	26.9908	27.1169
MSMEG_2758	-1.14546	2.78608	27.5941	27.4185	27.484	26.0898	26.3913	26.579
MSMEG_3125	0.879266	2.8832	25.2837	25.5585	25.3438	26.3586	26.1333	26.3319
MSMEG_4217	-1.62726	3.04293	30.8913	30.5033	30.4067	28.8394	28.8899	29.1903
MSMEG_4959	0.0598571	0.299458	26.0993	26.089	26.2321	26.3068	26.2163	26.077
MSMEG_5211	0.779382	1.85123	24.0511	24.4604	24.6484	25.2854	25.139	25.0737
MSMEG_5249	1.81484	3.35998	27.2203	27.7473	27.644	29.2955	29.4601	29.3006
MSMEG_5270	0.818916	1.7457	26.0008	26.6333	26.1247	26.9498	27.2362	27.0295
MSMEG_5427	1.49984	3.13282	26.0043	26.5502	26.2591	27.71	27.7871	27.816
MSMEG_5525	1.11775	2.21464	29.3036	29.8473	29.9705	30.7275	30.8497	30.8974
MSMEG_5841	1.03248	2.6596	26.1627	26.4254	26.4691	27.1659	27.4522	27.5365
MSMEG_6458	1.19338	2.23829	25.2941	25.6185	26.0134	26.7946	26.9851	26.7265
MSMEG_1665	0.693699	1.85056	26.4295	26.8784	26.3426	27.2159	27.2545	27.2613
MSMEG_2136	0.227948	0.90789	25.4535	25.5984	25.5566	25.5465	25.8614	25.8844
MSMEG_3101	1.33309	3.0371	25.9674	25.8653	26.2376	27.5582	27.2912	27.2201
MSMEG_3257	0.153216	0.384069	27.5892	27.2053	27.3964	27.3199	27.5764	27.7542
MSMEG_4918	3.57229	2.5632	22.4562	21.9541	22.5216	26.4996	26.2801	24.869
MSMEG_4939	-0.0756823	0.42569	26.36	26.3856	26.2725	26.1839	26.2087	26.3984
MSMEG_4954	-1.89522	4.35838	27.8071	27.5632	27.7212	25.799	25.6848	25.922
MSMEG_5515	1.93758	2.76285	26.0002	25.6943	26.5767	28.06	27.982	28.0419
MSMEG_6507	1.32266	3.84958	26.1771	25.8946	26.0871	27.3758	27.4466	27.3043
MSMEG_0006	-0.834271	2.99227	25.5161	25.2087	25.44	24.595	24.5725	24.4944
MSMEG_1670	1.6197	3.40525	26.9031	27.0744	27.2911	28.8998	28.6347	28.5932
MSMEG_2378	-0.466264	2.28407	26.6118	26.6146	26.5631	26.2363	25.9677	26.1866
MSMEG_2611	1.03896	3.71789	24.7736	24.7441	24.9795	25.8209	25.8793	25.9139
MSMEG_3159	0.343398	1.75788	26.602	26.8001	26.8747	27.0863	27.1664	27.0542
MSMEG_3632	1.77439	3.34505	26.2809	26.6974	26.6211	28.2467	28.5181	28.1578
MSMEG_4464	0.607936	2.60802	25.1181	25.209	25.1705	25.852	25.6027	25.8668
MSMEG_4485	1.61641	2.47484	25.9264	26.2211	26.7579	27.7882	27.8803	28.086
MSMEG_5839	1.24109	3.44944	25.4481	25.4487	25.7788	26.8116	26.7928	26.7944
MSMEG_6242	0.42543	0.877824	30.9098	30.5502	30.8003	31.553	30.8742	31.1095
MSMEG_0903	1.48069	2.98949	26.3542	26.6913	26.9316	28.0642	28.2154	28.1394
MSMEG_2351	-0.425457	1.91522	31.7576	31.6587	31.4633	31.137	31.2896	31.1766
MSMEG_3777	0.284045	0.597853	25.5674	25.8305	26.0899	25.8551	26.374	26.1108
MSMEG_4474	1.123	3.61709	25.5709	25.4422	25.6502	26.7803	26.7007	26.5514
MSMEG_4956	0.407768	1.87707	27.853	28.0748	27.8048	28.2278	28.3353	28.3928
MSMEG_5199	0.159651	0.756239	28.3849	28.353	28.2793	28.3197	28.6239	28.5527
MSMEG_5415	-0.0333252	0.0881715	30.788	30.924	30.6852	30.5415	30.8326	30.9232
MSMEG_6271	0.856911	1.93586	25.4323	26.0348	25.8608	26.6955	26.7204	26.4827
MSMEG_0899	2.62752	4.84197	23.9868	23.8646	23.9821	26.5526	26.7465	26.4169
MSMEG_2367	-0.250162	1.46157	27.6664	27.8461	27.7108	27.3831	27.5829	27.5068
MSMEG_3158	0.235252	0.771357	26.7699	26.7231	26.9949	26.8764	27.0511	27.2661
MSMEG_3634	0.550117	1.47249	26.5434	27.004	26.5335	27.1526	27.3968	27.1819
MSMEG_4630	-0.0778955	0.25769	24.7432	24.9287	25.0123	24.9768	24.8091	24.6646
MSMEG_4920	0.813646	1.90297	28.4307	29.0101	28.7531	29.7054	29.5207	29.4088
MSMEG_5240	0.693073	2.7884	28.8114	28.8065	29.0829	29.604	29.5876	29.5884
MSMEG_5789	2.04016	3.3269	28.9147	29.5363	29.3594	31.4275	31.2853	31.2181
MSMEG_1401	0.00529798	0.0105959	31.4657	31.7209	31.8307	31.5067	31.6067	31.9197
MSMEG_1524	-0.483801	1.58641	29.5268	29.637	29.3546	28.8355	29.0046	29.2269
MSMEG_1547	0.374971	0.49109	27.4904	26.8215	26.6938	27.7276	26.9632	27.4398
MSMEG_3642	1.08918	2.34834	26.1314	26.5544	26.7732	27.6022	27.5638	27.5605
MSMEG_3864	1.0234	2.13793	24.4493	24.795	25.089	25.957	25.7776	25.6689
MSMEG_4290	1.70499	3.56775	28.6159	28.8106	29.0003	30.6885	30.4361	30.4171
MSMEG_5541	1.32784	3.93528	27.2348	27.222	27.352	28.7516	28.546	28.4948
MSMEG_5672	1.05267	3.35102	28.5683	28.5671	28.7492	29.8353	29.5786	29.6286
MSMEG_6179	0.209484	0.221278	28.4175	27.8241	28.0504	28.8979	27.772	28.2506
MSMEG_6904	0.629337	1.21208	28.8192	29.6353	29.0837	29.7395	29.8031	29.8836
MSMEG_1813	2.10509	2.74995	27.4601	28.1118	28.3945	30.1718	29.9622	30.1477
MSMEG_2520	-0.99261	3.94069	31.1507	31.1366	31.0191	30.0258	30.2027	30.1001
MSMEG_3085	0.375121	1.0777	29.2423	29.3606	29.1927	29.3355	29.8492	29.7362
MSMEG_4323	0.866369	1.43537	25.1565	25.3851	25.5976	26.5262	26.465	25.7471
MSMEG_6391	1.82267	2.38251	26.4843	26.6822	27.1637	29.0289	28.5471	28.222
MSMEG_6393	-0.491437	2.05407	27.7806	27.5825	27.938	27.2852	27.2678	27.2739
MSMEG_2621	0.197529	0.64194	26.166	26.2975	26.4499	26.6099	26.6182	26.2779
MSMEG_4674	-1.15861	2.92032	30.1232	29.8471	29.9978	28.5979	28.9514	28.943
MSMEG_0911	1.72564	2.22903	28.5752	28.9918	29.6466	30.9268	30.6411	30.8227
MSMEG_2412	1.13796	2.57871	26.0697	26.2587	26.3945	27.6523	27.312	27.1725
MSMEG_3507	-0.709554	2.52917	31.1094	31.0191	31.0892	30.1623	30.4022	30.5245
MSMEG_4938	0.363895	1.10664	29.2185	29.5086	29.5892	29.5978	29.8577	29.9524
MSMEG_6157	-1.13955	4.62247	26.0578	25.9423	26.0372	24.8331	24.9461	24.8396
MSMEG_5049	-0.550318	1.82314	26.17	26.0637	26.2439	25.6724	25.3693	25.785
MSMEG_1881	-0.761548	3.14794	26.9322	26.9947	26.948	26.0844	26.1575	26.3485
MSMEG_2839	-0.837081	2.52518	27.4943	27.3225	27.4489	26.3573	26.6364	26.7608
MSMEG_4185	0.866771	2.96185	25.3601	25.0657	25.3376	26.0401	26.1559	26.1677
MSMEG_4936	0.912844	1.98681	28.307	28.515	28.8881	29.2721	29.5886	29.5879
MSMEG_3055	0.893352	2.06893	29.4586	29.8867	29.396	30.299	30.6554	30.4669
MSMEG_3461	0.985352	1.92781	27.016	26.3383	26.6044	27.4901	27.5769	27.8477
MSMEG_3640	1.18459	2.80186	28.1067	28.6137	28.5137	29.5959	29.5885	29.6036
MSMEG_6091	-0.263652	1.08937	27.2755	27.1777	27.1272	26.9067	26.7604	27.1224
MSMEG_0229	1.2411	2.47296	27.5475	27.6984	28.0417	29.2433	28.7765	28.9911
MSMEG_0234	1.28799	3.59317	27.2353	27.4406	27.5262	28.8012	28.596	28.6687
MSMEG_0406	0.717518	2.30401	28.7071	28.7871	28.9584	29.7398	29.4673	29.3981
MSMEG_1583	-1.06538	2.99609	30.7216	30.5731	30.636	29.4052	29.5299	29.7994
MSMEG_3833	-0.490404	1.8246	30.2956	30.4016	30.3823	29.663	29.8832	30.062
MSMEG_5273	0.266769	2.10693	29.865	30.0196	29.9025	30.2015	30.2401	30.1458
MSMEG_1807	1.04358	2.08954	29.6026	30.1421	30.006	31.2076	30.9485	30.7253
MSMEG_0255	1.20662	3.77594	28.9735	29.0172	29.0703	30.375	30.2215	30.0844
MSMEG_6384	0.650718	2.88899	28.1361	28.3086	28.2072	28.743	28.9497	28.9113
MSMEG_3103	1.17807	4.27569	29.1835	29.3086	29.2096	30.5134	30.3407	30.3817
MSMEG_3169	1.33891	3.41086	25.5513	25.6961	25.8341	27.2133	26.9466	26.9384
MSMEG_0402	-0.694701	1.02307	25.1286	25.0439	25.2669	25.0534	24.295	24.0069
MSMEG_6917	0.791434	2.38464	27.0619	27.116	27.2677	28.1773	27.8397	27.8029
MSMEG_4690	1.87868	3.36216	27.4863	27.6386	27.9804	29.7442	29.5912	29.4059
MSMEG_5720	0.520736	0.952122	27.9376	28.3355	28.4928	29.0381	28.8963	28.3937
MSMEG_0709	-0.4182	1.29345	31.2913	31.336	31.1024	30.5775	30.8617	31.0358
MSMEG_0880	-1.15778	3.53284	33.2197	32.9864	33.1094	31.8483	31.9086	32.0852
MSMEG_1654	1.64664	2.99385	28.4635	28.6144	29.0014	30.5046	30.3719	30.1426
MSMEG_6392	-0.36319	1.48348	26.7831	26.5683	26.5604	26.2674	26.1271	26.4278
MSMEG_1368	-0.590785	1.19511	27.1847	27.109	27.4612	27.0732	26.4447	26.4647
MSMEG_1367	-1.02844	4.67971	28.3131	28.2653	28.4011	27.3286	27.2601	27.3055
MSMEG_2656	0.634996	1.12877	28.6826	29.2669	29.3598	29.6799	30.0368	29.4977
MSMEG_0400	-0.0195808	0.0158583	25.8499	25.7516	26.3758	26.6403	25.8758	25.4025
MSMEG_6459	1.38466	2.22621	27.0333	27.1702	27.5162	29.0005	28.621	28.2521
MSMEG_3143	0.810061	2.8405	30.2639	30.554	30.3292	31.1229	31.1536	31.3008
MSMEG_4757	1.63852	2.42909	29.5371	29.7771	30.1295	31.8549	31.3461	31.1583

## Sheet: Nor 25hr
			Drug-free control replicates			Drug-treated replicates				Proteins exclusively absent in drug-treated samples	Proteins exclusively present in drug-treated samples
Majority protein IDs	log2 Fold Difference(drug/drug free control)	Negative log10 p value	LFQ intensity 3	LFQ intensity 4	LFQ intensity 5	LFQ intensity 7	LFQ intensity 9	LFQ intensity 10		MSMEG_0491	MSMEG_0033
MSMEG_0001	0.827311	1.95335	25.7504	25.47	25.6037	26.2588	26.2785	26.7686		MSMEG_1563	MSMEG_0091
MSMEG_0002	2.57596	3.68059	23.1069	23.3961	23.4817	26.1247	25.5825	26.0054		MSMEG_1629	MSMEG_0129
MSMEG_0006	-1.26707	4.02525	25.0872	25.0941	25.1803	23.9816	23.8553	23.7235		MSMEG_2176	MSMEG_0214
MSMEG_0020	-0.384217	1.17616	24.1957	24.2521	24.2383	23.8735	24.0931	23.5667		MSMEG_2642	MSMEG_0247
MSMEG_0023	-0.842979	1.1339	23.2203	22.9535	23.7017	22.362	22.0261	22.9584		MSMEG_2648	MSMEG_0320
MSMEG_0024	-0.480422	1.15622	30.3135	30.7098	30.8579	30.3087	29.9406	30.1907		MSMEG_2961	MSMEG_0436
MSMEG_0028	-1.00299	1.68858	21.8691	22.3511	22.5429	20.8907	21.4385	21.4251		MSMEG_3328	MSMEG_0590
MSMEG_0030	-0.598975	2.03576	21.1834	21.0067	21.3856	20.5032	20.5576	20.718		MSMEG_3426	MSMEG_0679
MSMEG_0035	-1.81929	3.66369	28.1816	27.9367	28.3119	26.4958	26.2884	26.1881		MSMEG_3819	MSMEG_0956
MSMEG_0048	-0.261533	0.808169	21.7163	21.9551	22.1595	21.8314	21.6435	21.5713		MSMEG_4322	MSMEG_1102
MSMEG_0052	-1.21716	1.68118	22.3572	23.3259	22.3565	21.5095	21.5392	21.3395		MSMEG_4487	MSMEG_1120
MSMEG_0058	-2.20425	3.24601	25.8329	25.5329	26.2478	23.8145	23.5567	23.6297		MSMEG_4570	MSMEG_1370
MSMEG_0059	-1.31737	2.77299	22.4302	22.2175	22.4142	20.7788	20.9965	21.3345		MSMEG_5238	MSMEG_1451
MSMEG_0065	-1.47901	1.94051	29.1593	28.1794	29.0985	27.371	27.4953	27.1338		MSMEG_6519	MSMEG_1656
MSMEG_0066	-1.40913	3.0432	26.3891	26.4057	26.8377	25.0234	25.1436	25.2381		MSMEG_6601	MSMEG_2019
MSMEG_0067	-1.71025	2.81081	24.7397	24.4851	25.1731	22.8985	23.1606	23.2081		MSMEG_0063	MSMEG_2046
MSMEG_0069	-1.57121	1.64709	24.5495	23.3609	24.2988	22.8017	22.6734	22.0206		MSMEG_0078	MSMEG_2279
MSMEG_0076	-0.720284	2.05859	25.9278	26.2304	26.3509	25.5396	25.2846	25.5241		MSMEG_0087	MSMEG_2422
MSMEG_0077	-2.28792	3.97296	24.1198	23.9513	24.2305	21.5616	21.9299	21.9463		MSMEG_0363	MSMEG_2467
MSMEG_0081	-0.969595	2.53794	24.1966	24.2061	24.6256	23.4145	23.4269	23.278		MSMEG_0456	MSMEG_2488
MSMEG_0084	-1.22569	3.3814	27.8974	27.7586	28.0494	26.6561	26.5553	26.8169		MSMEG_0532	MSMEG_2493
MSMEG_0085	-1.94248	1.88389	22.1921	22.8396	23.7408	20.9194	21.1401	20.8855		MSMEG_0660	MSMEG_2512
MSMEG_0088	-0.950188	1.39266	22.4148	22.5126	23.2733	21.8031	21.4861	22.0608		MSMEG_0699	MSMEG_2548
MSMEG_0095	0.253063	0.792557	22.2627	22.4552	22.0062	22.4549	22.6295	22.3989		MSMEG_0897	MSMEG_2913
MSMEG_0096	-1.71646	2.99011	22.5536	23.06	23.2155	21.2245	21.1982	21.2571		MSMEG_0964	MSMEG_2914
MSMEG_0097	-0.621342	1.83591	21.4029	21.64	21.4929	20.9749	21.0687	20.6282		MSMEG_0970	MSMEG_2949
MSMEG_0100	-1.83807	3.34502	23.2559	23.3135	23.6466	21.4687	21.4196	21.8136		MSMEG_1063	MSMEG_3024
MSMEG_0102	1.0688	1.50596	23.0575	23.4554	23.9619	24.9428	24.2794	24.459		MSMEG_1261	MSMEG_3113
MSMEG_0108	0.998958	2.29717	23.8532	23.977	24.3111	24.8476	25.2472	25.0434		MSMEG_1286	MSMEG_3214
MSMEG_0114	-0.947442	2.82624	23.9203	24.2924	24.0331	23.2394	23.0695	23.0946		MSMEG_1378	MSMEG_3226
MSMEG_0127	0.0452633	0.0427477	25.7918	26.1823	25.0014	25.8638	25.5253	25.7223		MSMEG_1618	MSMEG_3379
MSMEG_0131	1.3917	2.13704	24.9647	24.6822	25.2206	26.1372	26.1016	26.8038		MSMEG_1758	MSMEG_3607
MSMEG_0146	-1.04143	1.88301	24.4285	24.7534	24.3365	23.8823	23.2843	23.2274		MSMEG_1913	MSMEG_3611
MSMEG_0158	1.25057	2.5083	24.8797	24.62	24.944	26.083	25.7635	26.349		MSMEG_2075	MSMEG_3692
MSMEG_0166	-0.230632	1.39279	22.6833	22.7654	22.9449	22.5682	22.5671	22.5665		MSMEG_2194	MSMEG_3783
MSMEG_0187	-0.64343	0.977303	23.7392	24.36	23.3091	23.2519	23.1141	23.1121		MSMEG_2209	MSMEG_3861
MSMEG_0194	-2.93094	3.14823	25.7985	26.0889	26.6555	23.1053	23.6145	23.0303		MSMEG_2392	MSMEG_3995
MSMEG_0212	-0.665611	2.35384	24.9132	25.1517	24.833	24.4183	24.1994	24.2833		MSMEG_2604	MSMEG_4059
MSMEG_0215	0.197639	0.4297	23.5399	23.8465	23.1872	23.6919	23.6567	23.818		MSMEG_2743	MSMEG_4123
MSMEG_0216	0.863588	2.18141	26.9465	27.3484	27.1503	28.2146	28.0204	27.8009		MSMEG_2929	MSMEG_4214
MSMEG_0224	1.50075	2.32615	23.8707	24.7096	24.145	25.6211	25.9251	25.6814		MSMEG_3119	MSMEG_4269
MSMEG_0229	1.97814	3.81529	26.6155	26.4439	26.8293	28.4794	28.5686	28.7752		MSMEG_3121	MSMEG_4284
MSMEG_0230	-0.413496	0.759179	23.7891	24.1716	23.5046	23.3799	23.6973	23.1475		MSMEG_3271	MSMEG_4302
MSMEG_0231	-0.367643	1.76069	22.6438	22.8601	22.5495	22.3558	22.2954	22.2994		MSMEG_3336	MSMEG_4556
MSMEG_0233	-0.300991	1.12166	26.8509	27.2122	26.8717	26.6141	26.6484	26.7693		MSMEG_3482	MSMEG_5005
MSMEG_0234	1.86223	3.30635	25.7675	25.6046	25.7156	27.2394	27.5984	27.8367		MSMEG_3491	MSMEG_5021
MSMEG_0238	0.5263	1.65823	23.0862	22.9018	23.2269	23.4278	23.5628	23.8031		MSMEG_3768	MSMEG_5027
MSMEG_0239	3.39623	4.39147	22.4443	22.0232	22.4286	25.5006	25.8662	25.7181		MSMEG_3848	MSMEG_5130
MSMEG_0242	-2.42854	3.92993	24.0903	24.0177	24.3027	21.6621	21.495	21.968		MSMEG_3863	MSMEG_5172
MSMEG_0243	-1.67961	2.7003	30.7595	30.5435	31.3152	29.1699	29.2777	29.1317		MSMEG_3883	MSMEG_5231
MSMEG_0250	-1.89255	4.04965	24.6086	24.3354	24.5863	22.471	22.6375	22.7441		MSMEG_3897	MSMEG_5247
MSMEG_0251	-0.721055	2.80295	23.4735	23.4891	23.5648	22.758	22.9568	22.6493		MSMEG_3958	MSMEG_5325
MSMEG_0252	-0.547789	1.5656	22.9575	23.0063	22.894	22.6844	22.1388	22.3913		MSMEG_4172	MSMEG_5330
MSMEG_0255	1.86703	4.35621	28.0792	27.8218	27.7712	29.7265	29.7496	29.7973		MSMEG_4265	MSMEG_5355
MSMEG_0261	1.66234	2.2365	21.7813	22.1123	22.3222	23.4855	23.4505	24.2667		MSMEG_4286	MSMEG_5359
MSMEG_0269	-0.364204	2.30864	23.2392	23.2971	23.2488	22.9007	23.0036	22.7882		MSMEG_4428	MSMEG_5371
MSMEG_0272	-1.65639	2.52619	23.2287	22.6686	22.6468	20.876	21.2295	21.4696		MSMEG_4653	MSMEG_5413
MSMEG_0282	-1.82796	3.17657	26.0996	26.0197	26.3512	24.6471	24.11	24.2296		MSMEG_5010	MSMEG_5454
MSMEG_0284	1.47957	2.73896	20.4035	19.858	20.4332	21.6629	21.6132	21.8573		MSMEG_5042	MSMEG_5490
MSMEG_0301	1.25643	2.39803	22.6306	22.036	22.3678	23.4527	23.507	23.8439		MSMEG_5285	MSMEG_5492
MSMEG_0309	-0.626671	3.30592	23.2849	23.2595	23.2115	22.703	22.658	22.515		MSMEG_5568	MSMEG_5649
MSMEG_0312	-0.596317	1.2678	23.8601	23.7737	23.1708	23.049	23.0435	22.9232		MSMEG_5775	MSMEG_5728
MSMEG_0313	-0.60338	1.527	23.199	23.2648	23.3012	22.3726	22.5942	22.988		MSMEG_6099	MSMEG_5886
MSMEG_0314	0.242819	0.406488	23.4977	23.4026	24.1105	23.9146	24.1245	23.7002		MSMEG_6201	MSMEG_6014
MSMEG_0317	-0.575825	2.49844	23.7894	23.7705	23.63	23.0537	23.1062	23.3024		MSMEG_6249	MSMEG_6015
MSMEG_0338	1.47083	2.05405	20.5018	20.3232	20.4637	21.673	21.5269	22.5014		MSMEG_6269	MSMEG_6078
MSMEG_0361	-1.04798	3.8669	27.2628	27.2807	27.3295	26.3629	26.246	26.1202		MSMEG_6277	MSMEG_6104
MSMEG_0365	-1.57571	2.76832	24.2973	23.9227	24.6096	22.7907	22.5628	22.749		MSMEG_6302	MSMEG_6110
MSMEG_0366	-0.820603	1.46953	24.6624	24.027	24.8663	23.8079	23.6672	23.6187		MSMEG_6862	MSMEG_6203
MSMEG_0371	-1.10836	2.14891	23.1968	22.8254	23.5652	21.9987	22.1476	22.1161			MSMEG_6327
MSMEG_0373	-0.730232	1.88546	22.8942	22.7423	22.6825	22.074	21.7526	22.3016			MSMEG_6340
MSMEG_0380	-1.2062	3.24624	24.3665	24.1105	24.5015	23.1965	23.0859	23.0775			MSMEG_6381
MSMEG_0386	2.20127	3.03781	24.1786	24.1908	24.2543	25.9317	26.5263	26.7694			MSMEG_6409
MSMEG_0388	-0.414062	1.51735	22.9783	22.8569	22.8998	22.3516	22.7377	22.4035			MSMEG_6481
MSMEG_0394	-0.54277	1.67922	24.2096	24.1577	23.9494	23.4536	23.4255	23.8093			MSMEG_6487
MSMEG_0399	-1.41561	2.56703	26.9407	26.7556	26.9158	25.3671	25.8477	25.1504			MSMEG_6649
MSMEG_0400	-0.244609	0.388186	24.5845	24.7022	25.294	24.3352	24.8452	24.6665			MSMEG_6761
MSMEG_0401	-0.284137	0.52454	23.6531	23.7642	24.1825	23.2453	23.8349	23.6671			MSMEG_6780
MSMEG_0402	-0.861068	1.20168	24.2855	24.2022	24.6031	22.9482	23.5247	24.0347			MSMEG_0014
MSMEG_0406	1.20489	3.23875	24.9909	25.254	25.095	26.3416	26.4683	26.1446			MSMEG_0221
MSMEG_0409	-0.329131	1.45091	20.8367	20.8496	21.151	20.6566	20.5748	20.6186			MSMEG_0257
MSMEG_0412	-2.13062	4.775	23.5359	23.5459	23.65	21.3964	21.6022	21.3413			MSMEG_0334
MSMEG_0415	-0.219821	0.682061	23.1397	23.3867	23.4799	23.3253	22.9873	23.0342			MSMEG_0362
MSMEG_0418	1.61948	1.16006	22.3578	22.0426	21.9602	23.0823	23.1068	25.03			MSMEG_0404
MSMEG_0422	1.59504	2.34026	22.535	23.0296	22.1437	24.2581	24.2852	23.9501			MSMEG_0580
MSMEG_0435	-0.361837	1.48897	21.675	21.7928	21.4474	21.3742	21.2315	21.224			MSMEG_0581
MSMEG_0441	-0.554226	1.42128	24.4924	24.4734	24.5773	23.9499	24.2746	23.6559			MSMEG_0600
MSMEG_0445	1.51186	3.00877	23.4849	23.7033	23.1076	24.9737	24.9233	24.9345			MSMEG_0608
MSMEG_0447	-0.934722	1.27915	25.2293	24.7195	25.429	24.4255	24.4951	23.6529			MSMEG_0655
MSMEG_0451	-2.39548	3.22086	26.9029	26.24	26.9214	24.192	24.2014	24.4843			MSMEG_0784
MSMEG_0455	-1.15503	1.76271	23.3116	23.3886	23.5524	21.7227	22.6967	22.3682			MSMEG_0883
MSMEG_0464	-0.668634	1.14486	25.9402	26.2863	26.1051	25.0076	25.8933	25.4247			MSMEG_1100
MSMEG_0472	-1.70997	4.09193	22.2703	22.3065	22.3997	20.7629	20.4329	20.6508			MSMEG_1114
MSMEG_0505	-0.374138	0.866384	22.5	22.0896	21.8988	21.7485	21.6491	21.9683			MSMEG_1327
MSMEG_0531	1.40147	2.49728	24.1624	24.0003	24.4774	25.4305	25.4568	25.9572			MSMEG_1328
MSMEG_0536	-1.60544	4.35336	26.3407	26.1923	26.2908	24.8085	24.6301	24.5689			MSMEG_1419
MSMEG_0539	-0.359811	1.7485	22.6621	22.499	22.559	22.0955	22.365	22.1801			MSMEG_1695
MSMEG_0550	-0.884429	3.38365	27.302	27.2204	27.4293	26.3482	26.4152	26.5349			MSMEG_1734
MSMEG_0551	-0.276839	0.440852	22.3512	22.8538	22.9971	22.334	22.8212	22.2165			MSMEG_1773
MSMEG_0559	-0.223632	0.153574	28.6315	29.5176	28.7387	29.1234	29.2839	27.8095			MSMEG_1811
MSMEG_0599	-1.33758	3.66314	22.5579	22.5651	22.2926	21.1992	21.0265	21.1772			MSMEG_1910
MSMEG_0603	0.841096	2.71488	22.6404	22.5232	22.6741	23.3332	23.3613	23.6665			MSMEG_1940
MSMEG_0636	-0.723279	1.6233	25.3711	25.8541	25.3826	25.0572	24.7515	24.6292			MSMEG_2224
MSMEG_0638	-1.59053	2.61092	22.5022	21.7433	22.3672	20.6376	20.595	20.6086			MSMEG_2252
MSMEG_0639	-0.789227	1.94074	23.1137	23.2182	23.3964	22.2432	22.3543	22.7632			MSMEG_2443
MSMEG_0640	-0.32548	1.92077	23.7731	23.9442	23.9215	23.4788	23.5304	23.6533			MSMEG_2465
MSMEG_0643	0.178327	0.770577	26.1025	26.1279	25.9126	26.0951	26.3773	26.2057			MSMEG_2595
MSMEG_0665	0.12719	0.25222	21.4108	21.3772	20.8245	21.2106	21.3647	21.4188			MSMEG_2601
MSMEG_0670	0.09762	0.243277	21.1843	21.5581	21.3723	21.587	21.5834	21.2372			MSMEG_2620
MSMEG_0678	-0.244097	0.749638	22.6542	22.6121	22.3908	22.3869	22.063	22.475			MSMEG_2738
MSMEG_0682	0.227151	0.612672	21.3284	21.5534	21.1572	21.6011	21.3522	21.767			MSMEG_2826
MSMEG_0683	-0.616037	2.4519	24.4977	24.6385	24.3834	24.0239	23.8049	23.8427			MSMEG_2901
MSMEG_0686	-1.63228	2.97087	22.5306	23.1194	23.0267	21.3782	21.2316	21.17			MSMEG_2938
MSMEG_0690	-1.21233	2.8853	24.8346	24.899	25.265	23.9103	23.6704	23.7808			MSMEG_2988
MSMEG_0692	-1.45825	3.11347	24.2831	24.2287	24.4807	22.6468	23.1243	22.8466			MSMEG_3043
MSMEG_0702	1.81032	4.04345	26.3664	26.3239	26.1619	28.0667	27.9456	28.2709			MSMEG_3114
MSMEG_0703	-1.53311	4.83807	25.3193	25.2983	25.4676	23.7959	23.8863	23.8037			MSMEG_3184
MSMEG_0709	-0.106171	0.177575	30.5195	30.6278	29.9931	30.4499	30.313	30.0589			MSMEG_3376
MSMEG_0710	-1.63304	3.10791	28.2375	28.4486	28.7262	27.0264	26.8329	26.6538			MSMEG_3397
MSMEG_0711	-1.93996	3.77587	22.8813	22.8044	23.0988	21.0828	21.1162	20.7657			MSMEG_3400
MSMEG_0717	-0.58503	1.37016	23.585	23.886	23.7617	23.4034	23.2644	22.8098			MSMEG_3532
MSMEG_0732	-1.09284	4.30729	25.3493	25.3086	25.1698	24.2246	24.1475	24.1771			MSMEG_3576
MSMEG_0741	-2.12725	3.96926	24.9212	24.8276	25.2602	22.8014	22.8651	22.9607			MSMEG_3580
MSMEG_0752	0.200949	0.364036	23.6892	24.074	23.2968	23.8734	23.8041	23.9854			MSMEG_3628
MSMEG_0753	-0.923621	2.16834	22.2705	22.3395	22.366	21.1196	21.7291	21.3565			MSMEG_3844
MSMEG_0754	-2.10129	3.39417	27.3073	27.0469	27.6681	25.2948	25.3216	25.102			MSMEG_3880
MSMEG_0759	1.74552	3.55848	24.9039	24.5366	24.6894	26.3305	26.385	26.651			MSMEG_3885
MSMEG_0766	1.33875	3.80007	23.3217	23.0689	23.2701	24.49	24.5116	24.6754			MSMEG_4014
MSMEG_0768	-0.101491	0.156984	26.1997	26.6162	25.9051	26.3747	25.9403	26.1016			MSMEG_4043
MSMEG_0769	1.19801	2.1895	25.1766	24.8736	25.2082	25.9691	26.2181	26.6652			MSMEG_4128
MSMEG_0777	0.817738	3.49793	26.6653	26.6084	26.698	27.5595	27.3459	27.5195			MSMEG_4518
MSMEG_0779	-1.25533	1.46605	21.8583	21.8398	22.8535	20.5606	21.3011	20.9238			MSMEG_4663
MSMEG_0783	0.703004	1.87203	22.438	22.1699	22.6752	23.1108	23.0034	23.278			MSMEG_4665
MSMEG_0789	-0.830445	2.02141	23.6362	23.6319	23.1481	22.7883	22.5702	22.5663			MSMEG_4717
MSMEG_0793	-0.968498	2.52574	25.8734	26.0388	25.8006	24.842	25.1976	24.7676			MSMEG_4973
MSMEG_0806	-0.898319	2.15563	22.6095	22.2511	22.5948	21.7094	21.7274	21.3237			MSMEG_5170
MSMEG_0819	1.6595	2.67608	21.4443	21.1009	21.446	23.0676	23.2989	22.603			MSMEG_5216
MSMEG_0824	0.00069046	0.00133859	21.5039	21.4606	21.6876	21.8575	21.3859	21.4107			MSMEG_5243
MSMEG_0825	1.44257	3.74117	23.772	24.1123	23.9229	25.316	25.3546	25.4642			MSMEG_5491
MSMEG_0826	0.879966	1.98227	25.0708	24.8644	25.0619	25.6756	25.7208	26.2406			MSMEG_5590
MSMEG_0828	-2.05607	3.66154	25.6091	25.4262	25.6241	23.7315	23.2228	23.5368			MSMEG_5593
MSMEG_0832	-2.18828	3.76486	25.6313	25.4811	26.0147	23.5769	23.507	23.4784			MSMEG_5687
MSMEG_0833	-1.47316	3.92964	22.4083	22.2161	22.1697	20.8915	20.8175	20.6657			MSMEG_5827
MSMEG_0834	-1.19814	2.47366	24.931	24.6955	24.8662	23.2754	23.8135	23.8093			MSMEG_5922
MSMEG_0835	-0.319225	1.11003	25.5401	25.2771	25.5581	24.9691	25.1324	25.3161			MSMEG_6003
MSMEG_0839	-0.865743	3.52813	22.4277	22.5927	22.3798	21.6044	21.5385	21.6601			MSMEG_6017
MSMEG_0859	-0.0583369	0.0726914	26.3419	26.6688	25.8884	26.5399	26.2227	25.9615			MSMEG_6039
MSMEG_0862	-1.02522	3.43359	24.1825	24.4319	24.2337	23.3602	23.2157	23.1963			MSMEG_6086
MSMEG_0863	-1.92278	3.74707	23.8857	23.6424	24.1379	21.9767	21.9452	21.9757			MSMEG_6107
MSMEG_0867	1.14791	1.10771	21.7005	22.2616	21.5395	22.1989	23.043	23.7035			MSMEG_6177
MSMEG_0876	-1.25175	2.67675	23.0096	22.6361	23.2373	21.7485	21.6654	21.714			MSMEG_6208
MSMEG_0877	-0.109519	0.296103	25.3768	25.4039	24.9454	25.0919	25.1448	25.1608			MSMEG_6243
MSMEG_0880	-0.768739	1.67874	32.9011	32.9177	33.2346	32.402	32.4503	31.895			MSMEG_6303
MSMEG_0882	-1.57271	2.78162	23.459	23.3225	23.6069	21.5359	21.9406	22.1939			MSMEG_6311
MSMEG_0884	-0.801903	1.90025	24.6764	24.8804	24.3992	23.9678	23.6034	23.9791			MSMEG_6317
MSMEG_0887	0.641942	1.57983	21.3854	21.9686	21.732	22.4852	22.3089	22.2178			MSMEG_6454
MSMEG_0889	-0.328938	1.01855	21.623	21.4315	21.8916	21.2359	21.2605	21.4628			MSMEG_6590
MSMEG_0899	3.77395	4.3177	21.101	21.2939	21.0427	24.5459	25.1116	25.1019			MSMEG_6790
MSMEG_0900	0.998084	1.77284	22.0604	21.7646	21.526	23.0289	22.3854	22.931
MSMEG_0901	-1.09491	3.60932	25.6564	25.8883	25.8362	24.8018	24.6745	24.6199
MSMEG_0903	1.93447	3.09251	25.3342	25.3948	25.8501	27.2285	27.4525	27.7015
MSMEG_0911	1.94178	2.76181	26.3096	26.0415	26.6748	27.914	28.4648	28.4724
MSMEG_0912	1.28369	2.36384	25.2726	24.907	25.5215	26.3979	26.3784	26.7758
MSMEG_0913	-0.00283114	0.0078416	24.984	24.9454	24.8365	24.7295	24.917	25.111
MSMEG_0915	0.671729	1.36122	22.2708	22.1275	22.2754	22.5047	22.8988	23.2855
MSMEG_0918	-1.63462	3.29422	24.0302	24.2388	24.09	22.2231	22.7304	22.5016
MSMEG_0919	-1.6956	3.48303	28.7742	28.8615	28.9748	26.9681	27.4307	27.125
MSMEG_0922	0.0466843	0.194645	23.0539	23.1643	22.8549	23.1022	23.066	23.0449
MSMEG_0930	1.64011	2.14093	22.9394	22.9612	22.9646	24.7246	25.0815	23.9795
MSMEG_0935	1.0976	1.69552	26.8409	27.2864	26.2732	27.8949	27.8706	27.9278
MSMEG_0937	-0.538194	1.01228	22.8081	22.99	22.4021	22.5337	22.127	21.9249
MSMEG_0940	-2.02294	5.35318	25.4973	25.4294	25.6187	23.4551	23.5296	23.4918
MSMEG_0943	0.425079	1.68046	25.5865	25.5103	25.3383	25.8927	25.7559	26.0617
MSMEG_0944	-0.529788	0.517524	22.3365	21.1108	21.414	20.5851	21.4236	21.2632
MSMEG_0948	-0.991968	5.03237	24.4015	24.3611	24.4033	23.3939	23.4539	23.3423
MSMEG_0953	-0.322518	0.644251	23.711	24.2881	23.6378	23.7337	23.4142	23.5216
MSMEG_0954	-1.85101	3.33656	23.9446	23.8123	24.3387	22.1232	22.3333	22.0861
MSMEG_0969	1.87955	3.43283	24.1389	23.8039	24.2771	25.8518	25.8674	26.1393
MSMEG_0983	-0.961011	2.3863	22.9305	22.9778	23.158	22.0128	22.3367	21.8338
MSMEG_0987	-0.576342	1.45216	21.4563	21.3092	21.8205	20.7525	21	21.1044
MSMEG_0989	-0.616716	0.55075	24.5318	23.4826	24.2145	23.1608	24.2259	22.9921
MSMEG_1060	-0.701197	1.19258	24.2322	24.6207	23.6727	23.5256	23.4559	23.4405
MSMEG_1066	-2.293	5.02268	22.6418	22.7269	22.5336	20.235	20.4399	20.3484
MSMEG_1075	1.42974	3.30987	24.1469	23.9938	24.0947	25.3383	25.4217	25.7647
MSMEG_1076	-1.04441	1.89415	25.7068	25.4359	25.6087	24.1518	24.5176	24.9487
MSMEG_1089	0.0525633	0.0692451	23.7231	23.133	23.8217	23.8391	23.6819	23.3145
MSMEG_1090	0.488576	0.950906	25.183	25.4589	24.6738	25.567	25.4877	25.7268
MSMEG_1108	-1.05253	3.52567	23.0436	23.1189	23.1716	22.165	22.1125	21.899
MSMEG_1124	-2.12347	2.70354	23.0285	22.082	22.4455	20.5688	20.4125	20.2043
MSMEG_1133	-0.18642	0.488619	21.3845	21.402	21.7003	21.1798	21.5707	21.1771
MSMEG_1157	-0.0548553	0.217006	20.511	20.582	20.5018	20.4151	20.3519	20.6633
MSMEG_1165	-1.55146	3.9019	28.2106	28.2632	28.1242	26.8191	26.481	26.6435
MSMEG_1182	0.132446	0.550906	22.0011	22.3043	22.0352	22.3377	22.1907	22.2097
MSMEG_1183	1.10076	1.55852	21.5731	21.6624	22.0446	22.6098	22.5312	23.4414
MSMEG_1188	-1.19344	2.2542	23.4219	22.8735	23.1103	21.8749	22.2316	21.7188
MSMEG_1200	-1.48273	2.82977	21.5441	21.6219	22.1325	20.2838	20.199	20.3675
MSMEG_1215	-0.202723	1.06167	21.1207	21.1108	21.1277	20.8425	20.8131	21.0954
MSMEG_1216	-1.30603	1.42642	23.432	22.6894	23.4807	21.5847	21.5245	22.5749
MSMEG_1242	1.4797	3.03524	23.908	24.0301	23.5591	25.2525	25.1919	25.4919
MSMEG_1252	-0.933722	2.23956	22.3949	21.8314	21.9479	21.1705	21.1158	21.0868
MSMEG_1255	-0.281804	1.10363	22.3556	22.3036	22.4731	22.2859	21.908	22.0931
MSMEG_1265	0.82827	2.25278	24.6824	24.7066	24.9645	25.3854	25.6449	25.808
MSMEG_1285	-0.983531	2.56892	25.3458	25.4197	25.0788	24.3681	24.4369	24.0886
MSMEG_1291	0.506706	1.68574	21.6681	21.6257	21.8078	22.0217	22.1551	22.445
MSMEG_1296	2.0594	3.68969	22.7922	22.3254	22.6454	24.7239	24.7283	24.489
MSMEG_1334	-0.21079	0.210546	23.0603	24.2068	23.166	23.2089	23.0775	23.5142
MSMEG_1340	0.248909	0.580191	23.7064	23.3166	23.3422	23.8543	23.8413	23.4162
MSMEG_1341	0.652662	1.17786	23.9834	24.002	23.2336	24.4026	24.4939	24.2804
MSMEG_1342	-0.392506	1.36655	22.754	22.6224	22.9581	22.2084	22.4317	22.5169
MSMEG_1345	-0.707672	2.29616	27.767	27.934	27.5088	27.0652	26.9738	27.0479
MSMEG_1346	-0.943083	2.796	27.7553	27.6969	27.9979	27.0149	26.8779	26.7281
MSMEG_1347	-1.72732	4.4019	29.7373	29.689	29.9333	27.9687	28.0864	28.1225
MSMEG_1349	-0.708417	0.638911	22.4835	22.8083	22.2806	21.5567	21.1518	22.7387
MSMEG_1350	1.44516	1.94613	22.6814	21.6972	21.8478	23.3037	23.5933	23.6649
MSMEG_1356	0.563478	3.1796	22.4184	22.2439	22.2912	22.8608	22.848	22.9352
MSMEG_1364	-1.66149	4.66514	30.5367	30.4857	30.637	28.8002	28.9976	28.8771
MSMEG_1365	-0.17215	0.292079	31.6301	31.8433	31.2021	31.6325	31.3997	31.1268
MSMEG_1367	-1.09075	4.20139	27.7613	27.8044	27.8149	26.6101	26.6826	26.8157
MSMEG_1368	-0.943338	1.92366	26.2826	26.1815	26.4218	24.9996	25.3498	25.7065
MSMEG_1371	0.967557	2.27961	24.2687	24.1338	24.0567	25.0368	24.888	25.437
MSMEG_1374	-0.602982	0.576434	24.6892	24.423	25.1122	23.7789	23.6601	24.9765
MSMEG_1376	-0.512819	0.820997	21.7339	22.2386	22.2661	21.4236	21.2561	22.0203
MSMEG_1383	-0.734062	2.24864	23.7271	23.4496	23.7729	22.8991	22.7682	23.0802
MSMEG_1387	2.72771	2.35142	21.3027	20.9966	21.9964	23.8386	23.7469	24.8933
MSMEG_1393	-0.89484	2.00056	23.7674	23.7354	23.841	22.6278	22.7705	23.261
MSMEG_1399	-0.0460879	0.0609564	26.4559	26.8138	26.8635	26.3312	26.5611	27.1027
MSMEG_1401	-0.175587	0.360995	31.35	31.3565	31.337	31.0558	31.5669	30.8941
MSMEG_1416	-0.994676	4.13068	25.8705	25.9398	26.0481	25.015	24.9403	24.9191
MSMEG_1417	0.019776	0.039447	23.8175	23.8992	23.353	23.7254	23.6937	23.71
MSMEG_1424	0.0566362	0.0644412	22.1155	22.8499	23.0263	22.8513	22.8409	22.4695
MSMEG_1428	0.257476	1.11113	21.9946	21.9944	21.7179	22.229	22.0443	22.206
MSMEG_1430	-1.02323	1.91899	20.5831	20.561	21.1849	19.5353	19.7968	19.9272
MSMEG_1435	-2.1824	3.83567	28.3883	28.1813	28.6992	26.2434	26.1783	26.3
MSMEG_1436	-0.439649	0.792751	25.8812	25.8235	26.0536	25.0895	25.4139	25.936
MSMEG_1437	-0.0116755	0.0585751	26.4009	26.5713	26.5205	26.5799	26.4409	26.4369
MSMEG_1438	-1.45058	1.32873	27.8835	28.2856	28.162	27.5128	25.7917	26.6748
MSMEG_1439	0.314263	0.155081	26.1423	26.3127	26.7103	26.2013	25.7491	28.1576
MSMEG_1440	-0.362384	0.917463	25.6814	25.4699	26.0138	25.1805	25.3949	25.5026
MSMEG_1441	-0.648368	0.683481	26.2208	26.1832	26.386	25.1874	25.1888	26.4687
MSMEG_1442	-0.743164	0.658978	24.3652	24.2204	24.8213	23.1113	23.4	24.6661
MSMEG_1443	-0.445299	1.80801	25.0961	25.1088	25.2648	24.5197	24.8007	24.8134
MSMEG_1444	-2.00465	5.55109	29.2593	29.1286	29.2116	27.2672	27.1578	27.1606
MSMEG_1445	-1.70019	3.89574	27.7178	27.699	27.7664	26.0747	25.8099	26.198
MSMEG_1465	-0.915034	3.13206	25.0447	25.1815	25.1974	24.0677	24.2503	24.3605
MSMEG_1466	-1.52206	2.39173	28.1602	27.9595	28.1014	26.6737	26.0712	26.9101
MSMEG_1467	-0.20255	0.451863	25.5702	25.61	25.8919	25.2786	25.3735	25.8123
MSMEG_1469	-0.304878	0.489514	24.2395	24.5439	24.479	23.7117	24.0488	24.5873
MSMEG_1470	-0.316881	1.29261	27.3109	27.3439	27.4072	26.8146	27.1401	27.1567
MSMEG_1471	-1.43445	3.56911	29.2116	29.1005	29.1352	27.7273	27.5109	27.9058
MSMEG_1472	-1.04698	2.33843	27.5748	27.7607	27.9697	26.7188	26.9698	26.4756
MSMEG_1474	-0.534651	1.11607	27.0273	26.831	27.2028	26.2536	26.3238	26.8797
MSMEG_1475	-0.337976	1.86469	22.0979	22.1589	22.2482	21.8772	21.6973	21.9166
MSMEG_1476	-1.00137	2.09717	24.5753	24.5106	24.5654	23.191	23.5624	23.8938
MSMEG_1480	0.0484009	0.0961058	22.1023	22.3935	21.797	22.1086	22.2503	22.0791
MSMEG_1482	-0.229521	0.557505	23.9153	24.3047	23.8203	23.9387	23.8334	23.5796
MSMEG_1484	-1.71397	3.27243	29.7408	29.7672	29.8982	28.0116	28.399	27.8537
MSMEG_1485	-0.92082	2.57356	23.295	23.4046	23.3896	22.6965	22.3904	22.2398
MSMEG_1496	0.787742	2.44308	22.3364	22.3943	22.7014	23.3668	23.1557	23.2728
MSMEG_1498	2.41441	2.42682	23.1164	23.1895	24.2722	25.7741	25.8325	26.2146
MSMEG_1512	1.1244	2.0148	23.7382	23.6616	24.0918	24.7544	24.7509	25.3595
MSMEG_1513	0.863331	1.54522	25.955	26.2691	25.4578	26.932	26.5767	26.7631
MSMEG_1517	-1.32625	2.85964	25.1145	24.8666	25.277	23.5624	23.9698	23.747
MSMEG_1519	-1.82046	4.4901	26.7666	26.5596	26.7282	24.8378	24.9807	24.7746
MSMEG_1521	-0.633917	1.07722	27.3966	27.5671	27.3674	26.7192	26.3949	27.3153
MSMEG_1523	-0.357598	0.523858	26.3025	26.7596	26.8056	25.8966	26.1475	26.751
MSMEG_1524	0.0463212	0.0901423	28.5097	28.6252	28.204	28.5685	28.6753	28.234
MSMEG_1525	0.84947	2.09691	22.2646	22.6098	22.6181	23.5013	23.4467	23.0928
MSMEG_1528	-2.18592	2.30731	24.5147	24.3424	25.5009	22.4768	22.4343	22.8891
MSMEG_1543	1.70396	2.58176	26.5046	26.4849	26.911	28.7622	28.0762	28.174
MSMEG_1544	0.49216	0.817922	25.5267	25.6303	25.0525	26.2095	25.4854	25.9912
MSMEG_1546	-1.23347	1.40976	24.5264	24.4532	25.0243	24.1407	22.9147	23.2481
MSMEG_1547	2.00702	2.45985	21.9908	21.6264	22.3867	23.9778	23.6108	24.4364
MSMEG_1548	-0.901676	1.30648	21.9396	21.9675	22.7447	21.5345	20.9438	21.4685
MSMEG_1550	-1.96338	1.96108	22.6896	22.2389	23.2971	21.4029	20.4803	20.4523
MSMEG_1554	-0.303944	1.69518	21.0863	21.0964	21.2019	20.7309	20.7749	20.9669
MSMEG_1556	1.24462	1.13698	23.557	24.129	24.0604	24.8795	24.5013	26.0994
MSMEG_1557	-1.38884	2.49125	28.014	28.1317	28.3562	26.8647	26.4044	27.0664
MSMEG_1559	-1.6664	3.27797	23.3429	23.5619	23.7028	21.9618	22.0265	21.62
MSMEG_1573	1.60356	2.07051	20.61	20.5209	21.0946	21.9205	22.2403	22.8754
MSMEG_1574	1.14658	2.50726	26.0593	25.7917	25.786	26.8361	26.9063	27.3343
MSMEG_1577	0.214553	0.367127	21.6526	22.3457	21.6901	21.9343	22.1371	22.2605
MSMEG_1578	-2.267	3.68841	24.4715	24.7667	25.0121	22.6183	22.4857	22.3453
MSMEG_1580	-0.199693	0.333207	21.8648	22.215	21.7023	21.4164	22.0878	21.6787
MSMEG_1582	-0.324661	1.07539	32.4505	32.7728	32.5608	32.4806	32.1831	32.1464
MSMEG_1583	-1.20277	2.955	30.4111	30.4547	30.6739	29.46	29.3945	29.077
MSMEG_1602	-1.08936	2.94713	25.7293	25.7972	26.1282	24.8743	24.7876	24.7247
MSMEG_1603	0.436372	0.581569	26.0715	26.0297	25.2736	26.5185	26.3487	25.8168
MSMEG_1610	0.893867	5.18717	24.9676	25.0341	24.9612	25.852	25.8815	25.9111
MSMEG_1634	-0.941392	4.78067	26.727	26.759	26.831	25.7858	25.8624	25.8446
MSMEG_1635	-0.245461	0.735502	24.4618	24.4785	24.714	24.3554	24.0611	24.5015
MSMEG_1637	-1.76052	2.91553	23.6393	23.6855	24.2567	22.2597	21.9815	22.0587
MSMEG_1639	-0.790472	1.40021	21.3614	21.2739	21.3995	20.0418	20.8913	20.7302
MSMEG_1642	-1.4327	2.52147	23.8462	23.2385	23.9514	22.2223	22.2795	22.2362
MSMEG_1647	0.139407	0.405217	25.7427	25.9314	25.66	25.9908	25.6797	26.0819
MSMEG_1651	-0.196716	0.244437	25.5413	26.0322	24.9946	25.5153	25.3148	25.1479
MSMEG_1652	2.13219	3.26049	26.4007	26.523	26.1774	28.6343	28.7323	28.1311
MSMEG_1654	1.77543	3.15449	27.6055	27.4393	27.7745	29.1625	29.287	29.696
MSMEG_1657	-0.0950089	0.225907	24.2971	24.5194	24.4052	24.4357	24.011	24.49
MSMEG_1661	-1.28209	2.85935	22.5191	22.7544	22.5556	21.5987	21.1046	21.2796
MSMEG_1662	1.70972	2.91649	25.4653	25.258	25.7769	27.0716	27.0592	27.4986
MSMEG_1665	1.15784	3.06426	25.3568	25.3712	24.9796	26.4147	26.4075	26.359
MSMEG_1669	1.30337	2.87113	25.0461	24.9357	24.7492	26.002	26.1642	26.475
MSMEG_1670	1.92031	2.73039	25.8901	25.6683	26.2897	27.5168	27.9264	28.1659
MSMEG_1673	-0.436348	2.04535	22.7995	22.815	22.9403	22.5676	22.2942	22.3841
MSMEG_1675	0.128232	0.40656	22.8937	23.0374	22.6755	23.1615	22.9304	22.8995
MSMEG_1676	1.62296	2.87175	23.1911	23.19	23.4482	24.8842	24.5874	25.2266
MSMEG_1679	0.200179	1.14697	25.5481	25.7093	25.471	25.7232	25.7453	25.8605
MSMEG_1680	1.12984	2.19402	27.4176	27.5343	26.8912	28.3581	28.5812	28.2933
MSMEG_1681	0.969762	2.2737	27.6855	27.4344	27.7258	28.3227	28.5868	28.8454
MSMEG_1682	1.53616	2.04105	24.6906	24.6202	25.5282	26.1981	26.603	26.6464
MSMEG_1684	0.67347	2.90671	26.5259	26.5039	26.2704	27.0875	27.102	27.1311
MSMEG_1694	-0.834392	1.76285	26.1735	26.1387	25.7732	25.1536	25.5069	24.9218
MSMEG_1701	0.395816	1.75224	24.5372	24.7442	24.4382	24.9806	25.0444	24.882
MSMEG_1703	0.49686	1.22192	22.7051	22.9953	23.3502	23.457	23.4902	23.5939
MSMEG_1712	-1.47528	2.3961	23.6623	23.3418	23.2111	21.9612	21.5533	22.2748
MSMEG_1735	1.90702	3.38432	24.7915	24.9779	24.5941	26.5797	26.5373	26.9675
MSMEG_1736	-1.90443	2.99722	21.4957	20.8384	21.4469	19.2563	19.4812	19.3302
MSMEG_1762	1.11914	3.48902	22.6297	22.5821	22.5919	23.7057	23.5619	23.8937
MSMEG_1770	-1.28423	3.23007	26.2773	26.3729	26.6333	25.127	25.2805	25.0233
MSMEG_1782	0.395867	0.769261	22.0529	22.1686	21.9763	22.6926	22.0012	22.6916
MSMEG_1804	-1.52668	4.24965	25.4566	25.5487	25.5551	24.0532	23.8374	24.0897
MSMEG_1805	-1.98389	4.66452	23.7803	23.7011	23.9562	21.9049	21.8245	21.7565
MSMEG_1807	1.31077	3.77802	28.9891	29.0253	29.2786	30.4501	30.3493	30.4259
MSMEG_1809	1.69856	3.34187	25.5234	25.3853	25.1409	26.918	26.9483	27.2791
MSMEG_1812	1.43355	1.54018	23.0904	23.6414	23.2118	25.1346	25.1521	23.9576
MSMEG_1813	2.43994	3.4817	26.5958	26.5659	27.1461	29.0128	29.296	29.3187
MSMEG_1819	1.99631	2.99099	24.1717	23.9938	24.7039	26.1662	26.2206	26.4715
MSMEG_1820	0.283721	0.334903	23.4116	23.9425	22.7724	23.835	23.5666	23.576
MSMEG_1821	-0.125205	0.360493	24.7711	25.0657	24.7774	24.8801	24.8246	24.5339
MSMEG_1822	-0.654397	1.836	23.7043	24.1648	23.8012	23.3836	23.1781	23.1454
MSMEG_1825	-1.40108	2.06342	24.8903	25.3787	25.607	24.0464	24.1345	23.4918
MSMEG_1830	-0.319644	0.409083	20.9163	21.1039	21.6407	21.4001	20.693	20.6088
MSMEG_1831	-1.68198	4.06277	23.7052	23.6338	23.6137	22.1586	21.8162	21.932
MSMEG_1834	0.0999438	0.341148	21.2173	21.4211	21.4818	21.4042	21.6538	21.3621
MSMEG_1836	-0.0420806	0.0544998	23.7609	23.7198	23.8237	24.1871	23.7203	23.2708
MSMEG_1868	-1.2428	4.26503	22.7441	22.7916	22.741	21.3989	21.6293	21.5202
MSMEG_1874	0.185256	0.444235	22.4937	22.937	22.4165	22.742	22.7088	22.9521
MSMEG_1881	-1.06857	4.09884	26.0885	26.1729	26.1868	24.9732	25.168	25.1013
MSMEG_1884	-1.41638	3.69153	25.3323	25.6624	25.3968	23.9986	24.014	24.1297
MSMEG_1887	-2.22029	2.77484	24.6832	24.586	25.1509	22.975	22.6319	22.1523
MSMEG_1888	-0.684069	3.00853	22.3331	22.3175	22.4545	21.7615	21.7387	21.5527
MSMEG_1890	-0.152321	0.522111	25.4946	25.7193	25.281	25.3853	25.316	25.3366
MSMEG_1891	-1.17397	1.88845	23.5277	23.1096	23.3727	21.9516	21.8829	22.6535
MSMEG_1914	-0.869906	3.30335	26.2676	26.3088	26.204	25.2723	25.3591	25.5392
MSMEG_1917	0.223782	0.602019	22.0764	22.2345	22.0471	22.6509	22.2329	22.1456
MSMEG_1922	1.8027	2.69807	22.3277	21.6828	21.8001	24.0487	23.5826	23.5875
MSMEG_1932	-0.624379	1.60113	21.5566	21.4812	21.6607	21.0874	21.137	20.601
MSMEG_1934	-1.01001	3.00738	28.7362	28.6813	28.9755	27.8134	27.901	27.6485
MSMEG_1936	-2.01771	3.04584	24.9547	24.6059	25.3581	23.0806	22.8436	22.9414
MSMEG_1945	-1.46043	2.16347	23.5902	23.6579	22.776	21.8631	21.8397	21.94
MSMEG_1946	0.965636	2.09286	23.0638	22.7672	23.2338	23.7591	24.2495	23.953
MSMEG_1947	-1.62277	3.08798	27.7267	27.7591	28.2413	26.2395	26.2039	26.4154
MSMEG_1950	-1.03381	2.76394	28.0018	28.0718	28.2837	27.1829	27.2064	26.8666
MSMEG_1951	-1.31753	3.64737	26.7273	26.7446	26.7667	25.4196	25.6124	25.254
MSMEG_1954	-1.32918	2.52014	22.5713	22.6495	22.9097	21.0415	21.6537	21.4477
MSMEG_1957	-0.888795	3.73376	24.8732	24.754	24.9133	23.8873	24.0461	23.9408
MSMEG_1959	-1.18933	3.77086	24.1031	24.1594	24.3683	23.0768	23.0261	22.9598
MSMEG_1977	0.605066	0.514133	24.7815	24.3754	23.3629	25.2285	24.89	24.2165
MSMEG_1979	0.975255	0.750465	21.9086	20.4006	20.1816	21.7384	22.265	21.4131
MSMEG_1986	0.441279	1.06781	21.3745	21.1208	20.8915	21.3096	21.6383	21.7627
MSMEG_1996	1.78942	2.16329	21.8807	21.5897	21.7773	23.0758	23.3418	24.1984
MSMEG_2007	-0.206414	1.12909	23.0827	23.3131	23.0484	22.9857	22.9192	22.9202
MSMEG_2010	1.50403	1.20146	23.2183	23.5757	24.543	25.7079	25.7289	24.4122
MSMEG_2026	-1.09503	3.03049	25.3508	25.4415	25.4795	24.5635	24.2453	24.1779
MSMEG_2027	-0.95948	2.15844	25.3628	25.4775	25.5317	24.5685	24.1548	24.7702
MSMEG_2033	0.987829	1.33365	24.8443	25.2094	24.0907	25.508	25.7193	25.8805
MSMEG_2045	-0.501871	1.05262	21.319	21.7625	21.9061	21.2252	21.3602	20.8965
MSMEG_2064	-1.9949	4.0402	25.6211	25.7183	25.7872	23.9137	23.7153	23.5128
MSMEG_2067	-0.621841	0.930958	22.5601	22.8484	21.8196	21.8766	21.6732	21.8128
MSMEG_2068	-1.36367	1.90285	22.1937	22.5452	23.2045	21.179	21.1688	21.5046
MSMEG_2072	1.36707	2.36616	21.7874	22.0573	21.6943	23.6251	23.0531	22.9619
MSMEG_2073	1.43342	4.58949	21.1825	21.2025	21.3397	22.6645	22.6064	22.754
MSMEG_2074	1.22582	2.74316	22.0909	21.9611	21.9863	23.0607	23.561	23.094
MSMEG_2078	1.05118	2.76267	26.0921	26.1438	25.8575	27.1431	26.8688	27.2352
MSMEG_2079	0.192328	0.465179	24.8911	25.1934	24.7855	25.2854	24.8881	25.2735
MSMEG_2080	-0.760473	2.37205	24.502	24.4902	24.3429	23.8352	23.7697	23.4488
MSMEG_2081	-0.807961	3.51365	24.6405	24.5437	24.5176	23.8694	23.7367	23.6718
MSMEG_2083	-0.635	1.94895	22.5197	22.8306	22.4635	22.0083	22.0947	21.8058
MSMEG_2086	0.718222	1.47521	25.337	25.5707	25.021	26.2592	26.1033	25.7208
MSMEG_2092	-0.966049	2.46351	26.2175	25.9309	25.9018	25.2836	24.893	24.9755
MSMEG_2111	-2.50985	4.0221	26.9748	26.8724	27.3855	24.5233	24.5581	24.6217
MSMEG_2112	0.135133	0.306151	22.1591	22.3057	21.7916	22.2868	22.341	22.034
MSMEG_2115	-0.333338	0.650502	22.5797	23.0486	22.8364	22.8456	22.4101	22.2089
MSMEG_2117	-0.708591	2.1339	25.6085	25.8366	25.5098	24.9082	24.7855	25.1353
MSMEG_2118	1.38312	3.5367	22.9797	23.0384	22.8317	24.2254	24.2426	24.5313
MSMEG_2119	0.245954	0.805761	23.1721	23.435	23.1035	23.6723	23.3408	23.4354
MSMEG_2122	-1.4792	2.04841	23.6869	24.1651	24.4041	22.2209	23.0127	22.5849
MSMEG_2123	3.11205	3.99388	21.7988	21.9578	21.9234	24.6498	25.0443	25.3221
MSMEG_2136	0.632875	2.18093	25.0172	25.0514	24.8208	25.7065	25.399	25.6826
MSMEG_2163	0.673457	0.742858	21.6356	21.5656	21.1594	21.6035	21.8912	22.8862
MSMEG_2174	-1.68104	3.04871	22.3398	22.268	22.3634	20.9623	20.6525	20.3133
MSMEG_2189	1.54137	2.93545	22.3985	22.3865	21.9929	23.7699	23.5925	24.0395
MSMEG_2197	-0.94315	2.45272	21.6456	21.8956	21.8883	21.1171	20.7969	20.686
MSMEG_2201	1.54627	3.15656	23.3477	23.0187	22.957	24.8086	24.442	24.7116
MSMEG_2205	1.29705	4.03085	22.0132	22.1614	22.0203	23.4848	23.3437	23.2575
MSMEG_2206	-0.0792516	0.135385	22.5026	22.5949	22.3867	22.7485	22.035	22.4629
MSMEG_2207	2.23349	3.41264	20.4116	21.0142	20.7149	22.7416	23.018	23.0815
MSMEG_2249	1.21891	3.78551	21.5863	21.5106	21.3927	22.6915	22.8447	22.6101
MSMEG_2261	-0.770367	1.88535	23.3454	23.3266	23.1513	22.3491	22.3199	22.8433
MSMEG_2262	1.05056	1.19822	20.6281	20.6	20.7641	21.1021	21.5515	22.4904
MSMEG_2263	0.942057	1.11882	22.885	22.426	23.0733	23.3369	23.4473	24.4262
MSMEG_2268	-0.458618	2.19331	20.4703	20.2958	20.4852	19.8356	19.9936	20.0463
MSMEG_2271	-0.438209	2.0416	22.9173	22.6844	22.6834	22.301	22.4195	22.25
MSMEG_2274	-0.84125	2.56939	26.3334	26.3477	26.0191	25.3413	25.3082	25.5269
MSMEG_2276	-1.08964	2.65511	23.8501	23.9565	24.3007	23.0434	23	22.795
MSMEG_2350	-0.921959	2.02293	21.1223	21.1489	21.2116	20.2954	20.5458	19.8758
MSMEG_2351	-0.289281	0.701725	30.694	30.9147	30.3754	30.5224	30.4218	30.172
MSMEG_2352	-0.319344	0.779893	30.8355	30.9792	30.471	30.6029	30.5003	30.2245
MSMEG_2353	-0.450892	2.29825	23.9802	23.9819	23.8103	23.5729	23.4721	23.3748
MSMEG_2357	0.938924	1.55855	21.5058	21.2675	21.3034	22.1646	22.8126	21.9162
MSMEG_2360	0.138923	1.65801	22.1489	22.0898	22.1895	22.249	22.2654	22.3306
MSMEG_2362	-0.339319	1.34169	23.8254	23.9653	23.7671	23.7185	23.4151	23.4063
MSMEG_2364	-0.484714	1.20072	23.3684	23.1471	22.818	22.7601	22.4258	22.6934
MSMEG_2365	-0.66651	1.82233	26.5757	26.7647	26.4807	26.0936	25.6604	26.0676
MSMEG_2367	0.0734717	0.320343	26.5322	26.5686	26.3454	26.6299	26.4287	26.6079
MSMEG_2369	-0.420491	0.814306	21.8651	21.6969	22.2492	21.8271	21.4989	21.2238
MSMEG_2372	-1.23681	4.66429	24.8595	24.8658	25.0083	23.6961	23.7	23.627
MSMEG_2373	-0.915531	3.71095	24.5871	24.5257	24.4932	23.648	23.4974	23.714
MSMEG_2374	-0.260447	1.07278	25.9501	25.9866	26.2663	25.7098	25.901	25.8108
MSMEG_2375	0.821785	0.959162	21.7094	21.7039	21.7435	23.0415	21.7479	22.8327
MSMEG_2376	1.8212	2.80768	22.3389	22.0473	22.5443	24.3608	24.2765	23.7568
MSMEG_2378	-0.838141	3.21243	25.4859	25.6161	25.6041	24.5868	24.8394	24.7655
MSMEG_2379	1.567	3.79844	24.1933	24.4121	24.151	25.703	25.7832	25.9711
MSMEG_2381	-1.21235	2.10444	25.5921	25.643	26.3073	24.7337	24.4644	24.7073
MSMEG_2382	-0.388168	0.737568	24.7381	25.2833	24.7055	24.8027	24.2811	24.4786
MSMEG_2383	-0.255639	1.07039	24.1605	24.2087	24.4432	23.9793	23.9149	24.1513
MSMEG_2387	0.990223	3.46207	25.2107	25.3917	25.1371	26.3235	26.1846	26.2021
MSMEG_2388	1.068	3.92357	24.6755	24.5165	24.6221	25.6458	25.5946	25.7778
MSMEG_2389	-1.38532	3.24735	28.065	27.9778	28.3799	26.6238	26.8164	26.8265
MSMEG_2391	0.288596	1.7766	23.3116	23.1588	23.3279	23.636	23.5621	23.466
MSMEG_2393	0.836369	1.72847	21.9753	22.0257	22.0031	22.4854	22.7912	23.2367
MSMEG_2394	1.65952	2.91733	22.5196	22.5643	22.7948	24.0926	24.1116	24.6531
MSMEG_2395	0.348373	0.543341	21.2862	22.1406	21.8553	22.2678	21.8488	22.2106
MSMEG_2397	-0.549791	1.3731	24.0712	24.3761	23.7388	23.4504	23.5236	23.5628
MSMEG_2399	0.140309	0.340072	22.8564	23.1345	22.9435	23.3494	23.1676	22.8384
MSMEG_2407	-0.270229	2.31777	26.8231	26.7802	26.6861	26.5433	26.4726	26.4628
MSMEG_2408	-0.192549	0.589118	26.4943	26.7709	26.336	26.3684	26.4498	26.2055
MSMEG_2410	-1.07025	3.61775	25.5434	25.6652	25.7203	24.5721	24.6916	24.4544
MSMEG_2412	1.22657	1.71646	25.7008	25.4349	25.8107	26.3194	26.9423	27.3643
MSMEG_2414	0.873053	1.51972	24.3719	24.7438	23.8455	25.2639	25.2199	25.0965
MSMEG_2415	-0.975906	1.86667	25.8356	25.6301	25.1376	24.4	24.755	24.5205
MSMEG_2416	-0.399469	1.63336	24.7001	24.5788	24.3744	24.1197	24.2655	24.0696
MSMEG_2418	0.314781	1.16019	23.3757	23.1428	23.5833	23.6635	23.6861	23.6965
MSMEG_2421	-0.420057	0.839367	25.8002	26.4438	25.7367	25.6704	25.5668	25.4834
MSMEG_2426	1.34174	1.57771	24.8531	25.3436	24.0349	26.1711	25.9186	26.1671
MSMEG_2430	-1.38145	3.59085	23.8274	24.0317	23.9935	22.5536	22.7394	22.4152
MSMEG_2434	1.19869	1.21925	21.1954	21.3975	21.3894	23.4395	22.0331	22.1058
MSMEG_2435	-1.10188	3.0359	27.7229	27.688	27.7728	26.548	26.4633	26.8667
MSMEG_2436	-0.66977	0.931669	26.5526	26.7521	27.5767	26.3506	26.4641	26.0573
MSMEG_2437	-1.20654	2.8749	24.0318	24.3619	23.9064	22.9876	22.7659	22.9271
MSMEG_2440	-1.09801	5.52498	25.9326	25.8672	25.9124	24.7628	24.822	24.8334
MSMEG_2441	-1.00992	1.97429	22.2108	22.0942	22.7396	21.3744	21.1467	21.4937
MSMEG_2446	-1.03454	2.80233	21.2698	21.3636	21.2937	20.5064	20.2695	20.0477
MSMEG_2449	2.13488	4.31415	23.8539	23.562	23.8327	25.7875	25.8571	26.0085
MSMEG_2450	1.74947	3.28662	24.889	24.615	24.9983	26.4645	26.4473	26.8388
MSMEG_2451	1.5498	3.55287	23.022	22.8359	23.0608	24.3506	24.4916	24.7258
MSMEG_2458	-0.526872	2.94501	23.1749	23.005	23.0322	22.4891	22.5335	22.609
MSMEG_2468	0.957012	2.62674	22.8945	22.6438	22.734	23.625	23.5688	23.9495
MSMEG_2497	0.238977	0.495401	22.6715	23.0813	22.3576	22.9622	22.9625	22.9028
MSMEG_2511	2.90437	3.17412	21.7294	22.6755	22.1837	25.3669	24.9637	24.9713
MSMEG_2519	-1.02598	2.13927	27.7654	27.8238	28.1769	26.6645	26.8266	27.197
MSMEG_2520	-0.589787	2.13724	30.2151	30.2742	30.0026	29.7341	29.5336	29.455
MSMEG_2528	-0.992147	3.82399	24.7871	24.9193	24.8506	23.9087	23.9301	23.7417
MSMEG_2529	1.15213	3.7952	22.5638	22.687	22.461	23.6684	23.8269	23.6729
MSMEG_2539	-1.02658	2.89494	23.57	23.9638	23.638	22.6828	22.642	22.7673
MSMEG_2540	-0.597906	1.43821	24.5365	24.4533	24.8338	23.7097	24.2268	24.0935
MSMEG_2541	-1.20036	2.7919	29.3684	29.3982	29.2695	28.4465	28.0422	27.9464
MSMEG_2578	-1.77444	4.91974	24.1327	24.1819	24.1541	22.4628	22.2524	22.4302
MSMEG_2580	-1.53616	2.72678	23.8106	23.8304	24.3634	22.6742	22.4045	22.3172
MSMEG_2587	0.835325	0.920337	22.4239	23.0231	23.4382	24.1373	24.0656	23.1883
MSMEG_2593	-1.39568	3.48396	21.7543	21.7381	21.8414	20.413	20.5681	20.1656
MSMEG_2597	0.647652	0.773533	23.1868	23.6001	22.3395	23.8842	23.5215	23.6638
MSMEG_2598	0.0845375	0.145808	22.1359	22.5668	22.4487	22.4341	22.7835	22.1875
MSMEG_2602	0.175002	0.325188	21.3429	21.0932	20.9254	21.6591	21.1714	21.056
MSMEG_2611	1.41314	3.48576	23.3693	23.3318	23.5138	24.6878	24.7304	25.0361
MSMEG_2613	-0.551002	2.01454	23.0317	23.1205	23.2565	22.4308	22.5555	22.7694
MSMEG_2614	1.19034	3.29295	20.6024	20.5733	20.6789	21.6671	21.7295	22.029
MSMEG_2621	0.511388	1.40769	24.7397	24.6676	24.7321	25.1136	25.0058	25.5541
MSMEG_2622	-1.06451	2.46747	24.628	24.5169	24.2683	23.6322	23.4196	23.1678
MSMEG_2623	-1.18141	4.43313	22.0718	22.0843	22.2465	20.9614	20.9787	20.9183
MSMEG_2624	-1.35271	4.22983	26.2043	26.4128	26.3082	25.0254	24.8672	24.9746
MSMEG_2625	-1.07729	3.09864	22.6202	22.7936	22.5971	21.5747	21.4292	21.7752
MSMEG_2628	-1.21993	3.93555	25.8452	25.7723	25.8081	24.4446	24.7157	24.6056
MSMEG_2629	-2.20322	4.52636	26.0001	25.909	26.0175	23.6539	23.9685	23.6946
MSMEG_2634	-0.725164	1.50989	21.8023	21.2713	21.7398	21.133	20.8768	20.6282
MSMEG_2641	1.04802	2.29737	24.8193	25.0636	24.4644	25.8449	25.7019	25.9447
MSMEG_2654	-0.16931	0.453091	26.6206	26.9609	26.9888	26.5236	26.6446	26.8942
MSMEG_2656	1.50111	2.98072	27.8191	27.7444	27.7792	29.4969	28.9352	29.4139
MSMEG_2658	-0.348441	0.949349	27.016	27.3364	26.8899	26.9072	26.5327	26.757
MSMEG_2664	2.75515	2.7554	22.8032	22.7679	21.9557	25.0609	24.9754	25.7558
MSMEG_2669	0.17239	0.257681	25.7093	25.9629	25.1696	26.0216	25.7513	25.5861
MSMEG_2684	0.328961	1.23502	24.8317	25.0777	24.7043	25.0844	25.2286	25.2875
MSMEG_2685	1.40465	1.72568	23.9062	23.6715	23.9542	24.8631	24.9202	25.9626
MSMEG_2688	-0.962554	2.15621	25.0752	25.3508	25.4845	24.5966	24.0937	24.3326
MSMEG_2695	-1.48506	3.9165	28.7066	28.7011	28.951	27.4073	27.2111	27.2852
MSMEG_2700	-1.26324	1.84873	24.7808	24.9403	24.1308	23.5861	23.4675	23.0086
MSMEG_2723	0.645442	2.58892	24.1402	23.8937	24.2078	24.7071	24.7498	24.7211
MSMEG_2727	-0.479052	2.79952	27.983	27.9285	27.8772	27.3867	27.4051	27.5598
MSMEG_2728	-0.645311	1.83479	22.1574	22.0619	22.3603	21.3822	21.4581	21.8035
MSMEG_2731	-2.02828	4.73763	27.2628	27.1216	27.3097	25.3192	25.1006	25.1894
MSMEG_2739	-1.6485	3.83328	25.6844	25.6039	25.9436	24.1165	24.1806	23.9892
MSMEG_2740	-1.80248	3.51554	24.4048	24.3746	24.7958	22.6385	22.868	22.6613
MSMEG_2744	0.107381	0.0881499	24.8748	25.3314	23.8798	24.9149	24.7043	24.7889
MSMEG_2746	-0.680925	2.18708	23.9501	23.9937	24.0842	23.25	23.5728	23.1625
MSMEG_2750	-1.26384	3.51106	27.2752	27.0299	27.2189	25.7972	26.0625	25.8728
MSMEG_2752	-0.733678	2.82923	23.3974	23.3206	23.2469	22.7486	22.5494	22.4658
MSMEG_2754	-0.895163	0.792151	23.5724	24.1374	23.8422	23.2561	23.6232	21.9872
MSMEG_2756	-0.967353	3.04418	24.765	24.6523	24.5126	23.6648	23.8223	23.5407
MSMEG_2758	-1.3546	5.28368	26.9043	26.846	26.9547	25.4991	25.5924	25.5497
MSMEG_2760	-0.0872822	0.200836	24.2191	24.1102	24.3998	24.4015	23.9009	24.1649
MSMEG_2762	-0.777978	0.897338	22.4828	21.7943	22.5678	21.428	22.0949	20.9882
MSMEG_2763	-1.237	1.97679	25.6292	25.4518	25.7248	24.7753	24.4389	23.8807
MSMEG_2765	-1.56232	3.02818	26.2034	26.3394	26.5819	24.934	24.5336	24.9702
MSMEG_2766	-2.11316	4.12096	26.2223	26.0795	26.5012	24.1105	24.2028	24.1501
MSMEG_2769	0.75445	2.21444	23.106	22.8963	23.1589	23.581	23.9754	23.8682
MSMEG_2771	1.47405	3.28276	22.6866	22.5114	22.6894	23.918	24.0327	24.3588
MSMEG_2773	1.68375	1.04643	19.246	19.4306	19.7338	21.6543	19.693	22.1143
MSMEG_2780	0.0132109	0.0151451	22.3855	22.0585	22.9933	22.3522	22.4585	22.6661
MSMEG_2782	-0.326111	0.876591	23.7396	23.7291	24.0469	23.3261	23.4284	23.7828
MSMEG_2784	-1.13106	2.85395	28.4836	28.274	28.0817	27.2708	26.9869	27.1885
MSMEG_2786	-0.768037	2.27193	22.741	22.5972	22.87	21.847	22.1989	21.8583
MSMEG_2820	-0.790393	2.51687	22.5257	22.4713	22.7722	21.7542	21.6864	21.9574
MSMEG_2839	-1.17763	4.53337	26.7565	26.7127	26.8447	25.5831	25.5307	25.6671
MSMEG_2850	-1.72385	4.57648	24.944	25.0031	24.9107	23.3742	23.1276	23.1844
MSMEG_2868	-0.71653	1.22102	20.1655	21.0496	20.2955	19.7888	19.7979	19.7742
MSMEG_2900	1.84177	2.89231	22.2741	21.8333	22.4958	23.8046	24.1628	24.1611
MSMEG_2931	-1.26016	2.57302	25.1096	25.062	25.3329	23.9334	23.6008	24.1898
MSMEG_2937	0.66393	1.01708	26.2274	26.4756	25.5306	26.975	26.6544	26.5959
MSMEG_2940	-1.69986	3.31032	26.4096	26.1219	26.4642	24.8341	24.6586	24.4034
MSMEG_2941	-0.807576	2.21858	26.4222	26.666	26.167	25.7067	25.5483	25.5775
MSMEG_2942	2.07883	4.43512	21.9069	22.0297	21.6851	23.9815	23.9036	23.9732
MSMEG_2953	0.0523554	0.226091	24.5663	24.4058	24.4608	24.5031	24.6754	24.4115
MSMEG_2959	1.25167	2.39583	22.5219	22.3985	22.8048	23.6849	23.6246	24.1707
MSMEG_2963	-1.07365	2.63172	21.6966	21.4142	21.4738	20.3997	20.2616	20.7024
MSMEG_2964	-1.57722	1.96264	22.1771	22.8503	23.1445	21.0087	21.5471	20.8843
MSMEG_2974	-0.962221	2.32038	26.9229	26.6309	27.1642	26.084	25.8942	25.8531
MSMEG_2976	-1.52715	3.90269	24.5905	24.4386	24.7261	23.1487	23.0872	22.9379
MSMEG_2982	-0.106974	0.168087	22.771	22.6521	22.085	22.3226	22.2462	22.6183
MSMEG_2983	-1.57679	2.18452	25.7707	25.513	26.5105	24.264	24.4458	24.3541
MSMEG_2999	1.20674	1.43618	21.1228	21.0461	21.123	21.7552	22.0988	23.0582
MSMEG_3000	-1.43972	3.05586	24.9805	25.1916	25.3647	23.6467	23.9725	23.5984
MSMEG_3003	-1.03307	2.33634	23.2232	23.7347	23.7847	22.5416	22.5843	22.5175
MSMEG_3004	-2.12603	4.07649	27.2264	27.2375	27.6059	25.2961	25.1595	25.2361
MSMEG_3019	1.06519	2.06008	22.3719	22.4483	22.4917	23.0661	23.6783	23.7631
MSMEG_3025	-1.48612	4.06166	26.4122	26.3775	26.6312	24.9305	24.9514	25.0806
MSMEG_3027	-0.507885	2.217	20.8892	21.0597	21.1275	20.4404	20.6454	20.4669
MSMEG_3030	-0.156877	0.370597	24.1544	24.1595	24.2662	24.3295	23.7293	24.0507
MSMEG_3034	-0.0413984	0.0853748	23.7762	23.9071	23.7596	23.7567	24.0672	23.4947
MSMEG_3035	0.882063	0.525088	24.1923	25.4264	24.0022	26.5888	24.9776	24.7007
MSMEG_3036	-0.297462	0.691023	24.5484	24.5533	24.0262	24.0498	23.9416	24.2441
MSMEG_3041	-0.350092	1.30205	23.5254	23.6851	23.3222	23.2973	23.1168	23.0683
MSMEG_3044	-0.0302149	0.109522	24.682	24.8256	24.539	24.7537	24.6407	24.5615
MSMEG_3046	-1.14701	3.11198	22.7029	22.6751	22.9903	21.6158	21.7805	21.531
MSMEG_3047	-1.07338	2.45409	26.5715	26.3079	26.1218	25.1846	25.1095	25.4869
MSMEG_3048	-1.29179	1.83322	22.24	21.2515	21.9295	20.6172	20.6444	20.2841
MSMEG_3050	-1.36527	2.83982	30.4223	30.5248	30.7815	28.9347	29.34	29.358
MSMEG_3051	-0.378229	1.22577	21.5458	21.688	21.2888	21.1903	20.9599	21.2378
MSMEG_3053	-1.18001	2.61591	24.8832	25.0945	25.26	23.9361	24.1116	23.6501
MSMEG_3055	1.49172	2.36032	28.3697	28.7655	27.893	29.9173	29.7526	29.8336
MSMEG_3058	-0.837961	2.65804	26.6917	26.373	26.3238	25.6741	25.6369	25.5635
MSMEG_3059	-0.164155	0.241249	25.1485	25.2211	24.8058	25.1079	25.1517	24.4234
MSMEG_3064	-1.25987	2.24404	22.6489	22.42	22.8337	21.4088	21.7029	21.0113
MSMEG_3066	1.56123	1.51526	22.6398	24.246	23.1987	25.0275	24.7865	24.9542
MSMEG_3070	-0.156222	0.400222	23.701	23.4111	23.1432	23.1901	23.286	23.3105
MSMEG_3071	0.154318	0.159469	22.6411	23.0088	21.8845	22.8243	22.3675	22.8056
MSMEG_3072	0.0828819	0.282999	24.0014	24.0675	24.2224	24.3736	24.1113	24.0551
MSMEG_3073	-0.90632	2.85844	25.6631	25.5411	25.5331	24.6276	24.8759	24.5148
MSMEG_3081	-1.10272	3.1175	22.4948	22.577	22.8509	21.4696	21.6392	21.5058
MSMEG_3084	0.209915	0.368002	30.9116	31.2512	30.4899	31.0088	30.9963	31.2774
MSMEG_3085	0.707369	2.06183	28.2311	28.2026	27.8187	28.7137	28.7428	28.918
MSMEG_3086	1.8194	3.41584	25.5787	25.2081	25.0884	26.9993	27.0843	27.2499
MSMEG_3094	1.16282	1.77243	21.488	21.5127	21.5616	22.4835	22.3049	23.2624
MSMEG_3095	-0.925648	2.45173	25.1273	24.8793	25.1345	24.0808	23.9284	24.3549
MSMEG_3099	-0.556967	1.77875	26.8919	27.0709	26.9266	26.6439	26.1985	26.3761
MSMEG_3100	0.643583	1.52387	25.3263	25.4382	24.9369	25.9345	25.6429	26.0547
MSMEG_3101	1.69582	2.15501	24.8783	24.6467	25.2579	26.2484	26.4485	27.1735
MSMEG_3103	1.77261	3.74898	28.3328	28.0164	28.1811	29.815	29.8994	30.1338
MSMEG_3106	0.488997	1.80802	27.165	27.2345	26.8994	27.64	27.666	27.4599
MSMEG_3108	-1.21364	3.18418	20.1047	20.2229	20.3819	18.9055	19.2162	18.947
MSMEG_3111	-0.617154	1.93378	23.3965	23.4573	23.7135	22.7089	22.9626	23.0443
MSMEG_3112	-0.298471	0.221359	22.151	22.9588	22.8348	22.4435	23.099	21.5067
MSMEG_3122	-1.21712	3.62897	25.1307	25.3145	25.2333	23.9908	24.1584	23.8779
MSMEG_3123	-1.13711	4.02401	24.5916	24.4296	24.3986	23.3376	23.4052	23.2657
MSMEG_3124	-0.1331	0.621104	24.1553	24.0927	24.3479	24.0706	24.1637	23.9623
MSMEG_3125	1.1099	3.18469	24.3136	24.3659	24.3669	25.421	25.2827	25.6724
MSMEG_3126	-0.918634	0.942005	22.4872	22.2356	22.7291	21.9343	22.06	20.7018
MSMEG_3127	0.189842	0.316625	25.097	24.9779	24.5022	25.1703	25.2538	24.7224
MSMEG_3138	-1.53636	3.8316	26.8949	27.0362	26.8393	25.4862	25.4718	25.2034
MSMEG_3143	1.43057	3.13835	29.0695	29.0911	28.772	30.2841	30.3064	30.6339
MSMEG_3147	-0.705395	2.23756	25.6131	25.5002	25.9167	24.9158	25.0532	24.9448
MSMEG_3150	-1.43713	3.43323	25.9265	25.8654	26.2675	24.5224	24.6265	24.5991
MSMEG_3151	-0.194719	0.77188	22.0647	22.1874	22.2288	21.8541	22.1759	21.8668
MSMEG_3152	0.922295	1.6343	22.6513	22.9504	22.5926	23.1928	23.8279	23.9405
MSMEG_3155	-1.36285	2.70814	23.4827	23.0969	23.6901	21.9301	22.0645	22.1866
MSMEG_3158	0.49799	1.9101	26.5735	26.2009	26.4929	26.9209	26.9542	26.8861
MSMEG_3159	0.830215	4.13932	25.9913	25.8996	25.976	26.711	26.8489	26.7977
MSMEG_3169	1.41745	1.92	24.0346	23.8655	23.9761	24.8574	25.3081	25.9631
MSMEG_3183	-1.8024	3.84792	22.5497	22.763	22.9579	21.0039	20.8614	20.998
MSMEG_3186	1.39924	1.60222	21.9516	22.1248	22.0804	22.8047	23.3765	24.1733
MSMEG_3188	0.83252	1.71242	21.1254	20.8511	21.0431	21.443	21.9485	22.1257
MSMEG_3199	-1.42906	3.62529	24.8675	24.9653	24.834	23.3041	23.6661	23.4094
MSMEG_3201	0.418472	0.593943	23.0088	23.1502	23.8873	23.5112	23.734	24.0564
MSMEG_3205	1.34079	3.2548	23.2828	23.2148	22.9376	24.377	24.6466	24.434
MSMEG_3206	1.39864	4.59942	22.8967	22.7909	22.8187	24.3197	24.2512	24.1313
MSMEG_3209	-1.7399	5.43484	26.5702	26.6529	26.6657	24.9353	24.9207	24.8133
MSMEG_3211	-0.534098	0.802989	22.407	22.3568	22.4927	21.2755	22.1647	22.2139
MSMEG_3212	-1.16442	2.02896	23.105	23.7684	23.4644	22.0188	22.5632	22.2625
MSMEG_3217	1.20779	3.08424	23.375	23.0763	23.5212	24.5534	24.561	24.4815
MSMEG_3219	-1.80375	4.28225	27.2701	27.2448	27.2412	25.483	25.598	25.2638
MSMEG_3220	-0.357197	2.01671	23.2163	23.3207	23.3477	22.8077	22.9896	23.0159
MSMEG_3221	-1.51748	3.10423	25.9786	26.0565	26.1251	24.3565	24.8552	24.396
MSMEG_3235	-0.438688	1.44365	27.9281	27.7326	27.8264	27.281	27.2418	27.6483
MSMEG_3238	0.526095	2.05899	23.071	23.1618	22.892	23.4864	23.7198	23.4969
MSMEG_3240	-2.49762	3.81454	23.9888	23.9055	24.4478	21.6945	21.4978	21.657
MSMEG_3246	-0.10722	0.388855	24.3022	24.0351	24.3063	24.2235	23.9702	24.1281
MSMEG_3247	-0.0745366	0.334714	27.6504	27.5435	27.7206	27.4609	27.5177	27.7122
MSMEG_3255	-1.15562	2.628	25.7956	25.6907	25.3458	24.3473	24.6534	24.3645
MSMEG_3257	0.246555	0.871881	27.2338	27.3565	27.0345	27.4921	27.2796	27.5928
MSMEG_3259	-1.3522	1.86995	20.9482	21.4282	21.9803	20.2142	20.221	19.8649
MSMEG_3261	-0.121572	0.212369	23.3333	23.8432	23.2211	23.5598	23.2938	23.1794
MSMEG_3262	-1.33371	3.6201	23.8185	24.1489	23.9726	22.7434	22.6055	22.59
MSMEG_3265	2.90506	3.52631	21.8805	22.073	22.065	24.6277	24.7207	25.3853
MSMEG_3280	-0.182952	0.782085	22.7712	22.7135	22.6258	22.578	22.3273	22.6563
MSMEG_3281	-0.68197	0.845307	20.1396	20.0445	20.4914	19.9984	18.8572	19.774
MSMEG_3308	-1.14511	3.42092	25.5259	25.5257	25.2198	24.2611	24.2615	24.3135
MSMEG_3309	1.5855	2.98852	22.3293	22.4172	22.5559	24.0429	23.7085	24.3074
MSMEG_3317	0.597033	1.5483	22.4817	22.7718	22.3768	23.3605	23.1591	22.9019
MSMEG_3357	-1.25882	2.35121	22.0612	22.1361	22.7434	20.998	21.0806	21.0856
MSMEG_3380	-0.42861	1.17913	23.9296	24.3619	23.8499	23.7385	23.5284	23.5886
MSMEG_3381	3.75274	4.98806	20.1482	20.0763	19.7467	23.7171	23.6601	23.8521
MSMEG_3419	-1.99706	3.01086	26.3322	26.2	26.4502	24.0219	24.7534	24.2159
MSMEG_3422	0.821359	1.61741	25.562	26.0187	25.4409	26.4739	26.2435	26.7682
MSMEG_3430	-0.000771205	0.00124143	22.9637	23.5598	23.0636	23.3633	23.11	23.1114
MSMEG_3434	-1.43904	4.07354	25.0582	24.9504	25.0858	23.4378	23.6461	23.6933
MSMEG_3461	1.53432	4.31879	28.1342	27.9066	27.8948	29.5574	29.5119	29.4691
MSMEG_3465	1.8909	2.1183	21.9174	21.6039	22.2169	23.3062	23.6605	24.4442
MSMEG_3477	-2.30423	3.20762	23.5641	23.7887	24.0116	21.2101	21.8683	21.3732
MSMEG_3479	-1.47603	3.79244	31.8504	31.7971	32.1278	30.4444	30.5056	30.3971
MSMEG_3489	-0.98355	1.87547	24.0642	24.5808	24.67	23.4271	23.2355	23.7017
MSMEG_3492	0.486451	1.6419	22.711	23.0398	22.7722	23.346	23.1632	23.4732
MSMEG_3493	-2.28614	3.74977	28.0872	27.9025	28.4627	25.9461	25.8017	25.8461
MSMEG_3494	0.06228	0.259615	25.3138	25.5045	25.1784	25.3682	25.411	25.4044
MSMEG_3505	2.17534	4.11546	21.9598	21.8061	21.7836	23.7962	24.0865	24.1929
MSMEG_3507	-0.200143	0.645839	30.3615	30.5779	30.5535	30.4681	30.3636	30.0609
MSMEG_3512	-0.10563	0.107464	21.845	21.6775	22.3629	21.4042	22.3936	21.7708
MSMEG_3513	2.26386	2.78951	20.8863	20.3433	20.5614	22.4314	22.8421	23.3091
MSMEG_3514	1.36885	1.41316	21.5845	21.6287	21.4589	22.431	22.5266	23.821
MSMEG_3534	0.669164	1.65112	20.6016	20.3624	20.5126	21.4068	20.8321	21.2452
MSMEG_3540	-2.24273	3.41338	26.3374	25.9837	26.5623	24.2207	24.1009	23.8335
MSMEG_3560	-1.35743	1.63445	23.6731	23.518	23.2024	21.7705	22.8132	21.7376
MSMEG_3564	0.342773	0.605041	26.8082	26.0644	26.6964	26.6861	27.0466	26.8648
MSMEG_3569	0.740656	2.58177	22.2627	22.5562	22.2033	23.1218	23.0576	23.0647
MSMEG_3574	1.11712	2.92936	23.342	23.0833	23.0849	24.1366	24.2367	24.4882
MSMEG_3594	1.614	2.6805	23.587	23.6869	22.9798	25.1409	24.9798	24.975
MSMEG_3595	-1.49442	2.7187	24.5755	24.6128	24.6054	23.4977	23.0072	22.8055
MSMEG_3598	-0.409612	1.04845	24.4434	24.3218	24.6577	23.836	23.9977	24.3604
MSMEG_3599	-0.812113	1.64019	26.5748	26.5667	27.0082	25.7237	25.74	26.2497
MSMEG_3605	0.27607	0.339902	23.6694	24.0135	23.882	23.7754	23.8471	24.7707
MSMEG_3608	1.40959	2.76395	21.4288	21.3189	21.3763	22.7042	22.5094	23.1392
MSMEG_3618	-1.83665	2.84837	28.6588	28.5254	29.2635	26.9187	26.929	27.0901
MSMEG_3619	-0.997395	2.96984	27.3103	27.5701	27.4032	26.4765	26.5584	26.2564
MSMEG_3620	1.5227	2.04302	26.0825	25.7024	25.872	27.5355	27.8562	26.8333
MSMEG_3621	-0.574774	1.13741	23.0635	23.0627	23.518	22.3441	22.6013	22.9745
MSMEG_3623	-0.496402	2.1227	24.0726	24.116	23.9933	23.6231	23.6871	23.3825
MSMEG_3625	1.45824	4.10736	23.8089	23.8645	23.6166	25.1297	25.2748	25.2602
MSMEG_3626	-1.87615	2.39809	27.1767	26.2738	27.166	25.1935	24.8811	24.9134
MSMEG_3627	-1.23167	5.40136	26.0017	26.0851	26.0431	24.766	24.8141	24.8547
MSMEG_3632	1.94576	3.94644	25.3598	24.9733	24.9909	27.0005	27.0974	27.0634
MSMEG_3634	0.874826	1.80435	25.9228	26.0096	25.3298	26.6971	26.5673	26.6224
MSMEG_3636	-0.412669	2.80142	23.7035	23.5783	23.7336	23.3076	23.22	23.2497
MSMEG_3640	2.34711	5.39604	26.6512	26.6698	26.4688	28.9498	28.9061	28.9751
MSMEG_3641	-1.50646	4.17902	24.2058	24.2231	24.4351	22.8554	22.7943	22.6949
MSMEG_3642	1.50496	1.89975	25.3779	25.1079	25.4576	26.2721	26.764	27.4223
MSMEG_3647	-1.40912	4.57418	28.4202	28.2689	28.3176	26.9223	27.0102	26.8469
MSMEG_3648	0.12532	0.172999	27.2357	26.9583	26.9974	27.4853	27.4116	26.6705
MSMEG_3654	-1.28112	3.23708	24.2515	24.4987	24.6004	23.0154	23.235	23.2568
MSMEG_3657	1.70495	3.13974	21.7478	21.7385	21.692	23.4223	23.1215	23.7493
MSMEG_3662	-0.0200818	0.0294332	24.9493	25.2666	24.5289	25.056	24.7745	24.8541
MSMEG_3674	-2.5016	3.21828	28.6621	28.3885	29.2436	26.2513	26.3339	26.204
MSMEG_3678	-1.05542	3.05339	21.1522	21.2377	20.8956	19.9406	20.1461	20.0325
MSMEG_3685	-1.34356	2.57513	22.7675	22.7807	22.5524	21.5987	21.4851	20.9862
MSMEG_3706	1.3178	1.22879	21.4616	21.2253	21.9445	22.4075	22.4014	23.7759
MSMEG_3733	-2.35674	3.65767	28.1807	27.9665	28.4758	25.964	25.9618	25.6271
MSMEG_3738	-1.61054	3.42866	22.3492	22.3564	21.9851	20.648	20.7371	20.474
MSMEG_3739	-2.39882	4.26976	26.2061	26.3367	26.6017	24.0709	24.0141	23.8631
MSMEG_3740	-1.70952	4.50028	24.5477	24.5107	24.585	22.9697	22.8498	22.6954
MSMEG_3741	-0.82373	2.13759	24.3244	24.557	23.9958	23.4606	23.4972	23.4481
MSMEG_3746	-0.987593	3.76593	23.591	23.5015	23.713	22.5649	22.6921	22.5859
MSMEG_3752	-0.971791	1.17511	23.0007	22.2622	22.5032	21.6648	22.1498	21.0362
MSMEG_3753	-0.281507	0.68674	25.3225	25.6057	25.1686	25.354	24.973	24.9253
MSMEG_3754	-1.86728	3.87453	24.7601	24.5943	24.9857	22.9085	22.8075	23.0223
MSMEG_3758	0.623346	1.32376	22.2285	22.271	22.7834	22.7937	23.1521	23.207
MSMEG_3764	0.747089	1.94494	23.4758	23.4038	22.9565	24.0955	24.0379	23.944
MSMEG_3766	-1.9945	2.45925	23.4009	23.218	24.1819	21.3576	21.669	21.7908
MSMEG_3769	0.238417	0.478841	23.1029	22.7932	22.9601	22.8086	23.2991	23.4639
MSMEG_3770	-0.780372	1.45119	22.7691	22.8144	23.4681	22.274	22.4003	22.0362
MSMEG_3771	-1.85165	4.0495	24.2705	24.3037	24.4488	22.6883	22.4287	22.3511
MSMEG_3772	2.15535	4.50886	23.2523	23.2106	22.9747	25.1964	25.3892	25.318
MSMEG_3773	0.449362	0.737726	24.6886	25.0536	24.0955	25.0553	25.0773	25.0531
MSMEG_3775	-1.07965	2.91706	26.721	26.9239	26.8127	25.9757	25.6221	25.6209
MSMEG_3776	1.41628	3.21836	23.751	23.9399	23.4749	25.1971	25.0366	25.1811
MSMEG_3777	0.477988	1.69376	24.8992	24.7351	24.9864	25.448	25.1423	25.4643
MSMEG_3778	0.350927	0.846919	24.4961	24.2728	24.718	25.0189	24.5623	24.9586
MSMEG_3782	2.25335	3.15713	22.3155	22.9742	22.2339	24.7712	24.6828	24.8297
MSMEG_3791	0.438713	0.412012	27.8743	27.4482	27.5153	27.5008	27.748	28.9051
MSMEG_3793	-1.59704	4.04866	27.1877	27.2859	27.4669	25.8035	25.6083	25.7375
MSMEG_3795	-2.14877	3.74821	25.4592	25.4084	25.8527	23.4296	23.5557	23.2888
MSMEG_3804	-3.14429	3.8882	25.7673	25.6442	26.2301	22.846	22.8696	22.4932
MSMEG_3808	-0.193955	0.557372	20.7171	20.6447	20.9418	20.4423	20.4542	20.8252
MSMEG_3810	-0.333427	0.760255	27.0338	27.0989	27.3575	27.1816	26.6492	26.6591
MSMEG_3811	-1.68152	2.98304	29.2768	29.4166	29.8401	27.628	27.9146	27.9463
MSMEG_3829	-1.92464	3.02112	23.9473	24.2291	23.8298	21.8797	22.4496	21.9029
MSMEG_3833	-0.401737	1.90708	29.5624	29.6288	29.3991	29.1349	29.234	29.0162
MSMEG_3839	-0.391324	1.42297	22.1536	21.873	22.0201	21.578	21.4805	21.8142
MSMEG_3846	1.67833	1.77834	21.4626	21.2412	21.5071	22.9513	22.4364	23.8582
MSMEG_3858	-1.02999	1.97312	25.9687	25.9853	25.3201	24.7782	24.8022	24.6038
MSMEG_3864	2.36711	2.26046	22.0978	21.9831	21.9775	23.6287	24.4056	25.1255
MSMEG_3872	-0.61268	1.98318	21.6694	21.5983	21.2971	21.0144	20.9393	20.7731
MSMEG_3877	-0.171416	0.343364	22.0088	21.8738	21.6949	22.0501	21.4365	21.5767
MSMEG_3881	-0.0174046	0.0277101	24.871	25.0289	24.3385	24.777	24.7331	24.6762
MSMEG_3887	-1.40132	0.887138	22.5079	20.1862	20.4524	19.7611	19.6276	19.5538
MSMEG_3888	1.00371	2.16282	21.5965	21.615	22.1632	22.7279	22.7389	22.9189
MSMEG_3894	0.102051	0.115209	26.7713	27.1291	26.0466	26.7365	26.6788	26.8379
MSMEG_3895	0.642217	2.67805	26.0445	26.0635	25.9805	26.6206	26.553	26.8416
MSMEG_3896	-1.18997	2.0787	25.7356	25.5025	26.0441	24.6123	24.8748	24.2252
MSMEG_3898	-0.622769	0.306348	24.5113	24.9743	24.1475	24.5195	24.8946	22.3506
MSMEG_3902	-0.540019	2.23486	25.3798	25.6524	25.4193	25.042	24.933	24.8566
MSMEG_3903	-2.95203	2.74738	26.2565	26.1776	27.0688	23.1901	23.3556	24.1011
MSMEG_3932	-0.595889	0.554852	22.6759	22.7671	21.6277	22.0982	22.0319	21.1529
MSMEG_3962	1.48133	1.87254	26.8697	26.454	26.9762	28.09	27.8038	28.8501
MSMEG_4042	-0.805337	2.11881	22.3499	22.1705	22.249	21.7304	21.4206	21.2023
MSMEG_4064	0.519403	0.623969	22.2334	22.3947	22.146	23.272	23.0005	22.0597
MSMEG_4111	0.947385	2.65243	19.8743	19.8803	20.1744	20.7621	21.0845	20.9245
MSMEG_4112	1.44991	1.05881	21.6841	21.9343	21.5039	23.6445	23.9225	21.9051
MSMEG_4114	1.17568	2.08572	23.0191	23.1706	22.7958	23.8761	24.0463	24.5902
MSMEG_4121	-1.51622	1.87434	23.0465	22.5581	23.7828	21.5433	21.6859	21.6094
MSMEG_4125	1.27721	3.08588	21.3391	21.4093	21.5184	22.6551	22.9451	22.4983
MSMEG_4143	-1.06258	2.21825	21.9296	21.6548	21.5024	20.7991	20.3206	20.7793
MSMEG_4145	-0.147895	0.191119	21.9272	21.8438	21.1762	21.7035	21.1482	21.6518
MSMEG_4162	1.24317	1.81031	20.4075	20.5456	20.7326	21.9719	21.2367	22.2066
MSMEG_4165	-1.44346	3.2392	21.5962	21.8436	21.577	20.3916	20.2936	20.0013
MSMEG_4167	1.14184	1.61065	23.0267	23.1808	22.2139	23.9807	23.7197	24.1465
MSMEG_4180	0.78526	1.56826	24.4605	24.501	23.8094	25.005	24.9748	25.1469
MSMEG_4181	-1.01428	3.88221	23.7415	23.707	23.6624	22.8204	22.6383	22.6095
MSMEG_4185	0.652774	1.39681	23.6383	23.3203	23.6844	23.9062	24.1522	24.543
MSMEG_4188	-0.624761	1.86809	21.7879	21.7034	22.0904	21.0757	21.2428	21.3889
MSMEG_4189	0.689077	1.48586	23.148	23.2341	23.7619	24.0255	23.9302	24.2556
MSMEG_4193	-0.496984	2.05033	24.8621	25.1996	24.9788	24.5826	24.4771	24.4898
MSMEG_4195	-0.443717	1.60267	22.385	22.5426	22.162	21.8564	21.8576	22.0445
MSMEG_4200	1.37721	4.09417	23.9581	23.7972	23.9479	25.2729	25.1671	25.3948
MSMEG_4207	-1.9773	2.08361	25.616	25.3318	26.1762	24.2009	23.1146	23.8765
MSMEG_4210	-1.32662	1.78019	25.6738	25.7763	25.973	25.0522	23.9351	24.4559
MSMEG_4217	-1.73132	4.98484	30.0188	30.1051	30.2037	28.4356	28.3774	28.3207
MSMEG_4220	-0.991199	2.38677	21.6117	21.7554	22.0987	20.8331	20.9771	20.6819
MSMEG_4221	-0.295675	0.378379	22.0835	22.4575	22.6465	21.8303	21.8036	22.6666
MSMEG_4222	-0.582239	2.42061	26.0964	26.3231	26.0697	25.6238	25.6437	25.4749
MSMEG_4231	-1.12918	1.61374	21.5041	22.3549	22.4969	20.8474	21.127	20.994
MSMEG_4232	-0.332017	0.408829	22.7545	23.0469	22.2568	22.7809	22.3864	21.8948
MSMEG_4240	-0.312919	0.802385	23.2981	23.1966	23.7748	23.1234	23.0584	23.149
MSMEG_4242	2.02763	2.55589	21.4884	21.9686	21.7858	24.1376	23.9528	23.2353
MSMEG_4244	-0.992039	1.586	21.7435	21.3793	22.3541	20.7671	20.8292	20.9045
MSMEG_4254	-1.03754	2.75833	25.3333	25.1175	25.5305	24.151	24.323	24.3947
MSMEG_4256	-2.27985	2.95322	25.0675	24.772	25.6891	22.9094	22.9468	22.8328
MSMEG_4262	-0.257599	0.829398	21.7905	21.5639	21.7694	21.202	21.5581	21.5909
MSMEG_4268	-0.73936	2.33006	23.7621	23.7963	24.1081	23.1555	23.2651	23.0278
MSMEG_4270	0.334391	1.41503	25.4515	25.2169	25.2685	25.7209	25.4792	25.74
MSMEG_4272	-0.911739	2.36122	29.5225	29.5394	29.835	28.9459	28.6772	28.5387
MSMEG_4275	-0.72015	3.12503	22.464	22.6289	22.4146	21.795	21.8492	21.7029
MSMEG_4276	1.54307	3.5162	24.8485	24.7174	25.1419	26.3713	26.5101	26.4557
MSMEG_4278	2.14299	4.09389	25.3596	25.0057	25.2546	27.364	27.2086	27.4763
MSMEG_4281	-0.885181	2.86972	25.6495	25.5668	25.7837	24.6177	24.9341	24.7926
MSMEG_4283	-1.45987	4.46287	29.0366	29.0156	29.1961	27.5617	27.7073	27.5996
MSMEG_4290	2.65132	3.66646	27.271	27.078	27.4992	29.7068	29.8338	30.2616
MSMEG_4295	-1.51214	4.39573	25.8915	25.8994	26.0546	24.5449	24.4067	24.3574
MSMEG_4296	-0.0372931	0.0732929	23.6361	23.2565	23.2561	23.1202	23.3615	23.5552
MSMEG_4298	1.23071	2.01034	30.1524	30.5296	29.7789	31.1827	31.6852	31.2851
MSMEG_4299	0.942766	1.86194	25.062	24.8842	24.55	25.7681	25.4886	26.0678
MSMEG_4301	1.15371	1.50236	24.1107	23.1616	23.9517	24.6385	24.757	25.2896
MSMEG_4306	0.393007	0.372716	26.7354	27.3583	25.8453	27.137	26.9993	26.9817
MSMEG_4307	0.479724	0.485296	23.6613	23.6433	22.3987	23.8535	23.5168	23.7722
MSMEG_4313	-0.534057	1.40202	29.1847	29.2482	28.9026	28.7774	28.3024	28.6535
MSMEG_4320	-1.28446	2.5221	23.7222	24.0984	23.5594	22.7395	22.3359	22.4513
MSMEG_4321	0.30215	0.517366	25.7067	25.4364	24.9226	25.8344	25.6913	25.4464
MSMEG_4323	1.29437	2.46224	24.5362	24.3364	24.4083	25.5128	25.5289	26.1223
MSMEG_4325	-1.37462	5.28092	28.7912	28.7886	28.7799	27.4839	27.4134	27.3386
MSMEG_4326	0.320155	0.695891	28.5516	28.351	27.8789	28.6604	28.4525	28.6292
MSMEG_4327	1.84593	3.87733	26.1227	26.2194	25.9467	28.1374	27.8107	27.8786
MSMEG_4328	0.255445	1.20525	25.7676	25.7527	25.7958	26.0131	25.864	26.2053
MSMEG_4329	-1.01941	1.8029	23.7164	23.8731	24.1249	22.8105	22.5416	23.3041
MSMEG_4330	-1.01665	1.7732	24.3215	23.7994	23.9835	22.6077	23.2738	23.1729
MSMEG_4337	1.64751	3.95624	22.5177	22.3008	22.6128	24.2379	24.0847	24.0513
MSMEG_4340	1.533	2.25949	26.5136	26.6126	25.8089	27.7715	27.6784	28.0842
MSMEG_4342	-0.490929	0.833057	25.753	26.1421	26.3412	25.66	25.1903	25.9133
MSMEG_4353	-1.84563	4.20903	23.6714	23.5361	23.6607	21.7334	21.9604	21.6375
MSMEG_4358	-0.505541	0.700887	21.6991	22.1094	22.2645	22.083	21.2148	21.2586
MSMEG_4361	-2.44775	4.88356	24.1661	24.4127	24.2982	21.7349	21.9487	21.8501
MSMEG_4367	1.8898	2.27442	27.2057	27.3594	26.4026	29.2238	28.7312	28.6822
MSMEG_4381	2.18488	3.47937	22.6435	22.3443	22.259	24.6433	24.8379	24.3202
MSMEG_4382	-1.14041	3.66332	23.5642	23.5974	23.5068	22.4607	22.5358	22.2506
MSMEG_4396	-0.765287	1.51302	23.3542	22.8588	23.5753	22.4098	22.695	22.3877
MSMEG_4399	1.35923	3.27887	22.6235	22.9006	22.6513	24.1798	23.8835	24.1898
MSMEG_4401	0.205476	0.277613	25.0741	25.6015	24.9837	25.3246	25.8583	25.0928
MSMEG_4454	1.42554	2.30127	23.449	23.7373	22.8794	24.8428	24.7821	24.7174
MSMEG_4463	1.41182	3.4142	23.469	23.1705	23.3335	24.6564	24.6272	24.9247
MSMEG_4464	1.1643	2.68312	24.4194	24.2813	24.1084	25.2654	25.3312	25.7053
MSMEG_4474	0.751417	1.72051	23.7122	23.5194	23.767	24.4316	24.0944	24.7268
MSMEG_4476	-1.44713	3.20169	26.4022	26.5318	26.1825	25.1392	24.8494	24.7866
MSMEG_4485	1.70653	2.77892	24.6039	24.6448	25.186	26.6108	26.6767	26.2669
MSMEG_4488	-0.116789	0.297507	20.7875	20.9674	20.6662	20.9509	20.6067	20.5132
MSMEG_4497	-1.64338	4.45959	22.4288	22.2997	22.1785	20.63	20.7313	20.6156
MSMEG_4504	-1.58336	4.55537	23.4439	23.5028	23.6629	22.0148	21.9475	21.8972
MSMEG_4527	-1.31718	5.15549	25.142	25.0542	25.1673	23.8412	23.7525	23.8183
MSMEG_4528	-1.48258	2.74755	24.955	25.0408	24.9018	23.61	23.7421	23.0977
MSMEG_4530	-1.55062	3.11919	20.9183	21.0053	21.2671	19.3125	19.7589	19.4673
MSMEG_4533	0.176627	0.941016	26.968	27.1597	27.0204	27.252	27.0999	27.3261
MSMEG_4535	1.46168	1.76735	24.1981	23.8918	24.2091	24.8971	25.6667	26.1202
MSMEG_4537	1.47502	1.94327	23.5859	23.8698	23.3964	24.781	24.7979	25.6982
MSMEG_4538	0.884227	1.38099	21.3576	20.994	20.9319	21.7038	21.7183	22.514
MSMEG_4553	-1.55624	4.16712	27.5911	27.6327	27.6913	26.2444	25.9513	26.0507
MSMEG_4560	-0.932275	2.57134	22.5945	22.823	22.9186	21.6621	21.8605	22.0166
MSMEG_4561	-0.876493	2.86588	22.6138	22.3592	22.3104	21.6246	21.5919	21.4374
MSMEG_4568	0.226034	0.42264	23.3871	23.4391	22.8898	23.3137	23.3232	23.7572
MSMEG_4571	-0.951162	1.47678	25.9216	25.7294	25.7646	24.5896	24.534	25.4385
MSMEG_4572	-1.43612	4.12621	22.3002	22.2332	22.2443	20.8913	20.9206	20.6574
MSMEG_4580	-0.152031	1.31491	23.7829	23.9308	23.943	23.7598	23.7022	23.7386
MSMEG_4583	-0.847097	1.43472	21.0324	20.6657	20.6269	20.2261	20.1096	19.448
MSMEG_4584	-0.75326	1.226	23.6504	24.0833	23.6271	23.3551	23.1992	22.5468
MSMEG_4589	1.32931	2.25866	22.1158	22.136	21.851	23.7009	23.4555	22.9342
MSMEG_4595	-1.89037	3.27019	22.8672	22.5984	23.0969	20.7261	21.0906	21.0748
MSMEG_4598	-1.33576	3.17816	22.4578	22.5133	22.6244	21.4418	21.1496	20.9968
MSMEG_4617	1.97891	2.56433	23.2283	22.9339	22.827	24.6047	24.8095	25.5118
MSMEG_4623	-1.28392	2.44229	22.0412	22.1626	22.4147	20.7898	20.7011	21.2759
MSMEG_4624	-2.01806	3.44961	27.348	27.1885	27.7429	25.3655	25.3131	25.5465
MSMEG_4625	-1.18697	2.35362	27.7673	27.7309	28.3351	26.7142	26.879	26.6791
MSMEG_4626	-1.60112	2.68811	25.5331	25.6081	26.0124	24.0099	24.4466	23.8937
MSMEG_4627	0.160797	0.41572	28.0211	28.3432	27.7847	28.255	28.1533	28.223
MSMEG_4630	0.70518	1.22363	23.0787	22.4836	22.8521	23.5175	23.1462	23.8663
MSMEG_4631	-1.81951	5.07068	26.9996	26.8464	26.8134	25.1008	25.0164	25.0837
MSMEG_4632	-1.33417	3.70534	22.8345	23.0556	23.1248	21.6066	21.6313	21.7744
MSMEG_4633	1.97219	4.00087	23.3106	22.9897	23.2987	25.0516	25.1664	25.2975
MSMEG_4645	-1.22484	3.27597	24.4643	24.4761	24.7311	23.3284	23.4789	23.1896
MSMEG_4646	-1.59698	3.81692	25.7922	25.9071	25.583	24.2821	24.1462	24.0631
MSMEG_4647	-0.927882	1.12626	22.3858	22.5282	22.0869	21.1009	22.1326	20.9839
MSMEG_4650	1.48835	2.50945	22.0294	22.4871	21.8814	23.7879	23.3312	23.744
MSMEG_4651	0.0724335	0.16975	21.3384	21.5781	21.0382	21.4702	21.3449	21.3569
MSMEG_4652	0.988422	2.51068	21.9149	22.1166	21.9013	23.2305	22.9034	22.7641
MSMEG_4658	-0.330004	1.18054	23.4504	23.2657	23.4911	23.078	22.8762	23.2628
MSMEG_4664	1.59962	4.12409	22.9606	22.9273	22.9967	24.4021	24.5551	24.7262
MSMEG_4666	0.791976	2.91735	22.6059	22.3484	22.6168	23.2344	23.3545	23.3581
MSMEG_4671	-1.40211	3.16122	23.2447	23.123	23.5171	22.0682	21.7628	21.8475
MSMEG_4672	-0.506473	1.17307	24.8795	24.6678	25.149	24.6826	24.1995	24.2948
MSMEG_4674	-1.18499	3.48337	29.2648	29.2661	29.2287	28.2037	28.1336	27.8673
MSMEG_4681	-0.749898	2.48187	22.6761	22.4211	22.805	21.8311	21.86	21.9615
MSMEG_4684	0.896729	1.6212	25.2477	25.8431	25.0472	26.3809	26.335	26.1122
MSMEG_4685	1.25124	3.19925	21.5241	21.6082	21.694	22.6215	22.984	22.9745
MSMEG_4686	-1.72322	3.9115	25.0431	24.9319	25.2977	23.4429	23.2917	23.3685
MSMEG_4688	1.14096	2.80648	24.954	24.6428	24.5792	25.8197	25.7324	26.0469
MSMEG_4690	2.14883	2.33647	26.1213	26.0294	26.281	27.7274	28.167	28.9838
MSMEG_4692	-1.44821	4.79145	28.2359	28.2537	28.403	26.8751	26.8747	26.7982
MSMEG_4700	-1.52508	5.07876	26.2716	26.2749	26.4201	24.7676	24.7915	24.8322
MSMEG_4709	-1.06958	2.15673	23.9416	24.189	24.2576	23.4085	22.9997	22.7713
MSMEG_4713	0.467395	0.585262	22.4443	22.7156	21.7012	23.1229	22.6278	22.5126
MSMEG_4722	-1.12225	3.6229	24.6268	24.6066	24.8057	23.5014	23.6853	23.4857
MSMEG_4723	-0.424362	1.20338	22.7258	22.6816	22.5268	22.4623	21.9333	22.2654
MSMEG_4724	-0.377291	1.53075	21.136	21.186	21.4436	20.7569	20.9625	20.9143
MSMEG_4742	0.702261	2.71466	22.3104	22.5643	22.5842	23.1791	23.2628	23.1237
MSMEG_4753	-1.91122	3.76445	25.4382	25.4904	25.6156	23.7625	23.3438	23.7041
MSMEG_4755	1.05396	2.67886	24.7402	24.9524	24.5684	25.965	25.625	25.833
MSMEG_4757	0.733391	0.93825	28.5641	28.3574	28.9152	28.876	29.9753	29.1857
MSMEG_4832	0.576598	0.864002	21.5484	21.366	21.917	22.6619	22.1525	21.7468
MSMEG_4833	1.02818	2.52714	22.0314	22.2591	21.8466	23.1535	23.2037	22.8645
MSMEG_4884	-2.58709	3.44645	24.7926	24.6409	24.5333	22.5035	21.867	21.8351
MSMEG_4890	0.977333	1.30952	25.346	24.6364	25.7091	26.2	26.4744	25.9491
MSMEG_4891	0.214958	0.461775	26.8588	27.4159	26.9494	27.0952	27.4466	27.3272
MSMEG_4899	-1.80204	4.22895	24.2636	24.2352	24.5492	22.5627	22.5164	22.5628
MSMEG_4905	-0.275544	0.477874	22.3945	22.3502	22.8013	22.441	22.4487	21.8297
MSMEG_4906	-1.90197	4.05981	28.2732	28.222	28.4361	26.5245	26.4894	26.2116
MSMEG_4907	0.228348	0.241788	24.9852	25.7326	26.2569	25.9895	25.8436	25.8267
MSMEG_4908	-1.26506	3.41788	25.3659	25.637	25.4682	24.3775	24.2062	24.0922
MSMEG_4911	2.08118	1.76003	22.4326	21.7345	22.9967	23.7984	24.4695	25.1395
MSMEG_4914	0.224148	0.681241	23.1211	23.0053	22.7073	23.2496	23.2572	22.9993
MSMEG_4915	0.475065	1.04434	24.3126	23.8305	24.1972	24.4554	24.4094	24.9006
MSMEG_4916	0.960624	0.93086	22.439	22.7965	22.7762	23.1755	23.1505	24.5676
MSMEG_4917	0.23126	0.558339	24.4048	24.6301	24.7323	25.0699	24.533	24.858
MSMEG_4920	1.34943	2.54995	27.0464	27.239	26.629	28.2321	28.2089	28.5215
MSMEG_4921	-2.06105	3.73325	28.912	29.0274	29.2269	26.8775	27.2437	26.862
MSMEG_4934	0.44846	0.912333	22.4341	22.5158	22.8274	22.8552	22.8352	23.4321
MSMEG_4935	1.11027	2.20001	25.2155	25.2388	24.6339	26.2813	26.1114	26.0263
MSMEG_4936	1.36847	2.63649	26.8365	26.6218	27.0238	28.0177	28.0534	28.5165
MSMEG_4937	0.750402	1.10274	23.9719	23.8392	24.3208	24.3827	24.6564	25.344
MSMEG_4938	0.99072	2.74933	27.6935	27.7265	27.7331	28.6188	28.5357	28.9708
MSMEG_4939	-0.265989	0.887732	25.4822	25.4731	25.2157	25.0158	25.0151	25.3422
MSMEG_4940	-0.999371	2.44179	25.3625	25.0347	25.5518	24.3747	24.3835	24.1926
MSMEG_4948	-0.660054	3.44839	21.6562	21.7973	21.8445	21.0964	21.1365	21.0851
MSMEG_4950	0.541873	1.00378	24.2833	24.7097	23.9207	25.0027	24.6336	24.903
MSMEG_4954	-1.83191	3.863	27.5631	27.4599	27.7575	25.5879	25.7898	25.9071
MSMEG_4955	0.558678	2.09006	23.6058	23.5757	23.3811	24.0158	23.9654	24.2574
MSMEG_4956	0.802261	2.26472	26.9133	27.069	26.5774	27.6678	27.6129	27.6857
MSMEG_4957	-1.20573	3.88028	24.3416	24.2767	24.4691	23.0642	23.1339	23.272
MSMEG_4958	0.0651029	0.101832	22.7618	22.6687	23.0996	22.6613	22.7848	23.2794
MSMEG_4959	-0.108222	0.286407	24.7127	24.7057	24.5799	24.5619	24.3025	24.8092
MSMEG_4971	-0.603268	2.88222	25.5065	25.5326	25.2964	24.8484	24.8517	24.8256
MSMEG_4975	1.02067	1.39108	19.9079	19.8595	19.9287	20.5824	20.5731	21.6025
MSMEG_4976	-0.932941	4.99084	27.1536	27.1481	27.1571	26.228	26.1581	26.2739
MSMEG_4977	-0.165136	0.79725	24.1118	24.0095	23.8411	23.8115	23.921	23.7345
MSMEG_4978	-0.604764	0.963661	21.2334	21.1911	22.0839	20.8146	20.9538	20.9259
MSMEG_4985	0.65184	1.38342	27.1918	27.1592	26.5449	27.6072	27.7323	27.5119
MSMEG_4999	-0.313392	0.700396	22.7122	22.6495	22.8158	22.2768	22.1577	22.8028
MSMEG_5002	-0.342916	1.17602	24.2411	24.0976	23.7989	23.6333	23.6948	23.7808
MSMEG_5006	-1.4118	4.17657	25.545	25.7413	25.743	24.343	24.1747	24.2763
MSMEG_5016	-1.48509	2.25232	25.5855	25.6304	25.4284	24.5839	23.7029	23.9021
MSMEG_5017	-0.795048	2.71997	22.8311	22.6394	22.9651	22.0236	21.9181	22.1088
MSMEG_5029	-1.31127	2.97419	23.4308	23.5086	23.4198	22.17	22.3901	21.8653
MSMEG_5037	0.939318	3.02035	25.4206	25.3077	25.098	26.1881	26.1414	26.3147
MSMEG_5049	-0.992638	3.56063	26.0805	25.9359	26.2105	25.0479	25.0744	25.1266
MSMEG_5055	0.483758	1.97253	26.1569	26.1369	25.9964	26.6174	26.7223	26.4018
MSMEG_5058	-1.07316	5.10614	25.0677	24.961	25.0207	23.9677	23.9055	23.9567
MSMEG_5061	-0.571634	3.10684	24.5167	24.3793	24.5595	23.8615	23.9668	23.9124
MSMEG_5064	1.43042	3.32268	21.8712	22.1424	22.3171	23.4846	23.5097	23.6278
MSMEG_5068	-1.64029	1.62298	22.8374	22.6078	22.4335	21.7946	20.9124	20.2508
MSMEG_5070	-1.3367	4.05638	26.3102	26.2705	26.0506	24.9106	24.841	24.8697
MSMEG_5073	-0.0545635	0.0880128	24.2913	24.2729	23.7592	23.9996	24.3085	23.8517
MSMEG_5078	0.851171	1.25421	22.743	22.7665	22.7732	23.4595	23.1529	24.2238
MSMEG_5081	-2.4505	3.64614	30.0223	29.557	30.089	27.5051	27.5657	27.2461
MSMEG_5085	-0.367593	1.63955	22.7691	22.6802	22.6459	22.195	22.2823	22.5151
MSMEG_5086	-1.48533	3.23971	22.9453	22.8461	22.9815	21.2002	21.4193	21.6974
MSMEG_5087	1.71771	2.09241	21.8402	22.1737	22.494	24.0509	23.3124	24.2977
MSMEG_5089	-2.21004	4.65194	24.4135	24.3617	24.6294	22.3429	22.2694	22.1622
MSMEG_5103	1.27626	2.35349	22.1168	21.6664	22.2239	23.2169	23.5451	23.0738
MSMEG_5104	0.603968	1.59299	25.4396	25.4053	25.1447	25.6593	25.9805	26.1618
MSMEG_5114	0.0692355	0.0724984	22.2366	22.3017	23.044	22.228	22.599	22.9629
MSMEG_5118	1.29114	1.92801	20.0772	19.8762	20.2949	21.1531	21.0609	21.9078
MSMEG_5119	1.92837	4.63911	21.4743	21.4159	21.5426	23.5458	23.3932	23.2788
MSMEG_5121	1.14678	2.80607	23.886	23.7341	23.8901	24.7037	25.0985	25.1485
MSMEG_5122	-1.80091	4.13694	30.3928	30.2645	30.5981	28.7069	28.5678	28.5782
MSMEG_5132	-1.01153	1.90022	26.2945	26.1562	26.7819	25.6402	25.3972	25.1607
MSMEG_5150	-0.863609	1.84486	23.8084	23.9769	23.2971	22.7755	22.8081	22.908
MSMEG_5154	0.185576	0.338343	25.5526	25.6346	26.0201	26.1787	25.9977	25.5875
MSMEG_5156	-1.39374	2.67168	22.1475	22.5418	22.262	21.0828	20.6051	21.0822
MSMEG_5182	0.896341	1.28585	23.338	23.7633	22.7725	24.2495	24.4223	23.8911
MSMEG_5183	0.317177	0.710875	26.1491	26.2806	25.7562	26.5513	26.4601	26.126
MSMEG_5184	1.34182	3.43886	23.4283	23.5275	23.7405	24.8855	24.7862	25.05
MSMEG_5185	-1.09835	1.67496	22.8462	22.7558	22.0733	21.4317	21.7702	21.1785
MSMEG_5191	-0.267502	1.53539	25.4097	25.5556	25.4598	25.3167	25.0827	25.2233
MSMEG_5196	-1.83969	2.00289	27.3192	27.1909	26.7838	25.5737	25.6701	24.531
MSMEG_5197	1.70134	3.28659	23.5987	23.5057	23.9679	25.2193	25.5103	25.4466
MSMEG_5198	-1.43739	2.76921	25.7202	26.0799	25.6303	24.6071	24.1426	24.3686
MSMEG_5199	0.415389	1.15868	27.0662	27.2692	26.7379	27.5633	27.4221	27.334
MSMEG_5210	-0.458059	1.88279	21.3444	21.4362	21.4021	21.037	21.0439	20.7278
MSMEG_5211	1.24791	2.2729	23.168	23.0485	23.4525	24.1439	24.8112	24.4575
MSMEG_5222	-0.902292	3.42737	25.4283	25.6399	25.6528	24.6969	24.717	24.6003
MSMEG_5224	1.05473	1.71569	22.8881	22.4702	21.9555	23.4732	23.3856	23.6192
MSMEG_5225	-0.840897	1.53613	26.1618	25.9183	26.3593	25.5284	25.5185	24.8698
MSMEG_5239	0.250617	1.35751	26.9392	27.1566	27.0431	27.3862	27.3197	27.185
MSMEG_5240	1.12624	3.63328	27.9134	27.7272	27.8918	29.0683	28.84	29.0029
MSMEG_5244	-1.21027	1.54302	22.2056	22.32	21.7997	20.5929	20.5533	21.5483
MSMEG_5245	-1.70975	2.91001	21.7039	21.7965	21.1973	19.8892	20.0039	19.6754
MSMEG_5246	-0.36928	0.886224	21.3049	21.5863	21.0903	21.0532	21.1209	20.6995
MSMEG_5248	-0.0610536	0.0861005	24.8526	24.6101	24.9912	24.3473	25.1253	24.7982
MSMEG_5249	1.66493	5.4878	26.729	26.729	26.7229	28.4324	28.3016	28.4415
MSMEG_5250	0.722043	2.06748	24.3512	24.118	24.4644	24.9013	24.9468	25.2517
MSMEG_5258	-0.102639	0.164026	25.9066	26.0909	25.4173	25.8279	25.8222	25.4568
MSMEG_5261	-0.442006	0.918366	23.85	24.1349	23.4525	23.3434	23.5672	23.2008
MSMEG_5263	-1.63901	4.07374	30.3088	30.3395	30.511	28.8564	28.7919	28.5938
MSMEG_5265	1.6958	2.40886	23.8345	23.4219	24.262	25.5277	25.2866	25.7915
MSMEG_5270	0.677479	1.47193	25.2954	25.7329	25.0864	26.2308	26.0138	25.9025
MSMEG_5273	1.00308	2.01896	28.788	29.0142	28.4841	29.9821	29.8378	29.4755
MSMEG_5274	-1.48725	3.82396	22.3781	22.6957	22.411	20.9424	21.0331	21.0476
MSMEG_5276	0.484083	0.846268	23.4043	23.5551	22.7354	23.7017	23.8683	23.5772
MSMEG_5277	1.04104	1.96402	23.6977	23.2328	23.9858	24.5492	24.684	24.8062
MSMEG_5291	1.03036	2.77522	22.2791	22.1094	22.2468	22.9965	23.42	23.3099
MSMEG_5319	0.294603	0.520308	21.2689	20.9703	21.2939	21.0293	21.6164	21.7711
MSMEG_5328	-1.34538	2.07077	27.2908	27.1379	27.7346	26.1372	26.3562	25.6337
MSMEG_5335	0.207607	0.166356	21.4491	21.8355	21.7587	21.3808	21.4881	22.7973
MSMEG_5342	-1.42213	3.20646	25.0481	24.7678	24.7342	23.284	23.6366	23.3632
MSMEG_5343	-2.15814	2.98121	24.6267	23.959	24.1876	22.4114	21.875	22.0125
MSMEG_5352	1.23806	2.73466	21.9236	22.4124	22.2193	23.4463	23.5683	23.2549
MSMEG_5368	-0.42039	1.06615	25.8617	25.6175	25.3375	25.2361	25.3394	24.98
MSMEG_5404	-0.796409	1.97178	23.4325	23.0592	23.4936	22.5365	22.3352	22.7244
MSMEG_5412	-1.44088	4.32179	30.0452	29.9053	30.0307	28.6735	28.522	28.4629
MSMEG_5414	-1.66224	3.34277	24.362	24.4478	24.8122	22.89	23.0032	22.7421
MSMEG_5415	0.696054	1.43468	29.8767	30.089	29.3391	30.4083	30.523	30.4617
MSMEG_5422	-0.761187	3.47489	24.6977	24.6896	24.621	23.886	24.025	23.8136
MSMEG_5427	1.49342	3.71414	26.072	26.2242	26.0022	27.6	27.4289	27.7499
MSMEG_5428	-1.78688	4.10685	26.0051	26.0828	25.7463	24.1431	24.1037	24.2269
MSMEG_5431	1.04106	2.38984	25.5195	25.3336	25.3935	26.3668	26.7802	26.2227
MSMEG_5435	-0.562557	2.24438	25.6375	25.7709	25.7695	25.1095	25.347	25.0338
MSMEG_5438	-2.13508	3.64828	22.7797	22.9417	23.274	20.6929	20.9611	20.9361
MSMEG_5441	-0.103213	0.216639	22.3763	22.473	22.8991	22.3043	22.6184	22.5159
MSMEG_5442	2.03789	2.47825	22.2591	21.8633	22.6333	23.9031	24.243	24.7233
MSMEG_5448	0.461309	1.15474	21.1751	21.0243	21.5158	21.8362	21.4626	21.8002
MSMEG_5452	-1.29334	3.27523	21.9094	22.2204	22.3254	20.8505	20.8192	20.9054
MSMEG_5471	-0.671205	1.97076	24.0764	24.2803	24.0973	23.2231	23.6733	23.544
MSMEG_5477	-0.117351	0.25302	22.1896	21.8844	22.3408	21.7953	22.0367	22.2307
MSMEG_5479	-2.04689	2.51295	24.3943	24.1646	24.4387	21.9784	22.9028	21.9757
MSMEG_5485	1.06759	1.10274	24.1506	24.66	23.132	25.1584	24.9077	25.0792
MSMEG_5486	-1.74629	3.05612	26.8341	26.6424	27.282	25.2727	25.1093	25.1376
MSMEG_5494	1.02876	2.61295	21.2805	21.2657	21.6796	22.4049	22.341	22.5662
MSMEG_5512	-0.308971	0.688897	23.6309	23.8976	23.9193	23.2343	23.8518	23.4348
MSMEG_5515	2.04826	2.33295	24.8006	24.577	25.5762	26.7475	26.9526	27.3984
MSMEG_5520	0.953419	1.5315	23.8296	23.9231	23.4366	25.1389	24.2966	24.614
MSMEG_5524	1.45232	1.60965	29.3374	29.8703	28.4867	30.8521	30.6626	30.5367
MSMEG_5525	2.05006	3.63712	28.4516	28.7272	28.1976	30.6212	30.439	30.4664
MSMEG_5536	-0.650945	2.10442	22.9725	23.3135	23.3631	22.4879	22.5537	22.6547
MSMEG_5541	1.85442	2.73328	26.0144	25.8811	25.7852	27.3456	27.7092	28.1891
MSMEG_5571	-0.708436	2.47202	21.879	21.6406	21.7255	20.8907	21.2008	21.0282
MSMEG_5576	1.72217	3.07542	21.7555	21.3685	21.7296	23.1918	23.1989	23.6295
MSMEG_5580	-0.808137	1.83086	21.8751	21.9351	22.3329	21.3926	21.3544	20.9716
MSMEG_5614	0.427858	0.642908	23.2527	23.7395	23.0936	24.1972	23.7683	23.4041
MSMEG_5617	-2.16969	2.96439	23.6583	23.7639	24.3002	21.4114	21.9225	21.8795
MSMEG_5629	-0.569539	1.4236	22.4662	22.5248	22.2245	21.7735	22.1419	21.5914
MSMEG_5635	-0.0531063	0.0943166	24.7655	25.1565	25.0612	24.6625	25.2273	24.9341
MSMEG_5639	-0.438372	1.24357	24.4258	24.8313	24.5529	24.3328	23.9467	24.2153
MSMEG_5642	2.13392	3.02515	20.8743	20.3876	20.6931	22.5665	22.6083	23.182
MSMEG_5658	3.04141	3.41269	22.3213	22.0689	22.4219	24.8141	25.4622	25.66
MSMEG_5662	-1.3887	3.21455	23.9631	23.8461	24.1768	22.4028	22.7413	22.6759
MSMEG_5664	1.32736	1.27789	24.126	24.5522	22.9658	25.1528	25.048	25.4253
MSMEG_5666	-1.35447	2.3342	25.0171	25.0012	25.5961	23.9506	24.0146	23.5858
MSMEG_5671	-2.45741	3.96907	24.2002	24.192	24.6708	21.9368	21.9149	21.8391
MSMEG_5672	1.43789	2.37782	27.4674	27.1752	27.411	28.4315	28.7235	29.2122
MSMEG_5675	1.70474	2.73105	23.0483	23.5063	22.8135	24.9482	24.6002	24.9339
MSMEG_5676	-0.238205	0.440564	22.306	22.0061	22.7846	22.1494	22.033	22.1998
MSMEG_5680	2.49051	3.42863	26.1674	26.7418	26.0631	28.9624	28.7664	28.715
MSMEG_5684	2.22079	3.98681	24.5424	24.2363	24.4772	26.426	26.7913	26.7009
MSMEG_5685	-0.304996	0.350042	22.4505	21.5039	21.616	21.7219	21.7884	21.1451
MSMEG_5691	-0.940713	1.64296	22.7515	22.9516	22.7756	21.711	22.3852	21.5604
MSMEG_5695	1.49034	1.78509	22.6274	22.1837	22.7222	23.5405	23.8092	24.6546
MSMEG_5696	-1.41187	3.20241	26.7878	26.9033	26.8572	25.4125	25.2063	25.6939
MSMEG_5701	-0.680882	1.6502	21.3077	21.536	21.2341	20.9266	20.3667	20.742
MSMEG_5702	-1.16688	1.35693	22.7417	23.0546	22.5745	21.3475	21.1546	22.368
MSMEG_5703	-0.174313	0.25589	22.8189	23.3328	22.5722	22.9756	22.7723	22.4531
MSMEG_5704	-1.1805	1.95327	25.938	25.0747	25.3267	24.3115	24.3492	24.1371
MSMEG_5706	-0.646203	1.17342	21.1731	21.7401	21.9991	20.8849	21.1635	20.9253
MSMEG_5707	-0.331771	1.11587	24.5161	24.4855	24.1175	23.9325	24.1197	24.0715
MSMEG_5715	0.721657	1.84257	26.1511	26.0497	26.4086	26.978	26.6641	27.1322
MSMEG_5717	0.572373	0.894777	25.7885	26.157	25.157	26.3257	26.1519	26.342
MSMEG_5720	0.295759	1.10147	25.634	25.7902	25.6488	26.1575	26.0375	25.7653
MSMEG_5721	0.513166	1.71268	25.9665	26.1676	25.8378	26.678	26.486	26.3474
MSMEG_5722	-0.794657	2.12404	24.9473	25.3406	24.8308	24.3092	24.1747	24.2508
MSMEG_5725	2.4014	2.96939	21.5044	21.0437	21.666	23.4672	23.7481	24.203
MSMEG_5727	2.35046	3.8292	22.6598	22.8498	23.2018	25.2654	25.1591	25.3383
MSMEG_5732	-0.242015	0.523856	21.5616	21.8989	21.7078	21.7289	21.1354	21.578
MSMEG_5734	1.47801	3.12298	24.2595	24.0264	24.3772	25.5409	25.6181	25.9382
MSMEG_5735	0.783054	1.73257	21.145	21.0752	21.0192	22.1764	21.4887	21.9234
MSMEG_5736	-0.216017	0.405375	22.0539	22.2759	21.5461	21.8743	21.6615	21.692
MSMEG_5750	-0.41465	1.0275	21.9716	22.119	21.9699	21.935	21.3031	21.5784
MSMEG_5770	-2.31281	3.34083	29.1654	28.74	29.4407	26.8159	26.9349	26.6568
MSMEG_5771	-3.09855	3.19892	27.9895	27.5616	28.6311	25.0965	24.9486	24.8414
MSMEG_5773	-0.182735	0.634086	23.701	23.5372	23.9787	23.5815	23.5617	23.5254
MSMEG_5782	-0.673152	3.28642	25.1334	25.1517	25.2956	24.469	24.49	24.6023
MSMEG_5789	2.53131	4.03529	27.4583	27.3497	27.1244	29.6025	30.0272	29.8966
MSMEG_5790	-0.801476	3.17199	30.1482	30.1428	30.3755	29.4885	29.3946	29.379
MSMEG_5792	-0.340394	0.678545	23.6792	23.6454	23.0427	23.2812	23.1159	22.9489
MSMEG_5795	1.50755	3.40115	22.8172	22.7342	22.7548	24.0952	24.192	24.5416
MSMEG_5796	-0.228787	0.376999	24.3661	24.4555	23.71	24.1418	23.8237	23.8798
MSMEG_5797	-2.61553	3.09944	25.0667	24.4456	24.3019	22.247	22.0354	21.6852
MSMEG_5824	-0.892307	3.03094	25.1242	25.1826	25.3457	24.2539	24.2423	24.4794
MSMEG_5828	0.716496	1.15994	24.2851	24.6962	23.749	24.9126	24.8228	25.1443
MSMEG_5829	0.676942	1.91559	21.5135	21.3342	21.8038	22.3594	22.2196	22.1034
MSMEG_5830	1.91024	4.05393	23.6387	23.2942	23.3949	25.3036	25.4742	25.2807
MSMEG_5831	-0.420765	1.63542	23.0839	22.9044	22.8213	22.4239	22.6924	22.431
MSMEG_5832	-1.60514	3.68154	26.9662	26.9246	27.1612	25.234	25.4194	25.583
MSMEG_5834	-0.669776	2.05874	24.8506	25.1186	24.6976	24.1324	24.1749	24.3502
MSMEG_5835	-0.398553	0.710698	19.9873	19.8663	20.5382	19.4494	19.7805	19.9662
MSMEG_5837	-1.63315	3.9405	28.4628	28.5095	28.8028	26.9434	27.0029	26.9293
MSMEG_5839	1.95888	2.78334	24.0731	23.7081	23.5225	25.4107	25.6648	26.1049
MSMEG_5841	1.39001	3.70138	24.7319	24.6966	24.4638	25.9059	26.1321	26.0243
MSMEG_5847	1.20657	2.04454	24.1124	23.8758	23.7973	24.7901	25.028	25.587
MSMEG_5852	0.984767	2.40593	25.8593	25.8223	25.4451	26.5042	26.7456	26.8312
MSMEG_5866	2.01312	2.64637	23.6194	23.5772	22.7388	25.4091	25.2874	25.2782
MSMEG_5871	0.763399	1.922	26.0726	26.2535	25.6964	26.7892	26.6592	26.8643
MSMEG_5873	-1.33909	2.98892	23.1779	23.5694	23.4799	22.0182	22.2674	21.9243
MSMEG_5878	-2.17202	3.1078	25.6465	25.5045	26.0093	23.5693	23.8532	23.2219
MSMEG_5884	-1.20787	2.59537	22.484	22.8909	22.8282	21.5837	21.7128	21.283
MSMEG_5885	-1.42127	3.3794	23.6969	23.6291	23.8015	22.2996	22.4927	22.0715
MSMEG_5890	-1.80061	2.56763	27.5483	27.4686	28.1427	25.9748	26.1817	25.6013
MSMEG_5892	0.507343	1.79912	20.8159	20.7755	20.7164	21.0398	21.452	21.338
MSMEG_5903	-0.843508	3.83114	24.1071	24.0683	24.2216	23.277	23.2292	23.3604
MSMEG_5904	-2.58257	4.09255	25.0987	24.9819	25.3286	22.7003	22.3158	22.6453
MSMEG_5907	-0.204598	0.270822	21.0638	21.9874	21.4462	21.0134	21.4306	21.4397
MSMEG_5912	-1.08292	3.11424	26.5302	26.4813	26.8304	25.4867	25.4885	25.6179
MSMEG_5914	0.156326	0.39872	20.9194	21.0337	21.4151	21.3072	21.3856	21.1443
MSMEG_5925	1.44101	2.74626	23.0198	22.6736	22.4499	23.9667	24.3213	24.1784
MSMEG_5927	-1.04498	2.89009	23.0989	23.129	23.5002	22.2206	22.1759	22.1968
MSMEG_5932	1.29861	1.8953	21.4514	21.813	21.9695	22.9914	22.6197	23.5186
MSMEG_5937	1.75708	3.94838	24.9185	25.0526	24.6767	26.7142	26.5866	26.6182
MSMEG_5939	-1.12272	3.30213	28.4945	28.7693	28.5045	27.5328	27.3443	27.5231
MSMEG_5940	0.772552	1.0551	26.4241	26.7238	25.587	27.0884	26.9171	27.0471
MSMEG_5941	-0.231592	0.543871	22.0759	22.0075	22.1974	21.6802	21.6842	22.2216
MSMEG_5943	-0.244919	0.427718	25.8983	26.2379	25.4697	25.8172	25.5851	25.469
MSMEG_5999	-0.0453434	0.0847086	23.7937	23.9428	23.623	24.0392	23.7174	23.4669
MSMEG_6008	0.542281	0.9603	25.7968	26.0608	25.2295	26.4356	26.1364	26.142
MSMEG_6020	-0.510674	1.23966	24.1976	24.1616	24.3378	23.531	23.5407	24.0933
MSMEG_6021	2.20662	2.71435	23.4072	23.3134	23.7275	25.4479	25.3768	26.2433
MSMEG_6024	1.1368	2.75661	23.4519	23.1758	23.4252	24.2895	24.4544	24.7193
MSMEG_6031	-0.360034	0.654538	23.6381	23.8589	23.2777	23.4986	23.313	22.883
MSMEG_6037	1.55081	2.26697	22.4693	22.1719	22.814	23.7755	23.8722	24.46
MSMEG_6038	1.21772	2.35021	22.1477	21.7026	22.2913	23.4116	23.3434	23.0398
MSMEG_6040	-0.779016	2.63485	21.5734	21.7574	21.5033	20.8269	20.9801	20.69
MSMEG_6043	-0.268099	0.365405	22.3916	22.2524	21.4176	21.6769	21.7971	21.7833
MSMEG_6074	0.534632	1.31921	24.3299	24.4498	24.3191	24.7502	24.6835	25.2691
MSMEG_6076	-1.85942	3.57796	25.2839	24.8537	25.3244	23.3063	23.3359	23.2415
MSMEG_6077	-1.42472	3.45418	26.4439	26.7579	26.5547	25.0803	25.3337	25.0683
MSMEG_6081	-1.51897	4.27282	23.091	22.93	22.9617	21.5574	21.5265	21.3419
MSMEG_6082	-0.184762	0.459152	24.9025	24.9161	25.1094	25.0745	24.7797	24.5195
MSMEG_6091	-0.330726	1.72505	26.544	26.4204	26.5828	26.0436	26.2742	26.2371
MSMEG_6094	0.830623	1.18739	22.8273	22.5348	22.9738	23.9891	23.8271	23.0115
MSMEG_6097	-1.32818	4.18013	24.0565	23.8847	24.0161	22.7514	22.6663	22.555
MSMEG_6098	-0.680707	2.19838	23.3636	23.3643	23.4682	22.9249	22.4927	22.7364
MSMEG_6101	-0.87834	1.36721	22.6359	22.8897	21.9221	21.7065	21.6558	21.4504
MSMEG_6105	-0.971379	1.92544	27.0665	27.1792	27.0552	25.9347	26.5645	25.8876
MSMEG_6114	2.00896	0.997227	25.3697	25.4026	22.6125	26.5148	26.7836	26.1134
MSMEG_6127	0.0173562	0.0338297	26.7494	27.1227	26.7475	26.9776	27.0415	26.6527
MSMEG_6129	-0.766451	1.48821	25.067	25.3716	24.5645	24.2901	24.1589	24.2547
MSMEG_6142	2.16805	3.42413	24.8848	25.2612	24.6013	27.1533	27.0881	27.0101
MSMEG_6157	-0.995764	2.92996	25.3772	25.6298	25.6438	24.4232	24.5296	24.7107
MSMEG_6159	-0.298199	0.430232	29.2349	29.6372	29.6502	29.5665	29.3654	28.6957
MSMEG_6179	1.67983	2.35665	26.0999	25.9442	26.2063	27.3632	27.6253	28.3015
MSMEG_6183	-0.615796	1.86859	23.0981	22.6214	22.9074	22.1686	22.3209	22.29
MSMEG_6189	-0.956949	3.61227	26.6942	26.5859	26.7554	25.6393	25.6888	25.8366
MSMEG_6190	-0.460048	1.53617	22.1396	22.5487	22.1744	21.8479	21.7432	21.8914
MSMEG_6191	0.779366	0.670783	22.4082	23.0325	21.8429	23.6065	23.6078	22.4074
MSMEG_6192	1.28528	1.86239	23.3835	24.1023	23.3106	25.1629	24.9224	24.567
MSMEG_6193	-1.55027	2.60674	23.7643	23.8742	23.1711	21.9339	22.1697	22.0551
MSMEG_6212	-1.06207	2.88567	24.3303	24.3568	24.404	23.4875	23.3671	23.0503
MSMEG_6213	1.78151	3.29012	22.2334	22.309	21.9875	24.2435	23.777	23.854
MSMEG_6227	-1.38703	3.75526	23.779	23.8892	23.9509	22.6552	22.4537	22.3491
MSMEG_6229	0.424809	1.17053	22.7604	22.5532	23.1313	23.2816	23.2032	23.2344
MSMEG_6232	3.80506	4.47545	20.9825	20.7645	21.1855	24.5223	24.8219	25.0035
MSMEG_6235	1.59433	1.57158	22.8403	24.0564	22.6999	25.1216	24.7523	24.5057
MSMEG_6241	-0.926859	0.951436	23.7291	23.8417	24.0279	23.8124	22.6739	22.3319
MSMEG_6242	2.20205	2.64592	29.7334	29.6232	30.1534	32.5753	31.6835	31.8574
MSMEG_6248	1.1431	2.65017	21.6937	22.0344	21.5966	22.7911	22.8551	23.1077
MSMEG_6256	-0.115969	0.587976	27.2872	27.4284	27.2941	27.3126	27.2775	27.0717
MSMEG_6257	-0.311083	0.806933	24.5386	24.7705	24.5508	24.042	24.6002	24.2845
MSMEG_6265	-1.05323	1.75819	21.3401	21.2597	22.1017	20.5478	20.5331	20.4608
MSMEG_6271	1.51521	2.20473	24.0527	23.8462	23.1082	25.2355	25.1498	25.1674
MSMEG_6280	-3.23487	2.04477	26.3663	25.7333	26.7787	23.8392	21.8544	23.48
MSMEG_6282	-0.858513	1.79032	25.4831	25.5556	25.8136	24.4217	24.7754	25.0796
MSMEG_6283	-1.45299	2.67761	22.1625	22.4486	22.8649	21.0051	21.0834	21.0285
MSMEG_6284	-0.556795	1.33647	23.9339	23.7415	24.2739	23.2075	23.4625	23.609
MSMEG_6285	-1.07965	3.21052	23.4521	23.5144	23.71	22.4609	22.353	22.6236
MSMEG_6286	1.56327	3.67441	25.0032	24.9859	25.0453	26.5531	26.3779	26.7933
MSMEG_6289	-1.50865	2.79373	24.2666	24.6521	24.9266	23.0065	23.1283	23.1846
MSMEG_6305	-1.37482	2.13709	24.4629	24.2461	23.6757	22.5837	23.0293	22.6472
MSMEG_6309	-1.09446	2.62855	22.3809	22.202	22.6036	21.4011	21.4189	21.0832
MSMEG_6319	-1.66131	3.70769	22.2662	22.0842	22.4	20.7613	20.4742	20.5311
MSMEG_6320	-2.83216	4.38041	23.897	23.4551	23.7746	20.8341	21.0008	20.7954
MSMEG_6328	0.0399971	0.127434	23.3742	22.9863	23.132	23.1632	23.216	23.2332
MSMEG_6337	-0.015173	0.0294927	23.4566	23.2905	23.7719	23.3129	23.6591	23.5017
MSMEG_6353	0.901659	1.72708	25.3628	25.5866	24.797	26.148	26.1885	26.1148
MSMEG_6363	2.31114	3.10591	21.8132	22.077	21.7738	23.7329	24.4185	24.4459
MSMEG_6365	-1.4605	4.1312	28.6426	28.8365	28.5715	27.2127	27.2901	27.1663
MSMEG_6373	1.15436	2.22392	22.3356	22.0224	21.7726	23.4768	23.112	23.0049
MSMEG_6384	1.27648	2.51101	28.4218	28.2354	27.8301	29.6178	29.2839	29.415
MSMEG_6391	2.04943	2.37786	25.3415	25.2017	26.2738	27.6491	27.4994	27.8168
MSMEG_6392	-1.00911	3.21073	25.2463	25.4081	25.1719	24.2654	24.3988	24.1347
MSMEG_6393	-1.00129	3.07048	26.9944	27.2093	27.3542	26.2602	26.1621	26.1318
MSMEG_6396	0.266798	0.478006	20.7934	21.3726	20.8615	21.2319	21.0251	21.5708
MSMEG_6398	0.270232	0.501822	27.8805	28.1589	27.5042	28.3339	27.8575	28.1629
MSMEG_6404	1.43256	2.50557	24.8774	24.807	25.1379	26.1153	26.2348	26.7699
MSMEG_6407	-2.40469	3.06058	24.033	23.8133	24.571	21.9674	21.7757	21.4601
MSMEG_6410	1.88693	3.38601	24.1	23.7348	24.012	25.7069	25.6951	26.1056
MSMEG_6412	-0.455875	1.5406	24.6311	24.8943	24.741	24.1924	24.5257	24.1807
MSMEG_6413	0.908475	1.70286	23.826	23.8068	24.0898	24.9131	24.3889	25.146
MSMEG_6422	1.02206	1.90944	24.4648	24.6667	24.5951	25.2242	26.012	25.5566
MSMEG_6425	-1.20922	3.61274	26.4342	26.3488	26.4543	25.3855	25.0896	25.1345
MSMEG_6427	3.07498	4.71874	26.2478	26.0401	25.9517	28.9629	29.265	29.2366
MSMEG_6431	-0.345076	1.12717	28.5114	28.542	28.16	28.1652	27.9131	28.0998
MSMEG_6434	-0.771458	2.13038	23.672	23.7678	24.0988	22.9093	23.1739	23.1411
MSMEG_6439	-1.1378	3.06759	26.7375	26.8848	27.0514	25.7539	25.5995	25.9069
MSMEG_6452	-0.495316	1.55416	27.4874	27.6535	27.3629	27.1012	26.7671	27.1495
MSMEG_6458	1.22214	2.84164	23.0781	23.0313	23.3543	24.6066	24.3172	24.2064
MSMEG_6467	-0.749575	1.75161	27.1754	27.1997	27.0934	26.7867	26.2119	26.2211
MSMEG_6469	-0.624869	2.8153	20.8987	20.6859	20.8791	20.2849	20.1581	20.1461
MSMEG_6471	-0.751029	1.04042	21.6223	20.9815	22.0573	20.7456	20.6085	21.0538
MSMEG_6477	3.28951	3.41303	20.8857	21.4209	20.4346	24.3224	24.2586	24.0288
MSMEG_6483	-1.09822	1.56329	21.932	22.2941	22.7615	21.6593	20.9627	21.071
MSMEG_6485	-1.40429	1.92115	23.0106	23.6186	23.4329	21.9593	21.4835	22.4064
MSMEG_6502	-1.52831	3.36558	25.9318	26.103	26.4188	24.615	24.6332	24.6204
MSMEG_6506	-0.92729	3.27038	23.0625	23.114	23.0416	22.0068	22.1178	22.3116
MSMEG_6507	1.88186	2.80813	24.4883	24.2352	24.2386	25.9187	26.0295	26.6595
MSMEG_6511	0.649101	1.2125	24.0139	24.1703	24.4069	24.9835	25.147	24.4079
MSMEG_6512	0.634068	1.51335	24.9031	25.2204	25.4089	25.789	26.0391	25.6066
MSMEG_6514	-0.488359	1.55097	24.5522	24.6541	24.5368	24.2468	24.2186	23.8125
MSMEG_6518	-1.87844	4.11237	30.6747	30.6896	30.7165	28.9108	28.9438	28.591
MSMEG_6520	-0.386257	0.750818	26.0245	26.666	25.9081	25.8459	25.8097	25.7843
MSMEG_6521	-1.84329	3.06438	23.2664	22.9242	23.3388	21.4288	21.5525	21.0182
MSMEG_6524	-0.588486	1.58881	24.3585	24.2919	24.4308	23.7779	23.4828	24.055
MSMEG_6560	0.229684	0.405556	21.6703	22.0312	21.5042	22.2938	21.9393	21.6615
MSMEG_6565	-0.097868	0.277814	24.2651	24.0545	24.4748	24.2109	24.2655	24.0245
MSMEG_6579	-1.22783	1.8386	27.3569	27.2143	27.227	26.2755	26.3852	25.454
MSMEG_6584	0.458277	3.78348	24.1451	24.2271	24.2052	24.6364	24.6954	24.6204
MSMEG_6595	-0.373371	1.75699	23.6372	23.4823	23.6577	23.1531	23.1296	23.3745
MSMEG_6596	-0.038414	0.0561384	22.6079	22.6865	22.8151	22.8059	22.9705	22.2179
MSMEG_6605	-0.981695	2.14866	20.4271	20.695	20.5681	19.8244	19.6842	19.2365
MSMEG_6616	-0.6022	1.27719	21.2549	21.0771	20.9178	20.293	20.878	20.2722
MSMEG_6630	0.144725	0.180459	24.8988	24.966	24.0492	24.9358	24.7295	24.6829
MSMEG_6636	2.70191	2.06289	24.7464	24.0434	25.9156	27.4441	27.8768	27.4902
MSMEG_6638	-0.945486	1.89733	26.0134	26.2501	26.7262	25.2605	25.4896	25.4032
MSMEG_6662	-1.0551	1.55819	23.0753	22.8426	23.3012	21.7016	22.5808	21.7713
MSMEG_6663	0.258499	0.717879	22.3163	22.1804	22.4184	22.4937	22.8502	22.3467
MSMEG_6685	1.07509	1.8989	21.1984	20.9563	21.5247	22.2095	22.6632	22.0321
MSMEG_6730	0.613746	1.35826	22.703	22.1652	22.7932	23.3244	23.0838	23.0945
MSMEG_6733	1.72951	3.45014	21.6693	21.9356	22.198	23.6308	23.6903	23.6703
MSMEG_6740	2.41849	4.46827	22.1147	22.1494	21.7999	24.3578	24.478	24.4837
MSMEG_6746	1.70306	3.22374	24.3219	23.8306	24.2994	25.9333	25.7237	25.9041
MSMEG_6752	-1.57423	3.70927	26.1881	26.2669	26.5138	24.8184	24.8173	24.6103
MSMEG_6754	1.12011	2.57021	25.1156	25.3466	24.7964	26.1287	26.1754	26.3149
MSMEG_6772	1.82218	2.74195	24.1984	23.3799	23.7333	25.5549	25.493	25.7303
MSMEG_6783	2.25606	3.72634	24.4345	24.4558	24.3233	26.7042	26.3549	26.9225
MSMEG_6784	0.48015	1.11123	21.148	21.0775	20.6457	21.2624	21.3604	21.6889
MSMEG_6787	-0.318098	1.39537	24.9704	25.2003	24.8753	24.7094	24.6146	24.7676
MSMEG_6791	1.19196	1.21465	21.6002	21.6327	22.1139	22.8814	22.2799	23.7613
MSMEG_6802	-1.47277	2.31099	22.5661	22.2136	22.872	20.8109	21.0036	21.4188
MSMEG_6804	-1.11725	2.2869	26.4908	26.2196	26.6645	25.2845	25.1066	25.632
MSMEG_6822	-1.45691	3.7841	25.8094	26.1012	26.0901	24.6208	24.5503	24.4589
MSMEG_6874	1.35879	2.70305	20.4666	20.1924	20.478	21.5957	21.5523	22.0654
MSMEG_6892	-0.763667	2.62217	21.1213	20.8949	20.9426	20.1058	20.1674	20.3946
MSMEG_6894	-1.33508	4.77283	28.1253	28.0598	28.2017	26.8545	26.7984	26.7287
MSMEG_6895	-1.63274	3.10658	26.8591	26.7491	27.04	24.9911	25.2274	25.5314
MSMEG_6896	-0.115761	0.253537	28.2513	28.5274	28.1423	28.2031	27.9423	28.4284
MSMEG_6897	-0.144272	0.402143	28.6021	28.9603	28.4808	28.4526	28.6214	28.5364
MSMEG_6904	1.48176	2.59538	27.8077	28.098	27.4011	29.4191	29.2066	29.1265
MSMEG_6906	-0.536484	1.41629	21.0167	21.4018	21.3461	20.7435	20.9285	20.4833
MSMEG_6907	1.57942	2.9586	24.4569	24.0115	24.539	25.9463	25.7421	26.0573
MSMEG_6913	-1.96265	3.05285	24.9816	24.7769	25.2336	22.9732	22.7636	23.3673
MSMEG_6917	0.944838	1.48464	25.3695	25.1292	25.2402	25.795	26.0305	26.7479
MSMEG_6933	0.4484	1.14534	26.5789	26.6761	26.099	26.9714	26.8153	26.9125
MSMEG_6934	-1.309	3.22263	28.1819	27.988	28.2558	26.8715	26.995	26.6323
MSMEG_6938	-1.98662	4.08756	26.7119	26.684	27.0447	24.8035	24.7789	24.8984
MSMEG_6939	-1.61902	2.28198	22.4503	21.8693	22.8645	20.8058	20.8412	20.68
MSMEG_6941	-0.0695928	0.0886309	26.8947	27.3289	26.4044	26.9162	26.8552	26.6479

## Sheet: Str 7.5hr
			Drug-free control replicates				Drug-treated replicates					Proteins exclusively absent in drug-treated samples	Proteins exclusively present in drug-treated samples
Negative log10 p value	log2 Fold Difference(drug/drug free control)	Majority protein IDs	LFQ intensity 1	LFQ intensity 2	LFQ intensity 3	LFQ intensity 4	LFQ intensity 5	LFQ intensity 6	LFQ intensity 7	LFQ intensity 8		MSMEG_0134	MSMEG_0129
0.0102445	0.00650883	MSMEG_0001|dnaN|DNA	27.13	27.3179	26.7713	27.6444	27.2185	27.4819	26.9384	27.2507		MSMEG_1832	MSMEG_0557
0.316989	0.522616	MSMEG_0002|MSMEG_0002|6-phosphogluconate	25.0469	25.3325	25.4602	27.5494	26.5019	27.4343	25.8644	25.6789		MSMEG_4249	MSMEG_0792
0.421067	0.173275	MSMEG_0005|gyrB|DNA	24.9077	24.7587	25.0089	24.3004	24.7542	24.7592	25.0385	25.1168			MSMEG_6243
0.172025	-0.119262	MSMEG_0006|gyrA|DNA	26.0584	26.0066	26.0332	25.0902	25.6538	25.3446	25.7456	25.9673
0.142303	-0.198431	MSMEG_0007|MSMEG_0007|conserved	22.8586	22.7005	23.3215	21.3044	21.9011	21.7527	22.8684	22.8692
0.617173	-0.401546	MSMEG_0020|MSMEG_0020|Periplasmic	24.2585	23.8775	23.2831	24.1846	23.6252	23.5993	22.8846	23.8883
0.103878	-0.10827	MSMEG_0023|MSMEG_0023|conserved	25.3114	24.6454	24.3461	23.7395	24.7166	23.8941	24.2655	24.7332
0.042306	-0.0251145	MSMEG_0024|MSMEG_0024|peptidyl-prolyl	32.0839	31.6537	32.1788	31.5277	31.7549	31.5826	32.2037	31.8024
0.306673	0.241868	MSMEG_0028|MSMEG_0028|serine-threonine	23.2778	22.6442	23.5365	22.1999	23.176	22.7711	23.3789	23.2999
0.034207	-0.0199857	MSMEG_0033|MSMEG_0033|protein	23.2118	23.4575	23.2989	22.6091	23.359	23.0754	23.0319	23.0311
0.12361	-0.135721	MSMEG_0035|MSMEG_0035|FHA	28.7407	28.785	28.5171	27.1742	28.3382	27.7125	28.2752	28.3481
0.345469	-0.148056	MSMEG_0042|MSMEG_0042|TetR-family	22.5384	22.3196	22.3559	21.7041	22.087	22.0131	22.0717	22.154
0.24336	-0.0617437	MSMEG_0048|MSMEG_0048|pyridoxamine	23.1983	22.9927	22.8548	22.9991	23.0451	22.845	23.1079	22.8
0.518048	0.142267	MSMEG_0050|MSMEG_0050|conserved	20.3967	20.5913	20.7569	20.7069	20.7752	20.8637	20.4736	20.9083
1.14314	-0.654716	MSMEG_0052|MSMEG_0052|conserved	23.4151	23.1334	22.9258	22.1634	22.1429	21.9351	22.3975	22.5432
0.154038	-0.246055	MSMEG_0058|MSMEG_0058|conserved	26.679	25.9	26.2093	24.2091	25.7242	24.7058	25.5027	26.0804
0.395809	-0.662378	MSMEG_0063|MSMEG_0063|PE	24.1991	23.149	23.6686	21.0693	22.7539	21.586	22.4547	22.6419
0.400739	-0.714931	MSMEG_0065|MSMEG_0065|conserved	30.6604	29.5447	30.261	27.5445	28.9399	27.7394	29.4763	28.9953
0.414442	-0.660283	MSMEG_0066|MSMEG_0066|early	29.5059	28.24	29.1018	26.6491	27.8755	26.8604	28.3473	27.7724
0.183462	-0.274065	MSMEG_0067|MSMEG_0067|conserved	26.3319	25.625	26.1498	24.0853	25.4023	24.4497	25.7506	25.493
0.140299	-0.273539	MSMEG_0069|MSMEG_0069|translation	26.5859	25.9197	26.8834	23.8993	25.4758	24.7345	26.1833	25.8006
0.765412	-0.246713	MSMEG_0070|MSMEG_0070|hypothetical	22.2547	21.8656	21.9271	21.7267	21.7876	21.3758	21.7249	21.899
0.117897	-0.143859	MSMEG_0071|MSMEG_0071|conserved	26.2324	25.8263	26.1577	24.5097	25.437	24.9722	25.8967	25.8447
0.13972	0.114369	MSMEG_0076|MSMEG_0076|antigen	26.8492	26.2134	27.0523	25.8991	26.5997	26.2336	26.9842	26.6539
0.0901195	-0.199375	MSMEG_0077|MSMEG_0077|hypothetical	25.658	25.4222	25.9164	23.0148	24.7237	23.5766	25.5453	25.3684
0.0735425	-0.0998955	MSMEG_0078|MSMEG_0078|hypothetical	23.9082	23.3886	23.5865	21.8826	23.2731	22.529	23.3035	23.2607
0.00772434	-0.0060792	MSMEG_0080|MSMEG_0080|conserved	23.0231	22.9956	22.8845	21.9498	22.7799	22.5178	22.773	22.758
0.306381	0.227737	MSMEG_0081|MSMEG_0081|conserved	25.9942	25.4125	25.9932	24.7464	25.7735	25.493	25.9577	25.8331
0.557203	-0.770747	MSMEG_0084|MSMEG_0084|phosphocarrier	29.8294	29.1081	29.8171	27.5878	28.1739	28.1328	29.3581	27.5946
0.636438	-0.815412	MSMEG_0086|MSMEG_0086|1-phosphofructokinase|327	22.9328	22.8992	23.754	21.0794	21.9843	21.5506	22.4555	21.4133
0.439761	-0.751714	MSMEG_0087|MSMEG_0087|glucitol	24.4679	24.1434	24.9724	21.9576	23.388	22.8096	24.0438	22.2931
0.506294	-0.781311	MSMEG_0088|ptsI|phosphoenolpyruvate-protein	25.6559	25.362	26.253	23.4649	24.3555	23.8098	25.4621	23.9832
0.825641	-0.238109	MSMEG_0091|MSMEG_0091|putative	21.5877	21.5078	21.6015	21.0723	21.3041	20.993	21.276	21.2438
0.466642	0.162348	MSMEG_0093|MSMEG_0093|methyltransferase|320	22.8324	22.9574	22.656	22.591	22.7502	23.1607	22.6386	23.1366
0.356629	0.12132	MSMEG_0095|MSMEG_0095|methyltransferase|311	24.8961	24.7798	24.8316	25.0438	24.7593	25.3927	24.9251	24.9595
1.79933	-1.24165	MSMEG_0096|MSMEG_0096|peroxisomal	24.7188	24.2792	24.4102	23.2653	23.0132	22.4206	22.8806	23.3923
1.10675	-0.362654	MSMEG_0097|MSMEG_0097|oxidoreductase,	22.6984	23.1242	22.4849	22.6326	22.5867	22.3485	22.4511	22.1033
0.311619	-0.345846	MSMEG_0100|MSMEG_0100|phosphotyrosine	25.7682	25.4558	25.3016	23.8412	24.9129	24.2113	24.7698	25.0894
0.24312	0.0648422	MSMEG_0102|MSMEG_0102|putative	23.5189	23.5957	23.6664	23.4895	23.9036	23.4243	23.6393	23.5627
0.111521	-0.0921483	MSMEG_0108|MSMEG_0108|acyl-CoA	25.4625	25.6803	25.0547	26.3659	25.7867	25.7656	25.2359	25.4066
0.00858779	0.0102415	MSMEG_0110|pntA|NAD(P);MSMEG_4109|pntA|NAD(P)	24.3649	24.1054	24.3936	22.9061	24.0208	23.3973	24.1305	24.2624
0.402134	-0.299728	MSMEG_0114|MSMEG_0114|extracellular	24.4485	24.2662	24.7298	23.3408	23.7479	23.6552	24.25	23.9333
0.122658	-0.0505433	MSMEG_0127|MSMEG_0127|oxidoreductase,	26.342	26.7601	26.2961	26.4214	26.3569	26.7326	26.3031	26.225
0.0361777	0.0177217	MSMEG_0131|MSMEG_0131|AMP-binding	25.1329	25.3941	25.1693	25.6924	25.6522	25.3575	25.1164	25.3335
0.0249293	0.0149984	MSMEG_0146|MSMEG_0146|mosc	25.9376	25.9172	25.9535	25.1438	25.808	25.5922	25.8313	25.7806
1.75489	-0.78409	MSMEG_0158|MSMEG_0158|formyl-coenzyme	24.6829	25.0161	24.569	25.5108	24.2391	24.3834	24.1893	23.8306
0.17137	0.159634	MSMEG_0166|MSMEG_0166|GntR-family	24.4584	23.7341	24.6583	23.1571	23.9946	23.9564	24.3708	24.3247
0.0948295	-0.0690908	MSMEG_0179|MSMEG_0179|transcriptional	22.5017	22.1397	21.9473	21.378	21.5874	21.989	21.922	22.1919
0.24079	0.162793	MSMEG_0187|MSMEG_0187|acetyltransferase|158	24.1611	24.4543	23.8758	24.5633	24.49	24.918	23.8207	24.4769
0.00656794	0.0113792	MSMEG_0194|MSMEG_0194|serine	29.1291	28.5272	28.3635	26.771	28.389	27.4647	28.1333	28.8492
0.429533	-0.219307	MSMEG_0212|MSMEG_0212|lyase|139	25.4113	25.4006	24.8751	24.541	24.9359	24.9126	24.598	24.9043
0.169467	0.113933	MSMEG_0215|MSMEG_0215|YhhW	24.1273	24.8336	24.3866	25.0525	24.7117	25.0627	24.3136	24.7677
0.383605	0.213079	MSMEG_0216|MSMEG_0216|3-hydroxyacyl-CoA	29.0076	29.0134	29.3358	29.7522	29.3771	29.9452	29.4876	29.1514
1.43318	-0.207217	MSMEG_0221|MSMEG_0221|secreted	22.2767	22.3372	22.0795	22.1566	22.1088	22.0521	21.8691	21.9912
1.07206	0.274818	MSMEG_0224|MSMEG_0224|O-methyltransferase	24.6734	24.9383	24.7785	24.969	25.3867	25.1988	25.0088	24.8641
0.0434797	0.0607729	MSMEG_0229|ilvD|dihydroxy-acid	28.1205	28.5072	27.9238	29.8904	28.7001	29.1089	28.136	28.74
0.367528	-0.097363	MSMEG_0233|MSMEG_0233|lipoprotein	28.3182	28.4085	28.1626	27.9378	28.0658	28.1813	27.9872	28.2034
0.103461	0.111147	MSMEG_0234|MSMEG_0234|metallopeptidase|666	27.4946	27.9994	27.3784	28.9563	28.154	28.4741	27.6931	27.9522
0.155459	0.0699406	MSMEG_0238|MSMEG_0238|O-acetylhomoserine/O-acetylserine	24.5096	24.3826	24.0701	24.8761	24.5483	24.6434	24.4868	24.4396
0.000577426	0.000818729	MSMEG_0239|MSMEG_0239|O-acetylhomoserine/O-acetylserine	25.8975	26.392	25.5105	27.4316	26.3952	26.8347	25.7534	26.2515
0.310679	-0.673233	MSMEG_0242|MSMEG_0242|conserved	26.2136	25.7232	26.5796	23.0275	24.379	23.7137	25.7211	25.0372
0.138268	-0.29158	MSMEG_0243|MSMEG_0243|conserved	32.3033	31.6733	32.3654	29.4193	31.057	30.0678	31.8698	31.6004
0.0798586	-0.149201	MSMEG_0250|MSMEG_0250|membrane	26.0577	25.3868	26.0605	23.6571	25.0165	24.1618	25.6962	25.6909
0.96722	-0.25286	MSMEG_0251|MSMEG_0251|conserved	25.3926	25.2984	25.2592	24.8681	24.8043	25.0364	24.8738	25.0923
0.0166839	0.0119252	MSMEG_0252|trmB|tRNA	24.7247	24.3576	24.8469	23.9072	24.3543	24.1996	24.6158	24.7144
0.121153	-0.112723	MSMEG_0255|MSMEG_0255|phosphoenolpyruvate	30.1145	30.3801	29.8008	31.2316	30.212	30.7147	29.9345	30.2148
0.289067	-0.255016	MSMEG_0282|MSMEG_0282|conserved	26.1647	26.385	25.6642	24.8146	25.5748	25.3434	25.2889	25.8015
0.224811	-0.153563	MSMEG_0284|MSMEG_0284|ribosyldihydronicotinamide	23.0067	22.7976	22.3952	23.593	22.4942	23.0478	22.8117	22.8245
0.0710273	-0.0635896	MSMEG_0301|MSMEG_0301|oxidoreductase,	23.5507	23.9398	23.3677	24.4063	23.6723	24.2987	23.2181	23.821
0.204961	-0.167788	MSMEG_0309|MSMEG_0309|aldehyde	23.4262	23.043	23.154	22.041	22.9105	22.4353	22.9474	22.6998
0.876488	-0.311817	MSMEG_0312|eda|2-dehydro-3-deoxyphosphogluconate	25.22	25.3448	25.2689	24.7238	25.036	24.7031	24.9925	24.5786
1.19409	-0.513946	MSMEG_0313|edd|phosphogluconate	23.8896	24.4025	24.423	24.3312	23.8163	23.3313	24.2291	23.6138
0.423178	-0.197569	MSMEG_0314|zwf|glucose-6-phosphate	24.4296	24.8832	24.7237	24.2578	24.681	24.0508	24.5837	24.1886
0.0231781	-0.0134478	MSMEG_0317|MSMEG_0317|conserved	24.6624	24.4411	24.8191	23.9781	24.5344	24.2682	24.4265	24.6179
0.41273	-0.372188	MSMEG_0356|MSMEG_0356|acetyltransferase|98	26.6629	26.6256	26.7492	25.1627	25.9138	25.601	26.1674	26.0294
0.48997	-0.308268	MSMEG_0361|MSMEG_0361|Glycosyl	28.3578	28.0351	28.0234	27.0985	27.4348	27.3874	27.7227	27.7369
0.00140038	0.00217915	MSMEG_0365|MSMEG_0365|conserved	25.2779	24.6625	25.0544	23.3061	24.7454	23.792	24.7372	25.0349
0.0765753	0.0622926	MSMEG_0366|MSMEG_0366|hypothetical	25.8791	25.2394	25.3316	24.6707	25.4554	24.9812	25.2246	25.7089
0.151644	-0.0565057	MSMEG_0369|MSMEG_0369|hypothetical	23.5732	23.3889	23.3846	23.5927	23.307	23.4364	23.1821	23.7879
0.345071	-0.451416	MSMEG_0371|MSMEG_0371|MaoC	23.7031	23.8918	24.4785	22.1981	22.8448	22.5254	23.825	23.2707
0.195701	-0.19837	MSMEG_0372|MSMEG_0372|oxidoreductase,	27.0748	27.1056	27.628	25.9141	26.4617	26.531	27.2128	26.7235
0.347469	-0.1934	MSMEG_0373|MSMEG_0373|3-ketoacyl-CoA	24.9572	24.736	25.3498	24.3256	24.5479	24.5796	24.9651	24.5024
0.227432	0.113382	MSMEG_0380|MSMEG_0380|MmpS4	24.5023	24.3067	24.5234	23.8326	24.4426	24.091	24.4088	24.6762
0.135894	0.166934	MSMEG_0386|MSMEG_0386|NAD	25.0017	25.371	24.6584	26.6835	25.5726	25.9786	25.3224	25.5088
0.0586567	-0.0256042	MSMEG_0388|tylF|Macrocin-O-methyltransferase|240	23.8937	24.0297	23.7259	23.977	24.1376	23.8156	23.5167	24.054
2.71863	0.694564	MSMEG_0394|MSMEG_0394|hypothetical	24.5659	24.3801	24.336	24.0243	25.1284	25.0808	24.8171	25.0583
0.473831	-0.187672	MSMEG_0399|MSMEG_0399|conserved	26.2705	26.3601	26.0261	26.0153	25.9201	25.6742	25.9075	26.4194
0.699971	-0.490419	MSMEG_0400|MSMEG_0400|peptide	25.1091	25.2842	24.9931	24.2633	24.7325	23.7169	24.8568	24.3817
0.985743	-0.758615	MSMEG_0401|MSMEG_0401|putative	24.4898	24.5334	24.3587	23.2795	23.9728	22.7442	23.609	23.301
0.97768	-0.567683	MSMEG_0402|MSMEG_0402|linear	24.3962	24.1815	24.3449	23.2358	23.5702	23.1543	23.7286	23.4345
0.151679	-0.0997233	MSMEG_0404|MSMEG_0404|sigma	23.1128	23.1554	23.0019	23.9356	23.2747	23.5391	22.9437	23.0493
0.0937522	-0.0717344	MSMEG_0406|MSMEG_0406|acyl-coA-dehydrogenase|611	29.2985	29.6957	28.9829	30.085	29.6635	29.7077	29.1205	29.2836
0.397254	-0.5493	MSMEG_0412|MSMEG_0412|conserved	25.0683	24.5643	25.0457	22.7327	23.5205	23.2355	24.214	24.2437
0.401561	0.07514	MSMEG_0415|MSMEG_0415|NADH-fmn	24.7631	24.8871	24.5554	24.5996	24.7408	24.7954	24.7154	24.8542
0.310133	0.339907	MSMEG_0422|MSMEG_0422|transferase|255	25.0618	24.6034	24.8581	26.1858	25.5033	26.2149	25.6104	24.7402
0.0549181	0.0823145	MSMEG_0423|MSMEG_0423|conserved	23.4619	22.6421	22.4368	21.175	22.8329	21.815	22.6702	22.7269
0.229244	-0.205933	MSMEG_0435|MSMEG_0435|allophanate	23.9533	24.2158	23.9706	22.6341	23.4103	23.5837	23.3889	23.5672
1.30417	-0.370864	MSMEG_0441|MSMEG_0441|conserved	25.2934	24.9294	24.8905	24.7057	24.4098	24.6415	24.4801	24.8042
0.301619	-0.238461	MSMEG_0445|MSMEG_0445|amidohydrolase	24.9162	25.3232	24.9069	26.1339	24.9578	25.5298	24.7523	25.0864
0.457355	-0.295213	MSMEG_0447|MSMEG_0447|conserved	25.7783	25.453	25.4502	24.633	24.9447	24.6712	25.0914	25.4263
0.0168237	0.0375137	MSMEG_0451|MSMEG_0451|oxidoreductase,	29.4482	29.0585	29.6227	26.6557	28.7977	27.9805	29.4778	28.6791
0.4477	-0.436702	MSMEG_0456|MSMEG_0456|DNA	23.5997	23.4821	23.3056	21.969	22.5344	22.153	22.7102	23.2119
0.582391	-0.432392	MSMEG_0457|MSMEG_0457|DNA	22.5954	22.7463	22.6555	21.5579	21.8665	21.6142	21.7782	22.5666
0.0616275	-0.0341268	MSMEG_0464|MSMEG_0464|phosphomethylpyrimidine	27.0123	26.9739	26.757	26.1721	26.6786	26.7089	26.7693	26.6221
0.103502	-0.0962501	MSMEG_0472|MSMEG_0472|putative	23.3809	23.0383	23.6343	22.8116	23.3757	22.4038	22.9482	23.7525
0.792103	-0.386531	MSMEG_0965|MSMEG_0965|porin|211;MSMEG_5483|MSMEG_5483|porin|215;MSMEG_0520|MSMEG_0520|porin|215;MSMEG_6057|MSMEG_6057|MspD	26.9999	27.2717	26.8293	26.9837	26.3012	27.295	26.4924	26.4499
0.0490026	0.0490394	MSMEG_0531|MSMEG_0531|putative	25.9514	26.3118	25.7004	27.194	26.5787	26.5353	26.1514	26.0884
0.0759067	-0.0467782	MSMEG_0532|MSMEG_0532|transcriptional	22.8819	22.8504	23.0461	22.3569	22.515	22.4745	22.7704	23.1883
0.022775	-0.0377741	MSMEG_0536|MSMEG_0536|intracellular	29.0646	28.7877	29.1185	26.8351	28.3338	28.2751	28.8701	28.1757
0.0400776	-0.0266161	MSMEG_0539|MSMEG_0539|transcriptional	23.5219	23.743	23.8778	22.9081	23.5359	23.2663	23.4701	23.6722
0.124411	-0.0502267	MSMEG_0550|MSMEG_0550|sulfonate	28.1814	27.9347	27.8706	27.5821	27.8728	27.7307	27.6881	28.0764
0.0364418	-0.0175238	MSMEG_0551|MSMEG_0551|ABC	23.2048	23.3061	23.3108	23.1615	23.5551	23.3019	22.7802	23.2758
0.172962	-0.203948	MSMEG_0559|MSMEG_0559|conserved	30.2738	30.1868	31.2253	29.9362	29.728	30.2772	31.1901	29.6111
0.796658	-0.592532	MSMEG_0593|MSMEG_0593|conserved	24.2966	24.2861	23.9908	22.9329	23.4018	22.767	23.3659	23.6016
0.222258	0.185973	MSMEG_0600|MSMEG_0600|dehydrogenase|260	24.0576	24.1367	24.061	24.8186	24.5507	25.2083	23.9804	24.0785
0.51361	0.244991	MSMEG_0628|MSMEG_0628|amidohydrolase	23.3797	23.2758	23.2646	24.0831	23.5991	24.031	23.6319	23.7211
0.380057	0.0941215	MSMEG_0636|MSMEG_0636|conserved	26.3756	26.4597	26.4228	26.4677	26.3637	26.6842	26.3233	26.7312
0.0409248	-0.0458789	MSMEG_0637|MSMEG_0637|iron-sulfur	23.924	23.6546	23.6208	22.3135	23.5203	23.3129	23.5671	22.9291
0.099347	-0.109963	MSMEG_0639|MSMEG_0639|oligopeptide	24.9865	24.3934	24.8531	23.4305	24.4229	23.7115	24.6052	24.4841
0.36633	-0.153994	MSMEG_0640|MSMEG_0640|oligopeptide	25.6256	25.3842	25.3549	24.8617	25.3452	24.971	25.0476	25.2467
0.173529	-0.112802	MSMEG_0643|MSMEG_0643|extracellular	27.3199	27.1408	27.3277	26.509	27.315	26.5646	26.8559	27.1107
0.0308358	-0.0398731	MSMEG_0645|MSMEG_0645|putative	24.8706	25.037	24.7175	26.1777	25.0988	26.0132	24.8194	24.7119
0.240345	-0.157525	MSMEG_0670|MSMEG_0670|FAD	23.6909	24.2686	24.076	23.8078	23.7513	24.4632	23.6001	23.3986
0.130821	-0.0621171	MSMEG_0678|dcd|deoxycytidine	24.337	24.01	23.7417	23.6118	23.8036	24.0771	23.7054	23.866
0.381104	0.136984	MSMEG_0682|MSMEG_0682|conserved	22.2389	22.3448	22.3283	21.7556	22.3825	22.0883	22.3922	22.3526
0.271268	-0.0796375	MSMEG_0683|MSMEG_0683|conserved	26.5288	26.1259	26.3295	26.0655	26.1815	26.0722	26.3501	26.1272
0.135584	-0.0710711	MSMEG_0685|MSMEG_0685|oxidoreductase,	23.2836	22.9983	22.8693	22.4157	22.9442	22.9748	22.6961	22.6675
0.245486	-0.216591	MSMEG_0686|MSMEG_0686|oxidoreductase|173	25.3458	25.1851	25.05	23.8033	24.5421	24.7513	24.7316	24.4928
0.0825398	-0.0981383	MSMEG_0690|MSMEG_0690|iron-sulfur	26.5515	25.878	26.5057	24.8675	25.8469	25.3662	26.0277	26.1693
0.000678061	0.000935555	MSMEG_0692|MSMEG_0692|conserved	26.2645	25.6992	26.0857	24.3951	25.532	25.1743	26.0408	25.7013
0.131806	0.135708	MSMEG_0702|MSMEG_0702|monooxygenase|310	27.6024	28.3325	27.6638	28.9872	28.2388	28.875	27.8881	28.1268
0.151217	-0.173749	MSMEG_0703|MSMEG_0703|conserved	25.8759	25.5429	25.8894	24.1514	25.0892	24.8423	25.5555	25.2777
2.75894	0.843155	MSMEG_0709|dnaK|chaperone	31.1995	31.5467	31.2426	31.3892	32.0475	32.4558	31.8749	32.3725
1.41509	0.902754	MSMEG_0710|grpE|co-chaperone	29.0777	28.7534	29.0034	27.7762	29.468	29.1605	29.656	29.9372
0.741016	0.691445	MSMEG_0711|dnaJ|chaperone	24.4804	24.1816	24.4933	22.8525	24.6725	24.0228	25.0465	25.0317
0.739602	-0.150118	MSMEG_0717|MSMEG_0717|aldose	24.1464	24.2442	24.2676	23.8428	24.0206	23.9864	23.96	23.9336
1.74103	0.822805	MSMEG_0732|MSMEG_0732|chaperone	26.2598	26.214	26.4017	25.5242	26.7405	26.6165	26.9711	27.3627
0.136653	-0.200404	MSMEG_0741|MSMEG_0741|conserved	26.0297	25.6751	25.8901	23.8515	25.1557	24.5513	25.3686	25.5691
0.30489	-0.169908	MSMEG_0752|fbaA|fructose-bisphosphate	23.8447	24.2298	23.8621	24.5684	23.792	24.4113	23.6947	23.9273
0.150344	0.154803	MSMEG_0753|MSMEG_0753|conserved	23.6686	23.2276	24.217	22.593	23.4584	23.0998	23.9443	23.8229
0.0626004	-0.0797348	MSMEG_0754|MSMEG_0754|conserved	28.6844	28.5385	28.5595	26.9234	28.1345	27.6411	28.1493	28.462
0.106593	0.13446	MSMEG_0759|purA|adenylosuccinate	26.298	26.5173	25.8333	27.7299	26.875	27.211	26.1103	26.72
0.401024	0.350483	MSMEG_0766|purT|phosphoribosylglycinamide	24.8571	24.7126	24.8861	26.1136	25.5179	26.0358	25.0635	25.354
0.0464942	0.0350566	MSMEG_0768|MSMEG_0768|conserved	27.2111	27.3883	27.0027	27.9337	27.4619	27.8151	26.9757	27.4233
0.0689079	0.0719385	MSMEG_0769|metZ|O-succinylhomoserine	26.6818	27.0881	26.1712	27.734	27.1612	27.2925	26.5034	27.0057
0.401635	-0.22249	MSMEG_0775|MSMEG_0775|metallo-beta-lactamase	23.1754	23.5103	23.1168	22.489	22.7867	22.7596	22.659	23.1962
0.209154	0.137956	MSMEG_0777|MSMEG_0777|F420-dependent	27.4429	27.4448	27.0954	26.3899	27.4628	27.061	27.2175	27.1836
0.137872	-0.0743122	MSMEG_0779|MSMEG_0779|short-chain	23.3355	23.0002	22.9623	22.4871	23.1712	22.7136	22.8675	22.7355
0.14619	-0.111606	MSMEG_0783|pta|phosphate	24.134	24.2521	24.0792	23.2478	24.1286	23.3049	23.9422	23.8909
0.0520361	0.0751967	MSMEG_0784|ackA|acetate	22.1887	22.728	22.0206	24.0067	23.0817	23.3033	22.2571	22.6027
0.269517	-0.181434	MSMEG_0789|thiE|thiamine-phosphate	25.9312	26.1729	25.6881	24.9684	25.5104	25.476	25.7601	25.2885
0.153289	0.196026	MSMEG_0791|thiO|glycine	23.1828	24.0466	23.0585	24.8037	24.1003	24.6799	23.5566	23.539
0.134154	-0.085743	MSMEG_0793|thiG|thiazole	28.0937	27.7021	28.0639	27.1956	27.6077	27.371	27.893	27.8407
0.158987	-0.0989203	MSMEG_0806|MSMEG_0806|hydrolase|503	23.3877	23.388	23.2105	22.6125	22.9944	22.7274	23.0166	23.4646
0.0420315	-0.0170355	MSMEG_0814|MSMEG_0814|membrane	23.3815	22.8193	22.9308	23.1325	23.1379	23.1592	23.0374	22.8615
0.131634	0.130491	MSMEG_0824|MSMEG_0824|conserved	23.81	23.0083	24.1832	23.7699	23.5105	23.3195	24.5902	23.8731
0.0203532	0.014976	MSMEG_0825|thiD|phosphomethylpyrimidine	26.242	26.6554	26.4061	27.2432	26.6579	26.9764	26.4029	26.5694
0.210554	-0.125535	MSMEG_0826|thiC|thiamine	26.4468	26.4096	26.205	27.1887	26.4766	26.6956	26.2321	26.3437
0.142757	-0.237261	MSMEG_0828|MSMEG_0828|immunogenic	27.3734	26.5377	27.1454	24.7651	26.1467	25.626	26.6483	26.4516
0.306519	-0.439326	MSMEG_0832|def|peptide	27.1309	26.7136	26.7641	24.6587	25.8341	25.2654	26.1707	26.2398
0.117809	0.0979471	MSMEG_0834|MSMEG_0834|tuberculin	25.8853	25.5521	25.6515	24.6266	25.624	25.2291	25.8669	25.3873
0.15003	0.0718603	MSMEG_0835|sodC|copper/zinc	26.9732	26.6773	26.6244	26.486	26.8806	26.5761	26.4611	27.1305
0.370968	-0.354812	MSMEG_0842|MSMEG_0842|hypothetical	24.1654	23.5198	24.1816	22.565	23.3119	22.767	23.4308	23.5029
0.158002	-0.0898652	MSMEG_0858|MSMEG_0858|cell	23.687	23.7041	23.4924	22.8566	23.3076	23.2012	23.2627	23.6092
0.490495	0.290012	MSMEG_0859|MSMEG_0859|transcriptional	26.8844	27.6095	27.2598	27.8465	27.6854	28.1113	27.2837	27.6798
0.0765023	-0.115526	MSMEG_0863|MSMEG_0863|short	24.6505	24.3161	24.8136	22.7078	23.9194	23.3456	24.4691	24.2918
0.159476	0.16124	MSMEG_0867|MSMEG_0867|hydrolase|271	23.3598	23.993	23.2905	24.7031	23.8001	24.3828	23.5124	24.2961
0.0723189	-0.103664	MSMEG_0876|MSMEG_0876|short	24.763	24.1755	24.9636	22.9574	24.1979	23.3964	24.3979	24.4526
0.226225	0.0779357	MSMEG_0877|MSMEG_0877|dihydrodipicolinate	26.4658	26.5257	26.1109	26.0655	26.2739	26.4971	26.2214	26.4873
0.466667	0.321761	MSMEG_0880|groL1|chaperonin	34.1175	33.819	34.2529	33.0388	34.0622	33.7671	34.504	34.1819
0.113667	-0.100966	MSMEG_0882|MSMEG_0882|conserved	23.822	23.5197	23.8696	22.6665	23.2508	22.9233	23.6202	23.6795
0.12493	0.0868297	MSMEG_0884|MSMEG_0884|glyoxalase	24.4741	24.2564	24.6465	25.062	24.655	25.2633	24.3955	24.4725
0.362023	0.089057	MSMEG_0887|MSMEG_0887|conserved	22.1128	22.1692	22.3573	21.9387	22.2213	22.4115	22.1289	22.1724
0.11064	0.150242	MSMEG_0899|MSMEG_0899|prolyl	24.5706	25.1242	24.435	26.4756	25.3926	25.7637	24.8632	25.1868
0.66741	-0.331471	MSMEG_0901|MSMEG_0901|conserved	26.5925	26.4048	26.1511	25.6345	25.7968	25.6818	25.7665	26.212
0.333244	0.354531	MSMEG_0903|lpdA|dihydrolipoamide	27.2071	27.3503	27.4444	28.9479	28.1414	28.6438	27.8006	27.7821
0.542179	0.40258	MSMEG_0909|MSMEG_0909|acyl-ACP	23.8793	23.5115	23.4459	22.3122	23.7276	23.5361	23.6579	23.8377
0.0756248	0.0948052	MSMEG_0911|aceA|isocitrate	29.8847	30.2281	29.7439	31.4553	30.2294	31.1005	30.1835	30.178
0.303427	0.254176	MSMEG_0912|MSMEG_0912|3-hydroxybutyryl-CoA	27.083	27.359	26.7374	28.0508	27.5614	28.1503	27.1339	27.4014
1.57557	0.105601	MSMEG_0913|MSMEG_0913|methoxy	25.7674	25.8801	25.7793	25.8748	25.962	25.8882	25.9061	25.9677
0.196648	0.168815	MSMEG_0918|MSMEG_0918|transcriptional	26.3193	25.6611	25.2169	24.9843	25.7737	25.5447	25.3802	26.1582
0.338148	0.26775	MSMEG_0919|MSMEG_0919|heparin-binding	30.3354	30.1287	29.9585	29.1251	30.1322	29.6679	30.1241	30.6944
0.0284598	-0.0144329	MSMEG_0922|deoC|deoxyribose-phosphate	24.2827	24.6065	24.3309	23.9671	24.035	24.3909	24.1588	24.5447
0.298653	0.370243	MSMEG_0928|murB|UDP-N-acetylenolpyruvoylglucosamine	21.8983	22.0493	21.6454	23.5129	22.8643	23.288	21.8375	22.5971
0.213836	0.176587	MSMEG_0930|MSMEG_0930|serine	25.0445	24.9464	24.7792	26.1388	25.3349	25.7447	25.2587	25.277
0.0393209	-0.0243998	MSMEG_0935|MSMEG_0935|2,3-bisphosphoglycerate-dependent	28.7253	28.8531	28.6011	29.2909	28.7147	29.2885	28.5841	28.7856
0.552669	0.298836	MSMEG_0937|regX3|DNA-binding	23.8408	23.8459	23.9467	24.4164	24.2209	24.5309	23.7613	24.7321
0.122712	0.19044	MSMEG_0938|MSMEG_0938|conserved	22.3463	21.7242	22.6487	23.8078	22.6511	23.5385	23.2772	21.822
0.0118146	-0.021925	MSMEG_0940|MSMEG_0940|conserved	26.8938	26.2669	27.0049	24.6636	26.2311	25.278	26.6072	26.6251
0.127336	-0.0413623	MSMEG_0943|proC|pyrroline-5-carboxylate	26.9448	27.1395	26.7351	27.1533	26.8465	27.1622	26.8736	26.9249
0.109835	-0.0886202	MSMEG_0944|MSMEG_0944|DNA	23.1109	22.3698	23.1846	22.1052	22.7945	22.4148	22.8591	22.3477
0.249445	0.0605025	MSMEG_0948|MSMEG_0948|conserved	25.2148	24.9052	25.2734	25.2786	25.0993	25.2821	25.2786	25.2539
0.272157	0.147673	MSMEG_0953|hemC|porphobilinogen	24.5653	24.9452	24.8116	24.0094	24.7755	24.4958	24.7394	24.9114
0.0714247	-0.0713434	MSMEG_0954|hemD|uroporphyrinogen-III	26.0716	25.5528	25.6079	24.4756	25.2461	25.1178	25.3986	25.66
0.566969	0.582631	MSMEG_0956|hemB|delta-aminolevulinic	22.7389	24.1944	23.5678	25.0025	24.4116	24.5506	24.4003	24.4715
0.0182875	0.0234547	MSMEG_0969|hemL|glutamate-1-semialdehyde-2,1-aminomutase|451	26.6192	27.0864	26.3742	28.0237	27.0857	27.6593	26.5016	26.9507
0.191172	0.170577	MSMEG_0978|MSMEG_0978|aminotransferase,	22.2827	22.1385	22.3088	23.2808	22.9112	23.1526	22.0823	22.5471
0.112091	0.0628023	MSMEG_0983|MSMEG_0983|two-component	24.3991	24.0921	24.2275	23.5165	24.0629	23.9738	24.0997	24.35
1.1871	0.397951	MSMEG_0987|MSMEG_0987|hypothetical	22.9796	22.9739	23.0215	22.5381	23.1859	22.9988	23.2792	23.6409
0.10646	-0.124668	MSMEG_0989|MSMEG_0989|conserved	26.3212	26.0765	25.638	24.4124	25.5891	25.2641	25.467	25.6292
0.937068	0.228037	MSMEG_2290|MSMEG_2290|transcriptional;MSMEG_1010|MSMEG_1010|transcriptional	24.1936	24.472	24.2906	24.3144	24.4422	24.2973	24.6497	24.7935
0.370428	-0.0922661	MSMEG_2296|MSMEG_2296|secreted;MSMEG_1016|MSMEG_1016|secreted	21.2536	21.3573	21.2839	21.4172	20.9476	21.4068	21.3433	21.2453
0.667919	0.294073	MSMEG_2299|MSMEG_2299|ribonucleoside-diphosphate;MSMEG_1019|MSMEG_1019|ribonucleoside-diphosphate	24.5807	24.2959	24.4837	24.1712	24.9162	24.1112	24.9009	24.7794
0.308602	0.246364	MSMEG_2301|MSMEG_2301|glyoxalase/bleomycin;MSMEG_1021|MSMEG_1021|glyoxalase/bleomycin	22.4291	22.7385	22.4114	23.4931	23.04	23.6167	22.5835	22.8174
0.0503759	-0.0482817	MSMEG_2308|MSMEG_2308|geranylgeranyl;MSMEG_1028|MSMEG_1028|geranylgeranyl	25.4511	25.1139	25.3	24.2699	25.0947	24.4139	25.0228	25.4105
0.66497	0.6855	MSMEG_2310|MSMEG_2310|monooxygenase|499;MSMEG_1030|MSMEG_1030|monooxygenase|499	24.2256	24.2101	23.4614	25.3229	25.1103	25.1829	24.0961	25.5727
0.342604	0.237533	MSMEG_2313|MSMEG_2313|ribonucleoside-diphosphate;MSMEG_1033|MSMEG_1033|ribonucleoside-diphosphate	25.9382	26.1287	25.763	27.0497	26.5174	26.4903	26.2312	26.5909
0.125974	0.145072	MSMEG_2317|MSMEG_2317|alcohol;MSMEG_1037|MSMEG_1037|alcohol	27.8757	28.4071	27.93	29.4093	28.3748	29.2275	28.0697	28.5305
0.0325599	-0.0194554	MSMEG_2319|MSMEG_2319|Periplasmic;MSMEG_1039|MSMEG_1039|Periplasmic	24.8612	24.8981	24.533	25.3258	25.0591	25.0552	24.5226	24.9034
0.202198	-0.366957	MSMEG_2322|MSMEG_2322|hypothetical;MSMEG_1042|MSMEG_1042|hypothetical	26.4661	25.6855	26.6414	23.8533	25.2551	24.3738	25.8308	25.7187
0.817501	0.154908	MSMEG_2326|MSMEG_2326|ABC-type;MSMEG_1046|MSMEG_1046|ABC-type	25.6364	25.8537	25.7948	25.9427	25.8385	26.1461	25.8753	25.9874
0.12659	0.0688472	MSMEG_2327|MSMEG_2327|nudix;MSMEG_1047|MSMEG_1047|nudix	24.2049	24.4394	24.2343	24.702	24.3019	24.9499	24.1881	24.4158
0.612496	-0.454988	MSMEG_2328|MSMEG_2328|probable;MSMEG_1048|MSMEG_1048|probable	23.9308	24.538	24.2288	23.2468	23.692	23.0147	24.0409	23.3768
0.0904914	0.0306907	MSMEG_2329|MSMEG_2329|methyltransferase,;MSMEG_1049|MSMEG_1049|methyltransferase,	24.4936	24.0272	24.3848	24.4774	24.4766	24.4767	24.2905	24.2619
0.00773142	0.00535727	MSMEG_2331|MSMEG_2331|immunogenic;MSMEG_1051|MSMEG_1051|immunogenic	27.282	27.5153	26.9046	26.6407	27.1075	27.4449	26.8995	26.9121
0.0975058	-0.0581732	MSMEG_2333|MSMEG_2333|conserved;MSMEG_1053|MSMEG_1053|conserved	23.7648	23.1492	22.957	23.12	23.3061	23.0493	22.9176	23.4853
0.141226	0.118258	MSMEG_1060|MSMEG_1060|putative	26.6828	26.7898	26.6477	25.4806	26.5142	26.3853	26.7361	26.4384
1.71325	0.47068	MSMEG_1061|MSMEG_1061|phosphohydrolase|204	23.6385	23.6564	23.6208	24.1749	24.1911	24.3882	24.096	24.298
0.0486506	0.0266972	MSMEG_1063|MSMEG_1063|conserved	22.9572	23.0647	22.5547	22.6623	22.8188	23.184	22.4549	22.8879
0.0974793	0.118091	MSMEG_1066|MSMEG_1066|conserved	24.9955	24.5864	23.9371	23.1221	24.3809	24.0506	23.9646	24.7174
0.0700787	0.0740433	MSMEG_1075|menB|naphthoate	25.9958	26.4727	25.8057	27.3146	26.5803	26.7773	25.9805	26.5468
0.0606189	0.0332389	MSMEG_1076|MSMEG_1076|conserved	28.6372	28.3507	28.2139	27.7785	28.498	28.1686	28.2593	28.1874
0.0357225	-0.0219378	MSMEG_1077|MSMEG_1077|conserved	23.767	23.431	23.2674	22.9817	23.5938	22.9733	23.3156	23.4767
0.778982	-0.656109	MSMEG_1089|MSMEG_1089|hypothetical	25.2501	24.9034	24.9185	23.5989	23.9897	23.4576	24.3685	24.2306
0.273629	-0.161038	MSMEG_1090|MSMEG_1090|amidase|468	24.1209	24.6027	23.9355	24.5142	24.1189	24.6005	23.6987	24.111
0.0624657	0.039803	MSMEG_1108|MSMEG_1108|hydrolase,	24.5436	24.3627	24.5244	23.8566	24.2882	23.9933	24.4005	24.7646
0.0908437	0.0579123	MSMEG_1109|MSMEG_1109|2-oxoglutarate	23.2343	23.414	23.017	23.8833	23.5917	23.7444	23.3415	23.1028
0.920946	-0.293293	MSMEG_1112|MSMEG_1112|aconitate	23.5342	23.5218	23.5986	23.1503	22.9993	23.4791	22.9205	23.2327
0.0499809	-0.0993252	MSMEG_1124|FdxA|putative	23.8573	23.5071	23.6792	21.0729	22.7115	22.3957	23.1578	23.4543
0.339832	-0.488409	MSMEG_1136|MSMEG_1136|conserved	26.0532	25.1283	25.5545	23.3712	24.5344	24.026	24.9664	24.6268
0.128773	-0.142139	MSMEG_1165|MSMEG_1165|conserved	28.9688	28.8526	28.7399	27.4939	28.2852	27.7503	28.6741	28.7771
0.110445	-0.210915	MSMEG_1174|MSMEG_1174|cadmium	23.3802	22.1804	23.9917	21.9195	24.0688	22.0348	22.7123	21.8122
0.140552	-0.134133	MSMEG_1179|hutU|urocanate	21.9766	22.7142	22.297	23.551	22.7295	22.6875	22.2521	22.3332
0.329404	0.133748	MSMEG_1182|hutI|imidazolonepropionase|396	22.6303	22.6543	22.3627	23.1096	22.8537	22.9445	22.6	22.8936
0.00102558	0.000591278	MSMEG_1215|MSMEG_1215|serine/threonine-protein	24.163	23.9286	23.4287	23.5094	23.7295	23.9895	23.6147	23.6984
0.231383	-0.165604	MSMEG_1216|MSMEG_1216|ABC-type	22.4368	22.1502	21.9153	21.6554	21.6896	21.3485	21.9996	22.4577
0.0925963	-0.0600629	MSMEG_1242|iscS|cysteine	25.0964	25.5755	25.3763	26.1227	25.3865	25.7556	25.334	25.4546
0.020886	-0.0293775	MSMEG_1245|MSMEG_1245|phosphoadenosine	23.0791	22.6586	22.5093	21.3181	22.4039	21.552	22.539	22.9527
0.0998385	-0.0510082	MSMEG_1255|MSMEG_1255|UvrD/Rep	22.5914	22.7306	22.468	22.3168	22.7526	22.0474	22.383	22.7198
0.155542	0.0819702	MSMEG_1260|MSMEG_1260|hypothetical	22.9795	22.9279	23.2364	22.6374	23.1424	22.5554	23.273	23.1384
0.139981	-0.0845084	MSMEG_1265|MSMEG_1265|conserved	24.9336	25.2894	24.4937	25.2874	25.2113	24.8018	24.621	25.032
0.284067	-0.131082	MSMEG_1285|MSMEG_1285|tetratricopeptide	26.8872	27.151	26.8504	26.3772	26.5416	26.8237	26.475	26.901
0.0928607	0.0365038	MSMEG_1294|MSMEG_1294|allantoicase|168	21.4848	21.5763	21.2082	21.7434	21.5274	21.7641	21.3259	21.5413
0.354199	0.509751	MSMEG_1296|MSMEG_1296|uricase|299	23.4059	23.7266	22.8646	25.4027	24.3708	25.1546	23.7822	24.1312
0.134074	-0.113813	MSMEG_1334|MSMEG_1334|metallo-beta-lactamase	25.4687	25.9773	25.0429	26.1128	25.2068	26.0011	25.1745	25.7641
0.0493891	-0.05937	MSMEG_1339|rpmG|ribosomal	26.6675	26.2138	27.4042	25.7296	26.4321	25.8405	26.9147	26.5904
1.44827	0.243188	MSMEG_1340|MSMEG_1340|conserved	24.9298	25.0305	24.955	25.1744	25.1929	25.2938	25.1234	25.4523
1.13775	0.217611	MSMEG_1341|MSMEG_1341|MaoC	25.6906	25.6627	25.6063	25.2747	25.7384	25.746	25.8583	25.7621
0.121825	0.0560985	MSMEG_1342|MSMEG_1342|conserved	24.549	24.3045	24.1554	23.9186	24.4436	24.1046	24.0932	24.5104
0.0230529	0.0185795	MSMEG_1345|MSMEG_1345|transcription	28.5701	28.4907	28.3933	27.4404	28.1639	28.078	28.2911	28.4358
0.0489341	0.0661306	MSMEG_1346|rplK|ribosomal	29.3572	28.8642	29.418	27.8386	28.94	28.0968	29.4836	29.2222
0.0973799	-0.168829	MSMEG_1347|rplA|ribosomal	31.3754	30.7513	31.1194	29.0047	30.34	29.4723	31.072	30.6912
0.31807	-0.128584	MSMEG_1349|MSMEG_1349|dgpf	23.4059	23.979	23.3122	23.6709	23.4985	23.5773	23.22	23.5578
0.0664082	-0.0889583	MSMEG_1364|MSMEG_1364|50S	31.7097	31.1002	31.3137	29.7992	30.7347	30.3061	31.3946	31.1317
0.155892	-0.0971155	MSMEG_1365|rplL|ribosomal	33.2356	32.9668	32.9744	32.2119	32.6376	32.6687	33.0225	32.6716
0.0272109	-0.0211349	MSMEG_1367|rpoB|DNA-directed	28.6099	28.5546	28.6587	27.6509	28.2889	28.0478	28.5254	28.5275
0.150014	-0.10733	MSMEG_1368|rpoC|DNA-directed	27.7311	27.5952	27.7751	26.7745	27.3307	26.9841	27.6277	27.5042
0.0110671	-0.0103307	MSMEG_1374|MSMEG_1374|ribose	23.4718	23.2334	23.5879	23.2199	23.7998	23.1092	22.642	23.9208
0.228077	-0.154356	MSMEG_1375|MSMEG_1375|tagatose-1,6-bisphosphate	21.6005	21.7059	21.6097	20.8081	21.3504	21.0659	21.7368	20.9536
0.732969	-0.611195	MSMEG_1376|MSMEG_1376|putative	24.0033	23.8181	23.9742	22.5844	23.2486	22.6471	23.4844	22.5553
0.084385	0.0725236	MSMEG_1383|MSMEG_1383|endonuclease	25.4131	24.9438	25.408	24.2811	24.9467	24.764	25.5112	25.1141
0.139384	0.19413	MSMEG_1387|MSMEG_1387|putative	23.2833	23.6564	23.3246	25.1665	24.3117	24.7181	23.4651	23.7124
0.173303	0.114322	MSMEG_1393|MSMEG_1393|conserved	24.2311	24.4162	24.6978	24.4055	24.6027	23.9237	24.605	25.0764
0.755291	0.322296	MSMEG_1399|rpsG|ribosomal	28.7744	28.0454	28.9657	28.6314	29.0546	28.7745	29.0295	28.8475
0.435472	0.171993	MSMEG_1401|tuf|translation	32.3975	32.4942	32.3517	32.9016	32.6575	33.0477	32.6752	32.4524
0.163858	-0.17374	MSMEG_1403|MSMEG_1403|cutinase	24.7691	23.9367	24.2881	23.0773	23.9152	23.3008	24.2616	23.8988
0.22841	-0.217694	MSMEG_1410|MSMEG_1410|carveol	23.0187	23.6487	23.5709	24.494	23.7371	23.9577	23.2341	22.9327
0.163418	-0.0844784	MSMEG_1416|MSMEG_1416|Pyridine	26.9755	27.0416	26.9817	26.2174	26.7544	26.6342	26.796	26.6937
0.0396907	-0.022378	MSMEG_1417|MSMEG_1417|glyoxalase	23.6484	24.2417	23.7444	24.246	23.9508	24.2673	23.7665	23.8065
0.676114	-0.722144	MSMEG_1422|MSMEG_1422|conserved	25.759	24.7674	24.8524	23.8086	23.9973	23.2971	24.8938	24.1107
0.499847	-0.448252	MSMEG_1423|MSMEG_1423|radical	24.4464	24.0497	22.9259	23.1597	23.2102	22.9272	23.7461	22.9051
0.936039	-0.411085	MSMEG_1424|MSMEG_1424|FMN-dependent	26.3241	25.725	26.3351	26.3099	25.728	25.4035	26.2091	25.7092
0.122174	-0.0588551	MSMEG_1428|MSMEG_1428|glucose-methanol-choline	22.8795	23.0274	22.7149	23.5246	23.0985	22.9778	22.901	22.9336
0.0293721	-0.0528307	MSMEG_1435|rpsJ|ribosomal	30.3516	29.6792	30.0308	27.9663	29.4405	28.5715	29.858	29.9466
0.101459	-0.0950351	MSMEG_1436|rplC|ribosomal	27.7157	27.1815	27.3405	26.5862	27.3396	26.3576	27.3923	27.3542
0.0904904	-0.0751886	MSMEG_1437|rplD|ribosomal	28.8453	28.0314	28.9527	28.3281	28.4267	28.1522	29.0691	28.2086
0.808693	-0.357203	MSMEG_1438|rplW|ribosomal	29.4883	29.3654	29.2845	28.7125	28.8907	28.6828	29.2283	28.6201
0.176699	0.180206	MSMEG_1439|rplB|ribosomal	28.6741	28.271	29.1433	27.748	28.8902	27.8968	29.1081	28.6621
0.0981916	-0.161247	MSMEG_1440|rpsS|ribosomal	28.2996	27.1637	28.5705	26.5352	27.4809	26.5722	28.3569	27.5139
0.0492969	-0.0814033	MSMEG_1441|MSMEG_1441|50S	29.1594	28.601	28.7825	26.9694	28.4693	27.3662	28.7866	28.5646
0.0847771	-0.0894885	MSMEG_1442|rpsC|ribosomal	26.4664	26.1138	26.6016	25.2465	26.1501	25.3362	26.3474	26.2367
0.810602	0.313617	MSMEG_1443|rplP|ribosomal	27.1116	26.6291	26.8168	26.2169	27.042	27.1062	26.8947	26.986
0.0265077	0.0496097	MSMEG_1444|rpmC|ribosomal	30.5416	29.9148	30.1211	28.1383	29.6069	28.7574	30.2853	30.2648
0.0635527	0.0848975	MSMEG_1445|MSMEG_1445|30S	28.8621	27.452	28.6511	27.2461	28.054	27.6247	28.7737	28.0984
0.0430752	-0.0504141	MSMEG_1465|rplN|ribosomal	27.0746	26.6155	26.5471	25.3516	26.435	25.8287	26.5342	26.5894
0.0713905	-0.11202	MSMEG_1466|rplX|ribosomal	29.4431	28.786	29.3333	27.8724	28.7537	27.6031	29.6909	28.9391
0.036849	-0.016788	MSMEG_1467|MSMEG_1467|50S	27.3551	27.0329	27.0969	26.8353	27.0523	26.9567	26.8558	27.3882
0.396919	0.127877	MSMEG_1469|rpsH|ribosomal	26.7548	26.2046	26.6172	26.6956	26.8288	26.5818	26.7955	26.5777
0.149301	0.120201	MSMEG_1470|MSMEG_1470|50S	29.5563	28.8145	29.62	28.6554	29.2887	28.8092	29.6846	29.3444
0.0383529	-0.0657563	MSMEG_1471|rplR|ribosomal	30.8599	30.5232	30.3216	28.5772	29.9787	29.1593	30.3434	30.5375
0.415827	0.399468	MSMEG_1472|rpsE|ribosomal	28.5103	28.1923	29.4154	27.8482	28.7938	28.3548	29.605	28.8104
0.563366	0.379707	MSMEG_1474|rplO|ribosomal	28.6829	28.0138	28.8165	28.1771	28.9374	28.5832	29.423	28.2655
0.0684353	-0.042069	MSMEG_1475|MSMEG_1475|conserved	23.9308	23.8587	23.2146	23.4519	23.5161	23.9065	23.2361	23.6291
0.819074	-0.259326	MSMEG_1476|sppA|signal	25.4744	25.0835	25.6464	25.054	24.947	24.958	25.1627	25.1533
0.395789	-0.145338	MSMEG_1479|MSMEG_1479|methyltransferase,	25.8302	25.9784	25.5315	25.3886	25.3874	25.7272	25.3862	25.6466
0.287672	0.11433	MSMEG_1480|MSMEG_1480|methyltransferase|298	24.1376	24.4111	24.2867	23.7814	24.1041	24.3779	24.1151	24.477
0.134825	0.0603404	MSMEG_1482|MSMEG_1482|methyltransferase|304	24.8956	25.3278	25.2717	25.1765	25.0146	25.5934	25.0089	25.296
0.0437025	0.0563898	MSMEG_1484|MSMEG_1484|adenylate	30.941	30.7115	30.8118	29.1373	30.4689	30.0293	30.6948	30.6342
0.218984	-0.144206	MSMEG_1485|map|methionine	24.9881	24.615	24.5446	23.8027	24.1925	24.1882	24.4797	24.5133
0.299364	-0.100196	MSMEG_1496|mmsB|3-hydroxyisobutyrate	22.7765	22.9056	22.921	23.2578	22.8712	23.0798	22.894	22.6151
0.0381869	-0.0500393	MSMEG_1498|mmsA|methylmalonate-semialdehyde	24.7176	25.4487	25.0258	26.5462	25.3938	25.9897	25.0573	25.0973
0.116253	0.0936546	MSMEG_1512|rfbB|dTDP-glucose	24.8494	25.047	24.3631	25.6361	25.2547	25.269	24.6572	25.0893
0.160367	0.120158	MSMEG_1513|MSMEG_1513|conserved	26.8546	26.6871	27.0763	27.6692	26.8198	27.7204	27.1999	27.0278
0.0307263	-0.0497169	MSMEG_1517|MSMEG_1517|spfh	26.1015	25.2861	25.8185	23.815	25.3997	24.5329	25.4324	25.4572
0.0595264	-0.0866842	MSMEG_1519|infA|translation	27.632	27.5029	27.4787	26.256	27.019	26.0638	27.5034	27.9366
0.0431841	-0.0474	MSMEG_1521|rpsM|ribosomal	29.6526	29.4976	29.4029	28.2207	29.3477	28.5601	29.3117	29.3647
0.158584	0.243443	MSMEG_1522|rpsK|ribosomal	24.2019	23.9498	25.6059	25.0496	25.0509	24.6374	26.1171	23.9755
0.793718	0.192537	MSMEG_1523|rpsD|ribosomal	28.6932	28.565	28.8652	28.3096	28.824	28.7304	28.7864	28.8624
0.293808	0.0709047	MSMEG_1524|rpoA|DNA-directed	29.96	30.1398	30.0723	29.8997	30.0274	30.2691	30.1771	29.8818
0.620933	-0.310478	MSMEG_1525|MSMEG_1525|50S	25.9625	25.6253	26.4243	26.3539	25.4748	25.7252	26.188	25.7361
0.0258843	0.0483584	MSMEG_1528|MSMEG_1528|cutinase|224	26.8554	26.4377	26.5996	24.2855	26.0827	25.4204	26.4116	26.4569
0.0246647	-0.0537372	MSMEG_1529|MSMEG_1529|serine	27.6378	27.0172	27.3206	24.7005	26.5515	25.7119	27.1121	27.0858
1.73757	-0.694568	MSMEG_1543|MSMEG_1543|eptc-inducible	29.6172	29.9317	29.4028	30.2519	29.2228	29.0039	29.3482	28.8504
1.68402	-0.631589	MSMEG_1544|MSMEG_1544|PduO	26.7826	26.7572	26.7851	26.9548	26.2138	25.9187	26.7378	25.8831
0.907855	-0.844638	MSMEG_1546|MSMEG_1546|coenzyme	29.1208	28.9459	28.3954	27.4512	27.5609	27.5411	28.4059	27.027
1.0059	-0.759613	MSMEG_1547|MSMEG_1547|glycerol	27.5668	27.8332	27.2982	28.5566	27.2044	27.4185	27.3662	26.2273
0.625149	-0.648392	MSMEG_1548|MSMEG_1548|propanediol	27.5033	27.0411	27.1142	25.6786	26.2144	25.8516	26.9951	25.6826
0.378957	-0.56556	MSMEG_1554|eutC|ethanolamine	24.2664	23.7806	24.3033	22.0014	23.1822	22.1118	23.8512	22.9443
0.662944	0.32609	MSMEG_1556|rplM|ribosomal	26.9601	26.2962	26.9987	27.1804	27.2112	27.0242	27.5574	26.947
0.0112192	0.0181403	MSMEG_1557|rpsI|ribosomal	29.9624	29.3761	29.8827	27.9351	29.292	28.5378	29.7685	29.6306
0.0477021	-0.0385976	MSMEG_1559|glmM|phosphoglucosamine	24.5054	24.1975	24.4411	23.5462	24.034	23.7824	24.0861	24.6333
0.199646	-0.197052	MSMEG_1567|MSMEG_1567|conserved	24.4846	23.6119	24.2046	22.8412	23.6771	23.1843	23.8435	23.6492
0.00677277	-0.00747776	MSMEG_1574|MSMEG_1574|glutamate	26.9502	27.3895	26.864	28.285	27.478	27.8045	27.0088	27.1675
0.0994963	0.0537739	MSMEG_1575|alr|alanine	23.3761	23.2283	23.0185	23.5401	23.26	23.6799	22.9252	23.513
0.161036	-0.230587	MSMEG_1578|MSMEG_1578|peptidase	25.8891	25.3199	25.5154	23.6978	24.764	24.1862	25.1572	25.3926
1.2722	-0.311054	MSMEG_1580|MSMEG_1580|O-sialoglycoprotein	23.4946	23.2339	23.3272	22.9659	22.7917	23.1124	22.8943	22.979
2.66655	0.523712	MSMEG_1582|groS|chaperonin	32.9812	32.9242	33.16	32.9276	33.4059	33.6414	33.694	33.3465
1.11998	0.57695	MSMEG_1583|groL2|chaperonin	31.6922	31.3779	31.5856	30.6191	31.8009	31.6084	32.0572	32.1163
0.381182	-0.309768	MSMEG_1600|MSMEG_1600|conserved	23.4796	22.9387	23.1344	21.9183	22.6014	22.2244	22.7131	22.6929
0.515014	0.110599	MSMEG_1601|MSMEG_1601|conserved	23.7592	23.6724	23.5991	23.5665	23.8887	23.9369	23.6197	23.5942
0.0624924	-0.0726676	MSMEG_1602|guaB|inosine-5'-monophosphate	27.3895	27.0375	27.4073	25.8298	26.7638	26.3736	27.1648	27.0712
0.824245	0.387318	MSMEG_1603|MSMEG_1603|IMP	27.348	27.6493	27.5831	28.0969	28.0954	28.5328	27.8534	27.7449
0.111653	0.0552554	MSMEG_1610|MSMEG_1610|glutamine-hydrolyzing	25.9294	26.357	25.9557	26.2613	26.3873	26.483	25.9006	25.9536
0.0232666	-0.0175629	MSMEG_1634|MSMEG_1634|probable	28.5661	28.1473	28.7899	27.9092	28.0951	28.041	28.7303	28.4758
0.126561	-0.0397282	MSMEG_1635|MSMEG_1635|nitroreductase	26.6074	26.32	26.1584	26.1302	26.3202	26.3274	26.2694	26.1401
0.349053	-0.482027	MSMEG_1637|MSMEG_1637|periplasmic	23.8804	23.2877	24.1141	21.8146	22.6107	22.0607	23.1116	23.3859
0.392276	-0.458757	MSMEG_1639|MSMEG_1639|conserved	23.2511	22.4043	22.8222	21.2877	22.1694	21.1225	22.4149	22.2236
0.248017	-0.302786	MSMEG_1642|MSMEG_1642|ABC	25.0887	24.4684	25.0174	23.2418	24.1178	23.4449	24.563	24.4795
0.335005	-0.104386	MSMEG_1647|MSMEG_1647|tetrahydrofolate	27.7825	27.4882	27.2272	27.2688	27.2538	27.3387	27.4404	27.3164
0.27888	-0.188128	MSMEG_1651|metX|homoserine	25.267	25.8314	25.3935	26.3231	25.3589	25.7355	25.1869	25.7813
0.0438911	0.0599847	MSMEG_1652|MSMEG_1652|O-acetylhomoserine	27.6619	27.9256	27.5151	29.1939	28.0936	28.9336	27.8852	27.624
0.0711976	-0.0656137	MSMEG_1654|MSMEG_1654|isocitrate	29.2102	29.4472	28.9265	30.3128	29.5222	29.74	29.1218	29.2501
0.000724301	-0.000276566	MSMEG_1655|MSMEG_1655|hydrolase,	22.324	22.1191	22.553	22.5421	22.4603	22.3013	22.5515	22.2239
1.13242	0.27284	MSMEG_1656|xth|exodeoxyribonuclease	21.1825	21.0813	21.5923	21.3011	21.4763	21.6946	21.4433	21.6344
0.0527044	0.0164323	MSMEG_1657|trpS|tryptophanyl-tRNA	26.2151	26.44	26.0827	26.0275	26.1807	26.0856	26.1921	26.3726
0.288098	-0.269661	MSMEG_1661|MSMEG_1661|D-alanyl-D-alanine	23.7175	23.5875	23.364	22.0834	22.8065	22.6769	23.1124	23.0779
0.0370183	0.0395303	MSMEG_1662|MSMEG_1662|taurine-pyruvate	26.9944	27.3139	26.8045	28.1866	27.4486	27.7714	26.7852	27.4523
0.133663	0.109798	MSMEG_1665|MSMEG_1665|aldehyde	26.4608	26.8149	26.7732	27.6911	27.035	27.4982	26.7526	26.8933
0.00310558	0.00398302	MSMEG_1669|sdhB|succinate	27.2485	27.4915	26.6558	28.5563	27.5104	27.835	27.0638	27.559
0.21688	0.297852	MSMEG_1670|sdhA|succinate	27.8316	28.1998	27.613	29.8647	28.8171	29.094	28.1338	28.6557
0.199462	-0.100689	MSMEG_1675|MSMEG_1675|pyrimidine-nucleoside	23.15	23.6251	23.1355	23.3506	23.2381	23.5444	22.7651	23.3109
0.281447	0.166922	MSMEG_1676|add|adenosine	24.6994	25.169	24.322	25.0511	25.0527	25.386	24.7437	24.7268
3.62374	-0.881039	MSMEG_1679|MSMEG_1679|AmiB|385	25.5652	25.6392	25.5665	25.26	24.4753	24.8308	24.5642	24.6364
0.345885	-0.262768	MSMEG_1680|MSMEG_1680|conserved	27.4088	28.023	27.3844	28.3481	27.7142	28.0587	27.0539	27.2864
0.687942	-0.2622	MSMEG_1681|MSMEG_1681|endoribonuclease	28.3574	28.4649	27.9763	28.3988	28.3483	28.2294	27.7462	27.8247
1.83941	-0.695129	MSMEG_1682|MSMEG_1682|flavin-containing	24.6826	25.0716	24.5391	25.1441	24.4479	24.0552	23.8183	24.3354
0.0365637	0.0252914	MSMEG_1684|MSMEG_1684|conserved	27.9155	28.1201	27.7612	28.5527	28.0092	28.5721	27.7795	28.0899
0.127859	-0.063776	MSMEG_1694|upp|uracil	27.0207	27.2301	26.8812	26.3753	26.8989	26.7376	26.7358	26.8799
0.191472	0.0224948	MSMEG_1701|MSMEG_1701|purine	24.0886	24.0151	24.0347	24.1356	24.042	24.2022	24.0585	24.0613
0.0404389	-0.0415368	MSMEG_1703|MSMEG_1703|amidohydrolase|390	24.2232	24.3594	23.5122	24.9665	24.4251	24.5735	23.6814	24.2151
0.2047	0.197026	MSMEG_1735|MSMEG_1735|dihydrolipoamide	26.0411	26.6457	26.1124	27.4525	26.8636	27.248	26.3052	26.623
0.752836	-0.430351	MSMEG_1736|MSMEG_1736|glycerol-3-phosphate	22.4729	22.4269	22.0407	21.327	21.7424	21.3617	21.6724	21.7696
1.01332	0.258756	MSMEG_1762|MSMEG_1762|piperideine-6-carboxylic	23.4156	23.7038	23.3752	23.4916	24.0563	23.7729	23.6279	23.564
0.485067	0.463374	MSMEG_1770|MSMEG_1770|conserved	27.8297	28.3553	29.3022	27.6517	28.6231	28.5605	29.4134	28.3953
1.29327	0.297076	MSMEG_1771|MSMEG_1771|methylase,	26.09	25.6695	25.8467	26.1428	26.1351	26.381	26.1899	26.2312
0.156788	-0.176202	MSMEG_1782|MSMEG_1782|oxidoreductase,	25.1125	25.821	25.0878	25.0672	25.2753	26.0491	24.8805	24.1788
0.130118	-0.173856	MSMEG_1794|MSMEG_1794|dehydrogenase|335	24.4672	24.7247	23.7111	25.1209	24.6558	25.2393	24.0938	23.3397
1.35133	0.593379	MSMEG_1803|MSMEG_1803|RsbW	23.3281	23.5532	23.3045	23.456	24.0634	24.5462	23.4387	23.9671
0.0235918	-0.0186858	MSMEG_1804|MSMEG_1804|RNA	26.6091	26.5961	26.3179	25.4824	26.2417	26.0791	26.3038	26.3061
0.114626	-0.106597	MSMEG_1805|MSMEG_1805|conserved	25.3146	25.0635	25.1063	23.9403	24.741	24.3871	24.7396	25.1306
0.0632452	-0.0434628	MSMEG_1807|MSMEG_1807|acetyl-/propionyl-coenzyme	30.6759	30.8675	30.5662	31.5029	30.9925	30.9324	30.4885	31.0253
0.285153	0.253358	MSMEG_1809|MSMEG_1809|putative	27.6365	28.0327	27.6594	29.0961	28.4419	28.7115	28.0768	28.2078
0.180287	0.101651	MSMEG_1812|MSMEG_1812|conserved	25.3752	25.3392	25.5183	26.1456	25.5551	26.0118	25.7164	25.5016
0.19977	0.33579	MSMEG_1813|MSMEG_1813|propionyl-CoA	28.0553	28.3824	28.031	30.6375	29.1677	29.696	28.6276	28.958
0.21103	0.210037	MSMEG_1819|purK|phosphoribosylaminoimidazole	26.1368	26.7212	26.0246	27.5145	26.9293	27.2528	26.2847	26.7704
0.166219	0.0879736	MSMEG_1820|purE|phosphoribosylaminoimidazole	25.8584	26.0284	25.5511	26.1027	25.9457	26.3778	25.5774	25.9916
0.460942	0.092452	MSMEG_1821|MSMEG_1821|acyl-CoA	27.4146	27.6849	27.4437	27.4236	27.5198	27.744	27.619	27.4538
0.106249	-0.0641508	MSMEG_1822|MSMEG_1822|biotin-[acetyl-CoA-carboxylase]	25.7226	25.5822	25.9209	24.9886	25.4276	25.2508	25.5863	25.693
0.107982	0.0381107	MSMEG_1823|MSMEG_1823|conserved	23.5791	24.0127	23.682	23.991	23.7318	24.0498	23.7697	23.866
0.122681	-0.103942	MSMEG_1824|MSMEG_1824|transcriptional	23.9087	23.4748	24.2349	22.9532	23.7031	23.2297	23.8812	23.3418
0.0578629	-0.0348244	MSMEG_1825|rfbD|dTDP-4-dehydrorhamnose	26.7347	26.5894	26.2379	25.8814	26.3054	26.1488	26.2606	26.5892
0.106197	-0.166769	MSMEG_1831|MSMEG_1831|Transcription	25.8325	25.4946	25.669	23.63	25.0115	24.2268	25.3166	25.4042
0.17482	-0.0629325	MSMEG_1836|manA|mannose-6-phosphate	25.2998	25.4324	25.4569	24.8954	25.1907	25.0682	25.284	25.2898
0.336473	-0.221783	MSMEG_1852|selD|selenide,	23.9078	24.2674	23.8318	22.9664	23.6122	23.3764	23.4891	23.6086
0.235212	-0.195885	MSMEG_1868|MSMEG_1868|hypothetical	24.709	24.2519	24.3962	23.2241	24.2195	23.7406	23.9005	23.9371
0.187274	-0.31427	MSMEG_1872|MSMEG_1872|conserved	23.8607	22.6895	23.4935	21.3077	22.4518	21.6218	22.8367	23.1841
0.0888886	0.0494123	MSMEG_1873|MSMEG_1873|thymidylate	24.379	24.3753	24.2884	23.637	24.2415	24.0155	24.1566	24.4638
0.597585	0.157209	MSMEG_1874|mtrA|DNA-binding	22.7379	22.778	22.953	22.9552	23.1719	23.1359	22.6908	23.0544
0.0446184	0.0262599	MSMEG_1881|secA|preprotein	27.7988	27.4953	27.7214	27.0014	27.4855	27.2679	27.6948	27.6739
0.104892	0.108456	MSMEG_1884|MSMEG_1884|conserved	24.9017	24.6137	24.7219	23.4139	24.4493	24.0546	24.8037	24.7776
0.217235	-0.0838847	MSMEG_1890|aroA|3-phosphoshikimate	26.2329	26.4702	25.9703	26.4047	26.1718	26.4786	25.9704	26.1217
0.126082	-0.184354	MSMEG_1891|MSMEG_1891|conserved	24.1691	24.1917	24.6892	22.4317	23.6701	23.0282	23.9475	24.0984
0.0535444	0.0448709	MSMEG_1914|MSMEG_1914|RNA	27.3952	27.3072	27.0777	26.1845	27.038	26.8212	26.9802	27.3046
0.154501	0.068831	MSMEG_1919|MSMEG_1919|Transcription	24.8591	24.1084	24.2088	24.3428	24.4382	24.4534	24.3642	24.5388
0.0741316	0.0646248	MSMEG_1922|aroQ|3-dehydroquinate	24.8658	24.9122	24.5042	25.7135	25.0245	25.5827	24.7677	24.8793
0.163705	0.210153	MSMEG_1926|MSMEG_1926|phosphoglycerate	23.5526	23.8439	23.6474	25.5605	24.3481	24.771	24.147	24.1789
0.0234465	-0.0149946	MSMEG_1930|MSMEG_1930|DEAD/DEAH	25.5791	24.9595	25.4751	24.8933	25.3145	25.1823	25.4823	24.8679
0.364989	-0.178495	MSMEG_1932|MSMEG_1932|MmpS3	22.3884	22.4243	22.5676	22.1569	22.3793	21.8668	21.9062	22.6709
0.0568641	0.0612435	MSMEG_1934|MSMEG_1934|ATP-binding	29.6686	29.6379	29.0024	28.1118	29.0792	28.966	29.1588	29.4617
0.288896	-0.286904	MSMEG_1936|MSMEG_1936|conserved	23.5716	23.5519	23.1747	21.971	22.8206	22.343	22.7769	23.1811
0.00684738	0.00364208	MSMEG_1937|MSMEG_1937|molybdopterin	22.888	22.8084	23.132	22.3143	22.736	22.6954	22.8105	22.9154
0.137191	0.128754	MSMEG_1945|MSMEG_1945|ion	24.746	24.8711	24.5902	23.5122	24.5689	24.0973	24.6542	24.914
0.065264	-0.0201583	MSMEG_1946|MSMEG_1946|NADH	24.2907	24.4314	24.1704	24.1745	24.1642	24.4221	24.0305	24.3695
0.0670484	-0.0957608	MSMEG_1947|MSMEG_1947|conserved	29.4457	28.8888	29.0451	27.4028	28.3856	28.0237	29.1048	28.8852
0.175708	0.219688	MSMEG_1950|MSMEG_1950|conserved	30.1455	29.8232	30.5148	28.4459	30.0423	29.5428	30.398	29.8252
0.130406	0.160085	MSMEG_1951|MSMEG_1951|conserved	29.7552	29.4656	29.4002	27.8287	29.4015	28.9071	29.6262	29.1552
0.364899	-0.217534	MSMEG_1954|MSMEG_1954|ABC1	23.7728	23.8211	23.6527	22.8531	23.2627	23.0001	23.3738	23.593
0.33607	0.188164	MSMEG_1957|MSMEG_1957|conserved	26.7462	26.4739	26.5617	25.7819	26.5102	26.3769	26.5271	26.9023
0.0667704	-0.10221	MSMEG_1959|MSMEG_1959|putative	23.9888	23.8715	24.444	22.3464	23.6072	22.7017	24.0186	23.9144
0.227147	-0.215124	MSMEG_1961|MSMEG_1961|conserved	22.805	22.0576	21.6095	21.2633	21.9559	21.1845	21.7525	21.9821
0.169583	0.156764	MSMEG_1977|MSMEG_1977|alcohol	23.7154	24.2805	23.8864	25.0063	24.3549	24.8908	23.8452	24.4248
0.340709	0.240177	MSMEG_1996|MSMEG_1996|N5,N10-	24.3006	24.8114	24.1599	25.296	24.7869	25.3407	24.6706	24.7305
0.126867	0.0484304	MSMEG_2007|MSMEG_2007|putative	23.7319	23.5683	23.6544	23.17	23.4291	23.5649	23.5568	23.7675
0.090341	0.101789	MSMEG_2010|MSMEG_2010|stress	26.0573	25.8265	26.4305	27.4858	26.6333	26.9826	26.0992	26.492
0.0295557	-0.0394115	MSMEG_2019|MSMEG_2019|short-chain	22.3227	22.305	22.3797	23.6081	23.2291	23.1364	22.0078	22.0846
0.0381365	-0.0460277	MSMEG_2026|MSMEG_2026|short	26.964	26.6211	26.9823	25.3363	26.2783	26.0743	26.7348	26.6323
0.205008	-0.235054	MSMEG_2027|MSMEG_2027|conserved	26.7344	27.1876	27.0591	25.3494	26.0774	26.0556	26.5097	26.7475
0.36949	-0.138031	MSMEG_2029|MSMEG_2029|3-ketoacyl-ACP/CoA	22.8637	22.6252	22.5352	22.4452	22.4331	22.2757	22.3365	22.8718
0.267405	0.190398	MSMEG_2033|MSMEG_2033|oxidoreductase,	26.0042	26.4743	25.9242	26.9825	26.5424	26.9798	26.2155	26.4092
0.304883	0.0956345	MSMEG_2045|MSMEG_2045|monoxygenase|454	23.7624	23.8752	23.7608	24.2156	24.2003	24.0359	23.8848	23.8756
0.234457	-0.202899	MSMEG_2064|MSMEG_2064|two-component	25.4237	25.0624	25.2993	24.0931	24.6003	24.3994	24.8463	25.2208
0.764681	0.410233	MSMEG_2067|MSMEG_2067|methyltransferase	22.1576	22.3188	22.3763	22.5522	22.6636	23.2973	22.1138	22.9712
0.127157	-0.185228	MSMEG_2068|MSMEG_2068|hypothetical	23.9149	23.7645	24.3392	22.1896	23.3661	22.5826	23.8203	23.6983
0.147654	-0.125226	MSMEG_2070|MSMEG_2070|acyl-CoA	23.1967	23.6321	23.164	24.2123	23.2804	23.8529	22.9039	23.667
0.0621743	-0.0373178	MSMEG_2072|MSMEG_2072|3-hydroxy-3-methylglutaryl-CoA	24.0395	24.4193	24.5848	24.8747	24.5404	24.7168	24.3677	24.1443
0.356135	-0.181478	MSMEG_2073|MSMEG_2073|CAIB/BAIF	23.4018	23.4265	23.0708	23.9554	23.2654	23.5791	22.9835	23.3006
0.452007	-0.234322	MSMEG_2074|MSMEG_2074|conserved	23.6264	23.8605	23.3966	24.3613	23.5731	23.8675	23.3491	23.5179
0.131079	-0.173648	MSMEG_2078|MSMEG_2078|antigen	27.273	27.4852	27.082	28.9696	27.2957	28.2803	27.3253	27.2138
1.1	-0.286249	MSMEG_2079|MSMEG_2079|alcohol	25.8612	26.1674	25.7835	26.0263	25.7358	25.9371	25.4554	25.5651
0.160766	-0.09829	MSMEG_2080|MSMEG_2080|putative	26.6767	26.7068	27.1437	26.1897	26.3577	26.3631	26.8834	26.7195
0.28659	-0.217626	MSMEG_2081|MSMEG_2081|putative	26.6421	26.4723	27.0476	25.7152	26.1445	25.9062	26.6063	26.3497
0.620612	-0.23122	MSMEG_2083|MSMEG_2083|inositol	24.4214	24.192	24.1739	23.6009	23.8599	23.8523	23.8056	23.9455
0.744143	0.207671	MSMEG_2086|prfB|peptide	26.8221	27.1278	26.7563	27.0706	27.2099	27.3886	26.8987	27.1103
0.289414	0.136531	MSMEG_2092|MSMEG_2092|D-aminopeptidase|367	26.0742	25.8077	26.0175	25.2499	25.8283	25.8826	26.091	25.8936
0.108437	-0.191694	MSMEG_2111|MSMEG_2111|chorismate	28.5038	28.0959	28.3377	26.0249	27.4911	26.7117	27.9396	28.0531
0.517602	0.227631	MSMEG_2112|MSMEG_2112|secreted	24.3949	24.3939	24.2271	24.0627	24.2683	25.0535	24.3214	24.3459
0.0626113	0.0588217	MSMEG_2115|MSMEG_2115|conserved	26.3283	26.1909	26.2399	24.9921	25.9547	26.2076	26.1002	25.724
0.0347548	-0.0241337	MSMEG_2117|MSMEG_2117|beta-glucoside-specific	27.0091	26.7854	26.6078	25.9542	26.5539	26.3583	26.626	26.7218
0.0633953	0.0347171	MSMEG_2118|nagB|glucosamine-6-phosphate	24.7247	24.8334	24.5081	25.1077	24.8978	25.2213	24.5765	24.6172
0.366833	-0.137394	MSMEG_2119|nagA|N-acetylglucosamine-6-phosphate	23.2924	23.4094	22.9962	23.4312	23.1759	23.4266	22.8061	23.171
0.0049873	-0.0051651	MSMEG_2122|MSMEG_2122|dihydroxyacetone	24.5841	23.9036	25.009	23.7355	24.2356	23.8692	24.729	24.3778
0.183039	0.0399451	MSMEG_2127|MSMEG_2127|conserved	21.5598	21.7509	21.8158	21.5568	21.7487	21.7367	21.5556	21.8022
0.336396	-0.14868	MSMEG_2132|MSMEG_2132|acyl	22.4941	22.424	21.9325	22.0014	21.8509	21.8627	22.2071	22.3366
0.0263416	-0.00742149	MSMEG_2136|pgm|phosphoglucomutase,	24.7219	24.9136	24.9292	24.8539	24.9378	25.0234	24.7846	24.643
0.183391	-0.103893	MSMEG_2163|MSMEG_2163|aldehyde	22.9466	22.622	22.4044	22.8875	22.5347	23.121	22.2523	22.5369
0.189764	-0.166923	MSMEG_2164|MSMEG_2164|transcriptional	23.0284	22.206	22.3264	21.4625	22.0883	21.7466	22.1559	22.3647
0.348553	-0.340581	MSMEG_2174|MSMEG_2174|superfamily	22.243	22.4578	22.4381	20.7714	21.4099	21.5423	21.9289	21.667
0.112837	0.143172	MSMEG_2189|atzF|allophanate	23.0124	23.7018	22.8835	24.495	23.4385	24.151	22.9504	24.1256
2.58719	0.490072	MSMEG_2192|MSMEG_2192|conserved	22.9873	23.2286	23.2373	23.1591	23.7125	23.7754	23.6744	23.4103
0.0274159	0.0393476	MSMEG_2201|MSMEG_2201|ZbpA	25.9294	26.1761	25.4906	27.2555	26.2538	27.1197	25.6165	26.019
0.421828	0.297607	MSMEG_2205|MSMEG_2205|putative	23.4415	23.7361	23.3504	24.4179	24.1607	24.5342	23.6377	23.8039
0.089986	0.138586	MSMEG_2207|MSMEG_2207|beta-ketothiolase|407	22.5888	22.6933	22.8797	24.6964	23.2943	24.098	23.0337	22.9866
0.384606	-0.181808	MSMEG_2224|MSMEG_2224|acetyl-CoA	22.5409	22.7486	22.9361	23.1835	22.5225	23.076	22.3577	22.7256
0.0740136	-0.0359411	MSMEG_2249|MSMEG_2249|conserved	24.1492	24.5194	23.9546	24.2416	24.1601	24.5394	23.935	24.0865
0.178851	-0.134212	MSMEG_2261|MSMEG_2261|hypothetical	23.9438	24.1889	23.6656	22.9903	23.9178	23.6356	23.3351	23.3632
0.101908	-0.0463948	MSMEG_2263|hybC|hydrogenase-2,	22.787	22.9157	22.7298	23.1574	23.1566	22.9827	22.5289	22.7363
0.0173707	0.0145402	MSMEG_2274|hypC|hydrogenase	24.4442	25.1448	24.2952	24.348	24.5991	24.6272	24.0378	25.0263
0.326771	-0.240154	MSMEG_2276|hypE|hydrogenase	23.0536	22.972	23.071	22.0153	22.3933	22.112	22.7106	22.9353
[truncated: 932 more rows]

## Sheet: Str 15hr
			Drug-free control replicates			Drug-treated replicates				Proteins exclusively absent in drug-treated samples	Proteins exclusively present in drug-treated samples
[truncated: 1,330 more rows]

[truncated: 1 more sheets: Str 25hr]
