# Supplementary material for: ATP burst is the dominant driver of antibiotic lethality in Mycobacterium smegmatis
Source: eLife. 2026 Jan 13;13:RP99656. doi: 10.7554/eLife.99656 (PMC12799214; doi:10.7554/eLife.99656)
Supplement: Figure 9—source data 1. [file elife-99656-fig9-data1.xlsx]

## Sheet: Sheet1
Leucine	Formula	C6H13NO2
	Tgt RT	2.4	minutes
	RT tolerance	0.2	minutes
	m/z tolerance	15	ppm
	Abundance metric	EicCoreArea	(20.0 % threshold)
					Ion Abundance								Corrected Abundance Percentages								Summary Statistics
					m+0	m+1	m+2	m+3	m+4	m+5	m+6	Abund	m+0	m+1	m+2	m+3	m+4	m+5	m+6	Abund	%	%	% Fractional
	SampleGroups	Cpd. Group	File Name	RT	130.087	131.091	132.094	133.097	134.101	135.104	136.107	Sum	130.087	131.091	132.094	133.097	134.101	135.104	136.107	Sum	Unlabeled	Labeled	Labeling
no drug-R1-25hr		6	surrey_64.d	2.399	120683	46290	121568	32491	40717	6506	6149	374403	34.02	10.1	33.98	7.24	11.43	1.47	1.77	100	34.02	65.98	27.24
no drug-R2-25hr		6	surrey_65.d	2.398	117830	44043	121463	32417	44678	6011	5101	371543	33.46	9.59	34.24	7.23	12.7	1.31	1.46	100	33.46	66.54	27.65
no drug-R3-25hr		6	surrey_66.d	2.399	133846	48101	132381	35814	50244	7390	7841	415617	33.98	9.27	33.34	7.15	12.77	1.46	2.03	100	33.98	66.02	28
1/4 NOR-R1-25hr		6	surrey_67.d	2.396	141675	50687	129823	33258	42930	7990	6077	412440	36.28	9.89	32.94	6.65	10.94	1.72	1.58	100	36.28	63.72	26.25
1/4 NOR-R2-25hr		6	surrey_68.d	2.412	115201	46507	114463	31111	38068	5320	5391	356061	34.15	10.85	33.59	7.33	11.24	1.21	1.63	100	34.15	65.85	26.8
1/4 NOR-R3-25hr		6	surrey_69.d	2.411	146402	55753	131466	35499	42106	6015	4531	421772	36.68	10.87	32.56	7.07	10.49	1.19	1.14	100	36.68	63.32	25.32
1/4 STR-R1-25hr		6	surrey_70.d	2.412	187650	57953	151211	32542	44354	5878	4854	484443	41.01	9.23	32.77	5.26	9.67	0.99	1.07	100	41.01	58.99	23.43
1/4 STR-R2-25hr		6	surrey_71.d	2.409	143351	46442	121250	25123	35832	4702	3293	379992	39.93	9.57	33.51	5.09	9.97	1.01	0.91	100	39.93	60.07	23.72
1/4 STR-R3-25hr		6	surrey_72.d	2.407	131848	42697	112262	23278	35608	3049	3880	352621	39.57	9.47	33.43	5.05	10.73	0.56	1.18	100	39.57	60.43	24.05
pyruvate	Formula	C3H4O3
	Tgt RT	3.188	minutes
	RT tolerance	0.2	minutes
	m/z tolerance	15	ppm
	Abundance metric	EicCoreArea	(20.0 % threshold)
					Ion Abundance					Corrected Abundance Percentages					Summary Statistics
					m+0	m+1	m+2	m+3	Abund	m+0	m+1	m+2	m+3	Abund	%	%	% Fractional
	SampleGroups	Cpd. Group	File Name	RT	87.0088	88.0121	89.0155	90.0188	Sum	87.0088	88.0121	89.0155	90.0188	Sum	Unlabeled	Labeled	Labeling
no drug-R1-25hr		10	surrey_64.d	3.293	233138	66490	70909	116297	486835	48.98	12.18	13.87	24.97	100	48.98	51.02	38.28
no drug-R2-25hr		10	surrey_65.d	3.325	269328	86435	69731	121786	547281	50.36	14.4	11.96	23.28	100	50.36	49.64	36.05
no drug-R3-25hr		10	surrey_66.d	3.309	155321	52067	45186	67353	319927	49.68	14.89	13.44	21.99	100	49.68	50.32	35.91
1/4 NOR-R1-25hr		10	surrey_67.d	3.323	183731	56797	46194	84023	370746	50.72	13.9	11.67	23.72	100	50.72	49.28	36.13
1/4 NOR-R2-25hr		10	surrey_68.d	3.323	117638	32842	38405	58460	247345	48.64	11.77	14.89	24.69	100	48.64	51.36	38.54
1/4 NOR-R3-25hr		10	surrey_69.d	3.322	123752	30432	33774	75033	262992	48.09	10.07	11.96	29.88	100	48.09	51.91	41.21
1/4 STR-R1-25hr		10	surrey_70.d	3.273	216722	28162	19434	43572	307891	72.6	6.93	5.55	14.92	100	72.6	27.4	20.93
1/4 STR-R3-25hr		10	surrey_72.d	3.334	69427	13594	10927	17653	111600	63.99	10.29	9.12	16.6	100	63.99	36.01	26.11
Valine	Formula	C5H11NO2
	Tgt RT	3.42	minutes
	RT tolerance	0.2	minutes
	m/z tolerance	15	ppm
	Abundance metric	EicCoreArea	(20.0 % threshold)
					Ion Abundance							Corrected Abundance Percentages							Summary Statistics
					m+0	m+1	m+2	m+3	m+4	m+5	Abund	m+0	m+1	m+2	m+3	m+4	m+5	Abund	%	%	% Fractional
	SampleGroups	Cpd. Group	File Name	RT	116.072	117.075	118.078	119.082	120.085	121.088	Sum	116.072	117.075	118.078	119.082	120.085	121.088	Sum	Unlabeled	Labeled	Labeling
no drug-R1-25hr		12	surrey_64.d	3.425	1159436	320393	488015	399172	105136	141429	2613581	46.46	9.81	18.76	15.57	3.58	5.83	100	46.46	53.54	27.5
no drug-R2-25hr		12	surrey_65.d	3.408	1219990	349808	545847	462537	118351	163165	2859696	44.64	9.87	19.17	16.51	3.66	6.15	100	44.64	55.36	28.62
no drug-R3-25hr		12	surrey_66.d	3.409	1165399	352928	552361	454444	125684	173044	2823860	43.16	10.23	19.66	16.38	3.97	6.61	100	43.16	56.84	29.52
1/4 NOR-R1-25hr		12	surrey_67.d	3.423	808841	220124	340183	285129	70642	97508	1822427	46.48	9.62	18.75	15.98	3.41	5.77	100	46.48	53.52	27.5
1/4 NOR-R2-25hr		12	surrey_68.d	3.422	725737	196145	305576	255396	66920	90992	1640766	46.31	9.5	18.71	15.88	3.62	5.98	100	46.31	53.69	27.79
1/4 NOR-R3-25hr		12	surrey_69.d	3.421	683585	185471	284406	229954	56926	82952	1523293	47	9.69	18.77	15.39	3.27	5.88	100	47	53	27.17
1/4 STR-R1-25hr		12	surrey_70.d	3.422	462937	118923	169852	141144	32294	47342	972493	49.92	9.61	17.5	14.84	2.87	5.26	100	49.92	50.08	25.38
1/4 STR-R2-25hr		12	surrey_71.d	3.419	360217	93390	147865	119510	27698	40018	788698	47.86	9.29	18.87	15.47	3.04	5.47	100	47.86	52.14	26.59
1/4 STR-R3-25hr		12	surrey_72.d	3.417	329787	89952	131943	112438	26758	38541	729418	47.36	9.85	18.13	15.76	3.2	5.7	100	47.36	52.64	26.94
glycine	Formula	C2H5NO2
	Tgt RT	5	minutes
	RT tolerance	0.2	minutes
	m/z tolerance	15	ppm
	Abundance metric	EicCoreArea	(20.0 % threshold)
					Ion Abundance				Corrected Abundance Percentages				Summary Statistics
					m+0	m+1	m+2	Abund	m+0	m+1	m+2	Abund	%	%	% Fractional
	SampleGroups	Cpd. Group	File Name	RT	74.0247	75.0281	76.0315	Sum	74.0247	75.0281	76.0315	Sum	Unlabeled	Labeled	Labeling
no drug-R1-25hr		13	surrey_64.d	5.081	192926	25304	37209	255438	77.35	7.89	14.76	100	77.35	22.65	18.71
no drug-R2-25hr		13	surrey_65.d	5.064	182148	24363	33301	239812	77.8	8.16	14.05	100	77.8	22.2	18.13
no drug-R3-25hr		13	surrey_66.d	5.064	200981	33610	42170	276760	74.3	10.27	15.43	100	74.3	25.7	20.57
1/4 NOR-R1-25hr		13	surrey_67.d	5.078	196280	25583	33691	255553	78.69	8	13.32	100	78.69	21.31	17.31
1/4 NOR-R2-25hr		13	surrey_68.d	5.078	157307	18680	26431	202418	79.64	7.16	13.2	100	79.64	20.36	16.78
1/4 NOR-R3-25hr		13	surrey_69.d	5.077	167411	22376	28803	218590	78.46	8.24	13.31	100	78.46	21.54	17.42
1/4 STR-R1-25hr		13	surrey_70.d	5.077	101223	17571	16920	135713	76.36	11.11	12.52	100	76.36	23.64	18.08
1/4 STR-R2-25hr		13	surrey_71.d	5.075	77570	16509	15733	109813	72.23	13.33	14.44	100	72.23	27.77	21.1
1/4 STR-R3-25hr		13	surrey_72.d	5.072	115073	22390	22950	160414	73.38	12.19	14.43	100	73.38	26.62	20.53
Arginine	Formula	C6H14N4O2
	Tgt RT	5.5	minutes
	RT tolerance	0.2	minutes
	m/z tolerance	15	ppm
	Abundance metric	EicCoreArea	(20.0 % threshold)
					Ion Abundance								Corrected Abundance Percentages								Summary Statistics
					m+0	m+1	m+2	m+3	m+4	m+5	m+6	Abund	m+0	m+1	m+2	m+3	m+4	m+5	m+6	Abund	%	%	% Fractional
	SampleGroups	Cpd. Group	File Name	RT	173.104	174.108	175.111	176.114	177.118	178.121	179.125	Sum	173.104	174.108	175.111	176.114	177.118	178.121	179.125	Sum	Unlabeled	Labeled	Labeling
	no drug-R1-25hr	16	surrey_64.d	5.627	0	10214	12380	0	0	0	0	22594	0	45.97	54.03	0	0	0	0	100	0	100	25.67
	no drug-R2-25hr	16	surrey_65.d	5.56	0	0	0	4163	4128	0	0	8291	0	0	0	50.31	49.69	0	0	100	0	100	58.28
	no drug-R3-25hr	16	surrey_66.d	5.561	0	0	0	3450	0	0	0	3450	0	0	0	100	0	0	0	100	0	100	50
	1/4 NOR-R1-25hr	16	surrey_67.d	5.591	15030	0	0	0	0	0	0	15030	100	0	0	0	0	0	0	100	100	0	0
	1/4 NOR-R2-25hr	16	surrey_68.d	5.607	23165	0	0	2986	0	0	0	26151	88.26	0	0	11.74	0	0	0	100	88.26	11.74	5.87
	1/4 NOR-R3-25hr	16	surrey_69.d	5.573	16081	0	0	0	1658	0	0	17739	90.26	0	0	0	9.74	0	0	100	90.26	9.74	6.49
	1/4 STR-R2-25hr	16	surrey_71.d	5.621	12064	0	0	0	1152	0	0	13216	90.92	0	0	0	9.08	0	0	100	90.92	9.08	6.06
	1/4 STR-R3-25hr	16	surrey_72.d	5.586	0	0	0	2718	0	0	0	2718	0	0	0	100	0	0	0	100	0	100	50
Glutamine	Formula	C5H10N2O3
	Tgt RT	5.9	minutes
	RT tolerance	0.2	minutes
	m/z tolerance	15	ppm
	Abundance metric	EicCoreArea	(20.0 % threshold)
					Ion Abundance							Corrected Abundance Percentages							Summary Statistics
					m+0	m+1	m+2	m+3	m+4	m+5	Abund	m+0	m+1	m+2	m+3	m+4	m+5	Abund	%	%	% Fractional
	SampleGroups	Cpd. Group	File Name	RT	145.062	146.065	147.069	148.072	149.075	150.079	Sum	145.062	146.065	147.069	148.072	149.075	150.079	Sum	Unlabeled	Labeled	Labeling
	no drug-R1-25hr	18	surrey_64.d	5.909	13022600	2542458	3045018	870532	385734	81213	19947558	69.42	8.94	15.41	3.96	1.88	0.39	100	69.42	30.58	12.22
	no drug-R2-25hr	18	surrey_65.d	5.908	13307920	2701128	3260680	929096	425634	91100	20715559	68.29	9.31	15.91	4.06	2.01	0.42	100	68.29	31.71	12.69
	no drug-R3-25hr	18	surrey_66.d	5.909	14912300	2962951	3656836	1073998	505882	109015	23220977	68.26	9.01	15.93	4.21	2.14	0.45	100	68.26	31.74	12.86
	1/4 NOR-R1-25hr	18	surrey_67.d	5.906	15444900	2886689	3320551	905280	398235	80197	23035848	71.34	8.61	14.51	3.53	1.68	0.33	100	71.34	28.66	11.32
	1/4 NOR-R2-25hr	18	surrey_68.d	5.922	12054650	2334849	2675161	725039	319075	66377	18175153	70.56	8.99	14.83	3.58	1.71	0.35	100	70.56	29.44	11.58
	1/4 NOR-R3-25hr	18	surrey_69.d	5.904	14180230	2666689	2975733	769271	340078	71930	21003932	71.85	8.76	14.24	3.25	1.57	0.32	100	71.85	28.15	10.98
	1/4 STR-R1-25hr	18	surrey_70.d	5.922	11673320	3116543	3332094	940170	376413	73881	19512425	63.52	12.73	17.2	4.35	1.85	0.35	100	63.52	36.48	13.87
	1/4 STR-R2-25hr	18	surrey_71.d	5.919	8659879	2128885	2263733	616586	253662	48268	13971013	65.86	11.82	16.3	3.96	1.75	0.32	100	65.86	34.14	12.98
	1/4 STR-R3-25hr	18	surrey_72.d	5.917	7447337	1844009	2017499	560516	232938	45101	12147401	65.12	11.79	16.74	4.15	1.85	0.34	100	65.12	34.88	13.37
Serine	Formula	C3H7NO3
	Tgt RT	5.9	minutes
	RT tolerance	0.2	minutes
	m/z tolerance	15	ppm
	Abundance metric	EicCoreArea	(20.0 % threshold)
					Ion Abundance					Corrected Abundance Percentages					Summary Statistics
					m+0	m+1	m+2	m+3	Abund	m+0	m+1	m+2	m+3	Abund	%	%	% Fractional
	SampleGroups	Cpd. Group	File Name	RT	104.035	105.039	106.042	107.045	Sum	104.035	105.039	106.042	107.045	Sum	Unlabeled	Labeled	Labeling
	no drug-R1-25hr	20	surrey_64.d	5.991	295473	106419	89804	219278	710975	42.49	13.63	11.58	32.3	100	42.49	57.51	44.56
	no drug-R2-25hr	20	surrey_65.d	5.974	325656	125690	110067	245988	807401	41.22	14.28	12.63	31.87	100	41.22	58.78	45.05
	no drug-R3-25hr	20	surrey_66.d	5.991	279591	109458	91760	199084	679894	42.05	14.81	12.51	30.64	100	42.05	57.95	43.91
	1/4 NOR-R1-25hr	20	surrey_67.d	5.989	215123	84143	66466	155193	520925	42.22	14.87	11.72	31.19	100	42.22	57.78	43.96
	1/4 NOR-R2-25hr	20	surrey_68.d	5.988	145497	62320	43152	110374	361343	41.14	16.06	10.81	31.98	100	41.14	58.86	44.54
	1/4 NOR-R3-25hr	20	surrey_69.d	5.987	171159	65290	57158	121789	415396	42.13	14.4	12.79	30.67	100	42.13	57.87	44
	1/4 STR-R1-25hr	20	surrey_70.d	6.005	172109	68310	54009	134990	429418	40.95	14.66	11.48	32.91	100	40.95	59.05	45.45
	1/4 STR-R2-25hr	20	surrey_71.d	6.002	146963	58581	46937	117054	369535	40.63	14.61	11.61	33.15	100	40.63	59.37	45.76
	1/4 STR-R3-25hr	20	surrey_72.d	6	128463	49530	43755	101478	323226	40.6	14.05	12.5	32.85	100	40.6	59.4	45.86
Citrulline	Formula	C6H13N3O3
	Tgt RT	6.99	minutes
	RT tolerance	0.2	minutes
	m/z tolerance	15	ppm
	Abundance metric	EicCoreArea	(20.0 % threshold)
					Ion Abundance								Corrected Abundance Percentages								Summary Statistics
					m+0	m+1	m+2	m+3	m+4	m+5	m+6	Abund	m+0	m+1	m+2	m+3	m+4	m+5	m+6	Abund	%	%	% Fractional
	SampleGroups	Cpd. Group	File Name	RT	174.088	175.092	176.095	177.098	178.102	179.105	180.109	Sum	174.088	175.092	176.095	177.098	178.102	179.105	180.109	Sum	Unlabeled	Labeled	Labeling
	no drug-R1-25hr	22	surrey_64.d	7.001	7839344	3554650	2139559	947245	341056	104746	13886	14940485	56.39	21.17	13.61	5.96	2.13	0.66	0.07	100	56.39	43.61	13.09
	no drug-R2-25hr	22	surrey_65.d	7.001	8513453	3976473	2491000	1103634	397026	125383	14675	16621643	55.02	21.4	14.32	6.25	2.23	0.72	0.07	100	55.02	44.98	13.61
	no drug-R3-25hr	22	surrey_66.d	7.001	8634701	4108597	2611608	1170505	440338	138287	18757	17122791	54.15	21.53	14.6	6.44	2.42	0.77	0.09	100	54.15	45.85	14.02
	1/4 NOR-R1-25hr	22	surrey_67.d	6.999	4467853	1974496	1141084	498827	172834	51809	7687	8314589	57.78	21.03	12.96	5.63	1.93	0.59	0.08	100	57.78	42.22	12.49
	1/4 NOR-R2-25hr	22	surrey_68.d	6.998	4399564	1845005	1088026	457157	162321	50428	7154	8009654	59.09	20.16	12.87	5.32	1.89	0.6	0.07	100	59.09	40.91	12.14
	1/4 NOR-R3-25hr	22	surrey_69.d	6.997	3810552	1600623	915883	377221	136832	41387	6159	6888656	59.51	20.36	12.54	5.09	1.86	0.57	0.07	100	59.51	40.49	11.9
	1/4 STR-R1-25hr	22	surrey_70.d	6.998	2590986	1178559	835301	339017	116509	30466	3767	5094605	54.63	20.54	15.93	6.18	2.11	0.55	0.05	100	54.63	45.37	13.74
	1/4 STR-R2-25hr	22	surrey_71.d	6.995	2458917	1033874	722168	284795	100828	27623	2680	4630886	57.09	19.49	15.13	5.68	2.02	0.55	0.04	100	57.09	42.91	12.98
	1/4 STR-R3-25hr	22	surrey_72.d	7.009	2073901	888524	625222	252940	89175	25915	3390	3959067	56.3	19.67	15.33	5.93	2.09	0.61	0.07	100	56.3	43.7	13.32
Aspartate	Formula	C4H7NO4
	Tgt RT	7.6	minutes
	RT tolerance	0.2	minutes
	m/z tolerance	15	ppm
	Abundance metric	EicCoreArea	(20.0 % threshold)
					Ion Abundance						Corrected Abundance Percentages						Summary Statistics
					m+0	m+1	m+2	m+3	m+4	Abund	m+0	m+1	m+2	m+3	m+4	Abund	%	%	% Fractional
	SampleGroups	Cpd. Group	File Name	RT	132.03	133.034	134.037	135.04	136.044	Sum	132.03	133.034	134.037	135.04	136.044	Sum	Unlabeled	Labeled	Labeling
	no drug-R1-25hr	24	surrey_64.d	7.664	2725614	859316	703542	354967	94107	4737545	60.22	15.94	14.48	7.45	1.91	100	60.22	39.78	18.72
	no drug-R2-25hr	24	surrey_65.d	7.646	3386706	1043007	914376	425491	119241	5888821	60.2	15.47	15.23	7.14	1.95	100	60.2	39.8	18.79
	no drug-R3-25hr	24	surrey_66.d	7.647	2541330	822988	702123	375032	105738	4547211	58.46	15.96	15.1	8.23	2.26	100	58.46	41.54	19.97
	1/4 NOR-R1-25hr	24	surrey_67.d	7.661	2636806	757291	644145	297296	80409	4415947	62.55	14.79	14.26	6.65	1.75	100	62.55	37.45	17.56
	1/4 NOR-R2-25hr	24	surrey_68.d	7.66	2414805	709969	599060	254746	71916	4050496	62.46	15.2	14.48	6.17	1.7	100	62.46	37.54	17.36
	1/4 NOR-R3-25hr	24	surrey_69.d	7.643	2522513	737253	612901	266569	70219	4209456	62.79	15.17	14.23	6.23	1.59	100	62.79	37.21	17.16
	1/4 STR-R1-25hr	24	surrey_70.d	7.66	2466863	980346	752697	292014	75806	4567726	56.48	19.61	16.15	6.2	1.56	100	56.48	43.52	19.19
	1/4 STR-R2-25hr	24	surrey_71.d	7.658	2455969	914081	716747	281145	72064	4440005	57.87	18.63	15.83	6.15	1.52	100	57.87	42.13	18.7
	1/4 STR-R3-25hr	24	surrey_72.d	7.655	1305741	489481	402477	154530	39293	2391522	57.11	18.52	16.56	6.27	1.54	100	57.11	42.89	19.15
GABA	Formula	C4H9NO2
	Tgt RT	7.8	minutes
	RT tolerance	0.2	minutes
	m/z tolerance	15	ppm
	Abundance metric	EicCoreArea	(20.0 % threshold)
					Ion Abundance						Corrected Abundance Percentages						Summary Statistics
					m+0	m+1	m+2	m+3	m+4	Abund	m+0	m+1	m+2	m+3	m+4	Abund	%	%	% Fractional
	SampleGroups	Cpd. Group	File Name	RT	102.056	103.059	104.063	105.066	106.069	Sum	102.056	103.059	104.063	105.066	106.069	Sum	Unlabeled	Labeled	Labeling
	no drug-R1-25hr	25	surrey_64.d	7.813	5931305	1832653	890716	327555	53475	9035704	68.62	17.91	9.39	3.54	0.54	100	68.62	31.38	12.37
	no drug-R2-25hr	25	surrey_65.d	7.812	6362902	2020819	990502	364103	66056	9804381	67.83	18.29	9.64	3.62	0.63	100	67.83	32.17	12.73
	no drug-R3-25hr	25	surrey_66.d	7.813	6492231	2131302	1087667	400219	68406	10179825	66.63	18.67	10.24	3.83	0.62	100	66.63	33.37	13.29
	1/4 NOR-R1-25hr	25	surrey_67.d	7.81	5229605	1620221	788998	271695	43900	7954419	68.74	17.99	9.46	3.31	0.5	100	68.74	31.26	12.21
	1/4 NOR-R2-25hr	25	surrey_68.d	7.809	4676079	1453410	707155	251575	42564	7130784	68.55	18.02	9.45	3.43	0.55	100	68.55	31.45	12.35
	1/4 NOR-R3-25hr	25	surrey_69.d	7.808	4614975	1408361	680398	231465	38503	6973702	69.2	17.79	9.3	3.21	0.5	100	69.2	30.8	12.01
	1/4 STR-R1-25hr	25	surrey_70.d	7.809	2471482	976104	514652	163656	25626	4151519	62.12	21.57	11.98	3.79	0.55	100	62.12	37.88	14.77
	1/4 STR-R2-25hr	25	surrey_71.d	7.807	2065586	803458	419290	129308	16760	3434402	62.77	21.42	11.79	3.61	0.42	100	62.77	37.23	14.37
	1/4 STR-R3-25hr	25	surrey_72.d	7.821	2063109	799572	393938	132392	17969	3406981	63.21	21.49	11.09	3.75	0.46	100	63.21	36.79	14.19
Glutamate	Formula	C5H9NO4
	Tgt RT	7.8	minutes
	RT tolerance	0.2	minutes
	m/z tolerance	15	ppm
	Abundance metric	EicCoreArea	(20.0 % threshold)
					Ion Abundance							Corrected Abundance Percentages							Summary Statistics
					m+0	m+1	m+2	m+3	m+4	m+5	Abund	m+0	m+1	m+2	m+3	m+4	m+5	Abund	%	%	% Fractional
	SampleGroups	Cpd. Group	File Name	RT	146.046	147.049	148.053	149.056	150.059	151.063	Sum	146.046	147.049	148.053	149.056	150.059	151.063	Sum	Unlabeled	Labeled	Labeling
	no drug-R1-25hr	26	surrey_64.d	7.813	62908270	13314140	16098940	4853910	2283827	461090	99920172	66.8	9.91	16.16	4.47	2.23	0.43	100	66.8	33.2	13.34
	no drug-R2-25hr	26	surrey_65.d	7.812	70416420	14718930	18183910	5607870	2668937	543032	112139095	66.62	9.71	16.28	4.61	2.32	0.45	100	66.62	33.38	13.53
	no drug-R3-25hr	26	surrey_66.d	7.813	71725140	16011420	19645010	5979049	2887247	589415	116837274	65.11	10.4	16.9	4.71	2.41	0.47	100	65.11	34.89	14.07
	1/4 NOR-R1-25hr	26	surrey_67.d	7.81	62591840	13313030	15326940	4403450	1899146	386254	97920659	67.85	10.16	15.66	4.1	1.86	0.37	100	67.85	32.15	12.61
	1/4 NOR-R2-25hr	26	surrey_68.d	7.809	50616100	11276030	13234440	3733846	1638605	319822	80818849	66.46	10.6	16.42	4.2	1.95	0.37	100	66.46	33.54	13.14
	1/4 NOR-R3-25hr	26	surrey_69.d	7.808	52646740	11591780	13037000	3663044	1582038	313737	82834344	67.46	10.6	15.73	4.02	1.83	0.35	100	67.46	32.54	12.64
	1/4 STR-R1-25hr	26	surrey_70.d	7.809	29055130	8569092	9427472	2811114	1098799	204531	51166134	60.15	13.92	18.49	5.04	2.04	0.36	100	60.15	39.85	15.19
	1/4 STR-R2-25hr	26	surrey_71.d	7.807	24934000	7070561	7747666	2152148	857394	162492	42924258	61.56	13.56	18.11	4.54	1.89	0.34	100	61.56	38.44	14.54
	1/4 STR-R3-25hr	26	surrey_72.d	7.821	8205384	2362880	2637335	763754	317229	64006	14350587	60.57	13.6	18.46	4.85	2.11	0.41	100	60.57	39.43	15.11
Succinic acid	Formula	C4H6O4
	Tgt RT	8.9	minutes
	RT tolerance	0.2	minutes
	m/z tolerance	15	ppm
	Abundance metric	EicCoreArea	(20.0 % threshold)
					Ion Abundance						Corrected Abundance Percentages						Summary Statistics
					m+0	m+1	m+2	m+3	m+4	Abund	m+0	m+1	m+2	m+3	m+4	Abund	%	%	% Fractional
	SampleGroups	Cpd. Group	File Name	RT	117.019	118.023	119.026	120.029	121.033	Sum	117.019	118.023	119.026	120.029	121.033	Sum	Unlabeled	Labeled	Labeling
	no drug-R1-25hr	28	surrey_64.d	8.872	2427054	584748	580341	193761	83650	3869554	65.53	12.67	14.82	4.82	2.16	100	65.53	34.47	16.35
	no drug-R2-25hr	28	surrey_65.d	8.855	2790856	667885	656655	222381	100204	4437981	65.71	12.6	14.6	4.82	2.26	100	65.71	34.29	16.33
	no drug-R3-25hr	28	surrey_66.d	8.872	2373586	582335	578872	204027	87170	3825991	64.8	12.82	14.95	5.16	2.28	100	64.8	35.2	16.82
	1/4 NOR-R1-25hr	28	surrey_67.d	8.87	2082816	458603	452091	129593	67102	3190204	68.28	11.8	13.98	3.83	2.12	100	68.28	31.72	14.93
	1/4 NOR-R2-25hr	28	surrey_68.d	8.869	2196369	365686	334242	101097	59343	3056737	75.29	9.01	10.59	3.13	1.98	100	75.29	24.71	11.88
	1/4 NOR-R3-25hr	28	surrey_69.d	8.868	2295291	397485	336168	97574	57168	3183686	75.55	9.56	10.18	2.88	1.83	100	75.55	24.45	11.47
	1/4 STR-R1-25hr	28	surrey_70.d	8.869	1221330	265929	204897	63073	38401	1793629	71.26	12.21	11.03	3.31	2.19	100	71.26	28.74	13.24
	1/4 STR-R2-25hr	28	surrey_71.d	8.85	1032986	160018	110907	31863	21074	1356848	79.87	8.69	7.65	2.18	1.6	100	79.87	20.13	9.23
	1/4 STR-R3-25hr	28	surrey_72.d	8.864	373520	53971	39474	10164	9856	486984	80.48	7.91	7.61	1.89	2.12	100	80.48	19.52	9.31
D-Sedoheptulose 7-phosphate	Formula	C7H15O10P
	Tgt RT	10	minutes
	RT tolerance	0.2	minutes
	m/z tolerance	15	ppm
	Abundance metric	EicCoreArea	(20.0 % threshold)
					Ion Abundance									Corrected Abundance Percentages									Summary Statistics
					m+0	m+1	m+2	m+3	m+4	m+5	m+6	m+7	Abund	m+0	m+1	m+2	m+3	m+4	m+5	m+6	m+7	Abund	%	%	% Fractional
	SampleGroups	Cpd. Group	File Name	RT	289.033	290.036	291.04	292.043	293.046	294.05	295.053	296.056	Sum	289.033	290.036	291.04	292.043	293.046	294.05	295.053	296.056	Sum	Unlabeled	Labeled	Labeling
	no drug-R1-25hr	31	surrey_64.d	9.998	58654	106472	157921	178355	172543	139935	95400	52690	961970	6.37	11.03	16.29	18.31	17.78	14.51	9.97	5.74	100	6.37	93.63	48.88
	no drug-R2-25hr	31	surrey_65.d	9.981	67354	114764	174261	204380	196542	160136	109516	56844	1083797	6.5	10.51	15.95	18.68	17.98	14.73	10.18	5.47	100	6.5	93.5	49.06
	no drug-R3-25hr	31	surrey_66.d	9.998	40486	74601	108529	124105	119716	99559	64834	34572	666402	6.35	11.17	16.14	18.41	17.8	14.96	9.77	5.41	100	6.35	93.65	48.73
	1/4 NOR-R1-25hr	31	surrey_67.d	9.995	56847	97706	139753	166612	152299	137499	86989	48873	886577	6.71	10.96	15.57	18.66	16.89	15.62	9.83	5.76	100	6.71	93.29	49.01
	1/4 NOR-R2-25hr	31	surrey_68.d	9.995	47783	78720	119139	140939	137462	113352	70522	41726	749643	6.67	10.4	15.75	18.62	18.19	15.16	9.36	5.84	100	6.67	93.33	49.05
	1/4 NOR-R3-25hr	31	surrey_69.d	9.994	51872	85558	137565	145822	141884	118422	83167	46564	810855	6.7	10.43	16.94	17.69	17.31	14.58	10.33	6.03	100	6.7	93.3	49.1
	1/4 STR-R1-25hr	31	surrey_70.d	10.011	11900	21128	30833	33947	31973	29532	20649	11241	191202	6.5	10.99	15.99	17.51	16.42	15.51	10.92	6.16	100	6.5	93.5	49.62
	1/4 STR-R2-25hr	31	surrey_71.d	10.009	6678	11021	17321	18881	17520	15976	9062	5427	101884	6.87	10.71	16.95	18.31	16.9	15.89	8.81	5.56	100	6.87	93.13	48.34
	1/4 STR-R3-25hr	31	surrey_72.d	10.006	2517	6592	7577	7936	9686	10664	4499	3009	52479	4.97	12.77	14.15	14.62	18.24	21.1	8.23	5.92	100	4.97	95.03	50.6
D-Fructose 6-phosphate	Formula	C6H13O9P
	Tgt RT	10.3	minutes
	RT tolerance	0.2	minutes
	m/z tolerance	15	ppm
	Abundance metric	EicCoreArea	(20.0 % threshold)
					Ion Abundance								Corrected Abundance Percentages								Summary Statistics
					m+0	m+1	m+2	m+3	m+4	m+5	m+6	Abund	m+0	m+1	m+2	m+3	m+4	m+5	m+6	Abund	%	%	% Fractional
	SampleGroups	Cpd. Group	File Name	RT	259.022	260.026	261.029	262.033	263.036	264.039	265.043	Sum	259.022	260.026	261.029	262.033	263.036	264.039	265.043	Sum	Unlabeled	Labeled	Labeling
	no drug-R1-25hr	32	surrey_64.d	10.329	264433	287796	335573	426616	317274	263693	238104	2133489	12.92	13.12	15.22	20.05	14.57	12.15	11.97	100	12.92	87.08	49.09
	no drug-R2-25hr	32	surrey_65.d	10.328	325106	353087	427277	569250	413686	332095	288316	2708815	12.51	12.67	15.27	21.15	14.97	12.04	11.39	100	12.51	87.49	49.18
	no drug-R3-25hr	32	surrey_66.d	10.329	174912	213864	253634	329226	244247	189510	164198	1569592	11.6	13.35	15.67	21.06	15.3	11.84	11.18	100	11.6	88.4	49.23
	1/4 NOR-R1-25hr	32	surrey_67.d	10.326	187764	180102	212633	268045	203030	168999	176747	1397320	14.02	12.41	14.7	19.21	14.25	11.77	13.64	100	14.02	85.98	49.52
	1/4 NOR-R2-25hr	32	surrey_68.d	10.326	131275	110057	140410	177553	131674	106459	122610	920038	14.9	11.36	14.79	19.36	14.03	11.15	14.41	100	14.9	85.1	49.56
	1/4 NOR-R3-25hr	32	surrey_69.d	10.325	137360	128628	146163	191049	142960	112264	127595	986018	14.54	12.55	14.26	19.44	14.26	10.97	13.99	100	14.54	85.46	49.19
	1/4 STR-R1-25hr	32	surrey_70.d	10.342	50765	62953	70814	87202	68473	54976	51295	446478	11.83	13.84	15.35	19.5	15.09	12.06	12.33	100	11.83	88.17	49.61
	1/4 STR-R2-25hr	32	surrey_71.d	10.323	24194	34513	41079	45877	36200	30741	26470	239074	10.51	14.26	16.78	19.06	14.84	12.71	11.85	100	10.51	89.49	49.83
	1/4 STR-R3-25hr	32	surrey_72.d	10.337	11761	13942	18343	20213	14980	14256	10593	104087	11.77	13.06	17.3	19.35	13.95	13.72	10.86	100	11.77	88.23	49.21
Citric acid	Formula	C6H8O7
	Tgt RT	10.8	minutes
	RT tolerance	0.2	minutes
	m/z tolerance	15	ppm
	Abundance metric	EicCoreArea	(20.0 % threshold)
					Ion Abundance								Corrected Abundance Percentages								Summary Statistics
					m+0	m+1	m+2	m+3	m+4	m+5	m+6	Abund	m+0	m+1	m+2	m+3	m+4	m+5	m+6	Abund	%	%	% Fractional
	SampleGroups	Cpd. Group	File Name	RT	191.02	192.023	193.026	194.03	195.033	196.036	197.04	Sum	191.02	192.023	193.026	194.03	195.033	196.036	197.04	Sum	Unlabeled	Labeled	Labeling
	no drug-R1-25hr	36	surrey_64.d	10.875	660980	157431	144818	62856	33088	12519	4037	1075727	66.08	11.1	12.87	5.5	2.97	1.12	0.36	100	66.08	33.92	12.17
	no drug-R2-25hr	36	surrey_65.d	10.875	626646	150165	150549	71753	39846	13808	4546	1057312	63.68	10.76	13.73	6.48	3.69	1.25	0.41	100	63.68	36.32	13.52
	no drug-R3-25hr	36	surrey_66.d	10.876	572017	120366	107889	53043	29207	12344	2037	896903	68.63	9.63	11.33	5.67	3.18	1.37	0.19	100	68.63	31.37	11.66
	1/4 NOR-R1-25hr	36	surrey_67.d	10.873	614949	162511	171068	77300	44348	15736	2651	1088563	60.65	11.72	15.33	6.72	3.98	1.4	0.19	100	60.65	39.35	14.44
	1/4 NOR-R2-25hr	36	surrey_68.d	10.872	590491	169566	175390	82495	46024	16546	4645	1085159	58.37	12.61	15.78	7.23	4.14	1.47	0.4	100	58.37	41.63	15.36
	1/4 NOR-R3-25hr	36	surrey_69.d	10.871	474908	151059	163457	73266	42101	16680	5013	926484	54.92	13.54	17.38	7.46	4.42	1.76	0.52	100	54.92	45.08	16.71
	1/4 STR-R1-25hr	36	surrey_70.d	10.872	700525	219228	223045	96441	48849	15993	4292	1308371	57.44	13.89	16.71	6.94	3.58	1.15	0.3	100	57.44	42.56	15
	1/4 STR-R2-25hr	36	surrey_71.d	10.869	610378	182610	167151	74011	38012	10824	2758	1085743	60.37	13.81	14.88	6.42	3.38	0.92	0.22	100	60.37	39.63	13.71
	1/4 STR-R3-25hr	36	surrey_72.d	10.884	214871	66981	68766	29682	15316	5552	1534	402702	57.23	13.77	16.74	6.93	3.65	1.32	0.35	100	57.23	42.77	15.23
Acetyl CoA	Formula	C23H38N7O17P3S
	Tgt RT	19.1	minutes
	RT tolerance	0.2	minutes
	m/z tolerance	15	ppm
	Abundance metric	EicCoreArea	(20.0 % threshold)
					Ion Abundance																									Corrected Abundance Percentages
					m+0	m+1	m+2	m+3	m+4	m+5	m+6	m+7	m+8	m+9	m+10	m+11	m+12	m+13	m+14	m+15	m+16	m+17	m+18	m+19	m+20	m+21	m+22	m+23	Abund	m+0	m+1	m+2	m+3	m+4	m+5	m+6	m+7	m+8	m+9	m+10	m+11	m+12	m+13	m+14	m+15	m+16	m+17	m+18	m+19
	SampleGroups	Cpd. Group	File Name	RT	808.119	809.122	810.125	811.129	812.132	813.135	814.139	815.142	816.145	817.149	818.152	819.155	820.159	821.162	822.165	823.169	824.172	825.176	826.179	827.182	828.186	829.189	830.192	831.196	Sum	808.119	809.122	810.125	811.129	812.132	813.135	814.139	815.142	816.145	817.149	818.152	819.155	820.159	821.162	822.165	823.169	824.172	825.176	826.179	827.182
		40	surrey_55.d	19.068	3094	0	3191	0	0	2483	0	1813	0	0	0	0	0	0	0	1549	0	0	0	0	0	0	0	0	12130	25.41	0	23.57	0	0	21.35	0	14.03	0	0	0	0	0	0	0	15.63	0	0	0	0
		40	surrey_56.d	19.067	2602	4531	2656	0	1940	2670	0	0	0	0	0	0	0	0	0	0	0	0	0	0	2554	0	0	0	16953	18.09	26.28	7.67	0	11.48	14.85	0	0	0	0	0	0	0	0	0	0	0	0	0	0
		40	surrey_57.d	19.05	0	3683	0	0	0	0	0	0	0	0	0	0	0	0	0	0	0	0	0	0	0	1411	0	0	5094	0	66.36	0	0	0	0	0	0	0	0	0	0	0	0	0	0	0	0	0	0
		40	surrey_58.d	19.069	2274	3179	0	0	1565	0	0	0	0	0	0	0	0	0	0	0	0	0	0	0	0	0	0	0	7018	37.51	38.08	0	0	24.41	0	0	0	0	0	0	0	0	0	0	0	0	0	0	0
		40	surrey_59.d	19.081	2403	0	0	4146	0	0	0	2420	0	3050	0	0	0	0	0	1542	0	0	0	0	0	965	0	0	14526	15.19	0	0	27.06	0	0	0	17.04	0	20.37	0	0	0	0	0	12.15	0	0	0	0
		40	surrey_60.d	19.081	0	3915	0	0	0	1852	0	0	0	0	0	0	0	0	0	0	0	0	0	0	0	0	0	0	5767	0	66.73	0	0	0	33.27	0	0	0	0	0	0	0	0	0	0	0	0	0	0
		40	surrey_61.d	19.063	0	5292	0	3645	0	2386	0	0	908	2675	0	0	0	1428	0	0	0	0	0	0	0	0	0	0	16334	0	33.71	0	19.92	0	13.54	0	0	4.57	17.59	0	0	0	10.66	0	0	0	0	0	0
		40	surrey_62.d	19.062	2240	0	0	0	0	0	0	0	0	0	0	2205	0	1053	0	0	0	0	0	0	0	0	0	0	5499	38	0	0	0	0	0	0	0	0	0	0	44.53	0	17.47	0	0	0	0	0	0
		40	surrey_63.d	19.063	2298	4265	0	4750	2079	2515	0	1230	0	0	0	1914	0	0	0	0	0	0	0	0	0	0	0	0	19051	14.3	21.25	0	28.43	5	11.25	0	6.55	0	0	0	13.22	0	0	0	0	0	0	0	0
		40	surrey_64.d	19.054	0	3102	0	3122	0	1979	0	0	0	0	0	0	0	0	0	0	0	0	0	0	0	0	0	0	8203	0	40.33	0	37.05	0	22.62	0	0	0	0	0	0	0	0	0	0	0	0	0	0
		40	surrey_65.d	19.07	0	3559	0	3461	0	0	0	0	0	0	0	0	1342	0	0	0	0	0	0	0	0	0	0	0	8362	0	43.31	0	37.71	0	0	0	0	0	0	0	0	18.98	0	0	0	0	0	0	0
		40	surrey_66.d	19.071	3925	4639	0	3876	1910	0	0	0	0	0	0	0	0	0	0	0	0	0	0	0	0	0	0	0	14351	34.17	28.09	0	30.67	7.07	0	0	0	0	0	0	0	0	0	0	0	0	0	0	0
		40	surrey_67.d	19.068	0	0	0	0	0	0	0	2597	883	3409	0	0	0	0	0	0	0	0	0	0	0	0	0	0	6888	0	0	0	0	0	0	0	46.4	0.22	53.39	0	0	0	0	0	0	0	0	0	0
		40	surrey_68.d	19.067	0	4300	0	2259	0	1876	0	0	0	0	0	0	0	1259	0	873	0	0	0	0	0	0	0	0	10567	0	41.88	0	17.7	0	16.97	0	0	0	0	0	0	0	14.49	0	8.96	0	0	0	0
		40	surrey_69.d	19.066	2551	0	2719	2285	0	0	0	1385	0	0	0	1372	0	0	0	0	0	0	0	0	0	0	0	0	10312	26.02	0	26.66	15.66	0	0	0	15.42	0	0	0	16.24	0	0	0	0	0	0	0	0
		40	surrey_70.d	19.051	0	2735	2781	2588	1629	0	0	0	0	0	0	0	0	0	0	0	0	0	0	0	0	0	0	0	9734	0	37.62	27.73	23.73	10.91	0	0	0	0	0	0	0	0	0	0	0	0	0	0	0
		40	surrey_71.d	19.048	0	0	0	0	0	1805	0	0	0	0	0	0	0	0	0	0	0	0	0	0	0	0	0	0	1805	0	0	0	0	0	100	0	0	0	0	0	0	0	0	0	0	0	0	0	0
		40	surrey_73.d	19.073	0	4717	0	0	1403	0	0	0	0	0	0	0	0	0	0	0	0	0	0	0	0	0	0	0	6121	0	77.76	0	0	22.24	0	0	0	0	0	0	0	0	0	0	0	0	0	0	0
		40	surrey_74.d	19.053	1798	0	1243	0	0	0	0	0	0	2207	0	0	0	0	0	0	0	0	0	0	0	0	0	0	5248	33.65	0	19.59	0	0	0	0	0	0	46.76	0	0	0	0	0	0	0	0	0	0
		40	surrey_75.d	19.052	0	0	0	2988	902	0	0	0	0	0	0	0	0	0	0	0	0	0	0	0	0	0	0	0	3890	0	0	0	98.86	1.14	0	0	0	0	0	0	0	0	0	0	0	0	0	0	0
		40	surrey_76.d	19.053	0	4012	0	3526	0	0	0	0	0	2031	0	0	0	0	0	1248	0	0	0	0	0	0	0	0	10817	0	36.81	0	28.56	0	0	0	0	0	20.77	0	0	0	0	0	13.87	0	0	0	0
		40	surrey_77.d	19.082	0	3198	0	4005	0	0	0	1777	850	0	0	0	0	1307	0	0	0	0	0	0	0	0	0	0	11137	0	29.45	0	34.01	0	0	0	18.04	4.32	0	0	0	0	14.18	0	0	0	0	0	0
		40	surrey_78.d	19.081	0	0	0	3729	0	2720	0	0	0	0	0	1536	0	0	0	0	0	0	0	0	0	0	0	0	7985	0	0	0	47.88	0	30.17	0	0	0	0	0	21.95	0	0	0	0	0	0	0	0
		40	surrey_79.d	19.067	0	0	0	0	0	0	0	815	0	0	0	1972	0	0	0	0	0	0	0	0	0	0	0	0	2787	0	0	0	0	0	0	0	28.09	0	0	0	71.91	0	0	0	0	0	0	0	0
		40	surrey_80.d	19.064	0	0	0	4293	1006	2540	0	0	0	0	0	1493	0	0	0	0	0	0	0	0	0	0	0	0	9332	0	0	0	54.95	0	25.01	0	0	0	0	0	20.04	0	0	0	0	0	0	0	0
		40	surrey_81.d	19.063	1665	4433	1769	0	0	2151	0	0	0	0	0	0	0	0	0	0	0	0	0	0	0	0	0	0	10018	20.54	49.61	3.66	0	0	26.18	0	0	0	0	0	0	0	0	0	0	0	0	0	0
		40	surrey_82.d	19.071	0	0	0	0	0	0	0	1842	0	0	0	0	0	0	0	0	0	0	0	0	0	0	0	0	1842	0	0	0	0	0	0	0	100	0	0	0	0	0	0	0	0	0	0	0	0
		40	surrey_83.d	19.07	0	0	0	3814	0	2362	0	0	0	0	0	0	0	0	0	0	0	0	0	0	0	0	0	0	6176	0	0	0	65.88	0	34.12	0	0	0	0	0	0	0	0	0	0	0	0	0	0
		40	surrey_84.d	19.068	0	0	0	4822	0	2701	0	0	0	0	0	0	0	0	0	0	0	0	0	0	0	0	0	0	7523	0	0	0	68.6	0	31.4	0	0	0	0	0	0	0	0	0	0	0	0	0	0
		40	surrey_85.d	19.054	0	2200	1475	0	0	0	0	0	0	1712	0	0	0	0	0	0	0	0	0	0	0	0	0	0	5387	0	46.45	15.58	0	0	0	0	0	0	37.97	0	0	0	0	0	0	0	0	0	0
		40	surrey_87.d	19.068	0	3742	0	3952	0	1946	0	0	0	0	0	0	0	1462	0	0	0	0	0	0	0	0	0	0	11102	0	34.95	0	33.88	0	15.07	0	0	0	0	0	0	0	16.1	0	0	0	0	0	0
		40	surrey_88.d	19.084	1840	0	0	0	1362	0	0	0	0	0	0	1802	0	0	0	0	0	0	0	0	0	0	0	0	5003	33.99	0	0	0	26.63	0	0	0	0	0	0	39.38	0	0	0	0	0	0	0	0
		40	surrey_89.d	19.065	0	5282	0	2838	0	0	0	1114	0	0	0	0	0	0	0	0	0	0	0	0	0	0	0	854	10087	0	53.42	0	22.89	0	0	0	12.08	0	0	0	0	0	0	0	0	0	0	0	0
		40	surrey_90.d	19.081	0	3876	0	3874	0	0	1072	0	0	0	0	0	0	1482	0	0	0	0	0	0	0	0	0	0	10303	0	38.13	0	34.28	0	0	10.4	0	0	0	0	0	0	17.19	0	0	0	0	0	0
		40	surrey_91.d	19.06	3508	0	1537	3384	0	1479	0	0	0	0	0	0	0	0	0	0	0	0	0	0	0	0	0	0	9908	39.29	0	12.66	34.69	0	13.37	0	0	0	0	0	0	0	0	0	0	0	0	0	0
		40	surrey_92.d	19.074	0	0	2120	0	0	0	0	0	0	0	0	0	0	0	0	0	0	0	0	0	0	0	0	812	2932	0	0	66.02	0	0	0	0	0	0	0	0	0	0	0	0	0	0	0	0	0
		40	surrey_93.d	19.057	0	3333	0	4906	0	2453	0	0	0	3548	0	0	0	0	0	0	0	0	0	0	0	0	0	0	14240	0	23.86	0	33.35	0	14.54	0	0	0	28.25	0	0	0	0	0	0	0	0	0	0
		40	surrey_94.d	19.056	0	3024	0	3373	0	0	0	1734	0	0	0	0	0	0	0	0	0	0	0	0	0	0	0	0	8131	0	38.01	0	38.61	0	0	0	23.38	0	0	0	0	0	0	0	0	0	0	0	0
		40	surrey_95.d	19.07	0	3462	0	0	0	0	0	1754	0	1270	0	0	0	0	0	0	0	0	0	0	0	0	0	0	6485	0	52.14	0	0	0	0	0	29.25	0	18.61	0	0	0	0	0	0	0	0	0	0
		40	surrey_97.d	19.068	1988	3902	1905	0	0	1721	0	0	0	0	0	0	0	0	0	0	0	0	0	0	0	0	0	0	9516	26.2	44.16	7.55	0	0	22.1	0	0	0	0	0	0	0	0	0	0	0	0	0	0
		40	surrey_98.d	19.082	0	0	0	2851	0	2084	0	1022	0	0	0	0	0	0	0	0	0	0	0	0	0	0	0	0	5957	0	0	0	51.5	0	32.92	0	15.58	0	0	0	0	0	0	0	0	0	0	0	0
		40	surrey_99.d	19.065	0	3541	0	1926	0	1350	0	0	0	0	0	0	0	0	0	0	0	0	0	0	0	0	0	0	6817	0	55.96	0	24.73	0	19.32	0	0	0	0	0	0	0	0	0	0	0	0	0	0
		40	surrey_100.d	19.076	0	2591	0	2785	0	1580	0	0	0	0	0	0	0	0	0	0	0	0	0	0	0	0	0	0	6956	0	39.81	0	39.36	0	20.83	0	0	0	0	0	0	0	0	0	0	0	0	0	0
		40	surrey_101.d	19.06	0	3436	1602	0	0	1722	0	0	0	0	0	0	0	0	0	0	0	0	0	0	0	0	0	0	6760	0	61.51	8.72	0	0	29.76	0	0	0	0	0	0	0	0	0	0	0	0	0	0
		40	surrey_103.d	19.073	0	3400	0	2350	0	0	0	0	0	0	0	0	0	0	0	0	0	0	0	0	0	0	0	0	5750	0	63.09	0	36.91	0	0	0	0	0	0	0	0	0	0	0	0	0	0	0	0
		40	surrey_104.d	19.069	2647	4496	0	3947	0	1619	0	0	0	0	0	0	0	0	0	0	0	0	0	0	0	0	0	0	12709	24.4	32.51	0	31.72	0	11.37	0	0	0	0	0	0	0	0	0	0	0	0	0	0
		40	surrey_105.d	19.07	1525	3309	0	1387	0	1848	0	0	0	0	0	1641	0	0	0	0	0	0	0	0	0	0	0	0	9710	17.13	30.92	0	11.52	0	19.78	0	0	0	0	0	20.65	0	0	0	0	0	0	0	0
[truncated: 8 more columns]
